# Supplementary material
Source: Research Square preprint supplement (doi:10.21203/rs.3.rs-9685923/v1)
Supplement: Supplementary file 1 [file 0d41ac7508c9698c6939132a.docx]

**Supporting Information**

**Figure S1. *E. coli* K-12 chromosome mutagenesis by HoSeI method.**

**Figure S2. Isolation of SSA05102 and YMA11623 by repetitive genome rewriting with HoSeI method.**

**Figure S3. The short histidine kinases detected in the histidine kinase-free SSA05102.**

**Figure S4. The correlation between genome size and the number of sensor kinase and response regulator families of bacteria.**

**Figure S5. Two biplots of principal component scores for transcriptome and proteome.**

**References**

**Figure S1. *E. coli* K-12 chromosome mutagenesis by HoSeI method.** Genome rewriting is represented at 5 locus between 83,000 and 420,000 of *E. coli* MG1655 genome (GeneBank ID: U00096.3). Grey arrow indicates an open reading. Dot box include the used genome cutter and editor (Tables S1, S2, and S3). Red nucleotide and amino acid sequences show the editing substitutions in DNA sequence.

**Figure S1. Continued.** Genome rewriting is represented at 5 locus between 412,000 and 461,000 of *E. coli* MG1655 genome (GeneBank ID: U00096.3). Grey arrow indicates an open reading. Dot box include the used genome cutter and editor (Tables S1, S2, and S3). Red nucleotide and amino acid sequences show the editing substitutions in DNA sequence.

**Figure S1. Continued.** Genome rewriting is represented at 5 locus between 456,000 and 565,000 of *E. coli* MG1655 genome (GeneBank ID: U00096.3). Grey arrow indicates an open reading. Dot box include the used genome cutter and editor (Tables S1, S2, and S3). Red nucleotide and amino acid sequences show the editing substitutions in DNA sequence.

**Figure S1. Continued.** Genome rewriting is represented at 5 locus between 590,000 and 658,000 of *E. coli* MG1655 genome (GeneBank ID: U00096.3). Grey arrow indicates an open reading. Dot box include the used genome cutter and editor (Tables S1, S2, and S3). Red nucleotide and amino acid sequences show the editing substitutions in DNA sequence.

**Figure S1. Continued.** Genome rewriting is represented at 5 locus between 705,000 and 853,000 of *E. coli* MG1655 genome (GeneBank ID: U00096.3). Grey arrow indicates an open reading. Dot box include the used genome cutter and editor (Tables S1, S2, and S3). Red nucleotide and amino acid sequences show the editing substitutions in DNA sequence.

**Figure S1. Continued.** Genome rewriting is represented at 5 locus between 918,000 and 1,067,000 of *E. coli* MG1655 genome (GeneBank ID: U00096.3). Grey arrow indicates an open reading. Dot box include the used genome cutter and editor (Tables S1, S2, and S3). Red nucleotide and amino acid sequences show the editing substitutions in DNA sequence.

**Figure S1. Continued.** Genome rewriting is represented at 5 locus between 1,058,000 and 1,280,000 of *E. coli* MG1655 genome (GeneBank ID: U00096.3). Grey arrow indicates an open reading. Dot box include the used genome cutter and editor (Tables S1, S2, and S3). Red nucleotide and amino acid sequences show the editing substitutions in DNA sequence.

**Figure S1. Continued.** Genome rewriting is represented at 5 locus between 1,272,000 and 1,633,000 of *E. coli* MG1655 genome (GeneBank ID: U00096.3). Grey arrow indicates an open reading. Dot box include the used genome cutter and editor (Tables S1, S2, and S3). Red nucleotide and amino acid sequences show the editing substitutions in DNA sequence.

**Figure S1. Continued.** Genome rewriting is represented at 5 locus between 1,6350,000 and 1,811,000 of *E. coli* MG1655 genome (GeneBank ID: U00096.3). Grey arrow indicates an open reading. Dot box include the used genome cutter and editor (Tables S1, S2, and S3). Red nucleotide and amino acid sequences show the editing substitutions in DNA sequence.

**Figure S1. Continued.** Genome rewriting is represented at 5 locus between 1,962,000 and 2,006,000 of *E. coli* MG1655 genome (GeneBank ID: U00096.3). Grey arrow indicates an open reading. Dot box include the used genome cutter and editor (Tables S1, S2, and S3). Red nucleotide and amino acid sequences show the editing substitutions in DNA sequence.

**Figure S1. Continued.** Genome rewriting is represented at 5 locus between 2,000,000 and 2,095,000 of *E. coli* MG1655 genome (GeneBank ID: U00096.3). Grey arrow indicates an open reading. Dot box include the used genome cutter and editor (Tables S1, S2, and S3). Red nucleotide and amino acid sequences show the editing substitutions in DNA sequence.

**Figure S1. Continued.** Genome rewriting is represented at 5 locus between 2,091,000 and 2,190,000 of *E. coli* MG1655 genome (GeneBank ID: U00096.3). Grey arrow indicates an open reading. Dot box include the used genome cutter and editor (Tables S1, S2, and S3). Red nucleotide and amino acid sequences show the editing substitutions in DNA sequence.

**Figure S1. Continued.** Genome rewriting is represented at 5 locus between 2,207,000 and 2,321,000 of *E. coli* MG1655 genome (GeneBank ID: U00096.3). Grey arrow indicates an open reading. Dot box include the used genome cutter and editor (Tables S1, S2, and S3). Red nucleotide and amino acid sequences show the editing substitutions in DNA sequence.

**Figure S1. Continued.** Genome rewriting is represented at 5 locus between 2,314,000 and 2,488,000 of *E. coli* MG1655 genome (GeneBank ID: U00096.3). Grey arrow indicates an open reading. Dot box include the used genome cutter and editor (Tables S1, S2, and S3). Red nucleotide and amino acid sequences show the editing substitutions in DNA sequence.

**Figure S1. Continued.** Genome rewriting is represented at 5 locus between 2,479,000 and 2,693,000 of *E. coli* MG1655 genome (GeneBank ID: U00096.3). Grey arrow indicates an open reading. Dot box include the used genome cutter and editor (Tables S1, S2, and S3). Red nucleotide and amino acid sequences show the editing substitutions in DNA sequence.

**Figure S1. Continued.** Genome rewriting is represented at 5 locus between 2,686,000 and 2,920,000 of *E. coli* MG1655 genome (GeneBank ID: U00096.3). Grey arrow indicates an open reading. Dot box include the used genome cutter and editor (Tables S1, S2, and S3). Red nucleotide and amino acid sequences show the editing substitutions in DNA sequence.

**Figure S1. Continued.** Genome rewriting is represented at 5 locus between 2,934,000 and 3,349,000 of *E. coli* MG1655 genome (GeneBank ID: U00096.3). Grey arrow indicates an open reading. Dot box include the used genome cutter and editor (Tables S1, S2, and S3). Red nucleotide and amino acid sequences show the editing substitutions in DNA sequence.

**Figure S1. Continued.** Genome rewriting is represented at 5 locus between 3,339,000 and 3,540,000 of *E. coli* MG1655 genome (GeneBank ID: U00096.3). Grey arrow indicates an open reading. Dot box include the used genome cutter and editor (Tables S1, S2, and S3). Red nucleotide and amino acid sequences show the editing substitutions in DNA sequence.

**Figure S1. Continued.** Genome rewriting is represented at 5 locus between 3,531,000 and 3,618,000 of *E. coli* MG1655 genome (GeneBank ID: U00096.3). Grey arrow indicates an open reading. Dot box include the used genome cutter and editor (Tables S1, S2, and S3). Red nucleotide and amino acid sequences show the editing substitutions in DNA sequence.

**Figure S1. Continued.** Genome rewriting is represented at 5 locus between 3,613,000 and 3,855,000 of *E. coli* MG1655 genome (GeneBank ID: U00096.3). Grey arrow indicates an open reading. Dot box include the used genome cutter and editor (Tables S1, S2, and S3). Red nucleotide and amino acid sequences show the editing substitutions in DNA sequence.

**Figure S1. Continued.** Genome rewriting is represented at 5 locus between 3,912,000 and 4,061,000 of *E. coli* MG1655 genome (GeneBank ID: U00096.3). Grey arrow indicates an open reading. Dot box include the used genome cutter and editor (Tables S1, S2, and S3). Red nucleotide and amino acid sequences show the editing substitutions in DNA sequence.

**Figure S1. Continued.** Genome rewriting is represented at 5 locus between 4,099,000 and 4,126,000 of *E. coli* MG1655 genome (GeneBank ID: U00096.3). Grey arrow indicates an open reading. Dot box include the used genome cutter and editor (Tables S1, S2, and S3). Red nucleotide and amino acid sequences show the editing substitutions in DNA sequence.

**Figure S1. Continued.** Genome rewriting is represented at 5 locus between 4,116,000 and 4,208,000 of *E. coli* MG1655 genome (GeneBank ID: U00096.3). Grey arrow indicates an open reading. Dot box include the used genome cutter and editor (Tables S1, S2, and S3). Red nucleotide and amino acid sequences show the editing substitutions in DNA sequence.

**Figure S1. Continued.** Genome rewriting is represented at 5 locus between 4,272,000 and 4,356,000 of *E. coli* MG1655 genome (GeneBank ID: U00096.3). Grey arrow indicates an open reading. Dot box include the used genome cutter and editor (Tables S1, S2, and S3). Red nucleotide and amino acid sequences show the editing substitutions in DNA sequence.

**Figure S1. Continued.** Genome rewriting is represented at 5 locus between 4,513,000 and 4,643,000 of *E. coli* MG1655 genome (GeneBank ID: U00096.3). Grey arrow indicates an open reading. Dot box include the used genome cutter and editor (Tables S1, S2, and S3). Red nucleotide and amino acid sequences show the editing substitutions in DNA sequence.

**Figure S1. Continued.** Genome rewriting is represented at 2 locus between 4,631,000 and 4,645,000 of *E. coli* MG1655 genome (GeneBank ID: U00096.3). Grey arrow indicates an open reading. Dot box include the used genome cutter and editor (Tables S1, S2, and S3). Red nucleotide and amino acid sequences show the editing substitutions in DNA sequence.

**Figure S2. Isolation of SSA05102 and YMA11623 by repetitive genome rewriting with HoSeI method.** [Left] SSA05120 was isolated from W3110 typeA by the following repetitive genome editing; for R15X in *cusS* using the psgRNA-cusS3-12 and the ds cusS_PAM3stop; for V21X in *zraS* using the psgRNA-zraS1-3 and the ds zraS_PAM1stop; for L14X in *kdpD* using the psgRNA-kdpD1-4 and the ds kdpD_PAM1stop; for R50X in *phoQ* using the psgRNA- phoQ2-81 and the ds phoQ_PAM2stop; for W32X in *basS* using the psgRNA-basS1-1 and the ds basS_PAM1stop; for L14X in *baeS* using the psgRNA-baeS1-1 and the ds baeS_PAM1stop; for W14X in *cpxA* using the psgRNA-cpxA1-9 and the ds cpxA_PAM1stop; for A13X in *envZ* using the psgRNA-envZ1-1 and the ds envZ_PAM1stop; for T17X in *evgS* using the psgRNA-evgS1-31 and the ds evgS_PAM1stop; for L17X in *glrK* using the psgRNA-glrK2-1 and the ds glrK_PAM2stop; for A32X in *qseC* using the psgRNA-qseC2-16 and the ds qseC_PAM2stop; for T10X in *rcsC* using the psgRNA-rcsC1-1 and the ds rcsC_PAM1stop; for L31X in *rcsD* using the psgRNA-rcsD7-2 and the ds rcsD_PAM7stop;

for L22X in *rstB* using the psgRNA-rstB5-1 and the ds rstB_PAM5stop; for G22X in *hprS* using the psgRNA-yedV2-2 and the ds yedV_PAM2stop; for M19X in *atoS* using the psgRNA-atoS3-1 and the ds atoS_PAM3stop; for L15X in *barA* using the psgRNA-barA1-1 and the ds barA_PAM1stop; for A24X in *creC* using the psgRNA-creC4-2 and the ds creC_PAM4stop; for L27X in *ntrB* using the psgRNA-ntrB2-3 and the ds ntrB_PAM2stop; for L19X in phoR using the psgRNA-phoR2-4 and the ds phoR_PAM2stop; for A20X in *uhpB* using the psgRNA-uhpB1-11B and the ds uhpB_PAM1stop; for Q35X in *btsS* using the psgRNA-yehU2-4and the ds yehU_PAM2stop; for L22X in *pyrS* using the psgRNA-ypdA3-1 and the ds ypdA_PAM3stop; for L20X in *arcB* using the psgRNA-arcB2-1 and the ds arcB_PAM2stop; for L37X in *citA* using the psgRNA-citA3-5 and the ds citA_PAM3stop; for P14X in *dcuS* using the psgRNA-dcuS1-1 and the ds dcuS_PAM1stop; for R13X in *narQ* using the psgRNA-narQ2-1 and the ds narQ_PAM2stop; for Q14X in *narX* using the psgRNA-narX1-2 and the ds narX_PAM1stop; for L15X in *torS* using the psgRNA-torS3-2 and the ds torS_PAM3stop; and for L20X in *cheA* using the psgRNA-cheA1-1 and the ds cheA_PAM1stop (see Table S3 and Fig. S4 for each editing). [Right] YMA11623 was isolated from W3110 typeA by the following repetitive genome editing;for P29X in *phoB* using the psgRNA-phoB1-17 and the ds phoB_PAM1stop; for G53X in *phoP* using the psgRNA-phoP1-23 and the ds phoP_PAM1stop; for L16X in *ompR* using the psgRNA-ompR5-22 and the ds ompR_PAM5stop; for L16X in *citB* using the psgRNA-citB1-2 and the ds citB_PAM1stop; for P16X in *narL* using the psgRNA-narL2-17 and the ds narL_PAM2stop; for R11X in *cpxR* using the psgRNA-cpxR1-15 and the ds cpxR_PAM1stop; for G16X in *uhpA* using the psgRNA-uhpA1-43 and the ds uhpA_PAM1stop; for L21X in *rstA* using the psgRNA-rstA7-15 and the ds rstA_PAM7stop; for L21X in *evgA* using the psgRNA-evgA1-4 and the ds evgA_PAM1stop; for T19X in *kdpE* using the psgRNA-kdpE1-68 and the ds kdpE_PAM1stop; for P12X in *torR* using the psgRNA-torR3-1 and the ds torR_PAM3stop; for G31X in *uvrY* using the psgRNA-uvrY8-1 and the ds uvrY_PAM8stop; for G33X in *qseB* using the psgRNA-qseB1-21 and the ds qseB_PAM1stop; for A25X in *arcA* using the psgRNA-arcA4-4 and the ds arcA_PAM4stop; for P49X in *atoC* using the psgRNA-atoC8-1 and the ds atoC_PAM8stop; for P11X in *baeR* using the psgRNA-baeR1-1 and the ds baeR_PAM1stop; for G25X in *ntrC* using the psgRNA-ntrC2-4 and the ds ntrC_PAM2stop; for P13X in *rcsB* using the psgRNA-rcsB3-8 and the ds rcsB_PAM3stop; for Q25X in *pyrR* using the psgRNA-pyrR6-1 and the ds pyrR_PAM6stop; for P11X in *btsR* using the psgRNA-yehT3-1 and the ds yehT_PAM3stop; for L19X in *creB* using the psgRNA-creB3-1 and the ds creB_PAM3stop; for T22X in *basR* using the psgRNA-basR2-8 and the ds basR_PAM2stop; for G19X in *cusR* using the psgRNA-cusR2-2 and the ds cusR_PAM2stop; for A38X in *narP* using the psgRNA-narP9-1 and the ds narP_PAM9stop; for H17X in *zraR* using the psgRNA-zraR1-5 and the ds zraR_PAM1stop; for W26X in *rssB* using the psgRNA-rssB2-5 and the ds rssB_PAM2stop; for P15X in *glrR* using the psgRNA-glrR1-1 and the ds glrR_PAM1stop; for P13X in *fimZ* using the psgRNA-fimZ1-1 and the ds fimZ_PAM1stop; for P13X in *ygeL* using the psgRNA-ygeK3-2 and the ds ygeK_PAM3stop; for P25X in *dcuR* using the psgRNA-dcuR7-4 and the ds dcuR_PAM7stop; for G26X in *yhjB* using the psgRNA-yhjB2-2 and the ds yhjB_PAM2stop; for S12X in *cheB* using the psgRNA-cheB1-1 and the ds cheB_PAM1stop; for T16X in *cheY* using the psgRNA-cheY2-2 and the ds cheY_PAM2stop; and for Q13X in *hprR* using the psgRNA-yedW1-1 and the ds yedW_PAM1stop (see Table S3 and Fig. S4 for each editing).

**Figure S3. The short histidine kinases detected in the histidine kinase-free SSA05102.** [a] The detected peptides by LC-MS were mapped in the structure of ArcA, CheA, KdpD, and TorS, which detected in the sensor kinase-free SSA05102. The structure of sensor kinase each is represent with domain, the transmembrane (black), PAS (dark green), PAC (green), histidine kinase (red), response regulatory (purple), CheW-like (white), and HAMP (light gree) as according to P0AEC3 (ArcB), P07363 (CheA), P21865 (KdpD), and P39453 (TorS) in UniProt. The detected peptides from W3110 type-A (grey box), SSA05120 (blue box), and YMA11623 (orange box) were shown under the each protein structure with the first number of amino acid residue. [b] The part of upstream DNA sequence is shown for CheAL (red amino acid residue) and CheAS (blue amino acid residue). The start codon of CheAL and CheAS represents red GTG and blue ATG codons, repectively. [c] W3110 type-A, SSA05102, and YMA11623 were cultured in lysogeny broth (LB) at 37 ℃ until log-phase. The lysates were prepared and subjected to western blotting with anti-CheA antibody. The arrows indicate CheAL (71 kDa molecular weight) and CheAS (60 kDa molecular weight) (Kofoid et al., 1991). [d] W3110 type-A, SSA05102, and YMA11623 harbouring pLux-sucA, pLux-kdpA, and pLux-torR were cultured in LB at 37 ℃ until 0.2 of OD600. Luciferase activity of culture was measured, and the promoter activity was evaluated by the ratio of luciferase intensity to OD600. Experiments were independently performed three times. Results are expressed as average and standard deviation. [e] W3110 type-A, SSA05102, and YMA11623 were spotted onto tryptone swarm agar plate (1 % Bacto tryptone, 0.5 % NaCl, 0.3 % Bacto agar) and then incubated at 25 ℃ overnight.

**Figure S4. The correlation between genome size and the number of sensor kinase and response regulator families of bacteria.** The correlation between genome size and the number of response regulator families is previously shown (Miyake et al., 2020) (grey circle). According to this, the sensor kinase families were analysed. Eighteen groups are detected as two-component sensor kinases from the bacterial genomes of 628 species in the COG database as follows: COG2205, COG5002, COG5000, COG4191, COG0642, COG3850, COG4585, COG0643, COG3290, COG2972, COG3852, COG4251, COG3920, COG3275, COG4564, COG4192, COG3851, and COG4999. The number of COGs involved in the sensor kinases family was analyzed in comparison with the genome size and the average number of COGs (black circle) and standard deviation (SD, error bar) were calculated for each genome size of 0.5, 1, 2, 3, 4, 5, 6, 7, 8, 9, 10, 12, and 15 Mb, which were fitted by the Gompertz curve , where y is the number of COGs and x is the genome size. The number of the number of sensor kinase and response regulator COGs was saturated 12 and 8 COGs, respectively in bacterial genomes more than 5 Mbp in size. Bacterial genomes less than 5 Mbp in size contained the relative COG number of 3 sensor kinase COGs and 2 response regulator COGs per Mbp of genome.

**Figure S5. Two biplots of principal component scores for transcriptome and proteome.** The principal component analysis (PCA) was performed with Python script to characterize transcripts and proteins. The transcriptome data (Table S5-1) [A] and proteome data (Table S5-2) [B] were subject to PCA. Computed principal component scores of each experiment were plotted using PC1 (x-axis) and PC2 (y-axis). In the case of transcriptome, PC1and PC2 contribute 54.0 % and 25.0 %, respectively. In the case of proteome, PC1and PC2 contribute 33.7 % and 15.8 %, respectively. The parent W3110 type-A, sensor kinase-free SSA05102, and response regulator-free YMA11623 were indicated black, blue, and orange dots.

**References**

Kofoid, E. C., & Parkinson, J. S. Tandem translation starts in the *cheA* locus of *Escherichia coli.* *Journal of Bacteriology* **173**, 2116–2119 (1991)

Miyake, Y., & Yamamoto, K. Epistatic effect of regulators to the adaptive growth of *Escherichia coli*. *Scientific Reports* **10**, 3661 (2020)
