# Supplementary material
Source: Research Square preprint supplement (doi:10.21203/rs.3.rs-9685923/v1)
Supplement: Supplementary file 2 [file 4011b45950ef765386a9c1a6.xlsx]

## Sheet: Table S2-1
Table S2-1. The oligonucleotides used for construction of the psgRNA plasmid.
Name	Sequence (5'→3')	Purpose	Reference
aas_psgRNA_N20_com-01	GCTATTTCTAGCTCTAAAACTGTTTTGTATCGCGTTCGCGCTGAAACCGCTGCGGCGATG	construction of psgRNA-aas1	This study
aas_psgRNA_N20-01	CATCGCCGCAGCGGTTTCAGCGCGAACGCGATACAAAACAGTTTTAGAGCTAGAAATAGC	construction of psgRNA-aas1	This study
aas_psgRNA_N20_com-02	GCTATTTCTAGCTCTAAAACTAACGCGAACGCGATACAAACTGAAACCGCTGCGGCGATG	construction of psgRNA-aas2	This study
aas_psgRNA_N20-02	CATCGCCGCAGCGGTTTCAGTTTGTATCGCGTTCGCGTTAGTTTTAGAGCTAGAAATAGC	construction of psgRNA-aas2	This study
aas_psgRNA_N20_com-03	GCTATTTCTAGCTCTAAAACGTAACGCGAACGCGATACAACTGAAACCGCTGCGGCGATG	construction of psgRNA-aas3-1	This study
aas_psgRNA_N20-03	CATCGCCGCAGCGGTTTCAGTTGTATCGCGTTCGCGTTACGTTTTAGAGCTAGAAATAGC	construction of psgRNA-aas3-1	This study
aas_psgRNA_N20_com-04	GCTATTTCTAGCTCTAAAACGGGTGTCACCCGTAACGCGACTGAAACCGCTGCGGCGATG	construction of psgRNA-aas4-1	This study
aas_psgRNA_N20-04	CATCGCCGCAGCGGTTTCAGTCGCGTTACGGGTGACACCCGTTTTAGAGCTAGAAATAGC	construction of psgRNA-aas4-1	This study
aceE_psgRNA_N20_com-04	GCTATTTCTAGCTCTAAAACCGTCATTTGGGAAACGTTCTCTGAAACCGCTGCGGCGATG	construction of psgRNA-aceE4	This study
aceE_psgRNA_N20-04	CATCGCCGCAGCGGTTTCAGAGAACGTTTCCCAAATGACGGTTTTAGAGCTAGAAATAGC	construction of psgRNA-aceE4	This study
aceE_psgRNA_N20_com-05	GCTATTTCTAGCTCTAAAACAAATGACGTGGATCCGATCGCTGAAACCGCTGCGGCGATG	construction of psgRNA-aceE5	This study
aceE_psgRNA_N20-05	CATCGCCGCAGCGGTTTCAGCGATCGGATCCACGTCATTTGTTTTAGAGCTAGAAATAGC	construction of psgRNA-aceE5	This study
aceE_psgRNA_N20_com-06	GCTATTTCTAGCTCTAAAACAATGACGTGGATCCGATCGACTGAAACCGCTGCGGCGATG	construction of psgRNA-aceE6	This study
aceE_psgRNA_N20-06	CATCGCCGCAGCGGTTTCAGTCGATCGGATCCACGTCATTGTTTTAGAGCTAGAAATAGC	construction of psgRNA-aceE6	This study
aceF_psgRNA_N20_com-04	GCTATTTCTAGCTCTAAAACGAGCAGGTGCAGCGTCTGCTCTGAAACCGCTGCGGCGATG	construction of psgRNA-aceF4	This study
aceF_psgRNA_N20-04	CATCGCCGCAGCGGTTTCAGAGCAGACGCTGCACCTGCTCGTTTTAGAGCTAGAAATAGC	construction of psgRNA-aceF4	This study
aceF_psgRNA_N20_com-05	GCTATTTCTAGCTCTAAAACGCTCAGGCAGAAGAGAAGAACTGAAACCGCTGCGGCGATG	construction of psgRNA-aceF5	This study
aceF_psgRNA_N20-05	CATCGCCGCAGCGGTTTCAGTTCTTCTCTTCTGCCTGAGCGTTTTAGAGCTAGAAATAGC	construction of psgRNA-aceF5	This study
aceF_psgRNA_N20_com-06	GCTATTTCTAGCTCTAAAACGAGCTGCTTCTTTCTTCTCTCTGAAACCGCTGCGGCGATG	construction of psgRNA-aceF6	This study
aceF_psgRNA_N20-06	CATCGCCGCAGCGGTTTCAGAGAGAAGAAAGAAGCAGCTCGTTTTAGAGCTAGAAATAGC	construction of psgRNA-aceF6	This study
ackA_psgRNA_N20_com-04	GCTATTTCTAGCTCTAAAACCAGTTCAGAACCAGTACTAACTGAAACCGCTGCGGCGATG	construction of psgRNA-ackA4	This study
ackA_psgRNA_N20-04	CATCGCCGCAGCGGTTTCAGTTAGTACTGGTTCTGAACTGGTTTTAGAGCTAGAAATAGC	construction of psgRNA-ackA4	This study
ackA_psgRNA_N20_com-05	GCTATTTCTAGCTCTAAAACTTTACTGCATCGATGATGGCCTGAAACCGCTGCGGCGATG	construction of psgRNA-ackA5	This study
ackA_psgRNA_N20-05	CATCGCCGCAGCGGTTTCAGGCCATCATCGATGCAGTAAAGTTTTAGAGCTAGAAATAGC	construction of psgRNA-ackA5	This study
ackA_psgRNA_N20_com-06	GCTATTTCTAGCTCTAAAACGAAAGGTACTCTTCACCATTCTGAAACCGCTGCGGCGATG	construction of psgRNA-ackA6	This study
ackA_psgRNA_N20-06	CATCGCCGCAGCGGTTTCAGAATGGTGAAGAGTACCTTTCGTTTTAGAGCTAGAAATAGC	construction of psgRNA-ackA6	This study
acs_psgRNA_N20_com-10	GCTATTTCTAGCTCTAAAACGAAGGTATCAGGTACGTTAACTGAAACCGCTGCGGCGATG	construction of psgRNA-acs10	This study
acs_psgRNA_N20-10	CATCGCCGCAGCGGTTTCAGTTAACGTACCTGATACCTTCGTTTTAGAGCTAGAAATAGC	construction of psgRNA-acs10	This study
acs_psgRNA_N20_com-11	GCTATTTCTAGCTCTAAAACAGAAGGTATCAGGTACGTTACTGAAACCGCTGCGGCGATG	construction of psgRNA-acs11	This study
acs_psgRNA_N20-11	CATCGCCGCAGCGGTTTCAGTAACGTACCTGATACCTTCTGTTTTAGAGCTAGAAATAGC	construction of psgRNA-acs11	This study
acs_psgRNA_N20_com-12	GCTATTTCTAGCTCTAAAACCAGAAGGTATCAGGTACGTTCTGAAACCGCTGCGGCGATG	construction of psgRNA-acs12	This study
acs_psgRNA_N20-12	CATCGCCGCAGCGGTTTCAGAACGTACCTGATACCTTCTGGTTTTAGAGCTAGAAATAGC	construction of psgRNA-acs12	This study
acs_psgRNA_N20_com-04	GCTATTTCTAGCTCTAAAACAATTCACAAACACACCATTCCTGAAACCGCTGCGGCGATG	construction of psgRNA-acs4	This study
acs_psgRNA_N20-04	CATCGCCGCAGCGGTTTCAGGAATGGTGTGTTTGTGAATTGTTTTAGAGCTAGAAATAGC	construction of psgRNA-acs4	This study
acs_psgRNA_N20_com-05	GCTATTTCTAGCTCTAAAACTTCCTGCCAACATCGCAGACCTGAAACCGCTGCGGCGATG	construction of psgRNA-acs5-2	This study
acs_psgRNA_N20-05	CATCGCCGCAGCGGTTTCAGGTCTGCGATGTTGGCAGGAAGTTTTAGAGCTAGAAATAGC	construction of psgRNA-acs5-2	This study
acs_psgRNA_N20_com-06	GCTATTTCTAGCTCTAAAACGATAAACCCTCAGCAGTACGCTGAAACCGCTGCGGCGATG	construction of psgRNA-acs6	This study
acs_psgRNA_N20-06	CATCGCCGCAGCGGTTTCAGCGTACTGCTGAGGGTTTATCGTTTTAGAGCTAGAAATAGC	construction of psgRNA-acs6	This study
acs_psgRNA_N20_com-07	GCTATTTCTAGCTCTAAAACCGTACTGCTGAGGGTTTATCCTGAAACCGCTGCGGCGATG	construction of psgRNA-acs7	This study
acs_psgRNA_N20-07	CATCGCCGCAGCGGTTTCAGGATAAACCCTCAGCAGTACGGTTTTAGAGCTAGAAATAGC	construction of psgRNA-acs7	This study
acs_psgRNA_N20_com-08	GCTATTTCTAGCTCTAAAACTCAGCAGTACGAGGCGATGTCTGAAACCGCTGCGGCGATG	construction of psgRNA-acs8	This study
acs_psgRNA_N20-08	CATCGCCGCAGCGGTTTCAGACATCGCCTCGTACTGCTGAGTTTTAGAGCTAGAAATAGC	construction of psgRNA-acs8	This study
acs_psgRNA_N20_com-09	GCTATTTCTAGCTCTAAAACCAGCAGTACGAGGCGATGTACTGAAACCGCTGCGGCGATG	construction of psgRNA-acs9	This study
acs_psgRNA_N20-09	CATCGCCGCAGCGGTTTCAGTACATCGCCTCGTACTGCTGGTTTTAGAGCTAGAAATAGC	construction of psgRNA-acs9	This study
anmK_psgRNA_N20_com-01	GCTATTTCTAGCTCTAAAACATAAAGCGGCCCGATTTCATCTGAAACCGCTGCGGCGATG	construction of psgRNA-anmK1-2	This study
anmK_psgRNA_N20-01	CATCGCCGCAGCGGTTTCAGATGAAATCGGGCCGCTTTATGTTTTAGAGCTAGAAATAGC	construction of psgRNA-anmK1-2	This study
anmK_psgRNA_N20_com-02	GCTATTTCTAGCTCTAAAACCTTTATTGGCGTTATGTCAGCTGAAACCGCTGCGGCGATG	construction of psgRNA-anmK2-1	This study
anmK_psgRNA_N20-02	CATCGCCGCAGCGGTTTCAGCTGACATAACGCCAATAAAGGTTTTAGAGCTAGAAATAGC	construction of psgRNA-anmK2-1	This study
anmK_psgRNA_N20_com-03	GCTATTTCTAGCTCTAAAACTCAAGGCTGGTGCCTGACATCTGAAACCGCTGCGGCGATG	construction of psgRNA-anmK3-2	This study
anmK_psgRNA_N20-03	CATCGCCGCAGCGGTTTCAGATGTCAGGCACCAGCCTTGAGTTTTAGAGCTAGAAATAGC	construction of psgRNA-anmK3-2	This study
anmK_psgRNA_N20_com-04	GCTATTTCTAGCTCTAAAACGCCTTGATGGTGTTGATGTTCTGAAACCGCTGCGGCGATG	construction of psgRNA-anmK4-1	This study
anmK_psgRNA_N20-04	CATCGCCGCAGCGGTTTCAGAACATCAACACCATCAAGGCGTTTTAGAGCTAGAAATAGC	construction of psgRNA-anmK4-1	This study
apt_psgRNA_N20_com-01	GCTATTTCTAGCTCTAAAACCGACTGCACAGCAGCTTGAGCTGAAACCGCTGCGGCGATG	construction of psgRNA-apt1	This study
apt_psgRNA_N20-01	CATCGCCGCAGCGGTTTCAGCTCAAGCTGCTGTGCAGTCGGTTTTAGAGCTAGAAATAGC	construction of psgRNA-apt1	This study
apt_psgRNA_N20_com-02	GCTATTTCTAGCTCTAAAACGAATGCTTTTGATGCTATTTCTGAAACCGCTGCGGCGATG	construction of psgRNA-apt2	This study
apt_psgRNA_N20-02	CATCGCCGCAGCGGTTTCAGAAATAGCATCAAAAGCATTCGTTTTAGAGCTAGAAATAGC	construction of psgRNA-apt2	This study
apt_psgRNA_N20_com-03	GCTATTTCTAGCTCTAAAACGGTTTTGGGTAGTCCTGAATCTGAAACCGCTGCGGCGATG	construction of psgRNA-apt3	This study
apt_psgRNA_N20-03	CATCGCCGCAGCGGTTTCAGATTCAGGACTACCCAAAACCGTTTTAGAGCTAGAAATAGC	construction of psgRNA-apt3	This study
apt_psgRNA_N20_com-04	GCTATTTCTAGCTCTAAAACAAAACCCGGCATTCTTTTCCCTGAAACCGCTGCGGCGATG	construction of psgRNA-apt4	This study
apt_psgRNA_N20-04	CATCGCCGCAGCGGTTTCAGGGAAAAGAATGCCGGGTTTTGTTTTAGAGCTAGAAATAGC	construction of psgRNA-apt4	This study
apt_psgRNA_N20_com-05	GCTATTTCTAGCTCTAAAACAAACCCGGCATTCTTTTCCGCTGAAACCGCTGCGGCGATG	construction of psgRNA-apt5	This study
apt_psgRNA_N20-05	CATCGCCGCAGCGGTTTCAGCGGAAAAGAATGCCGGGTTTGTTTTAGAGCTAGAAATAGC	construction of psgRNA-apt5	This study
apt_psgRNA_N20_com-06	GCTATTTCTAGCTCTAAAACGGCATTCTTTTCCGCGATGTCTGAAACCGCTGCGGCGATG	construction of psgRNA-apt6	This study
apt_psgRNA_N20-06	CATCGCCGCAGCGGTTTCAGACATCGCGGAAAAGAATGCCGTTTTAGAGCTAGAAATAGC	construction of psgRNA-apt6	This study
arcA_sgRNA_com-1	TTCTAGCTCTAAAACACTCGTCTTCAACGATAAGACTGAAACCGCTGCGG	construction of psgRNA-arcA1-10	This study
arcA_sgRNA_N20-1	CCGCAGCGGTTTCAGCTTATCGTTGAAGACGAGTGTTTTAGAGCTAGAA	construction of psgRNA-arcA1-10	This study
arcA_sgRNA_com-2	TTCTAGCTCTAAAACGCTCGCGCAGTTCACGCGCTCTGAAACCGCTGCGG	construction of psgRNA-arcA2-11	This study
arcA_sgRNA_N20-2	CCGCAGCGGTTTCAGAGCGCGTGAACTGCGCGAGCGTTTTAGAGCTAGAA	construction of psgRNA-arcA2-11	This study
arcA_sgRNA_com-3	TTCTAGCTCTAAAACGTCAGGAACATCAACGCAACCTGAAACCGCTGCGG	construction of psgRNA-arcA3-12	This study
arcA_sgRNA_N20-3	CCGCAGCGGTTTCAGGTTGCGTTGATGTTCCTGACGTTTTAGAGCTAGAA	construction of psgRNA-arcA3-12	This study
arcA_sgRNA_com-4	TTCTAGCTCTAAAACCTTCGAAAATACTTTTCAACCTGAAACCGCTGCGG	construction of psgRNA-arcA4-4	Miyake et al, 2020 (as the arcA_sgRNA_com)
arcA_sgRNA_N20-4	CCGCAGCGGTTTCAGGTTGAAAAGTATTTTCGAAGGTTTTAGAGCTAGAA	construction of psgRNA-arcA4-4	Miyake et al, 2020 (as the arcA_sgRNA_N20)
arcA_sgRNA_com-5	TTCTAGCTCTAAAACTCCGCTTCGAAAATACTTTTCTGAAACCGCTGCGG	construction of psgRNA-arcA5-13	This study
arcA_sgRNA_N20-5	CCGCAGCGGTTTCAGAAAAGTATTTTCGAAGCGGAGTTTTAGAGCTAGAA	construction of psgRNA-arcA5-13	This study
arcA_sgRNA_com-6	TTCTAGCTCTAAAACTCTGTCGCTTCGAAAACATCCTGAAACCGCTGCGG	construction of psgRNA-arcA6-6	This study
arcA_sgRNA_N20-6	CCGCAGCGGTTTCAGGATGTTTTCGAAGCGACAGAGTTTTAGAGCTAGAA	construction of psgRNA-arcA6-6	This study
arcB_sgRNA_com-1	TTCTAGCTCTAAAACAACTTCATCATCAGGTCAACCTGAAACCGCTGCGG	construction of psgRNA-arcB1-4	This study
arcB_sgRNA_N20-1	CCGCAGCGGTTTCAGGTTGACCTGATGATGAAGTTGTTTTAGAGCTAGAA	construction of psgRNA-arcB1-4	This study
arcB_sgRNA_com-2	TTCTAGCTCTAAAACGACCTAACTTCATCATCAGGCTGAAACCGCTGCGG	construction of psgRNA-arcB2-1	This study
arcB_sgRNA_N20-2	CCGCAGCGGTTTCAGCCTGATGATGAAGTTAGGTCGTTTTAGAGCTAGAA	construction of psgRNA-arcB2-1	This study
arcB_sgRNA_com-3	TTCTAGCTCTAAAACGATGATGAAGTTAGGTCTGGCTGAAACCGCTGCGG	construction of psgRNA-arcB3-1	This study
arcB_sgRNA_N20-3	CCGCAGCGGTTTCAGCCAGACCTAACTTCATCATCGTTTTAGAGCTAGAA	construction of psgRNA-arcB3-1	This study
arnA_psgRNA_N20_com-01	GCTATTTCTAGCTCTAAAACTCGTTTTTGCCTACCACGATCTGAAACCGCTGCGGCGATG	construction of psgRNA-arnA1-2	This study
arnA_psgRNA_N20-01	CATCGCCGCAGCGGTTTCAGATCGTGGTAGGCAAAAACGAGTTTTAGAGCTAGAAATAGC	construction of psgRNA-arnA1-2	This study
arnA_psgRNA_N20_com-02	GCTATTTCTAGCTCTAAAACTATCGTGGTAGGCAAAAACGCTGAAACCGCTGCGGCGATG	construction of psgRNA-arnA2-1	This study
arnA_psgRNA_N20-02	CATCGCCGCAGCGGTTTCAGCGTTTTTGCCTACCACGATAGTTTTAGAGCTAGAAATAGC	construction of psgRNA-arnA2-1	This study
arnA_psgRNA_N20_com-03	GCTATTTCTAGCTCTAAAACACCACGATATGGGATGCCTCCTGAAACCGCTGCGGCGATG	construction of psgRNA-arnA3-2	This study
arnA_psgRNA_N20-03	CATCGCCGCAGCGGTTTCAGGAGGCATCCCATATCGTGGTGTTTTAGAGCTAGAAATAGC	construction of psgRNA-arnA3-2	This study
arnA_psgRNA_N20_com-04	GCTATTTCTAGCTCTAAAACGCAGGGCTTCAATACCGAGGCTGAAACCGCTGCGGCGATG	construction of psgRNA-arnA4-2	This study
arnA_psgRNA_N20-04	CATCGCCGCAGCGGTTTCAGCCTCGGTATTGAAGCCCTGCGTTTTAGAGCTAGAAATAGC	construction of psgRNA-arnA4-2	This study
aroP-pdhR_psgRNA_N20_com-01	GCTATTTCTAGCTCTAAAACTGCATAAAGCGGGTGCATTCCTGAAACCGCTGCGGCGATG	construction of psgRNA-aroP-pdhR1	This study
aroP-pdhR_psgRNA_N20-01	CATCGCCGCAGCGGTTTCAGGAATGCACCCGCTTTATGCAGTTTTAGAGCTAGAAATAGC	construction of psgRNA-aroP-pdhR1	This study
aroP-pdhR_psgRNA_N20_com-02	GCTATTTCTAGCTCTAAAACGCTTTATGCATGGTTGAAGACTGAAACCGCTGCGGCGATG	construction of psgRNA-aroP-pdhR2	This study
aroP-pdhR_psgRNA_N20-02	CATCGCCGCAGCGGTTTCAGTCTTCAACCATGCATAAAGCGTTTTAGAGCTAGAAATAGC	construction of psgRNA-aroP-pdhR2	This study
aroP-pdhR_psgRNA_N20_com-03	GCTATTTCTAGCTCTAAAACTTTGTAAAGCTCAGCCTCAACTGAAACCGCTGCGGCGATG	construction of psgRNA-aroP-pdhR3	This study
aroP-pdhR_psgRNA_N20-03	CATCGCCGCAGCGGTTTCAGTTGAGGCTGAGCTTTACAAAGTTTTAGAGCTAGAAATAGC	construction of psgRNA-aroP-pdhR3	This study
artJ_psgRNA_N20_com-01	GCTATTTCTAGCTCTAAAACCTTTACTTGCTTCCTTTACTCTGAAACCGCTGCGGCGATG	construction of psgRNA-artJ1	This study
artJ_psgRNA_N20-01	CATCGCCGCAGCGGTTTCAGAGTAAAGGAAGCAAGTAAAGGTTTTAGAGCTAGAAATAGC	construction of psgRNA-artJ1	This study
artJ_psgRNA_N20_com-02	GCTATTTCTAGCTCTAAAACAAAGTAAAGGAAGCAAGTAACTGAAACCGCTGCGGCGATG	construction of psgRNA-artJ2	This study
artJ_psgRNA_N20-02	CATCGCCGCAGCGGTTTCAGTTACTTGCTTCCTTTACTTTGTTTTAGAGCTAGAAATAGC	construction of psgRNA-artJ2	This study
artJ_psgRNA_N20_com-03	GCTATTTCTAGCTCTAAAACTTACTTTCGGTGCTTCTGCCCTGAAACCGCTGCGGCGATG	construction of psgRNA-artJ3	This study
artJ_psgRNA_N20-03	CATCGCCGCAGCGGTTTCAGGGCAGAAGCACCGAAAGTAAGTTTTAGAGCTAGAAATAGC	construction of psgRNA-artJ3	This study
artM_psgRNA_N20_com-01	GCTATTTCTAGCTCTAAAACTTCATCAGTTCGGGTAAATACTGAAACCGCTGCGGCGATG	construction of psgRNA-artM1	This study
artM_psgRNA_N20-01	CATCGCCGCAGCGGTTTCAGTATTTACCCGAACTGATGAAGTTTTAGAGCTAGAAATAGC	construction of psgRNA-artM1	This study
artM_psgRNA_N20_com-02	GCTATTTCTAGCTCTAAAACTTTCATCAGTTCGGGTAAATCTGAAACCGCTGCGGCGATG	construction of psgRNA-artM2	This study
artM_psgRNA_N20-02	CATCGCCGCAGCGGTTTCAGATTTACCCGAACTGATGAAAGTTTTAGAGCTAGAAATAGC	construction of psgRNA-artM2	This study
artM_psgRNA_N20_com-03	GCTATTTCTAGCTCTAAAACGAACTGATGAAAGGGCTACACTGAAACCGCTGCGGCGATG	construction of psgRNA-artM3	This study
artM_psgRNA_N20-03	CATCGCCGCAGCGGTTTCAGTGTAGCCCTTTCATCAGTTCGTTTTAGAGCTAGAAATAGC	construction of psgRNA-artM3	This study
atoC_sgRNA_com-1	TTCTAGCTCTAAAACTATGCTGAGCACCGCTTTTGCTGAAACCGCTGCGG	construction of psgRNA-atoC1-1	This study
atoC_sgRNA_N20-1	CCGCAGCGGTTTCAGCAAAAGCGGTGCTCAGCATAGTTTTAGAGCTAGAA	construction of psgRNA-atoC1-1	This study
atoC_sgRNA_com-2	TTCTAGCTCTAAAACCTTTTGCACTACAAGGATTCCTGAAACCGCTGCGG	construction of psgRNA-atoC2-2	This study
atoC_sgRNA_N20-2	CCGCAGCGGTTTCAGGAATCCTTGTAGTGCAAAAGGTTTTAGAGCTAGAA	construction of psgRNA-atoC2-2	This study
atoC_sgRNA_com-3	TTCTAGCTCTAAAACTTGTTCGCACAATGTGTTTCCTGAAACCGCTGCGG	construction of psgRNA-atoC3-1	This study
atoC_sgRNA_N20-3	CCGCAGCGGTTTCAGGAAACACATTGTGCGAACAAGTTTTAGAGCTAGAA	construction of psgRNA-atoC3-1	This study
atoC_sgRNA_com-4	TTCTAGCTCTAAAACGTTTGCCGATATTCACCCTGCTGAAACCGCTGCGG	construction of psgRNA-atoC4-1	This study
atoC_sgRNA_N20-4	CCGCAGCGGTTTCAGCAGGGTGAATATCGGCAAACGTTTTAGAGCTAGAA	construction of psgRNA-atoC4-1	This study
atoC_sgRNA_com-5	TTCTAGCTCTAAAACCATCAGGGTGAATATCGGCACTGAAACCGCTGCGG	construction of psgRNA-atoC5-2	This study
atoC_sgRNA_N20-5	CCGCAGCGGTTTCAGTGCCGATATTCACCCTGATGGTTTTAGAGCTAGAA	construction of psgRNA-atoC5-2	This study
atoC_sgRNA_com-6	TTCTAGCTCTAAAACATATTCACCCTGATGTGGTGCTGAAACCGCTGCGG	construction of psgRNA-atoC6-1	This study
atoC_sgRNA_N20-6	CCGCAGCGGTTTCAGCACCACATCAGGGTGAATATGTTTTAGAGCTAGAA	construction of psgRNA-atoC6-1	This study
atoC_sgRNA_com-7	TTCTAGCTCTAAAACTCAACACCACATCAGGGTGACTGAAACCGCTGCGG	construction of psgRNA-atoC7-2	This study
atoC_sgRNA_N20-7	CCGCAGCGGTTTCAGTCACCCTGATGTGGTGTTGAGTTTTAGAGCTAGAA	construction of psgRNA-atoC7-2	This study
atoC_sgRNA_com-8	TTCTAGCTCTAAAACTGATGTGGTGTTGATGGATACTGAAACCGCTGCGG	construction of psgRNA-atoC8-1	This study
atoC_sgRNA_N20-8	CCGCAGCGGTTTCAGTATCCATCAACACCACATCAGTTTTAGAGCTAGAA	construction of psgRNA-atoC8-1	This study
atoS_sgRNA_com-1	TTCTAGCTCTAAAACCGCCGCTTACGCAATCAAATCTGAAACCGCTGCGG	construction of psgRNA-atoS1-1	This study
atoS_sgRNA_N20-1	CCGCAGCGGTTTCAGATTTGATTGCGTAAGCGGCGGTTTTAGAGCTAGAA	construction of psgRNA-atoS1-1	This study
atoS_sgRNA_com-2	TTCTAGCTCTAAAACCTTACGCAATCAAATGATCCCTGAAACCGCTGCGG	construction of psgRNA-atoS2-2	This study
atoS_sgRNA_N20-2	CCGCAGCGGTTTCAGGGATCATTTGATTGCGTAAGGTTTTAGAGCTAGAA	construction of psgRNA-atoS2-2	This study
atoS_sgRNA_com-3	TTCTAGCTCTAAAACTCAGGATCATTTGATTGCGTCTGAAACCGCTGCGG	construction of psgRNA-atoS3-1	This study
atoS_sgRNA_N20-3	CCGCAGCGGTTTCAGACGCAATCAAATGATCCTGAGTTTTAGAGCTAGAA	construction of psgRNA-atoS3-1	This study
atpA_sgRNA_com_4	TTCTAGCTCTAAAACTCGTTGTGAGCTTCACTCACCTGAAACCGCTGCGG	construction of psgRNA-atpA4-3	This study
atpA_sgRNA_No20_4	CCGCAGCGGTTTCAGGTGAGTGAAGCTCACAACGAGTTTTAGAGCTAGAA	construction of psgRNA-atpA4-3	This study
atpA_sgRNA_com_6	TTCTAGCTCTAAAACTGAATGCGGATAACACCGTCCTGAAACCGCTGCGG	construction of psgRNA-atpA6-1	This study
atpA_sgRNA_No20_6	CCGCAGCGGTTTCAGGACGGTGTTATCCGCATTCAGTTTTAGAGCTAGAA	construction of psgRNA-atpA6-1	This study
atpA_sgRNA_com_7	TTCTAGCTCTAAAACCATTCACGGCCTGGCCGATTCTGAAACCGCTGCGG	construction of psgRNA-atpA7-1	This study
atpA_sgRNA_No20_7	CCGCAGCGGTTTCAGAATCGGCCAGGCCGTGAATGGTTTTAGAGCTAGAA	construction of psgRNA-atpA7-1	This study
atpA_sgRNA_com_8	TTCTAGCTCTAAAACGCATACAATCGGCCAGGCCGCTGAAACCGCTGCGG	construction of psgRNA-atpA8-2	This study
atpA_sgRNA_No20_8	CCGCAGCGGTTTCAGCGGCCTGGCCGATTGTATGCGTTTTAGAGCTAGAA	construction of psgRNA-atpA8-2	This study
atpD_sgRNA_com_1	TTCTAGCTCTAAAACTCTTAAATCCTCTACGAAATCTGAAACCGCTGCGG	construction of psgRNA-atpD1-6	Ogawa et al, 2022 (as the atpD_sgRNA_N20)
atpD_sgRNA_No20_1	CCGCAGCGGTTTCAGATTTCGTAGAGGATTTAAGAGTTTTAGAGCTAGAA	construction of psgRNA-atpD1-6	Ogawa et al, 2022 (as the atpD_sgRNA_com)
atpD_sgRNA_com_2	TTCTAGCTCTAAAACGTAGCCATCTTAAATCCTCTCTGAAACCGCTGCGG	construction of psgRNA-atpD2-4	This study
atpD_sgRNA_No20_2	CCGCAGCGGTTTCAGAGAGGATTTAAGATGGCTACGTTTTAGAGCTAGAA	construction of psgRNA-atpD2-4	This study
atpD_sgRNA_com_3	TTCTAGCTCTAAAACGGACAATCTTTCCAGTAGCCCTGAAACCGCTGCGG	construction of psgRNA-atpD3-1	This study
atpD_sgRNA_No20_3	CCGCAGCGGTTTCAGGGCTACTGGAAAGATTGTCCGTTTTAGAGCTAGAA	construction of psgRNA-atpD3-1	This study
atpE_sgRNA_com_1	TTCTAGCTCTAAAACTATTCAGGTTTTCCATGACACTGAAACCGCTGCGG	construction of psgRNA-atpE1-2	This study
atpE_sgRNA_No20_1	CCGCAGCGGTTTCAGTGTCATGGAAAACCTGAATAGTTTTAGAGCTAGAA	construction of psgRNA-atpE1-2	This study
atpE_sgRNA_com_2	TTCTAGCTCTAAAACGAATATGGATCTGCTGTACACTGAAACCGCTGCGG	construction of psgRNA-atpE2-2	Ogawa et al, 2022 (as the atpE_sgRNA_N20)
atpE_sgRNA_No20_2	CCGCAGCGGTTTCAGTGTACAGCAGATCCATATTCGTTTTAGAGCTAGAA	construction of psgRNA-atpE2-2	Ogawa et al, 2022 (as the atpE_sgRNA_com)
baeR_sgRNA_com-1	TTCTAGCTCTAAAACCGTATTTTGATCGTGGAAGACTGAAACCGCTGCGG	construction of psgRNA-baeR1-1	Miyake et al, 2020 (as the baeR_sgRNA_com)
baeR_sgRNA_N20-1	CCGCAGCGGTTTCAGTCTTCCACGATCAAAATACGGTTTTAGAGCTAGAA	construction of psgRNA-baeR1-1	Miyake et al, 2020 (as the baeR_sgRNA_N20)
baeR_sgRNA_com-2	TTCTAGCTCTAAAACGCTTCGGTTCATCTTCCACGCTGAAACCGCTGCGG	construction of psgRNA-baeR2-1	This study
baeR_sgRNA_N20-2	CCGCAGCGGTTTCAGCGTGGAAGATGAACCGAAGCGTTTTAGAGCTAGAA	construction of psgRNA-baeR2-1	This study
baeR_sgRNA_com-3	TTCTAGCTCTAAAACAGCTTCGGTTCATCTTCCACCTGAAACCGCTGCGG	construction of psgRNA-baeR3-4	This study
baeR_sgRNA_N20-3	CCGCAGCGGTTTCAGGTGGAAGATGAACCGAAGCTGTTTTAGAGCTAGAA	construction of psgRNA-baeR3-4	This study
baeS_sgRNA_com-1	TTCTAGCTCTAAAACGAAACAGTTTGCCGGTAATACTGAAACCGCTGCGG	construction of psgRNA-baeS1-1	This study
baeS_sgRNA_N20-1	CCGCAGCGGTTTCAGTATTACCGGCAAACTGTTTCGTTTTAGAGCTAGAA	construction of psgRNA-baeS1-1	This study
baeS_sgRNA_com-2	TTCTAGCTCTAAAACGCAAACTGTTTCTGGCGATTCTGAAACCGCTGCGG	construction of psgRNA-baeS2-1	This study
baeS_sgRNA_N20-2	CCGCAGCGGTTTCAGAATCGCCAGAAACAGTTTGCGTTTTAGAGCTAGAA	construction of psgRNA-baeS2-1	This study
baeS_sgRNA_com-3	TTCTAGCTCTAAAACCCTGCATTGTCTTGCTGATCCTGAAACCGCTGCGG	construction of psgRNA-baeS3-5	This study
baeS_sgRNA_N20-3	CCGCAGCGGTTTCAGGATCAGCAAGACAATGCAGGGTTTTAGAGCTAGAA	construction of psgRNA-baeS3-5	This study
barA_sgRNA_com-1	TTCTAGCTCTAAAACGGATCAGAATCATCATGCGTCTGAAACCGCTGCGG	construction of psgRNA-barA1-2	This study
barA_sgRNA_N20-1	CCGCAGCGGTTTCAGACGCATGATGATTCTGATCCGTTTTAGAGCTAGAA	construction of psgRNA-barA1-2	This study
barA_sgRNA_com-2	TTCTAGCTCTAAAACGGCACCGACCGTCCTTATTGCTGAAACCGCTGCGG	construction of psgRNA-barA2-2	This study
barA_sgRNA_N20-2	CCGCAGCGGTTTCAGCAATAAGGACGGTCGGTGCCGTTTTAGAGCTAGAA	construction of psgRNA-barA2-2	This study
barA_sgRNA_com-3	TTCTAGCTCTAAAACATAAGGACGGTCGGTGCCAGCTGAAACCGCTGCGG	construction of psgRNA-barA3-1	This study
barA_sgRNA_N20-3	CCGCAGCGGTTTCAGCTGGCACCGACCGTCCTTATGTTTTAGAGCTAGAA	construction of psgRNA-barA3-1	This study
basR_sgRNA_com-1	TTCTAGCTCTAAAACTCGGTTTGCGCCGCCAGAATCTGAAACCGCTGCGG	construction of psgRNA-basR1-42	This study
basR_sgRNA_N20-1	CCGCAGCGGTTTCAGATTCTGGCGGCGCAAACCGAGTTTTAGAGCTAGAA	construction of psgRNA-basR1-42	This study
basR_sgRNA_com-2	TTCTAGCTCTAAAACAAGGCTACGCGTGCGATAGCCTGAAACCGCTGCGG	construction of psgRNA-basR2-8	Miyake et al, 2020 (as the basR_sgRNA_com)
basR_sgRNA_N20-2	CCGCAGCGGTTTCAGGCTATCGCACGCGTAGCCTTGTTTTAGAGCTAGAA	construction of psgRNA-basR2-8	Miyake et al, 2020 (as the basR_sgRNA_N20)
basR_sgRNA_com-3	TTCTAGCTCTAAAACCGCGGTTGTCACGCTATCGCCTGAAACCGCTGCGG	construction of psgRNA-basR3-6	This study
basR_sgRNA_N20-3	CCGCAGCGGTTTCAGGCGATAGCGTGACAACCGCGGTTTTAGAGCTAGAA	construction of psgRNA-basR3-6	This study
basR_sgRNA_com-4	TTCTAGCTCTAAAACTCCGCGCGGTTGTCACGCTACTGAAACCGCTGCGG	construction of psgRNA-basR4-18	This study
basR_sgRNA_N20-4	CCGCAGCGGTTTCAGTAGCGTGACAACCGCGCGGAGTTTTAGAGCTAGAA	construction of psgRNA-basR4-18	This study
basR_sgRNA_com-5	TTCTAGCTCTAAAACCCATCCGCGCGGTTGTCACGCTGAAACCGCTGCGG	construction of psgRNA-basR5-4	This study
basR_sgRNA_N20-5	CCGCAGCGGTTTCAGCGTGACAACCGCGCGGATGGGTTTTAGAGCTAGAA	construction of psgRNA-basR5-4	This study
basS_sgRNA_com-1	TTCTAGCTCTAAAACGAAGACGCTGATCAGCTCAACTGAAACCGCTGCGG	construction of psgRNA-basS1-1	This study
basS_sgRNA_N20-1	CCGCAGCGGTTTCAGTTGAGCTGATCAGCGTCTTCGTTTTAGAGCTAGAA	construction of psgRNA-basS1-1	This study
basS_sgRNA_com-2	TTCTAGCTCTAAAACTAGCCAGAAGACGCTGATCACTGAAACCGCTGCGG	construction of psgRNA-basS2-28	This study
basS_sgRNA_N20-2	CCGCAGCGGTTTCAGTGATCAGCGTCTTCTGGCTAGTTTTAGAGCTAGAA	construction of psgRNA-basS2-28	This study
basS_sgRNA_com-3	TTCTAGCTCTAAAACGCGGGCGGGTGATGCGGCGTCTGAAACCGCTGCGG	construction of psgRNA-basS3-12	This study
basS_sgRNA_N20-3	CCGCAGCGGTTTCAGACGCCGCATCACCCGCCCGCGTTTTAGAGCTAGAA	construction of psgRNA-basS3-12	This study
betA_psgRNA_N20_com-01	GCTATTTCTAGCTCTAAAACATAATGATGTAGTCAAATTGCTGAAACCGCTGCGGCGATG	construction of psgRNA-betA1	This study
betA_psgRNA_N20-01	CATCGCCGCAGCGGTTTCAGCAATTTGACTACATCATTATGTTTTAGAGCTAGAAATAGC	construction of psgRNA-betA1	This study
betA_psgRNA_N20_com-02	GCTATTTCTAGCTCTAAAACGCACCAATAATGATGTAGTCCTGAAACCGCTGCGGCGATG	construction of psgRNA-betA2	This study
betA_psgRNA_N20-02	CATCGCCGCAGCGGTTTCAGGACTACATCATTATTGGTGCGTTTTAGAGCTAGAAATAGC	construction of psgRNA-betA2	This study
betA_psgRNA_N20_com-03	GCTATTTCTAGCTCTAAAACGCTGAGCCGGCACCAATAATCTGAAACCGCTGCGGCGATG	construction of psgRNA-betA3	This study
betA_psgRNA_N20-03	CATCGCCGCAGCGGTTTCAGATTATTGGTGCCGGCTCAGCGTTTTAGAGCTAGAAATAGC	construction of psgRNA-betA3	This study
cbpA_sgRNA_com-1	TTCTAGCTCTAAAACTCGGTTTCACGCCCATGATGCTGAAACCGCTGCGG	construction of psgRNA-cbpA1	This study
cbpA_sgRNA_N20-1	CCGCAGCGGTTTCAGCATCATGGGCGTGAAACCGAGTTTTAGAGCTAGAA	construction of psgRNA-cbpA1	This study
cbpA_sgRNA_com-2	TTCTAGCTCTAAAACACGGACGATCTCAAGACAATCTGAAACCGCTGCGG	construction of psgRNA-cbpA2	This study
cbpA_sgRNA_N20-２	CCGCAGCGGTTTCAGATTGTCTTGAGATCGTCCGTGTTTTAGAGCTAGAA	construction of psgRNA-cbpA2	This study
cbpA_sgRNA_com-3	TTCTAGCTCTAAAACCCTATCGTCGACTTGCCCGCCTGAAACCGCTGCGG	construction of psgRNA-cbpA3	This study
cbpA_sgRNA_N20-3	CCGCAGCGGTTTCAGGCGGGCAAGTCGACGATAGGGTTTTAGAGCTAGAA	construction of psgRNA-cbpA3	This study
cbpM_sgRNA_com-1	TTCTAGCTCTAAAACAATTTTGCCTGCATACCGGCCTGAAACCGCTGCGG	construction of psgRNA-cbpM1	This study
cbpM_sgRNA_N20-1	CCGCAGCGGTTTCAGGCCGGTATGCAGGCAAAATTGTTTTAGAGCTAGAA	construction of psgRNA-cbpM1	This study
cbpM_sgRNA_com-2	TTCTAGCTCTAAAACGCATACCGGCATCTCTGAAGCTGAAACCGCTGCGG	construction of psgRNA-cbpM2	This study
cbpM_sgRNA_N20-2	CCGCAGCGGTTTCAGCTTCAGAGATGCCGGTATGCGTTTTAGAGCTAGAA	construction of psgRNA-cbpM2	This study
cbpM_sgRNA_com-3	TTCTAGCTCTAAAACCTTCAGAGATGCCGGTATGCCTGAAACCGCTGCGG	construction of psgRNA-cbpM3	This study
cbpM_sgRNA_N20-3	CCGCAGCGGTTTCAGGCATACCGGCATCTCTGAAGGTTTTAGAGCTAGAA	construction of psgRNA-cbpM3	This study
cdh_psgRNA_N20_com-01	GCTATTTCTAGCTCTAAAACAAAAAAGAAGACCCGCTTTTCTGAAACCGCTGCGGCGATG	construction of psgRNA-cdh1	This study
cdh_psgRNA_N20-01	CATCGCCGCAGCGGTTTCAGAAAAGCGGGTCTTCTTTTTTGTTTTAGAGCTAGAAATAGC	construction of psgRNA-cdh1	This study
cdh_psgRNA_N20_com-02	GCTATTTCTAGCTCTAAAACCAACGGCGATAACTATCATCCTGAAACCGCTGCGGCGATG	construction of psgRNA-cdh2	This study
cdh_psgRNA_N20-02	CATCGCCGCAGCGGTTTCAGGATGATAGTTATCGCCGTTGGTTTTAGAGCTAGAAATAGC	construction of psgRNA-cdh2	This study
cdh_psgRNA_N20_com-03	GCTATTTCTAGCTCTAAAACGCAGCCACAACGGCGATAACCTGAAACCGCTGCGGCGATG	construction of psgRNA-cdh3-2	This study
cdh_psgRNA_N20-03	CATCGCCGCAGCGGTTTCAGGTTATCGCCGTTGTGGCTGCGTTTTAGAGCTAGAAATAGC	construction of psgRNA-cdh3-2	This study
cdh_psgRNA_N20_com-04	GCTATTTCTAGCTCTAAAACATACCGGCAGCCACAACGGCCTGAAACCGCTGCGGCGATG	construction of psgRNA-cdh4-3	This study
cdh_psgRNA_N20-04	CATCGCCGCAGCGGTTTCAGGCCGTTGTGGCTGCCGGTATGTTTTAGAGCTAGAAATAGC	construction of psgRNA-cdh4-3	This study
cheA_sgRNA_com-1	TTCTAGCTCTAAAACACAGTTCGTCCGCTTCATCACTGAAACCGCTGCGG	construction of psgRNA-cheA1-1	This study
cheA_sgRNA_N20-1	CCGCAGCGGTTTCAGTGATGAAGCGGACGAACTGTGTTTTAGAGCTAGAA	construction of psgRNA-cheA1-1	This study
cheA_sgRNA_com-2	TTCTAGCTCTAAAACTGTCAGCCAACAGTTCGTCCCTGAAACCGCTGCGG	construction of psgRNA-cheA2-3	This study
cheA_sgRNA_N20-2	CCGCAGCGGTTTCAGGGACGAACTGTTGGCTGACAGTTTTAGAGCTAGAA	construction of psgRNA-cheA2-3	This study
cheA_sgRNA_com-3	TTCTAGCTCTAAAACGCAAATGCTGCTCCATGTCACTGAAACCGCTGCGG	construction of psgRNA-cheA3-3	This study
cheA_sgRNA_N20-3	CCGCAGCGGTTTCAGTGACATGGAGCAGCATTTGCGTTTTAGAGCTAGAA	construction of psgRNA-cheA3-3	This study
cheB_sgRNA_com-1	TTCTAGCTCTAAAACAATCATCGACAGATAACACCCTGAAACCGCTGCGG	construction of psgRNA-cheB1-1	This study
cheB_sgRNA_N20-1	CCGCAGCGGTTTCAGGGTGTTATCTGTCGATGATTGTTTTAGAGCTAGAA	construction of psgRNA-cheB1-1	This study
cheB_sgRNA_com-2	TTCTAGCTCTAAAACGATCATGACAGAAATCATCACTGAAACCGCTGCGG	construction of psgRNA-cheB2-2	This study
cheB_sgRNA_N20-2	CCGCAGCGGTTTCAGTGATGATTTCTGTCATGATCGTTTTAGAGCTAGAA	construction of psgRNA-cheB2-2	This study
cheB_sgRNA_com-3	TTCTAGCTCTAAAACTGTCGCTATGGCTGTTGATGCTGAAACCGCTGCGG	construction of psgRNA-cheB3-2	This study
cheB_sgRNA_N20-3	CCGCAGCGGTTTCAGCATCAACAGCCATAGCGACAGTTTTAGAGCTAGAA	construction of psgRNA-cheB3-2	This study
cheY_sgRNA_com-1	TTCTAGCTCTAAAACCCATGCGACGCATAGTGCGTCTGAAACCGCTGCGG	construction of psgRNA-cheY1-3	This study
cheY_sgRNA_N20-1	CCGCAGCGGTTTCAGACGCACTATGCGTCGCATGGGTTTTAGAGCTAGAA	construction of psgRNA-cheY1-3	This study
cheY_sgRNA_com-2	TTCTAGCTCTAAAACTGCGACGCATAGTGCGTAACCTGAAACCGCTGCGG	construction of psgRNA-cheY2-2	This study
cheY_sgRNA_N20-2	CCGCAGCGGTTTCAGGTTACGCACTATGCGTCGCAGTTTTAGAGCTAGAA	construction of psgRNA-cheY2-2	This study
cheY_sgRNA_com-3	TTCTAGCTCTAAAACGCTCTTTCAGCAGGTTACGCCTGAAACCGCTGCGG	construction of psgRNA-cheY3-5	This study
cheY_sgRNA_N20-3	CCGCAGCGGTTTCAGGCGTAACCTGCTGAAAGAGCGTTTTAGAGCTAGAA	construction of psgRNA-cheY3-5	This study
citA_sgRNA_com-1	TTCTAGCTCTAAAACAAGACTGGCATTTCCGCTGCCTGAAACCGCTGCGG	construction of psgRNA-citA1-4	This study
citA_sgRNA_N20-1	CCGCAGCGGTTTCAGGCAGCGGAAATGCCAGTCTTGTTTTAGAGCTAGAA	construction of psgRNA-citA1-4	This study
citA_sgRNA_com-2	TTCTAGCTCTAAAACCTGCGTATCTTTTTGCTGATCTGAAACCGCTGCGG	construction of psgRNA-citA2-2	This study
citA_sgRNA_N20-2	CCGCAGCGGTTTCAGATCAGCAAAAAGATACGCAGGTTTTAGAGCTAGAA	construction of psgRNA-citA2-2	This study
citA_sgRNA_com-3	TTCTAGCTCTAAAACGGGCTGCAATGACAAATATTCTGAAACCGCTGCGG	construction of psgRNA-citA3-5	This study
citA_sgRNA_N20-3	CCGCAGCGGTTTCAGAATATTTGTCATTGCAGCCCGTTTTAGAGCTAGAA	construction of psgRNA-citA3-5	This study
citB_sgRNA_com-1	TTCTAGCTCTAAAACGCGGCGTTTCGTCCTCAACGCTGAAACCGCTGCGG	construction of psgRNA-citB1-2	This study
citB_sgRNA_N20-1	CCGCAGCGGTTTCAGCGTTGAGGACGAAACGCCGCGTTTTAGAGCTAGAA	construction of psgRNA-citB1-2	This study
citB_sgRNA_com-2	TTCTAGCTCTAAAACCATGCATCTCTGCCAGCGGCCTGAAACCGCTGCGG	construction of psgRNA-citB2-1	This study
citB_sgRNA_N20-2	CCGCAGCGGTTTCAGGCCGCTGGCAGAGATGCATGGTTTTAGAGCTAGAA	construction of psgRNA-citB2-1	This study
citB_sgRNA_com-3	TTCTAGCTCTAAAACCTGGCAGAGATGCATGCGGACTGAAACCGCTGCGG	construction of psgRNA-citB3-1	This study
citB_sgRNA_N20-3	CCGCAGCGGTTTCAGTCCGCATGCATCTCTGCCAGGTTTTAGAGCTAGAA	construction of psgRNA-citB3-1	This study
clpA_sgRNA_com-1	TTCTAGCTCTAAAACGTAACAAGTGCTCGACGGTCCTGAAACCGCTGCGG	construction of psgRNA-clpA1-1	This study
clpA_sgRNA_N20-1	CCGCAGCGGTTTCAGGACCGTCGAGCACTTGTTACGTTTTAGAGCTAGAA	construction of psgRNA-clpA1-1	This study
clpA_sgRNA_com-2	TTCTAGCTCTAAAACCTTCACTGGCAGGCAGAACGCTGAAACCGCTGCGG	construction of psgRNA-clpA2-1	This study
clpA_sgRNA_N20-2	CCGCAGCGGTTTCAGCGTTCTGCCTGCCAGTGAAGGTTTTAGAGCTAGAA	construction of psgRNA-clpA2-1	This study
clpA_sgRNA_com-3	TTCTAGCTCTAAAACTTGATGATTTGAACAGTTTCCTGAAACCGCTGCGG	construction of psgRNA-clpA3-1	This study
clpA_sgRNA_N20-3	CCGCAGCGGTTTCAGGAAACTGTTCAAATCATCAAGTTTTAGAGCTAGAA	construction of psgRNA-clpA3-1	This study
clpA_sgRNA_com-4	TTCTAGCTCTAAAACTCATGAGTTTATGACCGTCGCTGAAACCGCTGCGG	construction of psgRNA-clpA4-1	This study
clpA_sgRNA_N20-4	CCGCAGCGGTTTCAGCGACGGTCATAAACTCATGAGTTTTAGAGCTAGAA	construction of psgRNA-clpA4-1	This study
clpA_sgRNA_com-5	TTCTAGCTCTAAAACGTTCGCTAAAGATAGCGACCCTGAAACCGCTGCGG	construction of psgRNA-clpA5-1	This study
clpA_sgRNA_N20-5	CCGCAGCGGTTTCAGGGTCGCTATCTTTAGCGAACGTTTTAGAGCTAGAA	construction of psgRNA-clpA5-1	This study
clpA_sgRNA_com-6	TTCTAGCTCTAAAACGAGCGCGCGAGCACCGTCATCTGAAACCGCTGCGG	construction of psgRNA-clpA6	This study
clpA_sgRNA_N20-6	CCGCAGCGGTTTCAGATGACGGTGCTCGCGCGCTCGTTTTAGAGCTAGAA	construction of psgRNA-clpA6	This study
clpA_sgRNA_com-7	TTCTAGCTCTAAAACGGGCAGATGGGTTACTGAGCCTGAAACCGCTGCGG	construction of psgRNA-clpA7-2	This study
clpA_sgRNA_N20-7	CCGCAGCGGTTTCAGGCTCAGTAACCCATCTGCCCGTTTTAGAGCTAGAA	construction of psgRNA-clpA7-2	This study
clpP_sgRNA_com-1	TTCTAGCTCTAAAACTATGGCGCTGGTGCCGATGGCTGAAACCGCTGCGG	construction of psgRNA-clpP1-1	This study
clpP_sgRNA_N20-1	CCGCAGCGGTTTCAGCCATCGGCACCAGCGCCATAGTTTTAGAGCTAGAA	construction of psgRNA-clpP1-1	This study
clpP_sgRNA_com-2	TTCTAGCTCTAAAACCGTGAGGTCTGTTCAATGACCTGAAACCGCTGCGG	construction of psgRNA-clpP2-1	This study
clpP_sgRNA_N20-2	CCGCAGCGGTTTCAGGTCATTGAACAGACCTCACGGTTTTAGAGCTAGAA	construction of psgRNA-clpP2-1	This study
clpP_sgRNA_com-3	TTCTAGCTCTAAAACCTTCCAGGAACAGCATCTGCCTGAAACCGCTGCGG	construction of psgRNA-clpP3-1	This study
clpP_sgRNA_N20-3	CCGCAGCGGTTTCAGGCAGATGCTGTTCCTGGAAGGTTTTAGAGCTAGAA	construction of psgRNA-clpP3-1	This study
clpX_sgRNA_com-1	TTCTAGCTCTAAAACGCAATCAGCTTGCGCACTTCCTGAAACCGCTGCGG	construction of psgRNA-clpX1-1	This study
clpX_sgRNA_N20-1	CCGCAGCGGTTTCAGGAAGTGCGCAAGCTGATTGCGTTTTAGAGCTAGAA	construction of psgRNA-clpX1-1	This study
clpX_sgRNA_com-2	TTCTAGCTCTAAAACTGTATATCTGCGACGAATGTCTGAAACCGCTGCGG	construction of psgRNA-clpX2-1	This study
clpX_sgRNA_N20-2	CCGCAGCGGTTTCAGACATTCGTCGCAGATATACAGTTTTAGAGCTAGAA	construction of psgRNA-clpX2-1	This study
clpX_sgRNA_com-3	TTCTAGCTCTAAAACTGGTGAACGGAACATCCAGCCTGAAACCGCTGCGG	construction of psgRNA-clpX3-1	This study
clpX_sgRNA_N20-3	CCGCAGCGGTTTCAGGCTGGATGTTCCGTTCACCAGTTTTAGAGCTAGAA	construction of psgRNA-clpX3-1	This study
cpsG_psgRNA_N20_com-01	GCTATTTCTAGCTCTAAAACGCTTTAAAGCCTATGATATTCTGAAACCGCTGCGGCGATG	construction of psgRNA-cpsG1-1	This study
cpsG_psgRNA_N20-01	CATCGCCGCAGCGGTTTCAGAATATCATAGGCTTTAAAGCGTTTTAGAGCTAGAAATAGC	construction of psgRNA-cpsG1-1	This study
cpsG_psgRNA_N20_com-02	GCTATTTCTAGCTCTAAAACCGAATATCATAGGCTTTAAACTGAAACCGCTGCGGCGATG	construction of psgRNA-cpsG2-1	This study
cpsG_psgRNA_N20-02	CATCGCCGCAGCGGTTTCAGTTTAAAGCCTATGATATTCGGTTTTAGAGCTAGAAATAGC	construction of psgRNA-cpsG2-1	This study
cpsG_psgRNA_N20_com-03	GCTATTTCTAGCTCTAAAACATGATATTCGCGGGAAATTACTGAAACCGCTGCGGCGATG	construction of psgRNA-cpsG3-2	This study
cpsG_psgRNA_N20-03	CATCGCCGCAGCGGTTTCAGTAATTTCCCGCGAATATCATGTTTTAGAGCTAGAAATAGC	construction of psgRNA-cpsG3-2	This study
cpsG_psgRNA_N20_com-04	GCTATTTCTAGCTCTAAAACGGCGATATCTTCATTCAGTTCTGAAACCGCTGCGGCGATG	construction of psgRNA-cpsG4-1	This study
cpsG_psgRNA_N20-04	CATCGCCGCAGCGGTTTCAGAACTGAATGAAGATATCGCCGTTTTAGAGCTAGAAATAGC	construction of psgRNA-cpsG4-1	This study
cpxA_sgRNA_com-1	TTCTAGCTCTAAAACGAAGATGGCGAAGATGCGCGCTGAAACCGCTGCGG	construction of psgRNA-cpxA1-9	This study
cpxA_sgRNA_N20-1	CCGCAGCGGTTTCAGCGCGCATCTTCGCCATCTTCGTTTTAGAGCTAGAA	construction of psgRNA-cpxA1-9	This study
cpxA_sgRNA_com-2	TTCTAGCTCTAAAACGCGTCAGCCAGAAGATGGCGCTGAAACCGCTGCGG	construction of psgRNA-cpxA2-1	This study
cpxA_sgRNA_N20-2	CCGCAGCGGTTTCAGCGCCATCTTCTGGCTGACGCGTTTTAGAGCTAGAA	construction of psgRNA-cpxA2-1	This study
cpxA_sgRNA_com-3	TTCTAGCTCTAAAACTCTTCTGGCTGACGCTGGCGCTGAAACCGCTGCGG	construction of psgRNA-cpxA3-1	This study
cpxA_sgRNA_N20-3	CCGCAGCGGTTTCAGCGCCAGCGTCAGCCAGAAGAGTTTTAGAGCTAGAA	construction of psgRNA-cpxA3-1	This study
cpxR_sgRNA_com-1	TTCTAGCTCTAAAACAGAGCTGACTTCCCTATTAACTGAAACCGCTGCGG	construction of psgRNA-cpxR1-15	Miyake et al, 2020 (as the cpxR_sgRNA_com)
cpxR_sgRNA_N20-1	CCGCAGCGGTTTCAGTTAATAGGGAAGTCAGCTCTGTTTTAGAGCTAGAA	construction of psgRNA-cpxR1-15	Miyake et al, 2020 (as the cpxR_sgRNA_N20)
cpxR_psgRNA_N20_com-10	GCTATTTCTAGCTCTAAAACTCCATCTCGAGCAGCTCCTTCTGAAACCGCTGCGGCGATG	construction of psgRNA-cpxR10	This study
cpxR_psgRNA_N20-10	CATCGCCGCAGCGGTTTCAGAAGGAGCTGCTCGAGATGGAGTTTTAGAGCTAGAAATAGC	construction of psgRNA-cpxR10	This study
cpxR_psgRNA_N20_com-11	GCTATTTCTAGCTCTAAAACTCGTGGGCAACAATCACGTTCTGAAACCGCTGCGGCGATG	construction of psgRNA-cpxR11	This study
cpxR_psgRNA_N20-11	CATCGCCGCAGCGGTTTCAGAACGTGATTGTTGCCCACGAGTTTTAGAGCTAGAAATAGC	construction of psgRNA-cpxR11	This study
cpxR_psgRNA_N20_com-12	GCTATTTCTAGCTCTAAAACATCGTGGGCAACAATCACGTCTGAAACCGCTGCGGCGATG	construction of psgRNA-cpxR12	This study
cpxR_psgRNA_N20-12	CATCGCCGCAGCGGTTTCAGACGTGATTGTTGCCCACGATGTTTTAGAGCTAGAAATAGC	construction of psgRNA-cpxR12	This study
cpxR_psgRNA_N20_com-13	GCTATTTCTAGCTCTAAAACCATCGTGGGCAACAATCACGCTGAAACCGCTGCGGCGATG	construction of psgRNA-cpxR13	This study
cpxR_psgRNA_N20-13	CATCGCCGCAGCGGTTTCAGCGTGATTGTTGCCCACGATGGTTTTAGAGCTAGAAATAGC	construction of psgRNA-cpxR13	This study
cpxR_psgRNA_N20_com-14	GCTATTTCTAGCTCTAAAACGTTCCCCATCGTGGGCAACACTGAAACCGCTGCGGCGATG	construction of psgRNA-cpxR14	This study
cpxR_psgRNA_N20-14	CATCGCCGCAGCGGTTTCAGTGTTGCCCACGATGGGGAACGTTTTAGAGCTAGAAATAGC	construction of psgRNA-cpxR14	This study
cpxR_psgRNA_N20_com-15	GCTATTTCTAGCTCTAAAACACGATGGGGAACAGGCGCTTCTGAAACCGCTGCGGCGATG	construction of psgRNA-cpxR15	This study
cpxR_psgRNA_N20-15	CATCGCCGCAGCGGTTTCAGAAGCGCCTGTTCCCCATCGTGTTTTAGAGCTAGAAATAGC	construction of psgRNA-cpxR15	This study
cpxR_psgRNA_N20_com-16	GCTATTTCTAGCTCTAAAACCGATGGGGAACAGGCGCTTGCTGAAACCGCTGCGGCGATG	construction of psgRNA-cpxR16	This study
cpxR_psgRNA_N20-16	CATCGCCGCAGCGGTTTCAGCAAGCGCCTGTTCCCCATCGGTTTTAGAGCTAGAAATAGC	construction of psgRNA-cpxR16	This study
cpxR_psgRNA_N20_com-17	GCTATTTCTAGCTCTAAAACGAAGATCAAGCGCCTGTTCCCTGAAACCGCTGCGGCGATG	construction of psgRNA-cpxR17	This study
cpxR_psgRNA_N20-17	CATCGCCGCAGCGGTTTCAGGGAACAGGCGCTTGATCTTCGTTTTAGAGCTAGAAATAGC	construction of psgRNA-cpxR17	This study
cpxR_sgRNA_com-2	TTCTAGCTCTAAAACTTTTTCTTCGGCATCATTACCTGAAACCGCTGCGG	construction of psgRNA-cpxR2-12	This study
cpxR_sgRNA_N20-2	CCGCAGCGGTTTCAGGTAATGATGCCGAAGAAAAAGTTTTAGAGCTAGAA	construction of psgRNA-cpxR2-12	This study
cpxR_sgRNA_com-3	TTCTAGCTCTAAAACGACGCCTGTCATTATGTTGACTGAAACCGCTGCGG	construction of psgRNA-cpxR3-8	This study
cpxR_sgRNA_N20-3	CCGCAGCGGTTTCAGTCAACATAATGACAGGCGTCGTTTTAGAGCTAGAA	construction of psgRNA-cpxR3-8	This study
cpxR_psgRNA_N20_com-04	GCTATTTCTAGCTCTAAAACAAGAAAAATGGTATCGACACCTGAAACCGCTGCGGCGATG	construction of psgRNA-cpxR4	This study
cpxR_psgRNA_N20-04	CATCGCCGCAGCGGTTTCAGGTGTCGATACCATTTTTCTTGTTTTAGAGCTAGAAATAGC	construction of psgRNA-cpxR4	This study
cpxR_psgRNA_N20_com-05	GCTATTTCTAGCTCTAAAACGACACACCAGACGCCTGTCACTGAAACCGCTGCGGCGATG	construction of psgRNA-cpxR5	This study
cpxR_psgRNA_N20-05	CATCGCCGCAGCGGTTTCAGTGACAGGCGTCTGGTGTGTCGTTTTAGAGCTAGAAATAGC	construction of psgRNA-cpxR5	This study
cpxR_psgRNA_N20_com-06	GCTATTTCTAGCTCTAAAACTTAATAGGGAAGTCAGCTCTCTGAAACCGCTGCGGCGATG	construction of psgRNA-cpxR6	This study
cpxR_psgRNA_N20-06	CATCGCCGCAGCGGTTTCAGAGAGCTGACTTCCCTATTAAGTTTTAGAGCTAGAAATAGC	construction of psgRNA-cpxR6	This study
cpxR_psgRNA_N20_com-07	GCTATTTCTAGCTCTAAAACTATTAAAGGAGCTGCTCGAGCTGAAACCGCTGCGGCGATG	construction of psgRNA-cpxR7	This study
cpxR_psgRNA_N20-07	CATCGCCGCAGCGGTTTCAGCTCGAGCAGCTCCTTTAATAGTTTTAGAGCTAGAAATAGC	construction of psgRNA-cpxR7	This study
cpxR_psgRNA_N20_com-08	GCTATTTCTAGCTCTAAAACATTAAAGGAGCTGCTCGAGACTGAAACCGCTGCGGCGATG	construction of psgRNA-cpxR8	This study
cpxR_psgRNA_N20-08	CATCGCCGCAGCGGTTTCAGTCTCGAGCAGCTCCTTTAATGTTTTAGAGCTAGAAATAGC	construction of psgRNA-cpxR8	This study
cpxR_psgRNA_N20_com-09	GCTATTTCTAGCTCTAAAACTCTCGAGCAGCTCCTTTAATCTGAAACCGCTGCGGCGATG	construction of psgRNA-cpxR9	This study
cpxR_psgRNA_N20-09	CATCGCCGCAGCGGTTTCAGATTAAAGGAGCTGCTCGAGAGTTTTAGAGCTAGAAATAGC	construction of psgRNA-cpxR9	This study
cra_sgRNA_com-1	TTCTAGCTCTAAAACCGACACTCCCGCCAGCCGAGCTGAAACCGCTGCGG	construction of psgRNA-cra1	This study
cra_sgRNA_N20-1	CCGCAGCGGTTTCAGCTCGGCTGGCGGGAGTGTCGGTTTTAGAGCTAGAA	construction of psgRNA-cra1	This study
cra_sgRNA_com-2	TTCTAGCTCTAAAACCTGCAAGCTATGTTATTAACCTGAAACCGCTGCGG	construction of psgRNA-cra2-13	This study
cra_sgRNA_N20-2	CCGCAGCGGTTTCAGGTTAATAACATAGCTTGCAGGTTTTAGAGCTAGAA	construction of psgRNA-cra2-13	This study
cra_sgRNA_com-3	TTCTAGCTCTAAAACTGACTTTTTCAACGGTTTTGCTGAAACCGCTGCGG	construction of psgRNA-cra3	This study
cra_sgRNA_N20-3	CCGCAGCGGTTTCAGCAAAACCGTTGAAAAAGTCAGTTTTAGAGCTAGAA	construction of psgRNA-cra3	This study
creB_sgRNA_com-1	TTCTAGCTCTAAAACTGCTCATCTTCCACTAACCACTGAAACCGCTGCGG	construction of psgRNA-creB1-1	This study
creB_sgRNA_N20-1	CCGCAGCGGTTTCAGTGGTTAGTGGAAGATGAGCAGTTTTAGAGCTAGAA	construction of psgRNA-creB1-1	This study
creB_sgRNA_com-2	TTCTAGCTCTAAAACTTGCTCATCTTCCACTAACCCTGAAACCGCTGCGG	construction of psgRNA-creB2-4	This study
creB_sgRNA_N20-2	CCGCAGCGGTTTCAGGGTTAGTGGAAGATGAGCAAGTTTTAGAGCTAGAA	construction of psgRNA-creB2-4	This study
creB_sgRNA_com-3	TTCTAGCTCTAAAACGCGTGTCGGCTATCCCTTGCCTGAAACCGCTGCGG	construction of psgRNA-creB3-1	Miyake et al, 2020 (as the creB_sgRNA_com)
creB_sgRNA_N20-3	CCGCAGCGGTTTCAGGCAAGGGATAGCCGACACGCGTTTTAGAGCTAGAA	construction of psgRNA-creB3-1	Miyake et al, 2020 (as the creB_sgRNA_N20)
creC_sgRNA_com-1	TTCTAGCTCTAAAACGGCTGCCACCGCCACCAGTACTGAAACCGCTGCGG	construction of psgRNA-creC1-1	This study
creC_sgRNA_N20-1	CCGCAGCGGTTTCAGTACTGGTGGCGGTGGCAGCCGTTTTAGAGCTAGAA	construction of psgRNA-creC1-1	This study
creC_sgRNA_com-2	TTCTAGCTCTAAAACGTACGAACCAGGCTGCCACCCTGAAACCGCTGCGG	construction of psgRNA-creC2-1	This study
creC_sgRNA_N20-2	CCGCAGCGGTTTCAGGGTGGCAGCCTGGTTCGTACGTTTTAGAGCTAGAA	construction of psgRNA-creC2-1	This study
creC_sgRNA_com-3	TTCTAGCTCTAAAACGGTTCGTACTGGCCATTTTTCTGAAACCGCTGCGG	construction of psgRNA-creC3-1	This study
creC_sgRNA_N20-3	CCGCAGCGGTTTCAGAAAAATGGCCAGTACGAACCGTTTTAGAGCTAGAA	construction of psgRNA-creC3-1	This study
creC_sgRNA_com-4	TTCTAGCTCTAAAACTTTTTGTCAAAGAAGTTAAACTGAAACCGCTGCGG	construction of psgRNA-creC4-2	This study
creC_sgRNA_N20-4	CCGCAGCGGTTTCAGTTTAACTTCTTTGACAAAAAGTTTTAGAGCTAGAA	construction of psgRNA-creC4-2	This study
creC_sgRNA_com-5	TTCTAGCTCTAAAACGGTTTAACTTCTTTGACAAACTGAAACCGCTGCGG	construction of psgRNA-creC5-9	This study
creC_sgRNA_N20-5	CCGCAGCGGTTTCAGTTTGTCAAAGAAGTTAAACCGTTTTAGAGCTAGAA	construction of psgRNA-creC5-9	This study
crp_sgRNA_com-1	TTCTAGCTCTAAAACTTCGAGAGTCGGGTCTGTTTCTGAAACCGCTGCGG	construction of psgRNA-crp1-65	This study
crp_sgRNA_N20-1	CCGCAGCGGTTTCAGAAACAGACCCGACTCTCGAAGTTTTAGAGCTAGAA	construction of psgRNA-crp1-65	This study
crp_sgRNA_com-2	TTCTAGCTCTAAAACGACTCTCGAATGGTTCTTGTCTGAAACCGCTGCGG	construction of psgRNA-crp2-9	This study
crp_sgRNA_N20-2	CCGCAGCGGTTTCAGACAAGAACCATTCGAGAGTCGTTTTAGAGCTAGAA	construction of psgRNA-crp2-9	This study
crp_sgRNA_com-3	TTCTAGCTCTAAAACACTCTCGAATGGTTCTTGTCCTGAAACCGCTGCGG	construction of psgRNA-crp3-40	This study
crp_sgRNA_N20-3	CCGCAGCGGTTTCAGGACAAGAACCATTCGAGAGTGTTTTAGAGCTAGAA	construction of psgRNA-crp3-40	This study
cspA_psgRNA_N20_com-01	GCTATTTCTAGCTCTAAAACGTAAAATGACTGGTATCGTACTGAAACCGCTGCGGCGATG	construction of psgRNA-cspA1-1	This study
cspA_psgRNA_N20-01	CATCGCCGCAGCGGTTTCAGTACGATACCAGTCATTTTACGTTTTAGAGCTAGAAATAGC	construction of psgRNA-cspA1-1	This study
cspA_psgRNA_N20_com-10	GCTATTTCTAGCTCTAAAACGGCAGCTGGTAACGTAACCACTGAAACCGCTGCGGCGATG	construction of psgRNA-cspA10	This study
cspA_psgRNA_N20-10	CATCGCCGCAGCGGTTTCAGTGGTTACGTTACCAGCTGCCGTTTTAGAGCTAGAAATAGC	construction of psgRNA-cspA10	This study
cspA_psgRNA_N20_com-02	GCTATTTCTAGCTCTAAAACAAGCCTTTGTCAGCGTTGAACTGAAACCGCTGCGGCGATG	construction of psgRNA-cspA2-1	This study
cspA_psgRNA_N20-02	CATCGCCGCAGCGGTTTCAGTTCAACGCTGACAAAGGCTTGTTTTAGAGCTAGAAATAGC	construction of psgRNA-cspA2-1	This study
cspA_psgRNA_N20_com-03	GCTATTTCTAGCTCTAAAACGACGATGGCTCTAAAGATGTCTGAAACCGCTGCGGCGATG	construction of psgRNA-cspA3-1	This study
cspA_psgRNA_N20-03	CATCGCCGCAGCGGTTTCAGACATCTTTAGAGCCATCGTCGTTTTAGAGCTAGAAATAGC	construction of psgRNA-cspA3-1	This study
cspA_psgRNA_N20_com-04	GCTATTTCTAGCTCTAAAACTCGTTCTGGATAGCAGAGAACTGAAACCGCTGCGGCGATG	construction of psgRNA-cspA4-1	This study
cspA_psgRNA_N20-04	CATCGCCGCAGCGGTTTCAGTTCTCTGCTATCCAGAACGAGTTTTAGAGCTAGAAATAGC	construction of psgRNA-cspA4-1	This study
cspA_psgRNA_N20_com-05	GCTATTTCTAGCTCTAAAACGAACGATGGTTACAAATCTCCTGAAACCGCTGCGGCGATG	construction of psgRNA-cspA5-2	This study
cspA_psgRNA_N20-05	CATCGCCGCAGCGGTTTCAGGAGATTTGTAACCATCGTTCGTTTTAGAGCTAGAAATAGC	construction of psgRNA-cspA5-2	This study
cspA_psgRNA_N20_com-06	GCTATTTCTAGCTCTAAAACTCGTCCAGAGATTTGTAACCCTGAAACCGCTGCGGCGATG	construction of psgRNA-cspA6-1	This study
cspA_psgRNA_N20-06	CATCGCCGCAGCGGTTTCAGGGTTACAAATCTCTGGACGAGTTTTAGAGCTAGAAATAGC	construction of psgRNA-cspA6-1	This study
cspA_psgRNA_N20_com-07	GCTATTTCTAGCTCTAAAACCTTTCGATGGTGAAGGACACCTGAAACCGCTGCGGCGATG	construction of psgRNA-cspA7-2	This study
cspA_psgRNA_N20-07	CATCGCCGCAGCGGTTTCAGGTGTCCTTCACCATCGAAAGGTTTTAGAGCTAGAAATAGC	construction of psgRNA-cspA7-2	This study
cspA_psgRNA_N20_com-08	GCTATTTCTAGCTCTAAAACTTAGCGCCGCTTTCGATGGTCTGAAACCGCTGCGGCGATG	construction of psgRNA-cspA8-2	This study
cspA_psgRNA_N20-08	CATCGCCGCAGCGGTTTCAGACCATCGAAAGCGGCGCTAAGTTTTAGAGCTAGAAATAGC	construction of psgRNA-cspA8-2	This study
cspA_psgRNA_N20_com-09	GCTATTTCTAGCTCTAAAACGCTGCCGGGCCTTTAGCGCCCTGAAACCGCTGCGGCGATG	construction of psgRNA-cspA9	This study
cspA_psgRNA_N20-09	CATCGCCGCAGCGGTTTCAGGGCGCTAAAGGCCCGGCAGCGTTTTAGAGCTAGAAATAGC	construction of psgRNA-cspA9	This study
cueR_psgRNA_N20_com-01	GCTATTTCTAGCTCTAAAACGACCAGCAAAGCCATTCGCTCTGAAACCGCTGCGGCGATG	construction of psgRNA-cueR1	This study
cueR_psgRNA_N20-01	CATCGCCGCAGCGGTTTCAGAGCGAATGGCTTTGCTGGTCGTTTTAGAGCTAGAAATAGC	construction of psgRNA-cueR1	This study
cueR_psgRNA_N20_com-02	GCTATTTCTAGCTCTAAAACTTCGCTTCTATGAAGAGAAGCTGAAACCGCTGCGGCGATG	construction of psgRNA-cueR2	This study
cueR_psgRNA_N20-02	CATCGCCGCAGCGGTTTCAGCTTCTCTTCATAGAAGCGAAGTTTTAGAGCTAGAAATAGC	construction of psgRNA-cueR2	This study
cueR_psgRNA_N20_com-03	GCTATTTCTAGCTCTAAAACTTCTCTTCATAGAAGCGAATCTGAAACCGCTGCGGCGATG	construction of psgRNA-cueR3	This study
cueR_psgRNA_N20-03	CATCGCCGCAGCGGTTTCAGATTCGCTTCTATGAAGAGAAGTTTTAGAGCTAGAAATAGC	construction of psgRNA-cueR3	This study
cusA_sgRNA_com_1	TTCTAGCTCTAAAACGATGCTCAGAAACAACGCGCCTGAAACCGCTGCGG	construction of psgRNA-cusA1-7	This study
cusA_sgRNA_N20_1	CCGCAGCGGTTTCAGGCGCGTTGTTTCTGAGCATCGTTTTAGAGCTAGAA	construction of psgRNA-cusA1-7	This study
cusA_sgRNA_com_2	TTCTAGCTCTAAAACAGATGCTCAGAAACAACGCGCTGAAACCGCTGCGG	construction of psgRNA-cusA2-6	This study
cusA_sgRNA_N20_2	CCGCAGCGGTTTCAGCGCGTTGTTTCTGAGCATCTGTTTTAGAGCTAGAA	construction of psgRNA-cusA2-6	This study
cusA_sgRNA_com_3	TTCTAGCTCTAAAACGGTGCCCCAGATGCTCAGAACTGAAACCGCTGCGG	construction of psgRNA-cusA3-3	This study
cusA_sgRNA_N20_3	CCGCAGCGGTTTCAGTTCTGAGCATCTGGGGCACCGTTTTAGAGCTAGAA	construction of psgRNA-cusA3-3	This study
cusR_sgRNA_com-1	TTCTAGCTCTAAAACGTTTTCTTTTCATCTTCGACCTGAAACCGCTGCGG	construction of psgRNA-cusR1-25	This study
cusR_sgRNA_N20-1	CCGCAGCGGTTTCAGGTCGAAGATGAAAAGAAAACGTTTTAGAGCTAGAA	construction of psgRNA-cusR1-25	This study
cusR_psgRNA_N20_com-10	GCTATTTCTAGCTCTAAAACAAGGGTTAACCGAAGCCGGTCTGAAACCGCTGCGGCGATG	construction of psgRNA-cusR10	This study
cusR_psgRNA_N20-10	CATCGCCGCAGCGGTTTCAGACCGGCTTCGGTTAACCCTTGTTTTAGAGCTAGAAATAGC	construction of psgRNA-cusR10	This study
cusR_psgRNA_N20_com-11	GCTATTTCTAGCTCTAAAACCAAAACCGGCTTCGGTTAACCTGAAACCGCTGCGGCGATG	construction of psgRNA-cusR11	This study
cusR_psgRNA_N20-11	CATCGCCGCAGCGGTTTCAGGTTAACCGAAGCCGGTTTTGGTTTTAGAGCTAGAAATAGC	construction of psgRNA-cusR11	This study
cusR_psgRNA_N20_com-12	GCTATTTCTAGCTCTAAAACAAGCCGGTTTTGTGGTCGATCTGAAACCGCTGCGGCGATG	construction of psgRNA-cusR12	This study
cusR_psgRNA_N20-12	CATCGCCGCAGCGGTTTCAGATCGACCACAAAACCGGCTTGTTTTAGAGCTAGAAATAGC	construction of psgRNA-cusR12	This study
cusR_psgRNA_N20_com-13	GCTATTTCTAGCTCTAAAACAATCGACCACAAAACCGGCTCTGAAACCGCTGCGGCGATG	construction of psgRNA-cusR13	This study
cusR_psgRNA_N20-13	CATCGCCGCAGCGGTTTCAGAGCCGGTTTTGTGGTCGATTGTTTTAGAGCTAGAAATAGC	construction of psgRNA-cusR13	This study
cusR_psgRNA_N20_com-14	GCTATTTCTAGCTCTAAAACGTTTTGTGGTCGATTTGGCCCTGAAACCGCTGCGGCGATG	construction of psgRNA-cusR14	This study
cusR_psgRNA_N20-14	CATCGCCGCAGCGGTTTCAGGGCCAAATCGACCACAAAACGTTTTAGAGCTAGAAATAGC	construction of psgRNA-cusR14	This study
cusR_psgRNA_N20_com-15	GCTATTTCTAGCTCTAAAACTTGTCGGCCAAATCGACCACCTGAAACCGCTGCGGCGATG	construction of psgRNA-cusR15	This study
cusR_psgRNA_N20-15	CATCGCCGCAGCGGTTTCAGGTGGTCGATTTGGCCGACAAGTTTTAGAGCTAGAAATAGC	construction of psgRNA-cusR15	This study
cusR_sgRNA_com-2	TTCTAGCTCTAAAACTTGGTCAAGTATTCTCCGGTCTGAAACCGCTGCGG	construction of psgRNA-cusR2-2	Miyake et al, 2020 (as the cusR_sgRNA_com)
cusR_sgRNA_N20-2	CCGCAGCGGTTTCAGACCGGAGAATACTTGACCAAGTTTTAGAGCTAGAA	construction of psgRNA-cusR2-2	Miyake et al., 2020 (as the cusR_sgRNA_N20)
cusR_sgRNA_com-3	TTCTAGCTCTAAAACTTTGGTCAAGTATTCTCCGGCTGAAACCGCTGCGG	construction of psgRNA-cusR3-28	This study
cusR_sgRNA_N20-3	CCGCAGCGGTTTCAGCCGGAGAATACTTGACCAAAGTTTTAGAGCTAGAA	construction of psgRNA-cusR3-28	This study
cusR_psgRNA_N20_com-04	GCTATTTCTAGCTCTAAAACGCAGCATAATATCGAGGATTCTGAAACCGCTGCGGCGATG	construction of psgRNA-cusR4	This study
cusR_psgRNA_N20-04	CATCGCCGCAGCGGTTTCAGAATCCTCGATATTATGCTGCGTTTTAGAGCTAGAAATAGC	construction of psgRNA-cusR4	This study
cusR_psgRNA_N20_com-05	GCTATTTCTAGCTCTAAAACCGATATTATGCTGCCGGACGCTGAAACCGCTGCGGCGATG	construction of psgRNA-cusR5	This study
cusR_psgRNA_N20-05	CATCGCCGCAGCGGTTTCAGCGTCCGGCAGCATAATATCGGTTTTAGAGCTAGAAATAGC	construction of psgRNA-cusR5	This study
cusR_psgRNA_N20_com-06	GCTATTTCTAGCTCTAAAACTTCACGTCCGGCAGCATAATCTGAAACCGCTGCGGCGATG	construction of psgRNA-cusR6	This study
cusR_psgRNA_N20-06	CATCGCCGCAGCGGTTTCAGATTATGCTGCCGGACGTGAAGTTTTAGAGCTAGAAATAGC	construction of psgRNA-cusR6	This study
cusR_psgRNA_N20_com-07	GCTATTTCTAGCTCTAAAACGACGTGAACGGCTGGGATATCTGAAACCGCTGCGGCGATG	construction of psgRNA-cusR7	This study
cusR_psgRNA_N20-07	CATCGCCGCAGCGGTTTCAGATATCCCAGCCGTTCACGTCGTTTTAGAGCTAGAAATAGC	construction of psgRNA-cusR7	This study
cusR_psgRNA_N20_com-08	GCTATTTCTAGCTCTAAAACGAGAATACTTGACCAAAGGGCTGAAACCGCTGCGGCGATG	construction of psgRNA-cusR8	This study
cusR_psgRNA_N20-08	CATCGCCGCAGCGGTTTCAGCCCTTTGGTCAAGTATTCTCGTTTTAGAGCTAGAAATAGC	construction of psgRNA-cusR8	This study
cusR_psgRNA_N20_com-09	GCTATTTCTAGCTCTAAAACGCTTCGGTTAACCCTTTGGTCTGAAACCGCTGCGGCGATG	construction of psgRNA-cusR9	This study
cusR_psgRNA_N20-09	CATCGCCGCAGCGGTTTCAGACCAAAGGGTTAACCGAAGCGTTTTAGAGCTAGAAATAGC	construction of psgRNA-cusR9	This study
cusS_sgRNA_com-1	TTCTAGCTCTAAAACTTTTCGCTGGCAACCCGCCTCTGAAACCGCTGCGG	construction of psgRNA-cusS1-32	This study
cusS_sgRNA_N20-1	CCGCAGCGGTTTCAGAGGCGGGTTGCCAGCGAAAAGTTTTAGAGCTAGAA	construction of psgRNA-cusS1-32	This study
cusS_sgRNA_com-2	TTCTAGCTCTAAAACGCCTGACCTTTTTTATCAGCCTGAAACCGCTGCGG	construction of psgRNA-cusS2-21	This study
cusS_sgRNA_N20-2	CCGCAGCGGTTTCAGGCTGATAAAAAAGGTCAGGCGTTTTAGAGCTAGAA	construction of psgRNA-cusS2-21	This study
cusS_sgRNA_com-3	TTCTAGCTCTAAAACCCTGACCTTTTTTATCAGCCCTGAAACCGCTGCGG	construction of psgRNA-cusS3-14	This study
cusS_sgRNA_N20-3	CCGCAGCGGTTTCAGGGCTGATAAAAAAGGTCAGGGTTTTAGAGCTAGAA	construction of psgRNA-cusS3-14	This study
cydC_psgRNA_N20_com-01	GCTATTTCTAGCTCTAAAACGATAGGGTAGCAAAGCGCGCCTGAAACCGCTGCGGCGATG	construction of psgRNA-cydC1	This study
cydC_psgRNA_N20-01	CATCGCCGCAGCGGTTTCAGGCGCGCTTTGCTACCCTATCGTTTTAGAGCTAGAAATAGC	construction of psgRNA-cydC1	This study
cydC_psgRNA_N20_com-02	GCTATTTCTAGCTCTAAAACTATCTGGCACTGTATAAACGCTGAAACCGCTGCGGCGATG	construction of psgRNA-cydC2	This study
cydC_psgRNA_N20-02	CATCGCCGCAGCGGTTTCAGCGTTTATACAGTGCCAGATAGTTTTAGAGCTAGAAATAGC	construction of psgRNA-cydC2	This study
cydC_psgRNA_N20_com-03	GCTATTTCTAGCTCTAAAACATCTGGCACTGTATAAACGTCTGAAACCGCTGCGGCGATG	construction of psgRNA-cydC3	This study
cydC_psgRNA_N20-03	CATCGCCGCAGCGGTTTCAGACGTTTATACAGTGCCAGATGTTTTAGAGCTAGAAATAGC	construction of psgRNA-cydC3	This study
dpaA_psgRNA_N20_com-03	GCTATTTCTAGCTCTAAAACTGCGTTTCATTTGCCGGTTTCTGAAACCGCTGCGGCGATG	construction of psgRNA-dapA3-1	This study
dpaA_psgRNA_N20-03	CATCGCCGCAGCGGTTTCAGAAACCGGCAAATGAAACGCAGTTTTAGAGCTAGAAATAGC	construction of psgRNA-dapA3-1	This study
dctA_psgRNA_N20_com-01	GCTATTTCTAGCTCTAAAACCTCTGTTTAAAAGCCTTTACCTGAAACCGCTGCGGCGATG	construction of psgRNA-dctA1	This study
dctA_psgRNA_N20-01	CATCGCCGCAGCGGTTTCAGGTAAAGGCTTTTAAACAGAGGTTTTAGAGCTAGAAATAGC	construction of psgRNA-dctA1	This study
dctA_psgRNA_N20_com-02	GCTATTTCTAGCTCTAAAACGAAAGTAAAGGCTTTTAAACCTGAAACCGCTGCGGCGATG	construction of psgRNA-dctA2-1	This study
dctA_psgRNA_N20-02	CATCGCCGCAGCGGTTTCAGGTTTAAAAGCCTTTACTTTCGTTTTAGAGCTAGAAATAGC	construction of psgRNA-dctA2-1	This study
dctA_psgRNA_N20_com-03	GCTATTTCTAGCTCTAAAACTTACTTTCAGGTCCTGACAGCTGAAACCGCTGCGGCGATG	construction of psgRNA-dctA3	This study
dctA_psgRNA_N20-03	CATCGCCGCAGCGGTTTCAGCTGTCAGGACCTGAAAGTAAGTTTTAGAGCTAGAAATAGC	construction of psgRNA-dctA3	This study
dcuR_sgRNA_com-1	TTCTAGCTCTAAAACTTGCGTCGTCATCGATAATTCTGAAACCGCTGCGG	construction of psgRNA-dcuR1-1	This study
dcuR_sgRNA_N20-1	CCGCAGCGGTTTCAGAATTATCGATGACGACGCAAGTTTTAGAGCTAGAA	construction of psgRNA-dcuR1-1	This study
dcuR_sgRNA_com-2	TTCTAGCTCTAAAACCGACCATTGCGTCGTCATCGCTGAAACCGCTGCGG	construction of psgRNA-dcuR2-1	This study
dcuR_sgRNA_N20-2	CCGCAGCGGTTTCAGCGATGACGACGCAATGGTCGGTTTTAGAGCTAGAA	construction of psgRNA-dcuR2-1	This study
dcuR_sgRNA_com-3	TTCTAGCTCTAAAACATACGTAGCACAAATCCCAGCTGAAACCGCTGCGG	construction of psgRNA-dcuR3-8	This study
dcuR_sgRNA_N20-3	CCGCAGCGGTTTCAGCTGGGATTTGTGCTACGTATGTTTTAGAGCTAGAA	construction of psgRNA-dcuR3-8	This study
dcuR_sgRNA_com-4	TTCTAGCTCTAAAACGGGATTTGTGCTACGTATCGCTGAAACCGCTGCGG	construction of psgRNA-dcuR4-5	This study
dcuR_sgRNA_N20-4	CCGCAGCGGTTTCAGCGATACGTAGCACAAATCCCGTTTTAGAGCTAGAA	construction of psgRNA-dcuR4-5	This study
dcuR_sgRNA_com-5	TTCTAGCTCTAAAACCAGCATTGAAAGCCTGGGATCTGAAACCGCTGCGG	construction of psgRNA-dcuR5-2	This study
dcuR_sgRNA_N20-5	CCGCAGCGGTTTCAGATCCCAGGCTTTCAATGCTGGTTTTAGAGCTAGAA	construction of psgRNA-dcuR5-2	This study
dcuR_sgRNA_com-6	TTCTAGCTCTAAAACAGGCTTTCAATGCTGTGGAACTGAAACCGCTGCGG	construction of psgRNA-dcuR6-5	This study
dcuR_sgRNA_N20-6	CCGCAGCGGTTTCAGTTCCACAGCATTGAAAGCCTGTTTTAGAGCTAGAA	construction of psgRNA-dcuR6-5	This study
dcuR_sgRNA_com-7	TTCTAGCTCTAAAACGGCTTTCAATGCTGTGGAACCTGAAACCGCTGCGG	construction of psgRNA-dcuR7-4	This study
dcuR_sgRNA_N20-7	CCGCAGCGGTTTCAGGTTCCACAGCATTGAAAGCCGTTTTAGAGCTAGAA	construction of psgRNA-dcuR7-4	This study
dcuR_sgRNA_com-8	TTCTAGCTCTAAAACGCGTCGAGGCTGTTCCACAGCTGAAACCGCTGCGG	construction of psgRNA-dcuR8-1	This study
dcuR_sgRNA_N20-8	CCGCAGCGGTTTCAGCTGTGGAACAGCCTCGACGCGTTTTAGAGCTAGAA	construction of psgRNA-dcuR8-1	This study
dcuR_sgRNA_com-9	TTCTAGCTCTAAAACCGACGCTGGAGAAAGCCAAACTGAAACCGCTGCGG	construction of psgRNA-dcuR9-16	This study
dcuR_sgRNA_N20-9	CCGCAGCGGTTTCAGTTTGGCTTTCTCCAGCGTCGGTTTTAGAGCTAGAA	construction of psgRNA-dcuR9-16	This study
dcuS_sgRNA_com-1	TTCTAGCTCTAAAACATGAAATTGAGTACCACAGTCTGAAACCGCTGCGG	construction of psgRNA-dcuS1-1	This study
dcuS_sgRNA_N20-1	CCGCAGCGGTTTCAGACTGTGGTACTCAATTTCATGTTTTAGAGCTAGAA	construction of psgRNA-dcuS1-1	This study
dcuS_sgRNA_com-2	TTCTAGCTCTAAAACTTAAGATCACTGTGGTACTCCTGAAACCGCTGCGG	construction of psgRNA-dcuS2-2	This study
dcuS_sgRNA_N20-2	CCGCAGCGGTTTCAGGAGTACCACAGTGATCTTAAGTTTTAGAGCTAGAA	construction of psgRNA-dcuS2-2	This study
dcuS_sgRNA_com-3	TTCTAGCTCTAAAACCAGTGATCTTAATGGTCAGTCTGAAACCGCTGCGG	construction of psgRNA-dcuS3-6	This study
dcuS_sgRNA_N20-3	CCGCAGCGGTTTCAGACTGACCATTAAGATCACTGGTTTTAGAGCTAGAA	construction of psgRNA-dcuS3-6	This study
deaD_psgRNA_N20_com-01	GCTATTTCTAGCTCTAAAACCTTTTGCAGATCTGGGCCTGCTGAAACCGCTGCGGCGATG	construction of psgRNA-deaD1	This study
deaD_psgRNA_N20-01	CATCGCCGCAGCGGTTTCAGCAGGCCCAGATCTGCAAAAGGTTTTAGAGCTAGAAATAGC	construction of psgRNA-deaD1	This study
deaD_psgRNA_N20_com-02	GCTATTTCTAGCTCTAAAACGAAGGCTCCTATCCTTGAAGCTGAAACCGCTGCGGCGATG	construction of psgRNA-deaD2	This study
deaD_psgRNA_N20-02	CATCGCCGCAGCGGTTTCAGCTTCAAGGATAGGAGCCTTCGTTTTAGAGCTAGAAATAGC	construction of psgRNA-deaD2	This study
deaD_psgRNA_N20_com-03	GCTATTTCTAGCTCTAAAACATCCTTGAAGCCCTTAACGACTGAAACCGCTGCGGCGATG	construction of psgRNA-deaD3	This study
deaD_psgRNA_N20-03	CATCGCCGCAGCGGTTTCAGTCGTTAAGGGCTTCAAGGATGTTTTAGAGCTAGAAATAGC	construction of psgRNA-deaD3	This study
deaD_psgRNA_N20_com-04	GCTATTTCTAGCTCTAAAACGATCGTTAAGGGCTTCAAGGCTGAAACCGCTGCGGCGATG	construction of psgRNA-deaD4	This study
deaD_psgRNA_N20-04	CATCGCCGCAGCGGTTTCAGCCTTGAAGCCCTTAACGATCGTTTTAGAGCTAGAAATAGC	construction of psgRNA-deaD4	This study
deaD_psgRNA_N20_com-05	GCTATTTCTAGCTCTAAAACTGAAGCCCTTAACGATCTGGCTGAAACCGCTGCGGCGATG	construction of psgRNA-deaD5	This study
deaD_psgRNA_N20-05	CATCGCCGCAGCGGTTTCAGCCAGATCGTTAAGGGCTTCAGTTTTAGAGCTAGAAATAGC	construction of psgRNA-deaD5	This study
deaD_psgRNA_N20_com-06	GCTATTTCTAGCTCTAAAACAGATCGTTAAGGGCTTCAAGCTGAAACCGCTGCGGCGATG	construction of psgRNA-deaD6	This study
deaD_psgRNA_N20-06	CATCGCCGCAGCGGTTTCAGCTTGAAGCCCTTAACGATCTGTTTTAGAGCTAGAAATAGC	construction of psgRNA-deaD6	This study
dnaK_sgRNA_com-1	TTCTAGCTCTAAAACACTCTTGTGTAGCGATTATGCTGAAACCGCTGCGG	construction of psgRNA-dnaK1	This study
dnaK_sgRNA_N20-1	CCGCAGCGGTTTCAGCATAATCGCTACACAAGAGTGTTTTAGAGCTAGAA	construction of psgRNA-dnaK1	This study
dnaK_sgRNA_com-2	TTCTAGCTCTAAAACTAATCGCTACACAAGAGTTGCTGAAACCGCTGCGG	construction of psgRNA-dnaK2	This study
dnaK_sgRNA_N20-2	CCGCAGCGGTTTCAGCAACTCTTGTGTAGCGATTAGTTTTAGAGCTAGAA	construction of psgRNA-dnaK2	This study
dnaK_sgRNA_com-3	TTCTAGCTCTAAAACTCCATAATCGCTACACAAGACTGAAACCGCTGCGG	construction of psgRNA-dnaK3	This study
dnaK_sgRNA_N20-3	CCGCAGCGGTTTCAGTCTTGTGTAGCGATTATGGAGTTTTAGAGCTAGAA	construction of psgRNA-dnaK3	This study
dnaK_sgRNA_com-4	TTCTAGCTCTAAAACGCACGCGAGGAGTGGTGCCACTGAAACCGCTGCGG	construction of psgRNA-dnaK4	This study
dnaK_sgRNA_N20-4	CCGCAGCGGTTTCAGTGGCACCACTCCTCGCGTGCGTTTTAGAGCTAGAA	construction of psgRNA-dnaK4	This study
dnaK_sgRNA_com-5	TTCTAGCTCTAAAACCTCCTCGCGTGCTGGAGAACCTGAAACCGCTGCGG	construction of psgRNA-dnaK5	This study
dnaK_sgRNA_N20-5	CCGCAGCGGTTTCAGGTTCTCCAGCACGCGAGGAGGTTTTAGAGCTAGAA	construction of psgRNA-dnaK5	This study
dnaK_sgRNA_com-6	TTCTAGCTCTAAAACCGCGTGCTGGAGAACGCCGACTGAAACCGCTGCGG	construction of psgRNA-dnaK6	This study
dnaK_sgRNA_N20-6	CCGCAGCGGTTTCAGTCGGCGTTCTCCAGCACGCGGTTTTAGAGCTAGAA	construction of psgRNA-dnaK6	This study
dnaK_sgRNA_com-7	TTCTAGCTCTAAAACTCGGCGTTCTCCAGCACGCGCTGAAACCGCTGCGG	construction of psgRNA-dnaK7	This study
dnaK_sgRNA_N20-7	CCGCAGCGGTTTCAGCGCGTGCTGGAGAACGCCGAGTTTTAGAGCTAGAA	construction of psgRNA-dnaK7	This study
dnaK_sgRNA_com-8	TTCTAGCTCTAAAACAAGGCGATCGCACCACGCCTCTGAAACCGCTGCGG	construction of psgRNA-dnaK8	This study
dnaK_sgRNA_N20-8	CCGCAGCGGTTTCAGAGGCGTGGTGCGATCGCCTTGTTTTAGAGCTAGAA	construction of psgRNA-dnaK8	This study
dnaK_sgRNA_com-9	TTCTAGCTCTAAAACCGCCTTCTATCATTGCCTATCTGAAACCGCTGCGG	construction of psgRNA-dnaK9	This study
dnaK_sgRNA_N20-9	CCGCAGCGGTTTCAGATAGGCAATGATAGAAGGCGGTTTTAGAGCTAGAA	construction of psgRNA-dnaK9	This study
dpaA_psgRNA_N20_com-01	GCTATTTCTAGCTCTAAAACGCAAATGAAACGCACGGGATCTGAAACCGCTGCGGCGATG	construction of psgRNA-dpaA1	This study
dpaA_psgRNA_N20-01	CATCGCCGCAGCGGTTTCAGATCCCGTGCGTTTCATTTGCGTTTTAGAGCTAGAAATAGC	construction of psgRNA-dpaA1	This study
dpaA_psgRNA_N20_com-02	GCTATTTCTAGCTCTAAAACGTGCGTTTCATTTGCCGGTTCTGAAACCGCTGCGGCGATG	construction of psgRNA-dpaA2	This study
dpaA_psgRNA_N20-02	CATCGCCGCAGCGGTTTCAGAACCGGCAAATGAAACGCACGTTTTAGAGCTAGAAATAGC	construction of psgRNA-dpaA2	This study
dps_sgRNA_com_1	TTCTAGCTCTAAAACATCTGCTTTATACCCGCAACCTGAAACCGCTGCGG	construction of psgRNA-dps1-14	This study
dps_sgRNA_N20_1	CCGCAGCGGTTTCAGGTTGCGGGTATAAAGCAGATGTTTTAGAGCTAGAA	construction of psgRNA-dps1-14	This study
dps_sgRNA_com_2	TTCTAGCTCTAAAACGCAACGATGTCTCCGACAGCCTGAAACCGCTGCGG	construction of psgRNA-dps2-1	This study
dps_sgRNA_N20_2	CCGCAGCGGTTTCAGGCTGTCGGAGACATCGTTGCGTTTTAGAGCTAGAA	construction of psgRNA-dps2-1	This study
dps_sgRNA_com_3	TTCTAGCTCTAAAACCAACGATGTCTCCGACAGCGCTGAAACCGCTGCGG	construction of psgRNA-dps3-11	This study
dps_sgRNA_N20_3	CCGCAGCGGTTTCAGCGCTGTCGGAGACATCGTTGGTTTTAGAGCTAGAA	construction of psgRNA-dps3-11	This study
dps_sgRNA_com_4	TTCTAGCTCTAAAACGGCGATTCAGCAACTCTACTCTGAAACCGCTGCGG	construction of psgRNA-dps4-6	This study
dps_sgRNA_N20_4	CCGCAGCGGTTTCAGAGTAGAGTTGCTGAATCGCCGTTTTAGAGCTAGAA	construction of psgRNA-dps4-6	This study
dsdX_psgRNA_N20_com-01	GCTATTTCTAGCTCTAAAACTCGTGAAGTTCAAATTCCACCTGAAACCGCTGCGGCGATG	construction of psgRNA-dsdX1	This study
dsdX_psgRNA_N20-01	CATCGCCGCAGCGGTTTCAGGTGGAATTTGAACTTCACGAGTTTTAGAGCTAGAAATAGC	construction of psgRNA-dsdX1	This study
dsdX_psgRNA_N20_com-02	GCTATTTCTAGCTCTAAAACGAAACGGGTGGAATTTGAACCTGAAACCGCTGCGGCGATG	construction of psgRNA-dsdX2	This study
dsdX_psgRNA_N20-02	CATCGCCGCAGCGGTTTCAGGTTCAAATTCCACCCGTTTCGTTTTAGAGCTAGAAATAGC	construction of psgRNA-dsdX2	This study
dsdX_psgRNA_N20_com-03	GCTATTTCTAGCTCTAAAACCCCGTTTCTGGCGCTGTTGCCTGAAACCGCTGCGGCGATG	construction of psgRNA-dsdX3	This study
dsdX_psgRNA_N20-03	CATCGCCGCAGCGGTTTCAGGCAACAGCGCCAGAAACGGGGTTTTAGAGCTAGAAATAGC	construction of psgRNA-dsdX3	This study
envZ_sgRNA_com-1	TTCTAGCTCTAAAACGTACGTTATTGCTCATCGTCCTGAAACCGCTGCGG	construction of psgRNA-envZ1-1	Miyake et al, 2020 (as the envZ_sgRNA_com)
envZ_sgRNA_N20-1	CCGCAGCGGTTTCAGGACGATGAGCAATAACGTACGTTTTAGAGCTAGAA	construction of psgRNA-envZ1-1	Miyake et al, 2020 (as the envZ_sgRNA_N20)
envZ_psgRNA_N20_com-10	GCTATTTCTAGCTCTAAAACGCTCACGGTAGATCTCCCGACTGAAACCGCTGCGGCGATG	construction of psgRNA-envZ10-2	This study
envZ_psgRNA_N20-10	CATCGCCGCAGCGGTTTCAGTCGGGAGATCTACCGTGAGCGTTTTAGAGCTAGAAATAGC	construction of psgRNA-envZ10-2	This study
envZ_psgRNA_N20_com-11	GCTATTTCTAGCTCTAAAACCGTTGGAGTAGAGAGAGATCCTGAAACCGCTGCGGCGATG	construction of psgRNA-envZ11-2	This study
envZ_psgRNA_N20-11	CATCGCCGCAGCGGTTTCAGGATCTCTCTCTACTCCAACGGTTTTAGAGCTAGAAATAGC	construction of psgRNA-envZ11-2	This study
envZ_psgRNA_N20_com-12	GCTATTTCTAGCTCTAAAACACGCAGACCTGCCTCTTCGGCTGAAACCGCTGCGGCGATG	construction of psgRNA-envZ12-3	This study
envZ_psgRNA_N20-12	CATCGCCGCAGCGGTTTCAGCCGAAGAGGCAGGTCTGCGTGTTTTAGAGCTAGAAATAGC	construction of psgRNA-envZ12-3	This study
envZ_psgRNA_N20_com-13	GCTATTTCTAGCTCTAAAACGTTGCTGCGCCATCTGATGGCTGAAACCGCTGCGGCGATG	construction of psgRNA-envZ13-2	This study
envZ_psgRNA_N20-13	CATCGCCGCAGCGGTTTCAGCCATCAGATGGCGCAGCAACGTTTTAGAGCTAGAAATAGC	construction of psgRNA-envZ13-2	This study
envZ_psgRNA_N20_com-14	GCTATTTCTAGCTCTAAAACTCGGGCCGCCCAGTTGCTGCCTGAAACCGCTGCGGCGATG	construction of psgRNA-envZ14-2	This study
envZ_psgRNA_N20-14	CATCGCCGCAGCGGTTTCAGGCAGCAACTGGGCGGCCCGAGTTTTAGAGCTAGAAATAGC	construction of psgRNA-envZ14-2	This study
envZ_psgRNA_N20_com-15	GCTATTTCTAGCTCTAAAACGACGACAGGCGAACTTTTGTCTGAAACCGCTGCGGCGATG	construction of psgRNA-envZ15-2	This study
envZ_psgRNA_N20-15	CATCGCCGCAGCGGTTTCAGACAAAAGTTCGCCTGTCGTCGTTTTAGAGCTAGAAATAGC	construction of psgRNA-envZ15-2	This study
envZ_psgRNA_N20_com-16	GCTATTTCTAGCTCTAAAACGGCTGTCGCCCAATATCTGGCTGAAACCGCTGCGGCGATG	construction of psgRNA-envZ16-2	This study
envZ_psgRNA_N20-16	CATCGCCGCAGCGGTTTCAGCCAGATATTGGGCGACAGCCGTTTTAGAGCTAGAAATAGC	construction of psgRNA-envZ16-2	This study
envZ_psgRNA_N20_com-17	GCTATTTCTAGCTCTAAAACGATGAATTTCGGTCAGCGGCCTGAAACCGCTGCGGCGATG	construction of psgRNA-envZ17-2	This study
envZ_psgRNA_N20-17	CATCGCCGCAGCGGTTTCAGGCCGCTGACCGAAATTCATCGTTTTAGAGCTAGAAATAGC	construction of psgRNA-envZ17-2	This study
envZ_psgRNA_N20_com-18	GCTATTTCTAGCTCTAAAACGCGTATAGCGGAACAGCGGACTGAAACCGCTGCGGCGATG	construction of psgRNA-envZ18-2	This study
envZ_psgRNA_N20-18	CATCGCCGCAGCGGTTTCAGTCCGCTGTTCCGCTATACGCGTTTTAGAGCTAGAAATAGC	construction of psgRNA-envZ18-2	This study
envZ_psgRNA_N20_com-19	GCTATTTCTAGCTCTAAAACATCGCCAATAGCATAATCGCCTGAAACCGCTGCGGCGATG	construction of psgRNA-envZ19-4	This study
envZ_psgRNA_N20-19	CATCGCCGCAGCGGTTTCAGGCGATTATGCTATTGGCGATGTTTTAGAGCTAGAAATAGC	construction of psgRNA-envZ19-4	This study
envZ_sgRNA_com-2	TTCTAGCTCTAAAACTACGTTATTGCTCATCGTCACTGAAACCGCTGCGG	construction of psgRNA-envZ2-5	This study
envZ_sgRNA_N20-2	CCGCAGCGGTTTCAGTGACGATGAGCAATAACGTAGTTTTAGAGCTAGAA	construction of psgRNA-envZ2-5	This study
envZ_psgRNA_N20_com-20	GCTATTTCTAGCTCTAAAACCGCCCCGCCTATCGCCAATACTGAAACCGCTGCGGCGATG	construction of psgRNA-envZ20-3	This study
envZ_psgRNA_N20-20	CATCGCCGCAGCGGTTTCAGTATTGGCGATAGGCGGGGCGGTTTTAGAGCTAGAAATAGC	construction of psgRNA-envZ20-3	This study
envZ_psgRNA_N20_com-21	GCTATTTCTAGCTCTAAAACTTGGTCGATCTCGAACACGCCTGAAACCGCTGCGGCGATG	construction of psgRNA-envZ21-4	This study
envZ_psgRNA_N20-21	CATCGCCGCAGCGGTTTCAGGCGTGTTCGAGATCGACCAAGTTTTAGAGCTAGAAATAGC	construction of psgRNA-envZ21-4	This study
envZ_psgRNA_N20_com-22	GCTATTTCTAGCTCTAAAACTTTACCAACCTGCAAGGCTGCTGAAACCGCTGCGGCGATG	construction of psgRNA-envZ22-3	This study
envZ_psgRNA_N20-22	CATCGCCGCAGCGGTTTCAGCAGCCTTGCAGGTTGGTAAAGTTTTAGAGCTAGAAATAGC	construction of psgRNA-envZ22-3	This study
envZ_psgRNA_N20_com-23	GCTATTTCTAGCTCTAAAACCCGCTGCGTGAGTATGGCGCCTGAAACCGCTGCGGCGATG	construction of psgRNA-envZ23-4	This study
envZ_psgRNA_N20-23	CATCGCCGCAGCGGTTTCAGGCGCCATACTCACGCAGCGGGTTTTAGAGCTAGAAATAGC	construction of psgRNA-envZ23-4	This study
envZ_psgRNA_N20_com-24	GCTATTTCTAGCTCTAAAACGTACAAAGACGTAGCCCAGACTGAAACCGCTGCGGCGATG	construction of psgRNA-envZ24-1	This study
envZ_psgRNA_N20-24	CATCGCCGCAGCGGTTTCAGTCTGGGCTACGTCTTTGTACGTTTTAGAGCTAGAAATAGC	construction of psgRNA-envZ24-1	This study
envZ_psgRNA_N20_com-25	GCTATTTCTAGCTCTAAAACTCCGGTACAAAGACGTAGCCcTGAAACCGCTGCGGCGATG	construction of psgRNA-envZ25-1	This study
envZ_psgRNA_N20-25	CATCGCCGCAGCGGTTTCAGGGCTACGTCTTTGTACCGGAGTTTTAGAGCTAGAAATAGC	construction of psgRNA-envZ25-1	This study
envZ_psgRNA_N20_com-26	GCTATTTCTAGCTCTAAAACCATGCTTTAGAGCCGTCCGGCTGAAACCGCTGCGGCGATG	construction of psgRNA-envZ26-1	This study
envZ_psgRNA_N20-26	CATCGCCGCAGCGGTTTCAGCCGGACGGCTCTAAAGCATGGTTTTAGAGCTAGAAATAGC	construction of psgRNA-envZ26-1	This study
envZ_psgRNA_N20_com-27	GCTATTTCTAGCTCTAAAACGACGGCTCTAAAGCATGAGGCTGAAACCGCTGCGGCGATG	construction of psgRNA-envZ27-1	This study
envZ_psgRNA_N20-27	CATCGCCGCAGCGGTTTCAGCCTCATGCTTTAGAGCCGTCGTTTTAGAGCTAGAAATAGC	construction of psgRNA-envZ27-1	This study
envZ_psgRNA_N20_com-28	GCTATTTCTAGCTCTAAAACCTGCGTGAGTATGGCGCTTCCTGAAACCGCTGCGGCGATG	construction of psgRNA-envZ28-1	This study
envZ_psgRNA_N20-28	CATCGCCGCAGCGGTTTCAGGAAGCGCCATACTCACGCAGGTTTTAGAGCTAGAAATAGC	construction of psgRNA-envZ28-1	This study
envZ_psgRNA_N20_com-29	GCTATTTCTAGCTCTAAAACAAGCGCCATACTCACGCAGCCTGAAACCGCTGCGGCGATG	construction of psgRNA-envZ29-1	This study
envZ_psgRNA_N20-29	CATCGCCGCAGCGGTTTCAGGCTGCGTGAGTATGGCGCTTGTTTTAGAGCTAGAAATAGC	construction of psgRNA-envZ29-1	This study
envZ_sgRNA_com-3	TTCTAGCTCTAAAACGGCTGGCGAACAGCAAGGTGCTGAAACCGCTGCGG	construction of psgRNA-envZ3-2	This study
envZ_sgRNA_N20-3	CCGCAGCGGTTTCAGCACCTTGCTGTTCGCCAGCCGTTTTAGAGCTAGAA	construction of psgRNA-envZ3-2	This study
envZ_psgRNA_N20_com-30	GCTATTTCTAGCTCTAAAACCCGAAGCGCCATACTCACGCCTGAAACCGCTGCGGCGATG	construction of psgRNA-envZ30-1	This study
envZ_psgRNA_N20-30	CATCGCCGCAGCGGTTTCAGGCGTGAGTATGGCGCTTCGGGTTTTAGAGCTAGAAATAGC	construction of psgRNA-envZ30-1	This study
envZ_psgRNA_N20_com-31	GCTATTTCTAGCTCTAAAACTTACCCGTGCCTTTAACCATCTGAAACCGCTGCGGCGATG	construction of psgRNA-envZ31-1	This study
envZ_psgRNA_N20-31	CATCGCCGCAGCGGTTTCAGATGGTTAAAGGCACGGGTAAGTTTTAGAGCTAGAAATAGC	construction of psgRNA-envZ31-1	This study
envZ_psgRNA_N20_com-04	GCTATTTCTAGCTCTAAAACCGAAGTTCATTTGCCCGTACCTGAAACCGCTGCGGCGATG	construction of psgRNA-envZ4-4	This study
envZ_psgRNA_N20-04	CATCGCCGCAGCGGTTTCAGGTACGGGCAAATGAACTTCGGTTTTAGAGCTAGAAATAGC	construction of psgRNA-envZ4-4	This study
envZ_psgRNA_N20_com-05	GCTATTTCTAGCTCTAAAACTGCTGTTCGCCAGCCTGGTGCTGAAACCGCTGCGGCGATG	construction of psgRNA-envZ5-3	This study
envZ_psgRNA_N20-05	CATCGCCGCAGCGGTTTCAGCACCAGGCTGGCGAACAGCAGTTTTAGAGCTAGAAATAGC	construction of psgRNA-envZ5-3	This study
envZ_psgRNA_N20_com-06	GCTATTTCTAGCTCTAAAACGGTGACGACTTATCTGGTGGCTGAAACCGCTGCGGCGATG	construction of psgRNA-envZ6-3	This study
envZ_psgRNA_N20-06	CATCGCCGCAGCGGTTTCAGCCACCAGATAAGTCGTCACCGTTTTAGAGCTAGAAATAGC	construction of psgRNA-envZ6-3	This study
envZ_psgRNA_N20_com-07	GCTATTTCTAGCTCTAAAACCGCGTACGAAGTGCGTATGTCTGAAACCGCTGCGGCGATG	construction of psgRNA-envZ7-3	This study
envZ_psgRNA_N20-07	CATCGCCGCAGCGGTTTCAGACATACGCACTTCGTACGCGGTTTTAGAGCTAGAAATAGC	construction of psgRNA-envZ7-3	This study
envZ_psgRNA_N20_com-08	GCTATTTCTAGCTCTAAAACTCCTCCAGTTGCAGTTTGTCCTGAAACCGCTGCGGCGATG	construction of psgRNA-envZ8-3	This study
envZ_psgRNA_N20-08	CATCGCCGCAGCGGTTTCAGGACAAACTGCAACTGGAGGAGTTTTAGAGCTAGAAATAGC	construction of psgRNA-envZ8-3	This study
envZ_psgRNA_N20_com-09	GCTATTTCTAGCTCTAAAACCCCGCTTTCCGTCGGGAGATCTGAAACCGCTGCGGCGATG	construction of psgRNA-envZ9-42	This study
envZ_psgRNA_N20-09	CATCGCCGCAGCGGTTTCAGATCTCCCGACGGAAAGCGGGGTTTTAGAGCTAGAAATAGC	construction of psgRNA-envZ9-42	This study
epmB_psgRNA_N20_com-01	GCTATTTCTAGCTCTAAAACTAAATACCCCATCCAGAGAACTGAAACCGCTGCGGCGATG	construction of psgRNA-epmB1-1	This study
epmB_psgRNA_N20-01	CATCGCCGCAGCGGTTTCAGTTCTCTGGATGGGGTATTTAGTTTTAGAGCTAGAAATAGC	construction of psgRNA-epmB1-1	This study
epmB_psgRNA_N20_com-02	GCTATTTCTAGCTCTAAAACAAATACCCCATCCAGAGAAGCTGAAACCGCTGCGGCGATG	construction of psgRNA-epmB2	This study
epmB_psgRNA_N20-02	CATCGCCGCAGCGGTTTCAGCTTCTCTGGATGGGGTATTTGTTTTAGAGCTAGAAATAGC	construction of psgRNA-epmB2	This study
epmB_psgRNA_N20_com-03	GCTATTTCTAGCTCTAAAACATCTTCTCTGGATGGGGTATCTGAAACCGCTGCGGCGATG	construction of psgRNA-epmB3-1	This study
epmB_psgRNA_N20-03	CATCGCCGCAGCGGTTTCAGATACCCCATCCAGAGAAGATGTTTTAGAGCTAGAAATAGC	construction of psgRNA-epmB3-1	This study
eutE_psgRNA_N20_com-04	GCTATTTCTAGCTCTAAAACGTTCAATATCCTGTTGATTCCTGAAACCGCTGCGGCGATG	construction of psgRNA-eutE4	This study
eutE_psgRNA_N20-04	CATCGCCGCAGCGGTTTCAGGAATCAACAGGATATTGAACGTTTTAGAGCTAGAAATAGC	construction of psgRNA-eutE4	This study
eutE_psgRNA_N20_com-05	GCTATTTCTAGCTCTAAAACCCTGTTCAATATCCTGTTGACTGAAACCGCTGCGGCGATG	construction of psgRNA-eutE5	This study
eutE_psgRNA_N20-05	CATCGCCGCAGCGGTTTCAGTCAACAGGATATTGAACAGGGTTTTAGAGCTAGAAATAGC	construction of psgRNA-eutE5	This study
eutE_psgRNA_N20_com-06	GCTATTTCTAGCTCTAAAACCTTTCACCACCTGTTCAATACTGAAACCGCTGCGGCGATG	construction of psgRNA-eutE6	This study
eutE_psgRNA_N20-06	CATCGCCGCAGCGGTTTCAGTATTGAACAGGTGGTGAAAGGTTTTAGAGCTAGAAATAGC	construction of psgRNA-eutE6	This study
eutG_psgRNA_N20_com-04	GCTATTTCTAGCTCTAAAACGAAAGAGCGCGGTCTGCAATCTGAAACCGCTGCGGCGATG	construction of psgRNA-eutG4	This study
eutG_psgRNA_N20-04	CATCGCCGCAGCGGTTTCAGATTGCAGACCGCGCTCTTTCGTTTTAGAGCTAGAAATAGC	construction of psgRNA-eutG4	This study
eutG_psgRNA_N20_com-05	GCTATTTCTAGCTCTAAAACCGCTCTTTCAGGCGTTCGATCTGAAACCGCTGCGGCGATG	construction of psgRNA-eutG5	This study
eutG_psgRNA_N20-05	CATCGCCGCAGCGGTTTCAGATCGAACGCCTGAAAGAGCGGTTTTAGAGCTAGAAATAGC	construction of psgRNA-eutG5	This study
eutG_psgRNA_N20_com-06	GCTATTTCTAGCTCTAAAACTGAATCTGCAACGGGTAAAACTGAAACCGCTGCGGCGATG	construction of psgRNA-eutG6	This study
eutG_psgRNA_N20-06	CATCGCCGCAGCGGTTTCAGTTTTACCCGTTGCAGATTCAGTTTTAGAGCTAGAAATAGC	construction of psgRNA-eutG6	This study
evgA_sgRNA_com-1	TTCTAGCTCTAAAACCTGAACGGCACTTCCGCCTTCTGAAACCGCTGCGG	construction of psgRNA-evgA1-4	This study
evgA_sgRNA_N20-1	CCGCAGCGGTTTCAGAAGGCGGAAGTGCCGTTCAGGTTTTAGAGCTAGAA	construction of psgRNA-evgA1-4	This study
evgA_sgRNA_com-2	TTCTAGCTCTAAAACGCTGAACGGCACTTCCGCCTCTGAAACCGCTGCGG	construction of psgRNA-evgA2-7	This study
evgA_sgRNA_N20-2	CCGCAGCGGTTTCAGAGGCGGAAGTGCCGTTCAGCGTTTTAGAGCTAGAA	construction of psgRNA-evgA2-7	This study
evgA_sgRNA_com-3	TTCTAGCTCTAAAACTTCAGCGGGTGGAAACACTTCTGAAACCGCTGCGG	construction of psgRNA-evgA3-9	This study
evgA_sgRNA_N20-3	CCGCAGCGGTTTCAGCGGAAGTGCCGTTCAGCGGGGTTTTAGAGCTAGAA	construction of psgRNA-evgA3-9	This study
evgA_sgRNA_com-4	TTCTAGCTCTAAAACTTCAGCGGGTGGAAACACTTCTGAAACCGCTGCGG	construction of psgRNA-evgA4-4	This study
evgA_sgRNA_N20-4	CCGCAGCGGTTTCAGAAGTGTTTCCACCCGCTGAAGTTTTAGAGCTAGAA	construction of psgRNA-evgA4-4	This study
evgA_sgRNA_com-5	TTCTAGCTCTAAAACGGATACCGTTAACTCCGGGGCTGAAACCGCTGCGG	construction of psgRNA-evgA5-1	This study
evgA_sgRNA_N20-5	CCGCAGCGGTTTCAGCCCCGGAGTTAACGGTATCCGTTTTAGAGCTAGAA	construction of psgRNA-evgA5-1	This study
evgS_sgRNA_com-1	TTCTAGCTCTAAAACTAAGTTTCGCAGACGAAGATCTGAAACCGCTGCGG	construction of psgRNA-evgS1-31	This study
evgS_sgRNA_N20-1	CCGCAGCGGTTTCAGATCTTCGTCTGCGAAACTTAGTTTTAGAGCTAGAA	construction of psgRNA-evgS1-31	This study
evgS_sgRNA_com-2	TTCTAGCTCTAAAACCGATATTCGATGTAATCTTCCTGAAACCGCTGCGG	construction of psgRNA-evgS2-13	This study
evgS_sgRNA_N20-2	CCGCAGCGGTTTCAGGAAGATTACATCGAATATCGGTTTTAGAGCTAGAA	construction of psgRNA-evgS2-13	This study
evgS_sgRNA_com-3	TTCTAGCTCTAAAACTTGCTGCGAATCGGTATGCACTGAAACCGCTGCGG	construction of psgRNA-evgS3-4	This study
evgS_sgRNA_N20-3	CCGCAGCGGTTTCAGTGCATACCGATTCGCAGCAAGTTTTAGAGCTAGAA	construction of psgRNA-evgS3-4	This study
exbB_psgRNA_N20_com-01	GCTATTTCTAGCTCTAAAACTCTGCATTAAATTATTACCCCTGAAACCGCTGCGGCGATG	construction of psgRNA-exbB1	This study
exbB_psgRNA_N20-01	CATCGCCGCAGCGGTTTCAGGGGTAATAATTTAATGCAGAGTTTTAGAGCTAGAAATAGC	construction of psgRNA-exbB1	This study
exbB_psgRNA_N20_com-02	GCTATTTCTAGCTCTAAAACGACGGAAAGGTCCGTCTGCACTGAAACCGCTGCGGCGATG	construction of psgRNA-exbB2	This study
exbB_psgRNA_N20-02	CATCGCCGCAGCGGTTTCAGTGCAGACGGACCTTTCCGTCGTTTTAGAGCTAGAAATAGC	construction of psgRNA-exbB2	This study
exbB_psgRNA_N20_com-03	GCTATTTCTAGCTCTAAAACAGACGGAAAGGTCCGTCTGCCTGAAACCGCTGCGGCGATG	construction of psgRNA-exbB3	This study
exbB_psgRNA_N20-03	CATCGCCGCAGCGGTTTCAGGCAGACGGACCTTTCCGTCTGTTTTAGAGCTAGAAATAGC	construction of psgRNA-exbB3	This study
exbD_psgRNA_N20_com-01	GCTATTTCTAGCTCTAAAACTTATCGTCGAGGTTTTCGTTCTGAAACCGCTGCGGCGATG	construction of psgRNA-exbD1	This study
exbD_psgRNA_N20-01	CATCGCCGCAGCGGTTTCAGAACGAAAACCTCGACGATAAGTTTTAGAGCTAGAAATAGC	construction of psgRNA-exbD1	This study
exbD_psgRNA_N20_com-02	GCTATTTCTAGCTCTAAAACCGACGATAACGGCGAAATGCCTGAAACCGCTGCGGCGATG	construction of psgRNA-exbD2	This study
exbD_psgRNA_N20-02	CATCGCCGCAGCGGTTTCAGGCATTTCGCCGTTATCGTCGGTTTTAGAGCTAGAAATAGC	construction of psgRNA-exbD2	This study
exbD_psgRNA_N20_com-03	GCTATTTCTAGCTCTAAAACACATCACGTCGATAAACGGCCTGAAACCGCTGCGGCGATG	construction of psgRNA-exbD3	This study
exbD_psgRNA_N20-03	CATCGCCGCAGCGGTTTCAGGCCGTTTATCGACGTGATGTGTTTTAGAGCTAGAAATAGC	construction of psgRNA-exbD3	This study
fabZ_psgRNA_N20_com-01	GCTATTTCTAGCTCTAAAACCACCGTTTCCCGTTCTTACTCTGAAACCGCTGCGGCGATG	construction of psgRNA-fabZ1	This study
fabZ_psgRNA_N20-01	CATCGCCGCAGCGGTTTCAGAGTAAGAACGGGAAACGGTGGTTTTAGAGCTAGAAATAGC	construction of psgRNA-fabZ1	This study
fabZ_psgRNA_N20_com-02	GCTATTTCTAGCTCTAAAACGTAAGAACGGGAAACGGTGCCTGAAACCGCTGCGGCGATG	construction of psgRNA-fabZ2	This study
fabZ_psgRNA_N20-02	CATCGCCGCAGCGGTTTCAGGCACCGTTTCCCGTTCTTACGTTTTAGAGCTAGAAATAGC	construction of psgRNA-fabZ2	This study
fabZ_psgRNA_N20_com-03	GCTATTTCTAGCTCTAAAACCCAGTAAGAACGGGAAACGGCTGAAACCGCTGCGGCGATG	construction of psgRNA-fabZ3	This study
fabZ_psgRNA_N20-03	CATCGCCGCAGCGGTTTCAGCCGTTTCCCGTTCTTACTGGGTTTTAGAGCTAGAAATAGC	construction of psgRNA-fabZ3	This study
fabZ_psgRNA_N20_com-04	GCTATTTCTAGCTCTAAAACTTTCCCGTTCTTACTGGTGGCTGAAACCGCTGCGGCGATG	construction of psgRNA-fabZ4	This study
fabZ_psgRNA_N20-04	CATCGCCGCAGCGGTTTCAGCCACCAGTAAGAACGGGAAAGTTTTAGAGCTAGAAATAGC	construction of psgRNA-fabZ4	This study
fabZ_psgRNA_N20_com-05	GCTATTTCTAGCTCTAAAACGTTCTTACTGGTGGATCGCGCTGAAACCGCTGCGGCGATG	construction of psgRNA-fabZ5	This study
fabZ_psgRNA_N20-05	CATCGCCGCAGCGGTTTCAGCGCGATCCACCAGTAAGAACGTTTTAGAGCTAGAAATAGC	construction of psgRNA-fabZ5	This study
fabZ_psgRNA_N20_com-06	GCTATTTCTAGCTCTAAAACTTCTTACTGGTGGATCGCGTCTGAAACCGCTGCGGCGATG	construction of psgRNA-fabZ6	This study
fabZ_psgRNA_N20-06	CATCGCCGCAGCGGTTTCAGACGCGATCCACCAGTAAGAAGTTTTAGAGCTAGAAATAGC	construction of psgRNA-fabZ6	This study
fecI_sgRNA_com-1	TTCTAGCTCTAAAACTAAAGCGACTCGAACGTTAACTGAAACCGCTGCGG	construction of psgRNA-fecI1	This study
fecI_sgRNA_N20-1	CCGCAGCGGTTTCAGTTAACGTTCGAGTCGCTTTAGTTTTAGAGCTAGAA	construction of psgRNA-fecI1	This study
fecI_sgRNA_com-2	TTCTAGCTCTAAAACGCTTTTCAACCAGCCGTGATCTGAAACCGCTGCGG	construction of psgRNA-fecI2	This study
fecI_sgRNA_N20-2	CCGCAGCGGTTTCAGATCACGGCTGGTTGAAAAGCGTTTTAGAGCTAGAA	construction of psgRNA-fecI2	This study
fecI_sgRNA_com-3	TTCTAGCTCTAAAACGGACACTTTTTTGCGGGTAACTGAAACCGCTGCGG	construction of psgRNA-fecI3	This study
fecI_sgRNA_N20-3	CCGCAGCGGTTTCAGTTACCCGCAAAAAAGTGTCCGTTTTAGAGCTAGAA	construction of psgRNA-fecI3	This study
fecI_psgRNA_N20_com-04	GCTATTTCTAGCTCTAAAACCAGCTTCCTTAACGTTCGAGCTGAAACCGCTGCGGCGATG	construction of psgRNA-fecI4	This study
fecI_psgRNA_N20-04	CATCGCCGCAGCGGTTTCAGCTCGAACGTTAAGGAAGCTGGTTTTAGAGCTAGAAATAGC	construction of psgRNA-fecI4	This study
fecI_psgRNA_N20_com-06	GCTATTTCTAGCTCTAAAACTGATGTGTGCCATAAAGCGACTGAAACCGCTGCGGCGATG	construction of psgRNA-fecI6-1	This study
fecI_psgRNA_N20-06	CATCGCCGCAGCGGTTTCAGTCGCTTTATGGCACACATCAGTTTTAGAGCTAGAAATAGC	construction of psgRNA-fecI6-1	This study
fimZ_sgRNA_com-1	TTCTAGCTCTAAAACATCATCAGAATGTCTATTGACTGAAACCGCTGCGG	construction of psgRNA-fimZ1-1	Ogawa et al, 2022 (as the fimZ_sgRNA_N20)
fimZ_sgRNA_N20-1	CCGCAGCGGTTTCAGTCAATAGACATTCTGATGATGTTTTAGAGCTAGAA	construction of psgRNA-fimZ1-1	Ogawa et al, 2022 (as the fimZ_sgRNA_com)
fimZ_sgRNA_com-2	TTCTAGCTCTAAAACTTTTCAGGACAATCTGCAATCTGAAACCGCTGCGG	construction of psgRNA-fimZ2-1	This study
fimZ_sgRNA_N20-2	CCGCAGCGGTTTCAGATTGCAGATTGTCCTGAAAAGTTTTAGAGCTAGAA	construction of psgRNA-fimZ2-1	This study
fimZ_sgRNA_com-3	TTCTAGCTCTAAAACTCGATTATCTCCGAACCCGTCTGAAACCGCTGCGG	construction of psgRNA-fimZ3-3	This study
fimZ_sgRNA_N20-3	CCGCAGCGGTTTCAGACGGGTTCGGAGATAATCGAGTTTTAGAGCTAGAA	construction of psgRNA-fimZ3-3	This study
fimZ_psgRNA_N20_com-04	GCTATTTCTAGCTCTAAAACTAATGATTAAATCAACAGGACTGAAACCGCTGCGGCGATG	construction of psgRNA-fimZ4	This study
fimZ_psgRNA_N20-04	CATCGCCGCAGCGGTTTCAGTCCTGTTGATTTAATCATTAGTTTTAGAGCTAGAAATAGC	construction of psgRNA-fimZ4	This study
fimZ_psgRNA_N20_com-05	GCTATTTCTAGCTCTAAAACGTTGATTTAATCATTATGGACTGAAACCGCTGCGGCGATG	construction of psgRNA-fimZ5	This study
fimZ_psgRNA_N20-05	CATCGCCGCAGCGGTTTCAGTCCATAATGATTAAATCAACGTTTTAGAGCTAGAAATAGC	construction of psgRNA-fimZ5	This study
fimZ_psgRNA_N20_com-06	GCTATTTCTAGCTCTAAAACGGAACAGACGGTTTTACCTTCTGAAACCGCTGCGGCGATG	construction of psgRNA-fimZ6	This study
fimZ_psgRNA_N20-06	CATCGCCGCAGCGGTTTCAGAAGGTAAAACCGTCTGTTCCGTTTTAGAGCTAGAAATAGC	construction of psgRNA-fimZ6	This study
fimZ_psgRNA_N20_com-07	GCTATTTCTAGCTCTAAAACGAACAGACGGTTTTACCTTCCTGAAACCGCTGCGGCGATG	construction of psgRNA-fimZ7	This study
fimZ_psgRNA_N20-07	CATCGCCGCAGCGGTTTCAGGAAGGTAAAACCGTCTGTTCGTTTTAGAGCTAGAAATAGC	construction of psgRNA-fimZ7	This study
fis_sgRNA_com_1	TTCTAGCTCTAAAACTTTCTACCGTTAACTCTCAGCTGAAACCGCTGCGG	construction of psgRNA-fis1-19	This study
fis_sgRNA_N20_1	CCGCAGCGGTTTCAGCTGAGAGTTAACGGTAGAAAGTTTTAGAGCTAGAA	construction of psgRNA-fis1-19	This study
fis_sgRNA_com_2	TTCTAGCTCTAAAACGAGAGTTAACGGTAGAAACGCTGAAACCGCTGCGG	construction of psgRNA-fis2-28	This study
fis_sgRNA_N20_2	CCGCAGCGGTTTCAGCGTTTCTACCGTTAACTCTCGTTTTAGAGCTAGAA	construction of psgRNA-fis2-28	This study
fis_sgRNA_com_3	TTCTAGCTCTAAAACGATCCTGAGAGTTAACGGTACTGAAACCGCTGCGG	construction of psgRNA-fis3-11	This study
fis_sgRNA_N20_3	CCGCAGCGGTTTCAGTACCGTTAACTCTCAGGATCGTTTTAGAGCTAGAA	construction of psgRNA-fis3-11	This study
fucI_psgRNA_N20_com-01	GCTATTTCTAGCTCTAAAACATTTTCGGTAAGCTGATTTTCTGAAACCGCTGCGGCGATG	construction of psgRNA-fucI1	This study
fucI_psgRNA_N20-01	CATCGCCGCAGCGGTTTCAGAAAATCAGCTTACCGAAAATGTTTTAGAGCTAGAAATAGC	construction of psgRNA-fucI1	This study
fucI_psgRNA_N20_com-02	GCTATTTCTAGCTCTAAAACGGCGGATACCAATTTTCGGTCTGAAACCGCTGCGGCGATG	construction of psgRNA-fucI2-2	This study
fucI_psgRNA_N20-02	CATCGCCGCAGCGGTTTCAGACCGAAAATTGGTATCCGCCGTTTTAGAGCTAGAAATAGC	construction of psgRNA-fucI2-2	This study
fucI_psgRNA_N20_com-03	GCTATTTCTAGCTCTAAAACAAAATTGGTATCCGCCCGGTCTGAAACCGCTGCGGCGATG	construction of psgRNA-fucI3	This study
fucI_psgRNA_N20-03	CATCGCCGCAGCGGTTTCAGACCGGGCGGATACCAATTTTGTTTTAGAGCTAGAAATAGC	construction of psgRNA-fucI3	This study
fucO_psgRNA_N20_com-01	GCTATTTCTAGCTCTAAAACTTTCGTTCAGAATCATTCTGCTGAAACCGCTGCGGCGATG	construction of psgRNA-fucO1-1	This study
fucO_psgRNA_N20-01	CATCGCCGCAGCGGTTTCAGCAGAATGATTCTGAACGAAAGTTTTAGAGCTAGAAATAGC	construction of psgRNA-fucO1-1	This study
fucO_psgRNA_N20_com-02	GCTATTTCTAGCTCTAAAACTGCCGTTTCGTTCAGAATCACTGAAACCGCTGCGGCGATG	construction of psgRNA-fucO2	This study
fucO_psgRNA_N20-02	CATCGCCGCAGCGGTTTCAGTGATTCTGAACGAAACGGCAGTTTTAGAGCTAGAAATAGC	construction of psgRNA-fucO2	This study
fucO_psgRNA_N20_com-03	GCTATTTCTAGCTCTAAAACAACCATGCCGTTTCGTTCAGCTGAAACCGCTGCGGCGATG	construction of psgRNA-fucO3-1	This study
fucO_psgRNA_N20-03	CATCGCCGCAGCGGTTTCAGCTGAACGAAACGGCATGGTTGTTTTAGAGCTAGAAATAGC	construction of psgRNA-fucO3-1	This study
fucR_psgRNA_N20_com-01	GCTATTTCTAGCTCTAAAACTGGTCAGGCTGGTATGGTTCCTGAAACCGCTGCGGCGATG	construction of psgRNA-fucR1	This study
fucR_psgRNA_N20-01	CATCGCCGCAGCGGTTTCAGGAACCATACCAGCCTGACCAGTTTTAGAGCTAGAAATAGC	construction of psgRNA-fucR1	This study
fucR_psgRNA_N20_com-02	GCTATTTCTAGCTCTAAAACGACCACGGAAGCTCTCTCTGCTGAAACCGCTGCGGCGATG	construction of psgRNA-fucR2	This study
fucR_psgRNA_N20-02	CATCGCCGCAGCGGTTTCAGCAGAGAGAGCTTCCGTGGTCGTTTTAGAGCTAGAAATAGC	construction of psgRNA-fucR2	This study
fucR_psgRNA_N20_com-03	GCTATTTCTAGCTCTAAAACCGGAAGCTCTCTCTGAACAGCTGAAACCGCTGCGGCGATG	construction of psgRNA-fucR3	This study
fucR_psgRNA_N20-03	CATCGCCGCAGCGGTTTCAGCTGTTCAGAGAGAGCTTCCGGTTTTAGAGCTAGAAATAGC	construction of psgRNA-fucR3	This study
fur_sgRNA_com-1	TTCTAGCTCTAAAACGAAAGTAACGCTTCCTCGTTCTGAAACCGCTGCGG	construction of psgRNA-fur1-13	This study
fur_sgRNA_N20-1	CCGCAGCGGTTTCAGAACGAGGAAGCGTTACTTTCGTTTTAGAGCTAGAA	construction of psgRNA-fur1-13	This study
fur_sgRNA_com-２	TTCTAGCTCTAAAACGGATTTTTAAACGAGGAAGCCTGAAACCGCTGCGG	construction of psgRNA-fur2	This study
fur_sgRNA_N20-２	CCGCAGCGGTTTCAGGCTTCCTCGTTTAAAAATCCGTTTTAGAGCTAGAA	construction of psgRNA-fur2	This study
fur_sgRNA_com-3	TTCTAGCTCTAAAACGAAGAACTTCCAGGATTTTTCTGAAACCGCTGCGG	construction of psgRNA-fur3-4	This study
fur_sgRNA_N20-3	CCGCAGCGGTTTCAGAAAAATCCTGGAAGTTCTTCGTTTTAGAGCTAGAA	construction of psgRNA-fur3-4	This study
gadX_psgRNA_N20_com-01	GCTATTTCTAGCTCTAAAACTTAACCATGGTGAGAATATATATAAACCGCTGCGGCGATG	construction of psgRNA-gadX1	This study
gadX_psgRNA_N20-01	CATCGCCGCAGCGGTTTCAGTATATTCTCACCATGGTTAAGTTTTAGAGCTAGAAATAGC	construction of psgRNA-gadX1	This study
gadX_psgRNA_N20_com-02	GCTATTTCTAGCTCTAAAACTGGTTAATGGTGAATATCGCCTGAAACCGCTGCGGCGATG	construction of psgRNA-gadX2	This study
gadX_psgRNA_N20-02	CATCGCCGCAGCGGTTTCAGGCGATATTCACCATTAACCAGTTTTAGAGCTAGAAATAGC	construction of psgRNA-gadX2	This study
gadX_psgRNA_N20_com-03	GCTATTTCTAGCTCTAAAACGGTCACCGCCATTAAAATAGCTGAAACCGCTGCGGCGATG	construction of psgRNA-gadX3	This study
gadX_psgRNA_N20-03	CATCGCCGCAGCGGTTTCAGCTATTTTAATGGCGGTGACCGTTTTAGAGCTAGAAATAGC	construction of psgRNA-gadX3	This study
gadX_psgRNA_N20_com-04	GCTATTTCTAGCTCTAAAACAATTCGAGTAGATAAGTGTGTATAAACCGCTGCGGCGATG	construction of psgRNA-gadX4	This study
gadX_psgRNA_N20-04	CATCGCCGCAGCGGTTTCAGCACACTTATCTACTCGAATTGTTTTAGAGCTAGAAATAGC	construction of psgRNA-gadX4	This study
gadX_psgRNA_N20_com-05	GCTATTTCTAGCTCTAAAACTTGACACGAATACAAAATTTCTGAAACCGCTGCGGCGATG	construction of psgRNA-gadX5	This study
gadX_psgRNA_N20-05	CATCGCCGCAGCGGTTTCAGAAATTTTGTATTCGTGTCAAGTTTTAGAGCTAGAAATAGC	construction of psgRNA-gadX5	This study
gadX_psgRNA_N20_com-06	GCTATTTCTAGCTCTAAAACCCTTGAGCATCGGGAGAAATCTGAAACCGCTGCGGCGATG	construction of psgRNA-gadX6	This study
gadX_psgRNA_N20-06	CATCGCCGCAGCGGTTTCAGATTTCTCCCGATGCTCAAGGGTTTTAGAGCTAGAAATAGC	construction of psgRNA-gadX6	This study
glf_psgRNA_N20_com-01	GCTATTTCTAGCTCTAAAACACAATGATATAATCGTACATCTGAAACCGCTGCGGCGATG	construction of psgRNA-glf1-1	This study
glf_psgRNA_N20-01	CATCGCCGCAGCGGTTTCAGATGTACGATTATATCATTGTGTTTTAGAGCTAGAAATAGC	construction of psgRNA-glf1-1	This study
glf_psgRNA_N20_com-02	GCTATTTCTAGCTCTAAAACGAACCAACAATGATATAATCCTGAAACCGCTGCGGCGATG	construction of psgRNA-glf2-1	This study
glf_psgRNA_N20-02	CATCGCCGCAGCGGTTTCAGGATTATATCATTGTTGGTTCGTTTTAGAGCTAGAAATAGC	construction of psgRNA-glf2-1	This study
glf_psgRNA_N20_com-03	GCTATTTCTAGCTCTAAAACAACAAACCAGAACCAACAATCTGAAACCGCTGCGGCGATG	construction of psgRNA-glf3-2	This study
glf_psgRNA_N20-03	CATCGCCGCAGCGGTTTCAGATTGTTGGTTCTGGTTTGTTGTTTTAGAGCTAGAAATAGC	construction of psgRNA-glf3-2	This study
glf_psgRNA_N20_com-04	GCTATTTCTAGCTCTAAAACTTTGTGCGAATGAGTTAAAACTGAAACCGCTGCGGCGATG	construction of psgRNA-glf4-1	This study
glf_psgRNA_N20-04	CATCGCCGCAGCGGTTTCAGTTTTAACTCATTCGCACAAAGTTTTAGAGCTAGAAATAGC	construction of psgRNA-glf4-1	This study
glpD_psgRNA_N20_com-01	GCTATTTCTAGCTCTAAAACATCACAATCAGATCTTTGGTCTGAAACCGCTGCGGCGATG	construction of psgRNA-glpD1	This study
glpD_psgRNA_N20-01	CATCGCCGCAGCGGTTTCAGACCAAAGATCTGATTGTGATGTTTTAGAGCTAGAAATAGC	construction of psgRNA-glpD1	This study
glpD_psgRNA_N20_com-02	GCTATTTCTAGCTCTAAAACTATCACAATCAGATCTTTGGCTGAAACCGCTGCGGCGATG	construction of psgRNA-glpD2	This study
glpD_psgRNA_N20-02	CATCGCCGCAGCGGTTTCAGCCAAAGATCTGATTGTGATAGTTTTAGAGCTAGAAATAGC	construction of psgRNA-glpD2	This study
glpD_psgRNA_N20_com-03	GCTATTTCTAGCTCTAAAACAAGATCTGATTGTGATAGGGCTGAAACCGCTGCGGCGATG	construction of psgRNA-glpD3	This study
glpD_psgRNA_N20-03	CATCGCCGCAGCGGTTTCAGCCCTATCACAATCAGATCTTGTTTTAGAGCTAGAAATAGC	construction of psgRNA-glpD3	This study
glrK_sgRNA_com-1	TTCTAGCTCTAAAACGTTGTCGTAATGAGCGGGGACTGAAACCGCTGCGG	construction of psgRNA-glrK1-1	This study
glrK_sgRNA_N20-1	CCGCAGCGGTTTCAGTCCCCGCTCATTACGACAACGTTTTAGAGCTAGAA	construction of psgRNA-glrK1-1	This study
glrK_sgRNA_com-2	TTCTAGCTCTAAAACGCATTACCAGTTGTCGTAATCTGAAACCGCTGCGG	construction of psgRNA-glrK2-1	This study
glrK_sgRNA_N20-2	CCGCAGCGGTTTCAGATTACGACAACTGGTAATGCGTTTTAGAGCTAGAA	construction of psgRNA-glrK2-1	This study
glrK_sgRNA_com-3	TTCTAGCTCTAAAACACAGGGGCAGCAGAATCAGCCTGAAACCGCTGCGG	construction of psgRNA-glrK3-2	This study
glrK_sgRNA_N20-3	CCGCAGCGGTTTCAGGCTGATTCTGCTGCCCCTGTGTTTTAGAGCTAGAA	construction of psgRNA-glrK3-2	This study
glrR_sgRNA_com-1	TTCTAGCTCTAAAACGATCGTCATCGACCAATAATCTGAAACCGCTGCGG	construction of psgRNA-glrR1-1	This study
glrR_sgRNA_N20-1	CCGCAGCGGTTTCAGATTATTGGTCGATGACGATCGTTTTAGAGCTAGAA	construction of psgRNA-glrR1-1	This study
glrR_sgRNA_com-2	TTCTAGCTCTAAAACGGATCGTCATCGACCAATAACTGAAACCGCTGCGG	construction of psgRNA-glrR2-5	This study
glrR_sgRNA_N20-2	CCGCAGCGGTTTCAGTTATTGGTCGATGACGATCCGTTTTAGAGCTAGAA	construction of psgRNA-glrR2-5	This study
glrR_sgRNA_com-3	TTCTAGCTCTAAAACAGCAGTTTCAGCAATCCCGGCTGAAACCGCTGCGG	construction of psgRNA-glrR3-4	This study
glrR_sgRNA_N20-3	CCGCAGCGGTTTCAGCCGGGATTGCTGAAACTGCTGTTTTAGAGCTAGAA	construction of psgRNA-glrR3-4	This study
gltP_psgRNA_N20_com-01	GCTATTTCTAGCTCTAAAACGGCTGAATTTTATATTTTTCCTGAAACCGCTGCGGCGATG	construction of psgRNA-gltP1	This study
gltP_psgRNA_N20-01	CATCGCCGCAGCGGTTTCAGGAAAAATATAAAATTCAGCCGTTTTAGAGCTAGAAATAGC	construction of psgRNA-gltP1	This study
gltP_psgRNA_N20_com-02	GCTATTTCTAGCTCTAAAACGGCCAGGCTGAATTTTATATCTGAAACCGCTGCGGCGATG	construction of psgRNA-gltP2	This study
gltP_psgRNA_N20-02	CATCGCCGCAGCGGTTTCAGATATAAAATTCAGCCTGGCCGTTTTAGAGCTAGAAATAGC	construction of psgRNA-gltP2	This study
gltP_psgRNA_N20_com-03	GCTATTTCTAGCTCTAAAACGGCCTGGCAGATTCTGTTTGCTGAAACCGCTGCGGCGATG	construction of psgRNA-gltP3	This study
gltP_psgRNA_N20-03	CATCGCCGCAGCGGTTTCAGCAAACAGAATCTGCCAGGCCGTTTTAGAGCTAGAAATAGC	construction of psgRNA-gltP3	This study
grcA_psgRNA_N20_com-01	GCTATTTCTAGCTCTAAAACGATTACTAAAGCCGCTAACGCTGAAACCGCTGCGGCGATG	construction of psgRNA-grcA1	This study
grcA_psgRNA_N20-01	CATCGCCGCAGCGGTTTCAGCGTTAGCGGCTTTAGTAATCGTTTTAGAGCTAGAAATAGC	construction of psgRNA-grcA1	This study
grcA_psgRNA_N20_com-02	GCTATTTCTAGCTCTAAAACCTAACGACGATCTGCTGAACCTGAAACCGCTGCGGCGATG	construction of psgRNA-grcA2	This study
grcA_psgRNA_N20-02	CATCGCCGCAGCGGTTTCAGGTTCAGCAGATCGTCGTTAGGTTTTAGAGCTAGAAATAGC	construction of psgRNA-grcA2	This study
grcA_psgRNA_N20_com-03	GCTATTTCTAGCTCTAAAACGAAAGAGTTCAGCAGATCGTCTGAAACCGCTGCGGCGATG	construction of psgRNA-grcA3	This study
grcA_psgRNA_N20-03	CATCGCCGCAGCGGTTTCAGACGATCTGCTGAACTCTTTCGTTTTAGAGCTAGAAATAGC	construction of psgRNA-grcA3	This study
grxB_psgRNA_N20-01	CATCGCCGCAGCGGTTTCAGGTGAACTGACAGCCAAATGGGTTTTAGAGCTAGAAATAGC	construction of psgRNA-grxB01	This study
grxB_psgRNA_N20_com_01	GCTATTTCTAGCTCTAAAACCCATTTGGCTGTCAGTTCACCTGAAACCGCTGCGGCGATG	construction of psgRNA-grxB01	This study
grxB_psgRNA_N20-02	CATCGCCGCAGCGGTTTCAGCTTCACGTGACTCCTCCATTGTTTTAGAGCTAGAAATAGC	construction of psgRNA-grxB02	This study
grxB_psgRNA_N20_com_02	GCTATTTCTAGCTCTAAAACAATGGAGGAGTCACGTGAAGCTGAAACCGCTGCGGCGATG	construction of psgRNA-grxB02	This study
grxB_psgRNA_N20-03	CATCGCCGCAGCGGTTTCAGTGCGGGCTTTGAGGCAGTAAGTTTTAGAGCTAGAAATAGC	construction of psgRNA-grxB03	This study
grxB_psgRNA_N20_com_03	GCTATTTCTAGCTCTAAAACTTACTGCCTCAAAGCCCGCACTGAAACCGCTGCGGCGATG	construction of psgRNA-grxB03	This study
grxB_psgRNA_N20-04	CATCGCCGCAGCGGTTTCAGATGCGGGCTTTGAGGCAGTAGTTTTAGAGCTAGAAATAGC	construction of psgRNA-grxB04	This study
grxB_psgRNA_N20_com_04	GCTATTTCTAGCTCTAAAACTACTGCCTCAAAGCCCGCATCTGAAACCGCTGCGGCGATG	construction of psgRNA-grxB04	This study
grxB_psgRNA_N20-05	CATCGCCGCAGCGGTTTCAGCTCAAAGCCCGCATGATTTTGTTTTAGAGCTAGAAATAGC	construction of psgRNA-grxB05	This study
grxB_psgRNA_N20_com_05	GCTATTTCTAGCTCTAAAACAAAATCATGCGGGCTTTGAGCTGAAACCGCTGCGGCGATG	construction of psgRNA-grxB05	This study
grxB_psgRNA_N20-06	CATCGCCGCAGCGGTTTCAGTTTCAGGCCGAAAATCATGCGTTTTAGAGCTAGAAATAGC	construction of psgRNA-grxB06	This study
grxB_psgRNA_N20_com_06	GCTATTTCTAGCTCTAAAACGCATGATTTTCGGCCTGAAACTGAAACCGCTGCGGCGATG	construction of psgRNA-grxB06	This study
grxB_psgRNA_N20-07	CATCGCCGCAGCGGTTTCAGATTCGACGGGGATATTTTTCGTTTTAGAGCTAGAAATAGC	construction of psgRNA-grxB07	This study
grxB_psgRNA_N20_com_07	GCTATTTCTAGCTCTAAAACGAAAAATATCCCCGTCGAATCTGAAACCGCTGCGGCGATG	construction of psgRNA-grxB07	This study
grxB_psgRNA_N20-08	CATCGCCGCAGCGGTTTCAGGCAGAACATGTAATTCGACGGTTTTAGAGCTAGAAATAGC	construction of psgRNA-grxB08	This study
grxB_psgRNA_N20_com_08	GCTATTTCTAGCTCTAAAACCGTCGAATTACATGTTCTGCCTGAAACCGCTGCGGCGATG	construction of psgRNA-grxB08	This study
grxB_psgRNA_N20-09	CATCGCCGCAGCGGTTTCAGGAGCAGAACATGTAATTCGAGTTTTAGAGCTAGAAATAGC	construction of psgRNA-grxB09	This study
grxB_psgRNA_N20_com_09	GCTATTTCTAGCTCTAAAACTCGAATTACATGTTCTGCTCCTGAAACCGCTGCGGCGATG	construction of psgRNA-grxB09	This study
grxB_psgRNA_N20-10	CATCGCCGCAGCGGTTTCAGACGACGCAGAAACACCCACCGTTTTAGAGCTAGAAATAGC	construction of psgRNA-grxB10	This study
grxB_psgRNA_N20_com_10	GCTATTTCTAGCTCTAAAACGGTGGGTGTTTCTGCGTCGTCTGAAACCGCTGCGGCGATG	construction of psgRNA-grxB10	This study
grxB_psgRNA_N20-11	CATCGCCGCAGCGGTTTCAGGAAACACCCACCCGGATGGTGTTTTAGAGCTAGAAATAGC	construction of psgRNA-grxB11	This study
grxB_psgRNA_N20_com_11	GCTATTTCTAGCTCTAAAACACCATCCGGGTGGGTGTTTCCTGAAACCGCTGCGGCGATG	construction of psgRNA-grxB11	This study
grxB_psgRNA_N20-12	CATCGCCGCAGCGGTTTCAGTTTTGACCGACCATCCGGGTGTTTTAGAGCTAGAAATAGC	construction of psgRNA-grxB12	This study
grxB_psgRNA_N20_com_12	GCTATTTCTAGCTCTAAAACACCCGGATGGTCGGTCAAAACTGAAACCGCTGCGGCGATG	construction of psgRNA-grxB12	This study
grxB_psgRNA_N20-13	CATCGCCGCAGCGGTTTCAGCCTGTTTTTGACCGACCATCGTTTTAGAGCTAGAAATAGC	construction of psgRNA-grxB13	This study
grxB_psgRNA_N20_com_13	GCTATTTCTAGCTCTAAAACGATGGTCGGTCAAAAACAGGCTGAAACCGCTGCGGCGATG	construction of psgRNA-grxB13	This study
grxB_psgRNA_N20-14	CATCGCCGCAGCGGTTTCAGCTGTCATCTTTTTGCAGAATGTTTTAGAGCTAGAAATAGC	construction of psgRNA-grxB14	This study
grxB_psgRNA_N20_com_14	GCTATTTCTAGCTCTAAAACATTCTGCAAAAAGATGACAGCTGAAACCGCTGCGGCGATG	construction of psgRNA-grxB14	This study
grxB_psgRNA_N20-15	CATCGCCGCAGCGGTTTCAGCCGCTATATGCCAGAAAGCAGTTTTAGAGCTAGAAATAGC	construction of psgRNA-grxB15	This study
grxB_psgRNA_N20_com_15	GCTATTTCTAGCTCTAAAACTGCTTTCTGGCATATAGCGGCTGAAACCGCTGCGGCGATG	construction of psgRNA-grxB15	This study
grxB_psgRNA_N20-16	CATCGCCGCAGCGGTTTCAGCCATGCTTTCTGGCATATAGGTTTTAGAGCTAGAAATAGC	construction of psgRNA-grxB16	This study
grxB_psgRNA_N20_com_16	GCTATTTCTAGCTCTAAAACCTATATGCCAGAAAGCATGGCTGAAACCGCTGCGGCGATG	construction of psgRNA-grxB16	This study
grxB_psgRNA_N20-17	CATCGCCGCAGCGGTTTCAGTGAACGATGTCCATGCTTTCGTTTTAGAGCTAGAAATAGC	construction of psgRNA-grxB17	This study
grxB_psgRNA_N20_com_17	GCTATTTCTAGCTCTAAAACGAAAGCATGGACATCGTTCACTGAAACCGCTGCGGCGATG	construction of psgRNA-grxB17	This study
grxB_psgRNA_N20-18	CATCGCCGCAGCGGTTTCAGCACTATGTCGATAAACTCGAGTTTTAGAGCTAGAAATAGC	construction of psgRNA-grxB18	This study
grxB_psgRNA_N20_com_18	GCTATTTCTAGCTCTAAAACTCGAGTTTATCGACATAGTGCTGAAACCGCTGCGGCGATG	construction of psgRNA-grxB18	This study
grxB_psgRNA_N20-19	CATCGCCGCAGCGGTTTCAGGACGGCAAACCGTTACTGACGTTTTAGAGCTAGAAATAGC	construction of psgRNA-grxB19	This study
grxB_psgRNA_N20_com_19	GCTATTTCTAGCTCTAAAACGTCAGTAACGGTTTGCCGTCCTGAAACCGCTGCGGCGATG	construction of psgRNA-grxB19	This study
grxB_psgRNA_N20-20	CATCGCCGCAGCGGTTTCAGGAACGTTTGCCGGTCAGTAAGTTTTAGAGCTAGAAATAGC	construction of psgRNA-grxB20	This study
grxB_psgRNA_N20_com_20	GCTATTTCTAGCTCTAAAACTTACTGACCGGCAAACGTTCCTGAAACCGCTGCGGCGATG	construction of psgRNA-grxB20	This study
grxB_psgRNA_N20-21	CATCGCCGCAGCGGTTTCAGAATGGCAGGGGAACGTTTGCGTTTTAGAGCTAGAAATAGC	construction of psgRNA-grxB21	This study
grxB_psgRNA_N20_com_21	GCTATTTCTAGCTCTAAAACGCAAACGTTCCCCTGCCATTCTGAAACCGCTGCGGCGATG	construction of psgRNA-grxB21	This study
grxB_psgRNA_N20-22	CATCGCCGCAGCGGTTTCAGGTTCCCCTGCCATTGAAGAGGTTTTAGAGCTAGAAATAGC	construction of psgRNA-grxB22	This study
grxB_psgRNA_N20_com_22	GCTATTTCTAGCTCTAAAACCTCTTCAATGGCAGGGGAACCTGAAACCGCTGCGGCGATG	construction of psgRNA-grxB22	This study
grxB_psgRNA_N20-23	CATCGCCGCAGCGGTTTCAGCTTGCGCAGCCACTCTTCAAGTTTTAGAGCTAGAAATAGC	construction of psgRNA-grxB23	This study
grxB_psgRNA_N20_com_23	GCTATTTCTAGCTCTAAAACTTGAAGAGTGGCTGCGCAAGCTGAAACCGCTGCGGCGATG	construction of psgRNA-grxB23	This study
grxB_psgRNA_N20-24	CATCGCCGCAGCGGTTTCAGGAGTGGCTGCGCAAGGTCAAGTTTTAGAGCTAGAAATAGC	construction of psgRNA-grxB24	This study
grxB_psgRNA_N20_com_24	GCTATTTCTAGCTCTAAAACTTGACCTTGCGCAGCCACTCCTGAAACCGCTGCGGCGATG	construction of psgRNA-grxB24	This study
grxB_psgRNA_N20-25	CATCGCCGCAGCGGTTTCAGACGCGGCAACAGCAGTTTGTGTTTTAGAGCTAGAAATAGC	construction of psgRNA-grxB25	This study
grxB_psgRNA_N20_com_25	GCTATTTCTAGCTCTAAAACACAAACTGCTGTTGCCGCGTCTGAAACCGCTGCGGCGATG	construction of psgRNA-grxB25	This study
grxB_psgRNA_N20-26	CATCGCCGCAGCGGTTTCAGGTTGCCGCGTTTTGCCAAATGTTTTAGAGCTAGAAATAGC	construction of psgRNA-grxB26	This study
grxB_psgRNA_N20_com_26	GCTATTTCTAGCTCTAAAACATTTGGCAAAACGCGGCAACCTGAAACCGCTGCGGCGATG	construction of psgRNA-grxB26	This study
grxB_psgRNA_N20-27	CATCGCCGCAGCGGTTTCAGAATGCCGATTTGGCAAAACGGTTTTAGAGCTAGAAATAGC	construction of psgRNA-grxB27	This study
grxB_psgRNA_N20_com_27	GCTATTTCTAGCTCTAAAACCGTTTTGCCAAATCGGCATTCTGAAACCGCTGCGGCGATG	construction of psgRNA-grxB27	This study
grxB_psgRNA_N20-28	CATCGCCGCAGCGGTTTCAGACGAAATATTTGCGCGCGGCGTTTTAGAGCTAGAAATAGC	construction of psgRNA-grxB28	This study
grxB_psgRNA_N20_com_28	GCTATTTCTAGCTCTAAAACGCCGCGCGCAAATATTTCGTCTGAAACCGCTGCGGCGATG	construction of psgRNA-grxB28	This study
grxB_psgRNA_N20-29	CATCGCCGCAGCGGTTTCAGATATTTCGTCGACAAGAAAGGTTTTAGAGCTAGAAATAGC	construction of psgRNA-grxB29	This study
grxB_psgRNA_N20_com_29	GCTATTTCTAGCTCTAAAACCTTTCTTGTCGACGAAATATCTGAAACCGCTGCGGCGATG	construction of psgRNA-grxB29	This study
grxB_psgRNA_N20-30	CATCGCCGCAGCGGTTTCAGCGACAAGAAAGAGGCCAGCGGTTTTAGAGCTAGAAATAGC	construction of psgRNA-grxB30	This study
grxB_psgRNA_N20_com_30	GCTATTTCTAGCTCTAAAACCGCTGGCCTCTTTCTTGTCGCTGAAACCGCTGCGGCGATG	construction of psgRNA-grxB30	This study
grxB_psgRNA_N20-31	CATCGCCGCAGCGGTTTCAGGTCGGCAAAATTACCCGCGCGTTTTAGAGCTAGAAATAGC	construction of psgRNA-grxB31	This study
grxB_psgRNA_N20_com_31	GCTATTTCTAGCTCTAAAACGCGCGGGTAATTTTGCCGACCTGAAACCGCTGCGGCGATG	construction of psgRNA-grxB31	This study
grxB_psgRNA_N20-32	CATCGCCGCAGCGGTTTCAGGGGTAATTTTGCCGACCTGCGTTTTAGAGCTAGAAATAGC	construction of psgRNA-grxB32	This study
grxB_psgRNA_N20_com_32	GCTATTTCTAGCTCTAAAACGCAGGTCGGCAAAATTACCCCTGAAACCGCTGCGGCGATG	construction of psgRNA-grxB32	This study
grxB_psgRNA_N20-33	CATCGCCGCAGCGGTTTCAGGACCTGCTGGCCCACTCTGAGTTTTAGAGCTAGAAATAGC	construction of psgRNA-grxB33	This study
grxB_psgRNA_N20_com_33	GCTATTTCTAGCTCTAAAACTCAGAGTGGGCCAGCAGGTCCTGAAACCGCTGCGGCGATG	construction of psgRNA-grxB33	This study
grxB_psgRNA_N20-34	CATCGCCGCAGCGGTTTCAGGACCGTCAGAGTGGGCCAGCGTTTTAGAGCTAGAAATAGC	construction of psgRNA-grxB34	This study
grxB_psgRNA_N20_com_34	GCTATTTCTAGCTCTAAAACGCTGGCCCACTCTGACGGTCCTGAAACCGCTGCGGCGATG	construction of psgRNA-grxB34	This study
grxB_psgRNA_N20-35	CATCGCCGCAGCGGTTTCAGTCTTAATCAGACCGTCAGAGGTTTTAGAGCTAGAAATAGC	construction of psgRNA-grxB35	This study
grxB_psgRNA_N20_com_35	GCTATTTCTAGCTCTAAAACCTCTGACGGTCTGATTAAGACTGAAACCGCTGCGGCGATG	construction of psgRNA-grxB35	This study
grxB_psgRNA_N20-37	CATCGCCGCAGCGGTTTCAGGTCAAACCGAACGCCGTGAAGTTTTAGAGCTAGAAATAGC	construction of psgRNA-grxB37	This study
grxB_psgRNA_N20_com_37	GCTATTTCTAGCTCTAAAACTTCACGGCGTTCGGTTTGACCTGAAACCGCTGCGGCGATG	construction of psgRNA-grxB37	This study
grxB_psgRNA_N20-38	CATCGCCGCAGCGGTTTCAGAGTTCGCCATTCACGGCGTTGTTTTAGAGCTAGAAATAGC	construction of psgRNA-grxB38	This study
grxB_psgRNA_N20_com_38	GCTATTTCTAGCTCTAAAACAACGCCGTGAATGGCGAACTCTGAAACCGCTGCGGCGATG	construction of psgRNA-grxB38	This study
grxB_psgRNA_N20-39	CATCGCCGCAGCGGTTTCAGCGCCGTGAATGGCGAACTTTGTTTTAGAGCTAGAAATAGC	construction of psgRNA-grxB39	This study
grxB_psgRNA_N20_com_39	GCTATTTCTAGCTCTAAAACAAAGTTCGCCATTCACGGCGCTGAAACCGCTGCGGCGATG	construction of psgRNA-grxB39	This study
grxB_psgRNA_N20-40	CATCGCCGCAGCGGTTTCAGTTCCGAAAGTTCGCCATTCAGTTTTAGAGCTAGAAATAGC	construction of psgRNA-grxB40	This study
grxB_psgRNA_N20_com_40	GCTATTTCTAGCTCTAAAACTGAATGGCGAACTTTCGGAACTGAAACCGCTGCGGCGATG	construction of psgRNA-grxB40	This study
grxB_psgRNA_N20-41	CATCGCCGCAGCGGTTTCAGGCGTCAGATTACGCAGTAGCGTTTTAGAGCTAGAAATAGC	construction of psgRNA-grxB41	This study
grxB_psgRNA_N20_com_41	GCTATTTCTAGCTCTAAAACGCTACTGCGTAATCTGACGCCTGAAACCGCTGCGGCGATG	construction of psgRNA-grxB41	This study
grxB_psgRNA_N20-42	CATCGCCGCAGCGGTTTCAGCGTAATCTGACGCTGGTAGCGTTTTAGAGCTAGAAATAGC	construction of psgRNA-grxB42	This study
grxB_psgRNA_N20_com_42	GCTATTTCTAGCTCTAAAACGCTACCAGCGTCAGATTACGCTGAAACCGCTGCGGCGATG	construction of psgRNA-grxB42	This study
grxB_psgRNA_N20-43	CATCGCCGCAGCGGTTTCAGCGCTGGTAGCCGGAATTAACGTTTTAGAGCTAGAAATAGC	construction of psgRNA-grxB43	This study
grxB_psgRNA_N20_com_43	GCTATTTCTAGCTCTAAAACGTTAATTCCGGCTACCAGCGCTGAAACCGCTGCGGCGATG	construction of psgRNA-grxB43	This study
grxB_psgRNA_N20-44	CATCGCCGCAGCGGTTTCAGGCGGCTTGGCCAGTTAATTCGTTTTAGAGCTAGAAATAGC	construction of psgRNA-grxB44	This study
grxB_psgRNA_N20_com_44	GCTATTTCTAGCTCTAAAACGAATTAACTGGCCAAGCCGCCTGAAACCGCTGCGGCGATG	construction of psgRNA-grxB44	This study
grxB_psgRNA_N20-45	CATCGCCGCAGCGGTTTCAGTATCGCGGTAATCAGCAACGGTTTTAGAGCTAGAAATAGC	construction of psgRNA-grxB45	This study
grxB_psgRNA_N20_com_45	GCTATTTCTAGCTCTAAAACCGTTGCTGATTACCGCGATACTGAAACCGCTGCGGCGATG	construction of psgRNA-grxB45	This study
grxB_psgRNA_N20-46	CATCGCCGCAGCGGTTTCAGTGCTGATTACCGCGATAATAGTTTTAGAGCTAGAAATAGC	construction of psgRNA-grxB46	This study
grxB_psgRNA_N20_com_46	GCTATTTCTAGCTCTAAAACTATTATCGCGGTAATCAGCACTGAAACCGCTGCGGCGATG	construction of psgRNA-grxB46	This study
grxB_psgRNA_N20-47	CATCGCCGCAGCGGTTTCAGTCTGTTTCGCCATATTATCGGTTTTAGAGCTAGAAATAGC	construction of psgRNA-grxB47	This study
grxB_psgRNA_N20_com_47	GCTATTTCTAGCTCTAAAACCGATAATATGGCGAAACAGACTGAAACCGCTGCGGCGATG	construction of psgRNA-grxB47	This study
grxB_psgRNA_N20-48	CATCGCCGCAGCGGTTTCAGAATCAATTTGTTATCATCAAGTTTTAGAGCTAGAAATAGC	construction of psgRNA-grxB48	This study
grxB_psgRNA_N20_com_48	GCTATTTCTAGCTCTAAAACTTGATGATAACAAATTGATTCTGAAACCGCTGCGGCGATG	construction of psgRNA-grxB48	This study
grxB_psgRNA_N20-49	CATCGCCGCAGCGGTTTCAGGATTTAATCCTGACCCGCCGGTTTTAGAGCTAGAAATAGC	construction of psgRNA-grxB49	This study
grxB_psgRNA_N20_com_49	GCTATTTCTAGCTCTAAAACCGGCGGGTCAGGATTAAATCCTGAAACCGCTGCGGCGATG	construction of psgRNA-grxB49	This study
grxB_psgRNA_N20-51	CATCGCCGCAGCGGTTTCAGGCGAATACAGGCTGCCGCGGGTTTTAGAGCTAGAAATAGC	construction of psgRNA-grxB51	This study
grxB_psgRNA_N20_com_51	GCTATTTCTAGCTCTAAAACCCGCGGCAGCCTGTATTCGCCTGAAACCGCTGCGGCGATG	construction of psgRNA-grxB51	This study
hisC_psgRNA_N20_com-04	GCTATTTCTAGCTCTAAAACTGACTATTACCGATTTAGCGCTGAAACCGCTGCGGCGATG	construction of psgRNA-hisC4	This study
hisC_psgRNA_N20-04	CATCGCCGCAGCGGTTTCAGCGCTAAATCGGTAATAGTCAGTTTTAGAGCTAGAAATAGC	construction of psgRNA-hisC4	This study
hisC_psgRNA_N20_com-05	GCTATTTCTAGCTCTAAAACATTTAGCGCGTGAAAACGTCCTGAAACCGCTGCGGCGATG	construction of psgRNA-hisC5	This study
hisC_psgRNA_N20-05	CATCGCCGCAGCGGTTTCAGGACGTTTTCACGCGCTAAATGTTTTAGAGCTAGAAATAGC	construction of psgRNA-hisC5	This study
hisC_psgRNA_N20_com-06	GCTATTTCTAGCTCTAAAACGACGACGCGCCGACTGATACCTGAAACCGCTGCGGCGATG	construction of psgRNA-hisC6	This study
hisC_psgRNA_N20-06	CATCGCCGCAGCGGTTTCAGGTATCAGTCGGCGCGTCGTCGTTTTAGAGCTAGAAATAGC	construction of psgRNA-hisC6	This study
hisF_psgRNA_N20-10	CATCGCCGCAGCGGTTTCAGTCAGCGTAGCGTTTTGCCAGGTTTTAGAGCTAGAAATAGC	construction of psgRNA-hisF10	This study
hisF_psgRNA_N20_com-10	GCTATTTCTAGCTCTAAAACCTGGCAAAACGCTACGCTGACTGAAACCGCTGCGGCGATG	construction of psgRNA-hisF10	This study
hisF_psgRNA_N20_com-04	GCTATTTCTAGCTCTAAAACTCACGAACGTCGAGACATGGCTGAAACCGCTGCGGCGATG	construction of psgRNA-hisF4	This study
hisF_psgRNA_N20-04	CATCGCCGCAGCGGTTTCAGCCATGTCTCGACGTTCGTGAGTTTTAGAGCTAGAAATAGC	construction of psgRNA-hisF4	This study
hisF_psgRNA_N20_com-05	GCTATTTCTAGCTCTAAAACTGTCTCGACGTTCGTGATGGCTGAAACCGCTGCGGCGATG	construction of psgRNA-hisF5	This study
hisF_psgRNA_N20-05	CATCGCCGCAGCGGTTTCAGCCATCACGAACGTCGAGACAGTTTTAGAGCTAGAAATAGC	construction of psgRNA-hisF5	This study
hisF_psgRNA_N20_com-06	GCTATTTCTAGCTCTAAAACTTCACCACCTGACCATCACGCTGAAACCGCTGCGGCGATG	construction of psgRNA-hisF6	This study
hisF_psgRNA_N20-06	CATCGCCGCAGCGGTTTCAGCGTGATGGTCAGGTGGTGAAGTTTTAGAGCTAGAAATAGC	construction of psgRNA-hisF6	This study
hisF_psgRNA_N20_com-07	GCTATTTCTAGCTCTAAAACATGATTTCATGGTTGCGAAACTGAAACCGCTGCGGCGATG	construction of psgRNA-hisF7	This study
hisF_psgRNA_N20-07	CATCGCCGCAGCGGTTTCAGTTTCGCAACCATGAAATCATGTTTTAGAGCTAGAAATAGC	construction of psgRNA-hisF7	This study
hisF_psgRNA_N20-08	CATCGCCGCAGCGGTTTCAGCATCACGAACGTCGAGACATGTTTTAGAGCTAGAAATAGC	construction of psgRNA-hisF8	This study
hisF_psgRNA_N20_com-08	GCTATTTCTAGCTCTAAAACATGTCTCGACGTTCGTGATGCTGAAACCGCTGCGGCGATG	construction of psgRNA-hisF8	This study
hisF_psgRNA_N20-09	CATCGCCGCAGCGGTTTCAGCATTGGCGATATCGTGCCGCGTTTTAGAGCTAGAAATAGC	construction of psgRNA-hisF9	This study
hisF_psgRNA_N20_com-09	GCTATTTCTAGCTCTAAAACGCGGCACGATATCGCCAATGCTGAAACCGCTGCGGCGATG	construction of psgRNA-hisF9	This study
hisH_psgRNA_N20_com-04	GCTATTTCTAGCTCTAAAACGTATCAAGGATCACCACGTTCTGAAACCGCTGCGGCGATG	construction of psgRNA-hisH4	This study
hisH_psgRNA_N20-04	CATCGCCGCAGCGGTTTCAGAACGTGGTGATCCTTGATACGTTTTAGAGCTAGAAATAGC	construction of psgRNA-hisH4	This study
hisH_psgRNA_N20_com-05	GCTATTTCTAGCTCTAAAACTGATACCGGCTGCGCCAACCCTGAAACCGCTGCGGCGATG	construction of psgRNA-hisH5	This study
hisH_psgRNA_N20-05	CATCGCCGCAGCGGTTTCAGGGTTGGCGCAGCCGGTATCAGTTTTAGAGCTAGAAATAGC	construction of psgRNA-hisH5	This study
hisH_psgRNA_N20_com-06	GCTATTTCTAGCTCTAAAACGCTGCGCCAACCTGAACTCGCTGAAACCGCTGCGGCGATG	construction of psgRNA-hisH6	This study
hisH_psgRNA_N20-06	CATCGCCGCAGCGGTTTCAGCGAGTTCAGGTTGGCGCAGCGTTTTAGAGCTAGAAATAGC	construction of psgRNA-hisH6	This study
hisJ_psgRNA_N20_com-02	GCTATTTCTAGCTCTAAAACGAACCAGAGAGAGCGATAGCCTGAAACCGCTGCGGCGATG	construction of psgRNA-hisJ2	This study
hisJ_psgRNA_N20-02	CATCGCCGCAGCGGTTTCAGGCTATCGCTCTCTCTGGTTCGTTTTAGAGCTAGAAATAGC	construction of psgRNA-hisJ2	This study
hisJ_psgRNA_N20_com-03	GCTATTTCTAGCTCTAAAACCAGTTGCGCTGGAGAAGGCCCTGAAACCGCTGCGGCGATG	construction of psgRNA-hisJ3	This study
hisJ_psgRNA_N20-03	CATCGCCGCAGCGGTTTCAGGGCCTTCTCCAGCGCAACTGGTTTTAGAGCTAGAAATAGC	construction of psgRNA-hisJ3	This study
hns_sgRNA_com_1	TTCTAGCTCTAAAACGCGCACGAAGAGTACGGATGCTGAAACCGCTGCGG	construction of psgRNA-hns1-7	This study
hns_sgRNA_N20_1	CCGCAGCGGTTTCAGCATCCGTACTCTTCGTGCGCGTTTTAGAGCTAGAA	construction of psgRNA-hns1-7	This study
hns_sgRNA_com_2	TTCTAGCTCTAAAACTACTCTTCGTGCGCAGGCAACTGAAACCGCTGCGG	construction of psgRNA-hns2-51	This study
hns_sgRNA_N20_2	CCGCAGCGGTTTCAGTTGCCTGCGCACGAAGAGTAGTTTTAGAGCTAGAA	construction of psgRNA-hns2-51	This study
hns_sgRNA_com_3	TTCTAGCTCTAAAACGCGTTTCAAGTGTACATTCTCTGAAACCGCTGCGG	construction of psgRNA-hns3-1	This study
hns_sgRNA_N20_3	CCGCAGCGGTTTCAGAGAATGTACACTTGAAACGCGTTTTAGAGCTAGAA	construction of psgRNA-hns3-1	This study
hslU_sgRNA_com-1	TTCTAGCTCTAAAACGGCCGATGATGTGCTTATCCCTGAAACCGCTGCGG	construction of psgRNA-hslU1-1	This study
hslU_sgRNA_N20-1	CCGCAGCGGTTTCAGGGATAAGCACATCATCGGCCGTTTTAGAGCTAGAA	construction of psgRNA-hslU1-1	This study
hslU_sgRNA_com-2	TTCTAGCTCTAAAACGTTCTTCAGCGCGATAACGGCTGAAACCGCTGCGG	construction of psgRNA-hslU2-1	This study
hslU_sgRNA_N20-2	CCGCAGCGGTTTCAGCCGTTATCGCGCTGAAGAACGTTTTAGAGCTAGAA	construction of psgRNA-hslU2-1	This study
hslU_sgRNA_com-3	TTCTAGCTCTAAAACAGCCGAATGCCTCTATCACCCTGAAACCGCTGCGG	construction of psgRNA-hslU3-1	This study
hslU_sgRNA_N20-3	CCGCAGCGGTTTCAGGGTGATAGAGGCATTCGGCTGTTTTAGAGCTAGAA	construction of psgRNA-hslU3-1	This study
hslV_sgRNA_com-1	TTCTAGCTCTAAAACGCGATGACCACATGGCCGTTCTGAAACCGCTGCGG	construction of psgRNA-hslV1-1	This study
hslV_sgRNA_N20-1	CCGCAGCGGTTTCAGAACGGCCATGTGGTCATCGCGTTTTAGAGCTAGAA	construction of psgRNA-hslV1-1	This study
hslV_sgRNA_com-2	TTCTAGCTCTAAAACTTCATTACGGTATTGCCCAACTGAAACCGCTGCGG	construction of psgRNA-hslV2-1	This study
hslV_sgRNA_N20-2	CCGCAGCGGTTTCAGTTGGGCAATACCGTAATGAAGTTTTAGAGCTAGAA	construction of psgRNA-hslV2-1	This study
hslV_sgRNA_com-3	TTCTAGCTCTAAAACCGTCACCGTTACCGGTGATGCTGAAACCGCTGCGG	construction of psgRNA-hslV3-1	This study
hslV_sgRNA_N20-3	CCGCAGCGGTTTCAGCATCACCGGTAACGGTGACGGTTTTAGAGCTAGAA	construction of psgRNA-hslV3-1	This study
hslV_sgRNA_com-4	TTCTAGCTCTAAAACCATGGCCGTTACGGCGTACGCTGAAACCGCTGCGG	construction of psgRNA-hslV4	This study
hslV_sgRNA_N20-4	CCGCAGCGGTTTCAGCGTACGCCGTAACGGCCATGGTTTTAGAGCTAGAA	construction of psgRNA-hslV4	This study
hslV_sgRNA_com-5	TTCTAGCTCTAAAACATAGCAATAAGATCGTTTTCCTGAAACCGCTGCGG	construction of psgRNA-hslV5	This study
hslV_sgRNA_N20-5	CCGCAGCGGTTTCAGGAAAACGATCTTATTGCTATGTTTTAGAGCTAGAA	construction of psgRNA-hslV5	This study
hupA_sgRNA_com_1	TTCTAGCTCTAAAACGGGTTTTGGACAGTTCTGCTCTGAAACCGCTGCGG	construction of psgRNA-hupA1-1	This study
hupA_sgRNA_N20_1	CCGCAGCGGTTTCAGAGCAGAACTGTCCAAAACCCGTTTTAGAGCTAGAA	construction of psgRNA-hupA1-1	This study
hupA_sgRNA_com_2	TTCTAGCTCTAAAACGAGCAGCTTTAGCCTGGGTTCTGAAACCGCTGCGG	construction of psgRNA-hupA2-3	This study
hupA_sgRNA_N20_2	CCGCAGCGGTTTCAGAACCCAGGCTAAAGCTGCTCGTTTTAGAGCTAGAA	construction of psgRNA-hupA2-3	This study
hupA_sgRNA_com_3	TTCTAGCTCTAAAACAGGCTAAAGCTGCTCTGGAGCTGAAACCGCTGCGG	construction of psgRNA-hupA3-15	This study
hupA_sgRNA_N20_3	CCGCAGCGGTTTCAGCTCCAGAGCAGCTTTAGCCTGTTTTAGAGCTAGAA	construction of psgRNA-hupA3-15	This study
hupB_sgRNA_com_1	TTCTAGCTCTAAAACGCAGCAATCTTGTCGATCAACTGAAACCGCTGCGG	construction of psgRNA-hupB1-15	This study
hupB_sgRNA_N20_1	CCGCAGCGGTTTCAGTTGATCGACAAGATTGCTGCGTTTTAGAGCTAGAA	construction of psgRNA-hupB1-15	This study
hupB_sgRNA_com_2	TTCTAGCTCTAAAACTGCAGCAATCTTGTCGATCACTGAAACCGCTGCGG	construction of psgRNA-hupB2-8	This study
hupB_sgRNA_N20_2	CCGCAGCGGTTTCAGTGATCGACAAGATTGCTGCAGTTTTAGAGCTAGAA	construction of psgRNA-hupB2-8	This study
hupB_sgRNA_com_3	TTCTAGCTCTAAAACCTGCAGCAATCTTGTCGATCCTGAAACCGCTGCGG	construction of psgRNA-hupB3-1	This study
hupB_sgRNA_N20_3	CCGCAGCGGTTTCAGGATCGACAAGATTGCTGCAGGTTTTAGAGCTAGAA	construction of psgRNA-hupB3-1	This study
ihfA_sgRNA_com_1	TTCTAGCTCTAAAACAGCTTATCAAACAGATATTCCTGAAACCGCTGCGG	construction of psgRNA-ihfA1-7	This study
ihfA_sgRNA_N20_1	CCGCAGCGGTTTCAGGAATATCTGTTTGATAAGCTGTTTTAGAGCTAGAA	construction of psgRNA-ihfA1-7	This study
ihfA_sgRNA_com_2	TTCTAGCTCTAAAACAAGCTTATCAAACAGATATTCTGAAACCGCTGCGG	construction of psgRNA-ihfA2-1	This study
ihfA_sgRNA_N20_2	CCGCAGCGGTTTCAGAATATCTGTTTGATAAGCTTGTTTTAGAGCTAGAA	construction of psgRNA-ihfA2-1	This study
ihfA_sgRNA_com_3	TTCTAGCTCTAAAACCTTGCTAAGCCCAAGCTTATCTGAAACCGCTGCGG	construction of psgRNA-ihfA3-15	This study
ihfA_sgRNA_N20_3	CCGCAGCGGTTTCAGATAAGCTTGGGCTTAGCAAGGTTTTAGAGCTAGAA	construction of psgRNA-ihfA3-15	This study
ihfA_sgRNA_com_4	TTCTAGCTCTAAAACGCTTGCTAAGCCCAAGCTTACTGAAACCGCTGCGG	construction of psgRNA-ihfA4-11	This study
ihfA_sgRNA_N20_4	CCGCAGCGGTTTCAGTAAGCTTGGGCTTAGCAAGCGTTTTAGAGCTAGAA	construction of psgRNA-ihfA4-11	This study
ihfA_sgRNA_com_5	TTCTAGCTCTAAAACGAGCGCGACGGATCTCTTCGCTGAAACCGCTGCGG	construction of psgRNA-ihfA5-1	This study
ihfA_sgRNA_N20_5	CCGCAGCGGTTTCAGCGAAGAGATCCGTCGCGCTCGTTTTAGAGCTAGAA	construction of psgRNA-ihfA5-1	This study
ihfA_sgRNA_com_6	TTCTAGCTCTAAAACTTTTCCAGAGCGCGACGGATCTGAAACCGCTGCGG	construction of psgRNA-ihfA6-3	This study
ihfA_sgRNA_N20_6	CCGCAGCGGTTTCAGATCCGTCGCGCTCTGGAAAAGTTTTAGAGCTAGAA	construction of psgRNA-ihfA6-3	This study
ihfA_sgRNA_com_7	TTCTAGCTCTAAAACGTTCGCCGTTTTCCAGAGCGCTGAAACCGCTGCGG	construction of psgRNA-ihfA7-2	This study
ihfA_sgRNA_N20_7	CCGCAGCGGTTTCAGCGCTCTGGAAAACGGCGAACGTTTTAGAGCTAGAA	construction of psgRNA-ihfA7-2	This study
ihfA_sgRNA_com_8	TTCTAGCTCTAAAACAAGAACTGGTTGAACTGTTTCTGAAACCGCTGCGG	construction of psgRNA-ihfA8-1	This study
ihfA_sgRNA_N20_8	CCGCAGCGGTTTCAGAAACAGTTCAACCAGTTCTTGTTTTAGAGCTAGAA	construction of psgRNA-ihfA8-1	This study
ihfA_sgRNA_com_9	TTCTAGCTCTAAAACGAGAGTTTCACCTGTTCGCCCTGAAACCGCTGCGG	construction of psgRNA-ihfA9-1	This study
ihfA_sgRNA_N20_9	CCGCAGCGGTTTCAGGGCGAACAGGTGAAACTCTCGTTTTAGAGCTAGAA	construction of psgRNA-ihfA9-1	This study
ihfB_sgRNA_com_1	TTCTAGCTCTAAAACCCCAGCAATCGCACATTCCCCTGAAACCGCTGCGG	construction of psgRNA-ihfB1-40	This study
ihfB_sgRNA_N20_1	CCGCAGCGGTTTCAGGGGAATGTGCGATTGCTGGGGTTTTAGAGCTAGAA	construction of psgRNA-ihfB1-40	This study
ihfB_sgRNA_com_2	TTCTAGCTCTAAAACAGCAATCGCACATTCCCGCCCTGAAACCGCTGCGG	construction of psgRNA-ihfB2-13	This study
ihfB_sgRNA_N20_2	CCGCAGCGGTTTCAGGGCGGGAATGTGCGATTGCTGTTTTAGAGCTAGAA	construction of psgRNA-ihfB2-13	This study
ihfB_sgRNA_com_3	TTCTAGCTCTAAAACGCAATCGCACATTCCCGCCACTGAAACCGCTGCGG	construction of psgRNA-ihfB3-5	This study
ihfB_sgRNA_N20_3	CCGCAGCGGTTTCAGTGGCGGGAATGTGCGATTGCGTTTTAGAGCTAGAA	construction of psgRNA-ihfB3-5	This study
ilvG_psgRNA_N20_com-01	GCTATTTCTAGCTCTAAAACGTAATTCAGAAATGTTGGAGCTGAAACCGCTGCGGCGATG	construction of psgRNA-ilvG1	This study
ilvG_psgRNA_N20-01	CATCGCCGCAGCGGTTTCAGCTCCAACATTTCTGAATTACGTTTTAGAGCTAGAAATAGC	construction of psgRNA-ilvG1	This study
ilvG_psgRNA_N20_com-02	GCTATTTCTAGCTCTAAAACGATGTTGCATCATGATAATTCTGAAACCGCTGCGGCGATG	construction of psgRNA-ilvG2	This study
ilvG_psgRNA_N20-02	CATCGCCGCAGCGGTTTCAGAATTATCATGATGCAACATCGTTTTAGAGCTAGAAATAGC	construction of psgRNA-ilvG2	This study
ilvG_psgRNA_N20_com-03	GCTATTTCTAGCTCTAAAACATACATTGACCTGATGTTGCCTGAAACCGCTGCGGCGATG	construction of psgRNA-ilvG3	This study
ilvG_psgRNA_N20-03	CATCGCCGCAGCGGTTTCAGGCAACATCAGGTCAATGTATGTTTTAGAGCTAGAAATAGC	construction of psgRNA-ilvG3	This study
ilvM_psgRNA_N20_com-01	GCTATTTCTAGCTCTAAAACTTTGCGCTCAGGCGCGGATTCTGAAACCGCTGCGGCGATG	construction of psgRNA-ilvM1	This study
ilvM_psgRNA_N20-01	CATCGCCGCAGCGGTTTCAGAATCCGCGCCTGAGCGCAAAGTTTTAGAGCTAGAAATAGC	construction of psgRNA-ilvM1	This study
ilvM_psgRNA_N20_com-02	GCTATTTCTAGCTCTAAAACCGCCTGAGCGCAAAAGGAATCTGAAACCGCTGCGGCGATG	construction of psgRNA-ilvM2	This study
ilvM_psgRNA_N20-02	CATCGCCGCAGCGGTTTCAGATTCCTTTTGCGCTCAGGCGGTTTTAGAGCTAGAAATAGC	construction of psgRNA-ilvM2	This study
ilvM_psgRNA_N20_com-03	GCTATTTCTAGCTCTAAAACGAGCGCAAAAGGAATATAAACTGAAACCGCTGCGGCGATG	construction of psgRNA-ilvM3	This study
ilvM_psgRNA_N20-03	CATCGCCGCAGCGGTTTCAGTTTATATTCCTTTTGCGCTCGTTTTAGAGCTAGAAATAGC	construction of psgRNA-ilvM3	This study
ispB_psgRNA_N20_com-01	GCTATTTCTAGCTCTAAAACTATCTTGCGCGGTTAACTCACTGAAACCGCTGCGGCGATG	construction of psgRNA-ispB1-1	This study
ispB_psgRNA_N20-01	CATCGCCGCAGCGGTTTCAGTGAGTTAACCGCGCAAGATAGTTTTAGAGCTAGAAATAGC	construction of psgRNA-ispB1-1	This study
ispB_psgRNA_N20_com-02	GCTATTTCTAGCTCTAAAACGCCATATCTTGCGCGGTTAACTGAAACCGCTGCGGCGATG	construction of psgRNA-ispB2-1	This study
ispB_psgRNA_N20-02	CATCGCCGCAGCGGTTTCAGTTAACCGCGCAAGATATGGCGTTTTAGAGCTAGAAATAGC	construction of psgRNA-ispB2-1	This study
ispB_psgRNA_N20_com-03	GCTATTTCTAGCTCTAAAACCGCAAGATATGGCGGGTGTTCTGAAACCGCTGCGGCGATG	construction of psgRNA-ispB3-1	This study
ispB_psgRNA_N20-03	CATCGCCGCAGCGGTTTCAGAACACCCGCCATATCTTGCGGTTTTAGAGCTAGAAATAGC	construction of psgRNA-ispB3-1	This study
ispB_psgRNA_N20_com-04	GCTATTTCTAGCTCTAAAACCATTAACACCCGCCATATCTCTGAAACCGCTGCGGCGATG	construction of psgRNA-ispB4-1	This study
ispB_psgRNA_N20-04	CATCGCCGCAGCGGTTTCAGAGATATGGCGGGTGTTAATGGTTTTAGAGCTAGAAATAGC	construction of psgRNA-ispB4-1	This study
kdpD_sgRNA_com-1	TTCTAGCTCTAAAACGCAGACGATCGGGGTCGGGACTGAAACCGCTGCGG	construction of psgRNA-kdpD1-4	This study
kdpD_sgRNA_N20-1	CCGCAGCGGTTTCAGTCCCGACCCCGATCGTCTGCGTTTTAGAGCTAGAA	construction of psgRNA-kdpD1-4	This study
kdpD_sgRNA_com-2	TTCTAGCTCTAAAACCGATCGTCTGCTGGAACAAACTGAAACCGCTGCGG	construction of psgRNA-kdpD2-32	This study
kdpD_sgRNA_N20-2	CCGCAGCGGTTTCAGTTTGTTCCAGCAGACGATCGGTTTTAGAGCTAGAA	construction of psgRNA-kdpD2-32	This study
kdpD_sgRNA_com-3	TTCTAGCTCTAAAACGATCGTCTGCTGGAACAAACCTGAAACCGCTGCGG	construction of psgRNA-kdpD3-11	This study
kdpD_sgRNA_N20-3	CCGCAGCGGTTTCAGGTTTGTTCCAGCAGACGATCGTTTTAGAGCTAGAA	construction of psgRNA-kdpD3-11	This study
kdpE_sgRNA_com-1	TTCTAGCTCTAAAACTGCGCAGAAAGCGACGAATACTGAAACCGCTGCGG	construction of psgRNA-kdpE1-63	Miyake et al, 2020 (as the kdpE_sgRNA_com)
kdpE_sgRNA_N20-1	CCGCAGCGGTTTCAGTATTCGTCGCTTTCTGCGCAGTTTTAGAGCTAGAA	construction of psgRNA-kdpE1-63	Miyake et al, 2020 (as the kdpE_sgRNA_N20)
kdpE_sgRNA_com-2	TTCTAGCTCTAAAACGCGCCGTGCGCAGAAAGCGACTGAAACCGCTGCGG	construction of psgRNA-kdpE2-8	This study
kdpE_sgRNA_N20-2	CCGCAGCGGTTTCAGTCGCTTTCTGCGCACGGCGCGTTTTAGAGCTAGAA	construction of psgRNA-kdpE2-8	This study
kdpE_sgRNA_com-3	TTCTAGCTCTAAAACCCAGCGCCGTGCGCAGAAAGCTGAAACCGCTGCGG	construction of psgRNA-kdpE3-42	This study
kdpE_sgRNA_N20-3	CCGCAGCGGTTTCAGCTTTCTGCGCACGGCGCTGGGTTTTAGAGCTAGAA	construction of psgRNA-kdpE3-42	This study
kup_sgRNA_com-1	TTCTAGCTCTAAAACCGAGGGTAATCGCGGGCAATCTGAAACCGCTGCGG	construction of psgRNA-kup1-10	This study
kup_sgRNA_N20-1	CCGCAGCGGTTTCAGATTGCCCGCGATTACCCTCGGTTTTAGAGCTAGAA	construction of psgRNA-kup1-10	This study
kup_sgRNA_com-2	TTCTAGCTCTAAAACGCGATTACCCTCGCGGCGATCTGAAACCGCTGCGG	construction of psgRNA-kup2-7	This study
kup_sgRNA_N20-2	CCGCAGCGGTTTCAGATCGCCGCGAGGGTAATCGCGTTTTAGAGCTAGAA	construction of psgRNA-kup2-7	This study
kup_sgRNA_com-3	TTCTAGCTCTAAAACCGATTACCCTCGCGGCGATTCTGAAACCGCTGCGG	construction of psgRNA-kup3-4	This study
kup_sgRNA_N20-3	CCGCAGCGGTTTCAGAATCGCCGCGAGGGTAATCGGTTTTAGAGCTAGAA	construction of psgRNA-kup3-4	This study
lacI_psgRNA_N20_com-01	GCTATTTCTAGCTCTAAAACGTAACGTTATACGATGTCGCCTGAAACCGCTGCGGCGATG	construction of psgRNA-lacI1	This study
lacI_psgRNA_N20-01	CATCGCCGCAGCGGTTTCAGGCGACATCGTATAACGTTACGTTTTAGAGCTAGAAATAGC	construction of psgRNA-lacI1	This study
lacI_psgRNA_N20_com-02	GCTATTTCTAGCTCTAAAACGCATACTCTGCGACATCGTACTGAAACCGCTGCGGCGATG	construction of psgRNA-lacI2	This study
lacI_psgRNA_N20-02	CATCGCCGCAGCGGTTTCAGTACGATGTCGCAGAGTATGCGTTTTAGAGCTAGAAATAGC	construction of psgRNA-lacI2	This study
lacI_psgRNA_N20_com-03	GCTATTTCTAGCTCTAAAACGTGTCTCTTATCAGACCGTTCTGAAACCGCTGCGGCGATG	construction of psgRNA-lacI3	This study
lacI_psgRNA_N20-03	CATCGCCGCAGCGGTTTCAGAACGGTCTGATAAGAGACACGTTTTAGAGCTAGAAATAGC	construction of psgRNA-lacI3	This study
lacI_psgRNA_N20_com-04	GCTATTTCTAGCTCTAAAACCGCGGGAAACGGTCTGATAACTGAAACCGCTGCGGCGATG	construction of psgRNA-lacI4	This study
lacI_psgRNA_N20-04	CATCGCCGCAGCGGTTTCAGTTATCAGACCGTTTCCCGCGGTTTTAGAGCTAGAAATAGC	construction of psgRNA-lacI4	This study
lacI_psgRNA_N20_com-05	GCTATTTCTAGCTCTAAAACTTTCCCGCGTGGTGAACCAGCTGAAACCGCTGCGGCGATG	construction of psgRNA-lacI5	This study
lacI_psgRNA_N20-05	CATCGCCGCAGCGGTTTCAGCTGGTTCACCACGCGGGAAAGTTTTAGAGCTAGAAATAGC	construction of psgRNA-lacI5	This study
lacI_psgRNA_N20_com-06	GCTATTTCTAGCTCTAAAACGGTTCACCACGCGGGAAACGCTGAAACCGCTGCGGCGATG	construction of psgRNA-lacI6	This study
lacI_psgRNA_N20-06	CATCGCCGCAGCGGTTTCAGCGTTTCCCGCGTGGTGAACCGTTTTAGAGCTAGAAATAGC	construction of psgRNA-lacI6	This study
lacI_psgRNA_N20_com-07	GCTATTTCTAGCTCTAAAACGCGTGGTGAACCAGGCCAGCCTGAAACCGCTGCGGCGATG	construction of psgRNA-lacI7	This study
lacI_psgRNA_N20-07	CATCGCCGCAGCGGTTTCAGGCTGGCCTGGTTCACCACGCGTTTTAGAGCTAGAAATAGC	construction of psgRNA-lacI7	This study
lacI_psgRNA_N20_com-08	GCTATTTCTAGCTCTAAAACCGTGGTGAACCAGGCCAGCCCTGAAACCGCTGCGGCGATG	construction of psgRNA-lacI8	This study
lacI_psgRNA_N20-08	CATCGCCGCAGCGGTTTCAGGGCTGGCCTGGTTCACCACGGTTTTAGAGCTAGAAATAGC	construction of psgRNA-lacI8	This study
lacZ_psgRNA_N20_com-11	GCTATTTCTAGCTCTAAAACGGGTTTTCCCAGTCACGACGCTGAAACCGCTGCGGCGATG	construction of psgRNA-lacZ11	This study
lacZ_psgRNA_N20-11	CATCGCCGCAGCGGTTTCAGCGTCGTGACTGGGAAAACCCGTTTTAGAGCTAGAAATAGC	construction of psgRNA-lacZ11	This study
lacZ_psgRNA_N20_com-12	GCTATTTCTAGCTCTAAAACTGGCGTTACCCAACTTAATCCTGAAACCGCTGCGGCGATG	construction of psgRNA-lacZ12	This study
lacZ_psgRNA_N20-12	CATCGCCGCAGCGGTTTCAGGATTAAGTTGGGTAACGCCAGTTTTAGAGCTAGAAATAGC	construction of psgRNA-lacZ12	This study
lacZ_psgRNA_N20_com-13	GCTATTTCTAGCTCTAAAACGGCGTTACCCAACTTAATCGCTGAAACCGCTGCGGCGATG	construction of psgRNA-lacZ13	This study
lacZ_psgRNA_N20-13	CATCGCCGCAGCGGTTTCAGCGATTAAGTTGGGTAACGCCGTTTTAGAGCTAGAAATAGC	construction of psgRNA-lacZ13	This study
lacZ_psgRNA_N20_com-14	GCTATTTCTAGCTCTAAAACGCTGGCGAAAGGGGGATGTGCTGAAACCGCTGCGGCGATG	construction of psgRNA-lacZ14	This study
lacZ_psgRNA_N20-14	CATCGCCGCAGCGGTTTCAGCACATCCCCCTTTCGCCAGCGTTTTAGAGCTAGAAATAGC	construction of psgRNA-lacZ14	This study
lacZ_psgRNA_N20_com-15	GCTATTTCTAGCTCTAAAACTTCGCCAGCTGGCGTAATAGCTGAAACCGCTGCGGCGATG	construction of psgRNA-lacZ15	This study
lacZ_psgRNA_N20-15	CATCGCCGCAGCGGTTTCAGCTATTACGCCAGCTGGCGAAGTTTTAGAGCTAGAAATAGC	construction of psgRNA-lacZ15	This study
lacZ_psgRNA_N20_com-16	GCTATTTCTAGCTCTAAAACTTCGCCATTCAGGCTGCGCACTGAAACCGCTGCGGCGATG	construction of psgRNA-lacZ16	This study
lacZ_psgRNA_N20-16	CATCGCCGCAGCGGTTTCAGTGCGCAGCCTGAATGGCGAAGTTTTAGAGCTAGAAATAGC	construction of psgRNA-lacZ16	This study
lacZ_sgRNA_com-03	TTCTAGCTCTAAAACTCGTTTTACAACGTC GTGACCTGAAACCGCTGCGG	construction of psgRNA-lacZ3-1	This study
lacZ_sgRNA_N20-03	CCGCAGCGGTTTCAGGTCACGACGTTGTAA AACGAGTTTTAGAGCTAGAA	construction of psgRNA-lacZ3-1	This study
lacZ_sgRNA_com-05	TTCTAGCTCTAAAACAGTCACGACGTTGTA AAACGCTGAAACCGCTGCGG	construction of psgRNA-lacZ5-2	This study
lacZ_sgRNA_N20-05	CCGCAGCGGTTTCAGCGTTTTACAACGTCG TGACTGTTTTAGAGCTAGAA	construction of psgRNA-lacZ5-2	This study
lldD_psgRNA_N20_com-01	GCTATTTCTAGCTCTAAAACCAGCCAGCGATTATCGCGCCCTGAAACCGCTGCGGCGATG	construction of psgRNA-lldD1	This study
lldD_psgRNA_N20-01	CATCGCCGCAGCGGTTTCAGGGCGCGATAATCGCTGGCTGGTTTTAGAGCTAGAAATAGC	construction of psgRNA-lldD1	This study
lldD_psgRNA_N20_com-03	GCTATTTCTAGCTCTAAAACCAGCGCAACGCATTCTGCCGCTGAAACCGCTGCGGCGATG	construction of psgRNA-lldD3	This study
lldD_psgRNA_N20-03	CATCGCCGCAGCGGTTTCAGCGGCAGAATGCGTTGCGCTGGTTTTAGAGCTAGAAATAGC	construction of psgRNA-lldD3	This study
lpd-yacH_psgRNA_N20_com-01	GCTATTTCTAGCTCTAAAACGCAAACGAAAAATTACTTCTCTGAAACCGCTGCGGCGATG	construction of psgRNA-lpd-yacH1	This study
lpd-yacH_psgRNA_N20-01	CATCGCCGCAGCGGTTTCAGAGAAGTAATTTTTCGTTTGCGTTTTAGAGCTAGAAATAGC	construction of psgRNA-lpd-yacH1	This study
lpd-yacH_psgRNA_N20_com-02	GCTATTTCTAGCTCTAAAACGATGTTCCGGCAAACGAAAACTGAAACCGCTGCGGCGATG	construction of psgRNA-lpd-yacH2	This study
lpd-yacH_psgRNA_N20-02	CATCGCCGCAGCGGTTTCAGTTTTCGTTTGCCGGAACATCGTTTTAGAGCTAGAAATAGC	construction of psgRNA-lpd-yacH2	This study
lpd-yacH_psgRNA_N20_com-03	GCTATTTCTAGCTCTAAAACGAACATCCGGCAATTAAAAACTGAAACCGCTGCGGCGATG	construction of psgRNA-lpd-yacH3	This study
lpd-yacH_psgRNA_N20-03	CATCGCCGCAGCGGTTTCAGTTTTTAATTGCCGGATGTTCGTTTTAGAGCTAGAAATAGC	construction of psgRNA-lpd-yacH3	This study
lpp_psgRNA_N20_com-01	GCTATTTCTAGCTCTAAAACGTACCAGTTTAGTAGCTTTCCTGAAACCGCTGCGGCGATG	construction of psgRNA-lpp1-1	This study
lpp_psgRNA_N20-01	CATCGCCGCAGCGGTTTCAGGAAAGCTACTAAACTGGTACGTTTTAGAGCTAGAAATAGC	construction of psgRNA-lpp1-1	This study
lpp_psgRNA_N20_com-10	GCTATTTCTAGCTCTAAAACTGTTGTCCAGACGCTGGTTACTGAAACCGCTGCGGCGATG	construction of psgRNA-lpp10	This study
lpp_psgRNA_N20-10	CATCGCCGCAGCGGTTTCAGTAACCAGCGTCTGGACAACAGTTTTAGAGCTAGAAATAGC	construction of psgRNA-lpp10	This study
lpp_psgRNA_N20_com-02	GCTATTTCTAGCTCTAAAACCGCCCAGTACCAGTTTAGTACTGAAACCGCTGCGGCGATG	construction of psgRNA-lpp2-1	This study
lpp_psgRNA_N20-02	CATCGCCGCAGCGGTTTCAGTACTAAACTGGTACTGGGCGGTTTTAGAGCTAGAAATAGC	construction of psgRNA-lpp2-1	This study
lpp_psgRNA_N20_com-03	GCTATTTCTAGCTCTAAAACGGATTACCGCGCCCAGTACCCTGAAACCGCTGCGGCGATG	construction of psgRNA-lpp3-1	This study
lpp_psgRNA_N20-03	CATCGCCGCAGCGGTTTCAGGGTACTGGGCGCGGTAATCCGTTTTAGAGCTAGAAATAGC	construction of psgRNA-lpp3-1	This study
lpp_psgRNA_N20_com-04	GCTATTTCTAGCTCTAAAACGCAGAGTAGAACCCAGGATTCTGAAACCGCTGCGGCGATG	construction of psgRNA-lpp4-2	This study
lpp_psgRNA_N20-04	CATCGCCGCAGCGGTTTCAGAATCCTGGGTTCTACTCTGCGTTTTAGAGCTAGAAATAGC	construction of psgRNA-lpp4-2	This study
lpp_psgRNA_N20_com-05	GCTATTTCTAGCTCTAAAACGCAACGCTAAAATCGATCAGCTGAAACCGCTGCGGCGATG	construction of psgRNA-lpp5-1	This study
lpp_psgRNA_N20-05	CATCGCCGCAGCGGTTTCAGGAAAGCTACTAAACTGGTACGTTTTAGAGCTAGAAATAGC	construction of psgRNA-lpp5-1	This study
lpp_psgRNA_N20_com-06	GCTATTTCTAGCTCTAAAACGCTGAGCAACGACGTGAACGCTGAAACCGCTGCGGCGATG	construction of psgRNA-lpp6-1	This study
lpp_psgRNA_N20-06	CATCGCCGCAGCGGTTTCAGCGTTCACGTCGTTGCTCAGCGTTTTAGAGCTAGAAATAGC	construction of psgRNA-lpp6-1	This study
lpp_psgRNA_N20_com-07	GCTATTTCTAGCTCTAAAACGAACGTCGGAACGCATTGCGCTGAAACCGCTGCGGCGATG	construction of psgRNA-lpp7-1	This study
lpp_psgRNA_N20-07	CATCGCCGCAGCGGTTTCAGCGCAATGCGTTCCGACGTTCGTTTTAGAGCTAGAAATAGC	construction of psgRNA-lpp7-1	This study
lpp_psgRNA_N20_com-08	GCTATTTCTAGCTCTAAAACACGTTCAGGCTGCTAAAGATCTGAAACCGCTGCGGCGATG	construction of psgRNA-lpp8-1	This study
lpp_psgRNA_N20-08	CATCGCCGCAGCGGTTTCAGATCTTTAGCAGCCTGAACGTGTTTTAGAGCTAGAAATAGC	construction of psgRNA-lpp8-1	This study
lpp_psgRNA_N20_com-09	GCTATTTCTAGCTCTAAAACGACGCTGGTTAGCACGAGCTCTGAAACCGCTGCGGCGATG	construction of psgRNA-lpp9	This study
lpp_psgRNA_N20-09	CATCGCCGCAGCGGTTTCAGAGCTCGTGCTAACCAGCGTCGTTTTAGAGCTAGAAATAGC	construction of psgRNA-lpp9	This study
ltaE_psgRNA_N20_com-02	GCTATTTCTAGCTCTAAAACGACCAAGCCGCGCCATGCTCCTGAAACCGCTGCGGCGATG	construction of psgRNA-ltaE2	This study
ltaE_psgRNA_N20-02	CATCGCCGCAGCGGTTTCAGGAGCATGGCGCGGCTTGGTCGTTTTAGAGCTAGAAATAGC	construction of psgRNA-ltaE2	This study
ltaE_psgRNA_N20_com-03	GCTATTTCTAGCTCTAAAACACCAAGCCGCGCCATGCTCGCTGAAACCGCTGCGGCGATG	construction of psgRNA-ltaE3	This study
ltaE_psgRNA_N20-03	CATCGCCGCAGCGGTTTCAGCGAGCATGGCGCGGCTTGGTGTTTTAGAGCTAGAAATAGC	construction of psgRNA-ltaE3	This study
manY_psgRNA_N20_com-01	GCTATTTCTAGCTCTAAAACGCACAATTTGAAGAGTGGTACTGAAACCGCTGCGGCGATG	construction of psgRNA-manY1	This study
manY_psgRNA_N20-01	CATCGCCGCAGCGGTTTCAGTACCACTCTTCAAATTGTGCGTTTTAGAGCTAGAAATAGC	construction of psgRNA-manY1	This study
manY_psgRNA_N20-10	CATCGCCGCAGCGGTTTCAGACCAGGGTACACGCGATTAGGTTTTAGAGCTAGAAATAGC	construction of psgRNA-manY10-1	This study
manY_psgRNA_N20_com-10	GCTATTTCTAGCTCTAAAACCTAATCGCGTGTACCCTGGTCTGAAACCGCTGCGGCGATG	construction of psgRNA-manY10-1	This study
manY_psgRNA_N20-11	CATCGCCGCAGCGGTTTCAGGCTAATCGCGTGTACCCTGGGTTTTAGAGCTAGAAATAGC	construction of psgRNA-manY11-2	This study
manY_psgRNA_N20_com-11	GCTATTTCTAGCTCTAAAACCCAGGGTACACGCGATTAGCCTGAAACCGCTGCGGCGATG	construction of psgRNA-manY11-2	This study
manY_psgRNA_N20-12	CATCGCCGCAGCGGTTTCAGCTAATCGCGTGTACCCTGGTGTTTTAGAGCTAGAAATAGC	construction of psgRNA-manY12-1	This study
manY_psgRNA_N20_com-12	GCTATTTCTAGCTCTAAAACACCAGGGTACACGCGATTAGCTGAAACCGCTGCGGCGATG	construction of psgRNA-manY12-1	This study
manY_psgRNA_N20_com-02	GCTATTTCTAGCTCTAAAACCTCTTCAAATTGTGCTGGTACTGAAACCGCTGCGGCGATG	construction of psgRNA-manY2	This study
manY_psgRNA_N20-02	CATCGCCGCAGCGGTTTCAGTACCAGCACAATTTGAAGAGGTTTTAGAGCTAGAAATAGC	construction of psgRNA-manY2	This study
manY_psgRNA_N20_com-03	GCTATTTCTAGCTCTAAAACGCGATACAGGCTACGATAAACTGAAACCGCTGCGGCGATG	construction of psgRNA-manY3	This study
manY_psgRNA_N20-03	CATCGCCGCAGCGGTTTCAGTTTATCGTAGCCTGTATCGCGTTTTAGAGCTAGAAATAGC	construction of psgRNA-manY3	This study
manY_psgRNA_N20_com-04	GCTATTTCTAGCTCTAAAACTACCTGCGATACAGGCTACGCTGAAACCGCTGCGGCGATG	construction of psgRNA-manY4	This study
manY_psgRNA_N20-04	CATCGCCGCAGCGGTTTCAGCGTAGCCTGTATCGCAGGTAGTTTTAGAGCTAGAAATAGC	construction of psgRNA-manY4	This study
manY_psgRNA_N20-05	CATCGCCGCAGCGGTTTCAGGTAGCCTGTATCGCAGGTATGTTTTAGAGCTAGAAATAGC	construction of psgRNA-manY5	This study
manY_psgRNA_N20_com-05	GCTATTTCTAGCTCTAAAACATACCTGCGATACAGGCTACCTGAAACCGCTGCGGCGATG	construction of psgRNA-manY5	This study
manY_psgRNA_N20-06	CATCGCCGCAGCGGTTTCAGTGATCCCATACCTGCGATACGTTTTAGAGCTAGAAATAGC	construction of psgRNA-manY6	This study
manY_psgRNA_N20_com-06	GCTATTTCTAGCTCTAAAACGTATCGCAGGTATGGGATCACTGAAACCGCTGCGGCGATG	construction of psgRNA-manY6	This study
manY_psgRNA_N20-07	CATCGCCGCAGCGGTTTCAGGGTGAAACTGAAATTCATCGGTTTTAGAGCTAGAAATAGC	construction of psgRNA-manY7	This study
manY_psgRNA_N20_com-07	GCTATTTCTAGCTCTAAAACCGATGAATTTCAGTTTCACCCTGAAACCGCTGCGGCGATG	construction of psgRNA-manY7	This study
manY_psgRNA_N20-08	CATCGCCGCAGCGGTTTCAGGGGTACACGCGATTAGCGGAGTTTTAGAGCTAGAAATAGC	construction of psgRNA-manY8	This study
manY_psgRNA_N20_com-08	GCTATTTCTAGCTCTAAAACTCCGCTAATCGCGTGTACCCCTGAAACCGCTGCGGCGATG	construction of psgRNA-manY8	This study
manY_psgRNA_N20-09	CATCGCCGCAGCGGTTTCAGTCCGCTAATCGCGTGTACCCGTTTTAGAGCTAGAAATAGC	construction of psgRNA-manY9-2	This study
manY_psgRNA_N20_com-09	GCTATTTCTAGCTCTAAAACGGGTACACGCGATTAGCGGACTGAAACCGCTGCGGCGATG	construction of psgRNA-manY9-2	This study
manZ_psgRNA_N20_com-01	GCTATTTCTAGCTCTAAAACCCGAGAAAAAACTCACTCAACTGAAACCGCTGCGGCGATG	construction of psgRNA-manZ1	This study
manZ_psgRNA_N20-01	CATCGCCGCAGCGGTTTCAGTTGAGTGAGTTTTTTCTCGGGTTTTAGAGCTAGAAATAGC	construction of psgRNA-manZ1	This study
manZ_psgRNA_N20-10	CATCGCCGCAGCGGTTTCAGATGGAACTTCGAACGTATGCGTTTTAGAGCTAGAAATAGC	construction of psgRNA-manZ10-2	This study
manZ_psgRNA_N20_com-10	GCTATTTCTAGCTCTAAAACGCATACGTTCGAAGTTCCATCTGAAACCGCTGCGGCGATG	construction of psgRNA-manZ10-2	This study
manZ_psgRNA_N20-11	CATCGCCGCAGCGGTTTCAGCTTCGAACGTATGCAGGCACGTTTTAGAGCTAGAAATAGC	construction of psgRNA-manZ11-2	This study
manZ_psgRNA_N20_com-11	GCTATTTCTAGCTCTAAAACGTGCCTGCATACGTTCGAAGCTGAAACCGCTGCGGCGATG	construction of psgRNA-manZ11-2	This study
manZ_psgRNA_N20-12	CATCGCCGCAGCGGTTTCAGTTCGAACGTATGCAGGCACTGTTTTAGAGCTAGAAATAGC	construction of psgRNA-manZ12-1	This study
manZ_psgRNA_N20_com-12	GCTATTTCTAGCTCTAAAACAGTGCCTGCATACGTTCGAACTGAAACCGCTGCGGCGATG	construction of psgRNA-manZ12-1	This study
manZ_psgRNA_N20_com-02	GCTATTTCTAGCTCTAAAACAGAAAAAACTCACTCAAAGTCTGAAACCGCTGCGGCGATG	construction of psgRNA-manZ2	This study
manZ_psgRNA_N20-02	CATCGCCGCAGCGGTTTCAGACTTTGAGTGAGTTTTTTCTGTTTTAGAGCTAGAAATAGC	construction of psgRNA-manZ2	This study
manZ_psgRNA_N20_com-03	GCTATTTCTAGCTCTAAAACCGAATATCACTTTGAGTGAGCTGAAACCGCTGCGGCGATG	construction of psgRNA-manZ3	This study
manZ_psgRNA_N20-03	CATCGCCGCAGCGGTTTCAGCTCACTCAAAGTGATATTCGGTTTTAGAGCTAGAAATAGC	construction of psgRNA-manZ3	This study
manZ_psgRNA_N20_com-04	GCTATTTCTAGCTCTAAAACGGAAGAGGTTAGAACGCAGGCTGAAACCGCTGCGGCGATG	construction of psgRNA-manZ4	This study
manZ_psgRNA_N20-04	CATCGCCGCAGCGGTTTCAGCCTGCGTTCTAACCTCTTCCGTTTTAGAGCTAGAAATAGC	construction of psgRNA-manZ4	This study
manZ_psgRNA_N20-05	CATCGCCGCAGCGGTTTCAGCCTGGAAGAGGTTAGAACGCGTTTTAGAGCTAGAAATAGC	construction of psgRNA-manZ5	This study
manZ_psgRNA_N20_com-05	GCTATTTCTAGCTCTAAAACGCGTTCTAACCTCTTCCAGGCTGAAACCGCTGCGGCGATG	construction of psgRNA-manZ5	This study
manZ_psgRNA_N20-06	CATCGCCGCAGCGGTTTCAGCTGCGTTCTAACCTCTTCCAGTTTTAGAGCTAGAAATAGC	construction of psgRNA-manZ6	This study
manZ_psgRNA_N20_com-06	GCTATTTCTAGCTCTAAAACTGGAAGAGGTTAGAACGCAGCTGAAACCGCTGCGGCGATG	construction of psgRNA-manZ6	This study
manZ_psgRNA_N20-07	CATCGCCGCAGCGGTTTCAGCTAACCTCTTCCAGGGTTCAGTTTTAGAGCTAGAAATAGC	construction of psgRNA-manZ7	This study
manZ_psgRNA_N20_com-07	GCTATTTCTAGCTCTAAAACTGAACCCTGGAAGAGGTTAGCTGAAACCGCTGCGGCGATG	construction of psgRNA-manZ7	This study
manZ_psgRNA_N20-08	CATCGCCGCAGCGGTTTCAGAGTTCCATGAACCCTGGAAGGTTTTAGAGCTAGAAATAGC	construction of psgRNA-manZ8	This study
manZ_psgRNA_N20_com-08	GCTATTTCTAGCTCTAAAACCTTCCAGGGTTCATGGAACTCTGAAACCGCTGCGGCGATG	construction of psgRNA-manZ8	This study
manZ_psgRNA_N20-09	CATCGCCGCAGCGGTTTCAGGTTCGAAGTTCCATGAACCCGTTTTAGAGCTAGAAATAGC	construction of psgRNA-manZ9-1	This study
manZ_psgRNA_N20_com-09	GCTATTTCTAGCTCTAAAACGGGTTCATGGAACTTCGAACCTGAAACCGCTGCGGCGATG	construction of psgRNA-manZ9-1	This study
marA sgRNA_com-1	TTCTAGCTCTAAAACTTCATAGCATTTTGGACTGGCTGAAACCGCTGCGG	construction of psgRNA-marA1	This study
marA sgRNA_N20-1	CCGCAGCGGTTTCAGCCAGTCCAAAATGCTATGAAGTTTTAGAGCTAGAA	construction of psgRNA-marA1	This study
marA sgRNA_com-2	TTCTAGCTCTAAAACGGTTGTCCTCGATCCAGTCCCTGAAACCGCTGCGG	construction of psgRNA-marA2	This study
marA sgRNA_N20-2	CCGCAGCGGTTTCAGGGACTGGATCGAGGACAACCGTTTTAGAGCTAGAA	construction of psgRNA-marA2	This study
marA sgRNA_com-3	TTCTAGCTCTAAAACGTGACAGTGGCGATTCCAGGCTGAAACCGCTGCGG	construction of psgRNA-marA3	This study
marA sgRNA_N20-3	CCGCAGCGGTTTCAGCCTGGAATCGCCACTGTCACGTTTTAGAGCTAGAA	construction of psgRNA-marA3	This study
marA sgRNA_com-4	TTCTAGCTCTAAAACGGAATCGCCACTGTCACTGGCTGAAACCGCTGCGG	construction of psgRNA-marA4	This study
marA sgRNA_N20-4	CCGCAGCGGTTTCAGCCAGTGACAGTGGCGATTCCGTTTTAGAGCTAGAA	construction of psgRNA-marA4	This study
marA sgRNA_com-5	TTCTAGCTCTAAAACAACGCTCTGACACTTTCTCCCTGAAACCGCTGCGG	construction of psgRNA-marA5	This study
marA sgRNA_N20-5	CCGCAGCGGTTTCAGGGAGAAAGTGTCAGAGCGTTGTTTTAGAGCTAGAA	construction of psgRNA-marA5	This study
marA sgRNA_com-6	TTCTAGCTCTAAAACGAACGCTCTGACACTTTCTCCTGAAACCGCTGCGG	construction of psgRNA-marA6	This study
marA sgRNA_N20-6	CCGCAGCGGTTTCAGGAGAAAGTGTCAGAGCGTTCGTTTTAGAGCTAGAA	construction of psgRNA-marA6	This study
marA sgRNA_com-7	TTCTAGCTCTAAAACTTTGGAGTAACCCGAACGCTCTGAAACCGCTGCGG	construction of psgRNA-marA7	This study
marA sgRNA_N20-7	CCGCAGCGGTTTCAGAGCGTTCGGGTTACTCCAAAGTTTTAGAGCTAGAA	construction of psgRNA-marA7	This study
marA sgRNA_com-8	TTCTAGCTCTAAAACTTGCAGGTGCCATTTGGAGTCTGAAACCGCTGCGG	construction of psgRNA-marA8	This study
marA sgRNA_N20-8	CCGCAGCGGTTTCAGACTCCAAATGGCACCTGCAAGTTTTAGAGCTAGAA	construction of psgRNA-marA8	This study
marA sgRNA_com-9	TTCTAGCTCTAAAACAATGGCACCTGCAACGGATGCTGAAACCGCTGCGG	construction of psgRNA-marA9	This study
marA sgRNA_N20-9	CCGCAGCGGTTTCAGCATCCGTTGCAGGTGCCATTGTTTTAGAGCTAGAA	construction of psgRNA-marA9	This study
mglA_psgRNA_N20_com-01	GCTATTTCTAGCTCTAAAACGAGGACGGAGTCGTTGAGCTCTGAAACCGCTGCGGCGATG	construction of psgRNA-mglA1	This study
mglA_psgRNA_N20-01	CATCGCCGCAGCGGTTTCAGAGCTCAACGACTCCGTCCTCGTTTTAGAGCTAGAAATAGC	construction of psgRNA-mglA1	This study
mglA_psgRNA_N20_com-02	GCTATTTCTAGCTCTAAAACGGAGGACGGAGTCGTTGAGCCTGAAACCGCTGCGGCGATG	construction of psgRNA-mglA2	This study
mglA_psgRNA_N20-02	CATCGCCGCAGCGGTTTCAGGCTCAACGACTCCGTCCTCCGTTTTAGAGCTAGAAATAGC	construction of psgRNA-mglA2	This study
mglA_psgRNA_N20_com-03	GCTATTTCTAGCTCTAAAACCGGAGGACGGAGTCGTTGAGCTGAAACCGCTGCGGCGATG	construction of psgRNA-mglA3	This study
mglA_psgRNA_N20-03	CATCGCCGCAGCGGTTTCAGCTCAACGACTCCGTCCTCCGGTTTTAGAGCTAGAAATAGC	construction of psgRNA-mglA3	This study
mglB_psgRNA_N20_com-01	GCTATTTCTAGCTCTAAAACTCACAGCAGACAGGGTTAACCTGAAACCGCTGCGGCGATG	construction of psgRNA-mglB1	This study
mglB_psgRNA_N20-01	CATCGCCGCAGCGGTTTCAGGTTAACCCTGTCTGCTGTGAGTTTTAGAGCTAGAAATAGC	construction of psgRNA-mglB1	This study
mglB_psgRNA_N20_com-02	GCTATTTCTAGCTCTAAAACTGTCTGCTGTGATGGCCAGCCTGAAACCGCTGCGGCGATG	construction of psgRNA-mglB2	This study
mglB_psgRNA_N20-02	CATCGCCGCAGCGGTTTCAGGCTGGCCATCACAGCAGACAGTTTTAGAGCTAGAAATAGC	construction of psgRNA-mglB2	This study
mglB_psgRNA_N20_com-03	GCTATTTCTAGCTCTAAAACGTCTGCTGTGATGGCCAGCACTGAAACCGCTGCGGCGATG	construction of psgRNA-mglB3	This study
mglB_psgRNA_N20-03	CATCGCCGCAGCGGTTTCAGTGCTGGCCATCACAGCAGACGTTTTAGAGCTAGAAATAGC	construction of psgRNA-mglB3	This study
mglC_psgRNA_N20_com-01	GCTATTTCTAGCTCTAAAACCTTTCAGGTAAGTAAGAAAACTGAAACCGCTGCGGCGATG	construction of psgRNA-mglC1	This study
mglC_psgRNA_N20-01	CATCGCCGCAGCGGTTTCAGTTTTCTTACTTACCTGAAAGGTTTTAGAGCTAGAAATAGC	construction of psgRNA-mglC1	This study
mglC_psgRNA_N20_com-02	GCTATTTCTAGCTCTAAAACTCTTTCAGGTAAGTAAGAAACTGAAACCGCTGCGGCGATG	construction of psgRNA-mglC2	This study
mglC_psgRNA_N20-02	CATCGCCGCAGCGGTTTCAGTTTCTTACTTACCTGAAAGAGTTTTAGAGCTAGAAATAGC	construction of psgRNA-mglC2	This study
mglC_psgRNA_N20_com-03	GCTATTTCTAGCTCTAAAACCCCTCTTTCAGGTAAGTAAGCTGAAACCGCTGCGGCGATG	construction of psgRNA-mglC3	This study
mglC_psgRNA_N20-03	CATCGCCGCAGCGGTTTCAGCTTACTTACCTGAAAGAGGGGTTTTAGAGCTAGAAATAGC	construction of psgRNA-mglC3	This study
mqo_psgRNA_N20_com-04	GCTATTTCTAGCTCTAAAACTCGAGAAGAGCATGGCAGTCCTGAAACCGCTGCGGCGATG	construction of psgRNA-mqo4	This study
mqo_psgRNA_N20-04	CATCGCCGCAGCGGTTTCAGGACTGCCATGCTCTTCTCGAGTTTTAGAGCTAGAAATAGC	construction of psgRNA-mqo4	This study
mqo_psgRNA_N20_com-05	GCTATTTCTAGCTCTAAAACTGCTCTTCTCGATGGCCGTGCTGAAACCGCTGCGGCGATG	construction of psgRNA-mqo5	This study
mqo_psgRNA_N20-05	CATCGCCGCAGCGGTTTCAGCACGGCCATCGAGAAGAGCAGTTTTAGAGCTAGAAATAGC	construction of psgRNA-mqo5	This study
mqo_psgRNA_N20_com-06	GCTATTTCTAGCTCTAAAACCGGCCATCGAGAAGAGCATGCTGAAACCGCTGCGGCGATG	construction of psgRNA-mqo6	This study
mqo_psgRNA_N20-06	CATCGCCGCAGCGGTTTCAGCATGCTCTTCTCGATGGCCGGTTTTAGAGCTAGAAATAGC	construction of psgRNA-mqo6	This study
mtgA_psgRNA_N20_com-01	GCTATTTCTAGCTCTAAAACTTAAGCGGCTTTTACTCATTCTGAAACCGCTGCGGCGATG	construction of psgRNA-mtgA1	This study
mtgA_psgRNA_N20-01	CATCGCCGCAGCGGTTTCAGAATGAGTAAAAGCCGCTTAAGTTTTAGAGCTAGAAATAGC	construction of psgRNA-mtgA1	This study
mtgA_psgRNA_N20_com-02	GCTATTTCTAGCTCTAAAACCTTAACGGTGTTTAGTTTCGCTGAAACCGCTGCGGCGATG	construction of psgRNA-mtgA2	This study
mtgA_psgRNA_N20-02	CATCGCCGCAGCGGTTTCAGCGAAACTAAACACCGTTAAGGTTTTAGAGCTAGAAATAGC	construction of psgRNA-mtgA2	This study
mtgA_psgRNA_N20_com-03	GCTATTTCTAGCTCTAAAACTTTTCTTTTGCGGTTAATGGCTGAAACCGCTGCGGCGATG	construction of psgRNA-mtgA3	This study
mtgA_psgRNA_N20-03	CATCGCCGCAGCGGTTTCAGCCATTAACCGCAAAAGAAAAGTTTTAGAGCTAGAAATAGC	construction of psgRNA-mtgA3	This study
nagK_psgRNA_N20_com-01	GCTATTTCTAGCTCTAAAACATATCAAACCCGTAATACATCTGAAACCGCTGCGGCGATG	construction of psgRNA-nagK1	This study
nagK_psgRNA_N20-01	CATCGCCGCAGCGGTTTCAGATGTATTACGGGTTTGATATGTTTTAGAGCTAGAAATAGC	construction of psgRNA-nagK1	This study
nagK_psgRNA_N20-10	CATCGCCGCAGCGGTTTCAGTCATAGCTGTCACGCGGTGTGTTTTAGAGCTAGAAATAGC	construction of psgRNA-nagK10-1	This study
nagK_psgRNA_N20_com-10	GCTATTTCTAGCTCTAAAACACACCGCGTGACAGCTATGACTGAAACCGCTGCGGCGATG	construction of psgRNA-nagK10-1	This study
nagK_psgRNA_N20-11	CATCGCCGCAGCGGTTTCAGAATGCGTCATAGCTGTCACGGTTTTAGAGCTAGAAATAGC	construction of psgRNA-nagK11-1	This study
nagK_psgRNA_N20_com-11	GCTATTTCTAGCTCTAAAACCGTGACAGCTATGACGCATTCTGAAACCGCTGCGGCGATG	construction of psgRNA-nagK11-1	This study
nagK_psgRNA_N20-12	CATCGCCGCAGCGGTTTCAGTTTAGATGCAGTGTGTGAGCGTTTTAGAGCTAGAAATAGC	construction of psgRNA-nagK12-1	This study
nagK_psgRNA_N20_com-12	GCTATTTCTAGCTCTAAAACGCTCACACACTGCATCTAAACTGAAACCGCTGCGGCGATG	construction of psgRNA-nagK12-1	This study
nagK_psgRNA_N20_com-02	GCTATTTCTAGCTCTAAAACCCAATATCAAACCCGTAATACTGAAACCGCTGCGGCGATG	construction of psgRNA-nagK2	This study
nagK_psgRNA_N20-02	CATCGCCGCAGCGGTTTCAGTATTACGGGTTTGATATTGGGTTTTAGAGCTAGAAATAGC	construction of psgRNA-nagK2	This study
nagK_psgRNA_N20_com-03	GCTATTTCTAGCTCTAAAACAGCGCAATTTTTGTTCCACCCTGAAACCGCTGCGGCGATG	construction of psgRNA-nagK3	This study
nagK_psgRNA_N20-03	CATCGCCGCAGCGGTTTCAGGGTGGAACAAAAATTGCGCTGTTTTAGAGCTAGAAATAGC	construction of psgRNA-nagK3	This study
nagK_psgRNA_N20_com-04	GCTATTTCTAGCTCTAAAACCTATCAAACACGCCAAGCGCCTGAAACCGCTGCGGCGATG	construction of psgRNA-nagK4	This study
nagK_psgRNA_N20-04	CATCGCCGCAGCGGTTTCAGGCGCTTGGCGTGTTTGATAGGTTTTAGAGCTAGAAATAGC	construction of psgRNA-nagK4	This study
nagK_psgRNA_N20-05	CATCGCCGCAGCGGTTTCAGTTGGCGTGTTTGATAGCGGTGTTTTAGAGCTAGAAATAGC	construction of psgRNA-nagK5	This study
nagK_psgRNA_N20_com-05	GCTATTTCTAGCTCTAAAACACCGCTATCAAACACGCCAACTGAAACCGCTGCGGCGATG	construction of psgRNA-nagK5	This study
nagK_psgRNA_N20-06	CATCGCCGCAGCGGTTTCAGATAGCGGTCGGCAGTTGCAGGTTTTAGAGCTAGAAATAGC	construction of psgRNA-nagK6	This study
nagK_psgRNA_N20_com-06	GCTATTTCTAGCTCTAAAACCTGCAACTGCCGACCGCTATCTGAAACCGCTGCGGCGATG	construction of psgRNA-nagK6	This study
nagK_psgRNA_N20-07	CATCGCCGCAGCGGTTTCAGTAGCGGTCGGCAGTTGCAGTGTTTTAGAGCTAGAAATAGC	construction of psgRNA-nagK7	This study
nagK_psgRNA_N20_com-07	GCTATTTCTAGCTCTAAAACACTGCAACTGCCGACCGCTACTGAAACCGCTGCGGCGATG	construction of psgRNA-nagK7	This study
nagK_psgRNA_N20-08	CATCGCCGCAGCGGTTTCAGGGCAGTTGCAGTGGGAAAAGGTTTTAGAGCTAGAAATAGC	construction of psgRNA-nagK8	This study
nagK_psgRNA_N20_com-08	GCTATTTCTAGCTCTAAAACCTTTTCCCACTGCAACTGCCCTGAAACCGCTGCGGCGATG	construction of psgRNA-nagK8	This study
nagK_psgRNA_N20-09	CATCGCCGCAGCGGTTTCAGGCAGTTGCAGTGGGAAAAGCGTTTTAGAGCTAGAAATAGC	construction of psgRNA-nagK9-1	This study
nagK_psgRNA_N20_com-09	GCTATTTCTAGCTCTAAAACGCTTTTCCCACTGCAACTGCCTGAAACCGCTGCGGCGATG	construction of psgRNA-nagK9-1	This study
nanE_psgRNA_N20_com-01	GCTATTTCTAGCTCTAAAACTTAGCAGCGATTTTTTGATCCTGAAACCGCTGCGGCGATG	construction of psgRNA-nanE1	This study
nanE_psgRNA_N20-01	CATCGCCGCAGCGGTTTCAGGATCAAAAAATCGCTGCTAAGTTTTAGAGCTAGAAATAGC	construction of psgRNA-nanE1	This study
nanE_psgRNA_N20-10	CATCGCCGCAGCGGTTTCAGCGATTTCGGGTTTATCGAGCGTTTTAGAGCTAGAAATAGC	construction of psgRNA-nanE10-2	This study
nanE_psgRNA_N20_com-10	GCTATTTCTAGCTCTAAAACGCTCGATAAACCCGAAATCGCTGAAACCGCTGCGGCGATG	construction of psgRNA-nanE10-2	This study
nanE_psgRNA_N20-11	CATCGCCGCAGCGGTTTCAGACGATTTCGGGTTTATCGAGGTTTTAGAGCTAGAAATAGC	construction of psgRNA-nanE11-1	This study
nanE_psgRNA_N20_com-11	GCTATTTCTAGCTCTAAAACCTCGATAAACCCGAAATCGTCTGAAACCGCTGCGGCGATG	construction of psgRNA-nanE11-1	This study
nanE_psgRNA_N20-12	CATCGCCGCAGCGGTTTCAGACCCGAAATCGTCGCCGCCAGTTTTAGAGCTAGAAATAGC	construction of psgRNA-nanE12-1	This study
nanE_psgRNA_N20_com-12	GCTATTTCTAGCTCTAAAACTGGCGGCGACGATTTCGGGTCTGAAACCGCTGCGGCGATG	construction of psgRNA-nanE12-1	This study
nanE_psgRNA_N20_com-02	GCTATTTCTAGCTCTAAAACCCGTTAGCAGCGATTTTTTGCTGAAACCGCTGCGGCGATG	construction of psgRNA-nanE2	This study
nanE_psgRNA_N20-02	CATCGCCGCAGCGGTTTCAGCAAAAAATCGCTGCTAACGGGTTTTAGAGCTAGAAATAGC	construction of psgRNA-nanE2	This study
nanE_psgRNA_N20_com-03	GCTATTTCTAGCTCTAAAACGCTGGCAGGAGACAATCAGGCTGAAACCGCTGCGGCGATG	construction of psgRNA-nanE3	This study
nanE_psgRNA_N20-03	CATCGCCGCAGCGGTTTCAGCCTGATTGTCTCCTGCCAGCGTTTTAGAGCTAGAAATAGC	construction of psgRNA-nanE3	This study
nanE_psgRNA_N20_com-04	GCTATTTCTAGCTCTAAAACGAACCGGCTGGCAGGAGACACTGAAACCGCTGCGGCGATG	construction of psgRNA-nanE4	This study
nanE_psgRNA_N20-04	CATCGCCGCAGCGGTTTCAGTGTCTCCTGCCAGCCGGTTCGTTTTAGAGCTAGAAATAGC	construction of psgRNA-nanE4	This study
nanE_psgRNA_N20-05	CATCGCCGCAGCGGTTTCAGGCTGTCCGGAACCGGCTGGCGTTTTAGAGCTAGAAATAGC	construction of psgRNA-nanE5	This study
nanE_psgRNA_N20_com-05	GCTATTTCTAGCTCTAAAACGCCAGCCGGTTCCGGACAGCCTGAAACCGCTGCGGCGATG	construction of psgRNA-nanE5	This study
nanE_psgRNA_N20-06	CATCGCCGCAGCGGTTTCAGGCGGGCTGTCCGGAACCGGCGTTTTAGAGCTAGAAATAGC	construction of psgRNA-nanE6	This study
nanE_psgRNA_N20_com-06	GCTATTTCTAGCTCTAAAACGCCGGTTCCGGACAGCCCGCCTGAAACCGCTGCGGCGATG	construction of psgRNA-nanE6	This study
nanE_psgRNA_N20-07	CATCGCCGCAGCGGTTTCAGTCGAGCGGGCTGTCCGGAACGTTTTAGAGCTAGAAATAGC	construction of psgRNA-nanE7	This study
nanE_psgRNA_N20_com-07	GCTATTTCTAGCTCTAAAACGTTCCGGACAGCCCGCTCGACTGAAACCGCTGCGGCGATG	construction of psgRNA-nanE7	This study
nanE_psgRNA_N20-08	CATCGCCGCAGCGGTTTCAGGGTTTATCGAGCGGGCTGTCGTTTTAGAGCTAGAAATAGC	construction of psgRNA-nanE8	This study
nanE_psgRNA_N20_com-08	GCTATTTCTAGCTCTAAAACGACAGCCCGCTCGATAAACCCTGAAACCGCTGCGGCGATG	construction of psgRNA-nanE8	This study
nanE_psgRNA_N20-09	CATCGCCGCAGCGGTTTCAGCCGGCTGGCAGGAGACAATCGTTTTAGAGCTAGAAATAGC	construction of psgRNA-nanE9-2	This study
nanE_psgRNA_N20_com-09	GCTATTTCTAGCTCTAAAACGATTGTCTCCTGCCAGCCGGCTGAAACCGCTGCGGCGATG	construction of psgRNA-nanE9-2	This study
narL_sgRNA_com-1	TTCTAGCTCTAAAACGTTCGCAGCATCGGGTGATCCTGAAACCGCTGCGG	construction of psgRNA-narL1-17	This study
narL_sgRNA_N20-1	CCGCAGCGGTTTCAGGATCACCCGATGCTGCGAACGTTTTAGAGCTAGAA	construction of psgRNA-narL1-17	This study
narL_sgRNA_com-2	TTCTAGCTCTAAAACGATGCTGCGAACTGGCGTAACTGAAACCGCTGCGG	construction of psgRNA-narL2-17	This study
narL_sgRNA_N20-2	CCGCAGCGGTTTCAGTTACGCCAGTTCGCAGCATCGTTTTAGAGCTAGAA	construction of psgRNA-narL2-17	This study
narL_sgRNA_com-3	TTCTAGCTCTAAAACTACTGATAAGCTGTTTTACGCTGAAACCGCTGCGG	construction of psgRNA-narL3-25	This study
narL_sgRNA_N20-3	CCGCAGCGGTTTCAGCGTAAAACAGCTTATCAGTAGTTTTAGAGCTAGAA	construction of psgRNA-narL3-25	This study
narP_sgRNA_com-1	TTCTAGCTCTAAAACCTTCAGAGCCAGGATCAAGCCTGAAACCGCTGCGG	construction of psgRNA-narP1-24	This study
narP_sgRNA_N20-1	CCGCAGCGGTTTCAGGCTTGATCCTGGCTCTGAAGGTTTTAGAGCTAGAA	construction of psgRNA-narP1-24	This study
narP_sgRNA_com-2	TTCTAGCTCTAAAACGACCGTATCCGATGCCTCCACTGAAACCGCTGCGG	construction of psgRNA-narP2-12	This study
narP_sgRNA_N20-2	CCGCAGCGGTTTCAGTGGAGGCATCGGATACGGTCGTTTTAGAGCTAGAA	construction of psgRNA-narP2-12	This study
narP_sgRNA_com-3	TTCTAGCTCTAAAACGCACGAATCGCTTCCAGCAACTGAAACCGCTGCGG	construction of psgRNA-narP3-2	This study
narP_sgRNA_N20-3	CCGCAGCGGTTTCAGTTGCTGGAAGCGATTCGTGCGTTTTAGAGCTAGAA	construction of psgRNA-narP3-2	This study
narP_sgRNA_com-4	TTCTAGCTCTAAAACCGTCGCATAAGTGGATGATCCTGAAACCGCTGCGG	construction of psgRNA-narP4-22	This study
narP_sgRNA_N20-4	CCGCAGCGGTTTCAGGATCATCCACTTATGCGACGGTTTTAGAGCTAGAA	construction of psgRNA-narP4-22	This study
narP_sgRNA_com-5	TTCTAGCTCTAAAACCTTATGCGACGCGGTGTTCGCTGAAACCGCTGCGG	construction of psgRNA-narP5-5	This study
narP_sgRNA_N20-5	CCGCAGCGGTTTCAGCGAACACCGCGTCGCATAAGGTTTTAGAGCTAGAA	construction of psgRNA-narP5-5	This study
narP_sgRNA_com-6	TTCTAGCTCTAAAACGTAACTGACGAACACCGCGTCTGAAACCGCTGCGG	construction of psgRNA-narP6-23	This study
narP_sgRNA_N20-6	CCGCAGCGGTTTCAGACGCGGTGTTCGTCAGTTACGTTTTAGAGCTAGAA	construction of psgRNA-narP6-23	This study
narP_sgRNA_com-7	TTCTAGCTCTAAAACGGATCAAGCTCCAGTAACTGCTGAAACCGCTGCGG	construction of psgRNA-narP7-3	This study
narP_sgRNA_N20-7	CCGCAGCGGTTTCAGCAGTTACTGGAGCTTGATCCGTTTTAGAGCTAGAA	construction of psgRNA-narP7-3	This study
narP_sgRNA_com-8	TTCTAGCTCTAAAACGGCTCTGAAGTGGTCGCCGACTGAAACCGCTGCGG	construction of psgRNA-narP8-2	This study
narP_sgRNA_N20-8	CCGCAGCGGTTTCAGTCGGCGACCACTTCAGAGCCGTTTTAGAGCTAGAA	construction of psgRNA-narP8-2	This study
narP_sgRNA_com-9	TTCTAGCTCTAAAACCTTCGGCGACCACTTCAGAGCTGAAACCGCTGCGG	construction of psgRNA-narP9-1	This study
narP_sgRNA_N20-9	CCGCAGCGGTTTCAGCTCTGAAGTGGTCGCCGAAGGTTTTAGAGCTAGAA	construction of psgRNA-narP9-1	This study
narQ_sgRNA_com	TTCTAGCTCTAAAACGATCGCTGCGTATGCAGAGTCTGAAACCGCTGCGG	construction of psgRNA-narQ-13	This study
narQ_sgRNA_N20	CCGCAGCGGTTTCAGACTCTGCATACGCAGCGATCGTTTTAGAGCTAGAA	construction of psgRNA-narQ-13	This study
narQ_sgRNA_com-2	TTCTAGCTCTAAAACCAGAGCGAAAGCTAATACTCCTGAAACCGCTGCGG	construction of psgRNA-narQ-35	This study
narQ_sgRNA_N20-2	CCGCAGCGGTTTCAGGAGTATTAGCTTTCGCTCTGGTTTTAGAGCTAGAA	construction of psgRNA-narQ-35	This study
narQ_sgRNA_com-1	TTCTAGCTCTAAAACGGCCAGACTGGCCGAGACGGCTGAAACCGCTGCGG	construction of psgRNA-narQ1-2	This study
narQ_sgRNA_N20-1	CCGCAGCGGTTTCAGCCGTCTCGGCCAGTCTGGCCGTTTTAGAGCTAGAA	construction of psgRNA-narQ1-2	This study
narQ_sgRNA_com-2	TTCTAGCTCTAAAACGGGCCAGACTGGCCGAGACGCTGAAACCGCTGCGG	construction of psgRNA-narQ2-1	This study
narQ_sgRNA_N20-2	CCGCAGCGGTTTCAGCGTCTCGGCCAGTCTGGCCCGTTTTAGAGCTAGAA	construction of psgRNA-narQ2-1	This study
narQ_sgRNA_com-3	TTCTAGCTCTAAAACGTCTGGCCCGGGCCTTTTTTCTGAAACCGCTGCGG	construction of psgRNA-narQ3-1	This study
narQ_sgRNA_N20-3	CCGCAGCGGTTTCAGAAAAAAGGCCCGGGCCAGACGTTTTAGAGCTAGAA	construction of psgRNA-narQ3-1	This study
narQ_sgRNA_com-3 a	TTCTAGCTCTAAAACCCAGCCAGGGAAATCGCCACCTGAAACCGCTGCGG	construction of psgRNA-narQ3-41	This study
narQ_sgRNA_N20-3 a	CCGCAGCGGTTTCAGGTGGCGATTTCCCTGGCTGGGTTTTAGAGCTAGAA	construction of psgRNA-narQ3-41	This study
narQ_sgRNA_com-4 a	TTCTAGCTCTAAAACGGCTGGCGGCATCGGTATTTCTGAAACCGCTGCGG	construction of psgRNA-narQ4-2	This study
narQ_sgRNA_N20-4 a	CCGCAGCGGTTTCAGAAATACCGATGCCGCCAGCCGTTTTAGAGCTAGAA	construction of psgRNA-narQ4-2	This study
narQ_sgRNA_com-5 a	TTCTAGCTCTAAAACTGGCTGGCGGCATCGGTATTCTGAAACCGCTGCGG	construction of psgRNA-narQ5-18	This study
narQ_sgRNA_N20-5 a	CCGCAGCGGTTTCAGAATACCGATGCCGCCAGCCAGTTTTAGAGCTAGAA	construction of psgRNA-narQ5-18	This study
narQ_sgRNA_com-6 a	TTCTAGCTCTAAAACTAAACCGTCTCTTGCATTGTCTGAAACCGCTGCGG	construction of psgRNA-narQ6-29	This study
narQ_sgRNA_N20-6 a	CCGCAGCGGTTTCAGACAATGCAAGAGACGGTTTAGTTTTAGAGCTAGAA	construction of psgRNA-narQ6-29	This study
narX_sgRNA_com-1	TTCTAGCTCTAAAACGATTAACCAGGGTGAGCGGACTGAAACCGCTGCGG	construction of psgRNA-narX1-2	This study
narX_sgRNA_N20-1	CCGCAGCGGTTTCAGTCCGCTCACCCTGGTTAATCGTTTTAGAGCTAGAA	construction of psgRNA-narX1-2	This study
narX_sgRNA_com-2	TTCTAGCTCTAAAACTGGTTAATCAGGTTGCGCTTCTGAAACCGCTGCGG	construction of psgRNA-narX2-1	This study
narX_sgRNA_N20-2	CCGCAGCGGTTTCAGAAGCGCAACCTGATTAACCAGTTTTAGAGCTAGAA	construction of psgRNA-narX2-1	This study
narX_sgRNA_com-3	TTCTAGCTCTAAAACGGTTAATCAGGTTGCGCTTACTGAAACCGCTGCGG	construction of psgRNA-narX3-8	This study
narX_sgRNA_N20-3	CCGCAGCGGTTTCAGTAAGCGCAACCTGATTAACCGTTTTAGAGCTAGAA	construction of psgRNA-narX3-8	This study
narXL_sgRNA_com	TTCTAGCTCTAAAACGGAAGCCAAATTTGGCGCTGCTGAAACCGCTGCGG	construction of psgRNA-narXL-15	This study
narXL_sgRNA_N20	CCGCAGCGGTTTCAGCAGCGCCAAATTTGGCTTCCGTTTTAGAGCTAGAA	construction of psgRNA-narXL-15	This study
narXL_sgRNA_com-2	TTCTAGCTCTAAAACCGCGAGACTTGAGCTTCATTCTGAAACCGCTGCGG	construction of psgRNA-narXL-17	This study
narXL_sgRNA_N20-2	CCGCAGCGGTTTCAGAATGAAGCTCAAGTCTCGCGGTTTTAGAGCTAGAA	construction of psgRNA-narXL-17	This study
nikA_sgRNA_com-２	TTCTAGCTCTAAAACCCGCACTCTATTTGCGCTGCCTGAAACCGCTGCGG	construction of psgRNA-nikA2-8	This study
nikA_sgRNA_N20-２	CCGCAGCGGTTTCAGGCAGCGCAAATAGAGTGCGGGTTTTAGAGCTAGAA	construction of psgRNA-nikA2-8	This study
nikC_psgRNA_N20_com-01	GCTATTTCTAGCTCTAAAACGCGGGAAGAGAGGAAAAAGTCTGAAACCGCTGCGGCGATG	construction of psgRNA-nikC1	This study
nikC_psgRNA_N20-01	CATCGCCGCAGCGGTTTCAGACTTTTTCCTCTCTTCCCGCGTTTTAGAGCTAGAAATAGC	construction of psgRNA-nikC1	This study
nikC_psgRNA_N20_com-02	GCTATTTCTAGCTCTAAAACACCAGCGGGAAGAGAGGAAACTGAAACCGCTGCGGCGATG	construction of psgRNA-nikC2	This study
nikC_psgRNA_N20-02	CATCGCCGCAGCGGTTTCAGTTTCCTCTCTTCCCGCTGGTGTTTTAGAGCTAGAAATAGC	construction of psgRNA-nikC2	This study
nikC_psgRNA_N20_com-03	GCTATTTCTAGCTCTAAAACCTCTTCCCGCTGGTCGGTACCTGAAACCGCTGCGGCGATG	construction of psgRNA-nikC3	This study
nikC_psgRNA_N20-03	CATCGCCGCAGCGGTTTCAGGTACCGACCAGCGGGAAGAGGTTTTAGAGCTAGAAATAGC	construction of psgRNA-nikC3	This study
nikD_psgRNA_N20_com-01	GCTATTTCTAGCTCTAAAACCAACAGATTGAACTACGTAACTGAAACCGCTGCGGCGATG	construction of psgRNA-nikD1	This study
nikD_psgRNA_N20-01	CATCGCCGCAGCGGTTTCAGTTACGTAGTTCAATCTGTTGGTTTTAGAGCTAGAAATAGC	construction of psgRNA-nikD1	This study
nikD_psgRNA_N20_com-02	GCTATTTCTAGCTCTAAAACGTAGCGCGATATTACGTAGTCTGAAACCGCTGCGGCGATG	construction of psgRNA-nikD2	This study
nikD_psgRNA_N20-02	CATCGCCGCAGCGGTTTCAGACTACGTAATATCGCGCTACGTTTTAGAGCTAGAAATAGC	construction of psgRNA-nikD2	This study
nikE_psgRNA_N20_com-01	GCTATTTCTAGCTCTAAAACGAGATGTTAAGTAAAGTCATCTGAAACCGCTGCGGCGATG	construction of psgRNA-nikE1	This study
nikE_psgRNA_N20-01	CATCGCCGCAGCGGTTTCAGATGACTTTACTTAACATCTCGTTTTAGAGCTAGAAATAGC	construction of psgRNA-nikE1	This study
nikE_psgRNA_N20_com-02	GCTATTTCTAGCTCTAAAACGCCTTTCCCATCACTATGCGCTGAAACCGCTGCGGCGATG	construction of psgRNA-nikE2	This study
nikE_psgRNA_N20-02	CATCGCCGCAGCGGTTTCAGCGCATAGTGATGGGAAAGGCGTTTTAGAGCTAGAAATAGC	construction of psgRNA-nikE2	This study
nikE_psgRNA_N20_com-03	GCTATTTCTAGCTCTAAAACTTCCCATCACTATGCGCACGCTGAAACCGCTGCGGCGATG	construction of psgRNA-nikE3	This study
nikE_psgRNA_N20-03	CATCGCCGCAGCGGTTTCAGCGTGCGCATAGTGATGGGAAGTTTTAGAGCTAGAAATAGC	construction of psgRNA-nikE3	This study
nikR_sgRNA_com_1	TTCTAGCTCTAAAACGCGTCTCCAGTAAATCGTCACTGAAACCGCTGCGG	construction of psgRNA-nikR1-15	This study
nikR_sgRNA_N20_1	CCGCAGCGGTTTCAGTGACGATTTACTGGAGACGCGTTTTAGAGCTAGAA	construction of psgRNA-nikR1-15	This study
nikR_sgRNA_com-2	TTCTAGCTCTAAAACCGACGCTGGCTCAGGCTGTCCTGAAACCGCTGCGG	construction of psgRNA-nikR2-12	This study
nikR_sgRNA_N20-2	CCGCAGCGGTTTCAGGACAGCCTGAGCCAGCGTCGGTTTTAGAGCTAGAA	construction of psgRNA-nikR2-12	This study
nikR_sgRNA_com-3	TTCTAGCTCTAAAACGAGCCAGCGTCGTGGTTATACTGAAACCGCTGCGG	construction of psgRNA-nikR3-16	This study
nikR_sgRNA_N20-3	CCGCAGCGGTTTCAGTATAACCACGACGCTGGCTCGTTTTAGAGCTAGAA	construction of psgRNA-nikR3-16	This study
glnL_sgRNA_com-1	TTCTAGCTCTAAAACCAACTCGCTGATTAACAGTACTGAAACCGCTGCGG	construction of psgRNA-ntrB1-2	This study
glnL_sgRNA_N20-1	CCGCAGCGGTTTCAGTACTGTTAATCAGCGAGTTGGTTTTAGAGCTAGAA	construction of psgRNA-ntrB1-2	This study
glnL_sgRNA_com-2	TTCTAGCTCTAAAACGGTTGTCATCGATTAACAAACTGAAACCGCTGCGG	construction of psgRNA-ntrB2-3	This study
glnL_sgRNA_N20-2	CCGCAGCGGTTTCAGTTTGTTAATCGATGACAACCGTTTTAGAGCTAGAA	construction of psgRNA-ntrB2-3	This study
glnL_sgRNA_com-3	TTCTAGCTCTAAAACGGCGATCCATTACGCCAACCCTGAAACCGCTGCGG	construction of psgRNA-ntrB3-3	This study
glnL_sgRNA_N20-3	CCGCAGCGGTTTCAGGGTTGGCGTAATGGATCGCCGTTTTAGAGCTAGAA	construction of psgRNA-ntrB3-3	This study
ntrC_sgRNA_com-1	TTCTAGCTCTAAAACTTGGGTGCTTGAACGTGCGCCTGAAACCGCTGCGG	construction of psgRNA-ntrC1-10	This study
ntrC_sgRNA_N20-1	CCGCAGCGGTTTCAGGCGCACGTTCAAGCACCCAAGTTTTAGAGCTAGAA	construction of psgRNA-ntrC1-10	This study
ntrC_sgRNA_com-2	TTCTAGCTCTAAAACGCGAGCGCACGTTCAAGCACCTGAAACCGCTGCGG	construction of psgRNA-ntrC2-4	This study
ntrC_sgRNA_N20-2	CCGCAGCGGTTTCAGGTGCTTGAACGTGCGCTCGCGTTTTAGAGCTAGAA	construction of psgRNA-ntrC2-4	This study
ntrC_sgRNA_com-3	TTCTAGCTCTAAAACCAGCGAGCGCACGTTCAAGCCTGAAACCGCTGCGG	construction of psgRNA-ntrC3-2	This study
ntrC_sgRNA_N20-3	CCGCAGCGGTTTCAGGCTTGAACGTGCGCTCGCTGGTTTTAGAGCTAGAA	construction of psgRNA-ntrC3-2	This study
ntrC_psgRNA_N20_com-04	GCTATTTCTAGCTCTAAAACGCATACGGATATCTGAAAGCCTGAAACCGCTGCGGCGATG	construction of psgRNA-ntrC4	This study
ntrC_psgRNA_N20-04	CATCGCCGCAGCGGTTTCAGGCTTTCAGATATCCGTATGCGTTTTAGAGCTAGAAATAGC	construction of psgRNA-ntrC4	This study
ntrC_psgRNA_N20_com-05	GCTATTTCTAGCTCTAAAACGGCATACGGATATCTGAAAGCTGAAACCGCTGCGGCGATG	construction of psgRNA-ntrC5	This study
ntrC_psgRNA_N20-05	CATCGCCGCAGCGGTTTCAGCTTTCAGATATCCGTATGCCGTTTTAGAGCTAGAAATAGC	construction of psgRNA-ntrC5	This study
ntrC_psgRNA_N20_com-06	GCTATTTCTAGCTCTAAAACTATGCCGGGAATGGACGGGCCTGAAACCGCTGCGGCGATG	construction of psgRNA-ntrC6	This study
ntrC_psgRNA_N20-06	CATCGCCGCAGCGGTTTCAGGCCCGTCCATTCCCGGCATAGTTTTAGAGCTAGAAATAGC	construction of psgRNA-ntrC6	This study
ntrC_psgRNA_N20_com-07	GCTATTTCTAGCTCTAAAACGGAATGGACGGGCTGGCGCTCTGAAACCGCTGCGGCGATG	construction of psgRNA-ntrC7	This study
ntrC_psgRNA_N20-07	CATCGCCGCAGCGGTTTCAGAGCGCCAGCCCGTCCATTCCGTTTTAGAGCTAGAAATAGC	construction of psgRNA-ntrC7	This study
ompA1_sgRNA_com	TTCTAGCTCTAAAACTGACACTGGTTTCATCAACACTGAAACCGCTGCGG	construction of psgRNA-ompA1-14	This study
ompA1_sgRNA_N20	CCGCAGCGGTTTCAGTGTTGATGAAACCAGTGTCAGTTTTAGAGCTAGAA	construction of psgRNA-ompA1-14	This study
ompA2_sgRNA_com	TTCTAGCTCTAAAACTTGTACGGCATACGACCTAACTGAAACCGCTGCGG	construction of psgRNA-ompA2-29	This study
ompA2_sgRNA_N20	CCGCAGCGGTTTCAGTTAGGTCGTATGCCGTACAAGTTTTAGAGCTAGAA	construction of psgRNA-ompA2-29	This study
ompA3a_sgRNA_com	TTCTAGCTCTAAAACTAAACGTTGGATTTAGTGTCCTGAAACCGCTGCGG	construction of psgRNA-ompA3a	This study
ompA3a_sgRNA_N20	CCGCAGCGGTTTCAGGACACTAAATCCAACGTTTAGTTTTAGAGCTAGAA	construction of psgRNA-ompA3a	This study
ompA3b_sgRNA_com	TTCTAGCTCTAAAACACGTTTATGGTAAAAACCACCTGAAACCGCTGCGG	construction of psgRNA-ompA3b	This study
ompA3b_sgRNA_N20	CCGCAGCGGTTTCAGGTGGTTTTTACCATAAACGTGTTTTAGAGCTAGAA	construction of psgRNA-ompA3b	This study
ompA4c_sgRNA_com	TTCTAGCTCTAAAACATGGTGTGTGCGTCACCGATCTGAAACCGCTGCGG	construction of psgRNA-ompA4c	This study
ompA4c_sgRNA_N20	CCGCAGCGGTTTCAGATCGGTGACGCACACACCATGTTTTAGAGCTAGAA	construction of psgRNA-ompA4c	This study
ompA4e_sgRNA_com	TTCTAGCTCTAAAACTCGGCACTCGTCCGGACAACCTGAAACCGCTGCGG	construction of psgRNA-ompA4e	This study
ompA4e_sgRNA_N20	CCGCAGCGGTTTCAGGTTGTCCGGACGAGTGCCGAGTTTTAGAGCTAGAA	construction of psgRNA-ompA4e	This study
ompC_psgRNA_N20_com-01	GCTATTTCTAGCTCTAAAACTCTGTTATATGCCTTTATTTCTGAAACCGCTGCGGCGATG	construction of psgRNA-ompC1	This study
ompC_psgRNA_N20-01	CATCGCCGCAGCGGTTTCAGAAATAAAGGCATATAACAGAGTTTTAGAGCTAGAAATAGC	construction of psgRNA-ompC1	This study
ompC_psgRNA_N20_com-10	GCTATTTCTAGCTCTAAAACGTCAGCTGGTCAGTAACCTGCTGAAACCGCTGCGGCGATG	construction of psgRNA-ompC10	This study
ompC_psgRNA_N20-10	CATCGCCGCAGCGGTTTCAGCAGGTTACTGACCAGCTGACGTTTTAGAGCTAGAAATAGC	construction of psgRNA-ompC10	This study
ompC_psgRNA_N20_com-11	GCTATTTCTAGCTCTAAAACTAACCGGTCAGCTGGTCAGTCTGAAACCGCTGCGGCGATG	construction of psgRNA-ompC11	This study
ompC_psgRNA_N20-11	CATCGCCGCAGCGGTTTCAGACTGACCAGCTGACCGGTTAGTTTTAGAGCTAGAAATAGC	construction of psgRNA-ompC11	This study
ompC_psgRNA_N20_com-12	GCTATTTCTAGCTCTAAAACGCTGACCGGTTACGGCCAGTCTGAAACCGCTGCGGCGATG	construction of psgRNA-ompC12	This study
ompC_psgRNA_N20-12	CATCGCCGCAGCGGTTTCAGACTGGCCGTAACCGGTCAGCGTTTTAGAGCTAGAAATAGC	construction of psgRNA-ompC12	This study
ompC_psgRNA_N20_com-13	GCTATTTCTAGCTCTAAAACGGAGTTGTTTTCGTTTTCAGCTGAAACCGCTGCGGCGATG	construction of psgRNA-ompC13	This study
ompC_psgRNA_N20-13	CATCGCCGCAGCGGTTTCAGCTGAAAACGAAAACAACTCCGTTTTAGAGCTAGAAATAGC	construction of psgRNA-ompC13	This study
ompC_psgRNA_N20_com-14	GCTATTTCTAGCTCTAAAACCACGGGTCCAGGAGTTGTTTCTGAAACCGCTGCGGCGATG	construction of psgRNA-ompC14	This study
ompC_psgRNA_N20-14	CATCGCCGCAGCGGTTTCAGAAACAACTCCTGGACCCGTGGTTTTAGAGCTAGAAATAGC	construction of psgRNA-ompC14	This study
ompC_psgRNA_N20_com-15	GCTATTTCTAGCTCTAAAACGGACCCGTGTGGCATTCGCACTGAAACCGCTGCGGCGATG	construction of psgRNA-ompC15	This study
ompC_psgRNA_N20-15	CATCGCCGCAGCGGTTTCAGTGCGAATGCCACACGGGTCCGTTTTAGAGCTAGAAATAGC	construction of psgRNA-ompC15	This study
ompC_psgRNA_N20_com-16	GCTATTTCTAGCTCTAAAACGTGTGGCATTCGCAGGTCTGCTGAAACCGCTGCGGCGATG	construction of psgRNA-ompC16	This study
ompC_psgRNA_N20-16	CATCGCCGCAGCGGTTTCAGCAGACCTGCGAATGCCACACGTTTTAGAGCTAGAAATAGC	construction of psgRNA-ompC16	This study
ompC_psgRNA_N20_com-17	GCTATTTCTAGCTCTAAAACGGATGTGGGTTCTTTCGACTCTGAAACCGCTGCGGCGATG	construction of psgRNA-ompC17	This study
ompC_psgRNA_N20-17	CATCGCCGCAGCGGTTTCAGAGTCGAAAGAACCCACATCCGTTTTAGAGCTAGAAATAGC	construction of psgRNA-ompC17	This study
ompC_psgRNA_N20_com-18	GCTATTTCTAGCTCTAAAACGGAAGTTACGTCATAAACAACTGAAACCGCTGCGGCGATG	construction of psgRNA-ompC18	This study
ompC_psgRNA_N20-18	CATCGCCGCAGCGGTTTCAGTTGTTTATGACGTAACTTCCGTTTTAGAGCTAGAAATAGC	construction of psgRNA-ompC18	This study
ompC_psgRNA_N20_com-19	GCTATTTCTAGCTCTAAAACGGACCGACGTACTGCCAGAACTGAAACCGCTGCGGCGATG	construction of psgRNA-ompC19	This study
ompC_psgRNA_N20-19	CATCGCCGCAGCGGTTTCAGTTCTGGCAGTACGTCGGTCCGTTTTAGAGCTAGAAATAGC	construction of psgRNA-ompC19	This study
ompC_psgRNA_N20_com-02	GCTATTTCTAGCTCTAAAACGGAGGGACAGTACTTTAACTCTGAAACCGCTGCGGCGATG	construction of psgRNA-ompC2	This study
ompC_psgRNA_N20-02	CATCGCCGCAGCGGTTTCAGAGTTAAAGTACTGTCCCTCCGTTTTAGAGCTAGAAATAGC	construction of psgRNA-ompC2	This study
ompC_psgRNA_N20_com-20	GCTATTTCTAGCTCTAAAACACGTACTGCCAGAATTCGGTCTGAAACCGCTGCGGCGATG	construction of psgRNA-ompC20	This study
ompC_psgRNA_N20-20	CATCGCCGCAGCGGTTTCAGACCGAATTCTGGCAGTACGTGTTTTAGAGCTAGAAATAGC	construction of psgRNA-ompC20	This study
ompC_psgRNA_N20_com-21	GCTATTTCTAGCTCTAAAACCGCTGCTGCATGAAGTTGTCCTGAAACCGCTGCGGCGATG	construction of psgRNA-ompC21	This study
ompC_psgRNA_N20-21	CATCGCCGCAGCGGTTTCAGGACAACTTCATGCAGCAGCGGTTTTAGAGCTAGAAATAGC	construction of psgRNA-ompC21	This study
ompC_psgRNA_N20_com-22	GCTATTTCTAGCTCTAAAACTTACCACGCTGCTGCATGAACTGAAACCGCTGCGGCGATG	construction of psgRNA-ompC22	This study
ompC_psgRNA_N20-22	CATCGCCGCAGCGGTTTCAGTTCATGCAGCAGCGTGGTAAGTTTTAGAGCTAGAAATAGC	construction of psgRNA-ompC22	This study
ompC_psgRNA_N20_com-23	GCTATTTCTAGCTCTAAAACACCGTAACACTGACTTCTTCCTGAAACCGCTGCGGCGATG	construction of psgRNA-ompC23	This study
ompC_psgRNA_N20-23	CATCGCCGCAGCGGTTTCAGGAAGAAGTCAGTGTTACGGTGTTTTAGAGCTAGAAATAGC	construction of psgRNA-ompC23	This study
ompC_psgRNA_N20_com-24	GCTATTTCTAGCTCTAAAACTAACACTGACTTCTTCGGTCCTGAAACCGCTGCGGCGATG	construction of psgRNA-ompC24	This study
ompC_psgRNA_N20-24	CATCGCCGCAGCGGTTTCAGGACCGAAGAAGTCAGTGTTAGTTTTAGAGCTAGAAATAGC	construction of psgRNA-ompC24	This study
ompC_psgRNA_N20_com-25	GCTATTTCTAGCTCTAAAACTTTTTACCCTGGTACTGAACCTGAAACCGCTGCGGCGATG	construction of psgRNA-ompC25	This study
ompC_psgRNA_N20-25	CATCGCCGCAGCGGTTTCAGGTTCAGTACCAGGGTAAAAAGTTTTAGAGCTAGAAATAGC	construction of psgRNA-ompC25	This study
ompC_psgRNA_N20_com-26	GCTATTTCTAGCTCTAAAACGGGTAAAAACGGCAACCCATCTGAAACCGCTGCGGCGATG	construction of psgRNA-ompC26	This study
ompC_psgRNA_N20-26	CATCGCCGCAGCGGTTTCAGATGGGTTGCCGTTTTTACCCGTTTTAGAGCTAGAAATAGC	construction of psgRNA-ompC26	This study
ompC_psgRNA_N20_com-27	GCTATTTCTAGCTCTAAAACGATGGGTTGCCGTTTTTACCCTGAAACCGCTGCGGCGATG	construction of psgRNA-ompC27	This study
ompC_psgRNA_N20-27	CATCGCCGCAGCGGTTTCAGGGTAAAAACGGCAACCCATCGTTTTAGAGCTAGAAATAGC	construction of psgRNA-ompC27	This study
ompC_psgRNA_N20_com-28	GCTATTTCTAGCTCTAAAACTCACCAGATGGGTTGCCGTTCTGAAACCGCTGCGGCGATG	construction of psgRNA-ompC28	This study
ompC_psgRNA_N20-28	CATCGCCGCAGCGGTTTCAGAACGGCAACCCATCTGGTGAGTTTTAGAGCTAGAAATAGC	construction of psgRNA-ompC28	This study
ompC_psgRNA_N20_com-29	GCTATTTCTAGCTCTAAAACTTTTGACGCAGTGCGTCACGCTGAAACCGCTGCGGCGATG	construction of psgRNA-ompC29	This study
ompC_psgRNA_N20-29	CATCGCCGCAGCGGTTTCAGCGTGACGCACTGCGTCAAAAGTTTTAGAGCTAGAAATAGC	construction of psgRNA-ompC29	This study
ompC_psgRNA_N20_com-03	GCTATTTCTAGCTCTAAAACTCCTGGTCCCAGCTCTGCTGCTGAAACCGCTGCGGCGATG	construction of psgRNA-ompC3	This study
ompC_psgRNA_N20-03	CATCGCCGCAGCGGTTTCAGCAGCAGAGCTGGGACCAGGAGTTTTAGAGCTAGAAATAGC	construction of psgRNA-ompC3	This study
ompC_psgRNA_N20_com-30	GCTATTTCTAGCTCTAAAACTCGCCGTTTTGACGCAGTGCCTGAAACCGCTGCGGCGATG	construction of psgRNA-ompC30	This study
ompC_psgRNA_N20-30	CATCGCCGCAGCGGTTTCAGGCACTGCGTCAAAACGGCGAGTTTTAGAGCTAGAAATAGC	construction of psgRNA-ompC30	This study
ompC_psgRNA_N20_com-31	GCTATTTCTAGCTCTAAAACACGCCGTCGCCGTTTTGACGCTGAAACCGCTGCGGCGATG	construction of psgRNA-ompC31	This study
ompC_psgRNA_N20-31	CATCGCCGCAGCGGTTTCAGCGTCAAAACGGCGACGGCGTGTTTTAGAGCTAGAAATAGC	construction of psgRNA-ompC31	This study
ompC_psgRNA_N20_com-32	GCTATTTCTAGCTCTAAAACCCGACGCCGTCGCCGTTTTGCTGAAACCGCTGCGGCGATG	construction of psgRNA-ompC32-1	This study
ompC_psgRNA_N20-32	CATCGCCGCAGCGGTTTCAGCAAAACGGCGACGGCGTCGGGTTTTAGAGCTAGAAATAGC	construction of psgRNA-ompC32-1	This study
ompC_psgRNA_N20_com-33	GCTATTTCTAGCTCTAAAACGCTCCAAACGTACTGATGCTCTGAAACCGCTGCGGCGATG	construction of psgRNA-ompC33	This study
ompC_psgRNA_N20-33	CATCGCCGCAGCGGTTTCAGAGCATCAGTACGTTTGGAGCGTTTTAGAGCTAGAAATAGC	construction of psgRNA-ompC33	This study
ompC_psgRNA_N20_com-34	GCTATTTCTAGCTCTAAAACAACGTACTGATGCTCAGAACCTGAAACCGCTGCGGCGATG	construction of psgRNA-ompC34	This study
ompC_psgRNA_N20-34	CATCGCCGCAGCGGTTTCAGGTTCTGAGCATCAGTACGTTGTTTTAGAGCTAGAAATAGC	construction of psgRNA-ompC34	This study
ompC_psgRNA_N20_com-35	GCTATTTCTAGCTCTAAAACATGTAAGCAGCGGTGTTCTGCTGAAACCGCTGCGGCGATG	construction of psgRNA-ompC35	This study
ompC_psgRNA_N20-35	CATCGCCGCAGCGGTTTCAGCAGAACACCGCTGCTTACATGTTTTAGAGCTAGAAATAGC	construction of psgRNA-ompC35	This study
ompC_psgRNA_N20_com-37	GCTATTTCTAGCTCTAAAACACACTGGTGGTCTGAAATACCTGAAACCGCTGCGGCGATG	construction of psgRNA-ompC37	This study
ompC_psgRNA_N20-37	CATCGCCGCAGCGGTTTCAGGTATTTCAGACCACCAGTGTGTTTTAGAGCTAGAAATAGC	construction of psgRNA-ompC37	This study
ompC_psgRNA_N20_com-38	GCTATTTCTAGCTCTAAAACGGCTGCTCAGTACACCCAGACTGAAACCGCTGCGGCGATG	construction of psgRNA-ompC38	This study
ompC_psgRNA_N20-38	CATCGCCGCAGCGGTTTCAGTCTGGGTGTACTGAGCAGCCGTTTTAGAGCTAGAAATAGC	construction of psgRNA-ompC38	This study
ompC_psgRNA_N20_com-39	GCTATTTCTAGCTCTAAAACAGACCTACAACGCAACTCGCCTGAAACCGCTGCGGCGATG	construction of psgRNA-ompC39	This study
ompC_psgRNA_N20-39	CATCGCCGCAGCGGTTTCAGGCGAGTTGCGTTGTAGGTCTGTTTTAGAGCTAGAAATAGC	construction of psgRNA-ompC39	This study
ompC_psgRNA_N20_com-04	GCTATTTCTAGCTCTAAAACGCAGAGCTGGGACCAGGAGGCTGAAACCGCTGCGGCGATG	construction of psgRNA-ompC4	This study
ompC_psgRNA_N20-04	CATCGCCGCAGCGGTTTCAGCCTCCTGGTCCCAGCTCTGCGTTTTAGAGCTAGAAATAGC	construction of psgRNA-ompC4	This study
ompC_psgRNA_N20_com-40	GCTATTTCTAGCTCTAAAACGACCTACAACGCAACTCGCGCTGAAACCGCTGCGGCGATG	construction of psgRNA-ompC40	This study
ompC_psgRNA_N20-40	CATCGCCGCAGCGGTTTCAGCGCGAGTTGCGTTGTAGGTCGTTTTAGAGCTAGAAATAGC	construction of psgRNA-ompC40	This study
ompC_psgRNA_N20_com-41	GCTATTTCTAGCTCTAAAACACCCAGGGAACCTACGCGAGCTGAAACCGCTGCGGCGATG	construction of psgRNA-ompC41	This study
ompC_psgRNA_N20-41	CATCGCCGCAGCGGTTTCAGCTCGCGTAGGTTCCCTGGGTGTTTTAGAGCTAGAAATAGC	construction of psgRNA-ompC41	This study
ompC_psgRNA_N20_com-42	GCTATTTCTAGCTCTAAAACAACCCAGGGAACCTACGCGACTGAAACCGCTGCGGCGATG	construction of psgRNA-ompC42	This study
ompC_psgRNA_N20-42	CATCGCCGCAGCGGTTTCAGTCGCGTAGGTTCCCTGGGTTGTTTTAGAGCTAGAAATAGC	construction of psgRNA-ompC42	This study
ompC_psgRNA_N20_com-43	GCTATTTCTAGCTCTAAAACTGGGTTGGGCGAACAAAGCACTGAAACCGCTGCGGCGATG	construction of psgRNA-ompC43	This study
ompC_psgRNA_N20-43	CATCGCCGCAGCGGTTTCAGTGCTTTGTTCGCCCAACCCAGTTTTAGAGCTAGAAATAGC	construction of psgRNA-ompC43	This study
ompC_psgRNA_N20_com-44	GCTATTTCTAGCTCTAAAACGGGTTGGGCGAACAAAGCACCTGAAACCGCTGCGGCGATG	construction of psgRNA-ompC44	This study
ompC_psgRNA_N20-44	CATCGCCGCAGCGGTTTCAGGTGCTTTGTTCGCCCAACCCGTTTTAGAGCTAGAAATAGC	construction of psgRNA-ompC44	This study
ompC_psgRNA_N20_com-45	GCTATTTCTAGCTCTAAAACAGGTTTTTACCTTTAGACTGCTGAAACCGCTGCGGCGATG	construction of psgRNA-ompC45-1	This study
ompC_psgRNA_N20-45	CATCGCCGCAGCGGTTTCAGCAGTCTAAAGGTAAAAACCTGTTTTAGAGCTAGAAATAGC	construction of psgRNA-ompC45-1	This study
ompC_psgRNA_N20_com-46	GCTATTTCTAGCTCTAAAACGGGTCGTGGCTACGACGACGCTGAAACCGCTGCGGCGATG	construction of psgRNA-ompC46	This study
ompC_psgRNA_N20-46	CATCGCCGCAGCGGTTTCAGCGTCGTCGTAGCCACGACCCGTTTTAGAGCTAGAAATAGC	construction of psgRNA-ompC46	This study
ompC_psgRNA_N20_com-47	GCTATTTCTAGCTCTAAAACACATCAACATATTTCAGGATCTGAAACCGCTGCGGCGATG	construction of psgRNA-ompC47	This study
ompC_psgRNA_N20-47	CATCGCCGCAGCGGTTTCAGATCCTGAAATATGTTGATGTGTTTTAGAGCTAGAAATAGC	construction of psgRNA-ompC47	This study
ompC_psgRNA_N20_com-48	GCTATTTCTAGCTCTAAAACGAAATATGTTGATGTTGGTGCTGAAACCGCTGCGGCGATG	construction of psgRNA-ompC48	This study
ompC_psgRNA_N20-48	CATCGCCGCAGCGGTTTCAGCACCAACATCAACATATTTCGTTTTAGAGCTAGAAATAGC	construction of psgRNA-ompC48	This study
ompC_psgRNA_N20_com-49	GCTATTTCTAGCTCTAAAACGCTGGACGACAACCAGTTCACTGAAACCGCTGCGGCGATG	construction of psgRNA-ompC49	This study
ompC_psgRNA_N20-49	CATCGCCGCAGCGGTTTCAGTGAACTGGTTGTCGTCCAGCGTTTTAGAGCTAGAAATAGC	construction of psgRNA-ompC49	This study
ompC_psgRNA_N20_com-05	GCTATTTCTAGCTCTAAAACTCTTTGTTGTAAACTTCAGCCTGAAACCGCTGCGGCGATG	construction of psgRNA-ompC5	This study
ompC_psgRNA_N20-05	CATCGCCGCAGCGGTTTCAGGCTGAAGTTTACAACAAAGAGTTTTAGAGCTAGAAATAGC	construction of psgRNA-ompC5	This study
ompC_psgRNA_N20_com-50	GCTATTTCTAGCTCTAAAACGCGTCACGAGTGAACTGGTTCTGAAACCGCTGCGGCGATG	construction of psgRNA-ompC50	This study
ompC_psgRNA_N20-50	CATCGCCGCAGCGGTTTCAGAACCAGTTCACTCGTGACGCGTTTTAGAGCTAGAAATAGC	construction of psgRNA-ompC50	This study
ompC_psgRNA_N20_com-51	GCTATTTCTAGCTCTAAAACGAGCTACGATGTTATCAGTGCTGAAACCGCTGCGGCGATG	construction of psgRNA-ompC51	This study
ompC_psgRNA_N20-51	CATCGCCGCAGCGGTTTCAGCACTGATAACATCGTAGCTCGTTTTAGAGCTAGAAATAGC	construction of psgRNA-ompC51	This study
ompC_psgRNA_N20_com-52	GCTATTTCTAGCTCTAAAACAGAGCTACGATGTTATCAGTCTGAAACCGCTGCGGCGATG	construction of psgRNA-ompC52	This study
ompC_psgRNA_N20-52	CATCGCCGCAGCGGTTTCAGACTGATAACATCGTAGCTCTGTTTTAGAGCTAGAAATAGC	construction of psgRNA-ompC52	This study
ompC_psgRNA_N20_com-53	GCTATTTCTAGCTCTAAAACCAGGCCCTTTGTTCGATATCCTGAAACCGCTGCGGCGATG	construction of psgRNA-ompC53	This study
ompC_psgRNA_N20-53	CATCGCCGCAGCGGTTTCAGGATATCGAACAAAGGGCCTGGTTTTAGAGCTAGAAATAGC	construction of psgRNA-ompC53	This study
ompC_psgRNA_N20_com-54	GCTATTTCTAGCTCTAAAACGCAGGCCCTTTGTTCGATATCTGAAACCGCTGCGGCGATG	construction of psgRNA-ompC54	This study
ompC_psgRNA_N20-54	CATCGCCGCAGCGGTTTCAGATATCGAACAAAGGGCCTGCGTTTTAGAGCTAGAAATAGC	construction of psgRNA-ompC54	This study
ompC_psgRNA_N20_com-55	GCTATTTCTAGCTCTAAAACGCGGGCCCTTTTTTCATTGTCTGAAACCGCTGCGGCGATG	construction of psgRNA-ompC55	This study
ompC_psgRNA_N20-55	CATCGCCGCAGCGGTTTCAGACAATGAAAAAAGGGCCCGCGTTTTAGAGCTAGAAATAGC	construction of psgRNA-ompC55	This study
ompC_psgRNA_N20_com-56	GCTATTTCTAGCTCTAAAACTTTTTTCATTGTTTTCAGCGCTGAAACCGCTGCGGCGATG	construction of psgRNA-ompC56	This study
ompC_psgRNA_N20-56	CATCGCCGCAGCGGTTTCAGCGCTGAAAACAATGAAAAAAGTTTTAGAGCTAGAAATAGC	construction of psgRNA-ompC56	This study
ompC_psgRNA_N20_com-06	GCTATTTCTAGCTCTAAAACTCTACTTTACCGTACAGATCCTGAAACCGCTGCGGCGATG	construction of psgRNA-ompC6	This study
ompC_psgRNA_N20-06	CATCGCCGCAGCGGTTTCAGGATCTGTACGGTAAAGTAGAGTTTTAGAGCTAGAAATAGC	construction of psgRNA-ompC6	This study
ompC6d_sgRNA_com	CCGCAGCGGTTTCAGACCTACAACGCAACTCGCGTGTTTTAGAGCTAGAA	construction of psgRNA-ompC6d-4	This study
ompC6d_sgRNA_N20	TTCTAGCTCTAAAACACGCGAGTTGCGTTGTAGGTCTGAAACCGCTGCGG	construction of psgRNA-ompC6d-4	This study
ompC_psgRNA_N20_com-07	GCTATTTCTAGCTCTAAAACGCACTATTTCTCTGACAACACTGAAACCGCTGCGGCGATG	construction of psgRNA-ompC7	This study
ompC_psgRNA_N20-07	CATCGCCGCAGCGGTTTCAGTGTTGTCAGAGAAATAGTGCGTTTTAGAGCTAGAAATAGC	construction of psgRNA-ompC7	This study
ompC7h_sgRNA_com	TTCTAGCTCTAAAACCGACCCAGGTTTTTACCTTTCTGAAACCGCTGCGG	construction of psgRNA-ompC7h-1	This study
ompC7h_sgRNA_N20	CCGCAGCGGTTTCAGAAAGGTAAAAACCTGGGTCGGTTTTAGAGCTAGAA	construction of psgRNA-ompC7h-1	This study
ompC_psgRNA_N20_com-08	GCTATTTCTAGCTCTAAAACTCTACATCTTTGTTGTCAGACTGAAACCGCTGCGGCGATG	construction of psgRNA-ompC8	This study
ompC_psgRNA_N20-08	CATCGCCGCAGCGGTTTCAGTCTGACAACAAAGATGTAGAGTTTTAGAGCTAGAAATAGC	construction of psgRNA-ompC8	This study
ompC8f_sgRNA_com	CCGCAGCGGTTTCAGTGCCAGCGTCACGAGTGAACGTTTTAGAGCTAGAA	construction of psgRNA-ompC8f-2	This study
ompC8f_sgRNA_N20	TTCTAGCTCTAAAACGTTCACTCGTGACGCTGGCACTGAAACCGCTGCGG	construction of psgRNA-ompC8f-2	This study
ompC_psgRNA_N20_com-09	GCTATTTCTAGCTCTAAAACCTCAAAGTGGAAACTTCGGTCTGAAACCGCTGCGGCGATG	construction of psgRNA-ompC9-2	This study
ompC_psgRNA_N20-09	CATCGCCGCAGCGGTTTCAGTGGCTTCAAAGGTGAAACTCGTTTTAGAGCTAGAAATAGC	construction of psgRNA-ompC9-2	This study
ompF_psgRNA_N20_com-01	GCTATTTCTAGCTCTAAAACACAGCTTTACCGTACAGATCCTGAAACCGCTGCGGCGATG	construction of psgRNA-ompF1	This study
ompF_psgRNA_N20-01	CATCGCCGCAGCGGTTTCAGGATCTGTACGGTAAAGCTGTGTTTTAGAGCTAGAAATAGC	construction of psgRNA-ompF1	This study
ompF_psgRNA_N20_com-10	GCTATTTCTAGCTCTAAAACTCAGAGTTGTTACCCTGGAACTGAAACCGCTGCGGCGATG	construction of psgRNA-ompF10	This study
ompF_psgRNA_N20-10	CATCGCCGCAGCGGTTTCAGTTCCAGGGTAACAACTCTGAGTTTTAGAGCTAGAAATAGC	construction of psgRNA-ompF10	This study
ompF_psgRNA_N20_com-11	GCTATTTCTAGCTCTAAAACGTTTGAGCGTCAGCGCCTTCCTGAAACCGCTGCGGCGATG	construction of psgRNA-ompF11	This study
ompF_psgRNA_N20-11	CATCGCCGCAGCGGTTTCAGGAAGGCGCTGACGCTCAAACGTTTTAGAGCTAGAAATAGC	construction of psgRNA-ompF11	This study
ompF_psgRNA_N20_com-12	GCTATTTCTAGCTCTAAAACCGAATGCCAGACGCGTTTTGCTGAAACCGCTGCGGCGATG	construction of psgRNA-ompF12	This study
ompF_psgRNA_N20-12	CATCGCCGCAGCGGTTTCAGCAAAACGCGTCTGGCATTCGGTTTTAGAGCTAGAAATAGC	construction of psgRNA-ompF12	This study
ompF_psgRNA_N20_com-13	GCTATTTCTAGCTCTAAAACACGTCAGCGTATTTAAGACCCTGAAACCGCTGCGGCGATG	construction of psgRNA-ompF13	This study
ompF_psgRNA_N20-13	CATCGCCGCAGCGGTTTCAGGGTCTTAAATACGCTGACGTGTTTTAGAGCTAGAAATAGC	construction of psgRNA-ompF13	This study
ompF_psgRNA_N20_com-15	GCTATTTCTAGCTCTAAAACTAACTACGGTGTGGTTTATGCTGAAACCGCTGCGGCGATG	construction of psgRNA-ompF15	This study
ompF_psgRNA_N20-15	CATCGCCGCAGCGGTTTCAGCATAAACCACACCGTAGTTAGTTTTAGAGCTAGAAATAGC	construction of psgRNA-ompF15	This study
ompF_psgRNA_N20_com-16	GCTATTTCTAGCTCTAAAACAGTGCATCATAAACCACACCCTGAAACCGCTGCGGCGATG	construction of psgRNA-ompF16	This study
ompF_psgRNA_N20-16	CATCGCCGCAGCGGTTTCAGGGTGTGGTTTATGATGCACTGTTTTAGAGCTAGAAATAGC	construction of psgRNA-ompF16	This study
ompF_psgRNA_N20_com-17	GCTATTTCTAGCTCTAAAACGAATTTGGTGGTGATACTGCCTGAAACCGCTGCGGCGATG	construction of psgRNA-ompF17	This study
ompF_psgRNA_N20-17	CATCGCCGCAGCGGTTTCAGGCAGTATCACCACCAAATTCGTTTTAGAGCTAGAAATAGC	construction of psgRNA-ompF17	This study
ompF_psgRNA_N20_com-19	GCTATTTCTAGCTCTAAAACACACGACCAACGAAGAAGTCCTGAAACCGCTGCGGCGATG	construction of psgRNA-ompF19	This study
ompF_psgRNA_N20-19	CATCGCCGCAGCGGTTTCAGGACTTCTTCGTTGGTCGTGTGTTTTAGAGCTAGAAATAGC	construction of psgRNA-ompF19	This study
ompF_psgRNA_N20_com-02	GCTATTTCTAGCTCTAAAACTTGGAAAAATAATGCAGACCCTGAAACCGCTGCGGCGATG	construction of psgRNA-ompF2	This study
ompF_psgRNA_N20-02	CATCGCCGCAGCGGTTTCAGGGTCTGCATTATTTTTCCAAGTTTTAGAGCTAGAAATAGC	construction of psgRNA-ompF2	This study
ompF_psgRNA_N20_com-20	GCTATTTCTAGCTCTAAAACATCGTAACTCCAACTTCTTTCTGAAACCGCTGCGGCGATG	construction of psgRNA-ompF20	This study
ompF_psgRNA_N20-20	CATCGCCGCAGCGGTTTCAGAAAGAAGTTGGAGTTACGATGTTTTAGAGCTAGAAATAGC	construction of psgRNA-ompF20	This study
ompF_psgRNA_N20_com-21	GCTATTTCTAGCTCTAAAACGACCAAAGAAGTTGGAGTTACTGAAACCGCTGCGGCGATG	construction of psgRNA-ompF21	This study
ompF_psgRNA_N20-21	CATCGCCGCAGCGGTTTCAGTAACTCCAACTTCTTTGGTCGTTTTAGAGCTAGAAATAGC	construction of psgRNA-ompF21	This study
ompF_psgRNA_N20_com-23	GCTATTTCTAGCTCTAAAACGGGTAAAAACGAGCGTGACACTGAAACCGCTGCGGCGATG	construction of psgRNA-ompF23	This study
ompF_psgRNA_N20-23	CATCGCCGCAGCGGTTTCAGTGTCACGCTCGTTTTTACCCGTTTTAGAGCTAGAAATAGC	construction of psgRNA-ompF23	This study
ompF_psgRNA_N20_com-24	GCTATTTCTAGCTCTAAAACTTAGAACGGCGTGCAGTGTCCTGAAACCGCTGCGGCGATG	construction of psgRNA-ompF24	This study
ompF_psgRNA_N20-24	CATCGCCGCAGCGGTTTCAGGACACTGCACGCCGTTCTAAGTTTTAGAGCTAGAAATAGC	construction of psgRNA-ompF24	This study
ompF_psgRNA_N20_com-25	GCTATTTCTAGCTCTAAAACTCGCCGTTAGAACGGCGTGCCTGAAACCGCTGCGGCGATG	construction of psgRNA-ompF25	This study
ompF_psgRNA_N20-25	CATCGCCGCAGCGGTTTCAGGCACGCCGTTCTAACGGCGAGTTTTAGAGCTAGAAATAGC	construction of psgRNA-ompF25	This study
ompF_psgRNA_N20_com-26	GCTATTTCTAGCTCTAAAACACACCGTCGCCGTTAGAACGCTGAAACCGCTGCGGCGATG	construction of psgRNA-ompF26	This study
ompF_psgRNA_N20-26	CATCGCCGCAGCGGTTTCAGCGTTCTAACGGCGACGGTGTGTTTTAGAGCTAGAAATAGC	construction of psgRNA-ompF26	This study
ompF_psgRNA_N20_com-27	GCTATTTCTAGCTCTAAAACTCGTATTCGTAGCTGATAGACTGAAACCGCTGCGGCGATG	construction of psgRNA-ompF27	This study
ompF_psgRNA_N20-27	CATCGCCGCAGCGGTTTCAGTCTATCAGCTACGAATACGAGTTTTAGAGCTAGAAATAGC	construction of psgRNA-ompF27	This study
ompF_psgRNA_N20_com-28	GCTATTTCTAGCTCTAAAACACGATACCAAAGCCTTCGTACTGAAACCGCTGCGGCGATG	construction of psgRNA-ompF28	This study
ompF_psgRNA_N20-28	CATCGCCGCAGCGGTTTCAGTACGAAGGCTTTGGTATCGTGTTTTAGAGCTAGAAATAGC	construction of psgRNA-ompF28	This study
ompF_psgRNA_N20_com-29	GCTATTTCTAGCTCTAAAACTACCAACCTGCAAGAAGCTCCTGAAACCGCTGCGGCGATG	construction of psgRNA-ompF29	This study
ompF_psgRNA_N20-29	CATCGCCGCAGCGGTTTCAGGAGCTTCTTGCAGGTTGGTAGTTTTAGAGCTAGAAATAGC	construction of psgRNA-ompF29	This study
ompF_psgRNA_N20_com-03	GCTATTTCTAGCTCTAAAACAGGGTAACGGTGAAAACAGTCTGAAACCGCTGCGGCGATG	construction of psgRNA-ompF3	This study
ompF_psgRNA_N20-03	CATCGCCGCAGCGGTTTCAGACTGTTTTCACCGTTACCCTGTTTTAGAGCTAGAAATAGC	construction of psgRNA-ompF3	This study
ompF_psgRNA_N20_com-30	GCTATTTCTAGCTCTAAAACGCAAGAAGCTCAACCTCTTGCTGAAACCGCTGCGGCGATG	construction of psgRNA-ompF30	This study
ompF_psgRNA_N20-30	CATCGCCGCAGCGGTTTCAGCAAGAGGTTGAGCTTCTTGCGTTTTAGAGCTAGAAATAGC	construction of psgRNA-ompF30	This study
ompF_psgRNA_N20_com-31	GCTATTTCTAGCTCTAAAACCTGTTCAGCTTTTTTACCGTCTGAAACCGCTGCGGCGATG	construction of psgRNA-ompF31	This study
ompF_psgRNA_N20-31	CATCGCCGCAGCGGTTTCAGACGGTAAAAAAGCTGAACAGGTTTTAGAGCTAGAAATAGC	construction of psgRNA-ompF31	This study
ompF_psgRNA_N20_com-32	GCTATTTCTAGCTCTAAAACGTAGCCCACTGTTCAGCTTTCTGAAACCGCTGCGGCGATG	construction of psgRNA-ompF32	This study
ompF_psgRNA_N20-32	CATCGCCGCAGCGGTTTCAGAAAGCTGAACAGTGGGCTACGTTTTAGAGCTAGAAATAGC	construction of psgRNA-ompF32	This study
ompF_psgRNA_N20_com-33	GCTATTTCTAGCTCTAAAACTAGTTCGCTGCCAGGTAGATCTGAAACCGCTGCGGCGATG	construction of psgRNA-ompF33	This study
ompF_psgRNA_N20-33	CATCGCCGCAGCGGTTTCAGATCTACCTGGCAGCGAACTAGTTTTAGAGCTAGAAATAGC	construction of psgRNA-ompF33	This study
ompF_psgRNA_N20_com-34	GCTATTTCTAGCTCTAAAACGTAACGCTACGCCGATCACTCTGAAACCGCTGCGGCGATG	construction of psgRNA-ompF34	This study
ompF_psgRNA_N20-34	CATCGCCGCAGCGGTTTCAGAGTGATCGGCGTAGCGTTACGTTTTAGAGCTAGAAATAGC	construction of psgRNA-ompF34	This study
ompF_psgRNA_N20_com-35	GCTATTTCTAGCTCTAAAACATCACTAATAAATTTACAAACTGAAACCGCTGCGGCGATG	construction of psgRNA-ompF35	This study
ompF_psgRNA_N20-35	CATCGCCGCAGCGGTTTCAGTTTGTAAATTTATTAGTGATGTTTTAGAGCTAGAAATAGC	construction of psgRNA-ompF35	This study
ompF_psgRNA_N20_com-36	GCTATTTCTAGCTCTAAAACGCGGCTTCGCCAACAAAACGCTGAAACCGCTGCGGCGATG	construction of psgRNA-ompF36	This study
ompF_psgRNA_N20-36	CATCGCCGCAGCGGTTTCAGCGTTTTGTTGGCGAAGCCGCGTTTTAGAGCTAGAAATAGC	construction of psgRNA-ompF36	This study
ompF_psgRNA_N20_com-37	GCTATTTCTAGCTCTAAAACACAAAACGCAAGACGTTCTGCTGAAACCGCTGCGGCGATG	construction of psgRNA-ompF37	This study
ompF_psgRNA_N20-37	CATCGCCGCAGCGGTTTCAGCAGAACGTCTTGCGTTTTGTGTTTTAGAGCTAGAAATAGC	construction of psgRNA-ompF37	This study
ompF_psgRNA_N20_com-38	GCTATTTCTAGCTCTAAAACTCCATCGCTTACACCAAATCCTGAAACCGCTGCGGCGATG	construction of psgRNA-ompF38	This study
ompF_psgRNA_N20-38	CATCGCCGCAGCGGTTTCAGGATTTGGTGTAAGCGATGGAGTTTTAGAGCTAGAAATAGC	construction of psgRNA-ompF38	This study
ompF_psgRNA_N20_com-39	GCTATTTCTAGCTCTAAAACAATCTAAAGCGAAAGACGTACTGAAACCGCTGCGGCGATG	construction of psgRNA-ompF39	This study
ompF_psgRNA_N20-39	CATCGCCGCAGCGGTTTCAGTACGTCTTTCGCTTTAGATTGTTTTAGAGCTAGAAATAGC	construction of psgRNA-ompF39	This study
ompF_psgRNA_N20_com-04	GCTATTTCTAGCTCTAAAACCCGTAACTGTTTTCACCGTTCTGAAACCGCTGCGGCGATG	construction of psgRNA-ompF4	This study
ompF_psgRNA_N20-04	CATCGCCGCAGCGGTTTCAGAACGGTGAAAACAGTTACGGGTTTTAGAGCTAGAAATAGC	construction of psgRNA-ompF4	This study
ompF_psgRNA_N20_com-40	GCTATTTCTAGCTCTAAAACATACCTTCTACGTCTTTCGCCTGAAACCGCTGCGGCGATG	construction of psgRNA-ompF40	This study
ompF_psgRNA_N20-40	CATCGCCGCAGCGGTTTCAGGCGAAAGACGTAGAAGGTATGTTTTAGAGCTAGAAATAGC	construction of psgRNA-ompF40	This study
ompF_psgRNA_N20_com-41	GCTATTTCTAGCTCTAAAACCTTCAAAGTAGTTCACCAGACTGAAACCGCTGCGGCGATG	construction of psgRNA-ompF41	This study
ompF_psgRNA_N20-41	CATCGCCGCAGCGGTTTCAGTCTGGTGAACTACTTTGAAGGTTTTAGAGCTAGAAATAGC	construction of psgRNA-ompF41	This study
ompF_psgRNA_N20_com-42	GCTATTTCTAGCTCTAAAACCCTATGTTGACTACATCATCCTGAAACCGCTGCGGCGATG	construction of psgRNA-ompF42	This study
ompF_psgRNA_N20-42	CATCGCCGCAGCGGTTTCAGGATGATGTAGTCAACATAGGGTTTTAGAGCTAGAAATAGC	construction of psgRNA-ompF42	This study
ompF_psgRNA_N20_com-43	GCTATTTCTAGCTCTAAAACATGTTGACTACATCATCAACCTGAAACCGCTGCGGCGATG	construction of psgRNA-ompF43	This study
ompF_psgRNA_N20-43	CATCGCCGCAGCGGTTTCAGGTTGATGATGTAGTCAACATGTTTTAGAGCTAGAAATAGC	construction of psgRNA-ompF43	This study
ompF_psgRNA_N20_com-44	GCTATTTCTAGCTCTAAAACTCATGGTTTTTTTTATGACACTGAAACCGCTGCGGCGATG	construction of psgRNA-ompF44	This study
ompF_psgRNA_N20-44	CATCGCCGCAGCGGTTTCAGTGTCATAAAAAAAACCATGAGTTTTAGAGCTAGAAATAGC	construction of psgRNA-ompF44	This study
ompF_psgRNA_N20_com-45	GCTATTTCTAGCTCTAAAACTGAGGGTAATAAATAATGATCTGAAACCGCTGCGGCGATG	construction of psgRNA-ompF45	This study
ompF_psgRNA_N20-45	CATCGCCGCAGCGGTTTCAGATCATTATTTATTACCCTCAGTTTTAGAGCTAGAAATAGC	construction of psgRNA-ompF45	This study
ompF_psgRNA_N20_com-46	GCTATTTCTAGCTCTAAAACGAATATTGCGCTTCATCATTCTGAAACCGCTGCGGCGATG	construction of psgRNA-ompF46	This study
ompF_psgRNA_N20-46	CATCGCCGCAGCGGTTTCAGAATGATGAAGCGCAATATTCGTTTTAGAGCTAGAAATAGC	construction of psgRNA-ompF46	This study
ompF_psgRNA_N20_com-47	GCTATTTCTAGCTCTAAAACGCTACTAACAGAGCAGGGACCTGAAACCGCTGCGGCGATG	construction of psgRNA-ompF47	This study
ompF_psgRNA_N20-47	CATCGCCGCAGCGGTTTCAGGTCCCTGCTCTGTTAGTAGCGTTTTAGAGCTAGAAATAGC	construction of psgRNA-ompF47	This study
ompF_psgRNA_N20_com-48	GCTATTTCTAGCTCTAAAACACAGCAACGGTGTCGTCTGACTGAAACCGCTGCGGCGATG	construction of psgRNA-ompF48	This study
ompF_psgRNA_N20-48	CATCGCCGCAGCGGTTTCAGTCAGACGACACCGTTGCTGTGTTTTAGAGCTAGAAATAGC	construction of psgRNA-ompF48	This study
ompF_psgRNA_N20_com-49	GCTATTTCTAGCTCTAAAACTTGCTGTGGGTATCGTTTACCTGAAACCGCTGCGGCGATG	construction of psgRNA-ompF49	This study
ompF_psgRNA_N20-49	CATCGCCGCAGCGGTTTCAGGTAAACGATACCCACAGCAAGTTTTAGAGCTAGAAATAGC	construction of psgRNA-ompF49	This study
ompF_psgRNA_N20_com-05	GCTATTTCTAGCTCTAAAACAGACGGGCATAGGTCATGTCCTGAAACCGCTGCGGCGATG	construction of psgRNA-ompF5	This study
ompF_psgRNA_N20-05	CATCGCCGCAGCGGTTTCAGGACATGACCTATGCCCGTCTGTTTTAGAGCTAGAAATAGC	construction of psgRNA-ompF5	This study
ompF_psgRNA_N20_com-06	GCTATTTCTAGCTCTAAAACTTTAAAACCAAGACGGGCATCTGAAACCGCTGCGGCGATG	construction of psgRNA-ompF6	This study
ompF_psgRNA_N20-06	CATCGCCGCAGCGGTTTCAGATGCCCGTCTTGGTTTTAAAGTTTTAGAGCTAGAAATAGC	construction of psgRNA-ompF6	This study
ompF_psgRNA_N20_com-07	GCTATTTCTAGCTCTAAAACGTCAGATCGGAATTGATTTGCTGAAACCGCTGCGGCGATG	construction of psgRNA-ompF7	This study
ompF_psgRNA_N20-07	CATCGCCGCAGCGGTTTCAGCAAATCAATTCCGATCTGACGTTTTAGAGCTAGAAATAGC	construction of psgRNA-ompF7	This study
ompF_psgRNA_N20_com-08	GCTATTTCTAGCTCTAAAACATCTGACCGGTTATGGTCAGCTGAAACCGCTGCGGCGATG	construction of psgRNA-ompF8	This study
ompF_psgRNA_N20-08	CATCGCCGCAGCGGTTTCAGCTGACCATAACCGGTCAGATGTTTTAGAGCTAGAAATAGC	construction of psgRNA-ompF8	This study
ompF_psgRNA_N20_com-09	GCTATTTCTAGCTCTAAAACGGAAGTTATATTCCCACTGACTGAAACCGCTGCGGCGATG	construction of psgRNA-ompF9	This study
ompF_psgRNA_N20-09	CATCGCCGCAGCGGTTTCAGTCAGTGGGAATATAACTTCCGTTTTAGAGCTAGAAATAGC	construction of psgRNA-ompF9	This study
ompR_sgRNA_com-1	TTCTAGCTCTAAAACTGTTCGGTGAGATAACGTTCCTGAAACCGCTGCGG	construction of psgRNA-ompR1-31	This study
ompR_sgRNA_N20-1	CCGCAGCGGTTTCAGGAACGTTATCTCACCGAACAGTTTTAGAGCTAGAA	construction of psgRNA-ompR1-31	This study
ompR_sgRNA_com-2	TTCTAGCTCTAAAACAACAAGGCTTCCAGGTTCGACTGAAACCGCTGCGG	construction of psgRNA-ompR2-102	This study
ompR_sgRNA_N20-2	CCGCAGCGGTTTCAGTCGAACCTGGAAGCCTTGTTGTTTTAGAGCTAGAA	construction of psgRNA-ompR2-102	This study
ompR_sgRNA_com-3	TTCTAGCTCTAAAACTCTGTTCTGCATTAGCGACGCTGAAACCGCTGCGG	construction of psgRNA-ompR3-10	This study
ompR_sgRNA_N20-3	CCGCAGCGGTTTCAGCGTCGCTAATGCAGAACAGAGTTTTAGAGCTAGAA	construction of psgRNA-ompR3-10	This study
ompR_sgRNA_com-4	TTCTAGCTCTAAAACGCAGCGCACGCAGGCGCATGCTGAAACCGCTGCGG	construction of psgRNA-ompR4-18	This study
ompR_sgRNA_N20-4	CCGCAGCGGTTTCAGCATGCGCCTGCGTGCGCTGCGTTTTAGAGCTAGAA	construction of psgRNA-ompR4-18	This study
ompR_sgRNA_com-5	TTCTAGCTCTAAAACGCGTGCGCTGCTGGAACGTTCTGAAACCGCTGCGG	construction of psgRNA-ompR5-22	Miyake et al, 2020 (as the ompR_sgRNA_com)
ompR_sgRNA_N20-5	CCGCAGCGGTTTCAGAACGTTCCAGCAGCGCACGCGTTTTAGAGCTAGAA	construction of psgRNA-ompR5-22	Miyake et al, 2020 (as the ompR_sgRNA_N20)
ompR_sgRNA_com-6	TTCTAGCTCTAAAACGGAAGCCTTGTTCGGTGAGACTGAAACCGCTGCGG	construction of psgRNA-ompR6-23	This study
ompR_sgRNA_N20-6	CCGCAGCGGTTTCAGTCTCACCGAACAAGGCTTCCGTTTTAGAGCTAGAA	construction of psgRNA-ompR6-23	This study
pfkA_psgRNA_N20_com-04	GCTATTTCTAGCTCTAAAACCTTGTCAACACACCGATTTTCTGAAACCGCTGCGGCGATG	construction of psgRNA-pfkA4	This study
pfkA_psgRNA_N20-04	CATCGCCGCAGCGGTTTCAGAAAATCGGTGTGTTGACAAGGTTTTAGAGCTAGAAATAGC	construction of psgRNA-pfkA4	This study
pfkA_psgRNA_N20_com-05	GCTATTTCTAGCTCTAAAACCCGCTTGTCAACACACCGATCTGAAACCGCTGCGGCGATG	construction of psgRNA-pfkA5	This study
pfkA_psgRNA_N20-05	CATCGCCGCAGCGGTTTCAGATCGGTGTGTTGACAAGCGGGTTTTAGAGCTAGAAATAGC	construction of psgRNA-pfkA5	This study
pfkA_psgRNA_N20_com-06	GCTATTTCTAGCTCTAAAACGGCGCATCACCGCCGCTTGTCTGAAACCGCTGCGGCGATG	construction of psgRNA-pfkA6	This study
pfkA_psgRNA_N20-06	CATCGCCGCAGCGGTTTCAGACAAGCGGCGGTGATGCGCCGTTTTAGAGCTAGAAATAGC	construction of psgRNA-pfkA6	This study
pgi_psgRNA_N20_com-04	GCTATTTCTAGCTCTAAAACGGCAGCGGTCTGCGTTGGATCTGAAACCGCTGCGGCGATG	construction of psgRNA-pgi4	This study
pgi_psgRNA_N20-04	CATCGCCGCAGCGGTTTCAGATCCAACGCAGACCGCTGCCGTTTTAGAGCTAGAAATAGC	construction of psgRNA-pgi4	This study
pgi_psgRNA_N20_com-05	GCTATTTCTAGCTCTAAAACACGCAGACCGCTGCCTGGCACTGAAACCGCTGCGGCGATG	construction of psgRNA-pgi5	This study
pgi_psgRNA_N20-05	CATCGCCGCAGCGGTTTCAGTGCCAGGCAGCGGTCTGCGTGTTTTAGAGCTAGAAATAGC	construction of psgRNA-pgi5	This study
pgi_psgRNA_N20_com-06	GCTATTTCTAGCTCTAAAACTCTTTAGCAAAAAGATCGGCCTGAAACCGCTGCGGCGATG	construction of psgRNA-pgi6-2	This study
pgi_psgRNA_N20-06	CATCGCCGCAGCGGTTTCAGGCCGATCTTTTTGCTAAAGAGTTTTAGAGCTAGAAATAGC	construction of psgRNA-pgi6-2	This study
phoB_sgRNA_com-1	TTCTAGCTCTAAAACGCTGAAAGCCATTTTGTTCGCTGAAACCGCTGCGG	construction of psgRNA-phoB1-17	Miyake et al, 2020 (as the phoB_sgRNA_com)
phoB_sgRNA_N20-1	CCGCAGCGGTTTCAGCGAACAAAATGGCTTTCAGCGTTTTAGAGCTAGAA	construction of psgRNA-phoB1-17	Miyake et al, 2020 (as the phoB_sgRNA_N20)
phoB_sgRNA_com-2	TTCTAGCTCTAAAACCTTCGACCGGCTGAAAGCCACTGAAACCGCTGCGG	construction of psgRNA-phoB2-3	This study
phoB_sgRNA_N20-2	CCGCAGCGGTTTCAGTGGCTTTCAGCCGGTCGAAGGTTTTAGAGCTAGAA	construction of psgRNA-phoB2-3	This study
phoB_sgRNA_com-3	TTCTAGCTCTAAAACGGGTTCATTCAGTTGATTCACTGAAACCGCTGCGG	construction of psgRNA-phoB3-11	This study
phoB_sgRNA_N20-3	CCGCAGCGGTTTCAGTGAATCAACTGAATGAACCCGTTTTAGAGCTAGAA	construction of psgRNA-phoB3-11	This study
phoB_sgRNA_com-4	TTCTAGCTCTAAAACGCCAGGGTTCATTCAGTTGACTGAAACCGCTGCGG	construction of psgRNA-phoB4-6	This study
phoB_sgRNA_N20-4	CCGCAGCGGTTTCAGTCAACTGAATGAACCCTGGCGTTTTAGAGCTAGAA	construction of psgRNA-phoB4-6	This study
phoB_sgRNA_com-5	TTCTAGCTCTAAAACTGGCCGGATTTAATTCTCCTCTGAAACCGCTGCGG	construction of psgRNA-phoB5-1	This study
phoB_sgRNA_N20-5	CCGCAGCGGTTTCAGAGGAGAATTAAATCCGGCCAGTTTTAGAGCTAGAA	construction of psgRNA-phoB5-1	This study
phoB_psgRNA_N20_com-06	GCTATTTCTAGCTCTAAAACGGCCGGATTTAATTCTCCTCCTGAAACCGCTGCGGCGATG	construction of psgRNA-phoB6	This study
phoB_psgRNA_N20-06	CATCGCCGCAGCGGTTTCAGGAGGAGAATTAAATCCGGCCGTTTTAGAGCTAGAAATAGC	construction of psgRNA-phoB6	This study
phoB_psgRNA_N20_com-07	GCTATTTCTAGCTCTAAAACGATTTAATTCTCCTCGACTGCTGAAACCGCTGCGGCGATG	construction of psgRNA-phoB7	This study
phoB_psgRNA_N20-07	CATCGCCGCAGCGGTTTCAGCAGTCGAGGAGAATTAAATCGTTTTAGAGCTAGAAATAGC	construction of psgRNA-phoB7	This study
phoB_psgRNA_N20_com-08	GCTATTTCTAGCTCTAAAACGTCGAGGAGAATTAAATCCGCTGAAACCGCTGCGGCGATG	construction of psgRNA-phoB8	This study
phoB_psgRNA_N20-08	CATCGCCGCAGCGGTTTCAGCGGATTTAATTCTCCTCGACGTTTTAGAGCTAGAAATAGC	construction of psgRNA-phoB8	This study
phoB_psgRNA_N20_com-09	GCTATTTCTAGCTCTAAAACGGTAACATCCAGTCGAGGAGCTGAAACCGCTGCGGCGATG	construction of psgRNA-phoB9	This study
phoB_psgRNA_N20-09	CATCGCCGCAGCGGTTTCAGCTCCTCGACTGGATGTTACCGTTTTAGAGCTAGAAATAGC	construction of psgRNA-phoB9	This study
phoBR_sgRNA_com	TTCTAGCTCTAAAACCACGGTGCCGAATTTAGCGTCTGAAACCGCTGCGG	construction of psgRNA-phoBR1-59	This study
phoBR_sgRNA_N20	CCGCAGCGGTTTCAGACGCTAAATTCGGCACCGTGGTTTTAGAGCTAGAA	construction of psgRNA-phoBR1-59	This study
phoBR_sgRNA_com-2	TTCTAGCTCTAAAACCCGGTTTGCCGGGAACGCGCCTGAAACCGCTGCGG	construction of psgRNA-phoBR2-5	This study
phoBR_sgRNA_N20-2	CCGCAGCGGTTTCAGGCGCGTTCCCGGCAAACCGGGTTTTAGAGCTAGAA	construction of psgRNA-phoBR2-5	This study
phoBR_sgRNA_com-3	TTCTAGCTCTAAAACACTGTACTCTCAATATTCAGCTGAAACCGCTGCGG	construction of psgRNA-phoBR3-60	This study
phoBR_sgRNA_N20-3	CCGCAGCGGTTTCAGCTGAATATTGAGAGTACAGTGTTTTAGAGCTAGAA	construction of psgRNA-phoBR3-60	This study
phoBR_sgRNA_com-4	TTCTAGCTCTAAAACGCGCGGATGACTATATCACCCTGAAACCGCTGCGG	construction of psgRNA-phoBR4-3	This study
phoBR_sgRNA_N20-4	CCGCAGCGGTTTCAGGGTGATATAGTCATCCGCGCGTTTTAGAGCTAGAA	construction of psgRNA-phoBR4-3	This study
phoBR_sgRNA_com-5	TTCTAGCTCTAAAACGGCAAACCGGCGGTAGCGGACTGAAACCGCTGCGG	construction of psgRNA-phoBR5-2	This study
phoBR_sgRNA_N20-5	CCGCAGCGGTTTCAGTCCGCTACCGCCGGTTTGCCGTTTTAGAGCTAGAA	construction of psgRNA-phoBR5-2	This study
phoBR_sgRNA_com-6	TTCTAGCTCTAAAACGATAAGCAGTCCTGTTACCGCTGAAACCGCTGCGG	construction of psgRNA-phoBR6-10	This study
phoBR_sgRNA_N20-6	CCGCAGCGGTTTCAGCGGTAACAGGACTGCTTATCGTTTTAGAGCTAGAA	construction of psgRNA-phoBR6-10	This study
phoBR_sgRNA_com-7	TTCTAGCTCTAAAACGTCCGTTATCTTCAACGCTACTGAAACCGCTGCGG	construction of psgRNA-phoBR7-3	This study
phoBR_sgRNA_N20-7	CCGCAGCGGTTTCAGTAGCGTTGAAGATAACGGACGTTTTAGAGCTAGAA	construction of psgRNA-phoBR7-3	This study
phoP_sgRNA_com-1	TTCTAGCTCTAAAACAGATCGACAATCGCAATATCCTGAAACCGCTGCGG	construction of psgRNA-phoP1-23	Miyake et al, 2020 (as the phoP_sgRNA_com)
phoP_sgRNA_N20-1	CCGCAGCGGTTTCAGGATATTGCGATTGTCGATCTGTTTTAGAGCTAGAA	construction of psgRNA-phoP1-23	Miyake et al, 2020 (as the phoP_sgRNA_N20)
phoP_sgRNA_com-2	TTCTAGCTCTAAAACGAATCGGCAGTGAAACATCGCTGAAACCGCTGCGG	construction of psgRNA-phoP2-2	This study
phoP_sgRNA_N20-2	CCGCAGCGGTTTCAGCGATGTTTCACTGCCGATTCGTTTTAGAGCTAGAA	construction of psgRNA-phoP2-2	This study
phoP_sgRNA_com-3	TTCTAGCTCTAAAACATTCTGGTATTAACCGCCCGCTGAAACCGCTGCGG	construction of psgRNA-phoP3-17	This study
phoP_sgRNA_N20-3	CCGCAGCGGTTTCAGCGGGCGGTTAATACCAGAATGTTTTAGAGCTAGAA	construction of psgRNA-phoP3-17	This study
phoP_sgRNA_com-4	TTCTAGCTCTAAAACGCTTTCACGGGCGGTTAATACTGAAACCGCTGCGG	construction of psgRNA-phoP4-2	This study
phoP_sgRNA_N20-4	CCGCAGCGGTTTCAGTATTAACCGCCCGTGAAAGCGTTTTAGAGCTAGAA	construction of psgRNA-phoP4-2	This study
phoP_sgRNA_com-5	TTCTAGCTCTAAAACGCCAGCTTTCACGGGCGGTTCTGAAACCGCTGCGG	construction of psgRNA-phoP5-1	This study
phoP_sgRNA_N20-5	CCGCAGCGGTTTCAGAACCGCCCGTGAAAGCTGGCGTTTTAGAGCTAGAA	construction of psgRNA-phoP5-1	This study
phoQ_sgRNA_com-1	TTCTAGCTCTAAAACTAGGCAAGCGAAAGCACCAGCTGAAACCGCTGCGG	construction of psgRNA-phoQ1-50	This study
phoQ_sgRNA_N20-1	CCGCAGCGGTTTCAGCTGGTGCTTTCGCTTGCCTAGTTTTAGAGCTAGAA	construction of psgRNA-phoQ1-50	This study
phoQ_sgRNA_com-2	TTCTAGCTCTAAAACAAACGTAGTTTTATCGAAACCTGAAACCGCTGCGG	construction of psgRNA-phoQ2-81	Miyake et al, 2020 (as the phoQ_sgRNA_com)
phoQ_sgRNA_N20-2	CCGCAGCGGTTTCAGGTTTCGATAAAACTACGTTTGTTTTAGAGCTAGAA	construction of psgRNA-phoQ2-81	Miyake et al, 2020 (as the phoQ_sgRNA_N20)
phoQ_sgRNA_com-3	TTCTAGCTCTAAAACCGTAACAGCCGAAACGTAGTCTGAAACCGCTGCGG	construction of psgRNA-phoQ3-72	This study
phoQ_sgRNA_N20-3	CCGCAGCGGTTTCAGACTACGTTTCGGCTGTTACGGTTTTAGAGCTAGAA	construction of psgRNA-phoQ3-72	This study
phoR_sgRNA_com-1	TTCTAGCTCTAAAACGGAGGCAGCAAAGTAGCAGCCTGAAACCGCTGCGG	construction of psgRNA-phoR1-14	This study
phoR_sgRNA_N20-1	CCGCAGCGGTTTCAGGCTGCTACTTTGCTGCCTCCGTTTTAGAGCTAGAA	construction of psgRNA-phoR1-14	This study
phoR_sgRNA_com-2	TTCTAGCTCTAAAACCCCGGCTTTCATCCTGGGTGCTGAAACCGCTGCGG	construction of psgRNA-phoR2-4	Miyake et al, 2020 (as the phoR_sgRNA_com)
phoR_sgRNA_N20-2	CCGCAGCGGTTTCAGCACCCAGGATGAAAGCCGGGGTTTTAGAGCTAGAA	construction of psgRNA-phoR2-4	Miyake et al, 2020 (as the phoR_sgRNA_N20)
phoR_sgRNA_com-3	TTCTAGCTCTAAAACGGGTGCATTTTTTGGTTACCCTGAAACCGCTGCGG	construction of psgRNA-phoR3-1	This study
phoR_sgRNA_N20-3	CCGCAGCGGTTTCAGGGTAACCAAAAAATGCACCCGTTTTAGAGCTAGAA	construction of psgRNA-phoR3-1	This study
pldA_psgRNA_N20_com-01	GCTATTTCTAGCTCTAAAACGCAACAACCAGCCCTGCAGACTGAAACCGCTGCGGCGATG	construction of psgRNA-pldA1-1	This study
pldA_psgRNA_N20-01	CATCGCCGCAGCGGTTTCAGTCTGCAGGGCTGGTTGTTGCGTTTTAGAGCTAGAAATAGC	construction of psgRNA-pldA1-1	This study
pldA_psgRNA_N20_com-02	GCTATTTCTAGCTCTAAAACGTGTTTATGTTGCCTATGGCCTGAAACCGCTGCGGCGATG	construction of psgRNA-pldA2-1	This study
pldA_psgRNA_N20-02	CATCGCCGCAGCGGTTTCAGGCCATAGGCAACATAAACACGTTTTAGAGCTAGAAATAGC	construction of psgRNA-pldA2-1	This study
pldA_psgRNA_N20_com-03	GCTATTTCTAGCTCTAAAACCTTGTGCATATACTGCCATACTGAAACCGCTGCGGCGATG	construction of psgRNA-pldA3-1	This study
pldA_psgRNA_N20-03	CATCGCCGCAGCGGTTTCAGTATGGCAGTATATGCACAAGGTTTTAGAGCTAGAAATAGC	construction of psgRNA-pldA3-1	This study
pldA_psgRNA_N20_com-04	GCTATTTCTAGCTCTAAAACTTGCCTCTTGTGCATATACTCTGAAACCGCTGCGGCGATG	construction of psgRNA-pldA4-1	This study
pldA_psgRNA_N20-04	CATCGCCGCAGCGGTTTCAGAGTATATGCACAAGAGGCAAGTTTTAGAGCTAGAAATAGC	construction of psgRNA-pldA4-1	This study
plsBp_psgRNA_N20_com-01	GCTATTTCTAGCTCTAAAACTTGAAAGAACCTTTTTACATCTGAAACCGCTGCGGCGATG	construction of psgRNA-plsBp1	This study
plsBp_psgRNA_N20-01	CATCGCCGCAGCGGTTTCAGATGTAAAAAGGTTCTTTCAAGTTTTAGAGCTAGAAATAGC	construction of psgRNA-plsBp1	This study
plsBp_psgRNA_N20_com-02	GCTATTTCTAGCTCTAAAACTTTTACATTATGAGCGTCAACTGAAACCGCTGCGGCGATG	construction of psgRNA-plsBp2	This study
plsBp_psgRNA_N20-02	CATCGCCGCAGCGGTTTCAGTTGACGCTCATAATGTAAAAGTTTTAGAGCTAGAAATAGC	construction of psgRNA-plsBp2	This study
plsBp_psgRNA_N20_com-03	GCTATTTCTAGCTCTAAAACAATCATCGGATTTAACGGTACTGAAACCGCTGCGGCGATG	construction of psgRNA-plsBp3	This study
plsBp_psgRNA_N20-03	CATCGCCGCAGCGGTTTCAGTACCGTTAAATCCGATGATTGTTTTAGAGCTAGAAATAGC	construction of psgRNA-plsBp3	This study
plsBp_psgRNA_N20_com-04	GCTATTTCTAGCTCTAAAACATAATACCACTGGATTCACCCTGAAACCGCTGCGGCGATG	construction of psgRNA-plsBp4	This study
plsBp_psgRNA_N20-04	CATCGCCGCAGCGGTTTCAGGGTGAATCCAGTGGTATTATGTTTTAGAGCTAGAAATAGC	construction of psgRNA-plsBp4	This study
plsBp_psgRNA_N20_com-05	GCTATTTCTAGCTCTAAAACGTGGTATTATTGGCCATTGACTGAAACCGCTGCGGCGATG	construction of psgRNA-plsBp5	This study
plsBp_psgRNA_N20-05	CATCGCCGCAGCGGTTTCAGTCAATGGCCAATAATACCACGTTTTAGAGCTAGAAATAGC	construction of psgRNA-plsBp5	This study
plsBp_psgRNA_N20_com-06	GCTATTTCTAGCTCTAAAACGAATCATCGGATTTAACGGTCTGAAACCGCTGCGGCGATG	construction of psgRNA-plsBp6	This study
plsBp_psgRNA_N20-06	CATCGCCGCAGCGGTTTCAGACCGTTAAATCCGATGATTCGTTTTAGAGCTAGAAATAGC	construction of psgRNA-plsBp6	This study
proP_psgRNA_N20_com-01	GCTATTTCTAGCTCTAAAACATTACCCTTCGTGATGTCACCTGAAACCGCTGCGGCGATG	construction of psgRNA-proP1	This study
proP_psgRNA_N20-01	CATCGCCGCAGCGGTTTCAGGTGACATCACGAAGGGTAATGTTTTAGAGCTAGAAATAGC	construction of psgRNA-proP1	This study
proP_psgRNA_N20_com-02	GCTATTTCTAGCTCTAAAACTTCGTGATGTCACCATTATTCTGAAACCGCTGCGGCGATG	construction of psgRNA-proP2	This study
proP_psgRNA_N20-02	CATCGCCGCAGCGGTTTCAGAATAATGGTGACATCACGAAGTTTTAGAGCTAGAAATAGC	construction of psgRNA-proP2	This study
proP_psgRNA_N20_com-03	GCTATTTCTAGCTCTAAAACTCGTGATGTCACCATTATTGCTGAAACCGCTGCGGCGATG	construction of psgRNA-proP3	This study
proP_psgRNA_N20-03	CATCGCCGCAGCGGTTTCAGCAATAATGGTGACATCACGAGTTTTAGAGCTAGAAATAGC	construction of psgRNA-proP3	This study
punC_psgRNA_N20_com-01	GCTATTTCTAGCTCTAAAACAGTACGCTCAAACCCGCCAGCTGAAACCGCTGCGGCGATG	construction of psgRNA-punC1	This study
punC_psgRNA_N20-01	CATCGCCGCAGCGGTTTCAGCTGGCGGGTTTGAGCGTACTGTTTTAGAGCTAGAAATAGC	construction of psgRNA-punC1	This study
punC_psgRNA_N20_com-02	GCTATTTCTAGCTCTAAAACATATGTATCTGCCTGCTTTCCTGAAACCGCTGCGGCGATG	construction of psgRNA-punC2	This study
punC_psgRNA_N20-02	CATCGCCGCAGCGGTTTCAGGAAAGCAGGCAGATACATATGTTTTAGAGCTAGAAATAGC	construction of psgRNA-punC2	This study
punC_psgRNA_N20_com-03	GCTATTTCTAGCTCTAAAACGCTTTCGCCGCCATACAGGCCTGAAACCGCTGCGGCGATG	construction of psgRNA-punC3	This study
punC_psgRNA_N20-03	CATCGCCGCAGCGGTTTCAGGCCTGTATGGCGGCGAAAGCGTTTTAGAGCTAGAAATAGC	construction of psgRNA-punC3	This study
purB_psgRNA_N20_com-01	GCTATTTCTAGCTCTAAAACCACTGACCGCCGTTTCCCCTCTGAAACCGCTGCGGCGATG	construction of psgRNA-purB1	This study
purB_psgRNA_N20-01	CATCGCCGCAGCGGTTTCAGAGGGGAAACGGCGGTCAGTGGTTTTAGAGCTAGAAATAGC	construction of psgRNA-purB1	This study
purB_psgRNA_N20_com-02	GCTATTTCTAGCTCTAAAACTCGACAGGGGAAACGGCGGTCTGAAACCGCTGCGGCGATG	construction of psgRNA-purB2	This study
purB_psgRNA_N20-02	CATCGCCGCAGCGGTTTCAGACCGCCGTTTCCCCTGTCGAGTTTTAGAGCTAGAAATAGC	construction of psgRNA-purB2	This study
purB_psgRNA_N20_com-03	GCTATTTCTAGCTCTAAAACCCGTTTCCCCTGTCGATGGACTGAAACCGCTGCGGCGATG	construction of psgRNA-purB3	This study
purB_psgRNA_N20-03	CATCGCCGCAGCGGTTTCAGTCCATCGACAGGGGAAACGGGTTTTAGAGCTAGAAATAGC	construction of psgRNA-purB3	This study
purB_psgRNA_N20_com-04	GCTATTTCTAGCTCTAAAACTTTCCCCTGTCGATGGACGCCTGAAACCGCTGCGGCGATG	construction of psgRNA-purB4	This study
purB_psgRNA_N20-04	CATCGCCGCAGCGGTTTCAGGCGTCCATCGACAGGGGAAAGTTTTAGAGCTAGAAATAGC	construction of psgRNA-purB4	This study
purB_psgRNA_N20_com-06	GCTATTTCTAGCTCTAAAACCTGTCGATGGACGCTACGGCCTGAAACCGCTGCGGCGATG	construction of psgRNA-purB6	This study
purB_psgRNA_N20-06	CATCGCCGCAGCGGTTTCAGGCCGTAGCGTCCATCGACAGGTTTTAGAGCTAGAAATAGC	construction of psgRNA-purB6	This study
purB_psgRNA_N20-07	CATCGCCGCAGCGGTTTCAGCGCCGTAGCGTCCATCGACAGTTTTAGAGCTAGAAATAGC	construction of psgRNA-purB7	This study
purB_psgRNA_N20_com-07	GCTATTTCTAGCTCTAAAACTGTCGATGGACGCTACGGCGCTGAAACCGCTGCGGCGATG	construction of psgRNA-purB7	This study
purB_psgRNA_N20-08	CATCGCCGCAGCGGTTTCAGTCGCCGTAGCGTCCATCGACGTTTTAGAGCTAGAAATAGC	construction of psgRNA-purB8	This study
purB_psgRNA_N20_com-08	GCTATTTCTAGCTCTAAAACGTCGATGGACGCTACGGCGACTGAAACCGCTGCGGCGATG	construction of psgRNA-purB8	This study
purB_psgRNA_N20-09	CATCGCCGCAGCGGTTTCAGGATAAAGTCAGCGCGCTGCGGTTTTAGAGCTAGAAATAGC	construction of psgRNA-purB9	This study
purB_psgRNA_N20_com-09	GCTATTTCTAGCTCTAAAACCGCAGCGCGCTGACTTTATCCTGAAACCGCTGCGGCGATG	construction of psgRNA-purB9	This study
purH_psgRNA_N20_com-01	GCTATTTCTAGCTCTAAAACTGCAACAACGTCGTCCAGTCCTGAAACCGCTGCGGCGATG	construction of psgRNA-purH1	This study
purH_psgRNA_N20-01	CATCGCCGCAGCGGTTTCAGGACTGGACGACGTTGTTGCAGTTTTAGAGCTAGAAATAGC	construction of psgRNA-purH1	This study
purH_psgRNA_N20_com-02	GCTATTTCTAGCTCTAAAACGTCCGCCGCGCTCTGCTCAGCTGAAACCGCTGCGGCGATG	construction of psgRNA-purH2	This study
purH_psgRNA_N20-02	CATCGCCGCAGCGGTTTCAGCTGAGCAGAGCGCGGCGGACGTTTTAGAGCTAGAAATAGC	construction of psgRNA-purH2	This study
purH_psgRNA_N20_com-03	GCTATTTCTAGCTCTAAAACCCGCGCTCTGCTCAGTGTTTCTGAAACCGCTGCGGCGATG	construction of psgRNA-purH3	This study
purH_psgRNA_N20-03	CATCGCCGCAGCGGTTTCAGAAACACTGAGCAGAGCGCGGGTTTTAGAGCTAGAAATAGC	construction of psgRNA-purH3	This study
purH_psgRNA_N20_com-04	GCTATTTCTAGCTCTAAAACCGCTCTGCTCAGTGTTTCTGCTGAAACCGCTGCGGCGATG	construction of psgRNA-purH4	This study
purH_psgRNA_N20-04	CATCGCCGCAGCGGTTTCAGCAGAAACACTGAGCAGAGCGGTTTTAGAGCTAGAAATAGC	construction of psgRNA-purH4	This study
purH_psgRNA_N20_com-05	GCTATTTCTAGCTCTAAAACGCTTTGTCAGAAACACTGAGCTGAAACCGCTGCGGCGATG	construction of psgRNA-purH5	This study
purH_psgRNA_N20-05	CATCGCCGCAGCGGTTTCAGCTCAGTGTTTCTGACAAAGCGTTTTAGAGCTAGAAATAGC	construction of psgRNA-purH5	This study
purH_psgRNA_N20_com-06	GCTATTTCTAGCTCTAAAACGTATCGTCGAATTCGCCCAGCTGAAACCGCTGCGGCGATG	construction of psgRNA-purH6	This study
purH_psgRNA_N20-06	CATCGCCGCAGCGGTTTCAGCTGGGCGAATTCGACGATACGTTTTAGAGCTAGAAATAGC	construction of psgRNA-purH6	This study
putP_psgRNA_N20_com-01	GCTATTTCTAGCTCTAAAACACATCGGTGTGCTAATAGCCCTGAAACCGCTGCGGCGATG	construction of psgRNA-putP1-1	This study
putP_psgRNA_N20-01	CATCGCCGCAGCGGTTTCAGGGCTATTAGCACACCGATGTGTTTTAGAGCTAGAAATAGC	construction of psgRNA-putP1-1	This study
putP_psgRNA_N20_com-02	GCTATTTCTAGCTCTAAAACATGTTGGTGACATTTTGTGTCTGAAACCGCTGCGGCGATG	construction of psgRNA-putP2	This study
putP_psgRNA_N20-02	CATCGCCGCAGCGGTTTCAGACACAAAATGTCACCAACATGTTTTAGAGCTAGAAATAGC	construction of psgRNA-putP2	This study
putP_psgRNA_N20_com-03	GCTATTTCTAGCTCTAAAACAAGATATAGACACAAAATGTCTGAAACCGCTGCGGCGATG	construction of psgRNA-putP3	This study
putP_psgRNA_N20-03	CATCGCCGCAGCGGTTTCAGACATTTTGTGTCTATATCTTGTTTTAGAGCTAGAAATAGC	construction of psgRNA-putP3	This study
pykF_psgRNA_N20_com-04	GCTATTTCTAGCTCTAAAACATGGTGCAAACAATTTTGGTCTGAAACCGCTGCGGCGATG	construction of psgRNA-pykF4	This study
pykF_psgRNA_N20-04	CATCGCCGCAGCGGTTTCAGACCAAAATTGTTTGCACCATGTTTTAGAGCTAGAAATAGC	construction of psgRNA-pykF4	This study
pykF_psgRNA_N20_com-05	GCTATTTCTAGCTCTAAAACAAATTGTTTGCACCATCGGACTGAAACCGCTGCGGCGATG	construction of psgRNA-pykF5	This study
pykF_psgRNA_N20-05	CATCGCCGCAGCGGTTTCAGTCCGATGGTGCAAACAATTTGTTTTAGAGCTAGAAATAGC	construction of psgRNA-pykF5	This study
pykF_psgRNA_N20_com-06	GCTATTTCTAGCTCTAAAACTCGGACCGAAAACCGAATCTCTGAAACCGCTGCGGCGATG	construction of psgRNA-pykF6	This study
pykF_psgRNA_N20-06	CATCGCCGCAGCGGTTTCAGAGATTCGGTTTTCGGTCCGAGTTTTAGAGCTAGAAATAGC	construction of psgRNA-pykF6	This study
pyrF_psgRNA_N20_com-01	GCTATTTCTAGCTCTAAAACCGCTGTTACGAATTCTCCTGCTGAAACCGCTGCGGCGATG	construction of psgRNA-pyrF1	This study
pyrF_psgRNA_N20-01	CATCGCCGCAGCGGTTTCAGCAGGAGAATTCGTAACAGCGGTTTTAGAGCTAGAAATAGC	construction of psgRNA-pyrF1	This study
pyrF_psgRNA_N20_com-02	GCTATTTCTAGCTCTAAAACGCGCGTCATCACGATTATGACTGAAACCGCTGCGGCGATG	construction of psgRNA-pyrF2	This study
pyrF_psgRNA_N20-02	CATCGCCGCAGCGGTTTCAGTCATAATCGTGATGACGCGCGTTTTAGAGCTAGAAATAGC	construction of psgRNA-pyrF2	This study
pyrF_psgRNA_N20_com-03	GCTATTTCTAGCTCTAAAACTTGTCGACAAGATCGACCCACTGAAACCGCTGCGGCGATG	construction of psgRNA-pyrF3	This study
pyrF_psgRNA_N20-03	CATCGCCGCAGCGGTTTCAGTGGGTCGATCTTGTCGACAAGTTTTAGAGCTAGAAATAGC	construction of psgRNA-pyrF3	This study
qseB_sgRNA_com-1	TTCTAGCTCTAAAACTGTGTAAACCAGTCGACGCTCTGAAACCGCTGCGG	construction of psgRNA-qseB1-21	Miyake et al, 2020 (as the qseB_sgRNA_com)
qseB_sgRNA_N20-1	CCGCAGCGGTTTCAGAGCGTCGACTGGTTTACACAGTTTTAGAGCTAGAA	construction of psgRNA-qseB1-21	Miyake et al, 2020 (as the qseB_sgRNA_N20)
qseB_sgRNA_com-2	TTCTAGCTCTAAAACTGACGACCTTGTGTAAACCACTGAAACCGCTGCGG	construction of psgRNA-qseB2-33	This study
qseB_sgRNA_N20-2	CCGCAGCGGTTTCAGTGGTTTACACAAGGTCGTCAGTTTTAGAGCTAGAA	construction of psgRNA-qseB2-33	This study
qseB_sgRNA_com-3	TTCTAGCTCTAAAACCTTTTCCCTGACGACCTTGTCTGAAACCGCTGCGG	construction of psgRNA-qseB3-36	This study
qseB_sgRNA_N20-3	CCGCAGCGGTTTCAGACAAGGTCGTCAGGGAAAAGGTTTTAGAGCTAGAA	construction of psgRNA-qseB3-36	This study
qseB_sgRNA_com-4	TTCTAGCTCTAAAACGGTAAGGTTAAATCCAGGATCTGAAACCGCTGCGG	construction of psgRNA-qseB4-1	This study
qseB_sgRNA_N20-4	CCGCAGCGGTTTCAGATCCTGGATTTAACCTTACCGTTTTAGAGCTAGAA	construction of psgRNA-qseB4-1	This study
qseB_sgRNA_com-5	TTCTAGCTCTAAAACGGATTTAACCTTACCAGGCACTGAAACCGCTGCGG	construction of psgRNA-qseB5-1	This study
qseB_sgRNA_N20-5	CCGCAGCGGTTTCAGTGCCTGGTAAGGTTAAATCCGTTTTAGAGCTAGAA	construction of psgRNA-qseB5-1	This study
qseC_sgRNA_com-1	TTCTAGCTCTAAAACTTGTTTGTTTCCAGGCGACACTGAAACCGCTGCGG	construction of psgRNA-qseC1-37	This study
qseC_sgRNA_N20-1	CCGCAGCGGTTTCAGTGTCGCCTGGAAACAAACAAGTTTTAGAGCTAGAA	construction of psgRNA-qseC1-37	This study
qseC_sgRNA_com-2	TTCTAGCTCTAAAACGGAAACAAACAACGGATAACCTGAAACCGCTGCGG	construction of psgRNA-qseC2-16	This study
qseC_sgRNA_N20-2	CCGCAGCGGTTTCAGGTTATCCGTTGTTTGTTTCCGTTTTAGAGCTAGAA	construction of psgRNA-qseC2-16	This study
qseC_sgRNA_com-3	TTCTAGCTCTAAAACCGTTGATTTCGTTGAGATCGCTGAAACCGCTGCGG	construction of psgRNA-qseC3-11	This study
qseC_sgRNA_N20-3	CCGCAGCGGTTTCAGCGATCTCAACGAAATCAACGGTTTTAGAGCTAGAA	construction of psgRNA-qseC3-11	This study
rcnA_sgRNA_com-２	TTCTAGCTCTAAAACGGCGTTTCCTTGCTGAAGAACTGAAACCGCTGCGG	construction of psgRNA-rcnA2-4	This study
rcnA_sgRNA_N20-２	CCGCAGCGGTTTCAGTTCTTCAGCAAGGAAACGCCGTTTTAGAGCTAGAA	construction of psgRNA-rcnA2-4	This study
rcnR_sgRNA_com-4	TTCTAGCTCTAAAACTGATAAACAGAAACTGAAAGCTGAAACCGCTGCGG	construction of psgRNA-rcnR4-1	This study
rcnR_sgRNA_N20-4	CCGCAGCGGTTTCAGCTTTCAGTTTCTGTTTATCAGTTTTAGAGCTAGAA	construction of psgRNA-rcnR4-1	This study
rcsB_sgRNA_com-1	TTCTAGCTCTAAAACAACAAGACTATCGGATGGTCCTGAAACCGCTGCGG	construction of psgRNA-rcsB1-27	This study
rcsB_sgRNA_N20-1	CCGCAGCGGTTTCAGGACCATCCGATAGTCTTGTTGTTTTAGAGCTAGAA	construction of psgRNA-rcsB1-27	This study
rcsB_sgRNA_com-2	TTCTAGCTCTAAAACTCCGATAGTCTTGTTCGGTACTGAAACCGCTGCGG	construction of psgRNA-rcsB2-11	This study
rcsB_sgRNA_N20-2	CCGCAGCGGTTTCAGTACCGAACAAGACTATCGGAGTTTTAGAGCTAGAA	construction of psgRNA-rcsB2-11	This study
rcsB_sgRNA_com-3	TTCTAGCTCTAAAACATAGTCTTGTTCGGTATTCGCTGAAACCGCTGCGG	construction of psgRNA-rcsB3-8	This study
rcsB_sgRNA_N20-3	CCGCAGCGGTTTCAGCGAATACCGAACAAGACTATGTTTTAGAGCTAGAA	construction of psgRNA-rcsB3-8	This study
rcsBup_psgRNA_N20_com-01	GCTATTTCTAGCTCTAAAACGGAACATCCTTCTCACGAATCTGAAACCGCTGCGGCGATG	construction of psgRNA-rcsBup1	This study
rcsBup_psgRNA_N20-01	CATCGCCGCAGCGGTTTCAGATTCGTGAGAAGGATGTTCCGTTTTAGAGCTAGAAATAGC	construction of psgRNA-rcsBup1	This study
rcsBup_psgRNA_N20_com-02	GCTATTTCTAGCTCTAAAACGGAATAGAAAAATACATCAGCTGAAACCGCTGCGGCGATG	construction of psgRNA-rcsBup2	This study
rcsBup_psgRNA_N20-02	CATCGCCGCAGCGGTTTCAGCTGATGTATTTTTCTATTCCGTTTTAGAGCTAGAAATAGC	construction of psgRNA-rcsBup2	This study
rcsBup_psgRNA_N20_com-03	GCTATTTCTAGCTCTAAAACTGCTACAGCAAGCTCTTGACCTGAAACCGCTGCGGCGATG	construction of psgRNA-rcsBup3	This study
rcsBup_psgRNA_N20-03	CATCGCCGCAGCGGTTTCAGGTCAAGAGCTTGCTGTAGCAGTTTTAGAGCTAGAAATAGC	construction of psgRNA-rcsBup3	This study
rcsC_sgRNA_com-1	TTCTAGCTCTAAAACTGAAAGCCTCGCGCTACATGCTGAAACCGCTGCGG	construction of psgRNA-rcsC1-1	This study
rcsC_sgRNA_N20-1	CCGCAGCGGTTTCAGCATGTAGCGCGAGGCTTTCAGTTTTAGAGCTAGAA	construction of psgRNA-rcsC1-1	This study
rcsC_sgRNA_com-2	TTCTAGCTCTAAAACGAAAGCCTCGCGCTACATGTCTGAAACCGCTGCGG	construction of psgRNA-rcsC2-3	This study
rcsC_sgRNA_N20-2	CCGCAGCGGTTTCAGACATGTAGCGCGAGGCTTTCGTTTTAGAGCTAGAA	construction of psgRNA-rcsC2-3	This study
rcsC_sgRNA_com-3	TTCTAGCTCTAAAACCGCGCTACATGTTCAGAGCACTGAAACCGCTGCGG	construction of psgRNA-rcsC3-1	This study
rcsC_sgRNA_N20-3	CCGCAGCGGTTTCAGTGCTCTGAACATGTAGCGCGGTTTTAGAGCTAGAA	construction of psgRNA-rcsC3-1	This study
rcsD_sgRNA_com-1	TTCTAGCTCTAAAACGCTTTTCACTCCTACCGGGGCTGAAACCGCTGCGG	construction of psgRNA-rcsD1-6	This study
rcsD_sgRNA_N20-1	CCGCAGCGGTTTCAGCCCCGGTAGGAGTGAAAAGCGTTTTAGAGCTAGAA	construction of psgRNA-rcsD1-6	This study
rcsD_sgRNA_com-2	TTCTAGCTCTAAAACCTTTTCACTCCTACCGGGGACTGAAACCGCTGCGG	construction of psgRNA-rcsD2-5	This study
rcsD_sgRNA_N20-2	CCGCAGCGGTTTCAGTCCCCGGTAGGAGTGAAAAGGTTTTAGAGCTAGAA	construction of psgRNA-rcsD2-5	This study
rcsD_sgRNA_com-3	TTCTAGCTCTAAAACACCGGGGAGCATTACCCGCTCTGAAACCGCTGCGG	construction of psgRNA-rcsD3-8	This study
rcsD_sgRNA_N20-3	CCGCAGCGGTTTCAGAGCGGGTAATGCTCCCCGGTGTTTTAGAGCTAGAA	construction of psgRNA-rcsD3-8	This study
rcsD_sgRNA_com-4	TTCTAGCTCTAAAACGGGAGCATTACCCGCTTCTTCTGAAACCGCTGCGG	construction of psgRNA-rcsD4-4	This study
rcsD_sgRNA_N20-4	CCGCAGCGGTTTCAGAAGAAGCGGGTAATGCTCCCGTTTTAGAGCTAGAA	construction of psgRNA-rcsD4-4	This study
rcsD_sgRNA_com-5	TTCTAGCTCTAAAACGCTTCTTTTTACTGTTGATCCTGAAACCGCTGCGG	construction of psgRNA-rcsD5-1	This study
rcsD_sgRNA_N20-5	CCGCAGCGGTTTCAGGATCAACAGTAAAAAGAAGCGTTTTAGAGCTAGAA	construction of psgRNA-rcsD5-1	This study
rcsD_sgRNA_com-6	TTCTAGCTCTAAAACCTTCTTTTTACTGTTGATCACTGAAACCGCTGCGG	construction of psgRNA-rcsD6-1	This study
rcsD_sgRNA_N20-6	CCGCAGCGGTTTCAGTGATCAACAGTAAAAAGAAGGTTTTAGAGCTAGAA	construction of psgRNA-rcsD6-1	This study
rcsD_sgRNA_com-7	TTCTAGCTCTAAAACGTAACACAATGATCAACAGTCTGAAACCGCTGCGG	construction of psgRNA-rcsD7-2	This study
rcsD_sgRNA_N20-7	CCGCAGCGGTTTCAGACTGTTGATCATTGTGTTACGTTTTAGAGCTAGAA	construction of psgRNA-rcsD7-2	This study
rcsD_sgRNA_com-8	TTCTAGCTCTAAAACTCGTCACCAGTAACACAATGCTGAAACCGCTGCGG	construction of psgRNA-rcsD8-1	This study
rcsD_sgRNA_N20-8	CCGCAGCGGTTTCAGCATTGTGTTACTGGTGACGAGTTTTAGAGCTAGAA	construction of psgRNA-rcsD8-1	This study
rhlE_psgRNA_N20_com-01	GCTATTTCTAGCTCTAAAACTGATATCCTGCGCGCCGTTGCTGAAACCGCTGCGGCGATG	construction of psgRNA-rhlE1	This study
rhlE_psgRNA_N20-01	CATCGCCGCAGCGGTTTCAGCAACGGCGCGCAGGATATCAGTTTTAGAGCTAGAAATAGC	construction of psgRNA-rhlE1	This study
rhlE_psgRNA_N20_com-02	GCTATTTCTAGCTCTAAAACGATATCCTGCGCGCCGTTGCCTGAAACCGCTGCGGCGATG	construction of psgRNA-rhlE2	This study
rhlE_psgRNA_N20-02	CATCGCCGCAGCGGTTTCAGGCAACGGCGCGCAGGATATCGTTTTAGAGCTAGAAATAGC	construction of psgRNA-rhlE2	This study
rhlE_psgRNA_N20_com-03	GCTATTTCTAGCTCTAAAACGCTCGGCAACGGCGCGCAGGCTGAAACCGCTGCGGCGATG	construction of psgRNA-rhlE3-1	This study
rhlE_psgRNA_N20-03	CATCGCCGCAGCGGTTTCAGCCTGCGCGCCGTTGCCGAGCGTTTTAGAGCTAGAAATAGC	construction of psgRNA-rhlE3-1	This study
rhlE_psgRNA_N20_com-04	GCTATTTCTAGCTCTAAAACGCGCGCCGTTGCCGAGCAGGCTGAAACCGCTGCGGCGATG	construction of psgRNA-rhlE4	This study
rhlE_psgRNA_N20-04	CATCGCCGCAGCGGTTTCAGCCTGCTCGGCAACGGCGCGCGTTTTAGAGCTAGAAATAGC	construction of psgRNA-rhlE4	This study
rhlE_psgRNA_N20_com-05	GCTATTTCTAGCTCTAAAACTGCTCGGCAACGGCGCGCAGCTGAAACCGCTGCGGCGATG	construction of psgRNA-rhlE5-1	This study
rhlE_psgRNA_N20-05	CATCGCCGCAGCGGTTTCAGCTGCGCGCCGTTGCCGAGCAGTTTTAGAGCTAGAAATAGC	construction of psgRNA-rhlE5-1	This study
rhlE_psgRNA_N20_com-06	GCTATTTCTAGCTCTAAAACTTGCCGAGCAGGGTTACCGTCTGAAACCGCTGCGGCGATG	construction of psgRNA-rhlE6	This study
rhlE_psgRNA_N20-06	CATCGCCGCAGCGGTTTCAGACGGTAACCCTGCTCGGCAAGTTTTAGAGCTAGAAATAGC	construction of psgRNA-rhlE6	This study
rob sgRNA_com-1	TTCTAGCTCTAAAACTTTAATCTGGCTGGAAGGTCCTGAAACCGCTGCGG	construction of psgRNA-rob1	This study
rob sgRNA_N20-1	CCGCAGCGGTTTCAGGACCTTCCAGCCAGATTAAAGTTTTAGAGCTAGAA	construction of psgRNA-rob1	This study
rob sgRNA_com-2	TTCTAGCTCTAAAACGATGACCTTCCAGCCAGATTCTGAAACCGCTGCGG	construction of psgRNA-rob2	This study
rob sgRNA_N20-2	CCGCAGCGGTTTCAGAATCTGGCTGGAAGGTCATCGTTTTAGAGCTAGAA	construction of psgRNA-rob2	This study
rob sgRNA_com-3	TTCTAGCTCTAAAACCTGTCGCTCGACAATGTAGCCTGAAACCGCTGCGG	construction of psgRNA-rob3	This study
rob sgRNA_N20-3	CCGCAGCGGTTTCAGGCTACATTGTCGAGCGACAGGTTTTAGAGCTAGAA	construction of psgRNA-rob3	This study
rpoD_sgRNA_com-２	TTCTAGCTCTAAAACTACCACGGGTGACAAGAAGTCTGAAACCGCTGCGG	construction of psgRNA-rpoD2	This study
rpoD_sgRNA_N20-２	CCGCAGCGGTTTCAGACTTCTTGTCACCCGTGGTAGTTTTAGAGCTAGAA	construction of psgRNA-rpoD2	This study
rpoD_sgRNA_com-3	TTCTAGCTCTAAAACTGCTCCTTACCACGGGTGACCTGAAACCGCTGCGG	construction of psgRNA-rpoD3	This study
rpoD_sgRNA_N20-3	CCGCAGCGGTTTCAGGTCACCCGTGGTAAGGAGCAGTTTTAGAGCTAGAA	construction of psgRNA-rpoD3	This study
rpoD_psgRNA_N20_com-04	GCTATTTCTAGCTCTAAAACCAGTCACAGCTGAAACTTCTCTGAAACCGCTGCGGCGATG	construction of psgRNA-rpoD4-2	This study
rpoD_psgRNA_N20-04	CATCGCCGCAGCGGTTTCAGAGAAGTTTCAGCTGTGACTGGTTTTAGAGCTAGAAATAGC	construction of psgRNA-rpoD4-2	This study
rpoD_psgRNA_N20_com-05	GCTATTTCTAGCTCTAAAACCGGGTGACAAGAAGTTTCAGCTGAAACCGCTGCGGCGATG	construction of psgRNA-rpoD5	This study
rpoD_psgRNA_N20-05	CATCGCCGCAGCGGTTTCAGCTGAAACTTCTTGTCACCCGGTTTTAGAGCTAGAAATAGC	construction of psgRNA-rpoD5	This study
rpoD_psgRNA_N20_com-06	GCTATTTCTAGCTCTAAAACGTGGTAAGGAGCAAGGCTATCTGAAACCGCTGCGGCGATG	construction of psgRNA-rpoD6	This study
rpoD_psgRNA_N20-06	CATCGCCGCAGCGGTTTCAGATAGCCTTGCTCCTTACCACGTTTTAGAGCTAGAAATAGC	construction of psgRNA-rpoD6	This study
rpoE_sgRNA_com-1	TTCTAGCTCTAAAACTTCTGGACCCGTTCAACCAGCTGAAACCGCTGCGG	construction of psgRNA-rpoE1	This study
rpoE_sgRNA_N20-1	CCGCAGCGGTTTCAGCTGGTTGAACGGGTCCAGAAGTTTTAGAGCTAGAA	construction of psgRNA-rpoE1	This study
rpoE_sgRNA_com-2	TTCTAGCTCTAAAACTTAACTTACTGGTAGTGCGCCTGAAACCGCTGCGG	construction of psgRNA-rpoE2	This study
rpoE_sgRNA_N20-2	CCGCAGCGGTTTCAGGCGCACTACCAGTAAGTTAAGTTTTAGAGCTAGAA	construction of psgRNA-rpoE2	This study
rpoE_sgRNA_com-3	TTCTAGCTCTAAAACACGGCACATAGCGGGAAACCCTGAAACCGCTGCGG	construction of psgRNA-rpoE3	This study
rpoE_sgRNA_N20-3	CCGCAGCGGTTTCAGGGTTTCCCGCTATGTGCCGTGTTTTAGAGCTAGAA	construction of psgRNA-rpoE3	This study
rpoF_sgRNA_com-1	TTCTAGCTCTAAAACCAGCGAGTGTTTATCCATTACTGAAACCGCTGCGG	construction of psgRNA-rpoF1	This study
rpoF_sgRNA_N20-1	CCGCAGCGGTTTCAGTAATGGATAAACACTCGCTGGTTTTAGAGCTAGAA	construction of psgRNA-rpoF1	This study
rpoF_sgRNA_com-2	TTCTAGCTCTAAAACGCTGGTGCGTCACGAAGCATCTGAAACCGCTGCGG	construction of psgRNA-rpoF2	This study
rpoF_sgRNA_N20-2	CCGCAGCGGTTTCAGATGCTTCGTGACGCACCAGCGTTTTAGAGCTAGAA	construction of psgRNA-rpoF2	This study
rpoF_sgRNA_com-3	TTCTAGCTCTAAAACGTAGCAGATCGTCAAGTTCCCTGAAACCGCTGCGG	construction of psgRNA-rpoF3	This study
rpoF_sgRNA_N20-3	CCGCAGCGGTTTCAGGGAACTTGACGATCTGCTACGTTTTAGAGCTAGAA	construction of psgRNA-rpoF3	This study
rpoH_sgRNA_com-1	TTCTAGCTCTAAAACGATGTAGGAATCCAGGTTGCCTGAAACCGCTGCGG	construction of psgRNA-rpoH1	This study
rpoH_sgRNA_N20-1	CCGCAGCGGTTTCAGGCAACCTGGATTCCTACATCGTTTTAGAGCTAGAA	construction of psgRNA-rpoH1	This study
rpoH_sgRNA_com-2	TTCTAGCTCTAAAACACAACATCGGCCACGCGTTACTGAAACCGCTGCGG	construction of psgRNA-rpoH2	This study
rpoH_sgRNA_N20-2	CCGCAGCGGTTTCAGTAACGCGTGGCCGATGTTGTGTTTTAGAGCTAGAA	construction of psgRNA-rpoH2	This study
rpoH_sgRNA_com-3	TTCTAGCTCTAAAACGATCGCCATGGTAATGCAGCCTGAAACCGCTGCGG	construction of psgRNA-rpoH3	This study
rpoH_sgRNA_N20-3	CCGCAGCGGTTTCAGGCTGCATTACCATGGCGATCGTTTTAGAGCTAGAA	construction of psgRNA-rpoH3	This study
rpoH_psgRNA_N20_com-04	GCTATTTCTAGCTCTAAAACACTGGGGCTAAAGCTAAACTCTGAAACCGCTGCGGCGATG	construction of psgRNA-rpoH4	This study
rpoH_psgRNA_N20-04	CATCGCCGCAGCGGTTTCAGAGTTTAGCTTTAGCCCCAGTGTTTTAGAGCTAGAAATAGC	construction of psgRNA-rpoH4	This study
rpoH_psgRNA_N20_com-05	GCTATTTCTAGCTCTAAAACCAGTTGGCAACCTGGATTCCCTGAAACCGCTGCGGCGATG	construction of psgRNA-rpoH5	This study
rpoH_psgRNA_N20-05	CATCGCCGCAGCGGTTTCAGGGAATCCAGGTTGCCAACTGGTTTTAGAGCTAGAAATAGC	construction of psgRNA-rpoH5	This study
rpoH_psgRNA_N20_com-06	GCTATTTCTAGCTCTAAAACGGATTCCTACATCCGGGCAGCTGAAACCGCTGCGGCGATG	construction of psgRNA-rpoH6-1	This study
rpoH_psgRNA_N20-06	CATCGCCGCAGCGGTTTCAGCTGCCCGGATGTAGGAATCCGTTTTAGAGCTAGAAATAGC	construction of psgRNA-rpoH6-1	This study
rpoN_sgRNA_com-1	TTCTAGCTCTAAAACGTTGGAGCTGTGGCGTCATCCTGAAACCGCTGCGG	construction of psgRNA-rpoN1	This study
rpoN_sgRNA_N20-1	CCGCAGCGGTTTCAGGATGACGCCACAGCTCCAACGTTTTAGAGCTAGAA	construction of psgRNA-rpoN1	This study
rpoN_sgRNA_com-2	TTCTAGCTCTAAAACGCGTCGACAACTGCAACAGACTGAAACCGCTGCGG	construction of psgRNA-rpoN2	This study
rpoN_sgRNA_N20-2	CCGCAGCGGTTTCAGTCTGTTGCAGTTGTCGACGCGTTTTAGAGCTAGAA	construction of psgRNA-rpoN2	This study
rpoN_sgRNA_com-3	TTCTAGCTCTAAAACCTGCTTGAGCAAATCGACACCTGAAACCGCTGCGG	construction of psgRNA-rpoN3	This study
rpoN_sgRNA_N20-3	CCGCAGCGGTTTCAGGTGTCGATTTGCTCAAGCAGGTTTTAGAGCTAGAA	construction of psgRNA-rpoN3	This study
rpoN_psgRNA_N20_com-04	GCTATTTCTAGCTCTAAAACGAGTTGCAAACCTTGCTTCACTGAAACCGCTGCGGCGATG	construction of psgRNA-rpoN4	This study
rpoN_psgRNA_N20-04	CATCGCCGCAGCGGTTTCAGTGAAGCAAGGTTTGCAACTCGTTTTAGAGCTAGAAATAGC	construction of psgRNA-rpoN4	This study
rpoN_psgRNA_N20_com-05	GCTATTTCTAGCTCTAAAACGTTGTTGGCTAAGCCTGAGTCTGAAACCGCTGCGGCGATG	construction of psgRNA-rpoN5	This study
rpoN_psgRNA_N20-05	CATCGCCGCAGCGGTTTCAGACTCAGGCTTAGCCAACAACGTTTTAGAGCTAGAAATAGC	construction of psgRNA-rpoN5	This study
rpoN_psgRNA_N20_com-06	GCTATTTCTAGCTCTAAAACACAACTGGCGATGACGCCACCTGAAACCGCTGCGGCGATG	construction of psgRNA-rpoN6	This study
rpoN_psgRNA_N20-06	CATCGCCGCAGCGGTTTCAGGTGGCGTCATCGCCAGTTGTGTTTTAGAGCTAGAAATAGC	construction of psgRNA-rpoN6	This study
rpoN_psgRNA_N20_com-07	GCTATTTCTAGCTCTAAAACCAGCTCCAACAGGCAATTCGCTGAAACCGCTGCGGCGATG	construction of psgRNA-rpoN7-1	This study
rpoN_psgRNA_N20-07	CATCGCCGCAGCGGTTTCAGCGAATTGCCTGTTGGAGCTGGTTTTAGAGCTAGAAATAGC	construction of psgRNA-rpoN7-1	This study
rpoN_psgRNA_N20_com-08	GCTATTTCTAGCTCTAAAACACAGGCAATTCGTCTGTTGCCTGAAACCGCTGCGGCGATG	construction of psgRNA-rpoN8-2	This study
rpoN_psgRNA_N20-08	CATCGCCGCAGCGGTTTCAGGCAACAGACGAATTGCCTGTGTTTTAGAGCTAGAAATAGC	construction of psgRNA-rpoN8-2	This study
rpoN_psgRNA_N20_com-09	GCTATTTCTAGCTCTAAAACGCTGAAGTTCCAGCGTCGACCTGAAACCGCTGCGGCGATG	construction of psgRNA-rpoN9	This study
rpoN_psgRNA_N20-09	CATCGCCGCAGCGGTTTCAGGTCGACGCTGGAACTTCAGCGTTTTAGAGCTAGAAATAGC	construction of psgRNA-rpoN9	This study
rpoS_sgRNA_com-1	TTCTAGCTCTAAAACTTCTCATCAAATTCCGCATCCTGAAACCGCTGCGG	construction of psgRNA-rpoS1	This study
rpoS_sgRNA_N20-1	CCGCAGCGGTTTCAGGATGCGGAATTTGATGAGAAGTTTTAGAGCTAGAA	construction of psgRNA-rpoS1	This study
rpoS_psgRNA_N20_com-10	GCTATTTCTAGCTCTAAAACGTGATAACGATTTGGCCGAACTGAAACCGCTGCGGCGATG	construction of psgRNA-rpoS10	This study
rpoS_psgRNA_N20-10	CATCGCCGCAGCGGTTTCAGTTCGGCCAAATCGTTATCACGTTTTAGAGCTAGAAATAGC	construction of psgRNA-rpoS10	This study
rpoS_psgRNA_N20_com-11	GCTATTTCTAGCTCTAAAACCTTCGGCCAAATCGTTATCACTGAAACCGCTGCGGCGATG	construction of psgRNA-rpoS11	This study
rpoS_psgRNA_N20-11	CATCGCCGCAGCGGTTTCAGTGATAACGATTTGGCCGAAGGTTTTAGAGCTAGAAATAGC	construction of psgRNA-rpoS11	This study
rpoS_psgRNA_N20_com-12	GCTATTTCTAGCTCTAAAACAAGAGGAACTGTTATCGCAGCTGAAACCGCTGCGGCGATG	construction of psgRNA-rpoS12	This study
rpoS_psgRNA_N20-12	CATCGCCGCAGCGGTTTCAGCTGCGATAACAGTTCCTCTTGTTTTAGAGCTAGAAATAGC	construction of psgRNA-rpoS12	This study
rpoS_psgRNA_N20_com-13	GCTATTTCTAGCTCTAAAACGCGATAACAGTTCCTCTTCGCTGAAACCGCTGCGGCGATG	construction of psgRNA-rpoS13	This study
rpoS_psgRNA_N20-13	CATCGCCGCAGCGGTTTCAGCGAAGAGGAACTGTTATCGCGTTTTAGAGCTAGAAATAGC	construction of psgRNA-rpoS13	This study
rpoS_psgRNA_N20_com-14	GCTATTTCTAGCTCTAAAACTGCGATAACAGTTCCTCTTCCTGAAACCGCTGCGGCGATG	construction of psgRNA-rpoS14	This study
rpoS_psgRNA_N20-14	CATCGCCGCAGCGGTTTCAGGAAGAGGAACTGTTATCGCAGTTTTAGAGCTAGAAATAGC	construction of psgRNA-rpoS14	This study
rpoS_psgRNA_N20_com-15	GCTATTTCTAGCTCTAAAACCACAGCGTGTGTTGGACGCGCTGAAACCGCTGCGGCGATG	construction of psgRNA-rpoS15	This study
rpoS_psgRNA_N20-15	CATCGCCGCAGCGGTTTCAGCGCGTCCAACACACGCTGTGGTTTTAGAGCTAGAAATAGC	construction of psgRNA-rpoS15	This study
rpoS_psgRNA_N20_com-16	GCTATTTCTAGCTCTAAAACAGGTAAAGCTGAGTCGCGTCCTGAAACCGCTGCGGCGATG	construction of psgRNA-rpoS16	This study
rpoS_psgRNA_N20-16	CATCGCCGCAGCGGTTTCAGGACGCGACTCAGCTTTACCTGTTTTAGAGCTAGAAATAGC	construction of psgRNA-rpoS16	This study
rpoS_sgRNA_com-2	TTCTAGCTCTAAAACGTTCTACTAAGGCCTTTTCGCTGAAACCGCTGCGG	construction of psgRNA-rpoS2	This study
rpoS_sgRNA_N20-2	CCGCAGCGGTTTCAGCGAAAAGGCCTTAGTAGAACGTTTTAGAGCTAGAA	construction of psgRNA-rpoS2	This study
rpoS_sgRNA_com-3	TTCTAGCTCTAAAACACACACGCTGTGTGGCTCCCCTGAAACCGCTGCGG	construction of psgRNA-rpoS3	This study
rpoS_sgRNA_N20-3	CCGCAGCGGTTTCAGGGGAGCCACACAGCGTGTGTGTTTTAGAGCTAGAA	construction of psgRNA-rpoS3	This study
rpoS_psgRNA_N20_com-04	GCTATTTCTAGCTCTAAAACCATCTTCATTTAAATCATGACTGAAACCGCTGCGGCGATG	construction of psgRNA-rpoS4	This study
rpoS_psgRNA_N20-04	CATCGCCGCAGCGGTTTCAGTCATGATTTAAATGAAGATGGTTTTAGAGCTAGAAATAGC	construction of psgRNA-rpoS4	This study
rpoS_psgRNA_N20_com-05	GCTATTTCTAGCTCTAAAACCAACTCCGTTCTCATCAAATCTGAAACCGCTGCGGCGATG	construction of psgRNA-rpoS5	This study
rpoS_psgRNA_N20-05	CATCGCCGCAGCGGTTTCAGATTTGATGAGAACGGAGTTGGTTTTAGAGCTAGAAATAGC	construction of psgRNA-rpoS5	This study
rpoS_psgRNA_N20_com-06	GCTATTTCTAGCTCTAAAACTTTCGTCAAAAACCTCAACTCTGAAACCGCTGCGGCGATG	construction of psgRNA-rpoS6	This study
rpoS_psgRNA_N20-06	CATCGCCGCAGCGGTTTCAGAGTTGAGGTTTTTGACGAAAGTTTTAGAGCTAGAAATAGC	construction of psgRNA-rpoS6	This study
rpoS_psgRNA_N20_com-07	GCTATTTCTAGCTCTAAAACTAGTAGAACAGGAACCCAGTCTGAAACCGCTGCGGCGATG	construction of psgRNA-rpoS7	This study
rpoS_psgRNA_N20-07	CATCGCCGCAGCGGTTTCAGACTGGGTTCCTGTTCTACTAGTTTTAGAGCTAGAAATAGC	construction of psgRNA-rpoS7	This study
rpoS_psgRNA_N20_com-08	GCTATTTCTAGCTCTAAAACAATCGTTATCACTGGGTTCCCTGAAACCGCTGCGGCGATG	construction of psgRNA-rpoS8-1	This study
rpoS_psgRNA_N20-08	CATCGCCGCAGCGGTTTCAGGGAACCCAGTGATAACGATTGTTTTAGAGCTAGAAATAGC	construction of psgRNA-rpoS8-1	This study
rpoS_psgRNA_N20_com-09	GCTATTTCTAGCTCTAAAACAGCCGGTTTAGCAATAGTGACTGAAACCGCTGCGGCGATG	construction of psgRNA-rpoS9-1	This study
rpoS_psgRNA_N20-09	CATCGCCGCAGCGGTTTCAGTCGGCCAAATCGTTATCACTGTTTTAGAGCTAGAAATAGC	construction of psgRNA-rpoS9-1	This study
rseP_psgRNA_N20_com-01	GCTATTTCTAGCTCTAAAACCAGCCGTCAGGCTATCAATACTGAAACCGCTGCGGCGATG	construction of psgRNA-rsePp1	This study
rseP_psgRNA_N20-01	CATCGCCGCAGCGGTTTCAGTATTGATAGCCTGACGGCTGGTTTTAGAGCTAGAAATAGC	construction of psgRNA-rsePp1	This study
rseP_psgRNA_N20_com-02	GCTATTTCTAGCTCTAAAACTCAGGCTATCAATACGATCTCTGAAACCGCTGCGGCGATG	construction of psgRNA-rsePp2	This study
rseP_psgRNA_N20-02	CATCGCCGCAGCGGTTTCAGAGATCGTATTGATAGCCTGAGTTTTAGAGCTAGAAATAGC	construction of psgRNA-rsePp2	This study
rseP_psgRNA_N20_com-03	GCTATTTCTAGCTCTAAAACGGACACGGTGGTATTTTAGACTGAAACCGCTGCGGCGATG	construction of psgRNA-rsePp3	This study
rseP_psgRNA_N20-03	CATCGCCGCAGCGGTTTCAGTCTAAAATACCACCGTGTCCGTTTTAGAGCTAGAAATAGC	construction of psgRNA-rsePp3	This study
rssB_sgRNA_com-1	TTCTAGCTCTAAAACGAAGCGAGCGAAATACCTGCCTGAAACCGCTGCGG	construction of psgRNA-rssB1-8	This study
rssB_sgRNA_N20-1	CCGCAGCGGTTTCAGGCAGGTATTTCGCTCGCTTCGTTTTAGAGCTAGAA	construction of psgRNA-rssB1-8	This study
rssB_sgRNA_com-2	TTCTAGCTCTAAAACTGAATCCAGAAGCGAGCGAACTGAAACCGCTGCGG	construction of psgRNA-rssB2-5	This study
rssB_sgRNA_N20-2	CCGCAGCGGTTTCAGTTCGCTCGCTTCTGGATTCAGTTTTAGAGCTAGAA	construction of psgRNA-rssB2-5	This study
rssB_sgRNA_com-3	TTCTAGCTCTAAAACTTGTCGCTCCCAATGAGGAACTGAAACCGCTGCGG	construction of psgRNA-rssB3-7	This study
rssB_sgRNA_N20-3	CCGCAGCGGTTTCAGTTCCTCATTGGGAGCGACAAGTTTTAGAGCTAGAA	construction of psgRNA-rssB3-7	This study
rstA_sgRNA_com-1	TTCTAGCTCTAAAACGCATATCATGTTTTGCCAGGCTGAAACCGCTGCGG	construction of psgRNA-rstA1-4	This study
rstA_sgRNA_N20-1	CCGCAGCGGTTTCAGCCTGGCAAAACATGATATGCGTTTTAGAGCTAGAA	construction of psgRNA-rstA1-4	This study
rstA _sgRNA_com-2	TTCTAGCTCTAAAACTTTGTCGTGATTTACGCGCACTGAAACCGCTGCGG	construction of psgRNA-rstA2-21	This study
rstA_sgRNA_N20-2	CCGCAGCGGTTTCAGTGCGCGTAAATCACGACAAAGTTTTAGAGCTAGAA	construction of psgRNA-rstA2-21	This study
rstA _sgRNA_com-3	TTCTAGCTCTAAAACCTTTGCGCGTAAATCACGACCTGAAACCGCTGCGG	construction of psgRNA-rstA3-7	This study
rstA_sgRNA_N20-3	CCGCAGCGGTTTCAGGTCGTGATTTACGCGCAAAGGTTTTAGAGCTAGAA	construction of psgRNA-rstA3-7	This study
rstA_sgRNA_com-4	TTCTAGCTCTAAAACGACCACTTTGCGCGTAAATCCTGAAACCGCTGCGG	construction of psgRNA-rstA4-4	This study
rstA_sgRNA_N20-4	CCGCAGCGGTTTCAGGATTTACGCGCAAAGTGGTCGTTTTAGAGCTAGAA	construction of psgRNA-rstA4-4	This study
rstA_sgRNA_com-5	TTCTAGCTCTAAAACATTGTTCTTCTAACCTCTCTCTGAAACCGCTGCGG	construction of psgRNA-rstA5-1	This study
rstA_sgRNA_N20-5	CCGCAGCGGTTTCAGAGAGAGGTTAGAAGAACAATGTTTTAGAGCTAGAA	construction of psgRNA-rstA5-1	This study
rstA_sgRNA_com-6	TTCTAGCTCTAAAACACTTCCGCATCATCTTCCACCTGAAACCGCTGCGG	construction of psgRNA-rstA6-19	This study
rstA_sgRNA_N20-6	CCGCAGCGGTTTCAGGTGGAAGATGATGCGGAAGTGTTTTAGAGCTAGAA	construction of psgRNA-rstA6-19	This study
rstA_sgRNA_com-7	TTCTAGCTCTAAAACGGTACGCGGCAATCAGTGAACTGAAACCGCTGCGG	construction of psgRNA-rstA7-15	Miyake et al, 2020 (as the rstA_sgRNA_com)
rstA_sgRNA_N20-7	CCGCAGCGGTTTCAGTTCACTGATTGCCGCGTACCGTTTTAGAGCTAGAA	construction of psgRNA-rstA7-15	Miyake et al, 2020 (as the rstA_sgRNA_N20)
rstA_sgRNA_com-8	TTCTAGCTCTAAAACCGCGGCTCTACGGTAACCTGCTGAAACCGCTGCGG	construction of psgRNA-rstA8-1	This study
rstA_sgRNA_N20-8	CCGCAGCGGTTTCAGCAGGTTACCGTAGAGCCGCGGTTTTAGAGCTAGAA	construction of psgRNA-rstA8-1	This study
rstB_sgRNA_com-1	TTCTAGCTCTAAAACTGTGATGTCTCTGCTGGTTGCTGAAACCGCTGCGG	construction of psgRNA-rstB1-79	This study
rstB_sgRNA_N20-1	CCGCAGCGGTTTCAGCAACCAGCAGAGACATCACAGTTTTAGAGCTAGAA	construction of psgRNA-rstB1-79	This study
rstB_sgRNA_com-2	TTCTAGCTCTAAAACCCGAACGCGCGGGCAAACAGCTGAAACCGCTGCGG	construction of psgRNA-rstB2-5	This study
rstB_sgRNA_N20-2	CCGCAGCGGTTTCAGCTGTTTGCCCGCGCGTTCGGGTTTTAGAGCTAGAA	construction of psgRNA-rstB2-5	This study
rstB_sgRNA_com-3	TTCTAGCTCTAAAACGCGACTGTTTGCCCGCGCGTCTGAAACCGCTGCGG	construction of psgRNA-rstB3-5	This study
rstB_sgRNA_N20-3	CCGCAGCGGTTTCAGACGCGCGGGCAAACAGTCGCGTTTTAGAGCTAGAA	construction of psgRNA-rstB3-5	This study
rstB_sgRNA_com-4	TTCTAGCTCTAAAACGTTATTGTTTGTCTGCTTCCCTGAAACCGCTGCGG	construction of psgRNA-rstB4-5	This study
rstB_sgRNA_N20-4	CCGCAGCGGTTTCAGGGAAGCAGACAAACAATAACGTTTTAGAGCTAGAA	construction of psgRNA-rstB4-5	This study
rstB_sgRNA_com-5	TTCTAGCTCTAAAACGCAGAGACATCACAAGGAAGCTGAAACCGCTGCGG	construction of psgRNA-rstB5-1	This study
rstB_sgRNA_N20-5	CCGCAGCGGTTTCAGCTTCCTTGTGATGTCTCTGCGTTTTAGAGCTAGAA	construction of psgRNA-rstB5-1	This study
sdaC_psgRNA_N20_com-01	GCTATTTCTAGCTCTAAAACGCACGATTGCGTCGAAAGACCTGAAACCGCTGCGGCGATG	construction of psgRNA-sdaC1	This study
sdaC_psgRNA_N20-01	CATCGCCGCAGCGGTTTCAGGTCTTTCGACGCAATCGTGCGTTTTAGAGCTAGAAATAGC	construction of psgRNA-sdaC1	This study
sdaC_psgRNA_N20_com-02	GCTATTTCTAGCTCTAAAACGGCACTACGAGAGTCTTTCGCTGAAACCGCTGCGGCGATG	construction of psgRNA-sdaC2	This study
sdaC_psgRNA_N20-02	CATCGCCGCAGCGGTTTCAGCGAAAGACTCTCGTAGTGCCGTTTTAGAGCTAGAAATAGC	construction of psgRNA-sdaC2	This study
sdaC_psgRNA_N20_com-03	GCTATTTCTAGCTCTAAAACGGCGCAAGACAGACACCATGCTGAAACCGCTGCGGCGATG	construction of psgRNA-sdaC3	This study
sdaC_psgRNA_N20-03	CATCGCCGCAGCGGTTTCAGCATGGTGTCTGTCTTGCGCCGTTTTAGAGCTAGAAATAGC	construction of psgRNA-sdaC3	This study
sdhA_psgRNA_N20_com-01	GCTATTTCTAGCTCTAAAACCACACCACAACGAATCCATACTGAAACCGCTGCGGCGATG	construction of psgRNA-sdhA1	This study
sdhA_psgRNA_N20-01	CATCGCCGCAGCGGTTTCAGTATGGATTCGTTGTGGTGTGGTTTTAGAGCTAGAAATAGC	construction of psgRNA-sdhA1	This study
sdhA_psgRNA_N20_com-02	GCTATTTCTAGCTCTAAAACGTCAGAGAATTTGATGCAGTCTGAAACCGCTGCGGCGATG	construction of psgRNA-sdhA2	This study
sdhA_psgRNA_N20-02	CATCGCCGCAGCGGTTTCAGACTGCATCAAATTCTCTGACGTTTTAGAGCTAGAAATAGC	construction of psgRNA-sdhA2	This study
sdhA_psgRNA_N20_com-03	GCTATTTCTAGCTCTAAAACATCACAACTGCATCAAATTCCTGAAACCGCTGCGGCGATG	construction of psgRNA-sdhA3	This study
sdhA_psgRNA_N20-03	CATCGCCGCAGCGGTTTCAGGAATTTGATGCAGTTGTGATGTTTTAGAGCTAGAAATAGC	construction of psgRNA-sdhA3	This study
soxS sgRNA_com-1	TTCTAGCTCTAAAACGCCGCTTAACATTGATGTAGCTGAAACCGCTGCGG	construction of psgRNA-soxS1	This study
soxS sgRNA_N20-1	CCGCAGCGGTTTCAGCTACATCAATGTTAAGCGGCGTTTTAGAGCTAGAA	construction of psgRNA-soxS1	This study
soxS sgRNA_com-2	TTCTAGCTCTAAAACGATTTTTTTGCGACTACATCCTGAAACCGCTGCGG	construction of psgRNA-soxS2	This study
soxS sgRNA_N20-2	CCGCAGCGGTTTCAGGATGTAGTCGCAAAAAAATCGTTTTAGAGCTAGAA	construction of psgRNA-soxS2	This study
soxS sgRNA_com-3	TTCTAGCTCTAAAACCTTTGAATAGCCTGATTTTTCTGAAACCGCTGCGG	construction of psgRNA-soxS3	This study
soxS sgRNA_N20-3	CCGCAGCGGTTTCAGAAAAATCAGGCTATTCAAAGGTTTTAGAGCTAGAA	construction of psgRNA-soxS3	This study
sstT_psgRNA_N20_com-01	GCTATTTCTAGCTCTAAAACGGTGAACGTTGCGTAGTCATCTGAAACCGCTGCGGCGATG	construction of psgRNA-sstT1	This study
sstT_psgRNA_N20-01	CATCGCCGCAGCGGTTTCAGATGACTACGCAACGTTCACCGTTTTAGAGCTAGAAATAGC	construction of psgRNA-sstT1	This study
sstT_psgRNA_N20_com-02	GCTATTTCTAGCTCTAAAACCGGTGAACGTTGCGTAGTCACTGAAACCGCTGCGGCGATG	construction of psgRNA-sstT2	This study
sstT_psgRNA_N20-02	CATCGCCGCAGCGGTTTCAGTGACTACGCAACGTTCACCGGTTTTAGAGCTAGAAATAGC	construction of psgRNA-sstT2	This study
sstT_psgRNA_N20_com-03	GCTATTTCTAGCTCTAAAACGAATAGCCCCGGTGAACGTTCTGAAACCGCTGCGGCGATG	construction of psgRNA-sstT3	This study
sstT_psgRNA_N20-03	CATCGCCGCAGCGGTTTCAGAACGTTCACCGGGGCTATTCGTTTTAGAGCTAGAAATAGC	construction of psgRNA-sstT3	This study
stpA_sgRNA_com_1	TTCTAGCTCTAAAACTCGCACGGAGGGTGCGAATGCTGAAACCGCTGCGG	construction of psgRNA-stpA1-23	This study
stpA_sgRNA_N20_1	CCGCAGCGGTTTCAGCATTCGCACCCTCCGTGCGAGTTTTAGAGCTAGAA	construction of psgRNA-stpA1-23	This study
stpA_sgRNA_com_2	TTCTAGCTCTAAAACTCCGTGCGATGGCTCGCGAACTGAAACCGCTGCGG	construction of psgRNA-stpA2-5	This study
stpA_sgRNA_N20_2	CCGCAGCGGTTTCAGTTCGCGAGCCATCGCACGGAGTTTTAGAGCTAGAA	construction of psgRNA-stpA2-5	This study
stpA_sgRNA_com_3	TTCTAGCTCTAAAACCCGTGCGATGGCTCGCGAATCTGAAACCGCTGCGG	construction of psgRNA-stpA3-4	This study
stpA_sgRNA_N20_3	CCGCAGCGGTTTCAGATTCGCGAGCCATCGCACGGGTTTTAGAGCTAGAA	construction of psgRNA-stpA3-4	This study
sucA_psgRNA_N20_com-01	GCTATTTCTAGCTCTAAAACGGCTTTCAAAGCGCTGTTCTCTGAAACCGCTGCGGCGATG	construction of psgRNA-sucA1	This study
sucA_psgRNA_N20-01	CATCGCCGCAGCGGTTTCAGAGAACAGCGCTTTGAAAGCCGTTTTAGAGCTAGAAATAGC	construction of psgRNA-sucA1	This study
sucA_psgRNA_N20_com-02	GCTATTTCTAGCTCTAAAACACCAGGCTTTCAAAGCGCTGCTGAAACCGCTGCGGCGATG	construction of psgRNA-sucA2	This study
sucA_psgRNA_N20-02	CATCGCCGCAGCGGTTTCAGCAGCGCTTTGAAAGCCTGGTGTTTTAGAGCTAGAAATAGC	construction of psgRNA-sucA2	This study
sucA_psgRNA_N20_com-03	GCTATTTCTAGCTCTAAAACGGTTGGACTCTTCTTACCTCCTGAAACCGCTGCGGCGATG	construction of psgRNA-sucA3	This study
sucA_psgRNA_N20-03	CATCGCCGCAGCGGTTTCAGGAGGTAAGAAGAGTCCAACCGTTTTAGAGCTAGAAATAGC	construction of psgRNA-sucA3	This study
sucB_psgRNA_N20_com-01	GCTATTTCTAGCTCTAAAACGGTAACGATCAAAGAGTTGCCTGAAACCGCTGCGGCGATG	construction of psgRNA-sucB1	This study
sucB_psgRNA_N20-01	CATCGCCGCAGCGGTTTCAGGCAACTCTTTGATCGTTACCGTTTTAGAGCTAGAAATAGC	construction of psgRNA-sucB1	This study
sucB_psgRNA_N20_com-02	GCTATTTCTAGCTCTAAAACGCAACTCTTTGATCGTTACCCTGAAACCGCTGCGGCGATG	construction of psgRNA-sucB2	This study
sucB_psgRNA_N20-02	CATCGCCGCAGCGGTTTCAGGGTAACGATCAAAGAGTTGCGTTTTAGAGCTAGAAATAGC	construction of psgRNA-sucB2	This study
sucB_psgRNA_N20_com-03	GCTATTTCTAGCTCTAAAACGCAGCAGACGCGTCGGATCTCTGAAACCGCTGCGGCGATG	construction of psgRNA-sucB3	This study
sucB_psgRNA_N20-03	CATCGCCGCAGCGGTTTCAGAGATCCGACGCGTCTGCTGCGTTTTAGAGCTAGAAATAGC	construction of psgRNA-sucB3	This study
tatD_psgRNA_N20_com-01	GCTATTTCTAGCTCTAAAACGTTCGCAATTTGCGAAAGACCTGAAACCGCTGCGGCGATG	construction of psgRNA-tatD1	This study
tatD_psgRNA_N20-01	CATCGCCGCAGCGGTTTCAGGTCTTTCGCAAATTGCGAACGTTTTAGAGCTAGAAATAGC	construction of psgRNA-tatD1	This study
tatD_psgRNA_N20-02	CATCGCCGCAGCGGTTTCAGCGCACGCTACAACATCATCAGTTTTAGAGCTAGAAATAGC	construction of psgRNA-tatD2-2	This study
tatDpsgRNA_N20_com-02	GCTATTTCTAGCTCTAAAACTGATGATGTTGTAGCGTGCGCTGAAACCGCTGCGGCGATG	construction of psgRNA-tatD2-2	This study
tatD_psgRNA_N20-03	CATCGCCGCAGCGGTTTCAGGTTAATGGGCTACTCATCACGTTTTAGAGCTAGAAATAGC	construction of psgRNA-tatD3-2	This study
tatDpsgRNA_N20_com-03	GCTATTTCTAGCTCTAAAACGTGATGAGTAGCCCATTAACCTGAAACCGCTGCGGCGATG	construction of psgRNA-tatD3-2	This study
tdcB_psgRNA_N20_com-01	GCTATTTCTAGCTCTAAAACGCAGATCGTATGTAATATGCCTGAAACCGCTGCGGCGATG	construction of psgRNA-tdcB1	This study
tdcB_psgRNA_N20-01	CATCGCCGCAGCGGTTTCAGGCATATTACATACGATCTGCGTTTTAGAGCTAGAAATAGC	construction of psgRNA-tdcB1	This study
tdcB_psgRNA_N20_com-02	GCTATTTCTAGCTCTAAAACGTTGCTATTGATGACATTATCTGAAACCGCTGCGGCGATG	construction of psgRNA-tdcB2	This study
tdcB_psgRNA_N20-02	CATCGCCGCAGCGGTTTCAGATAATGTCATCAATAGCAACGTTTTAGAGCTAGAAATAGC	construction of psgRNA-tdcB2	This study
tdcB_psgRNA_N20_com-03	GCTATTTCTAGCTCTAAAACGTCGTTGTTTCGCTTCAATACTGAAACCGCTGCGGCGATG	construction of psgRNA-tdcB3	This study
tdcB_psgRNA_N20-03	CATCGCCGCAGCGGTTTCAGTATTGAAGCGAAACAACGACGTTTTAGAGCTAGAAATAGC	construction of psgRNA-tdcB3	This study
tdcC_psgRNA_N20_com-01	GCTATTTCTAGCTCTAAAACGCCAGACAAAACAATCGTCCCTGAAACCGCTGCGGCGATG	construction of psgRNA-tdcC1	This study
tdcC_psgRNA_N20-01	CATCGCCGCAGCGGTTTCAGGGACGATTGTTTTGTCTGGCGTTTTAGAGCTAGAAATAGC	construction of psgRNA-tdcC1	This study
tdcC_psgRNA_N20_com-02	GCTATTTCTAGCTCTAAAACGGACGATTGTTTTGTCTGGCCTGAAACCGCTGCGGCGATG	construction of psgRNA-tdcC2	This study
tdcC_psgRNA_N20-02	CATCGCCGCAGCGGTTTCAGGCCAGACAAAACAATCGTCCGTTTTAGAGCTAGAAATAGC	construction of psgRNA-tdcC2	This study
tdcC_psgRNA_N20_com-03	GCTATTTCTAGCTCTAAAACGACAAAACAATCGTCCTGGCCTGAAACCGCTGCGGCGATG	construction of psgRNA-tdcC3	This study
tdcC_psgRNA_N20-03	CATCGCCGCAGCGGTTTCAGGCCAGGACGATTGTTTTGTCGTTTTAGAGCTAGAAATAGC	construction of psgRNA-tdcC3	This study
tdcD_psgRNA_N20_com-01	GCTATTTCTAGCTCTAAAACAAACAACCGGAAATTCATTCCTGAAACCGCTGCGGCGATG	construction of psgRNA-tdcD1	This study
tdcD_psgRNA_N20-01	CATCGCCGCAGCGGTTTCAGGAATGAATTTCCGGTTGTTTGTTTTAGAGCTAGAAATAGC	construction of psgRNA-tdcD1	This study
tdcD_psgRNA_N20_com-02	GCTATTTCTAGCTCTAAAACGTTGTTTTGGTTATTAACTGCTGAAACCGCTGCGGCGATG	construction of psgRNA-tdcD2	This study
tdcD_psgRNA_N20-02	CATCGCCGCAGCGGTTTCAGCAGTTAATAACCAAAACAACGTTTTAGAGCTAGAAATAGC	construction of psgRNA-tdcD2	This study
tdcD_psgRNA_N20_com-03	GCTATTTCTAGCTCTAAAACCAGTTAATAACCAAAACAACCTGAAACCGCTGCGGCGATG	construction of psgRNA-tdcD3	This study
tdcD_psgRNA_N20-03	CATCGCCGCAGCGGTTTCAGGTTGTTTTGGTTATTAACTGGTTTTAGAGCTAGAAATAGC	construction of psgRNA-tdcD3	This study
tdcG_psgRNA_N20_com-01	GCTATTTCTAGCTCTAAAACATTTTGAAAATATCGAATGCCTGAAACCGCTGCGGCGATG	construction of psgRNA-tdcG1	This study
tdcG_psgRNA_N20-01	CATCGCCGCAGCGGTTTCAGGCATTCGATATTTTCAAAATGTTTTAGAGCTAGAAATAGC	construction of psgRNA-tdcG1	This study
tdcG_psgRNA_N20_com-02	GCTATTTCTAGCTCTAAAACAATTTTGAAAATATCGAATGCTGAAACCGCTGCGGCGATG	construction of psgRNA-tdcG2	This study
tdcG_psgRNA_N20-02	CATCGCCGCAGCGGTTTCAGCATTCGATATTTTCAAAATTGTTTTAGAGCTAGAAATAGC	construction of psgRNA-tdcG2	This study
tdcG_psgRNA_N20_com-03	GCTATTTCTAGCTCTAAAACATCCCAATTTTGAAAATATCCTGAAACCGCTGCGGCGATG	construction of psgRNA-tdcG3	This study
tdcG_psgRNA_N20-03	CATCGCCGCAGCGGTTTCAGGATATTTTCAAAATTGGGATGTTTTAGAGCTAGAAATAGC	construction of psgRNA-tdcG3	This study
tnaB_psgRNA_N20_com-01	GCTATTTCTAGCTCTAAAACAAATGCAGAGTGCTTTTTTTCTGAAACCGCTGCGGCGATG	construction of psgRNA-tnaB1	This study
tnaB_psgRNA_N20-01	CATCGCCGCAGCGGTTTCAGAAAAAAAGCACTCTGCATTTGTTTTAGAGCTAGAAATAGC	construction of psgRNA-tnaB1	This study
tnaB_psgRNA_N20_com-02	GCTATTTCTAGCTCTAAAACAAAATGCAGAGTGCTTTTTTCTGAAACCGCTGCGGCGATG	construction of psgRNA-tnaB2	This study
tnaB_psgRNA_N20-02	CATCGCCGCAGCGGTTTCAGAAAAAAGCACTCTGCATTTTGTTTTAGAGCTAGAAATAGC	construction of psgRNA-tnaB2	This study
tnaB_psgRNA_N20_com-03	GCTATTTCTAGCTCTAAAACCAAAATGCAGAGTGCTTTTTCTGAAACCGCTGCGGCGATG	construction of psgRNA-tnaB3	This study
tnaB_psgRNA_N20-03	CATCGCCGCAGCGGTTTCAGAAAAAGCACTCTGCATTTTGGTTTTAGAGCTAGAAATAGC	construction of psgRNA-tnaB3	This study
tolC_psgRNA_N20_com-01	GCTATTTCTAGCTCTAAAACATAAGAATGGGGAGCAATTTCTGAAACCGCTGCGGCGATG	construction of psgRNA-tolC1	This study
tolC_psgRNA_N20-01	CATCGCCGCAGCGGTTTCAGAAATTGCTCCCCATTCTTATGTTTTAGAGCTAGAAATAGC	construction of psgRNA-tolC1	This study
tolC_psgRNA_N20_com-02	GCTATTTCTAGCTCTAAAACCATTCTTATCGGCCTGAGCCCTGAAACCGCTGCGGCGATG	construction of psgRNA-tolC2	This study
tolC_psgRNA_N20-02	CATCGCCGCAGCGGTTTCAGGGCTCAGGCCGATAAGAATGGTTTTAGAGCTAGAAATAGC	construction of psgRNA-tolC2	This study
tolC_psgRNA_N20_com-03	GCTATTTCTAGCTCTAAAACATTCTTATCGGCCTGAGCCTCTGAAACCGCTGCGGCGATG	construction of psgRNA-tolC3	This study
tolC_psgRNA_N20-03	CATCGCCGCAGCGGTTTCAGAGGCTCAGGCCGATAAGAATGTTTTAGAGCTAGAAATAGC	construction of psgRNA-tolC3	This study
tolC_psgRNA_N20_com-04	GCTATTTCTAGCTCTAAAACTTCTTATCGGCCTGAGCCTTCTGAAACCGCTGCGGCGATG	construction of psgRNA-tolC4	This study
tolC_psgRNA_N20-04	CATCGCCGCAGCGGTTTCAGAAGGCTCAGGCCGATAAGAAGTTTTAGAGCTAGAAATAGC	construction of psgRNA-tolC4	This study
tolC_psgRNA_N20_com-05	GCTATTTCTAGCTCTAAAACGAAAGGCTCAGGCCGATAAGCTGAAACCGCTGCGGCGATG	construction of psgRNA-tolC5	This study
tolC_psgRNA_N20-05	CATCGCCGCAGCGGTTTCAGCTTATCGGCCTGAGCCTTTCGTTTTAGAGCTAGAAATAGC	construction of psgRNA-tolC5	This study
tolC_psgRNA_N20_com-06	GCTATTTCTAGCTCTAAAACAGAAAGGCTCAGGCCGATAACTGAAACCGCTGCGGCGATG	construction of psgRNA-tolC6	This study
tolC_psgRNA_N20-06	CATCGCCGCAGCGGTTTCAGTTATCGGCCTGAGCCTTTCTGTTTTAGAGCTAGAAATAGC	construction of psgRNA-tolC6	This study
torR_sgRNA_com-1	TTCTAGCTCTAAAACGCTCATCTTCAACAATAACACTGAAACCGCTGCGG	construction of psgRNA-torR1-4	Miyake et al, 2020 (as the torR_sgRNA_com)
torR_sgRNA_N20-1	CCGCAGCGGTTTCAGTGTTATTGTTGAAGATGAGCGTTTTAGAGCTAGAA	construction of psgRNA-torR1-4	Miyake et al, 2020 (as the torR_sgRNA_N20)
torR_sgRNA_com-2	TTCTAGCTCTAAAACGGGTAACCGGCTCATCTTCACTGAAACCGCTGCGG	construction of psgRNA-torR2-1	This study
torR_sgRNA_N20-2	CCGCAGCGGTTTCAGTGAAGATGAGCCGGTTACCCGTTTTAGAGCTAGAA	construction of psgRNA-torR2-1	This study
torR_sgRNA_com-3	TTCTAGCTCTAAAACGTTACCCAGGCGCGATTACACTGAAACCGCTGCGG	construction of psgRNA-torR3-1	This study
torR_sgRNA_N20-3	CCGCAGCGGTTTCAGTGTAATCGCGCCTGGGTAACGTTTTAGAGCTAGAA	construction of psgRNA-torR3-1	This study
torS_sgRNA_com-1	TTCTAGCTCTAAAACTCAGGGCAAAGCCCATCCAGCTGAAACCGCTGCGG	construction of psgRNA-torS1-2	This study
torS_sgRNA_N20-1	CCGCAGCGGTTTCAGCTGGATGGGCTTTGCCCTGAGTTTTAGAGCTAGAA	construction of psgRNA-torS1-2	This study
torS_sgRNA_com-2	TTCTAGCTCTAAAACTGATGGCGCTGTTAACCCTGCTGAAACCGCTGCGG	construction of psgRNA-torS2-3	This study
torS_sgRNA_N20-2	CCGCAGCGGTTTCAGCAGGGTTAACAGCGCCATCAGTTTTAGAGCTAGAA	construction of psgRNA-torS2-3	This study
torS_sgRNA_com-3	TTCTAGCTCTAAAACGATGGCGCTGTTAACCCTGACTGAAACCGCTGCGG	construction of psgRNA-torS3-2	This study
torS_sgRNA_N20-3	CCGCAGCGGTTTCAGTCAGGGTTAACAGCGCCATCGTTTTAGAGCTAGAA	construction of psgRNA-torS3-2	This study
trkH_sgRNA_com-1	TTCTAGCTCTAAAACACGATTCGGGTAATGGCGCGCTGAAACCGCTGCGG	construction of psgRNA-trkH1-1	This study
trkH_sgRNA_N20-1	CCGCAGCGGTTTCAGCGCGCCATTACCCGAATCGTGTTTTAGAGCTAGAA	construction of psgRNA-trkH1-1	This study
trkH_sgRNA_com-3	TTCTAGCTCTAAAACGTAGTCCAACGATTCGGGTACTGAAACCGCTGCGG	construction of psgRNA-trkH3-16	This study
trkH_sgRNA_N20-3	CCGCAGCGGTTTCAGTACCCGAATCGTTGGACTACGTTTTAGAGCTAGAA	construction of psgRNA-trkH3-16	This study
trkH_sgRNA_com-4	TTCTAGCTCTAAAACGAATCGTTGGACTACTGGTCCTGAAACCGCTGCGG	construction of psgRNA-trkH4-2	This study
trkH_sgRNA_N20-4	CCGCAGCGGTTTCAGGACCAGTAGTCCAACGATTCGTTTTAGAGCTAGAA	construction of psgRNA-trkH4-2	This study
trpC_psgRNA_N20_com-01	GCTATTTCTAGCTCTAAAACTGTCTGCGACGATTTTCGCTCTGAAACCGCTGCGGCGATG	construction of psgRNA-trpC1	This study
trpC_psgRNA_N20-01	CATCGCCGCAGCGGTTTCAGAGCGAAAATCGTCGCAGACAGTTTTAGAGCTAGAAATAGC	construction of psgRNA-trpC1	This study
trpC_psgRNA_N20_com-02	GCTATTTCTAGCTCTAAAACAAATCGCCTTGTCTGCGACGCTGAAACCGCTGCGGCGATG	construction of psgRNA-trpC2	This study
trpC_psgRNA_N20-02	CATCGCCGCAGCGGTTTCAGCGTCGCAGACAAGGCGATTTGTTTTAGAGCTAGAAATAGC	construction of psgRNA-trpC2	This study
trpC_psgRNA_N20_com-03	GCTATTTCTAGCTCTAAAACGCAAACAGCAGCAACCGCTGCTGAAACCGCTGCGGCGATG	construction of psgRNA-trpC3	This study
trpC_psgRNA_N20-03	CATCGCCGCAGCGGTTTCAGCAGCGGTTGCTGCTGTTTGCGTTTTAGAGCTAGAAATAGC	construction of psgRNA-trpC3	This study
trpC_psgRNA_N20_com-04	GCTATTTCTAGCTCTAAAACAATCGCCTTGTCTGCGACGACTGAAACCGCTGCGGCGATG	construction of psgRNA-trpC4	This study
trpC_psgRNA_N20-04	CATCGCCGCAGCGGTTTCAGTCGTCGCAGACAAGGCGATTGTTTTAGAGCTAGAAATAGC	construction of psgRNA-trpC4	This study
trpC_psgRNA_N20_com-05	GCTATTTCTAGCTCTAAAACGCGGTTGCTGCTGTTTGCGGCTGAAACCGCTGCGGCGATG	construction of psgRNA-trpC5	This study
trpC_psgRNA_N20-05	CATCGCCGCAGCGGTTTCAGCCGCAAACAGCAGCAACCGCGTTTTAGAGCTAGAAATAGC	construction of psgRNA-trpC5	This study
trpC_psgRNA_N20_com-06	GCTATTTCTAGCTCTAAAACCAAACAGCAGCAACCGCTGGCTGAAACCGCTGCGGCGATG	construction of psgRNA-trpC6	This study
trpC_psgRNA_N20-06	CATCGCCGCAGCGGTTTCAGCCAGCGGTTGCTGCTGTTTGGTTTTAGAGCTAGAAATAGC	construction of psgRNA-trpC6	This study
uhpA_sgRNA_com-1	TTCTAGCTCTAAAACGAGCGGACGATGAGGTGATCCTGAAACCGCTGCGG	construction of psgRNA-uhpA1-43	This study
uhpA_sgRNA_N20-1	CCGCAGCGGTTTCAGGATCACCTCATCGTCCGCTCGTTTTAGAGCTAGAA	construction of psgRNA-uhpA1-43	This study
uhpA_sgRNA_com-2	TTCTAGCTCTAAAACCATCGTCCGCTCCGGCTTTGCTGAAACCGCTGCGG	construction of psgRNA-uhpA2-49	This study
uhpA_sgRNA_N20-2	CCGCAGCGGTTTCAGCAAAGCCGGAGCGGACGATGGTTTTAGAGCTAGAA	construction of psgRNA-uhpA2-49	This study
uhpA_sgRNA_com-3	TTCTAGCTCTAAAACCTCCGGCTTTGCGCAGCTGCCTGAAACCGCTGCGG	construction of psgRNA-uhpA3-49	This study
uhpA_sgRNA_N20-3	CCGCAGCGGTTTCAGGCAGCTGCGCAAAGCCGGAGGTTTTAGAGCTAGAA	construction of psgRNA-uhpA3-49	This study
uhpA_psgRNA_N20_com-04	GCTATTTCTAGCTCTAAAACTGCCCGATATCTCCGGTCTGCTGAAACCGCTGCGGCGATG	construction of psgRNA-uhpA4	This study
uhpA_psgRNA_N20-04	CATCGCCGCAGCGGTTTCAGCAGACCGGAGATATCGGGCAGTTTTAGAGCTAGAAATAGC	construction of psgRNA-uhpA4	This study
uhpA_psgRNA_N20_com-05	GCTATTTCTAGCTCTAAAACGATATCTCCGGTCTGGAGCTCTGAAACCGCTGCGGCGATG	construction of psgRNA-uhpA5	This study
uhpA_psgRNA_N20-05	CATCGCCGCAGCGGTTTCAGAGCTCCAGACCGGAGATATCGTTTTAGAGCTAGAAATAGC	construction of psgRNA-uhpA5	This study
uhpA_psgRNA_N20_com-06	GCTATTTCTAGCTCTAAAACATATCTCCGGTCTGGAGCTGCTGAAACCGCTGCGGCGATG	construction of psgRNA-uhpA6	This study
uhpA_psgRNA_N20-06	CATCGCCGCAGCGGTTTCAGCAGCTCCAGACCGGAGATATGTTTTAGAGCTAGAAATAGC	construction of psgRNA-uhpA6	This study
uhpA_psgRNA_N20_com-07	GCTATTTCTAGCTCTAAAACGTCTGGAGCTGCTAAGCCAGCTGAAACCGCTGCGGCGATG	construction of psgRNA-uhpA7	This study
uhpA_psgRNA_N20-07	CATCGCCGCAGCGGTTTCAGCTGGCTTAGCAGCTCCAGACGTTTTAGAGCTAGAAATAGC	construction of psgRNA-uhpA7	This study
uhpB_sgRNA_com-1	TTCTAGCTCTAAAACCATGGTTTTGCCTGTGGAGTCTGAAACCGCTGCGG	construction of psgRNA-uhpB1-11	This study
uhpB_sgRNA_N20-1	CCGCAGCGGTTTCAGACTCCACAGGCAAAACCATGGTTTTAGAGCTAGAA	construction of psgRNA-uhpB1-11	This study
uhpB_sgRNA_com-2	TTCTAGCTCTAAAACGTGGAGTATCAGCCTGCATCCTGAAACCGCTGCGG	construction of psgRNA-uhpB2-3	This study
uhpB_sgRNA_N20-2	CCGCAGCGGTTTCAGGATGCAGGCTGATACTCCACGTTTTAGAGCTAGAA	construction of psgRNA-uhpB2-3	This study
uhpB_sgRNA_com-3	TTCTAGCTCTAAAACGATGCAGGCTGATACTCCACCTGAAACCGCTGCGG	construction of psgRNA-uhpB3-15	This study
uhpB_sgRNA_N20-3	CCGCAGCGGTTTCAGGTGGAGTATCAGCCTGCATCGTTTTAGAGCTAGAA	construction of psgRNA-uhpB3-15	This study
uidA_psgRNA_N20_com-01	GCTATTTCTAGCTCTAAAACTCGAGTTTTTTGATTTCACGCTGAAACCGCTGCGGCGATG	construction of psgRNA-uidA1	This study
uidA_psgRNA_N20-01	CATCGCCGCAGCGGTTTCAGCGTGAAATCAAAAAACTCGAGTTTTAGAGCTAGAAATAGC	construction of psgRNA-uidA1	This study
uidA_psgRNA_N20_com-02	GCTATTTCTAGCTCTAAAACGACTGAATGCCCACAGGCCGCTGAAACCGCTGCGGCGATG	construction of psgRNA-uidA2	This study
uidA_psgRNA_N20-02	CATCGCCGCAGCGGTTTCAGCGGCCTGTGGGCATTCAGTCGTTTTAGAGCTAGAAATAGC	construction of psgRNA-uidA2	This study
uidA_psgRNA_N20_com-03	GCTATTTCTAGCTCTAAAACGGCGTTACCCAACTTAATCGCTGAAACCGCTGCGGCGATG	construction of psgRNA-uidA3	This study
uidA_psgRNA_N20-03	CATCGCCGCAGCGGTTTCAGCGATTAAGTTGGGTAACGCCGTTTTAGAGCTAGAAATAGC	construction of psgRNA-uidA3	This study
uvrY_sgRNA_com-1	TTCTAGCTCTAAAACGTTCGTGGTCATCAACAAGTCTGAAACCGCTGCGG	construction of psgRNA-uvrY1-11	This study
uvrY_sgRNA_N20-1	CCGCAGCGGTTTCAGACTTGTTGATGACCACGAACGTTTTAGAGCTAGAA	construction of psgRNA-uvrY1-11	This study
uvrY_sgRNA_com-2	TTCTAGCTCTAAAACCGAACTGGTGCGCGCAGGGACTGAAACCGCTGCGG	construction of psgRNA-uvrY2-28	This study
uvrY_sgRNA_N20-2	CCGCAGCGGTTTCAGTCCCTGCGCGCACCAGTTCGGTTTTAGAGCTAGAA	construction of psgRNA-uvrY2-28	This study
uvrY_sgRNA_com-3	TTCTAGCTCTAAAACTTATATCTTCCAGAATGCGTCTGAAACCGCTGCGG	construction of psgRNA-uvrY3-28	This study
uvrY_sgRNA_N20-3	CCGCAGCGGTTTCAGACGCATTCTGGAAGATATAAGTTTTAGAGCTAGAA	construction of psgRNA-uvrY3-28	This study
uvrY_sgRNA_com-4	TTCTAGCTCTAAAACGCGCGCACCAGTTCGTGGTCCTGAAACCGCTGCGG	construction of psgRNA-uvrY4-2	This study
uvrY_sgRNA_N20-4	CCGCAGCGGTTTCAGGACCACGAACTGGTGCGCGCGTTTTAGAGCTAGAA	construction of psgRNA-uvrY4-2	This study
uvrY_sgRNA_com-5	TTCTAGCTCTAAAACTGCGCGCACCAGTTCGTGGTCTGAAACCGCTGCGG	construction of psgRNA-uvrY5-1	This study
uvrY_sgRNA_N20-5	CCGCAGCGGTTTCAGACCACGAACTGGTGCGCGCAGTTTTAGAGCTAGAA	construction of psgRNA-uvrY5-1	This study
uvrY_sgRNA_com-6	TTCTAGCTCTAAAACGAATGCGTCGTATCCCTGCGCTGAAACCGCTGCGG	construction of psgRNA-uvrY6-3	This study
uvrY_sgRNA_N20-6	CCGCAGCGGTTTCAGCGCAGGGATACGACGCATTCGTTTTAGAGCTAGAA	construction of psgRNA-uvrY6-3	This study
uvrY_sgRNA_com-7	TTCTAGCTCTAAAACTTTATATCTTCCAGAATGCGCTGAAACCGCTGCGG	construction of psgRNA-uvrY7-13	This study
uvrY_sgRNA_N20-7	CCGCAGCGGTTTCAGCGCATTCTGGAAGATATAAAGTTTTAGAGCTAGAA	construction of psgRNA-uvrY7-13	This study
uvrY_sgRNA_com-8	TTCTAGCTCTAAAACACGACTTTTATACCCTTTATCTGAAACCGCTGCGG	construction of psgRNA-uvrY8-1	This study
uvrY_sgRNA_N20-8	CCGCAGCGGTTTCAGATAAAGGGTATAAAAGTCGTGTTTTAGAGCTAGAA	construction of psgRNA-uvrY8-1	This study
uvrY_sgRNA_com-9	TTCTAGCTCTAAAACCACCGACGACTTTTATACCCCTGAAACCGCTGCGG	construction of psgRNA-uvrY9-15	This study
uvrY_sgRNA_N20-9	CCGCAGCGGTTTCAGGGGTATAAAAGTCGTCGGTGGTTTTAGAGCTAGAA	construction of psgRNA-uvrY9-15	This study
wecC_psgRNA_N20_com-01	GCTATTTCTAGCTCTAAAACATAACAGAAATGGTCGCAAACTGAAACCGCTGCGGCGATG	construction of psgRNA-wecC1	This study
wecC_psgRNA_N20-01	CATCGCCGCAGCGGTTTCAGTTTGCGACCATTTCTGTTATGTTTTAGAGCTAGAAATAGC	construction of psgRNA-wecC1	This study
wecC_psgRNA_N20-10	CATCGCCGCAGCGGTTTCAGACCCAGTCCGATAACAGAAAGTTTTAGAGCTAGAAATAGC	construction of psgRNA-wecC10-2	This study
wecC_psgRNA_N20_com-10	GCTATTTCTAGCTCTAAAACTTTCTGTTATCGGACTGGGTCTGAAACCGCTGCGGCGATG	construction of psgRNA-wecC10-2	This study
wecC_psgRNA_N20-11	CATCGCCGCAGCGGTTTCAGTTATCGGACTGGGTTATATCGTTTTAGAGCTAGAAATAGC	construction of psgRNA-wecC11-2	This study
wecC_psgRNA_N20_com-11	GCTATTTCTAGCTCTAAAACGATATAACCCAGTCCGATAACTGAAACCGCTGCGGCGATG	construction of psgRNA-wecC11-2	This study
wecC_psgRNA_N20-12	CATCGCCGCAGCGGTTTCAGTCACGGCAAAAACAGGTAATGTTTTAGAGCTAGAAATAGC	construction of psgRNA-wecC12-2	This study
wecC_psgRNA_N20_com-12	GCTATTTCTAGCTCTAAAACATTACCTGTTTTTGCCGTGACTGAAACCGCTGCGGCGATG	construction of psgRNA-wecC12-2	This study
wecC_psgRNA_N20_com-02	GCTATTTCTAGCTCTAAAACGTCCGATAACAGAAATGGTCCTGAAACCGCTGCGGCGATG	construction of psgRNA-wecC2	This study
wecC_psgRNA_N20-02	CATCGCCGCAGCGGTTTCAGGACCATTTCTGTTATCGGACGTTTTAGAGCTAGAAATAGC	construction of psgRNA-wecC2	This study
wecC_psgRNA_N20_com-03	GCTATTTCTAGCTCTAAAACATATAACCCAGTCCGATAACCTGAAACCGCTGCGGCGATG	construction of psgRNA-wecC3	This study
wecC_psgRNA_N20-03	CATCGCCGCAGCGGTTTCAGGTTATCGGACTGGGTTATATGTTTTAGAGCTAGAAATAGC	construction of psgRNA-wecC3	This study
wecC_psgRNA_N20_com-04	GCTATTTCTAGCTCTAAAACTTGGCAGCCCGATATAACCCCTGAAACCGCTGCGGCGATG	construction of psgRNA-wecC4	This study
wecC_psgRNA_N20-04	CATCGCCGCAGCGGTTTCAGGGGTTATATCGGGCTGCCAAGTTTTAGAGCTAGAAATAGC	construction of psgRNA-wecC4	This study
wecC_psgRNA_N20-05	CATCGCCGCAGCGGTTTCAGGAGGCAAACGCTGCTGCCGTGTTTTAGAGCTAGAAATAGC	construction of psgRNA-wecC5	This study
wecC_psgRNA_N20_com-05	GCTATTTCTAGCTCTAAAACACGGCAGCAGCGTTTGCCTCCTGAAACCGCTGCGGCGATG	construction of psgRNA-wecC5	This study
[truncated: 332 more rows]

## Sheet: Table S2-2
Table S2-2. The oligonucleotides used for preparation of double strand DNA as genome editor.
Name	Sequence (5'→3')	Purpose	Reference
agp_PAM2stop-35	GGATAGTTTTACTCGCTTCAAACGCTCAGGCACAATAAGTACCGGAAGGCTATCAGCTACAGCAAGTGCTCAT	Preparation of ds agp_PAM2stop	This study
agp_PAM2stop_com-35	ATGAGCACTTGCTGTAGCTGATAGCCTTCCGGTACTTATTGTGCCTGAGCGTTTGAAGCGAGTAAAACTATCC	Preparation of ds agp_PAM2stop	This study
arcA_PAM4stop	CGAGTTGGTAACACGCAACACGTTGAAAAGTATTTTCGAATAAGAAGGCTATGATGTTTTCGAAGCGACAGATGGCGCGGAAA	Preparation of ds arcA_PAM4stop	Miyake et al., 2020 (as the arcA_PAMstop)
arcA_PAM4stop_com	TTTCCGCGCCATCTGTCGCTTCGAAAACATCATAGCCTTCTTATTCGAAAATACTTTTCAACGTGTTGCGTGTTACCAACTCG	Preparation of ds arcA_PAM4stop	Miyake et al., 2020 (as the arcA_PAMstop_com)
arcB_PAM2_stop	GCTGGCGCAGTATTATGTTGACCTGATGATGAAGTTAGGTTAAGTGCGCTTCTCAATGTTGCTGGCGCTGGCCCTCGTCGTTC	Preparation of ds arcB_PAM2stop	This study
arcB_PAM2_stop_com	GAACGACGAGGGCCAGCGCCAGCAACATTGAGAAGCGCACTTAACCTAACTTCATCATCAGGTCAACATAATACTGCGCCAGC	Preparation of ds arcB_PAM2stop	This study
atoC_PAM8stop	CAACGGACGCACAGCATTACACCTGTTTGCCGATATTCACTAAGATGTGGTGTTGATGGATATCCGCATGCCAGAGATGGACG	Preparation of ds atoC_PAM8stop	This study
atoC_PAM8stop_com	CGTCCATCTCTGGCATGCGGATATCCATCAACACCACATCTTAGTGAATATCGGCAAACAGGTGTAATGCTGTGCGTCCGTTG	Preparation of ds atoC_PAM8stop	This study
atoS_PAM3_stop	GTGGATTTATCCACGCCGCTTACGCAATCAAATGATCCTGTAAGCAATCCTGATGGTCATTGTCCCAACGCTTACTATTGGTT	Preparation of ds atoS_PAM3stop	This study
atoS_PAM3_stop_com	AACCAATAGTAAGCGTTGGGACAATGACCATCAGGATTGCTTACAGGATCATTTGATTGCGTAAGCGGCGTGGATAAATCCAC	Preparation of ds atoS_PAM3stop	This study
atpD_PAM1stop-No1	CCGCGGTTTAAACAGGTTATTTCGTAGAGGATTTAAGATGTAAACTGGAAAGATTGTCCAGGTAATCGGCGCCGTAGTTGACG	Preparation of ds atpD_PAM1stop	Ogawa et al., 2020 (as the atpD_PAMstop )
atpD_PAM1stop-com-No1	CGTCAACTACGGCGCCGATTACCTGGACAATCTTTCCAGTTTACATCTTAAATCCTCTACGAAATAACCTGTTTAAACCGCGG	Preparation of ds atpD_PAM1stop	Ogawa et al., 2020 (as the atpD_PAMstop_com)
atpE_PAM2stop-No2	CCATCATCACAGCGGCAGCCATGTACAGCAGATCCATATTTTAGTTTTCCATGACAGTCTCCAGTTTGTTTCAGTTAAAACGT	Preparation of ds atpE_PAM2stop	Ogawa et al., 2020 (as the atpE_PAMstop )
atpE_PAM2stop-com-No2	ACGTTTTAACTGAAACAAACTGGAGACTGTCATGGAAAACTAAAATATGGATCTGCTGTACATGGCTGCCGCTGTGATGATGG	Preparation of ds atpE_PAM2stop	Ogawa et al., 2020 (as the atpE_PAMstop_com)
baeR_PAM1stop	AGAGAGAAGTATGACCGAGTTACCAATCGACGAAAACACATAACGTATTTTGATCGTGGAAGATGAACCGAAGCTGGGGCAGT	Preparation of ds baeR_PAM1stop	Miyake et al., 2020 (as the baeR_PAMstop)
baeR_PAM1stop_com	ACTGCCCCAGCTTCGGTTCATCTTCCACGATCAAAATACGTTATGTGTTTTCGTCGATTGGTAACTCGGTCATACTTCTCTCT	Preparation of ds baeR_PAM1stop	Miyake et al., 2020 (as the baeR_PAMstop_com)
basR_PAM2stop	CGATACGCTGTTATTGCAGGGACTGATTCTGGCGGCGCAATAAGAAGGCTACGCGTGCGATAGCGTGACAACCGCGCGGATGG	Preparation of ds baeR_PAM2stop	Miyake et al., 2020 (as the basR_PAMstop)
basR_PAM2stop_com	CCATCCGCGCGGTTGTCACGCTATCGCACGCGTAGCCTTCTTATTGCGCCGCCAGAATCAGTCCCTGCAATAACAGCGTATCG	Preparation of ds baeR_PAM2stop	Miyake et al., 2020 (as the basR_PAMstop_com)
baeS_PAM1_stop	AATGAAGTTCTGGCGACCCGGTATTACCGGCAAACTGTTTTAAGCGATTTTCGCCACCTGCATTGTCTTGCTGATCAGTATGC	Preparation of ds baeS_PAM1stop	This study
baeS_PAM1_stop_com	GCATACTGATCAGCAAGACAATGCAGGTGGCGAAAATCGCTTAAAACAGTTTGCCGGTAATACCGGGTCGCCAGAACTTCATT	Preparation of ds baeS_PAM1stop	This study
barA_PAM1_stop	GACCAACTACAGCCTGCGCGCACGCATGATGATTCTGATCTAAGCACCGACCGTCCTTATTGGTTTATTGCTGAGTATCTTTT	Preparation of ds barA_PAM1stop	This study
barA_PAM1_stop_com	AAAAGATACTCAGCAATAAACCAATAAGGACGGTCGGTGCTTAGATCAGAATCATCATGCGTGCGCGCAGGCTGTAGTTGGTC	Preparation of ds barA_PAM1stop	This study
basS_PAM1stop_F	CGGGGCCATTTTGTTGGTGTTTGAGCTGATCAGCGTCTTCTAACTATGGCATGAAAGTACCGAGCAGATTCAGCTGTTTGAGC	Preparation of ds basS_PAM1stop	This study
basS_PAM1stop_R	GCTCAAACAGCTGAATCTGCTCGGTACTTTCATGCCATAGTTAGAAGACGCTGATCAGCTCAAACACCAACAAAATGGCCCCG	Preparation of ds basS_PAM1stop	This study
cbpA_PAM2stop_F	TATGGAATTAAAGGATTATTACGCCATCATGGGCGTGAAATAAACGGACGATCTCAAGACAATCAAGACCGCCTATCGTCGAC	Preparation of ds cbpA_PAM2stop	This study
cbpA_PAM2stop_R	GTCGACGATAGGCGGTCTTGATTGTCTTGAGATCGTCCGTTTATTTCACGCCCATGATGGCGTAATAATCCTTTAATTCCATA	Preparation of ds cbpA_PAM2stop	This study
cbpM_PAM2stop_F2	TGGCTAATGTTACGGTGACTTTTACTATTACCGAATTTTGTAAGCATACCGGCATCTCTGAAGAGGAGTTGAATGAAATTGTC	Preparation of ds cbpM_PAM2stop	This study
cbpM_PAM2stop_R2	GACAATTTCATTCAACTCCTCTTCAGAGATGCCGGTATGCTTACAAAATTCGGTAATAGTAAAAGTCACCGTAACATTAGCCA	Preparation of ds cbpM_PAM2stop	This study
cheA_PAM1_stop	CGATTTTTATCAGACATTTTTTGATGAAGCGGACGAACTGTAAGCTGACATGGAGCAGCATTTGCTGGTTTTGCAGCCGGAAG	Preparation of ds cheA_PAM1stop	This study
cheA_PAM1_stop_com	CTTCCGGCTGCAAAACCAGCAAATGCTGCTCCATGTCAGCTTACAGTTCGTCCGCTTCATCAAAAAATGTCTGATAAAAATCG	Preparation of ds cheA_PAM1stop	This study
cheB_PAM1stop	ATTAACGATGAGCAAAATCAGGGTGTTATCTGTCGATGATTAAGCACTGATGCGCCAGATCATGACAGAAATCATCAACAGCC	Preparation of ds cheB_PAM1stop	This study
cheB_PAM1stop_com	GGCTGTTGATGATTTCTGTCATGATCTGGCGCATCAGTGCTTAATCATCGACAGATAACACCCTGATTTTGCTCATCGTTAAT	Preparation of ds cheB_PAM1stop	This study
cheY_PAM2stop	GGATAAAGAACTTAAATTTTTGGTTGTGGATGACTTTTCCTAAATGCGACGCATAGTGCGTAACCTGCTGAAAGAGCTGGGAT	Preparation of ds cheY_PAM2stop	This study
cheY_PAM2stop_com	ATCCCAGCTCTTTCAGCAGGTTACGCACTATGCGTCGCATTTAGGAAAAGTCATCCACAACCAAAAATTTAAGTTCTTTATCC	Preparation of ds cheY_PAM2stop	This study
citA3_PAM3stop	TTTGCTGATTCTGGTGTTCTCAATATTTGTCATTGCAGCCTAAGCGCAATATTTTACGGCCAGTTTTGAGGACTATTTAACGC	Preparation of ds citA_PAM3stop	This study
citA3_PAM3stop_com	GCGTTAAATAGTCCTCAAAACTGGCCGTAAAATATTGCGCTTAGGCTGCAATGACAAATATTGAGAACACCAGAATCAGCAAA	Preparation of ds citA_PAM3stop	This study
citB_PAM1stop	AGCTCCATTAACCCTATTGATCGTTGAGGACGAAACGCCGTAAGCAGAGATGCATGCGGAATATATTCGTCACATTCCCGGAT	Preparation of ds citB_PAM1stop	This study
citB_PAM1stop_com	ATCCGGGAATGTGACGAATATATTCCGCATGCATCTCTGCTTACGGCGTTTCGTCCTCAACGATCAATAGGGTTAATGGAGCT	Preparation of ds citB_PAM1stop	This study
clpA_PAM7stop-7	CGAGCACTTGTTACTGGCGCTGCTCAGTAACCCATCTGCCTAAGAGGCGCTGGAAGCGTGTTCTGTGGATTTGGTTGCGCTCC	Preparation of ds clpA_PAM7stop	This study
clpA_PAM7stop_com-7	GGAGCGCAACCAAATCCACAGAACACGCTTCCAGCGCCTCTTAGGCAGATGGGTTACTGAGCAGCGCCAGTAACAAGTGCTCG	Preparation of ds clpA_PAM7stop	This study
clpP_PAM2stop-2	TATGGCGCTGGTGCCGATGGTCATTGAACAGACCTCACGCTAAGAGCGCTCTTTTGATATCTATTCTCGTCTACTTAAGGAAC	Preparation of ds clpP_PAM2stop	This study
clpP_PAM2stop_com-2	GTTCCTTAAGTAGACGAGAATAGATATCAAAAGAGCGCTCTTAGCGTGAGGTCTGTTCAATGACCATCGGCACCAGCGCCATA	Preparation of ds clpP_PAM2stop	This study
clpX_PAM1stop-1	TTGCGGCAAAAGCCAGCATGAAGTGCGCAAGCTGATTGCCTAACCATCCGTGTATATCTGCGACGAATGTGTTGATTTATGTA	Preparation of ds clpX_PAM1stop	This study
clpX_PAM1stop_com-1	TACATAAATCAACACATTCGTCGCAGATATACACGGATGGTTAGGCAATCAGCTTGCGCACTTCATGCTGGCTTTTGCCGCAA	Preparation of ds clpX_PAM1stop	This study
clpX_PAM3stop-3	GGCTGAAACGCTGGCGCGCCTGCTGGATGTTCCGTTCACCTAAGCCGACGCGACTACACTGACCGAAGCCGGTTATGTGGGTG	Preparation of ds clpX_PAM3stop	This study
clpX_PAM3stop_com-3	CACCCACATAACCGGCTTCGGTCAGTGTAGTCGCGTCGGCTTAGGTGAACGGAACATCCAGCAGGCGCGCCAGCGTTTCAGCC	Preparation of ds clpX_PAM3stop	This study
cpxA_PAM1_stop	CATGATAGGCAGCTTAACCGCGCGCATCTTCGCCATCTTCTAACTGACGCTGGCGCTGGTGTTGATGTTGGTTTTGATGTTAC	Preparation of ds cpxA_PAM1stop	This study
cpxA_PAM1_stop_com	GTAACATCAAAACCAACATCAACACCAGCGCCAGCGTCAGTTAGAAGATGGCGAAGATGCGCGCGGTTAAGCTGCCTATCATG	Preparation of ds cpxA_PAM1stop	This study
cpxR_PAM1stop	TATTTAAACAATGAATAAAATCCTGTTAGTTGATGATGACTAAGAGCTGACTTCCCTATTAAAGGAGCTGCTCGAGATGGAAG	Preparation of ds cpxR_PAM1stop	Miyake et al., 2020 (as the cpxR_PAMstop)
cpxR_PAM1stop_com	CTTCCATCTCGAGCAGCTCCTTTAATAGGGAAGTCAGCTCTTAGTCATCATCAACTAACAGGATTTTATTCATTGTTTAAATA	Preparation of ds cpxR_PAM1stop	Miyake et al., 2020 (as the cpxR_PAMstop_com)
cpxR_PAM7_F	GAATAAAATCCTGTTAGTTGATGATGACCGAGAGCTGACTTAACTATTAAAGGAGCTGCTCGAGATGGAAGGCTTCAACGTGA	Preparation of ds cpxR_PAM7stop	This study
cpxR_PAM7_R	TCACGTTGAAGCCTTCCATCTCGAGCAGCTCCTTTAATAGTTAAGTCAGCTCTCGGTCATCATCAACTAACAGGATTTTATTC	Preparation of ds cpxR_PAM7stop	This study
cpxR_PAM2_D51A	CTTGATCTTCTGGACGACAGCATTGATTTACTTTTGCTTGCTGTGATGATGCCAAAAAAGAACGGTATCGACACATTAAAAGCACTTCGCCAGACACACCAGA	Preparation of ds cpxR_PAM2_D51A	This study
cpxR_PAM2_D51A_com	TCTGGTGTGTCTGGCGAAGTGCTTTTAATGTGTCGATACCGTTCTTTTTTGGCATCATCACAGCAAGCAAAAGTAAATCAATGCTGTCGTCCAGAAGATCAAG	Preparation of ds cpxR_PAM2_D51A	This study
cra_PAM2stop_F	GAAACTGGATGAAATCGCTCGGCTGGCGGGAGTGTCGCGGTAAACTGCAAGCTATGTTATTAACGGCAAAGCGAAGCAATACC	Preparation of ds cra_PAM2stop	This study
cra_PAM2stop_R	GGTATTGCTTCGCTTTGCCGTTAATAACATAGCTTGCAGTTTACCGCGACACTCCCGCCAGCCGAGCGATTTCATCCAGTTTC	Preparation of ds cra_PAM2stop	This study
creB_PAM3stop	GGTCTGGTTAGTGGAAGATGAGCAAGGGATAGCCGACACGTAAGTCTACATGTTGCAGCAGGAAGGTTTTGCCGTCGAGGTCT	Preparation of ds creB_PAM3stop	Miyake et al., 2020 (as the creB_PAMstop)
creB_PAM3stop_com	AGACCTCGACGGCAAAACCTTCCTGCTGCAACATGTAGACTTACGTGTCGGCTATCCCTTGCTCATCTTCCACTAACCAGACC	Preparation of ds creB_PAM3stop	Miyake et al., 2020 (as the creB_PAMstop_com)
creC_PAM4_stop	CTATTTTTTACTGGTGGCGGTGGCAGCCTGGTTCGTACTGTAAATTTTTGTCAAAGAAGTTAAACCGGGCGTGCGAAGAGCAA	Preparation of ds creC_PAM4stop	This study
creC_PAM4_stop_com	TTGCTCTTCGCACGCCCGGTTTAACTTCTTTGACAAAAATTTACAGTACGAACCAGGCTGCCACCGCCACCAGTAAAAAATAG	Preparation of ds creC_PAM4stop	This study
crp_PAM3stop-3	AGGATAACCGCGCATGGTGCTTGGCAAACCGCAAACAGACTAAACTCTCGAATGGTTCTTGTCTCATTGCCACATTCATAAGT	Preparation of ds crp_PAM3stop	This study
crp_PAM3stop-_com-3	ACTTATGAATGTGGCAATGAGACAAGAACCATTCGAGAGTTTAGTCTGTTTGCGGTTTGCCAAGCACCATGCGCGGTTATCCT	Preparation of ds crp_PAM3stop	This study
cueR_PAM1stop-1	TGCGCGAACGATGAACATCAGCGATGTAGCAAAAATTACCTAACTGACCAGCAAAGCCATTCGCTTCTATGAAGAGAAGGGGC	Preparation of ds cueR_PAM1stop	This study
cueR_PAM1stop_com-1	GCCCCTTCTCTTCATAGAAGCGAATGGCTTTGCTGGTCAGTTAGGTAATTTTTGCTACATCGCTGATGTTCATCGTTCGCGCA	Preparation of ds cueR_PAM1stop	This study
cusR_PAM1stop	AAATATGAAACTGTTGATTGTCGAAGATGAAAAGAAAACCTAAGAATACTTGACCAAAGGGTTAACCGAAGCCGGTTTTGTGG	Preparation of ds cusR_PAM1stop	This study
cusR_PAM1stop_com	CCACAAAACCGGCTTCGGTTAACCCTTTGGTCAAGTATTCTTAGGTTTTCTTTTCATCTTCGACAATCAACAGTTTCATATTT	Preparation of ds cusR_PAM1stop	This study
cusR_PAM2stop	TGTCGAAGATGAAAAGAAAACCGGAGAATACTTGACCAAATAATTAACCGAAGCCGGTTTTGTGGTCGATTTGGCCGACAACG	Preparation of ds cusR_PAM2stop	Miyake et al., 2020 (as the cusR_PAMstop)
cusR_PAM2stop_com	CGTTGTCGGCCAAATCGACCACAAAACCGGCTTCGGTTAATTATTTGGTCAAGTATTCTCCGGTTTTCTTTTCATCTTCGACA	Preparation of ds cusR_PAM2stop	Miyake et al., 2020 (as the cusR_PAMstop_com)
cusS_PAM3_stop	GGTCAGTAAGCCATTTCAGCGCCCGTTTTCGCTGGCAACCTAACTGACCTTTTTTATCAGCCTGGCCACCATCGCGGCGTTTT	Preparation of ds cusS_PAM3stop	This study
cusS_PAM3_stop_com	AAAACGCCGCGATGGTGGCCAGGCTGATAAAAAAGGTCAGTTAGGTTGCCAGCGAAAACGGGCGCTGAAATGGCTTACTGACC	Preparation of ds cusS_PAM3stop	This study
dcuR_PAMstop	AATGGTCGCGGAGCTGAATCGCCGATACGTAGCACAAATCTAAGGCTTTCAATGCTGTGGAACAGCCTCGACGCTGGAGAAAG	Preparation of ds dcuR_PAM2stop	This study
dcuR_PAMstop_com	CTTTCTCCAGCGTCGAGGCTGTTCCACAGCATTGAAAGCCTTAGATTTGTGCTACGTATCGGCGATTCAGCTCCGCGACCATT	Preparation of ds dcuR_PAM2stop	This study
dcuS_PAM1_stop	GATGAGACATTCATTGCCCTACCGCATGTTACGCAAACGTTAAATGAAATTGAGTACCACAGTGATCTTAATGGTCAGTGCGG	Preparation of ds dcuS_PAM1stop	This study
dcuS_PAM1_stop_com	CCGCACTGACCATTAAGATCACTGTGGTACTCAATTTCATTTAACGTTTGCGTAACATGCGGTAGGGCAATGAATGTCTCATC	Preparation of ds dcuS_PAM1stop	This study
dps_PAM4multistop	CAGCGAGAAAAAAGCAACAGTAGAGTTGCTGAATCGCCAGTAAGTAATTAATATCCAGTTTATTGATCTTTCTTTGATTACCAAACAAGCG	Preparation of ds dps_PAM4multistop	This study
dps_PAM4multistop_com	CGCTTGTTTGGTAATCAAAGAAAGATCAATAAACTGGATATTAATTACTTACTGGCGATTCAGCAACTCTACTGTTGCTTTTTTCTCGCTG	Preparation of ds dps_PAM4multistop	This study
envZ_PAM1stop	AAGCATGAGGCGATTGCGCTTCTCGCCACGAAGTTCATTTTAACGTACGTTATTGCTCATCGTCACCTTGCTGTTCGCCAGCC	Preparation of ds envZ_PAM1stop	Miyake et al., 2020 (as the envZ_PAMstop)
envZ_PAM1stop_com	GGCTGGCGAACAGCAAGGTGACGATGAGCAATAACGTACGTTAAAATGAACTTCGTGGCGAGAAGCGCAATCGCCTCATGCTT	Preparation of ds envZ_PAM1stop	Miyake et al., 2020 (as the envZ_PAMstop_com)
evgA_PAM1stop	AATCTTAGCAGAGTTGACTGAAGGCGGAAGTGCCGTTCAGTAAGTGGAAACACTTAAGCCTGATATCGTCATCATTGATGTCG	Preparation of ds evgA_PAM1stop	This study
evgA_PAM1stop_com	CGACATCAATGATGACGATATCAGGCTTAAGTGTTTCCACTTACTGAACGGCACTTCCGCCTTCAGTCAACTCTGCTAAGATT	Preparation of ds evgA_PAM1stop	This study
evgS_PAM1_stop	TTTACCCTATATTTTTCTTCTCTGTTGTGGTCTTTGGTCGTAAATAAGTTTCGCAGACGAAGATTACATCGAATATCGTGGCA	Preparation of ds evgS_PAM1stop	This study
evgS_PAM1_stop_com	TGCCACGATATTCGATGTAATCTTCGTCTGCGAAACTTATTTACGACCAAAGACCACAACAGAGAAGAAAAATATAGGGTAAA	Preparation of ds evgS_PAM1stop	This study
fecI_PAM1stop-1	CGCCACTACCACAGCTTCCTTAACGTTCGAGTCGCTTTATTAAACACATCACGGCTGGTTGAAAAGCTGGCTGACGCGCAAAC	Preparation of ds fecI_PAM1stop	This study
fecI_PAM1stop_com-1	GTTTGCGCGTCAGCCAGCTTTTCAACCAGCCGTGATGTGTTTAATAAAGCGACTCGAACGTTAAGGAAGCTGTGGTAGTGGCG	Preparation of ds fecI_PAM1stop	This study
fecI_PAM4stop_F	ATTAACTTTTGATGCACTCCGCATGTCTGACCGCGCCACTTAAACAGCTTCCTTAACGTTCGAGTCGCTTTATGGCACACATC	Preparation of ds fecI_PAM4stop	This study
fecI_PAM4stop_R	GATGTGTGCCATAAAGCGACTCGAACGTTAAGGAAGCTGTTTAAGTGGCGCGGTCAGACATGCGGAGTGCATCAAAAGTTAAT	Preparation of ds fecI_PAM4stop	This study
fimZ_PAM1stop	AACTATGAAACCAACGTCGGTGATCATTATGGATACTCATTAAATCATCAGAATGTCTATTGAAGTTCTGTTGCAAAAAAACA	Preparation of ds fimZ_PAM1stop	Ogawa et al., 2020 (as the fimZ_PAMstop )
fimZ_PAM1stop_com	TGTTTTTTTGCAACAGAACTTCAATAGACATTCTGATGATTTAATGAGTATCCATAATGATCACCGACGTTGGTTTCATAGTT	Preparation of ds fimZ_PAM1stop	Ogawa et al., 2020 (as the fimZ_PAMstop_com)
fis_PAM2multistop	CGCGTAAATTCTGACGTACTGACCGTTTCTACCGTTAACTTAAATAATTAAGTAACCCAAAAACCCCTGCGTGACTCGGTTAAACAGGCAC	Preparation of ds fis_PAM2multistop	This study
fis_PAM2multistop_com	GTGCCTGTTTAACCGAGTCACGCAGGGGTTTTTGGGTTACTTAATTATTTAAGTTAACGGTAGAAACGGTCAGTACGTCAGAATTTACGCG	Preparation of ds fis_PAM2multistop	This study
frmA_PAM2stop-35	GAGAGATGAAATCACGTGCTGCCGTTGCATTTGCTTAAGGTAAACCGCTGGAAATCGTTGAAATTGACGTTGC	Preparation of ds frmA_PAM2stop	This study
frmA_PAM2stop_com-35	GCAACGTCAATTTCAACGATTTCCAGCGGTTTACCTTAAGCAAATGCAACGGCAGCACGTGATTTCATCTCTC	Preparation of ds frmA_PAM2stop	This study
fucR_PAM1stop-1	GATAGTCGACCTGCTGCTGAACCATACCAGCCTGACCACGTAAGCTCTCTCTGAACAGCTAAAGGTCAGTAAAGAAACCATTC	Preparation of ds fucR_PAM1stop	This study
fucR_PAM1stop_com-1	GAATGGTTTCTTTACTGACCTTTAGCTGTTCAGAGAGAGCTTACGTGGTCAGGCTGGTATGGTTCAGCAGCAGGTCGACTATC	Preparation of ds fucR_PAM1stop	This study
fur_PAM1stop_F	CCGCATGACTGATAACAATACCGCCCTAAAGAAAGCTGGCTAAAAAGTAACGCTTCCTCGTTTAAAAATCCTGGAAGTTCTTC	Preparation of ds fur_PAM1stop	This study
fur_PAM1stop_R	GGCGTACTGACTATTGTTATGGCGGGATTTCTTTCGACCGATTTTTCATTGCGAAGGAGCAAATTTTTAGGACCTTCAAGAAG	Preparation of ds fur_PAM1stop	This study
gadX_PAM6stop-6	GTAATGAAGAAACTTTTTTATGTGCATGAAGATTTAATGCTTACTCCTTGAGCATCGGGAGAAATAATGAAAGCGTGTCCCTT	Preparation of ds gadX_PAM6stop	This study
gadX_PAM6stop_com-6	AAGGGACACGCTTTCATTATTTCTCCCGATGCTCAAGGAGTAAGCATTAAATCTTCATGCACATAAAAAAGTTTCTTCATTAC	Preparation of ds gadX_PAM6stop	This study
glrK_PAM2_stop	CTGGCCCGTTTTTCCCCGCTCATTACGACAACTGGTAATGTAAGCATTTTTGCTGATTCTGCTGCCCCTGTTGGTGCTGGCAT	Preparation of ds glrK_PAM2stop	This study
glrK_PAM2_stop_com	ATGCCAGCACCAACAGGGGCAGCAGAATCAGCAAAAATGCTTACATTACCAGTTGTCGTAATGAGCGGGGAAAAACGGGCCAG	Preparation of ds glrK_PAM2stop	This study
glrR_PAM1stop	GAGCCATAAACCTGCGCATTTATTATTGGTCGATGACGATTAAGGATTGCTGAAACTGCTTGGCCTGCGCCTGACCAGCGAAG	Preparation of ds glrR_PAM1stop	This study
glrR_PAM1stop_com	CTTCGCTGGTCAGGCGCAGGCCAAGCAGTTTCAGCAATCCTTAATCGTCATCGACCAATAATAAATGCGCAGGTTTATGGCTC	Preparation of ds glrR_PAM1stop	This study
hisG_PAM3stop-35	ACACTCGTTTACGCATAGCTATGCAGAAATCCGGCTAATTAAGTGATGACTCACGCGAATTGCTGGCGCGCTG	Preparation of ds hisG_PAM3stop	This study
hisG_PAM3stop_com-35	CAGCGCGCCAGCAATTCGCGTGAGTCATCACTTAATTAGCCGGATTTCTGCATAGCTATGCGTAAACGAGTGT	Preparation of ds hisG_PAM3stop	This study
hisI_PAM3stop-35	CAGAACAACAACGTCGCGAACTGGACTGGGAAAAATAAGACGGACTTATGCCGGTGATTGTGCAACACGCGGT	Preparation of ds hisI_PAM3stop	This study
hisI_PAM3stop_com-35	ACCGCGTGTTGCACAATCACCGGCATAAGTCCGTCTTATTTTTCCCAGTCCAGTTCGCGACGTTGTTGTTCTG	Preparation of ds hisI_PAM3stop	This study
hns_PAM1multistop	ATGAGCGAAGCACTTAAAATTCTGAACAACATCCGTACTCTAAGTAAGTAAGCAAGAGAATGTACACTTGAAACGCTGGAAGAAATGCTGG	Preparation of ds hns_PAM1multistop	This study
hns_PAM1multistop_com	CCAGCATTTCTTCCAGCGTTTCAAGTGTACATTCTCTTGCTTACTTACTTAGAGTACGGATGTTGTTCAGAATTTTAAGTGCTTCGCTCAT	Preparation of ds hns_PAM1multistop	This study
hslU_PAM1stop-1	ACGCGAAATCGTCAGCGAACTGGATAAGCACATCATCGGCTAAGACAACGCCAAGCGTTCTGTGGCGATTGCTCTGCGTAACC	Preparation of ds hslU_PAM1stop	This study
hslU_PAM1stop_com-1	GGTTACGCAGAGCAATCGCCACAGAACGCTTGGCGTTGTCTTAGCCGATGATGTGCTTATCCAGTTCGCTGACGATTTCGCGT	Preparation of ds hslU_PAM1stop	This study
hslU_PAM2stop-2	CGTCCAGGCTATCGAGAAAAACCGTTATCGCGCTGAAGAATAAGCAGAAGAACGTATTCTCGACGTGCTGATCCCACCTGCTA	Preparation of ds hslU_PAM2stop	This study
hslU_PAM2stop_com-2	TAGCAGGTGGGATCAGCACGTCGAGAATACGTTCTTCTGCTTATTCTTCAGCGCGATAACGGTTTTTCTCGATAGCCTGGACG	Preparation of ds hslU_PAM2stop	This study
hslV_PAM5stop-5	CGGTGACGTGGTGCAGCCAGAAAACGATCTTATTGCTATCTAATCCGGCGGCCCTTACGCCCAGGCTGCGGCGCGCGCGCTGT	Preparation of ds hslV_PAM5stop	This study
hslV_PAM5stop_com-5	ACAGCGCGCGCGCCGCAGCCTGGGCGTAAGGGCCGCCGGATTAGATAGCAATAAGATCGTTTTCTGGCTGCACCACGTCACCG	Preparation of ds hslV_PAM5stop	This study
hupA_PAM3multistop	TGATTGATGTAATTGCAGAGAAAGCAGAACTGTCCAAAACTAAGTAAATAACTGCTCTGGAGTCCACTCTGGCTGCAATTACTGAGTCTCT	Preparation of ds hupA_PAM3multistop	This study
hupA_PAM3multistop_com	AGAGACTCAGTAATTGCAGCCAGAGTGGACTCCAGAGCAGTTATTTACTTAGTTTTGGACAGTTCTGCTTTCTCTGCAATTACATCAATCA	Preparation of ds hupA_PAM3multistop	This study
hupB_PAM1multistop	TCTAACGCACGGCCAGCCGCAGCTTTAGAGATATCAGCCCTTACTTAATTATTGTCGATCAATTGAGATTTATTCACTCTTCTCTTCCTCT	Preparation of ds hupB_PAM1multistop	This study
hupB_PAM1multistop_com	AGAGGAAGAGAAGAGTGAATAAATCTCAATTGATCGACAATAATTAAGTAAGGGCTGATATCTCTAAAGCTGCGGCTGGCCGTGCGTTAGA	Preparation of ds hupB_PAM1multistop	This study
ihfB_PAM1multistop	GAGGAATCATGACCAAGTCAGAATTGATAGAAAGACTTGCTAACTAACTAACGCACATTCCCGCCAAGACGGTTGAAGATGCAGTAAAAGA	Preparation of ds ihfB_PAM1multistop	This study
ihfB_PAM1multistop_com	TCTTTTACTGCATCTTCAACCGTCTTGGCGGGAATGTGCGTTAGTTAGTTAGCAAGTCTTTCTATCAATTCTGACTTGGTCATGATTCCTC	Preparation of ds ihfB_PAM1multistop	This study
kdpD_PAM1_stop	GATGAATAACGAACCCTTACGTCCCGACCCCGATCGTCTGTAAGAACAAACTGCCGCGCCGCATCGGGGGAAGCTGAAAGTTT	Preparation of ds kdpD_PAM1stop	This study
kdpD_PAM1_stop_com	AAACTTTCAGCTTCCCCCGATGCGGCGCGGCAGTTTGTTCTTACAGACGATCGGGGTCGGGACGTAAGGGTTCGTTATTCATC	Preparation of ds kdpD_PAM1stop	This study
kdpE_PAM1stop	GATTGTTGAAGATGAACAGGCTATTCGTCGCTTTCTGCGCTAAGCGCTGGAGGGCGACGGGATGCGCGTCTTTGAGGCCGAAA	Preparation of ds kdpE_PAM1stop	Miyake et al., 2020 (as the kdpE_PAMstop_com)
kdpE_PAM1stop_com	TTTCGGCCTCAAAGACGCGCATCCCGTCGCCCTCCAGCGCTTAGCGCAGAAAGCGACGAATAGCCTGTTCATCTTCAACAATC	Preparation of ds kdpE_PAM1stop	Miyake et al., 2020 (as the kdpE_PAMstop_com)
lacI_PAM7stop_F	CGATGTCGCAGAGTATGCCGGTGTCTCTTATCAGACCGTTTAACGCGTGGTGAACCAGGCCAGCCACGTTTCTGCGAAAACGC	Preparation of ds lacI_PAM7stop	This study
lacI_PAM7stop_R	GCGTTTTCGCAGAAACGTGGCTGGCCTGGTTCACCACGCGTTAAACGGTCTGATAAGAGACACCGGCATACTCTGCGACATCG	Preparation of ds lacI_PAM7stop	This study
marA_PAM2stop_F	TATTACCATTCATAGCATTTTGGACTGGATCGAGGACAACTAAGAATCGCCACTGTCACTGGAGAAAGTGTCAGAGCGTTCGG	Preparation of ds marA_PAM2stop	This study
marA_PAM2stop_R	CCGAACGCTCTGACACTTTCTCCAGTGACAGTGGCGATTCTTAGTTGTCCTCGATCCAGTCCAAAATGCTATGAATGGTAATA	Preparation of ds marA_PAM2stop	This study
narL_PAM2stop	TAATCAGGAACCGGCTACTATCCTGCTGATTGACGATCACTAAATGCTGCGAACTGGCGTAAAACAGCTTATCAGTATGGCAC	Preparation of ds narL_PAM2stop	This study
narL_PAM2stop_com	GTGCCATACTGATAAGCTGTTTTACGCCAGTTCGCAGCATTTAGTGATCGTCAATCAGCAGGATAGTAGCCGGTTCCTGATTA	Preparation of ds narL_PAM2stop	This study
narP_PAM9stop	GTTACTGGAGCTTGATCCTGGCTCTGAAGTGGTCGCCGAATAAGGCGACGGCGCGAGCGCTATCGATCTGGCGAATAGACTGG	Preparation of ds narP_PAM9stop	This study
narP_PAM9stop_com	CCAGTCTATTCGCCAGATCGATAGCGCTCGCGCCGTCGCCTTATTCGGCGACCACTTCAGAGCCAGGATCAAGCTCCAGTAAC	Preparation of ds narP_PAM9stop	This study
narQ_PAM2_stop	GCGTGTGATTGTTAAACGACCCGTCTCGGCCAGTCTGGCCTAAGCCTTTTTTTACATTGTGCTGCTGTCGATTCTTTCCACGG	Preparation of ds narQ_PAM2stop	This study
narQ_PAM2_stop_com	CCGTGGAAAGAATCGACAGCAGCACAATGTAAAAAAAGGCTTAGGCCAGACTGGCCGAGACGGGTCGTTTAACAATCACACGC	Preparation of ds narQ_PAM2stop	This study
narX_PAM1_stop	CATGCTTAAACGTTGTCTCTCTCCGCTCACCCTGGTTAATTAAGTTGCGCTTATTGTGTTGCTTTCTACTGCTATTGGACTGG	Preparation of ds narX_PAM1stop	This study
narX_PAM1_stop_com	CCAGTCCAATAGCAGTAGAAAGCAACACAATAAGCGCAACTTAATTAACCAGGGTGAGCGGAGAGAGACAACGTTTAAGCATG	Preparation of ds narX_PAM1stop	This study
nikA_PAM2stop_F	TCTATTTTAATCCATTGGGGTTACCATGCTCTCCACACTCTAACGCACTCTATTTGCGCTGCTGGCTTGTGCGTCTTTTATCG	Preparation of ds nikA_PAM2stop	This study
nikA_PAM2stop_R	CGATAAAAGACGCACAAGCCAGCAGCGCAAATAGAGTGCGTTAGAGTGTGGAGAGCATGGTAACCCCAATGGATTAAAATAGA	Preparation of ds nikA_PAM2stop	This study
nikR_PAM1stop-1	ACGAGTCACCATCACGCTTGATGACGATTTACTGGAGACGTAAGACAGCCTGAGCCAGCGTCGTGGTTATAACAACCGTTCCG	Preparation of ds nikR_PAM1stop	This study
nikR_PAM1stop_com-1	CGGAACGGTTGTTATAACCACGACGCTGGCTCAGGCTGTCTTACGTCTCCAGTAAATCGTCATCAAGCGTGATGGTGACTCGT	Preparation of ds nikR_PAM1stop	This study
ntrB_PAM2_stop	CAACTCGCTGATTAACAGTATTTTGTTAATCGATGACAACTAAGCGATCCATTACGCCAACCCTGCCGCGCAACAACTGCTCG	Preparation of ds ntrB_PAM2stop	This study
ntrB_PAM2_stop_com	CGAGCAGTTGTTGCGCGGCAGGGTTGGCGTAATGGATCGCTTAGTTGTCATCGATTAACAAAATACTGTTAATCAGCGAGTTG	Preparation of ds ntrB_PAM2stop	This study
ntrC_PAM2stop	CGATAGTTCCATCCGTTGGGTGCTTGAACGTGCGCTCGCTTAAGCAGGTTTAACCTGTACGACGTTTGAGAACGGCGCAGAAG	Preparation of ds ntrC_PAM2stop	This study
ntrC_PAM2stop_com	CTTCTGCGCCGTTCTCAAACGTCGTACAGGTTAAACCTGCTTAAGCGAGCGCACGTTCAAGCACCCAACGGATGGAACTATCG	Preparation of ds ntrC_PAM2stop	This study
ntrC_PAM4_D54A-86	CGCTGGCGAGCAAAACGCCGGATGTGCTGCTTTCAGCGATCCGTATGCCAGGAATGGACGGGCTGGCGCTGCTCAAGCAGATTAAA	Preparation of ds ntrC_PAM4_D54A	This study
ntrC_PAM4_D54A_com-86	TTTAATCTGCTTGAGCAGCGCCAGCCCGTCCATTCCTGGCATACGGATCGCTGAAAGCAGCACATCCGGCGTTTTGCTCGCCAGCG	Preparation of ds ntrC_PAM4_D54A	This study
ompR_PAM5stop	AGAGAACTACAAGATTCTGGTGGTCGATGACGACATGCGCTAACGTGCGCTGCTGGAACGTTATCTCACCGAACAAGGCTTCC	Preparation of ds ompR_PAM5stop	Miyake et al., 2020 (as the ompR_PAMstop)
ompR_PAM5stop_com	GGAAGCCTTGTTCGGTGAGATAACGTTCCAGCAGCGCACGTTAGCGCATGTCGTCATCGACCACCAGAATCTTGTAGTTCTCT	Preparation of ds ompR_PAM5stop	Miyake et al., 2020 (as the ompR_PAMstop_com)
pfkB_PAM1stop-35	AAATGATGGTACGTATCTATACGTTGACACTTGCGTAATCTCTCGATAGCGCAACAATTACCCCGCAAATTTA	Preparation of ds pfkB_PAM1stop	This study
pfkB_PAM1stop_com-35	TAAATTTGCGGGGTAATTGTTGCGCTATCGAGAGATTACGCAAGTGTCAACGTATAGATACGTACCATCATTT	Preparation of ds pfkB_PAM1stop	This study
phoB_PAM1stop	CGAAATGGTCTGCTTCGTGCTCGAACAAAATGGCTTTCAGTAAGTCGAAGCGGAAGATTATGACAGTGCTGTGAATCAACTGA	Preparation of ds phoB_PAM1stop	Miyake et al., 2020 (as the phoB_PAMstop)
phoB_PAM1stop_com	TCAGTTGATTCACAGCACTGTCATAATCTTCCGCTTCGACTTACTGAAAGCCATTTTGTTCGAGCACGAAGCAGACCATTTCG	Preparation of ds phoB_PAM1stop	Miyake et al., 2020 (as the phoB_PAMstop_com)
phoB_PAM9-83	AATCAACTGAATGAACCCTGGCCGGATTTAATTTTGTTGGACTGGATGTTGCCTGGCGGCTCCGGTATCCAGTTCATCAAACA	Preparation of ds phoB_PAM9	This study
phoB_PAM9_com-83	TGTTTGATGAACTGGATACCGGAGCCGCCAGGCAACATCCAGTCCAACAAAATTAAATCCGGCCAGGGTTCATTCAGTTGATT	Preparation of ds phoB_PAM9	This study
phoB_PAM9_D53A-83	AATCAACTGAATGAACCCTGGCCGGATTTAATTTTGTTGGCATGGATGTTGCCTGGCGGCTCCGGTATCCAGTTCATCAAACA	Preparation of ds phoB_PAM9_D53A	This study
phoB_PAM9_D53A_com-83	TGTTTGATGAACTGGATACCGGAGCCGCCAGGCAACATCCATGCCAACAAAATTAAATCCGGCCAGGGTTCATTCAGTTGATT	Preparation of ds phoB_PAM9_D53A	This study
phoP_PAM1stop	TCTCAATGAACATATACCGGATATTGCGATTGTCGATCTCTAATTGCCAGACGAGGACGGTCTGTCACTGATTCGCCGCTGGC	Preparation of ds phoP_PAM1stop	Miyake et al., 2020 (as the phoP_PAMstop)
phoP_PAM1stop_com	GCCAGCGGCGAATCAGTGACAGACCGTCCTCGTCTGGCAATTAGAGATCGACAATCGCAATATCCGGTATATGTTCATTGAGA	Preparation of ds phoP_PAM1stop	Miyake et al., 2020 (as the phoP_PAMstop_com)
phoQ_PAM2stop_F	GCTGATCGGTTATAGCGTCAGTTTCGATAAAACTACGTTTTAACTGTTACGTGGCGAGAGCAATCTGTTCTATACCCTTGCGA	Preparation of ds phoQ_PAM2stop	Miyake et al., 2020 (as the phoQ_PAMstop)
phoQ_PAM2stop_R	TCGCAAGGGTATAGAACAGATTGCTCTCGCCACGTAACAGTTAAAACGTAGTTTTATCGAAACTGACGCTATAACCGATCAGC	Preparation of ds phoQ_PAM2stop	Miyake et al., 2020 (as the phoQ_PAMstop_com)
phoR_PAM2stop_F	GTCGTGGAAAAGGCTGGTGCTGGAGCTGCTACTTTGCTGCTAACCGGCTTTCATCCTGGGTGCATTTTTTGGTTACCTGCCCT	Preparation of ds phoR_PAM2stop	Miyake et al., 2020 (as the phoR_PAMstop)
phoR_PAM2stop_R	AGGGCAGGTAACCAAAAAATGCACCCAGGATGAAAGCCGGTTAGCAGCAAAGTAGCAGCTCCAGCACCAGCCTTTTCCACGAC	Preparation of ds phoR_PAM2stop	Miyake et al., 2020 (as the phoR_PAMstop_com)
pta_PAM1stop-35	GAGGATAAACCGTGTCCCGTATTATTATGCTGATCTAAACCGGAACCAGCGTCGGTCTGACCAGCGTCAGCCT	Preparation of ds pta_PAM1stop	This study
pta_PAM1stop_com-35	AGGCTGACGCTGGTCAGACCGACGCTGGTTCCGGTTTAGATCAGCATAATAATACGGGACACGGTTTATCCTC	Preparation of ds pta_PAM1stop	This study
qseB_PAM1stop	CCTTAGTAAAATGGGTTTTAGCGTCGACTGGTTTACACAATAACGTCAGGGAAAAGAGGCGCTTTATAGCGCACCTTATGATG	Preparation of ds qseB_PAM1stop	This study
qseB_PAM1stop_com	CATCATAAGGTGCGCTATAAAGCGCCTCTTTTCCCTGACGTTATTGTGTAAACCAGTCGACGCTAAAACCCATTTTACTAAGG	Preparation of ds qseB_PAM1stop	This study
qseC_PAM2stop_F	AATTCTGGCCTCGGTGACCTGGCTGCTTTCCAGCTTTGTCTAATGGAAACAAACAACGGATAACGTCGATGAATTGTTCGACA	Preparation of ds qseC_PAM2stop	This study
qseC_PAM2stop_R	TGTCGAACAATTCATCGACGTTATCCGTTGTTTGTTTCCATTAGACAAAGCTGGAAAGCAGCCAGGTCACCGAGGCCAGAATT	Preparation of ds qseC_PAM2stop	This study
rcnA_PAM2stop_F	CATGACCGAATTTACAACTCTTCTTCAGCAAGGAAACGCCTAATTCTTCATCCCCAGCGCCATCTTACTTGGTGCGCTTCATG	Preparation of ds rcnA_PAM2stop	This study
rcnA_PAM2stop_R	CATGAAGCGCACCAAGTAAGATGGCGCTGGGGATGAAGAAATTGGCGTTTCCTTGCTGAAGAAGAGTTGTAAATTCGGTCATG	Preparation of ds rcnA_PAM2stop	This study
rcnR_PAM4stop_F	ATATTCTTGTTAACCAGGTGTTGCCATGTCTCATACAATCTAAGATAAACAGAAACTGAAAGCGCGTGCCAGTAAGATTCAGG	Preparation of ds rcnR_PAM4stop	This study
rcnR_PAM4stop_R	CCTGAATCTTACTGGCACGCGCTTTCAGTTTCTGTTTATCTTAGATTGTATGAGACATGGCAACACCTGGTTAACAAGAATAT	Preparation of ds rcnR_PAM4stop	This study
rcsB_PAM3stop	TTACATGAACAATATGAACGTAATTATTGCCGATGACCATTAAATAGTCTTGTTCGGTATTCGCAAATCACTTGAGCAAATTG	Preparation of ds rcsB_PAM3stop	This study
rcsB_PAM3stop_com	CAATTTGCTCAAGTGATTTGCGAATACCGAACAAGACTATTTAATGGTCATCGGCAATAATTACGTTCATATTGTTCATGTAA	Preparation of ds rcsB_PAM3stop	This study
rcsC_PAM1_stop	GAGCTTCGCCCCTTTGAAATACCTTGCTTCTTTTCGTACATAACTGAAAGCCTCGCGCTACATGTTCAGAGCATTGGCGTTAG	Preparation of ds rcsC_PAM1stop	This study
rcsC_PAM1_stop_com	CTAACGCCAATGCTCTGAACATGTAGCGCGAGGCTTTCAGTTATGTACGAAAAGAAGCAAGGTATTTCAAAGGGGCGAAGCTC	Preparation of ds rcsC_PAM1stop	This study
rcsD_PAM7_stop	GAGCATTACCCGCTTCTTTTTACTGTTGATCATTGTGTTATAAGTGACGATGGGTGTAATGGTACAAAGCGCCGTTAACGCCT	Preparation of ds rcsD_PAM7stop	This study
rcsD_PAM7_stop_com	AGGCGTTAACGGCGCTTTGTACCATTACACCCATCGTCACTTATAACACAATGATCAACAGTAAAAAGAAGCGGGTAATGCTC	Preparation of ds rcsD_PAM7stop	This study
rob_PAM2stop_F	CGGCATTATTCGCGACCTTTTAATCTGGCTGGAAGGTCATTAAGATCAGCCCCTGTCGCTCGACAATGTAGCGGCGAAAGCAG	Preparation of ds rob_PAM2stop	This study
rob_PAM2stop_R	CTGCTTTCGCCGCTACATTGTCGAGCGACAGGGGCTGATCTTAATGACCTTCCAGCCAGATTAAAAGGTCGCGAATAATGCCG	Preparation of ds rob_PAM2stop	This study
rpoF_PAM1stop-1	ACTCTATACCGCTGAAGGTGTAATGGATAAACACTCGCTGTAACAGCGTTATGTCCCGCTGGTGCGTCACGAAGCATTGCGCC	Preparation of ds rpoF_PAM1stop	This study
rpoF_PAM1stop_com-1	GGCGCAATGCTTCGTGACGCACCAGCGGGACATAACGCTGTTACAGCGAGTGTTTATCCATTACACCTTCAGCGGTATAGAGT	Preparation of ds rpoF_PAM1stop	This study
rpoF_PAM2stop_F	AGGTGTAATGGATAAACACTCGCTGTGGCAGCGTTATGTCTAACTGGTGCGTCACGAAGCATTGCGCCTGCAGGTTCGACTGC	Preparation of ds rpoF_PAM2stop	This study
rpoF_PAM2stop_R	GCAGTCGAACCTGCAGGCGCAATGCTTCGTGACGCACCAGTTAGACATAACGCTGCCACAGCGAGTGTTTATCCATTACACCT	Preparation of ds rpoF_PAM2stop	This study
rpoH_PAM1stop-1	TTTAGCTTTAGCCCCAGTTGGCAACCTGGATTCCTACATCTAAGCAGCTAACGCGTGGCCGATGTTGTCGGCTGACGAGGAGC	Preparation of ds rpoH_PAM1stop	This study
rpoH_PAM1stop_com-1	GCTCCTCGTCAGCCGACAACATCGGCCACGCGTTAGCTGCTTAGATGTAGGAATCCAGGTTGCCAACTGGGGCTAAAGCTAAA	Preparation of ds rpoH_PAM1stop	This study
rpoH_PAM4stop_F	AATGACTGACAAAATGCAAAGTTTAGCTTTAGCCCCAGTTTAAAACCTGGATTCCTACATCCGGGCAGCTAACGCGTGGCCGA	Preparation of ds rpoH_PAM4stop	This study
rpoH_PAM4stop_R	TCGGCCACGCGTTAGCTGCCCGGATGTAGGAATCCAGGTTTTAAACTGGGGCTAAAGCTAAACTTTGCATTTTGTCAGTCATT	Preparation of ds rpoH_PAM4stop	This study
rpoN_PAM1stop-1	CAGGCTTAGCCAACAACTGGCGATGACGCCACAGCTCCAATAAGCAATTCGTCTGTTGCAGTTGTCGACGCTGGAACTTCAGC	Preparation of ds rpoN_PAM1stop	This study
rpoN_PAM1stop_com-1	GCTGAAGTTCCAGCGTCGACAACTGCAACAGACGAATTGCTTATTGGAGCTGTGGCGTCATCGCCAGTTGTTGGCTAAGCCTG	Preparation of ds rpoN_PAM1stop	This study
rpoN_PAM7stop_F	AGGTTTGCAACTCAGGCTTAGCCAACAACTGGCGATGACGTAACAGCTCCAACAGGCAATTCGTCTGTTGCAGTTGTCGACGC	Preparation of ds rpoN_PAM7stop	This study
rpoN_PAM7stop_R	GCGTCGACAACTGCAACAGACGAATTGCCTGTTGGAGCTGTTACGTCATCGCCAGTTGTTGGCTAAGCCTGAGTTGCAAACCT	Preparation of ds rpoN_PAM7stop	This study
rpoS_PAM3stop-3	CGAAGAGGAACTGTTATCGCAGGGAGCCACACAGCGTGTGTAAGACGCGACTCAGCTTTACCTTGGTGAGATTGGTTATTCAC	Preparation of ds rpoS_PAM3stop	This study
rpoS_PAM3stop_com-3	GTGAATAACCAATCTCACCAAGGTAAAGCTGAGTCGCGTCTTACACACGCTGTGTGGCTCCCTGCGATAACAGTTCCTCTTCG	Preparation of ds rpoS_PAM3stop	This study
rpoS_PAM5stop_F	TGATTTAAATGAAGATGCGGAATTTGATGAGAACGGAGTTTAAGTTTTTGACGAAAAGGCCTTAGTAGAACAGGAACCCAGTG	Preparation of ds rpoS_PAM5stop	This study
rpoS_PAM5stop_R	CACTGGGTTCCTGTTCTACTAAGGCCTTTTCGTCAAAAACTTAAACTCCGTTCTCATCAAATTCCGCATCTTCATTTAAATCA	Preparation of ds rpoS_PAM5stop	This study
rssB_PAM2stop	TGTTGAAGATGAGCAGGTATTTCGCTCGCTTCTGGATTCATAATTTTCCTCATTGGGAGCGACAACGGTACTGGCGGCTGATG	Preparation of ds rssB_PAM2stop	This study
rssB_PAM2stop_com	CATCAGCCGCCAGTACCGTTGTCGCTCCCAATGAGGAAAATTATGAATCCAGAAGCGAGCGAAATACCTGCTCATCTTCAACA	Preparation of ds rssB_PAM2stop	This study
rstA_PAM3stop_F	CAAGGACGGCATGACCATTTGTCGTGATTTACGCGCAAAGTAATCTGGACCGATTGTTCTTCTAACCTCTCTCGATAGCGATA	Preparation of ds rstA_PAM3stop	This study
rstA_PAM3stop_R	TATCGCTATCGAGAGAGGTTAGAAGAACAATCGGTCCAGATTACTTTGCGCGTAAATCACGACAAATGGTCATGCCGTCCTTG	Preparation of ds rstA_PAM3stop	This study
rstA_PAM7stop	GGAAGATGATGCGGAAGTCGGTTCACTGATTGCCGCGTACTAAGCAAAACATGATATGCAGGTTACCGTAGAGCCGCGCGGCG	Preparation of ds rstA_PAM7stop	Miyake et al., 2020 (as the rstA_PAMstop)
rstA_PAM7stop_com	CGCCGCGCGGCTCTACGGTAACCTGCATATCATGTTTTGCTTAGTACGCGGCAATCAGTGAACCGACTTCCGCATCATCTTCC	Preparation of ds rstA_PAM7stop	Miyake et al., 2020 (as the rstA_PAMstop_com)
rstB_PAM5_stop	TTACCTGTTATTGTTTGTCTGCTTCCTTGTGATGTCTCTGTAAGTTGGGCTGGTGTACAAATTTACCGCCGAACGCGCGGGCA	Preparation of ds rstB_PAM5stop	This study
rstB_PAM5_stop_com	TGCCCGCGCGTTCGGCGGTAAATTTGTACACCAGCCCAACTTACAGAGACATCACAAGGAAGCAGACAAACAATAACAGGTAA	Preparation of ds rstB_PAM5stop	This study
soxS_PAM1stop_F	TATTCAGGATCTTATCGCATGGATTGACGAGCATATTGACTAACCGCTTAACATTGATGTAGTCGCAAAAAAATCAGGCTATT	Preparation of ds soxS_PAM1stop	This study
soxS_PAM1stop_R	AATAGCCTGATTTTTTTGCGACTACATCAATGTTAAGCGGTTAGTCAATATGCTCGTCAATCCATGCGATAAGATCCTGAATA	Preparation of ds soxS_PAM1stop	This study
stpA_PAM2multistop	TTATGTCCGTAATGTTACAAAGTTTAAATAACATTCGCACTAACTAAGTAATGGCTCGCGAATTCTCCATTGACGTTCTTGAAGAAATGCT	Preparation of ds stpA_PAM2multistop	This study
stpA_PAM2multistop_com	AGCATTTCTTCAAGAACGTCAATGGAGAATTCGCGAGCCATTACTTAGTTAGTGCGAATGTTATTTAAACTTTGTAACATTACGGACATAA	Preparation of ds stpA_PAM2multistop	This study
torR_PAM3stop	CCCTCTGATGCCACATCACATTGTTATTGTTGAAGATGAGTAAGTTACCCAGGCGCGATTACAATCCTACTTCACTCAGGAGG	Preparation of ds torR_PAM3stop	Miyake et al., 2020 (as the torR_PAMstop)
torR_PAM3stop_com	CCTCCTGAGTGAAGTAGGATTGTAATCGCGCCTGGGTAACTTACTCATCTTCAACAATAACAATGTGATGTGGCATCAGAGGG	Preparation of ds torR_PAM3stop	Miyake et al., 2020 (as the torR_PAMstop_com)
torS_PAM3_stop	GAATTTAACCCTGACCCGAAGACTCTGGATGGGCTTTGCCTAAATGGCGCTGTTAACCCTGACCAGTACCCTGGTGGGATGGT	Preparation of ds torS_PAM3stop	This study
torS_PAM3_stop_com	ACCATCCCACCAGGGTACTGGTCAGGGTTAACAGCGCCATTTAGGCAAAGCCCATCCAGAGTCTTCGGGTCAGGGTTAAATTC	Preparation of ds torS_PAM3stop	This study
uhpA_PAM1stop	CACCGTTGCCCTTATAGACGATCACCTCATCGTCCGCTCCTAATTTGCGCAGCTGCTGGGGCTGGAACCTGATTTGCAGGTAG	Preparation of ds uhpA_PAM1stop	This study
uhpA_PAM1stop_com	CTACCTGCAAATCAGGTTCCAGCCCCAGCAGCTGCGCAAATTAGGAGCGGACGATGAGGTGATCGTCTATAAGGGCAACGGTG	Preparation of ds uhpA_PAM1stop	This study
uvrY_PAM8stop	ACGACGCATTCTGGAAGATATAAAGGGTATAAAAGTCGTCTAAGAGGCATCGTGCGGTGAAGACGCCGTTAAGTGGTGCCGGA	Preparation of ds uhpA_PAM1stop	This study
uvrY_PAM8stop_com	TCCGGCACCACTTAACGGCGTCTTCACCGCACGATGCCTCTTAGACGACTTTTATACCCTTTATATCTTCCAGAATGCGTCGT	Preparation of ds uhpA_PAM1stop	This study
uhpB_PAM1stop_F	CCGCTTAATTACCGTTATTGCCTGCTTTTTTATCTTCTCTTAAGCATGGTTTTGCCTGTGGAGTATCAGCCTGCATCTGGTTG	Preparation of ds uhpB_PAM1stop	This study
uhpB_PAM1stop_R	CAACCAGATGCAGGCTGATACTCCACAGGCAAAACCATGCTTAAGAGAAGATAAAAAAGCAGGCAATAACGGTAATTAAGCGG	Preparation of ds uhpB_PAM1stop	This study
ybaQ_PAM6stop-6-2	CAGTGCACTGATCAATAACAATCGTAAACTCACTACTGAGTAAGCATTTCGTCTGGCGAAAGTTTTTGATACCACAGTCGATTT	Preparation of ds ybaQ_PAM6stop	This study
ybaQ_PAM6stop_com-6-2	AAATCGACTGTGGTATCAAAAACTTTCGCCAGACGAAATGCTTACTCAGTAGTGAGTTTACGATTGTTATTGATCAGTGCACTG	Preparation of ds ybaQ_PAM6stop	This study
ybiJ_PAM2stop-2	TACTGTTGTTGCTGCTATGGCTCTTTCAACTCTGTCATTTTAAGTGTTCGCGGCGGAACCGGTAACGGCATCCCAGGCACAGA	Preparation of ds ybiJ_PAM2stop	This study
ybiJ_PAM2stop_comp-2	TCTGTGCCTGGGATGCCGTTACCGGTTCCGCCGCGAACACTTAAAATGACAGAGTTGAAAGAGCCATAGCAGCAACAACAGTA	Preparation of ds ybiJ_PAM2stop	This study
ydfH_PAM7stop_7	GCAGATTTATCGTATTCTTCGTCGCGACATTGTCCATTGCTAAATTGCTCCAGGCACACCGTTGTCGGAAAAAGAAGTTTCTG	Preparation of ds ydfH_PAM7stop	This study
ydfH_PAM7stop_7_com	CAGAAACTTCTTTTTCCGACAACGGTGTGCCTGGAGCAATTTAGCAATGGACAATGTCGCGACGAAGAATACGATAAATCTGC	Preparation of ds ydfH_PAM7stop	This study
yedV_PAM2_stop	CCGTTTAACCTTGCTTTTTATATTGCTACTGTCTGTTGCTTAAGCCGGAATTGTCTGGACTCTCTATAATGGCCTGGCAAGTG	Preparation of ds yedV_PAM2stop	This study
yedV_PAM2_stop_com	CACTTGCCAGGCCATTATAGAGAGTCCAGACAATTCCGGCTTAAGCAACAGACAGTAGCAATATAAAAAGCAAGGTTAAACGG	Preparation of ds yedV_PAM2stop	This study
yedW_PAM17stop_F	GCTTTATCTTGCGCTGAAGGATGATTATGCATTGATCATTTAAGATATTATGCTTCCGGGTATGGATGGCTGGCAGATCTTAC	Preparation of ds yedW_PAM17stop	This study
yedW_PAM17stop_R	GTAAGATCTGCCAGCCATCCATACCCGGAAGCATAATATCTTAAATGATCAATGCATAATCATCCTTCAGCGCAAGATAAAGC	Preparation of ds yedW_PAM17stop	This study
yedW_PAM1stop	TTTCATGAAGATTCTACTTATTGAAGATAATCAAAGGACCTAAGAATGGGTAACGCAGGGGCTTTCCGAAGCGGGTTATGTCA	Preparation of ds yedW_PAM1stop	Miyake et al., 2020 (as the hprR_PAMstop)
yedW_PAM1stop_com	TGACATAACCCGCTTCGGAAAGCCCCTGCGTTACCCATTCTTAGGTCCTTTGATTATCTTCAATAAGTAGAATCTTCATGAAA	Preparation of ds yedW_PAM1stop	Miyake et al., 2020 (as the hprR_PAMstop_com)
yehT_PAM3_stop	GGGACGAGGCATGATTAAAGTCTTAATTGTCGATGATGAATAATTAGCACGGGAGAACCTGCGTGTATTTTTGCAGGAGCAGA	Preparation of ds yehT_PAM3stop	This study
yehT_PAM3_stop_com	TCTGCTCCTGCAAAAATACACGCAGGTTCTCCCGTGCTAATTATTCATCATCGACAATTAAGACTTTAATCATGCCTCGTCCC	Preparation of ds yehT_PAM3stop	This study
yehU_PAM2_stop	ATGGTTAATGAGTAAAACGCCATTATTCATACCGTTAATGTAAGTCACGGTTCGTCTGCCGCATAAATTTCTCTGCTACATCG	Preparation of ds yehU_PAM2stop	This study
yehU_PAM2_stop_com	CGATGTAGCAGAGAAATTTATGCGGCAGACGAACCGTGACTTACATTAACGGTATGAATAATGGCGTTTTACTCATTAACCAT	Preparation of ds yehU_PAM2stop	This study
ygeK_PAM3stop	ATATATGGGAAAAATTAAAATTGTAGTTTCAGATCAGCAGTAATTTATGATTGATGGGATAATTGGATTTCTCGGACATTATC	Preparation of ds ygeK_PAM3stop	This study
ygeK_PAM3stop_com	GATAATGTCCGAGAAATCCAATTATCCCATCAATCATAAATTACTGCTGATCTGAAACTACAATTTTAATTTTTCCCATATAT	Preparation of ds ygeK_PAM3stop	This study
yhjB_PAM2stop	TATTCATGGAATGAAAATCAGTTTACAGCAGCGTATTCCATAAGTGAGTATTCAGGGGGCCAGTCAGGCAGACGAGTTATGGC	Preparation of ds yhjB_PAM2stop	This study
yhjB_PAM2stop_com	GCCATAACTCGTCTGCCTGACTGGCCCCCTGAATACTCACTTATGGAATACGCTGCTGTAAACTGATTTTCATTCCATGAATA	Preparation of ds yhjB_PAM2stop	This study
yjiY_PAM2_stop	TTTTACTATGGATACTAAAAAGATATTCAAGCACATACCCTAAGTGATTCTCGGAATCATCGGTGCATTCTGCCTCGCGGTAG	Preparation of ds yjiY_PAM2stop	This study
yjiY_PAM2_stop_com	CTACCGCGAGGCAGAATGCACCGATGATTCCGAGAATCACTTAGGGTATGTGCTTGAATATCTTTTTAGTATCCATAGTAAAA	Preparation of ds yjiY_PAM2stop	This study
ylaC_PAM3stop_3_F	ACCACGAAGGCAAACGATGACCGAAATACAACGCCTGCTGTAAGAAACGATTGAGTCTCTGAATACCCGCGAAAAACGCGACA	Preparation of ds ylaC_PAM3stop	This study
ylaC_PAM3stop_3_R	TGTCGCGTTTTTCGCGGGTATTCAGAGACTCAATCGTTTCTTACAGCAGGCGTTGTATTTCGGTCATCGTTTGCCTTCGTGGT	Preparation of ds ylaC_PAM3stop	This study
ynfU_PAM1stop-1	GGAAAAGCCTATGTCAGAACGTAAAAACTCAAAATCACGCTAAAATTATCTCGTTAAATGTTCCTGCCCAAACTGCACCCAAG	Preparation of ds ynfU_PAM1stop	This study
ynfU_PAM1stop_comp-1	CTTGGGTGCAGTTTGGGCAGGAACATTTAACGAGATAATTTTAGCGTGATTTTGAGTTTTTACGTTCTGACATAGGCTTTTCC	Preparation of ds ynfU_PAM1stop	This study
ypdA_PAM3_stop	GCTGGCGGTCTTCGATCGGGCAGCGTTAATGCTTATCTGCTAATTCTTTCTCATCCGTATCCGCCTGTTTCGCGAACTGTTGC	Preparation of ds ypdA_PAM3stop	This study
ypdA_PAM3_stop_com	GCAACAGTTCGCGAAACAGGCGGATACGGATGAGAAAGAATTAGCAGATAAGCATTAACGCTGCCCGATCGAAGACCGCCAGC	Preparation of ds ypdA_PAM3stop	This study
ypdB_PAM6_stop	GGCACAACAGGAACTGAGCTGGCTAATTAAAGAGCACAGCTAAATGGAGATTGTCGGCACCTTTGACGACGGTCTGGACGTGT	Preparation of ds ypdB_PAM6stop	This study
ypdB_PAM6_stop_com	ACACGTCCAGACCGTCGTCAAAGGTGCCGACAATCTCCATTTAGCTGTGCTCTTTAATTAGCCAGCTCAGTTCCTGTTGTGCC	Preparation of ds ypdB_PAM6stop	This study
zntA_PAM4stop_F	AACTTAACCGGAGGATGCCATGTCGACTCCTGACAATCACTAAAAGAAAGCCCCTCAATTTGCTGCGTTCAAACCGCTAACCA	Preparation of ds zntA_PAM4stop	This study
zntA_PAM4stop_R	TGGTTAGCGGTTTGAACGCAGCAAATTGAGGGGCTTTCTTTTACTGATTGTCAGGAGTCGACATGGCATCCTCCGGTTAAGTT	Preparation of ds zntA_PAM4stop	This study
zraR_PAM1stop	CGATAATATCGATATTCTGGTGGTGGATGATGACATTAGCTAATGCACTATTTTGCAGGCTTTACTGCGCGGCTGGGGCTATA	Preparation of ds zraR_PAM1stop	This study
zraR_PAM1stop_com	TATAGCCCCAGCCGCGCAGTAAAGCCTGCAAAATAGTGCATTAGCTAATGTCATCATCCACCACCAGAATATCGATATTATCG	Preparation of ds zraR_PAM1stop	This study
zraS_PAM3_stop	TAAAGACTCCTTAGCTAAATGGTTAAGCGCGATCCTCCCCTAAGTCATTGTTGGGCTGGTGGGATTGTTTGCGGTAACTGTGA	Preparation of ds zraS_PAM1stop	This study
zraS_PAM3_stop_com	TCACAGTTACCGCAAACAATCCCACCAGCCCAACAATGACTTAGGGGAGGATCGCGCTTAACCATTTAGCTAAGGAGTCTTTA	Preparation of ds zraS_PAM1stop	This study

## Sheet: Table S2-3
Table S2-3. The oligonucleotides for other purposes in this study
Name	Sequence (5'→3')	Purpose	Reference
agp_check_F	ATGGCAAAGGCATATGCTAAAAACC	Amplification of the mutated DNA region in agp gene of E. coli genome	This study
agp_check_R	GGTGATCACCGGGTTAAAGGTTGGG	Amplification of the mutated DNA region in agp gene of E. coli genome	This study
arcA_check_R	AGGAACATCAACGCAACATTCGCCT	Amplification of the mutated DNA region in arcA gene of E. coli genome	Miyake et al, 2020
arcA_K421T	CCATCGAGATCTTTGCCCGCGCCGCTGCCC	Amplification of the mutated DNA region in arcA gene of E. coli genome	Miyake et al, 2020
arcB_check_R	AGACGTTGTCGTGACTCCTCCAGTT	Amplification of the mutated DNA region in arcB gene of E. coli genome	This study
arcB_K293T	GTGTGAGATCTCGCCCGGACTGCGTGCCGG	Amplification of the mutated DNA region in arcB gene of E. coli genome	This study
atoC_check_R	ACGATTAAATTCAACTCATCGAGAT	Amplification of the mutated DNA region in atoC gene of E. coli genome	This study
atoC_K213S	GCATTTAGATCTTTATTGATGCGTTCATGC	Amplification of the mutated DNA region in atoC gene of E. coli genome	This study
atoS_check_R	GCAAGTTCTGCATTTAATGCGCGGA	Amplification of the mutated DNA region in atoS gene of E. coli genome	This study
atoS_K213S	GCATTTAGATCTTTATTGATGCGTTCATGC	Amplification of the mutated DNA region in atoS gene of E. coli genome	This study
atpD_check-F	AACGTCTGGCGGCTTGCCTTAGGGC	Amplification of the mutated DNA region in atpD gene of E. coli genome	This study
atpD_check-R	ATTACCATTTTGCACCTCAAGAGCA	Amplification of the mutated DNA region in atpD gene of E. coli genome	This study
atpE_chack-F	AAAGAACTGAGTACGCAGCAGAGGA	Amplification of the mutated DNA region in atpE gene of E. coli genome	This study
atpE_chack-R	TTCCGTCTGCGGACGTGAACGTAAC	Amplification of the mutated DNA region in atpE gene of E. coli genome	This study
baeR_check_R	CGACGAATTTCCCGGCACAGCGTCA	Amplification of the mutated DNA region in baeR gene of E. coli genome	Miyake et al, 2020
baeR_K190S	TGGGCAGATCTGCGCAAGACTTCAACCAGC	Amplification of the mutated DNA region in baeR gene of E. coli genome	Miyake et al, 2020
baeS_check_R	ATCTGAAAGACAAAGCGATCATTGT	Amplification of the mutated DNA region in baeS gene of E. coli genome	This study
baeS_K189S-2	GTGCTAGATCTGCTGCACGCCAGAAATAAC	Amplification of the mutated DNA region in baeS gene of E. coli genome	This study
barA_check_R	ATATCGGAATGGCGACGATGCAGTA	Amplification of the mutated DNA region in barA gene of E. coli genome	This study
barA_K262S	ATCTGCAGATCTTAGCGGTGCGGTATGGCG	Amplification of the mutated DNA region in barA gene of E. coli genome	This study
basR_check_R	GCGATTTTGTCGGTCAGCGTATCGC	Amplification of the mutated DNA region in basR gene of E. coli genome	Miyake et al, 2020
basR_K389T	AGGCGAGATCTATATCATTCAGCGAGCGGG	Amplification of the mutated DNA region in basR gene of E. coli genome	Miyake et al, 2020
basS_check_R	TGCAGCTCCGCCAGCGGGCGGGTGA	Amplification of the mutated DNA region in basS gene of E. coli genome	This study
basS_K439T	GGGACTAGATCTGGCGGCGCAAACCGAAGG	Amplification of the mutated DNA region in basS gene of E. coli genome	This study
btsR_check_R	ACAATATACGGGCGATGTTCCGGGT	Amplification of the mutated DNA region in btsR gene of E. coli genome	This study
btsR_K430T	CGGCGCAGATCTTTGCCGGGCAATATGAGC	Amplification of the mutated DNA region in btsR gene of E. coli genome	This study
btsS_check_R	ATCGAATATCGATGTAAGCCGCCGG	Amplification of the mutated DNA region in btsS gene of E. coli genome	This study
btsS_YEHU_LL_F	TCGTCTTCACCTCGACACTTCACCAATTGTGTAAA	Amplification of the mutated DNA region in btsS gene of E. coli genome	This study
btsS_K193T	CGTCGAAGATCTCCAGCAGCGCCTGGAGAG	Amplification of the mutated DNA region in btsS gene of E. coli genome	This study
cbpA_N172S	GAAGATCTTTTATATCGTTCCAGGCCTGTTTC	Amplification of the mutated DNA region in cbpA gene of E. coli genome	This study
cbpA_PAMstop_R	AACTGACGGTTAAATTGCGGATCGT	Amplification of the mutated DNA region in cbpA gene of E. coli genome	This study
cbpM_LUX_F	TCGTCTTCACCTCGAACCTTTAAAATCTGTGATAGACTCT	Amplification of the mutated DNA region in cbpM gene of E. coli genome	This study
cbpM_PAMstop_R	TCCATTAACGTCAGCGCCACCGCGA	Amplification of the mutated DNA region in cbpM gene of E. coli genome	This study
cheA_check_R	ATGTCGGTGTTGAGTTGCATCTCAC	Amplification of the mutated DNA region in cheA gene of E. coli genome	This study
cheA_K174T	GGCGGAGATCTCATTTCTAATAGTGAAAGC	Amplification of the mutated DNA region in cheA gene of E. coli genome	This study
cheB_check_R	ACGGGCATTGGACGCAAACGCATTA	Amplification of the mutated DNA region in cheB gene of E. coli genome	This study
cheB_K173T	CCGACTAGATCTTCGTTTGCGTTCGCTGGG	Amplification of the mutated DNA region in cheB gene of E. coli genome	This study
cheY_check_R	ACTGGCAATGCCGACATCGCGCCAT	Amplification of the mutated DNA region in cheY gene of E. coli genome	This study
cheY_K428T	GTACGGCAGATCTGGCGAGCCTTGCAGCAC	Amplification of the mutated DNA region in cheY gene of E. coli genome	This study
citA_check_R	GCGATGGTCGCCAGCCGTTTGTAGT	Amplification of the mutated DNA region in citA gene of E. coli genome	This study
citA_K062S	AGATGAGATCTGTGCCGCTCATAGGCGAGG	Amplification of the mutated DNA region in citA gene of E. coli genome	This study
citB_check_R	AACACCACGTCGCCGGGATAATGCG	Amplification of the mutated DNA region in citB gene of E. coli genome	This study
citB_DPIB_LL_F	TCGTCTTCACCTCGACGCTCAAATCATTTTCATGC	Amplification of the mutated DNA region in citB gene of E. coli genome	This study
clpA_check_F	CTGAATGCAGGCATAAAAATTGGG	Amplification of the mutated DNA region in clpA gene of E. coli genome	This study
clpA_check_R	GATAACATCAATGGCTTTATCCGG	Amplification of the mutated DNA region in clpA gene of E. coli genome	This study
clpP_check_F	ACACAGGGACTAGCTGATAATCCG	Amplification of the mutated DNA region in clpP gene of E. coli genome	This study
clpP_check_R	ATAGACATCCCGGCAGTGATCACC	Amplification of the mutated DNA region in clpP gene of E. coli genome	This study
clpX_check_F	ATGGCATTTGCGTCGTCGTGTGCG	Amplification of the mutated DNA region in clpX gene of E. coli genome	This study
clpX_check_R	TGGACATCGTAGTCGCATTTCTGC	Amplification of the mutated DNA region in clpX gene of E. coli genome	This study
cpxA_check_R	GGCGGTGCCCACTTATCAATCGCCC	Amplification of the mutated DNA region in cpxA gene of E. coli genome	This study
cpxA_K437T	ATGACCGAGATCTGACTTCCCTATTAAAGG	Amplification of the mutated DNA region in cpxA gene of E. coli genome	This study
cpxR_check_R	GCATCAACTTCCAGTGTCGGTGAAC	Amplification of the mutated DNA region in cpxR gene of E. coli genome	Miyake et al, 2020
cpxR_K365T	CCCACAGATCTTGGGGGAAGACAGGGATGG	Amplification of the mutated DNA region in cpxR gene of E. coli genome	Miyake et al, 2020
cra_LUX_F	TCGTCTTCACCTCGATACACAAACTGGTCGATGTCTTGCG	Amplification of the mutated DNA region in cra gene of E. coli genome	This study
cra_check_R	TAGTTAGCGATGCGGGTATAGCTGG	Amplification of the mutated DNA region in cra gene of E. coli genome	This study
creB_check_R	TCACTTCGGGCCGTCAGGAACAGTA	Amplification of the mutated DNA region in creB gene of E. coli genome	Miyake et al, 2020
creB_K420S	GCACCAGATCTCAGGTAATTGGATAATAGC	Amplification of the mutated DNA region in creB gene of E. coli genome	Miyake et al, 2020
creC_check_R	TTGCGCACTTTGTTAATGCCACCGA	Amplification of the mutated DNA region in creC gene of E. coli genome	This study
creC_K441S	GGGAAAAGATCTGGTTAGTGGAAGATGAGC	Amplification of the mutated DNA region in creC gene of E. coli genome	This study
crp_pBAD_F_1	TTGGGCTAGCGAATTAGGAGGAATTCACCATGGTGCTTGGCAAACCGCA	Amplification of the mutated DNA region in crp gene of E. coli genome	This study
crp_check_R	AACAGGCCCAGTTCGCCAATAAAAT	Amplification of the mutated DNA region in crp gene of E. coli genome	This study
cueR_check_F	TGTGGTGGCGGTCGATATTCGCACT	Amplification of the mutated DNA region in cueR gene of E. coli genome	This study
cueR_check_R	CTCGTCTTAATCACCCTGCCCGATG	Amplification of the mutated DNA region in cueR gene of E. coli genome	This study
cusR_check_R	GCGGTAAGCAACAGAATCGGCATCC	Amplification of the mutated DNA region in cusR gene of E. coli genome	Miyake et al, 2020
cusR_K052T	GCGCATAGATCTGTTGCTGATTGAAATAGC	Amplification of the mutated DNA region in cusR gene of E. coli genome	Miyake et al, 2020
cusS_check_R	CCACTGACGATATCTTCCAGCGTCA	Amplification of the mutated DNA region in cusS gene of E. coli genome	This study
cusS_K423T	CCGGAGAGATCTTGACCAAAGGGTTAACCG	Amplification of the mutated DNA region in cusS gene of E. coli genome	This study
dcuR_check_R	TCACTTTTGCAACGCGCGTTATGCA	Amplification of the mutated DNA region in dcuR gene of E. coli genome	This study
dcuR_K440T	GACTCGAAGATCTGGTCAACTATGCTGACG	Amplification of the mutated DNA region in dcuR gene of E. coli genome	This study
dcuS_check_R	CCACTCTCCTGCGGTTTTTTCTGCA	Amplification of the mutated DNA region in dcuS gene of E. coli genome	This study
dcuS_K392T	CCCATAGATCTCGAATATCATCATACTCCC	Amplification of the mutated DNA region in dcuS gene of E. coli genome	This study
dps-Lux-F	TCGTCTTCACCTCGAGCCGTTTCCGGGATGATTTTCCTCG	Amplification of the mutated DNA region in dps gene of E. coli genome	This study
dps-middle-primer	CAGCGGGTAACTTTTCAGCGGGGTT	Amplification of the mutated DNA region in dps gene of E. coli genome	This study
envZ_check_R	ATCTCCCGACGGAAAGCGGGAGGCA	Amplification of the mutated DNA region in envZ gene of E. coli genome	Miyake et al, 2020
envZ_K434T	TGCAAGAGATCTACAAGATTCTGGTGGTCG	Amplification of the mutated DNA region in envZ gene of E. coli genome	Miyake et al, 2020
evgA_check_R	TTCATGCCTTCTTTTTTACTCACGA	Amplification of the mutated DNA region in evgA gene of E. coli genome	This study
evgA_K227S	GAGTGAGATCTTGGCATCAGTTTTATCCAG	Amplification of the mutated DNA region in evgA gene of E. coli genome	This study
evgS_check_R	GCATTAATACCACGAACCCGTTGCT	Amplification of the mutated DNA region in evgS gene of E. coli genome	This study
evgS_K431S	CTTAGCAGATCTGACTGAAGGCGGAAGTGC	Amplification of the mutated DNA region in evgS gene of E. coli genome	This study
fecI_check_F	GTTAAAAATGTCTATTGGAAACAA	Amplification of the mutated DNA region in fecI gene of E. coli genome	This study
fecI_check_R	GAGTTGGCTTTCGCGTTCCTCAGG	Amplification of the mutated DNA region in fecI gene of E. coli genome	This study
fecI_check_F2	CATCCTTTAGGGCAGTGAGGATGTC	Amplification of the mutated DNA region in fecI gene of E. coli genome	This study
fimZ_check_R	ACTTTCACTGTGCTCTGGATTTGTT	Amplification of the mutated DNA region in fimZ gene of E. coli genome	This study
fimZ_K049T	GTGATAGATCTGGCAAGCATCACAAATGGG	Amplification of the mutated DNA region in fimZ gene of E. coli genome	This study
fis-F	GGCTCTGACCATTCATGGCCGTACA	Amplification of the mutated DNA region in fis gene of E. coli genome	This study
fis-R	TTCTCATGGTCACTCCCTTTGTGAC	Amplification of the mutated DNA region in fis gene of E. coli genome	This study
frmA_check_F	AGGTGCGAAATGCCCAGTACTCCGG	Amplification of the mutated DNA region in frmA gene of E. coli genome	This study
frmA_check_R	CGGGTGGTGCCGTCTGGCATCAGGC	Amplification of the mutated DNA region in frmA gene of E. coli genome	This study
fucR_check_F	ACACCGTAATCTCATACCGGTACGC	Amplification of the mutated DNA region in fucR gene of E. coli genome	This study
fucR_check_R	GATCGCATTGGAGTCCCACAGTGCG	Amplification of the mutated DNA region in fucR gene of E. coli genome	This study
fur_LUX_F	TCTCTTCACCTCGATTTCCCCCGAAGTCACCAAGATCAT	Amplification of the mutated DNA region in fur gene of E. coli genome	This study
fur_check_R	AATACGGATTTACCGCCTTCAAAAT	Amplification of the mutated DNA region in fur gene of E. coli genome	This study
gadX_check_F	GCAATAATATATTGGCTGTCTATTC	Amplification of the mutated DNA region in gadX gene of E. coli genome	This study
gadX_check_R	CAGATAACAACGCAAAGATTAATGC	Amplification of the mutated DNA region in gadX gene of E. coli genome	This study
glrK_check_R	GCCAGGGTTGGGTCGTCCAGCACGC	Amplification of the mutated DNA region in glrK gene of E. coli genome	This study
glrK_K245T-2	GGAACGAGATCTCCGTACTGTCAGCAACTC	Amplification of the mutated DNA region in glrK gene of E. coli genome	This study
glrR_check_R	ATAATTACCGGCATTCCCGGCTGCA	Amplification of the mutated DNA region in glrR gene of E. coli genome	This study
glrR_K244T	GCGACAGATCTTTCAACGATTATTGCCCCG	Amplification of the mutated DNA region in glrR gene of E. coli genome	This study
hisG_check_F	AGCCCCCTCCTTTCCCCGCTCATTC	Amplification of the mutated DNA region in hisG gene of E. coli genome	This study
hisG_check_R	ATCCGCCAGTCCGGCACGCGGGGCG	Amplification of the mutated DNA region in hisG gene of E. coli genome	This study
hisI_check_F	ACGCGGTGCCGGAGAAATCGTCCTC	Amplification of the mutated DNA region in hisI gene of E. coli genome	This study
hisI_check_R	TCATGTACCGTTGCTGCCAGCGCGG	Amplification of the mutated DNA region in hisI gene of E. coli genome	This study
hns-LuX-F	TCGTCTTCACCTCGAGGTAAATGACTGCTGGTAACTATTC	Amplification of the mutated DNA region in hns gene of E. coli genome	This study
hns-middle	TTATTGCTTGATCAGGAAATCGTCG	Amplification of the mutated DNA region in hns gene of E. coli genome	This study
hprR_check_R	CTTGCAGTAAGGCAAATAACAGGGG	Amplification of the mutated DNA region in hprR gene of E. coli genome	Miyake et al, 2020
hprR_K182T	TACATAGATCTGCATTAACTGCCACGATAG	Amplification of the mutated DNA region in hprR gene of E. coli genome	Miyake et al, 2020
hprR_check_F	GCTGGTTCAAAATGTGCACGCTAAG	Amplification of the mutated DNA region in hprR gene of E. coli genome	This study
hprR_check_R2	CCGTTCTGGGTATAATTTCGCCAGC	Amplification of the mutated DNA region in hprR gene of E. coli genome	This study
hprS_check_R	TTATTGATGCTATCACCATGAATAA	Amplification of the mutated DNA region in hprS gene of E. coli genome	This study
hprS_K429T	GCTGGCAGATCTTACAAACGTTAAGAACAG	Amplification of the mutated DNA region in hprS gene of E. coli genome	This study
hslU_check_R	TCACGCAGTTTTTTGCGGAATGCC	Amplification of the mutated DNA region in hslU gene of E. coli genome	This study
hslUV_check_F	ATTATGCCCCGTACTTTTGTACGG	Amplification of the mutated DNA region in hslUV genes of E. coli genome	This study
hslV_check_R	AGCAATTTCACGGGCGCTAAGTTC	Amplification of the mutated DNA region in hslV gene of E. coli genome	This study
hupA-Lux-F	TCGTCTTCACCTCGATCCGGCAATCGATGCCTGCGTGGCG	Amplification of the mutated DNA region in hupA gene of E. coli genome	This study
hupA-middle	GAAGCAGAGCGCCAGCCAGCATCAA	Amplification of the mutated DNA region in hupA gene of E. coli genome	This study
hupB-Lux-F	TCGTCTTCACCTCGACGCCGAAAGATGGTCCGAGTGCCGG	Amplification of the mutated DNA region in hupB gene of E. coli genome	This study
hupB-middle	AAGGCACATCAGTAGATGCGCCCTT	Amplification of the mutated DNA region in hupB gene of E. coli genome	This study
ihfB-Lux-F	TCGTCTTCACCTCGAACGGCGTTGAAGGTTACCTGCGTGC	Amplification of the mutated DNA region in ihfB gene of E. coli genome	This study
ihfB-middle	GAGGCAGCTTCCAGTTCCAGATTAG	Amplification of the mutated DNA region in ihfB gene of E. coli genome	This study
kdpD_check_R	TTTAACGGCAGAACAGCCAGCCCTT	Amplification of the mutated DNA region in kdpD gene of E. coli genome	This study
kdpD_K068T	GCGTGAGATCTAAACCGCTTACCGCTTCTG	Amplification of the mutated DNA region in kdpD gene of E. coli genome	This study
kdpE_check_R	TCGCTCTCTTCGCTGCGTGCGGAAA	Amplification of the mutated DNA region in kdpE gene of E. coli genome	Miyake et al, 2020
kdpE_K425S	TCAGGCAGAGATCTTAACGCTCGATCTGGC	Amplification of the mutated DNA region in kdpE gene of E. coli genome	Miyake et al, 2020
lacI_check_F	CAACGGGTAGCAAAACAGATCGAAG	Amplification of the mutated DNA region in lacI gene of E. coli genome	This study
lacI_check_R	CCAGCGGATAGTTAATGATCAGCCC	Amplification of the mutated DNA region in lacI gene of E. coli genome	This study
marA_H349S	GAAGATCTGGGCAATATTATCCCCTGCAACTAATT	Amplification of the mutated DNA region in marA gene of E. coli genome	This study
marA_check_R	TGCGACTCGAAGCCATATCGTTCTG	Amplification of the mutated DNA region in marA gene of E. coli genome	This study
narL_check_R	ATGCGCCCTGAGAGGGACTTTTCGC	Amplification of the mutated DNA region in narL gene of E. coli genome	This study
narL_K427T	CGTAACGAAGATCTTGCATCCTGGGCGCAG	Amplification of the mutated DNA region in narL gene of E. coli genome	This study
narP_check_R	CGAATATGTACTTTTACTGTCTGCT	Amplification of the mutated DNA region in narP gene of E. coli genome	This study
narP_K204S	CGCGCCAGATCTCAGGTTGTACCAATGCTG	Amplification of the mutated DNA region in narP gene of E. coli genome	This study
narQ_check_R	GAATGCAGTGCCTGCTGAAATAACT	Amplification of the mutated DNA region in narQ gene of E. coli genome	This study
narQ_K238S	CACGGTAGATCTTCCTGACGCGCGGTGCGC	Amplification of the mutated DNA region in narQ gene of E. coli genome	This study
narX_check_R	GCCGTTTGTTCCATCTCTTTAATTA	Amplification of the mutated DNA region in natX gene of E. coli genome	This study
narX_K114T	GCCAGAGATCTGGAATAATCAGAATACCGG	Amplification of the mutated DNA region in natX gene of E. coli genome	This study
nikA_LUX_F100	TCGTCTTCACCTCGACGACTGCCCATCTATTGATCCAGAA	Amplification of the mutated DNA region in nikA gene of E. coli genome	This study
nikA_check_R	CCAGCCACGGGATCACCGAA	Amplification of the mutated DNA region in nikA gene of E. coli genome	This study
nikR_check_R	GACGGAGAGGTCGTGGTGATGATGC	Amplification of the mutated DNA region in nikR gene of E. coli genome	This study
nikR_NIKR-F1	GTTTAGGATCCATGCAACGAGTCACCATCA	Amplification of the mutated DNA region in nikR gene of E. coli genome	This study
ntrB_check_R	ACAGAAAGGATATGCGAGCGCCCGT	Amplification of the mutated DNA region in ntrB gene of E. coli genome	This study
ntrB_K360T	GTTTCCCAGATCTGGCAGCTAACCCGTACC	Amplification of the mutated DNA region in ntrB gene of E. coli genome	This study
ntrC_check_R	CTGACGGCAGCATCCAGATCGGAAT	Amplification of the mutated DNA region in ntrC gene of E. coli genome	This study
ntrC_K360T	GTTTCCCAGATCTGGCAGCTAACCCGTACC	Amplification of the mutated DNA region in ntrC gene of E. coli genome	This study
ntrC_check_F	TACCCGATGGTCAGCGGCCGCGAAG	Amplification of the mutated DNA region in ntrC gene of E. coli genome	This study
ompR_check_R	GTCACCATAATGATCGGCATCGGGT	Amplification of the mutated DNA region in ompR gene of E. coli genome	Miyake et al, 2020
ompR_K306T	CAGCCAGATCTAGGAGGTTAAGACTCTTCC	Amplification of the mutated DNA region in ompR gene of E. coli genome	Miyake et al, 2020
pfkB_check_F	CGGAATCATCGGCAGCTGCATTCAG	Amplification of the mutated DNA region in pfkB gene of E. coli genome	This study
pfkB_check_R	CAGAACTTGCTCTTCAAGCTGGCGA	Amplification of the mutated DNA region in pfkB gene of E. coli genome	This study
phoB_check_R	TTTCAAGGCCGCGCACGCGATCTTC	Amplification of the mutated DNA region in phoB gene of E. coli genome	Miyake et al, 2020
phoB_K030S	GAGGCAAGATCTGCGGCGCATGTCCGGCGC	Amplification of the mutated DNA region in phoB gene of E. coli genome	Miyake et al, 2020
phoB_check_F2	TAACCTGAAGATATGTGCGACGAGC	Amplification of the mutated DNA region in phoB gene of E. coli genome	This study
phoB_check_R2	CGGGTCGAGACTTAATCCCTGCATC	Amplification of the mutated DNA region in phoB gene of E. coli genome	This study
phoP_check_R	CTATTACGCCGCATTAATGCCTGCA	Amplification of the mutated DNA region in phoP gene of E. coli genome	Miyake et al, 2020
phoP_LL_F	TCGTCTTCACCTCGAAAGCAGTTTATCGATGGTCT	Amplification of the mutated DNA region in phoP gene of E. coli genome	Miyake et al, 2020
phoQ_check_R	TTCGATTTCAGCCAGTCAGGCTGGA	Amplification of the mutated DNA region in phoQ gene of E. coli genome	Miyake et al, 2020
phoQ_PHOP_LL_F	TCGTCTTCACCTCGAAAGCAGTTTATCGATGGTCT	Amplification of the mutated DNA region in phoQ gene of E. coli genome	This study
phoR_check_R	TTTCGCAGCTGCATCTGGTGTAAGC	Amplification of the mutated DNA region in phoR gene of E. coli genome	Miyake et al, 2020
phoR_K031S	GGCTTAGATCTGGTCGAAGCGGAAGATTAT	Amplification of the mutated DNA region in phoR gene of E. coli genome	Miyake et al, 2020
pta_check_F	GCCACCGCCTGGCGAAATACATCGG	Amplification of the mutated DNA region in pta gene of E. coli genome	This study
pta_check_R	GGCAAACTGGTGCTTACGTGTCGGG	Amplification of the mutated DNA region in pta gene of E. coli genome	This study
pyrR_check_R	TCTTTCCACGCGGTGATGAACACAA	Amplification of the mutated DNA region in pyrR gene of E. coli genome	This study
pyrR_K432S	CTGTCGCAGATCTTCTCCACGCAACTGGAG	Amplification of the mutated DNA region in pyrR gene of E. coli genome	This study
pyrS_check_R	ACCCACGGGCCAAACAGAATCCCGC	Amplification of the mutated DNA region in pyrS gene of E. coli genome	This study
pyrS_YPDA_LL_F	TCGTCTTCACCTCGACACCGTCCGGGTTACCCATG	Amplification of the mutated DNA region in pyrS gene of E. coli genome	This study
pyrS_K228S	GTCACCAAGATCTAGCGTCGCCAGCATCAG	Amplification of the mutated DNA region in pyrS gene of E. coli genome	This study
qseB_check_R	CACAGATAATCGTCAGCTCCCAGAC	Amplification of the mutated DNA region in qseB gene of E. coli genome	Miyake et al, 2020
qseB_K283S	TTCGCAGATCTGTAGTTGAGCAATTCAGGG	Amplification of the mutated DNA region in qseB gene of E. coli genome	Miyake et al, 2020
qseC_check_R	AGGACCATTCTGCCGTCGTGGGTAA	Amplification of the mutated DNA region in qseC gene of E. coli genome	This study
qseC_K433S	GATAGAAGATCTCATGCTGATTGGCGACGG	Amplification of the mutated DNA region in qseC gene of E. coli genome	This study
rcnA_check_R	CCCGCCAAAGGCAATTAACC	Amplification of the mutated DNA region in rcnA gene of E. coli genome	This study
rcnR_Lux_R	ACTAACTAGAGGATCATGAAGAACCAGGCG TTTCCTTGCT	Amplification of the mutated DNA region in rcnR gene of E. coli genome	This study
rcnAR_Lux_F2	TCGTCTTCACCTCGACGCGTTGTAAACGAG GAAAAACGGC	Amplification of the mutated DNA region in rcnRA genes of E. coli genome	This study
rcsB_check_R	CTTGGGAAATGGCGCTTGATGTACT	Amplification of the mutated DNA region in rcsB gene of E. coli genome	This study
rcsB_K211S	CGGGAAGATCTTGGTACACGCTACTCTGTG	Amplification of the mutated DNA region in rcsB gene of E. coli genome	This study
rcsC_check_R	GCGATGTACTTCAGCTCTTTCATCA	Amplification of the mutated DNA region in rcsC gene of E. coli genome	This study
rcsC_K212T	CCGAGGAGATCTCCATTACGCTCAATGGGG	Amplification of the mutated DNA region in rcsC gene of E. coli genome	This study
rcsD_check_R	TCCTGTTTCAGGCGCGTCTCTTGTA	Amplification of the mutated DNA region in rcsD gene of E. coli genome	This study
rcsD_K210S	CATACAGATCTACCCTCATTAATCAGTCGG	Amplification of the mutated DNA region in rcsD gene of E. coli genome	This study
rob_N015T	GAAGATCTCAATCCCCCTTTAATACCACCG	Amplification of the mutated DNA region in rob gene of E. coli genome	This study
rob_check_R	TGAGAGTCGAAGCGGTATTGCAGCG	Amplification of the mutated DNA region in rob gene of E. coli genome	This study
rpoF_check_F	CCCCAAATAACCCCTCATTTCACC	Amplification of the mutated DNA region in rpoF gene of E. coli genome	This study
rpoF_check_R	CTCCAGTTGCCCTATTGCCTGTGC	Amplification of the mutated DNA region in rpoF gene of E. coli genome	This study
rpoF_check_F2	GATTAACTGAGACTGACGGCAACGCC	Amplification of the mutated DNA region in rpoF gene of E. coli genome	This study
rpoH_check_F	GGTCTGATAAAACAGTGAATGATA	Amplification of the mutated DNA region in rpoH gene of E. coli genome	This study
rpoH_check_R	CCAGTGAACGGCGAAGGAGACCAG	Amplification of the mutated DNA region in rpoH gene of E. coli genome	This study
rpoH_check_F2	GCGTGTTATACTCTTTCCCTGCAAT	Amplification of the mutated DNA region in rpoH gene of E. coli genome	This study
rpoN_check_F	TACAAGACGAACACGTTAAGCGTG	Amplification of the mutated DNA region in rpoN gene of E. coli genome	This study
rpoN_check_R	CTCGTCGTCAATGTAGTCACCGCT	Amplification of the mutated DNA region in rpoN gene of E. coli genome	This study
rpoN_check_F2	TGCCCGCGCACTGGCTGCGAATCCG	Amplification of the mutated DNA region in rpoN gene of E. coli genome	This study
rpoS_check_F	ATGAGTCAGAATACGCTGAAAGTT	Amplification of the mutated DNA region in rpoS gene of E. coli genome	This study
rpoS_check_R	ACGGCGGGCAATTTTTACCACCAG	Amplification of the mutated DNA region in rpoS gene of E. coli genome	This study
rpoS_check_F2	CGGGAACAACAAGAAGTTAAGGCGG	Amplification of the mutated DNA region in rpoS gene of E. coli genome	This study
rssB_check_R	TCTGCCATATTTTCAGTGGCAGATA	Amplification of the mutated DNA region in rssB gene of E. coli genome	This study
rssB_K116S	GATCGAGATCTGTTCCCGTCGCTTTGCGGC	Amplification of the mutated DNA region in rssB gene of E. coli genome	This study
rstA_check_R	GCTTTGTAGGGAGTCAGAGACGTTT	Amplification of the mutated DNA region in rstA gene of E. coli genome	Miyake et al, 2020
rstA_LL_F	TCGTCTTCACCTCGAGCAAAGGTCGGGAAAAGTGG	Amplification of the mutated DNA region in rstA gene of E. coli genome	Miyake et al, 2020
rstB_check_R	TCATCAAGATGGTATTTACTCAGTG	Amplification of the mutated DNA region in rstB gene of E. coli genome	This study
rstB_K471S	GATGCAGATCTCGGTTCACTGATTGCCGCG	Amplification of the mutated DNA region in rstB gene of E. coli genome	This study
soxS_check_F	GTTTCGCCACTTCGCCGGGGGTTAG	Amplification of the mutated DNA region in soxS gene of E. coli genome	This study
soxS_check_R	GTCTGCTGCGAGACATAACCCAGGT	Amplification of the mutated DNA region in soxS gene of E. coli genome	This study
stpA-Lux-F	TCGTCTTCACCTCGATCGCATAGCGTATATCGCTGGCTAT	Amplification of the mutated DNA region in stpA gene of E. coli genome	This study
stpA-middle2	GCTGGCGTTTTTTACCAGCGCGTGG	Amplification of the mutated DNA region in stpA gene of E. coli genome	This study
torR_check_R	ACCAGAATAATCCCCACCGTTGAGC	Amplification of the mutated DNA region in torR gene of E. coli genome	Miyake et al, 2020
torR_K097T	ACTGCAGATCTAAGCCGCTACTCATATCCG	Amplification of the mutated DNA region in torR gene of E. coli genome	Miyake et al, 2020
torS_check_R	CCCTGCGCCTGCCACATCTTTTCGT	Amplification of the mutated DNA region in torS gene of E. coli genome	This study
torS_K096T	CCGGCAGATCTTGCGCGAAAACCTTCGACC	Amplification of the mutated DNA region in torS gene of E. coli genome	This study
uhpA_check_R	CTGTCGTGAACGGAGAGCATAATCG	Amplification of the mutated DNA region in uhpA gene of E. coli genome	This study
uhpA_K334T	ATGATAGATCTTCAGGAGATGGCGACCGCC	Amplification of the mutated DNA region in uhpA gene of E. coli genome	This study
uhpB_check_R	ATCAATAACGGAAAATGGGTTAAAC	Amplification of the mutated DNA region in uhpB gene of E. coli genome	This study
uhpB_K435T	TATAGAAGATCTCCTCATCGTCCGCTCCGG	Amplification of the mutated DNA region in uhpB gene of E. coli genome	This study
uvrY_check_R	ATGATTTTGACATCAGCTGTGGAAC	Amplification of the mutated DNA region in uvrY gene of E. coli genome	This study
uvrY_K179T	GCCGGAGATCTATTACTGACGGTAGGCTTG	Amplification of the mutated DNA region in uvrY gene of E. coli genome	This study
ybaQ_check-F	AGGGATGGCGCAAATGGAGTTGGAG	Amplification of the mutated DNA region in ybaQ gene of E. coli genome	This study
ybaQ_check-R_3	GACCTTTTTTGCACGCTCTTCACGG	Amplification of the mutated DNA region in ybaQ gene of E. coli genome	This study
ybiJ_check_F	TGTGACTGCCACGCGGTATAAAACA	Amplification of the mutated DNA region in ybiJ gene of E. coli genome	This study
ybiJ_check_R	CATCTGTTGCCGGATGCGGCGTAAAC	Amplification of the mutated DNA region in ybiJ gene of E. coli genome	This study
ydfH_LUX_F	TCGTCTTCACCTCGAGTAGCTGGCCGTATGCCGGTGGTAA	Amplification of the mutated DNA region in ydfH gene of E. coli genome	This study
ydfH_check_R	GCGCACTCAATGGCCTGACGGATAA	Amplification of the mutated DNA region in ydfH gene of E. coli genome	This study
ygeLK_check_R	TGAGCATCTATCTTATGCGATTTAA	Amplification of the mutated DNA region in ygeL gene of E. coli genome	This study
ygeLK_K422T	CCTGTAGATCTCCATATACCTACCAGTTTC	Amplification of the mutated DNA region in ygeL gene of E. coli genome	This study
yhjB_check_R	ATAACTTCCTGTAACCACCGTTTAT	Amplification of the mutated DNA region in yhjB gene of E. coli genome	This study
yhjB_K320T	TCATGAGATCTGGCGTGAGTTTGACCCGTC	Amplification of the mutated DNA region in yhjB gene of E. coli genome	This study
ylaC_check_F3	ACCATTGGTGATAACGTCGTGGTAG	Amplification of the mutated DNA region in ylaC gene of E. coli genome	This study
ylaC_check_R3	GCACGTCGATATCTTCATAGCGGTA	Amplification of the mutated DNA region in ylaC gene of E. coli genome	This study
ynfU_check_F	ATCCTCACCCCGATGTACACGGATG	Amplification of the mutated DNA region in ynfU gene of E. coli genome	This study
ynfU_check_R	ATGACTCCCACAAAAAGCACCACAA	Amplification of the mutated DNA region in ynfU gene of E. coli genome	This study
zntA_ZNTAF	GGCGCTCTCTGAATTCGTTGGCGCT	Amplification of the mutated DNA region in zntA gene of E. coli genome	This study
zntA_ZNTAR	ATGCCGCTGGAATTCCAGCTATAGC	Amplification of the mutated DNA region in zntA gene of E. coli genome	This study
zraR_check_R	GTCATAATCAGCACCGGAATTGCCG	Amplification of the mutated DNA region in zraR gene of E. coli genome	This study
zraR_K438S	CGCTGGGAGATCTTGCGGCAGGCGTTGCCC	Amplification of the mutated DNA region in zraR gene of E. coli genome	This study
zraS_check_R	GGCTGTCCCGCCATCTCTTCCAGAA	Amplification of the mutated DNA region in zraS gene of E. coli genome	This study
zraS_K373S	TGGCAAGATCTGATTTCTGTCGCTGGCAAC	Amplification of the mutated DNA region in zraS gene of E. coli genome	This study
pEX_For	GGAGCAGACAAGCCCGTCAGG	Sequencing for the N20 region in psgRNA plasmid	Miyake et al, 2020
pEX_Rev	CAGGCTTTACACTTTATGCTTCCGGC	Sequencing for the N20 region in psgRNA plasmid	Miyake et al, 2020
pheU_LUX_F2	TCGTCTTCACCTCGACCAGGCGGATGTCGACACTGCACATC	Construction of pLux-pheU	This study
pheU_LUX_R2	ACTAACTAGAGGATCTATCCGGGCAACGGGGCGCATTAAACC	Construction of pLux-pheU	This study
thrW_LUX_F2	TCGTCTTCACCTCGAAGTGGCGGTAAGCACACAAAAACTC	Construction of pLux-thrW	This study
thrW_LUX_R2	ACTAACTAGAGGATCAACGTGAATCACGGTGGACAAGGTT	Construction of pLux-thrW	This study
glnHPQ_Lux_F	TCGTCTTCACCTCGAAAAGTTACCCGCTGGACATCCACAA	Construction of pLux-glnH	This study
glnHPQ_Lux_R	ACTAACTAGAGGATCAGCATTTCCTTTTTTCTATCCACGG	Construction of pLux-glnH	This study
fecA_Lux_F	TCGTCTTCACCTCGAGCAGCAGCACGCTGTGGAAGTGCTT	Construction of pLux-fecA	This study
fecA_Lux_R	ACTAACTAGAGGATCACCTTCCCCATCATCATTTTTGTTG	Construction of pLux-fecA	This study
yhfG_LUX_F	TCGTCTTCACCTCGAGGTATTTGGTAAAGTGGTGAAAGGC	Construction of pLux-yhfG	This study
yhfG_LUX_R	ACTAACTAGAGGATCTTGATGCCTCCCTGAACGTGTCCAT	Construction of pLux-yhfG	This study
dnaK_LUX_F	TCGTCTTCACCTCGATTTCACAATGCGACAAACAGGAAGT	Construction of pLux-dnaK	This study
dnaK_LUX_R	ACTAACTAGAGGATCCTAAACGTCTCCACTATATATTCGG	Construction of pLux-dnaK	This study
