# Supplementary material
Source: Research Square preprint supplement (doi:10.21203/rs.3.rs-9685923/v1)
Supplement: Supplementary file 3 [file 5c1a17c57ebffa63361e6349.xlsx]

## Sheet: Table S1-1
Table S1-1. The plasmids used in this study.
Name	Characterization	Reference
pCas	repAts kan Pcas-cas9 ParaB-red lacIq Ptrc-sgRNA-pMB1	Jiang et al., 2015
psgRNA	pMB1, bla, PJ23119-truncated sgRNA (sgRNA cloning vector)	Miyake et al., 2020
pLUX	pSC101, kan, promter-less luxCDABE	Burton et al., 2010
pLux-pheU	pLUX, PpheU-luxCDABE	This study
pLux-thrW	pLUX, PthrW-luxCDABE	This study
pLux-pstS	pLUX, PpstS-luxCDABE	Miyake et al., 2020
pLux-glnH	pLUX, PglnH-luxCDABE	This study
pLux-fecA	pLUX, PfecA-luxCDABE	This study
pLux-yhfG	pLUX, PyhfG-luxCDABE	This study
pLux-dnaK	pLUX, PdnaK-luxCDABE	This study

## Sheet: Table S1-2
Table S1-2. The psgRNA plasmids as genome cutter.
Name	Consruction methoda	N20 sequence (5'→3')b	Target position at 5' of N20b	Target position at 3' of N20b	Transformation efficiencyc	Reference
psgRNA-dnaK2	Substitution cloning	CAACTCTTGTGTAGCGATTA	12198	12217	0.167414	This study
psgRNA-dnaK3	Substitution cloning	TCTTGTGTAGCGATTATGGA	12202	12221	0.0132378	This study
psgRNA-dnaK1	Substitution cloning	CATAATCGCTACACAAGAGT	12219	12200	0.146809	This study
psgRNA-dnaK4	Substitution cloning	TGGCACCACTCCTCGCGTGC	12222	12241	0.188633	This study
psgRNA-dnaK7	Substitution cloning	CGCGTGCTGGAGAACGCCGA	12235	12254	0.150172	This study
psgRNA-dnaK5	Substitution cloning	GTTCTCCAGCACGCGAGGAG	12249	12230	0.0178151	This study
psgRNA-dnaK6	Substitution cloning	TCGGCGTTCTCCAGCACGCG	12254	12235	0.160056	This study
psgRNA-dnaK8	Substitution cloning	AGGCGTGGTGCGATCGCCTT	12273	12254	0.150547	This study
psgRNA-dnaK9	Substitution cloning	ATAGGCAATGATAGAAGGCG	12288	12269	0.0486492	This study
psgRNA-cra3	Substitution cloning	CTCGGCTGGCGGGAGTGTCG	88047	88066	0.070412	This study
psgRNA-cra2-13	Typical DNA cloning	GTTAATAACATAGCTTGCAG	88093	88074	0.000301889	This study
psgRNA-cra1	Substitution cloning	CAAAACCGTTGAAAAAGTCA	88123	88142	0.21272	This study
psgRNA-aroP-pdhR1	Substitution cloning	GAATGCACCCGCTTTATGCA	121704	121723	0.00919418	This study
psgRNA-aroP-pdhR2	Substitution cloning	TCTTCAACCATGCATAAAGC	121733	121714	0.0137392	This study
psgRNA-aroP-pdhR3	Substitution cloning	TTGAGGCTGAGCTTTACAAA	121775	121756	0.230056	This study
psgRNA-aceE4	Substitution cloning	AGAACGTTTCCCAAATGACG	123022	123041	0.000278558	This study
psgRNA-aceE1	Synthetic gene	ATCCGATCGAAACTCGCGAC	123045	123064	0.179882	This study
psgRNA-aceE2	Synthetic gene	CGAAACTCGCGACTGGCTCC	123052	123071	0.0496584	This study
psgRNA-aceE5	Substitution cloning	CGATCGGATCCACGTCATTT	123053	123034	0	This study
psgRNA-aceE6	Substitution cloning	TCGATCGGATCCACGTCATT	123054	123035	0.113094	This study
psgRNA-aceE3	Synthetic gene	CTGGCTCCAGGCGATCGAAT	123064	123083	0.142675	This study
psgRNA-aceF1	Synthetic gene	AGTTGAAATCACCGAGATCC	125736	125755	0	This study
psgRNA-aceF2	Synthetic gene	AGAAGGCGACAAAGCCTCTA	125805	125824	0.142675	This study
psgRNA-aceF3	Synthetic gene	CGGAGACGGAACTTCCATAG	125841	125822	0.0124518	This study
psgRNA-aceF4	Substitution cloning	AGCAGACGCTGCACCTGCTC	125934	125953	0.640917	This study
psgRNA-aceF6	Substitution cloning	AGAGAAGAAAGAAGCAGCTC	125961	125980	0.0968992	This study
psgRNA-aceF5	Substitution cloning	TTCTTCTCTTCTGCCTGAGC	125969	125950	0.131579	This study
psgRNA-lpd1	Synthetic gene	AAAACTCAGGTCGTGGTACT	127927	127946	0.142675	This study
psgRNA-lpd2	Synthetic gene	AAACTCAGGTCGTGGTACTT	127928	127947	0	This study
psgRNA-lpd3	Synthetic gene	AACTCAGGTCGTGGTACTTG	127929	127948	0	This study
psgRNA-lpd-yacH1	Substitution cloning	AGAAGTAATTTTTCGTTTGC	129329	129348	0.29057	This study
psgRNA-lpd-yacH2	Substitution cloning	TTTTCGTTTGCCGGAACATC	129338	129357	0.00818713	This study
psgRNA-lpd-yacH3	Substitution cloning	TTTTTAATTGCCGGATGTTC	129370	129351	0.0274123	This study
psgRNA-acnB1	Synthetic gene	TGGTTTGCATCCAGGGGTTT	131691	131672	0.086865	This study
psgRNA-acnB3	Synthetic gene	GCTGCTGAAAAACCCGCCCG	131710	131729	0.179882	This study
psgRNA-acnB2	Synthetic gene	TTTCAGCAGCTCTACAAGTG	131719	131700	0	This study
psgRNA-rsePp2	Substitution cloning	AGATCGTATTGATAGCCTGA	196459	196478	0.0147406	This study
psgRNA-rsePp3	Substitution cloning	TCTAAAATACCACCGTGTCC	196461	196442	0	This study
psgRNA-rsePp1	Substitution cloning	TATTGATAGCCTGACGGCTG	196465	196484	0	This study
psgRNA-fabZ2	Substitution cloning	GCACCGTTTCCCGTTCTTAC	202154	202173	0.204296	This study
psgRNA-fabZ3	Substitution cloning	CCGTTTCCCGTTCTTACTGG	202157	202176	0.0189078	This study
psgRNA-fabZ1	Substitution cloning	AGTAAGAACGGGAAACGGTG	202174	202155	0.268639	This study
psgRNA-fabZ4	Substitution cloning	CCACCAGTAAGAACGGGAAA	202179	202160	0.244669	This study
psgRNA-fabZ5	Substitution cloning	CGCGATCCACCAGTAAGAAC	202185	202166	0.214957	This study
psgRNA-fabZ6	Substitution cloning	ACGCGATCCACCAGTAAGAA	202186	202167	0.211224	This study
psgRNA-dapA3-1	Substitution cloning	AAACCGGCAAATGAAACGCA	245744	245763	0.00734256	This study
psgRNA-dpaA2	Substitution cloning	AACCGGCAAATGAAACGCAC	245745	245764	0.293331	This study
psgRNA-dpaA1	Substitution cloning	ATCCCGTGCGTTTCATTTGC	245769	245750	0.0260695	This study
psgRNA-betA3	Substitution cloning	ATTATTGGTGCCGGCTCAGC	327229	327210	0.0228502	This study
psgRNA-betA2	Substitution cloning	GACTACATCATTATTGGTGC	327238	327219	0.243395	This study
psgRNA-betA1	Substitution cloning	CAATTTGACTACATCATTAT	327244	327225	0.18462	This study
psgRNA-yahK2	Synthetic gene	TAAACAACCACTTGAACCGA	342916	342935	0	This study
psgRNA-yahK1	Synthetic gene	CGGTTCAAGTGGTTGTTTAG	342934	342915	0.217088	This study
psgRNA-yahK3	Synthetic gene	GATATCACCCGGCGTGAACC	342938	342957	0	This study
psgRNA-lacZ16	Substitution cloning	TGCGCAGCCTGAATGGCGAA	366151	366132	0.125199	This study
psgRNA-lacZ15	Substitution cloning	CTATTACGCCAGCTGGCGAA	366187	366206	0.249996	This study
psgRNA-lacZ14	Substitution cloning	CACATCCCCCTTTCGCCAGC	366217	366198	0.00638361	This study
psgRNA-lacZ13	Substitution cloning	CGATTAAGTTGGGTAACGCC	366226	366245	0.0156453	This study
psgRNA-lacZ12	Substitution cloning	GATTAAGTTGGGTAACGCCA	366227	366246	0.00263027	This study
psgRNA-lacZ3-1	Typical DNA cloning	GTCACGACGTTGTAAAACGA	366258	366277	0.0178384	This study
psgRNA-lacZ11	Substitution cloning	CGTCGTGACTGGGAAAACCC	366266	366247	0.111359	This study
psgRNA-lacZ5-2	Typical DNA cloning	CGTTTTACAACGTCGTGACT	366276	366257	0.00104645	This study
psgRNA-lacI8	Substitution cloning	GGCTGGCCTGGTTCACCACG	367426	367445	0.956158	This study
psgRNA-lacI7	Substitution cloning	GCTGGCCTGGTTCACCACGC	367427	367446	0	This study
psgRNA-lacI5	Substitution cloning	CTGGTTCACCACGCGGGAAA	367433	367452	0.440261	This study
psgRNA-lacI3	Substitution cloning	AACGGTCTGATAAGAGACAC	367451	367470	1.33403	This study
psgRNA-lacI6	Substitution cloning	CGTTTCCCGCGTGGTGAACC	367454	367435	0.177699	This study
psgRNA-lacI4	Substitution cloning	TTATCAGACCGTTTCCCGCG	367463	367444	0.226824	This study
psgRNA-lacI1	Substitution cloning	GCGACATCGTATAACGTTAC	367482	367501	0.892308	This study
psgRNA-lacI2	Substitution cloning	TACGATGTCGCAGAGTATGC	367492	367473	0.473373	This study
psgRNA-mhpF1	Synthetic gene	CTGGAGATGGCGGTGATGGT	373005	373024	0.235691	This study
psgRNA-mhpF2	Synthetic gene	GGCATTGATCCTCAGTCCGA	373026	373045	0	This study
psgRNA-mhpF3	Synthetic gene	CGCGCCAGACCGTCGGACTG	373057	373038	0.105468	This study
psgRNA-frmA3	Synthetic gene	AACGATTTCCAGCGGTTTAC	379518	379537	0.272898	This study
psgRNA-frmA2	Synthetic gene	ACGATTTCCAGCGGTTTACC	379519	379538	0	This study
psgRNA-frmA1	Synthetic gene	ATTTGCTCCCGGTAAACCGC	379548	379529	0.161278	This study
psgRNA-phoB1-17	Typical DNA cloning	CGAACAAAATGGCTTTCAGC	417207	417226	0	Miyake et al, 2020 (as the psgRNA-phoB)
psgRNA-phoB2-3	Typical DNA cloning	TGGCTTTCAGCCGGTCGAAG	417216	417235	0.716475	This study
psgRNA-phoB3-11	Typical DNA cloning	TGAATCAACTGAATGAACCC	417257	417276	0	This study
psgRNA-phoB4-6	Typical DNA cloning	TCAACTGAATGAACCCTGGC	417261	417280	0.672916	This study
psgRNA-phoB8	Substitution cloning	CGGATTTAATTCTCCTCGAC	417281	417300	0.330448	This study
psgRNA-phoB9	Substitution cloning	CTCCTCGACTGGATGTTACC	417292	417311	0	This study
psgRNA-phoB5-1	Typical DNA cloning	AGGAGAATTAAATCCGGCCA	417296	417277	0.497965	This study
psgRNA-phoB6	Substitution cloning	GAGGAGAATTAAATCCGGCC	417297	417278	0.366387	This study
psgRNA-phoB7	Substitution cloning	CAGTCGAGGAGAATTAAATC	417302	417283	0.306316	This study
psgRNA-phoBR4-3	Typical DNA cloning	GGTGATATAGTCATCCGCGC	417453	417434	0.00152424	This study
psgRNA-phoR1-14	Typical DNA cloning	GCTGCTACTTTGCTGCCTCC	417927	417946	0.224583	This study
psgRNA-phoR2-4	Typical DNA cloning	CACCCAGGATGAAAGCCGGG	417964	417945	0.000841241	Miyake et al., 2020 (as the psgRNA-phoR)
psgRNA-phoR3-1	Typical DNA cloning	GGTAACCAAAAAATGCACCC	417979	417960	0.000473198	This study
psgRNA-phoBR6-10	Typical DNA cloning	CGGTAACAGGACTGCTTATC	418001	418020	0.268267	This study
psgRNA-phoBR7-3	Typical DNA cloning	TAGCGTTGAAGATAACGGAC	418944	418963	0.636132	This study
psgRNA-phoBR1-59	Typical DNA cloning	ACGCTAAATTCGGCACCGTG	418949	418930	0.000555259	This study
psgRNA-phoBR2-5	Typical DNA cloning	GCGCGTTCCCGGCAAACCGG	419023	419042	0.293985	This study
psgRNA-phoBR5-2	Typical DNA cloning	TCCGCTACCGCCGGTTTGCC	419052	419033	0.536497	This study
psgRNA-phoBR3-60	Typical DNA cloning	CTGAATATTGAGAGTACAGT	419101	419120	0.503617	This study
psgRNA-clpP1-1	Typical DNA cloning	CCATCGGCACCAGCGCCATA	456734	456715	0.28976	This study
psgRNA-clpP2-1	Typical DNA cloning	GTCATTGAACAGACCTCACG	456734	456753	0.000254842	This study
psgRNA-clpP3-1	Typical DNA cloning	GCAGATGCTGTTCCTGGAAG	456853	456872	0.87234	This study
psgRNA-clpX1-1	Typical DNA cloning	GAAGTGCGCAAGCTGATTGC	457495	457514	0.000552792	This study
psgRNA-clpX2-1	Typical DNA cloning	ACATTCGTCGCAGATATACA	457545	457526	0.43739	This study
psgRNA-clpX3-1	Typical DNA cloning	GCTGGATGTTCCGTTCACCA	457830	457849	0.000135501	This study
psgRNA-hupB1-15	Typical DNA cloning	TTGATCGACAAGATTGCTGC	461466	461485	0.000214445	This study
psgRNA-hupB2-8	Typical DNA cloning	TGATCGACAAGATTGCTGCA	461467	461486	0.000119594	This study
psgRNA-hupB3-1	Typical DNA cloning	GATCGACAAGATTGCTGCAG	461468	461487	0.659924	This study
psgRNA-ylaC3	Substitution cloning	ATTCAGAGACTCAATCGTTT	479204	479223	0	This study
psgRNA-ylaC2	Substitution cloning	ACTCAATCGTTTCGGTCAGC	479212	479231	0.000955731	This study
psgRNA-ylaC1	Substitution cloning	GGTCAGCAGGCGTTGTATTT	479225	479244	0.000477865	This study
psgRNA-apt1	Substitution cloning	CTCAAGCTGCTGTGCAGTCG	491438	491419	0.131328	This study
psgRNA-apt2	Substitution cloning	AAATAGCATCAAAAGCATTC	491447	491466	0.000196442	This study
psgRNA-apt3	Substitution cloning	ATTCAGGACTACCCAAAACC	491463	491482	0	This study
psgRNA-apt4	Substitution cloning	GGAAAAGAATGCCGGGTTTT	491496	491477	0.270619	This study
psgRNA-apt5	Substitution cloning	CGGAAAAGAATGCCGGGTTT	491497	491478	0.0134762	This study
psgRNA-apt6	Substitution cloning	ACATCGCGGAAAAGAATGCC	491503	491484	0.390503	This study
psgRNA-ybaQ1-1	Substitution cloning	TCATAGAGAAGAATATCTCC	508270	508251	0.00177739	This study
psgRNA-ybaQ6-1	Substitution cloning	TCGTAAACTCACTACTGAGA	508361	508380	0.00509289	This study
psgRNA-cueR3	Substitution cloning	ATTCGCTTCTATGAAGAGAA	514041	514060	0.00487476	This study
psgRNA-cueR1	Substitution cloning	AGCGAATGGCTTTGCTGGTC	514047	514028	0.0454978	This study
psgRNA-cueR2	Substitution cloning	CTTCTCTTCATAGAAGCGAA	514061	514042	0.0139791	This study
psgRNA-fimZ7	Substitution cloning	GAAGGTAAAACCGTCTGTTC	564280	564299	0.0820087	This study
psgRNA-fimZ6	Substitution cloning	AAGGTAAAACCGTCTGTTCC	564281	564300	0.0684932	This study
psgRNA-fimZ5	Substitution cloning	TCCATAATGATTAAATCAAC	564314	564333	0.0708519	This study
psgRNA-fimZ3-3	Typical DNA cloning	ACGGGTTCGGAGATAATCGA	564337	564356	1.29237	This study
psgRNA-fimZ4	Substitution cloning	TCCTGTTGATTTAATCATTA	564337	564318	0.0334327	This study
psgRNA-fimZ2-1	Typical DNA cloning	ATTGCAGATTGTCCTGAAAA	564397	564378	0.000459137	This study
psgRNA-fimZ1-1	Typical DNA cloning	TCAATAGACATTCTGATGAT	564422	564441	0.00181637	Ogawa et al, 2022 (as the psgRNA-fimZ)
psgRNA-cusS3-14	Typical DNA cloning	GGCTGATAAAAAAGGTCAGG	594707	594726	0.000429573	This study
psgRNA-cusS2-21	Typical DNA cloning	GCTGATAAAAAAGGTCAGGC	594708	594727	0.509366	This study
psgRNA-cusS1-32	Typical DNA cloning	AGGCGGGTTGCCAGCGAAAA	594724	594743	0.434953	This study
psgRNA-cusR7	Substitution cloning	ATATCCCAGCCGTTCACGTC	595259	595278	0.0565245	This study
psgRNA-cusR5	Substitution cloning	CGTCCGGCAGCATAATATCG	595275	595294	0.089069	This study
psgRNA-cusR6	Substitution cloning	ATTATGCTGCCGGACGTGAA	595290	595271	0.757025	This study
psgRNA-cusR4	Substitution cloning	AATCCTCGATATTATGCTGC	595300	595281	0.0440451	This study
psgRNA-cusR14	Substitution cloning	GGCCAAATCGACCACAAAAC	595354	595373	0.31118	This study
psgRNA-cusR12	Substitution cloning	ATCGACCACAAAACCGGCTT	595360	595379	0.00884017	This study
psgRNA-cusR15	Substitution cloning	GTGGTCGATTTGGCCGACAA	595368	595349	0.391573	This study
psgRNA-cusR10	Substitution cloning	ACCGGCTTCGGTTAACCCTT	595372	595391	0.970207	This study
psgRNA-cusR13	Substitution cloning	AGCCGGTTTTGTGGTCGATT	595378	595359	0.369162	This study
psgRNA-cusR11	Substitution cloning	GTTAACCGAAGCCGGTTTTG	595387	595368	0.10917	This study
psgRNA-cusR8	Substitution cloning	CCCTTTGGTCAAGTATTCTC	595387	595406	0.0223303	This study
psgRNA-cusR9	Substitution cloning	ACCAAAGGGTTAACCGAAGC	595395	595376	0.892557	This study
psgRNA-cusR3-28	Typical DNA cloning	CCGGAGAATACTTGACCAAA	595409	595390	0.000459137	This study
psgRNA-cusR2-2	Typical DNA cloning	ACCGGAGAATACTTGACCAA	595410	595391	0.000566059	Miyake et al, 2020 (as the psgRNA-cusR)
psgRNA-cusR1-25	Typical DNA cloning	GTCGAAGATGAAAAGAAAAC	595428	595409	0.546229	This study
psgRNA-cusA1-7	Typical DNA cloning	GCGCGTTGTTTCTGAGCATC	598769	598788	0.340312	This study
psgRNA-cusA2-6	Typical DNA cloning	CGCGTTGTTTCTGAGCATCT	598770	598789	0.00126401	This study
psgRNA-cusA3-3	Typical DNA cloning	TTCTGAGCATCTGGGGCACC	598778	598797	0.310395	This study
psgRNA-citA1-4	Typical DNA cloning	GCAGCGGAAATGCCAGTCTT	652295	652276	0.529791	This study
psgRNA-citA2-2	Typical DNA cloning	ATCAGCAAAAAGATACGCAG	652311	652292	0	This study
psgRNA-citA3-5	Typical DNA cloning	AATATTTGTCATTGCAGCCC	652324	652343	0.000177557	This study
psgRNA-citB1-2	Typical DNA cloning	CGTTGAGGACGAAACGCCGC	653888	653907	0.0073506	This study
psgRNA-citB2-1	Typical DNA cloning	GCCGCTGGCAGAGATGCATG	653903	653922	0.46623	This study
psgRNA-citB3-1	Typical DNA cloning	TCCGCATGCATCTCTGCCAG	653926	653907	0.422224	This study
psgRNA-fur3-4	Typical DNA cloning	AAAAATCCTGGAAGTTCTTC	710587	710568	0.697782	This study
psgRNA-fur1-13	Typical DNA cloning	AACGAGGAAGCGTTACTTTC	710589	710608	0.000131756	This study
psgRNA-fur2	Substitution cloning	GCTTCCTCGTTTAAAAATCC	710599	710580	0.00431204	This study
psgRNA-pgm1	Synthetic gene	ATAATATTGCGCCGTCAGTT	713638	713619	0	This study
psgRNA-pgm2	Synthetic gene	GAAACCAGAAGCAGGGAATG	713644	713663	0	This study
psgRNA-pgm3	Synthetic gene	AGCAGGGAATGCGGAGCACG	713653	713672	0.0682617	This study
psgRNA-kdpE3-42	Typical DNA cloning	CTTTCTGCGCACGGCGCTGG	721689	721670	1.01812	This study
psgRNA-kdpE2-8	Typical DNA cloning	TCGCTTTCTGCGCACGGCGC	721692	721673	1.08542	This study
psgRNA-kdpE1-63	Typical DNA cloning	TATTCGTCGCTTTCTGCGCA	721698	721679	0	Miyake et al, 2020 (as the psgRNA-kdpE)
psgRNA-kdpD3-11	Typical DNA cloning	GTTTGTTCCAGCAGACGATC	724365	724384	0.532821	This study
psgRNA-kdpD2-32	Typical DNA cloning	TTTGTTCCAGCAGACGATCG	724366	724385	0.000325642	This study
psgRNA-kdpD1-4	Typical DNA cloning	TCCCGACCCCGATCGTCTGC	724394	724375	0.000850693	This study
psgRNA-gltA3	Synthetic gene	GATGCGGTTGAAGTGAAGCC	754314	754333	0.124072	This study
psgRNA-gltA2	Synthetic gene	CGGGGATACAGCTGTTGAAC	754436	754417	0.0682617	This study
psgRNA-gltA1	Synthetic gene	AGCAAAACTCACCCTCAACG	754454	754435	0.0496584	This study
psgRNA-sdhA1	Substitution cloning	TATGGATTCGTTGTGGTGTG	755878	755897	0.583922	This study
psgRNA-sdhA3	Substitution cloning	GAATTTGATGCAGTTGTGAT	755925	755944	0.0153245	This study
psgRNA-sdhA2	Substitution cloning	ACTGCATCAAATTCTCTGAC	755938	755919	0.00066231	This study
psgRNA-sucA1	Substitution cloning	AGAACAGCGCTTTGAAAGCC	758710	758729	0.101824	This study
psgRNA-sucA2	Substitution cloning	CAGCGCTTTGAAAGCCTGGT	758714	758733	0.0871295	This study
psgRNA-sucA3	Substitution cloning	GAGGTAAGAAGAGTCCAACC	758750	758731	2.16166e-05	This study
psgRNA-sucB2	Substitution cloning	GGTAACGATCAAAGAGTTGC	762685	762704	0.0150376	This study
psgRNA-sucB1	Substitution cloning	GCAACTCTTTGATCGTTACC	762704	762685	0.423537	This study
psgRNA-sucB3	Substitution cloning	AGATCCGACGCGTCTGCTGC	762709	762728	0.000854409	This study
psgRNA-gpmA3	Synthetic gene	GGTAAGCTGCTGAAAGAGGA	787472	787453	0.217088	This study
psgRNA-gpmA2	Synthetic gene	AGCAGGTAAGCTGCTGAAAG	787476	787457	0.272898	This study
psgRNA-gpmA1	Synthetic gene	TTCGTCATGGCGAAAGTCAG	787570	787551	0	This study
psgRNA-ybhJ1	Synthetic gene	ATTGCCGAAGAACATTTCAC	803554	803573	0	This study
psgRNA-ybhJ2	Synthetic gene	CCAAAAAAGGCACTATTGCC	803597	803616	0	This study
psgRNA-ybhJ3	Synthetic gene	ATGCGAAGAGAGAATAGACC	803637	803618	0.105468	This study
psgRNA-rhlE3-1	Substitution cloning	CCTGCGCGCCGTTGCCGAGC	830907	830926	0.566442	This study
psgRNA-rhlE5-1	Substitution cloning	CTGCGCGCCGTTGCCGAGCA	830908	830927	0.303163	This study
psgRNA-rhlE1	Substitution cloning	CAACGGCGCGCAGGATATCA	830920	830901	0.219466	This study
psgRNA-rhlE2	Substitution cloning	GCAACGGCGCGCAGGATATC	830921	830902	0.313775	This study
psgRNA-rhlE4	Substitution cloning	CCTGCTCGGCAACGGCGCGC	830929	830910	0.171846	This study
psgRNA-rhlE6	Substitution cloning	ACGGTAACCCTGCTCGGCAA	830937	830918	0.221251	This study
psgRNA-ybiJ3	Substitution cloning	TCTGTCATTTGGCGTGTTCG	837881	837862	0.0168976	This study
psgRNA-ybiJ2	Substitution cloning	GCTCTTTCAACTCTGTCATT	837892	837873	0	This study
psgRNA-ybiJ1	Substitution cloning	CAATACTGTTGTTGCTGCTA	837914	837895	0.481582	This study
psgRNA-dps4-6	Typical DNA cloning	AGTAGAGTTGCTGAATCGCC	848825	848806	0.0012849	This study
psgRNA-dps3-11	Typical DNA cloning	CGCTGTCGGAGACATCGTTG	848839	848858	0.491023	This study
psgRNA-dps2-1	Typical DNA cloning	GCTGTCGGAGACATCGTTGC	848840	848859	0.515281	This study
psgRNA-dps1-14	Typical DNA cloning	GTTGCGGGTATAAAGCAGAT	848855	848874	0.391659	This study
psgRNA-artJ3	Substitution cloning	GGCAGAAGCACCGAAAGTAA	900519	900538	0.0505377	This study
psgRNA-artJ1	Substitution cloning	AGTAAAGGAAGCAAGTAAAG	900534	900553	0.0337484	This study
psgRNA-artJ2	Substitution cloning	TTACTTGCTTCCTTTACTTT	900551	900532	0.0283332	This study
psgRNA-artM3	Substitution cloning	TGTAGCCCTTTCATCAGTTC	901497	901516	0.0831933	This study
psgRNA-artM2	Substitution cloning	ATTTACCCGAACTGATGAAA	901524	901505	0.0357991	This study
psgRNA-artM1	Substitution cloning	TATTTACCCGAACTGATGAA	901525	901506	0.00110088	This study
psgRNA-ybjQ6-01	Substitution cloning	ATGCTGATGGTTAGCGTCAG	904869	904888	0.265499	This study
psgRNA-ybjQ5-02	Substitution cloning	GATGGTTAGCGTCAGCGGTA	904874	904893	0.432836	This study
psgRNA-ybjQ3	Substitution cloning	GGTTAGCGTCAGCGGTACGG	904877	904896	0.0354587	This study
psgRNA-ybjQ1	Substitution cloning	GATGAGAAGATTCTTCTGGC	904912	904931	0.0185371	This study
psgRNA-ybjQ4-01	Substitution cloning	GGTCGCTGCCGCTCTGTTAT	904933	904952	0.573487	This study
psgRNA-ltaE3	Substitution cloning	CGAGCATGGCGCGGCTTGGT	909243	909262	0.697496	This study
psgRNA-ltaE2	Substitution cloning	GAGCATGGCGCGGCTTGGTC	909244	909263	0.978539	This study
psgRNA-poxB3	Synthetic gene	GGCAGGGGTGAAACGCATCT	911005	910986	0	This study
psgRNA-poxB2	Synthetic gene	CGGCAGGGGTGAAACGCATC	911006	910987	0.179882	This study
psgRNA-poxB1	Synthetic gene	TATCGCCAAAACACTCGAAT	911026	911007	0	This study
psgRNA-clpA6	Typical DNA cloning	ATGACGGTGCTCGCGCGCTC	923329	923310	0.885122	This study
psgRNA-clpA1-1	Typical DNA cloning	GACCGTCGAGCACTTGTTAC	923338	923357	0.845478	This study
psgRNA-clpA4-1	Typical DNA cloning	CGACGGTCATAAACTCATGA	923345	923326	0.98963	This study
psgRNA-clpA7-2	Typical DNA cloning	GCTCAGTAACCCATCTGCCC	923365	923384	0.00143678	This study
psgRNA-clpA2-1	Typical DNA cloning	CGTTCTGCCTGCCAGTGAAG	923464	923483	0.912879	This study
psgRNA-clpA5-1	Typical DNA cloning	GGTCGCTATCTTTAGCGAAC	923590	923609	0.841503	This study
psgRNA-clpA3-1	Typical DNA cloning	GAAACTGTTCAAATCATCAA	924320	924339	0.607769	This study
psgRNA-cydC3	Substitution cloning	ACGTTTATACAGTGCCAGAT	929157	929176	0.0763942	This study
psgRNA-cydC2	Substitution cloning	CGTTTATACAGTGCCAGATA	929158	929177	0.025775	This study
psgRNA-cydC1	Substitution cloning	GCGCGCTTTGCTACCCTATC	929193	929174	0.0439836	This study
psgRNA-ihfB1-40	Typical DNA cloning	GGGAATGTGCGATTGCTGGG	963881	963862	0.000212976	This study
psgRNA-ihfB2-13	Typical DNA cloning	GGCGGGAATGTGCGATTGCT	963884	963865	0.330695	This study
psgRNA-ihfB3-5	Typical DNA cloning	TGGCGGGAATGTGCGATTGC	963885	963866	0.520925	This study
psgRNA-ycaR1	Substitution cloning	GCTTGAAATCATTGCCTGCC	970687	970706	1.39906	This study
psgRNA-ycaR2	Substitution cloning	ATTGCCTGCCCGGTTTGCAA	970697	970716	0.0239059	This study
psgRNA-ycaR3	Substitution cloning	CGGTTTGCAACGGAAAACTT	970707	970726	1.15084	This study
psgRNA-ycaR4	Substitution cloning	CGGAAAACTTTGGTATAACC	970717	970736	1.20861	This study
psgRNA-ycaR5	Substitution cloning	TTTTCCGTTGCAAACCGGGC	970723	970704	0.0121248	This study
psgRNA-ycaR6	Substitution cloning	AAAGTTTTCCGTTGCAAACC	970727	970708	0.0151688	This study
psgRNA-ycaR7	Substitution cloning	CAAAGTTTTCCGTTGCAAAC	970728	970709	0.155936	This study
psgRNA-ompF49	Substitution cloning	GTAAACGATACCCACAGCAA	985903	985922	0.522008	This study
psgRNA-ompF48	Substitution cloning	TCAGACGACACCGTTGCTGT	985935	985916	0.637726	This study
psgRNA-ompF43	Substitution cloning	GTTGATGATGTAGTCAACAT	985969	985988	0.0306569	This study
psgRNA-ompF42	Substitution cloning	GATGATGTAGTCAACATAGG	985972	985991	0.0175279	This study
psgRNA-ompF41	Substitution cloning	TCTGGTGAACTACTTTGAAG	986047	986028	0.0210868	This study
psgRNA-ompF39	Substitution cloning	TACGTCTTTCGCTTTAGATT	986068	986087	0.00736624	This study
psgRNA-ompF40	Substitution cloning	GCGAAAGACGTAGAAGGTAT	986079	986060	0.796864	This study
psgRNA-ompF38	Substitution cloning	GATTTGGTGTAAGCGATGGA	986084	986103	0.0692686	This study
psgRNA-ompF37	Substitution cloning	CAGAACGTCTTGCGTTTTGT	986143	986162	0.677789	This study
psgRNA-ompF36	Substitution cloning	CGTTTTGTTGGCGAAGCCGC	986155	986174	0.60933	This study
psgRNA-ompF35	Substitution cloning	TTTGTAAATTTATTAGTGAT	986180	986199	0.00187161	This study
psgRNA-ompF34	Substitution cloning	AGTGATCGGCGTAGCGTTAC	986194	986213	0.57163	This study
psgRNA-ompF33	Substitution cloning	ATCTACCTGGCAGCGAACTA	986244	986225	0	This study
psgRNA-ompF32	Substitution cloning	AAAGCTGAACAGTGGGCTAC	986289	986270	0.0264094	This study
psgRNA-ompF31	Substitution cloning	ACGGTAAAAAAGCTGAACAG	986297	986278	0.00895616	This study
psgRNA-ompF30	Substitution cloning	CAAGAGGTTGAGCTTCTTGC	986301	986320	0.874772	This study
psgRNA-ompF29	Substitution cloning	GAGCTTCTTGCAGGTTGGTA	986310	986329	0.980698	This study
psgRNA-ompF28	Substitution cloning	TACGAAGGCTTTGGTATCGT	986373	986354	0.488657	This study
psgRNA-ompF27	Substitution cloning	TCTATCAGCTACGAATACGA	986388	986369	0.0148188	This study
psgRNA-ompF26	Substitution cloning	CGTTCTAACGGCGACGGTGT	986415	986396	0.69404	This study
psgRNA-ompF25	Substitution cloning	GCACGCCGTTCTAACGGCGA	986421	986402	0.647733	This study
psgRNA-ompF23	Substitution cloning	TGTCACGCTCGTTTTTACCC	986424	986443	0.00483223	This study
psgRNA-ompF24	Substitution cloning	GACACTGCACGCCGTTCTAA	986427	986408	0.462444	This study
psgRNA-ompF20	Substitution cloning	AAAGAAGTTGGAGTTACGAT	986482	986501	0.227984	This study
psgRNA-ompF21	Substitution cloning	TAACTCCAACTTCTTTGGTC	986497	986478	0.0137979	This study
psgRNA-ompF19	Substitution cloning	GACTTCTTCGTTGGTCGTGT	986538	986519	0.289458	This study
psgRNA-ompF17	Substitution cloning	GCAGTATCACCACCAAATTC	986549	986568	0.00790502	This study
psgRNA-ompF15	Substitution cloning	CATAAACCACACCGTAGTTA	986598	986617	0.201555	This study
psgRNA-ompF16	Substitution cloning	GGTGTGGTTTATGATGCACT	986610	986591	0.00483223	This study
psgRNA-ompF13	Substitution cloning	GGTCTTAAATACGCTGACGT	986658	986639	0.138947	This study
psgRNA-ompF12	Substitution cloning	CAAAACGCGTCTGGCATTCG	986680	986661	2.73655	This study
psgRNA-ompF11	Substitution cloning	GAAGGCGCTGACGCTCAAAC	986706	986687	1.16646	This study
psgRNA-ompF10	Substitution cloning	TTCCAGGGTAACAACTCTGA	986724	986705	0.0212033	This study
psgRNA-ompF8	Substitution cloning	CTGACCATAACCGGTCAGAT	986737	986756	2.2702	This study
psgRNA-ompF9	Substitution cloning	TCAGTGGGAATATAACTTCC	986740	986721	0.0378788	This study
psgRNA-ompF7	Substitution cloning	CAAATCAATTCCGATCTGAC	986769	986750	1.19144	This study
psgRNA-ompF6	Substitution cloning	ATGCCCGTCTTGGTTTTAAA	986798	986779	0.0393931	This study
psgRNA-ompF5	Substitution cloning	GACATGACCTATGCCCGTCT	986808	986789	0.0399993	This study
psgRNA-ompF3	Substitution cloning	ACTGTTTTCACCGTTACCCT	986824	986843	0.0230056	This study
psgRNA-ompF4	Substitution cloning	AACGGTGAAAACAGTTACGG	986838	986819	0.0434572	This study
psgRNA-ompF2	Substitution cloning	GGTCTGCATTATTTTTCCAA	986862	986843	0	This study
psgRNA-ompF1	Substitution cloning	GATCTGTACGGTAAAGCTGT	986883	986864	0.0179849	This study
psgRNA-ompF47	Substitution cloning	GTCCCTGCTCTGTTAGTAGC	986952	986933	0.00855776	This study
psgRNA-ompF45	Substitution cloning	ATCATTATTTATTACCCTCA	986978	986997	0	This study
psgRNA-ompF46	Substitution cloning	AATGATGAAGCGCAATATTC	986983	986964	0.0244715	This study
psgRNA-ompF44	Substitution cloning	TGTCATAAAAAAAACCATGA	987014	986995	0.0043329	This study
psgRNA-ompA4e	Typical DNA cloning	GTTGTCCGGACGAGTGCCGA	1019514	1019533	0.461548	This study
psgRNA-ompA4c	Typical DNA cloning	ATCGGTGACGCACACACCAT	1019552	1019533	0.257551	This study
psgRNA-ompA3b	Typical DNA cloning	GTGGTTTTTACCATAAACGT	1019646	1019665	0.365361	This study
psgRNA-ompA3a	Typical DNA cloning	GACACTAAATCCAACGTTTA	1019678	1019659	0.293345	This study
psgRNA-ompA2-29	Typical DNA cloning	TTAGGTCGTATGCCGTACAA	1019819	1019800	0.000177845	This study
psgRNA-ompA1-14	Typical DNA cloning	TGTTGATGAAACCAGTGTCA	1019915	1019934	9.40642e-05	This study
psgRNA-yccX1	Synthetic gene	GCATAATTGCCTGGGTTTAC	1030077	1030096	0.105468	This study
psgRNA-yccX2	Synthetic gene	ACAGTACGAAGCGAAAAGAC	1030132	1030151	0	This study
psgRNA-yccX3	Synthetic gene	CAGTACGAAGCGAAAAGACT	1030133	1030152	0	This study
psgRNA-torS3-2	Typical DNA cloning	TCAGGGTTAACAGCGCCATC	1056115	1056134	0.000765331	This study
psgRNA-torS2-3	Typical DNA cloning	CAGGGTTAACAGCGCCATCA	1056116	1056135	0.000149207	This study
psgRNA-torS1-2	Typical DNA cloning	CTGGATGGGCTTTGCCCTGA	1056152	1056133	0.323186	This study
psgRNA-torR3-1	Typical DNA cloning	TGTAATCGCGCCTGGGTAAC	1057899	1057918	0.0719002	This study
psgRNA-torR2-1	Typical DNA cloning	TGAAGATGAGCCGGTTACCC	1057931	1057912	0.0414328	This study
psgRNA-torR1-4	Typical DNA cloning	TGTTATTGTTGAAGATGAGC	1057940	1057921	0	Miyake et al, 2020 (as the psgRNA-torR)
psgRNA-cbpM2	Substitution cloning	CTTCAGAGATGCCGGTATGC	1062792	1062811	0.00615371	This study
psgRNA-cbpM1	Substitution cloning	GCCGGTATGCAGGCAAAATT	1062802	1062821	0.0951383	This study
psgRNA-cbpM3	Substitution cloning	GCATACCGGCATCTCTGAAG	1062811	1062792	0.0358662	This study
psgRNA-cbpA3	Substitution cloning	GCGGGCAAGTCGACGATAGG	1063686	1063705	0.155493	This study
psgRNA-cbpA2	Substitution cloning	ATTGTCTTGAGATCGTCCGT	1063714	1063733	0.0155061	This study
psgRNA-cbpA1	Substitution cloning	CATCATGGGCGTGAAACCGA	1063752	1063733	0.405722	This study
psgRNA-agp1	Synthetic gene	CGCTCAGGCACAAACCGTAC	1065641	1065660	0.254295	This study
psgRNA-agp2	Synthetic gene	TAGCTGATAGCCTTCCGGTA	1065677	1065658	0	This study
psgRNA-agp3	Synthetic gene	GCGGCGCACGTAAGTTATGG	1065720	1065701	0.384518	This study
psgRNA-putP1-1	Substitution cloning	GGCTATTAGCACACCGATGT	1079307	1079326	0.537342	This study
psgRNA-putP3	Substitution cloning	ACATTTTGTGTCTATATCTT	1079332	1079351	0.588848	This study
psgRNA-putP2	Substitution cloning	ACACAAAATGTCACCAACAT	1079342	1079323	1.71228	This study
psgRNA-grxB51	Substitution cloning	GCGAATACAGGCTGCCGCGG	1123377	1123396	0.403666	This study
psgRNA-grxB49	Substitution cloning	GATTTAATCCTGACCCGCCG	1123413	1123394	1.23269	This study
psgRNA-grxB48	Substitution cloning	AATCAATTTGTTATCATCAA	1123437	1123418	1.0929	This study
psgRNA-grxB47	Substitution cloning	TCTGTTTCGCCATATTATCG	1123442	1123461	0	This study
psgRNA-grxB45	Substitution cloning	TATCGCGGTAATCAGCAACG	1123457	1123476	0	This study
psgRNA-grxB46	Substitution cloning	TGCTGATTACCGCGATAATA	1123473	1123454	0.898076	This study
psgRNA-grxB44	Substitution cloning	GCGGCTTGGCCAGTTAATTC	1123476	1123495	0.712758	This study
psgRNA-grxB41	Substitution cloning	GCGTCAGATTACGCAGTAGC	1123505	1123524	1.37416	This study
psgRNA-grxB43	Substitution cloning	CGCTGGTAGCCGGAATTAAC	1123507	1123488	0.417569	This study
psgRNA-grxB42	Substitution cloning	CGTAATCTGACGCTGGTAGC	1123517	1123498	0	This study
psgRNA-grxB40	Substitution cloning	TTCCGAAAGTTCGCCATTCA	1123545	1123564	0.351637	This study
psgRNA-grxB38	Substitution cloning	AGTTCGCCATTCACGGCGTT	1123552	1123571	0.0962311	This study
psgRNA-grxB39	Substitution cloning	CGCCGTGAATGGCGAACTTT	1123569	1123550	0.0170855	This study
psgRNA-grxB37	Substitution cloning	GTCAAACCGAACGCCGTGAA	1123580	1123561	0.314672	This study
psgRNA-grxB35	Substitution cloning	TCTTAATCAGACCGTCAGAG	1123619	1123638	0.324403	This study
psgRNA-grxB34	Substitution cloning	GACCGTCAGAGTGGGCCAGC	1123628	1123647	0.145207	This study
psgRNA-grxB31	Substitution cloning	GTCGGCAAAATTACCCGCGC	1123650	1123669	0.277266	This study
psgRNA-grxB33	Substitution cloning	GACCTGCTGGCCCACTCTGA	1123652	1123633	0.000183059	This study
psgRNA-grxB32	Substitution cloning	GGGTAATTTTGCCGACCTGC	1123665	1123646	0.138959	This study
psgRNA-grxB30	Substitution cloning	CGACAAGAAAGAGGCCAGCG	1123686	1123667	0.173729	This study
psgRNA-grxB28	Substitution cloning	ACGAAATATTTGCGCGCGGC	1123687	1123706	0.134146	This study
psgRNA-grxB29	Substitution cloning	ATATTTCGTCGACAAGAAAG	1123695	1123676	0.00615247	This study
psgRNA-grxB27	Substitution cloning	AATGCCGATTTGGCAAAACG	1123726	1123745	0.01587	This study
psgRNA-grxB25	Substitution cloning	ACGCGGCAACAGCAGTTTGT	1123743	1123762	0.244079	This study
psgRNA-grxB26	Substitution cloning	GTTGCCGCGTTTTGCCAAAT	1123752	1123733	0.126321	This study
psgRNA-grxB23	Substitution cloning	CTTGCGCAGCCACTCTTCAA	1123779	1123798	0.129272	This study
psgRNA-grxB24	Substitution cloning	GAGTGGCTGCGCAAGGTCAA	1123793	1123774	0.195674	This study
psgRNA-grxB21	Substitution cloning	AATGGCAGGGGAACGTTTGC	1123797	1123816	0.184433	This study
psgRNA-grxB20	Substitution cloning	GAACGTTTGCCGGTCAGTAA	1123807	1123826	0.275504	This study
psgRNA-grxB22	Substitution cloning	GTTCCCCTGCCATTGAAGAG	1123810	1123791	0.12843	This study
psgRNA-grxB19	Substitution cloning	GACGGCAAACCGTTACTGAC	1123838	1123819	0.037143	This study
psgRNA-grxB17	Substitution cloning	TGAACGATGTCCATGCTTTC	1123855	1123874	0	This study
psgRNA-grxB18	Substitution cloning	CACTATGTCGATAAACTCGA	1123856	1123837	0.0317095	This study
psgRNA-grxB16	Substitution cloning	CCATGCTTTCTGGCATATAG	1123865	1123884	0.275788	This study
psgRNA-grxB15	Substitution cloning	CCGCTATATGCCAGAAAGCA	1123887	1123868	0.198579	This study
psgRNA-grxB14	Substitution cloning	CTGTCATCTTTTTGCAGAAT	1123888	1123907	0.0674291	This study
psgRNA-grxB13	Substitution cloning	CCTGTTTTTGACCGACCATC	1123913	1123932	0	This study
psgRNA-grxB12	Substitution cloning	TTTTGACCGACCATCCGGGT	1123918	1123937	0	This study
psgRNA-grxB11	Substitution cloning	GAAACACCCACCCGGATGGT	1123946	1123927	0.0162039	This study
psgRNA-grxB10	Substitution cloning	ACGACGCAGAAACACCCACC	1123954	1123935	0.13576	This study
psgRNA-grxB09	Substitution cloning	GAGCAGAACATGTAATTCGA	1123959	1123978	0.129821	This study
psgRNA-grxB08	Substitution cloning	GCAGAACATGTAATTCGACG	1123961	1123980	0.600285	This study
psgRNA-grxB07	Substitution cloning	ATTCGACGGGGATATTTTTC	1123973	1123992	0.0311373	This study
psgRNA-grxB06	Substitution cloning	TTTCAGGCCGAAAATCATGC	1123989	1124008	0.006976	This study
psgRNA-grxB04	Substitution cloning	ATGCGGGCTTTGAGGCAGTA	1124005	1124024	0.553632	This study
psgRNA-grxB03	Substitution cloning	TGCGGGCTTTGAGGCAGTAA	1124006	1124025	0.547064	This study
psgRNA-grxB05	Substitution cloning	CTCAAAGCCCGCATGATTTT	1124018	1123999	0.16846	This study
psgRNA-grxB02	Substitution cloning	CTTCACGTGACTCCTCCATT	1124049	1124068	0	This study
psgRNA-grxB01	Substitution cloning	GTGAACTGACAGCCAAATGG	1124083	1124064	0.311313	This study
psgRNA-ptsG1	Synthetic gene	GCCTATCGCAGGTATTCTGC	1157937	1157956	0	This study
psgRNA-ptsG2	Synthetic gene	TCGGTTCCGCGAATTTCAGC	1157963	1157982	0	This study
psgRNA-ptsG3	Synthetic gene	ATAACATGCGATACAACGGC	1158011	1157992	0	This study
psgRNA-nagK1	Substitution cloning	ATGTATTACGGGTTTGATAT	1178593	1178612	0.0167555	This study
psgRNA-nagK2	Substitution cloning	TATTACGGGTTTGATATTGG	1178596	1178615	0.016197	This study
psgRNA-nagK3	Substitution cloning	GGTGGAACAAAAATTGCGCT	1178614	1178633	0.188259	This study
psgRNA-nagK4	Substitution cloning	GCGCTTGGCGTGTTTGATAG	1178629	1178648	0.293029	This study
psgRNA-nagK5	Substitution cloning	TTGGCGTGTTTGATAGCGGT	1178633	1178652	0.121962	This study
psgRNA-nagK6	Substitution cloning	ATAGCGGTCGGCAGTTGCAG	1178645	1178664	0.380466	This study
psgRNA-nagK7	Substitution cloning	TAGCGGTCGGCAGTTGCAGT	1178646	1178665	0.0119085	This study
psgRNA-nagK8	Substitution cloning	GGCAGTTGCAGTGGGAAAAG	1178654	1178673	0.307605	This study
psgRNA-nagK9-1	Substitution cloning	GCAGTTGCAGTGGGAAAAGC	1178655	1178674	0.153569	This study
psgRNA-nagK10-1	Substitution cloning	TCATAGCTGTCACGCGGTGT	1178702	1178683	0.220349	This study
psgRNA-nagK11-1	Substitution cloning	AATGCGTCATAGCTGTCACG	1178708	1178689	0	This study
psgRNA-nagK12-1	Substitution cloning	TTTAGATGCAGTGTGTGAGC	1178709	1178728	0	This study
psgRNA-phoQ3-72	Typical DNA cloning	ACTACGTTTCGGCTGTTACG	1189638	1189619	0.000147013	This study
psgRNA-phoQ2-81	Typical DNA cloning	GTTTCGATAAAACTACGTTT	1189649	1189630	0	Miyake et al., 2020 (as the psgRNA-phoQ)
psgRNA-phoQ1-50	Typical DNA cloning	CTGGTGCTTTCGCTTGCCTA	1189701	1189682	0.384237	This study
psgRNA-phoP3-17	Typical DNA cloning	CGGGCGGTTAATACCAGAAT	1190206	1190225	0.271668	This study
psgRNA-phoP5-1	Typical DNA cloning	AACCGCCCGTGAAAGCTGGC	1190214	1190195	0.202937	This study
psgRNA-phoP4-2	Typical DNA cloning	TATTAACCGCCCGTGAAAGC	1190218	1190199	0	This study
psgRNA-phoP2-2	Typical DNA cloning	CGATGTTTCACTGCCGATTC	1190241	1190222	0.223424	This study
psgRNA-phoP1-23	Typical DNA cloning	GATATTGCGATTGTCGATCT	1190312	1190293	0.2717	Miyake et al, 2020 (as the psgRNA-phoP)
psgRNA-purB8	Substitution cloning	TCGCCGTAGCGTCCATCGAC	1191934	1191953	0.337621	This study
psgRNA-purB7	Substitution cloning	CGCCGTAGCGTCCATCGACA	1191935	1191954	0.339407	This study
psgRNA-purB9	Substitution cloning	GATAAAGTCAGCGCGCTGCG	1191935	1191916	0.296981	This study
psgRNA-purB6	Substitution cloning	GCCGTAGCGTCCATCGACAG	1191936	1191955	0.30424	This study
psgRNA-purB4	Substitution cloning	GCGTCCATCGACAGGGGAAA	1191942	1191961	0.00868759	This study
psgRNA-purB3	Substitution cloning	TCCATCGACAGGGGAAACGG	1191945	1191964	0.00242229	This study
psgRNA-purB1	Substitution cloning	AGGGGAAACGGCGGTCAGTG	1191954	1191973	0.494425	This study
psgRNA-purB2	Substitution cloning	ACCGCCGTTTCCCCTGTCGA	1191968	1191949	0.861791	This study
psgRNA-icd1	Synthetic gene	AAGAAGATCACCCTGCAAAA	1195156	1195175	0.310105	This study
psgRNA-icd2	Synthetic gene	GTTGAGTTTGCCGTTTTGCA	1195188	1195169	0	This study
psgRNA-icd3	Synthetic gene	CGTTGAGTTTGCCGTTTTGC	1195189	1195170	0	This study
psgRNA-prs3	Synthetic gene	AATACGTTGTGCTAGTTCCG	1261819	1261838	0	This study
psgRNA-prs2	Synthetic gene	ACGTTGTGCTAGTTCCGGGG	1261822	1261841	0	This study
psgRNA-prs1	Synthetic gene	TTTTGCTGGTAACGCCACCC	1261858	1261839	0	This study
psgRNA-narXL-17	Typical DNA cloning	AATGAAGCTCAAGTCTCGCG	1275239	1275220	0	This study
psgRNA-narL2-17	Typical DNA cloning	TTACGCCAGTTCGCAGCATC	1275763	1275782	0.0014881	This study
psgRNA-narL3-25	Typical DNA cloning	CGTAAAACAGCTTATCAGTA	1275767	1275748	0.995902	This study
psgRNA-narL1-17	Typical DNA cloning	GATCACCCGATGCTGCGAAC	1275790	1275771	1.11154	This study
psgRNA-narXL-15	Typical DNA cloning	CAGCGCCAAATTTGGCTTCC	1276203	1276184	0.414515	This study
psgRNA-narX3-8	Typical DNA cloning	TAAGCGCAACCTGATTAACC	1277567	1277586	0	This study
psgRNA-narX2-1	Typical DNA cloning	AAGCGCAACCTGATTAACCA	1277568	1277587	0.662735	This study
psgRNA-narX1-2	Typical DNA cloning	TCCGCTCACCCTGGTTAATC	1277598	1277579	0.00092854	This study
psgRNA-rssB1-8	Typical DNA cloning	GCAGGTATTTCGCTCGCTTC	1290289	1290308	0.209416	This study
psgRNA-rssB2-5	Typical DNA cloning	TTCGCTCGCTTCTGGATTCA	1290297	1290316	0.000515591	This study
psgRNA-rssB3-7	Typical DNA cloning	TTCCTCATTGGGAGCGACAA	1290322	1290341	0	This study
psgRNA-hns3-1	Typical DNA cloning	AGAATGTACACTTGAAACGC	1292866	1292847	0.725539	This study
psgRNA-hns2-51	Typical DNA cloning	TTGCCTGCGCACGAAGAGTA	1292868	1292887	0.307984	This study
psgRNA-hns1-7	Typical DNA cloning	CATCCGTACTCTTCGTGCGC	1292893	1292874	0.000141339	This study
psgRNA-adhE3	Synthetic gene	ATCTGCAGCAGCCAGAGCGG	1297990	1298009	0	This study
psgRNA-adhE2	Synthetic gene	CAGCAGCCAGAGCGGCGGCG	1297995	1298014	0.217088	This study
psgRNA-adhE1	Synthetic gene	AATCTTCCGCGCCGCCGCTC	1298023	1298004	0.161278	This study
psgRNA-trpC6	Substitution cloning	CCAGCGGTTGCTGCTGTTTG	1319710	1319729	0.0565029	This study
psgRNA-trpC3	Substitution cloning	CAGCGGTTGCTGCTGTTTGC	1319711	1319730	0.084728	This study
psgRNA-trpC5	Substitution cloning	CCGCAAACAGCAGCAACCGC	1319732	1319713	0.0619017	This study
psgRNA-trpC2	Substitution cloning	CGTCGCAGACAAGGCGATTT	1319762	1319743	0.163653	This study
psgRNA-trpC4	Substitution cloning	TCGTCGCAGACAAGGCGATT	1319763	1319744	0.0733046	This study
psgRNA-trpC1	Substitution cloning	AGCGAAAATCGTCGCAGACA	1319771	1319752	0.233935	This study
psgRNA-acnA1	Synthetic gene	GTAGTGGTAAGTTTTATCTT	1335896	1335877	0	This study
psgRNA-acnA3	Synthetic gene	GCCGCTTGCTGCTAAATCAC	1335905	1335924	0.142675	This study
psgRNA-acnA2	Synthetic gene	GTGATTTAGCAGCAAGCGGC	1335924	1335905	0.086865	This study
psgRNA-pyrF1	Substitution cloning	CAGGAGAATTCGTAACAGCG	1341969	1341950	0.00564208	This study
psgRNA-pyrF2	Substitution cloning	TCATAATCGTGATGACGCGC	1341989	1342008	0.00584971	This study
psgRNA-pyrF3	Substitution cloning	TGGGTCGATCTTGTCGACAA	1342034	1342015	0.125738	This study
psgRNA-ynaE5	Substitution cloning	CTTACTTCAGGAAGCTGCGC	1434172	1434191	0.431182	This study
psgRNA-ynaE6	Substitution cloning	CCTGAAGTAAGAATTATCCT	1434182	1434163	0.196867	This study
psgRNA-ynaE3	Substitution cloning	CTGCGCAGGGAACCACTTTA	1434186	1434205	0.817624	This study
psgRNA-ydbK3	Synthetic gene	ATCAGCCTGTTCTGCCATCG	1440674	1440693	0	This study
psgRNA-ydbK1	Synthetic gene	ATCGTGGAACTGGGGGTAAT	1440690	1440709	0.179882	This study
psgRNA-ydbK2	Synthetic gene	CAGTTCCACGATGGCAGAAC	1440701	1440682	0.179882	This study
psgRNA-adhP2	Synthetic gene	CACAACACTCCATTTTCAGC	1553736	1553755	0	This study
psgRNA-adhP3	Synthetic gene	CTGCTGAAAATGGAGTGTTG	1553757	1553738	0.198485	This study
psgRNA-adhP1	Synthetic gene	TGGCGAAGCCCTGCTGAAAA	1553767	1553748	0.142675	This study
psgRNA-marA2	Substitution cloning	GGACTGGATCGAGGACAACC	1619618	1619637	0.0273646	This study
psgRNA-marA1	Substitution cloning	CCAGTCCAAAATGCTATGAA	1619624	1619605	0.1007	This study
psgRNA-marA3	Substitution cloning	CCTGGAATCGCCACTGTCAC	1619636	1619655	0.104427	This study
psgRNA-marA5	Substitution cloning	GGAGAAAGTGTCAGAGCGTT	1619657	1619676	0.122649	This study
psgRNA-marA4	Substitution cloning	CCAGTGACAGTGGCGATTCC	1619658	1619639	0.105283	This study
psgRNA-marA6	Substitution cloning	GAGAAAGTGTCAGAGCGTTC	1619658	1619677	0.0354948	This study
psgRNA-marA7	Substitution cloning	AGCGTTCGGGTTACTCCAAA	1619671	1619690	0.127223	This study
psgRNA-marA8	Substitution cloning	ACTCCAAATGGCACCTGCAA	1619683	1619702	0.0120888	This study
psgRNA-marA9	Substitution cloning	CATCCGTTGCAGGTGCCATT	1619708	1619689	0.0277754	This study
psgRNA-ydfH2-2	Typical DNA cloning	TGCTGATTGACAGGCTGTGT	1628398	1628379	0.467899	This study
psgRNA-ydfH3-1	Typical DNA cloning	CTGCTGATTGACAGGCTGTG	1628399	1628380	0.47901	This study
psgRNA-ydfH4-2	Typical DNA cloning	CGATAAATCTGCTGATTGAC	1628407	1628388	0.392482	This study
psgRNA-ydfH5-4	Typical DNA cloning	GTCCATTGCCTGATTGCTCC	1628427	1628446	0.00121674	This study
psgRNA-ydfH6-1	Typical DNA cloning	TGCCTGGAGCAATCAGGCAA	1628451	1628432	0.526086	This study
psgRNA-ydfH7-1	Typical DNA cloning	ACGGTGTGCCTGGAGCAATC	1628457	1628438	0.000263513	This study
psgRNA-ynfU1	Substitution cloning	AACATTTAACGAGATAATTA	1640856	1640837	0.0601356	This study
psgRNA-ynfU2	Substitution cloning	CTCTTGGGTGCAGTTTGGGC	1640879	1640860	0.0769132	This study
psgRNA-ynfU3	Substitution cloning	CTGACTCTTGGGTGCAGTTT	1640883	1640864	2.01487	This study
psgRNA-ynfU5	Substitution cloning	AAAACTGTGTTCTGACTCTT	1640894	1640875	0.735429	This study
psgRNA-ynfU4	Substitution cloning	AAAAACTGTGTTCTGACTCT	1640895	1640876	0.711123	This study
psgRNA-ynfU6	Substitution cloning	AAAAACTGTGTTCTGACTCT	1640895	1640876	0.4698	This study
psgRNA-rstA6-19	Typical DNA cloning	GTGGAAGATGATGCGGAAGT	1682177	1682196	0.078836	This study
psgRNA-rstA7-15	Typical DNA cloning	TTCACTGATTGCCGCGTACC	1682200	1682219	0.0317734	Miyake et al, 2020 (as the psgRNA-rstA)
psgRNA-rstA1-4	Typical DNA cloning	CCTGGCAAAACATGATATGC	1682218	1682237	0.191866	This study
psgRNA-rstA8-1	Typical DNA cloning	CAGGTTACCGTAGAGCCGCG	1682237	1682256	0.0838451	This study
psgRNA-rstA3-7	Typical DNA cloning	GTCGTGATTTACGCGCAAAG	1682349	1682368	0	This study
psgRNA-rstA4-4	Typical DNA cloning	GATTTACGCGCAAAGTGGTC	1682354	1682373	0.0990462	This study
psgRNA-rstA2-21	Typical DNA cloning	TGCGCGTAAATCACGACAAA	1682365	1682346	0.0829332	This study
psgRNA-rstA5-1	Typical DNA cloning	AGAGAGGTTAGAAGAACAAT	1682400	1682381	0.0602569	This study
psgRNA-rstB5-1	Typical DNA cloning	CTTCCTTGTGATGTCTCTGC	1682926	1682945	0	This study
psgRNA-rstB4-5	Typical DNA cloning	GGAAGCAGACAAACAATAAC	1682930	1682911	0.503859	This study
psgRNA-rstB1-79	Typical DNA cloning	CAACCAGCAGAGACATCACA	1682951	1682932	0.186364	This study
psgRNA-rstB3-5	Typical DNA cloning	ACGCGCGGGCAAACAGTCGC	1682977	1682996	0.536616	This study
psgRNA-rstB2-5	Typical DNA cloning	CTGTTTGCCCGCGCGTTCGG	1682992	1682973	0.404382	This study
psgRNA-uidA3	Substitution cloning	AGTCTGGATCGCGAAAACTG	1696008	1695989	0.00234711	This study
psgRNA-uidA2	Substitution cloning	CGGCCTGTGGGCATTCAGTC	1696024	1696005	0.0907535	This study
psgRNA-uidA1	Substitution cloning	CGTGAAATCAAAAAACTCGA	1696044	1696025	0.00363469	This study
psgRNA-malX1	Synthetic gene	CAGCACCGAAAGTCACGCTG	1699368	1699387	0.105468	This study
psgRNA-malX2	Synthetic gene	TGGGAGTTCTTCCAGCAGTT	1699388	1699407	0	This study
psgRNA-malX3	Synthetic gene	GTGGCATTATTGTCGTTCTG	1699430	1699449	0.142675	This study
psgRNA-anmK4-1	Substitution cloning	AACATCAACACCATCAAGGC	1719543	1719562	0.365686	This study
psgRNA-anmK2-1	Substitution cloning	CTGACATAACGCCAATAAAG	1719569	1719588	0.000200915	This study
psgRNA-anmK3-2	Substitution cloning	ATGTCAGGCACCAGCCTTGA	1719575	1719556	0	This study
psgRNA-anmK1-2	Substitution cloning	ATGAAATCGGGCCGCTTTAT	1719602	1719583	0.140012	This study
psgRNA-punC1	Substitution cloning	CTGGCGGGTTTGAGCGTACT	1739941	1739960	0.534848	This study
psgRNA-punC2	Substitution cloning	GAAAGCAGGCAGATACATAT	1739997	1739978	0.338409	This study
psgRNA-punC3	Substitution cloning	GCCTGTATGGCGGCGAAAGC	1740011	1739992	0.440648	This study
psgRNA-pykF4	Substitution cloning	ACCAAAATTGTTTGCACCAT	1755707	1755726	0.00198601	This study
psgRNA-pykF5	Substitution cloning	TCCGATGGTGCAAACAATTT	1755730	1755711	0.093532	This study
psgRNA-pykF6	Substitution cloning	AGATTCGGTTTTCGGTCCGA	1755745	1755726	0.000902733	This study
psgRNA-pykF1	Synthetic gene	AGCTAACATCTCTTCAGATT	1755760	1755741	0.0124518	This study
psgRNA-pykF2	Synthetic gene	ATGCGTCTGAACTTCTCTCA	1755788	1755807	0.0124518	This study
psgRNA-pykF3	Synthetic gene	CATGGTGACTATGCAGAACA	1755806	1755825	0.161278	This study
psgRNA-lpp1-1	Substitution cloning	GAAAGCTACTAAACTGGTAC	1757423	1757442	0.265374	This study
psgRNA-lpp2-1	Substitution cloning	TACTAAACTGGTACTGGGCG	1757429	1757448	0.302453	This study
psgRNA-lpp3-1	Substitution cloning	GGTACTGGGCGCGGTAATCC	1757438	1757457	0.177576	This study
psgRNA-lpp4-2	Substitution cloning	AATCCTGGGTTCTACTCTGC	1757453	1757472	0.00021265	This study
psgRNA-lpp5-1	Substitution cloning	CTGATCGATTTTAGCGTTGC	1757507	1757488	0.213579	This study
psgRNA-lpp7-1	Substitution cloning	CGCAATGCGTTCCGACGTTC	1757567	1757586	0.438529	This study
psgRNA-lpp6-1	Substitution cloning	CGTTCACGTCGTTGCTCAGC	1757568	1757549	0	This study
psgRNA-lpp8-1	Substitution cloning	ATCTTTAGCAGCCTGAACGT	1757600	1757581	0.000539188	This study
psgRNA-lpp9	Substitution cloning	AGCTCGTGCTAACCAGCGTC	1757606	1757625	0.226975	This study
psgRNA-lpp10	Substitution cloning	TAACCAGCGTCTGGACAACA	1757615	1757634	0.597299	This study
psgRNA-ppsA3	Synthetic gene	CTACATCATTCATGCCGAGT	1787049	1787068	0	This study
psgRNA-ppsA2	Synthetic gene	GTGCTTTGGTATAACCAACT	1787085	1787066	0.0496584	This study
psgRNA-ppsA1	Synthetic gene	GCTCGTCACCGCTGGTGCTT	1787099	1787080	0.291501	This study
psgRNA-ihfA9-1	Typical DNA cloning	GGCGAACAGGTGAAACTCTC	1795432	1795413	0.312165	This study
psgRNA-ihfA7-2	Typical DNA cloning	CGCTCTGGAAAACGGCGAAC	1795445	1795426	0.650593	This study
psgRNA-ihfA6-3	Typical DNA cloning	ATCCGTCGCGCTCTGGAAAA	1795453	1795434	0.32519	This study
psgRNA-ihfA5-1	Typical DNA cloning	CGAAGAGATCCGTCGCGCTC	1795460	1795441	0.290895	This study
psgRNA-ihfA8-1	Typical DNA cloning	AAACAGTTCAACCAGTTCTT	1795463	1795482	0.00052172	This study
psgRNA-ihfA4-11	Typical DNA cloning	TAAGCTTGGGCTTAGCAAGC	1795511	1795492	9.65669e-05	This study
psgRNA-ihfA3-15	Typical DNA cloning	ATAAGCTTGGGCTTAGCAAG	1795512	1795493	0.000374633	This study
psgRNA-ihfA2-1	Typical DNA cloning	AATATCTGTTTGATAAGCTT	1795524	1795505	0.000210098	This study
psgRNA-ihfA1-7	Typical DNA cloning	GAATATCTGTTTGATAAGCT	1795525	1795506	0.392773	This study
psgRNA-pfkB1	Synthetic gene	ATTGTTGCGCTATCGAGAGA	1806422	1806403	0	This study
psgRNA-pfkB2	Synthetic gene	AATTGTTGCGCTATCGAGAG	1806423	1806404	0.161278	This study
psgRNA-pfkB3	Synthetic gene	ACCCCGCAAATTTATCCCGA	1806424	1806443	0	This study
psgRNA-gapA1	Synthetic gene	CCTGTTAGACGCTGATTACA	1862872	1862891	0	This study
psgRNA-gapA2	Synthetic gene	CTGAAATATGACTCCACTCA	1862903	1862922	0.0310551	This study
psgRNA-gapA3	Synthetic gene	TGTTACCGCTGAACGTGATC	1862989	1863008	0.086865	This study
psgRNA-yeaD1	Synthetic gene	TTTACGACGGGAGAGGACAG	1863915	1863896	0	This study
psgRNA-yeaD2	Synthetic gene	AGTTTACGACGGGAGAGGAC	1863917	1863898	0	This study
psgRNA-yeaD3	Synthetic gene	CATCCAGTTTACGACGGGAG	1863922	1863903	0.235691	This study
psgRNA-manY1	Substitution cloning	TACCACTCTTCAAATTGTGC	1903090	1903109	0.0178167	This study
psgRNA-manY2	Substitution cloning	TACCAGCACAATTTGAAGAG	1903114	1903095	0.187029	This study
psgRNA-manY3	Substitution cloning	TTTATCGTAGCCTGTATCGC	1903115	1903134	0.0154803	This study
psgRNA-manY4	Substitution cloning	CGTAGCCTGTATCGCAGGTA	1903120	1903139	0.310191	This study
psgRNA-manY5	Substitution cloning	GTAGCCTGTATCGCAGGTAT	1903121	1903140	0.112551	This study
psgRNA-manY6	Substitution cloning	TGATCCCATACCTGCGATAC	1903147	1903128	0.156353	This study
psgRNA-manY7	Substitution cloning	GGTGAAACTGAAATTCATCG	1903172	1903153	0.27287	This study
psgRNA-manY9-2	Substitution cloning	TCCGCTAATCGCGTGTACCC	1903174	1903193	0.00392256	This study
psgRNA-manY11-2	Substitution cloning	GCTAATCGCGTGTACCCTGG	1903177	1903196	0.148529	This study
psgRNA-manY12-1	Substitution cloning	CTAATCGCGTGTACCCTGGT	1903178	1903197	0.348069	This study
psgRNA-manY8	Substitution cloning	GGGTACACGCGATTAGCGGA	1903193	1903174	0.258337	This study
psgRNA-manY10-1	Substitution cloning	ACCAGGGTACACGCGATTAG	1903197	1903178	0.0556838	This study
psgRNA-manZ3	Substitution cloning	CTCACTCAAAGTGATATTCG	1903931	1903950	0.0359649	This study
psgRNA-manZ1	Substitution cloning	TTGAGTGAGTTTTTTCTCGG	1903939	1903920	0.0163015	This study
psgRNA-manZ2	Substitution cloning	ACTTTGAGTGAGTTTTTTCT	1903942	1903923	0.0220102	This study
psgRNA-manZ4	Substitution cloning	CCTGCGTTCTAACCTCTTCC	1903960	1903979	0.212601	This study
psgRNA-manZ6	Substitution cloning	CTGCGTTCTAACCTCTTCCA	1903961	1903980	0.0237471	This study
psgRNA-manZ7	Substitution cloning	CTAACCTCTTCCAGGGTTCA	1903968	1903987	0.388788	This study
psgRNA-manZ5	Substitution cloning	CCTGGAAGAGGTTAGAACGC	1903982	1903963	0.00898365	This study
psgRNA-manZ10-2	Substitution cloning	ATGGAACTTCGAACGTATGC	1903987	1904006	0.0651675	This study
psgRNA-manZ11-2	Substitution cloning	CTTCGAACGTATGCAGGCAC	1903993	1904012	0.0822284	This study
psgRNA-manZ8	Substitution cloning	AGTTCCATGAACCCTGGAAG	1903994	1903975	0.200886	This study
psgRNA-manZ12-1	Substitution cloning	TTCGAACGTATGCAGGCACT	1903994	1904013	0	This study
psgRNA-manZ9-1	Substitution cloning	GTTCGAAGTTCCATGAACCC	1904000	1903981	0.310692	This study
psgRNA-yebO15	Substitution cloning	AACCGATTTTTGACTCTCAA	1908300	1908319	0.181717	This study
psgRNA-yebO13	Substitution cloning	GTCTTTTTATCTGCTTTCTC	1908322	1908341	0.198934	This study
psgRNA-yebO14	Substitution cloning	GACCGTTGAGAGTCAAAAAT	1908324	1908305	0.157321	This study
psgRNA-yebO12-1	Substitution cloning	TGAACTGCTTGAGGCGTTGC	1908420	1908401	0.233183	This study
psgRNA-yebO10	Substitution cloning	CTGTTCGTTAGTCCGTGAAC	1908423	1908442	0.385552	This study
psgRNA-yebO11-1	Substitution cloning	CGAACAGATTGAACTGCTTG	1908429	1908410	0.13173	This study
psgRNA-yebO9	Substitution cloning	TTATCAATCGTGCCAGTTCA	1908457	1908438	0.0379406	This study
psgRNA-yebO8	Substitution cloning	TTCTTATCGGGCTCATCTTG	1908484	1908465	0.0212141	This study
psgRNA-yebO7	Substitution cloning	CGGTGGTGGTTCTTCTTATC	1908496	1908477	0.00106137	This study
psgRNA-yebO6	Substitution cloning	TCGGTGGTGGTTCTTCTTAT	1908497	1908478	0.445557	This study
psgRNA-yebO5	Substitution cloning	GTCTTTGGTTGTATCGGTGG	1908510	1908491	0.625691	This study
psgRNA-yebO4	Substitution cloning	TGCGTCTTTGGTTGTATCGG	1908513	1908494	0.429303	This study
psgRNA-yebO3	Substitution cloning	CATTGCGTCTTTGGTTGTAT	1908516	1908497	0.306481	This study
psgRNA-yebO2	Substitution cloning	CGTGATGAACATTGCGTCTT	1908525	1908506	0.311564	This study
psgRNA-yebO1	Substitution cloning	ATGAACGAAGTTGTAAATTC	1908548	1908529	0.337031	This study
psgRNA-yebG3	Substitution cloning	AATGTCGTTTACCAGCAAAA	1930700	1930681	0.0225301	This study
psgRNA-yebG2	Substitution cloning	AAATACGTAGTCATTCGTGA	1930732	1930713	0.580151	This study
psgRNA-yebG1	Substitution cloning	TAAATACGTAGTCATTCGTG	1930733	1930714	0	This study
psgRNA-pykA1	Synthetic gene	ACAAAAATCGTTACCACGTT	1937670	1937689	0.142675	This study
psgRNA-pykA2	Synthetic gene	ATCTGTTGCTGGGCCTAACG	1937705	1937686	0	This study
psgRNA-pykA3	Synthetic gene	TCTTGAAAAAGTTATCGCGG	1937717	1937736	0	This study
psgRNA-cheY2-2	Typical DNA cloning	GTTACGCACTATGCGTCGCA	1967369	1967388	0.265499	This study
psgRNA-cheY1-3	Typical DNA cloning	ACGCACTATGCGTCGCATGG	1967372	1967391	1.17015	This study
psgRNA-cheY3-5	Typical DNA cloning	GCGTAACCTGCTGAAAGAGC	1967375	1967356	0.870894	This study
psgRNA-cheB2-2	Typical DNA cloning	TGATGATTTCTGTCATGATC	1968432	1968451	1.43977	This study
psgRNA-cheB3-2	Typical DNA cloning	CATCAACAGCCATAGCGACA	1968436	1968417	0.00194341	This study
psgRNA-cheB1-1	Typical DNA cloning	GGTGTTATCTGTCGATGATT	1968487	1968468	0.00100305	This study
psgRNA-cheA3-3	Typical DNA cloning	TGACATGGAGCAGCATTTGC	1975262	1975243	0.00017935	This study
psgRNA-cheA2-3	Typical DNA cloning	GGACGAACTGTTGGCTGACA	1975277	1975258	0.662879	This study
psgRNA-cheA1-1	Typical DNA cloning	TGATGAAGCGGACGAACTGT	1975286	1975267	0.000204088	This study
psgRNA-uvrY9-15	Typical DNA cloning	GGGTATAAAAGTCGTCGGTG	1995285	1995266	0.80904	This study
psgRNA-uvrY8-1	Typical DNA cloning	ATAAAGGGTATAAAAGTCGT	1995290	1995271	0.284023	This study
psgRNA-uvrY7-13	Typical DNA cloning	CGCATTCTGGAAGATATAAA	1995305	1995286	0.24746	This study
psgRNA-uvrY3-28	Typical DNA cloning	ACGCATTCTGGAAGATATAA	1995306	1995287	0.0959248	This study
psgRNA-uvrY2-28	Typical DNA cloning	TCCCTGCGCGCACCAGTTCG	1995311	1995330	0.0238638	This study
psgRNA-uvrY6-3	Typical DNA cloning	CGCAGGGATACGACGCATTC	1995318	1995299	1.11305	This study
psgRNA-uvrY5-1	Typical DNA cloning	ACCACGAACTGGTGCGCGCA	1995334	1995315	0.703796	This study
psgRNA-uvrY4-2	Typical DNA cloning	GACCACGAACTGGTGCGCGC	1995335	1995316	1.06513	This study
psgRNA-uvrY1-11	Typical DNA cloning	ACTTGTTGATGACCACGAAC	1995345	1995326	0.134804	This study
psgRNA-rpoF3	Typical DNA cloning	GGAACTTGACGATCTGCTAC	2001673	2001654	0.0518505	This study
psgRNA-rpoF2	Typical DNA cloning	ATGCTTCGTGACGCACCAGC	2001705	2001724	8.61e-05	This study
psgRNA-rpoF1	Typical DNA cloning	TAATGGATAAACACTCGCTG	2001761	2001742	0.0628673	This study
psgRNA-yedV1-2	Typical DNA cloning	CAGTAGCAATATAAAAAGCA	2038099	2038118	0.710227	This study
psgRNA-yedV3-1	Typical DNA cloning	CTACTGTCTGTTGCTGGCGC	2038104	2038085	1.49974	This study
psgRNA-yedV2-2	Typical DNA cloning	ATATTGCTACTGTCTGTTGC	2038110	2038091	0	This study
psgRNA-yedW17	Substitution cloning	TGATTATGCATTGATCATTC	2038695	2038676	0.00405844	This study
psgRNA-yedW13	Substitution cloning	CCCATCTCTGCCATCAGAAA	2038716	2038735	0.678969	This study
psgRNA-yedW16	Substitution cloning	TGGGCTTTATCTTGCGCTGA	2038719	2038700	0.391672	This study
psgRNA-yedW15	Substitution cloning	CCGTTTCTGATGGCAGAGAT	2038738	2038719	0.334268	This study
psgRNA-yedW12	Substitution cloning	GCCGTTTCTGATGGCAGAGA	2038739	2038720	1.03088	This study
psgRNA-yedW10	Substitution cloning	ATCGATGACATAACCCGCTT	2038740	2038759	0.593761	This study
psgRNA-yedW11	Substitution cloning	GTCATCGATGCCGTTTCTGA	2038748	2038729	0.0261262	This study
psgRNA-yedW8-79	Typical DNA cloning	GCCCCTGCGTTACCCATTCC	2038766	2038785	0.303957	This study
psgRNA-yedW8-79	Typical DNA cloning	GCCCCTGCGTTACCCATTCC	2038766	2038785	0.530575	This study
psgRNA-yedW7-24	Typical DNA cloning	CCCCTGCGTTACCCATTCCT	2038767	2038786	0.15303	This study
psgRNA-yedW7-24	Typical DNA cloning	CCCCTGCGTTACCCATTCCT	2038767	2038786	0.489787	This study
psgRNA-yedW14	Substitution cloning	ACGCAGGGGCTTTCCGAAGC	2038775	2038756	0.0113214	This study
psgRNA-yedW9-14	Typical DNA cloning	AACGCAGGGGCTTTCCGAAG	2038776	2038757	0.186635	This study
psgRNA-yedW9-14	Typical DNA cloning	AACGCAGGGGCTTTCCGAAG	2038776	2038757	0.437356	This study
psgRNA-yedW6-27	Typical DNA cloning	CCCAGGAATGGGTAACGCAG	2038789	2038770	0.39212	This study
psgRNA-yedW6-27	Typical DNA cloning	CCCAGGAATGGGTAACGCAG	2038789	2038770	0.413721	This study
psgRNA-yedW5-52	Typical DNA cloning	ACCCAGGAATGGGTAACGCA	2038790	2038771	0.0013617	This study
psgRNA-yedW5-52	Typical DNA cloning	ACCCAGGAATGGGTAACGCA	2038790	2038771	0.00763056	This study
psgRNA-yedW4-4	Typical DNA cloning	GACCCAGGAATGGGTAACGC	2038791	2038772	0.201249	This study
psgRNA-yedW4-4	Typical DNA cloning	GACCCAGGAATGGGTAACGC	2038791	2038772	0.511256	This study
psgRNA-yedW3-1	Typical DNA cloning	TAATCAAAGGACCCAGGAAT	2038800	2038781	0.148072	This study
psgRNA-yedW2-1	Typical DNA cloning	ATAATCAAAGGACCCAGGAA	2038801	2038782	0.045156	This study
psgRNA-yedW1-1	Typical DNA cloning	TGAAGATAATCAAAGGACCC	2038806	2038787	0.0644828	Miyake et al, 2020 (as the psgRNA-hprR)
psgRNA-hisG1	Synthetic gene	CGCATAGCTATGCAGAAATC	2090213	2090232	0.142675	This study
psgRNA-hisG2	Synthetic gene	TGAGTCATCACTTAAACGGC	2090254	2090235	0.142675	This study
psgRNA-hisG3	Synthetic gene	CGCGTGAGTCATCACTTAAA	2090258	2090239	0	This study
psgRNA-hisD1	Synthetic gene	TGACTGGAATAGCTGTACTG	2091117	2091136	0	This study
psgRNA-hisD2	Synthetic gene	ACGCCAGCTGTTAATGCGCC	2091147	2091166	0.179882	This study
psgRNA-hisD3	Synthetic gene	TCGCCGGGCGCATTAACAGC	2091172	2091153	0.179882	This study
psgRNA-hisC4	Substitution cloning	CGCTAAATCGGTAATAGTCA	2092427	2092408	0.0827232	This study
psgRNA-hisC5	Substitution cloning	GACGTTTTCACGCGCTAAAT	2092439	2092420	0.064598	This study
psgRNA-hisC3	Synthetic gene	GTATCAGTCGGCGCGTCGTC	2092454	2092473	0.0310551	This study
psgRNA-hisC6	Substitution cloning	GTATCAGTCGGCGCGTCGTC	2092454	2092473	0.109941	This study
psgRNA-hisC1	Synthetic gene	ACTGATACGGCGTCAGGTTG	2092461	2092442	0.0496584	This study
psgRNA-hisC2	Synthetic gene	GCGCCGACTGATACGGCGTC	2092467	2092448	0.0496584	This study
psgRNA-hisB3	Synthetic gene	CGAACCGCCGAGTGATTTTC	2093515	2093534	0.142675	This study
psgRNA-hisB1	Synthetic gene	ACTCGGCGGTTCGCTAATCA	2093527	2093508	0.198485	This study
psgRNA-hisB2	Synthetic gene	CACTCGGCGGTTCGCTAATC	2093528	2093509	0	This study
psgRNA-hisH4	Substitution cloning	AACGTGGTGATCCTTGATAC	2094538	2094557	0.0573501	This study
psgRNA-hisH5	Substitution cloning	GGTTGGCGCAGCCGGTATCA	2094571	2094552	0.0044049	This study
psgRNA-hisH6	Substitution cloning	CGAGTTCAGGTTGGCGCAGC	2094579	2094560	0.00462262	This study
psgRNA-hisH2	Synthetic gene	AAGTCTGCCATTGCGCGTCA	2094583	2094602	0.105468	This study
psgRNA-hisH1	Synthetic gene	TGGCAGACTTCACCGAGTTC	2094592	2094573	0.124072	This study
psgRNA-hisH3	Synthetic gene	TTCATAACCGTGACGCGCAA	2094612	2094593	0.0310551	This study
psgRNA-hisA1	Synthetic gene	AGATTTAATCGACGGCACTG	2095142	2095161	0	This study
psgRNA-hisA2	Synthetic gene	TACGGCAAACAGCGCGATTA	2095185	2095204	0.161278	This study
psgRNA-hisA3	Synthetic gene	CGACCCGCTGCCGCGATTGC	2095211	2095230	0.086865	This study
psgRNA-hisF4	Substitution cloning	CCATGTCTCGACGTTCGTGA	2095865	2095884	0.389741	This study
psgRNA-hisF1	Synthetic gene	TCTCGACGTTCGTGATGGTC	2095870	2095889	0	This study
psgRNA-hisF2	Synthetic gene	CGACGTTCGTGATGGTCAGG	2095873	2095892	0.0496584	This study
psgRNA-hisF6	Substitution cloning	CGTGATGGTCAGGTGGTGAA	2095880	2095899	0.0458542	This study
psgRNA-hisF8	Substitution cloning	CATCACGAACGTCGAGACAT	2095886	2095867	0.304019	This study
psgRNA-hisF5	Substitution cloning	CCATCACGAACGTCGAGACA	2095887	2095868	0.037814	This study
psgRNA-hisF7	Substitution cloning	TTTCGCAACCATGAAATCAT	2095910	2095929	0.00911592	This study
psgRNA-hisF9	Substitution cloning	CATTGGCGATATCGTGCCGC	2095927	2095946	0.328964	This study
psgRNA-hisF3	Synthetic gene	CGATATCGCCAATGATTTCA	2095940	2095921	0.105468	This study
psgRNA-hisF10	Substitution cloning	TCAGCGTAGCGTTTTGCCAG	2095965	2095946	0.311398	This study
psgRNA-hisI1	Synthetic gene	CTGGACTGGGAAAAAACCGA	2096641	2096660	0.161278	This study
psgRNA-hisI2	Synthetic gene	AAAAACCGACGGACTTATGC	2096652	2096671	0.086865	This study
psgRNA-hisI3	Synthetic gene	AATCACCGGCATAAGTCCGT	2096679	2096660	0	This study
psgRNA-glf4-1	Substitution cloning	TTTTAACTCATTCGCACAAA	2108267	2108286	0.000136418	This study
psgRNA-glf3-2	Substitution cloning	ATTGTTGGTTCTGGTTTGTT	2108314	2108295	0.000356075	This study
psgRNA-glf2-1	Substitution cloning	GATTATATCATTGTTGGTTC	2108323	2108304	0.132901	This study
psgRNA-glf1-1	Substitution cloning	ATGTACGATTATATCATTGT	2108329	2108310	0.0425601	This study
psgRNA-cpsG4-1	Substitution cloning	AACTGAATGAAGATATCGCC	2122924	2122905	0.20299	This study
psgRNA-cpsG3-2	Substitution cloning	TAATTTCCCGCGAATATCAT	2122932	2122951	0.24025	This study
psgRNA-cpsG1-1	Substitution cloning	AATATCATAGGCTTTAAAGC	2122944	2122963	0.00193498	This study
psgRNA-cpsG2-1	Substitution cloning	TTTAAAGCCTATGATATTCG	2122961	2122942	0.0014894	This study
psgRNA-yegD7-1	Substitution cloning	GTGTTTATTGGTTTTGATTA	2147674	2147693	0.245118	This study
psgRNA-yegD1	Substitution cloning	CGGTACAGCAAACTGTTCAG	2147694	2147713	0.275422	This study
psgRNA-yegD2	Substitution cloning	TACAGCAAACTGTTCAGTGG	2147697	2147716	1.87073	This study
psgRNA-yegD3	Substitution cloning	CAGTGGCGGTCATGCGTGA	2147711	2147729	0.392291	This study
psgRNA-yegD4	Substitution cloning	TAAACCGCATTTGCTAAAAA	2147733	2147752	0.682184	This study
psgRNA-yegD8-1	Substitution cloning	TTTTCCATTTTTAGCAAATG	2147759	2147740	0.000971461	This study
psgRNA-yegD6	Substitution cloning	TTGCGCGCCAACGCGTGAAG	2147787	2147806	0.324222	This study
psgRNA-yegD10	Substitution cloning	CGCGTGAAGCGGTAAGCGAA	2147798	2147817	0.217058	This study
psgRNA-yegD5	Substitution cloning	GTTGGCGCGCAAAGCATTGA	2147798	2147779	0.43064	This study
psgRNA-yegD9	Substitution cloning	TCGCTTACCGCTTCACGCGT	2147816	2147797	0.208736	This study
psgRNA-yegD11	Substitution cloning	GTACCGCCATCATGATGTTC	2147823	2147842	0.0835287	This study
psgRNA-yegD12	Substitution cloning	CTGCCGGAACATCATGATGG	2147848	2147829	0.142048	This study
psgRNA-baeS1-1	Typical DNA cloning	TATTACCGGCAAACTGTTTC	2162896	2162915	0.00105689	This study
psgRNA-baeS2-1	Typical DNA cloning	AATCGCCAGAAACAGTTTGC	2162923	2162904	0.000284091	This study
psgRNA-baeS3-5	Typical DNA cloning	GATCAGCAAGACAATGCAGG	2162950	2162931	0.00110973	This study
psgRNA-baeR2-1	Typical DNA cloning	CGTGGAAGATGAACCGAAGC	2164320	2164339	0.382889	This study
psgRNA-baeR3-4	Typical DNA cloning	GTGGAAGATGAACCGAAGCT	2164321	2164340	1.01227	This study
psgRNA-baeR1-1	Typical DNA cloning	TCTTCCACGATCAAAATACG	2164328	2164309	0.000932836	Miyake et al, 2020 (as the psgRNA-baeR)
psgRNA-fbaB3	Synthetic gene	CAGAAGGAATTGTCATACAA	2178489	2178508	0.0682617	This study
psgRNA-fbaB2	Synthetic gene	TCATACAACGGTGCTGTAAA	2178501	2178520	0	This study
psgRNA-fbaB1	Synthetic gene	ACGGTGCTGTAAAAGGTTGT	2178508	2178527	0.198485	This study
psgRNA-rcnR4-1	Typical DNA cloning	CTTTCAGTTTCTGTTTATCA	2185760	2185779	0.000134028	This study
psgRNA-rcnA2-4	Typical DNA cloning	TTCTTCAGCAAGGAAACGCC	2185936	2185955	0.000212976	This study
psgRNA-yehT3-1	Typical DNA cloning	CGCAGGTTCTCCCGTGCTAA	2212910	2212929	0	This study
psgRNA-yehT2-5	Typical DNA cloning	CGATGATGAACCGTTAGCAC	2212942	2212923	0.197671	This study
psgRNA-yehT1-2	Typical DNA cloning	TCGATGATGAACCGTTAGCA	2212943	2212924	0.119832	This study
psgRNA-yehU1-1	Typical DNA cloning	TGCATTAACGGTATGAATAA	2214541	2214560	0.94697	This study
psgRNA-yehU3-2	Typical DNA cloning	CATACCGTTAATGCAGGTCA	2214555	2214536	0.662879	This study
psgRNA-yehU2-4	Typical DNA cloning	ATTATTCATACCGTTAATGC	2214561	2214542	0.000433065	This study
psgRNA-mglC3	Substitution cloning	CTTACTTACCTGAAAGAGGG	2237726	2237707	0.893829	This study
psgRNA-mglC2	Substitution cloning	TTTCTTACTTACCTGAAAGA	2237729	2237710	0.040397	This study
psgRNA-mglC1	Substitution cloning	TTTTCTTACTTACCTGAAAG	2237730	2237711	0.108743	This study
psgRNA-mglA3	Substitution cloning	CTCAACGACTCCGTCCTCCG	2239281	2239262	0.0377801	This study
psgRNA-mglA2	Substitution cloning	GCTCAACGACTCCGTCCTCC	2239282	2239263	0.0328947	This study
psgRNA-mglA1	Substitution cloning	AGCTCAACGACTCCGTCCTC	2239283	2239264	0.0652174	This study
psgRNA-mglB3	Substitution cloning	TGCTGGCCATCACAGCAGAC	2240306	2240325	1.15736	This study
psgRNA-mglB2	Substitution cloning	GCTGGCCATCACAGCAGACA	2240307	2240326	0.0367975	This study
psgRNA-mglB1	Substitution cloning	GTTAACCCTGTCTGCTGTGA	2240334	2240315	0.918421	This study
psgRNA-yejG08	Substitution cloning	CACGGTCCATTTTGCGGAAT	2278131	2278150	0.142588	This study
psgRNA-yejG09	Substitution cloning	ATTCCGCAAAATGGACCGTG	2278150	2278131	0.00940573	This study
psgRNA-yejG07	Substitution cloning	GTTGAACCGATTCCGCAAAA	2278159	2278140	0.142913	This study
psgRNA-yejG3	Substitution cloning	GCAGACCAGCGATAGTTCTG	2278179	2278198	1.87818	This study
psgRNA-yejG6	Substitution cloning	TGCTGGTTTCGCAGGTTCGA	2278181	2278162	0.0453453	This study
psgRNA-yejG1	Substitution cloning	GATAGTTCTGCGGCAGTCGA	2278189	2278208	0.187546	This study
psgRNA-yejG5-1	Substitution cloning	CGCTGGTCTGCTGGTTTCGC	2278189	2278170	0.213912	This study
psgRNA-yejG4-2	Substitution cloning	CAGAACTATCGCTGGTCTGC	2278198	2278179	0.180484	This study
psgRNA-yejG2	Substitution cloning	GACTGCCGCAGAACTATCGC	2278206	2278187	0.000538178	This study
psgRNA-narP4-22	Typical DNA cloning	GATCATCCACTTATGCGACG	2290539	2290558	0.504934	This study
psgRNA-narP6-23	Typical DNA cloning	ACGCGGTGTTCGTCAGTTAC	2290556	2290575	1.21479	This study
psgRNA-narP5-5	Typical DNA cloning	CGAACACCGCGTCGCATAAG	2290567	2290548	0.408333	This study
psgRNA-narP7-3	Typical DNA cloning	CAGTTACTGGAGCTTGATCC	2290569	2290588	0.592342	This study
psgRNA-narP1-24	Typical DNA cloning	GCTTGATCCTGGCTCTGAAG	2290580	2290599	0.644397	This study
psgRNA-narP9-1	Typical DNA cloning	CTCTGAAGTGGTCGCCGAAG	2290592	2290611	0.695783	This study
psgRNA-narP8-2	Typical DNA cloning	TCGGCGACCACTTCAGAGCC	2290609	2290590	0.974684	This study
psgRNA-narP2-12	Typical DNA cloning	TGGAGGCATCGGATACGGTC	2290776	2290757	0.389241	This study
psgRNA-narP3-2	Typical DNA cloning	TTGCTGGAAGCGATTCGTGC	2290845	2290864	0.185127	This study
psgRNA-mqo3	Synthetic gene	GGGGACCTATTTACGCGAGC	2306617	2306598	0.217088	This study
psgRNA-mqo2	Synthetic gene	GAAACTGATGTACTGTTGAT	2306664	2306645	0.142675	This study
psgRNA-mqo1	Synthetic gene	GGCAAAAGCGAAAGCGTCCG	2306692	2306673	0.291501	This study
psgRNA-mqo5	Substitution cloning	CACGGCCATCGAGAAGAGCA	2306716	2306735	0.0527001	This study
psgRNA-mqo6	Substitution cloning	CATGCTCTTCTCGATGGCCG	2306737	2306718	0.0022158	This study
psgRNA-mqo4	Substitution cloning	GACTGCCATGCTCTTCTCGA	2306743	2306724	0.0461268	This study
psgRNA-ompC56	Substitution cloning	CGCTGAAAACAATGAAAAAA	2311591	2311610	0.753854	This study
psgRNA-ompC55	Substitution cloning	ACAATGAAAAAAGGGCCCGC	2311599	2311618	0.0469645	This study
psgRNA-ompC54	Substitution cloning	ATATCGAACAAAGGGCCTGC	2311636	2311617	0.0302433	This study
psgRNA-ompC53	Substitution cloning	GATATCGAACAAAGGGCCTG	2311637	2311618	0.0736358	This study
psgRNA-ompC52	Substitution cloning	ACTGATAACATCGTAGCTCT	2311687	2311668	0.0524846	This study
psgRNA-ompC51	Substitution cloning	CACTGATAACATCGTAGCTC	2311688	2311669	0.0117284	This study
psgRNA-ompC8f-2	Typical DNA cloning	TGCCAGCGTCACGAGTGAAC	2311693	2311712	0.000630294	This study
psgRNA-ompC49	Substitution cloning	TGAACTGGTTGTCGTCCAGC	2311708	2311727	0.0350301	This study
psgRNA-ompC50	Substitution cloning	AACCAGTTCACTCGTGACGC	2311717	2311698	0.658512	This study
psgRNA-ompC48	Substitution cloning	CACCAACATCAACATATTTC	2311783	2311802	0.729306	This study
psgRNA-ompC47	Substitution cloning	ATCCTGAAATATGTTGATGT	2311807	2311788	0.0232975	This study
psgRNA-ompC46	Substitution cloning	CGTCGTCGTAGCCACGACCC	2311813	2311832	0.908021	This study
psgRNA-ompC7h-1	Typical DNA cloning	AAAGGTAAAAACCTGGGTCG	2311846	2311827	0.337838	This study
psgRNA-ompC45-1	Substitution cloning	CAGTCTAAAGGTAAAAACCT	2311852	2311833	0.375421	This study
psgRNA-ompC44	Substitution cloning	GTGCTTTGTTCGCCCAACCC	2311918	2311937	0.98434	This study
psgRNA-ompC43	Substitution cloning	TGCTTTGTTCGCCCAACCCA	2311919	2311938	0.502564	This study
psgRNA-ompC40	Substitution cloning	CGCGAGTTGCGTTGTAGGTC	2311948	2311967	0.713542	This study
psgRNA-ompC39	Substitution cloning	GCGAGTTGCGTTGTAGGTCT	2311949	2311968	0.821181	This study
psgRNA-ompC42	Substitution cloning	TCGCGTAGGTTCCCTGGGTT	2311952	2311933	0.469136	This study
psgRNA-ompC41	Substitution cloning	CTCGCGTAGGTTCCCTGGGT	2311953	2311934	0.0630885	This study
psgRNA-ompC38	Substitution cloning	TCTGGGTGTACTGAGCAGCC	2311966	2311985	0.0127175	This study
psgRNA-ompC6d-4	Typical DNA cloning	ACCTACAACGCAACTCGCGT	2311966	2311947	0.136275	This study
psgRNA-ompC37	Substitution cloning	GTATTTCAGACCACCAGTGT	2312006	2312025	0.886162	This study
psgRNA-ompC34	Substitution cloning	GTTCTGAGCATCAGTACGTT	2312066	2312085	0.00759392	This study
psgRNA-ompC35	Substitution cloning	CAGAACACCGCTGCTTACAT	2312071	2312052	0.7343	This study
psgRNA-ompC33	Substitution cloning	AGCATCAGTACGTTTGGAGC	2312072	2312091	0.0604865	This study
psgRNA-ompC32-1	Substitution cloning	CAAAACGGCGACGGCGTCGG	2312164	2312145	0.262873	This study
psgRNA-ompC31	Substitution cloning	CGTCAAAACGGCGACGGCGT	2312167	2312148	0.636444	This study
psgRNA-ompC30	Substitution cloning	GCACTGCGTCAAAACGGCGA	2312173	2312154	0.391667	This study
psgRNA-ompC29	Substitution cloning	CGTGACGCACTGCGTCAAAA	2312179	2312160	0.448598	This study
psgRNA-ompC26	Substitution cloning	ATGGGTTGCCGTTTTTACCC	2312218	2312237	0	This study
psgRNA-ompC28	Substitution cloning	AACGGCAACCCATCTGGTGA	2312230	2312211	0.309693	This study
psgRNA-ompC27	Substitution cloning	GGTAAAAACGGCAACCCATC	2312236	2312217	0.137508	This study
psgRNA-ompC25	Substitution cloning	GTTCAGTACCAGGGTAAAAA	2312248	2312229	0.0156055	This study
psgRNA-ompC24	Substitution cloning	GACCGAAGAAGTCAGTGTTA	2312272	2312291	0.554361	This study
psgRNA-ompC23	Substitution cloning	GAAGAAGTCAGTGTTACGGT	2312276	2312295	0.0193477	This study
psgRNA-ompC22	Substitution cloning	TTCATGCAGCAGCGTGGTAA	2312329	2312310	0.0461339	This study
psgRNA-ompC21	Substitution cloning	GACAACTTCATGCAGCAGCG	2312335	2312316	0.551323	This study
psgRNA-ompC20	Substitution cloning	ACCGAATTCTGGCAGTACGT	2312354	2312373	0.0368324	This study
psgRNA-ompC19	Substitution cloning	TTCTGGCAGTACGTCGGTCC	2312360	2312379	0.0561466	This study
psgRNA-ompC18	Substitution cloning	TTGTTTATGACGTAACTTCC	2312400	2312381	0.0203874	This study
psgRNA-ompC17	Substitution cloning	AGTCGAAAGAACCCACATCC	2312419	2312438	0.417695	This study
psgRNA-ompC16	Substitution cloning	CAGACCTGCGAATGCCACAC	2312447	2312466	0.416561	This study
psgRNA-ompC15	Substitution cloning	TGCGAATGCCACACGGGTCC	2312453	2312472	0.594128	This study
psgRNA-ompC14	Substitution cloning	AAACAACTCCTGGACCCGTG	2312483	2312464	0.427609	This study
psgRNA-ompC13	Substitution cloning	CTGAAAACGAAAACAACTCC	2312493	2312474	0.536232	This study
psgRNA-ompC12	Substitution cloning	ACTGGCCGTAACCGGTCAGC	2312521	2312540	0.0574495	This study
psgRNA-ompC11	Substitution cloning	ACTGACCAGCTGACCGGTTA	2312548	2312529	0.477093	This study
psgRNA-ompC10	Substitution cloning	CAGGTTACTGACCAGCTGAC	2312554	2312535	0.421498	This study
psgRNA-ompC9-2	Substitution cloning	TGGCTTCAAAGGTGAAACTC	2312573	2312554	0.347267	This study
psgRNA-ompC7	Substitution cloning	TGTTGTCAGAGAAATAGTGC	2312608	2312627	0.309044	This study
psgRNA-ompC8	Substitution cloning	TCTGACAACAAAGATGTAGA	2312617	2312598	0.00667881	This study
psgRNA-ompC6	Substitution cloning	GATCTGTACGGTAAAGTAGA	2312653	2312634	0.131206	This study
psgRNA-ompC5	Substitution cloning	GCTGAAGTTTACAACAAAGA	2312686	2312667	0.262738	This study
psgRNA-ompC3	Substitution cloning	CAGCAGAGCTGGGACCAGGA	2312708	2312727	0.377493	This study
psgRNA-ompC4	Substitution cloning	CCTCCTGGTCCCAGCTCTGC	2312729	2312710	0.0102762	This study
psgRNA-ompC2	Substitution cloning	AGTTAAAGTACTGTCCCTCC	2312744	2312725	0.226144	This study
psgRNA-ompC1	Substitution cloning	AAATAAAGGCATATAACAGA	2312780	2312761	0.215843	This study
psgRNA-rcsD1-6	Typical DNA cloning	CCCCGGTAGGAGTGAAAAGC	2313538	2313519	0.622027	This study
psgRNA-rcsD2-5	Typical DNA cloning	TCCCCGGTAGGAGTGAAAAG	2313539	2313520	0.546324	This study
psgRNA-rcsD3-8	Typical DNA cloning	AGCGGGTAATGCTCCCCGGT	2313551	2313532	0.59105	This study
psgRNA-rcsD4-4	Typical DNA cloning	AAGAAGCGGGTAATGCTCCC	2313555	2313536	0.451413	This study
psgRNA-rcsD7-2	Typical DNA cloning	ACTGTTGATCATTGTGTTAC	2313559	2313578	0.000463192	This study
psgRNA-rcsD5-1	Typical DNA cloning	GATCAACAGTAAAAAGAAGC	2313568	2313549	0.433886	This study
psgRNA-rcsD8-1	Typical DNA cloning	CATTGTGTTACTGGTGACGA	2313568	2313587	0.433612	This study
psgRNA-rcsD6-1	Typical DNA cloning	TGATCAACAGTAAAAAGAAG	2313569	2313550	0.597041	This study
psgRNA-rcsBup1	Substitution cloning	ATTCGTGAGAAGGATGTTCC	2316086	2316105	0.00217192	This study
psgRNA-rcsBup2	Substitution cloning	CTGATGTATTTTTCTATTCC	2316126	2316107	0.037747	This study
psgRNA-rcsBup3	Substitution cloning	GTCAAGAGCTTGCTGTAGCA	2316143	2316162	0.198773	This study
psgRNA-rcsB1-27	Typical DNA cloning	GACCATCCGATAGTCTTGTT	2316207	2316226	0.21388	This study
psgRNA-rcsB2-11	Typical DNA cloning	TACCGAACAAGACTATCGGA	2316231	2316212	0.336401	This study
psgRNA-rcsB3-8	Typical DNA cloning	CGAATACCGAACAAGACTAT	2316235	2316216	0.000630167	This study
psgRNA-rcsC3-1	Typical DNA cloning	TGCTCTGAACATGTAGCGCG	2319817	2319836	0.557124	This study
psgRNA-rcsC2-3	Typical DNA cloning	ACATGTAGCGCGAGGCTTTC	2319825	2319844	7.49621e-05	This study
psgRNA-rcsC1-1	Typical DNA cloning	CATGTAGCGCGAGGCTTTCA	2319826	2319845	0.000395018	This study
psgRNA-atoS3-1	Typical DNA cloning	ACGCAATCAAATGATCCTGA	2320078	2320097	0.000392391	This study
psgRNA-atoS1-1	Typical DNA cloning	ATTTGATTGCGTAAGCGGCG	2320089	2320070	0.592968	This study
psgRNA-atoS2-2	Typical DNA cloning	GGATCATTTGATTGCGTAAG	2320094	2320075	0.544222	This study
psgRNA-atoC1-1	Typical DNA cloning	CAAAAGCGGTGCTCAGCATA	2321938	2321919	0.511555	This study
psgRNA-atoC2-2	Typical DNA cloning	GAATCCTTGTAGTGCAAAAG	2321952	2321933	0.606343	This study
psgRNA-atoC3-1	Typical DNA cloning	GAAACACATTGTGCGAACAA	2321953	2321972	1.78191	This study
psgRNA-atoC5-2	Typical DNA cloning	TGCCGATATTCACCCTGATG	2321997	2322016	0.77091	This study
psgRNA-atoC7-2	Typical DNA cloning	TCACCCTGATGTGGTGTTGA	2322006	2322025	0.64593	This study
psgRNA-atoC4-1	Typical DNA cloning	CAGGGTGAATATCGGCAAAC	2322013	2321994	0.820896	This study
psgRNA-atoC6-1	Typical DNA cloning	CACCACATCAGGGTGAATAT	2322021	2322002	0.338153	This study
psgRNA-atoC8-1	Typical DNA cloning	TATCCATCAACACCACATCA	2322031	2322012	0	This study
psgRNA-arnA2-1	Substitution cloning	CGTTTTTGCCTACCACGATA	2368050	2368069	0.16855	This study
psgRNA-arnA1-2	Substitution cloning	ATCGTGGTAGGCAAAAACGA	2368068	2368049	0.000210084	This study
psgRNA-arnA4-2	Substitution cloning	CCTCGGTATTGAAGCCCTGC	2368077	2368096	0.421724	This study
psgRNA-arnA3-2	Substitution cloning	GAGGCATCCCATATCGTGGT	2368080	2368061	0.0664962	This study
psgRNA-ackA4	Substitution cloning	TTAGTACTGGTTCTGAACTG	2413482	2413501	0.00283416	This study
psgRNA-ackA5	Substitution cloning	GCCATCATCGATGCAGTAAA	2413524	2413543	0.112804	This study
psgRNA-ackA6	Substitution cloning	AATGGTGAAGAGTACCTTTC	2413542	2413561	0.00304672	This study
psgRNA-ackA1	Synthetic gene	ACCATTTACTGCATCGATGA	2413547	2413528	0.291501	This study
psgRNA-ackA3	Synthetic gene	AGCACGTATCAAATGGAAAA	2413592	2413611	0.198485	This study
psgRNA-ackA2	Synthetic gene	TGATACGTGCTTCGGGCAGG	2413602	2413583	0.142675	This study
psgRNA-pta1	Synthetic gene	AGACCGACGCTGGTTCCGGT	2414793	2414774	0	This study
psgRNA-pta2	Synthetic gene	ATCCGTGCAATGGAACGCAA	2414816	2414835	0	This study
psgRNA-pta3	Synthetic gene	CCTATCGCTCAGCCGCGTAC	2414861	2414880	0.161278	This study
psgRNA-hisJ3	Substitution cloning	GGCCTTCTCCAGCGCAACTG	2426753	2426734	0.097479	This study
psgRNA-hisJ2	Substitution cloning	GCTATCGCTCTCTCTGGTTC	2426774	2426755	0.048383	This study
psgRNA-dsdX2	Substitution cloning	GTTCAAATTCCACCCGTTTC	2477918	2477937	0.0871231	This study
psgRNA-dsdX1	Substitution cloning	GTGGAATTTGAACTTCACGA	2477930	2477911	0.050542	This study
psgRNA-dsdX3	Substitution cloning	GCAACAGCGCCAGAAACGGG	2477949	2477930	0.00386184	This study
psgRNA-evgA1-4	Typical DNA cloning	AAGGCGGAAGTGCCGTTCAG	2483852	2483871	0.485537	This study
psgRNA-evgA2-7	Typical DNA cloning	AGGCGGAAGTGCCGTTCAGC	2483853	2483872	0.369042	This study
psgRNA-evgA3-9	Typical DNA cloning	CGGAAGTGCCGTTCAGCGGG	2483856	2483875	0.681192	This study
psgRNA-evgA4-4	Typical DNA cloning	AAGTGTTTCCACCCGCTGAA	2483886	2483867	0.867769	This study
psgRNA-evgA5-1	Typical DNA cloning	CCCCGGAGTTAACGGTATCC	2483919	2483938	0.491885	This study
psgRNA-evgS2-13	Typical DNA cloning	GAAGATTACATCGAATATCG	2484440	2484459	0.000373885	This study
psgRNA-evgS1-31	Typical DNA cloning	ATCTTCGTCTGCGAAACTTA	2484445	2484426	0.000182438	This study
psgRNA-evgS3-4	Typical DNA cloning	TGCATACCGATTCGCAGCAA	2484585	2484604	0.444605	This study
psgRNA-ypdA1-2	Typical DNA cloning	TGCTGCTGGCGGTCTTCGAT	2498690	2498709	0.714286	This study
psgRNA-ypdA2-1	Typical DNA cloning	GCTGCTGGCGGTCTTCGATC	2498691	2498710	0.719697	This study
psgRNA-ypdA3-1	Typical DNA cloning	GGATACGGATGAGAAAGAAC	2498755	2498736	0	This study
psgRNA-ypdB1-2	Typical DNA cloning	AGACGAATTCCTGGCACAAC	2500403	2500422	0.120071	This study
psgRNA-ypdB3-5	Typical DNA cloning	TGGCACAACAGGAACTGAGC	2500414	2500433	0.04427	This study
psgRNA-ypdB2-2	Typical DNA cloning	AGCTCAGTTCCTGTTGTGCC	2500434	2500415	0.144867	This study
psgRNA-ypdB4-6	Typical DNA cloning	AATTAAAGAGCACAGCCAGA	2500439	2500458	0.00143537	This study
psgRNA-ypdB5-3	Typical DNA cloning	CACAGCCAGATGGAGATTGT	2500449	2500468	0.395125	This study
psgRNA-ypdB6-1	Typical DNA cloning	AGGTGCCGACAATCTCCATC	2500476	2500457	0.0102837	This study
psgRNA-glk3	Synthetic gene	TCGCAGGCTAAGACCTATTC	2509345	2509326	0.254295	This study
psgRNA-glk2	Synthetic gene	TGCCAGTGGTGAAATCTCGC	2509361	2509342	0.0496584	This study
psgRNA-glk1	Synthetic gene	ACACAGAGCAAGACGTGCGT	2509367	2509386	0	This study
psgRNA-yfeH3	Substitution cloning	TTTCACCTTAACCCTGATCA	2526972	2526991	0.0113484	This study
psgRNA-yfeH4	Substitution cloning	CACCTTAACCCTGATCACGG	2526975	2526994	0.0106536	This study
psgRNA-yfeH7	Substitution cloning	CCTGATCACGGTGGTGTTGC	2526984	2527003	0.778627	This study
psgRNA-yfeH1	Substitution cloning	GGGTTAAGGTGAAAGGATCG	2526985	2526966	0.665188	This study
psgRNA-yfeH2	Substitution cloning	GTGATCAGGGTTAAGGTGAA	2526992	2526973	0.495802	This study
psgRNA-yfeH5	Substitution cloning	CACCACCGTGATCAGGGTTA	2526999	2526980	0.714439	This study
psgRNA-yfeH9	Substitution cloning	GTTGCTGGCCTCTTTCTTTC	2526999	2527018	0.0522193	This study
psgRNA-yfeH6	Substitution cloning	CAGCAACACCACCGTGATCA	2527005	2526986	0.56347	This study
psgRNA-yfeH10	Substitution cloning	GCCTCTTTCTTTCCGGCCAG	2527006	2527025	0.288352	This study
psgRNA-yfeH8	Substitution cloning	CCAGCAACACCACCGTGATC	2527006	2526987	0.154101	This study
psgRNA-yfeH11	Substitution cloning	GCCTCTGGCCGGAAAGAAAG	2527029	2527010	0.403859	This study
psgRNA-yfeH12-2	Substitution cloning	GGGACGAAATCGCCTCTGGC	2527040	2527021	0.107268	This study
psgRNA-yfeH13	Substitution cloning	GAAGGGGACGAAATCGCCTC	2527044	2527025	0.0135804	This study
psgRNA-yfeH14	Substitution cloning	TGGTCAGATTTTCAAAGAAG	2527060	2527041	0.104521	This study
psgRNA-yfeH15	Substitution cloning	GTGGTCAGATTTTCAAAGAA	2527061	2527042	0.306759	This study
psgRNA-crr1	Synthetic gene	TCTGGTTTCCGACGACAAGA	2535860	2535879	0	This study
psgRNA-crr2	Synthetic gene	TCCGACGACAAGAAGGATAC	2535867	2535886	0.0496584	This study
psgRNA-crr3	Synthetic gene	GAGATCATTGCTCCGCTCTC	2535897	2535916	0.0124518	This study
psgRNA-eutG3	Synthetic gene	CCGGGCTCGGTGAGCAGTTG	2569412	2569393	0.161278	This study
psgRNA-eutG6	Substitution cloning	TTTTACCCGTTGCAGATTCA	2569446	2569465	0.114051	This study
psgRNA-eutG5	Substitution cloning	ATCGAACGCCTGAAAGAGCG	2569470	2569489	0.00414355	This study
psgRNA-eutG2	Synthetic gene	CGATACCCTGAATCTGCAAC	2569473	2569454	0.0310551	This study
psgRNA-eutG1	Synthetic gene	TCGATACCCTGAATCTGCAA	2569474	2569455	0	This study
psgRNA-eutG4	Substitution cloning	ATTGCAGACCGCGCTCTTTC	2569500	2569481	0.00341233	This study
psgRNA-eutE3	Synthetic gene	CAGCCAAAGTCGCCCAGCAA	2571627	2571608	0.0310551	This study
psgRNA-eutE2	Synthetic gene	GCAGCCAAAGTCGCCCAGCA	2571628	2571609	0.124072	This study
psgRNA-eutE1	Synthetic gene	ATCTCATGAACGGCGGCGGA	2571663	2571682	0.105468	This study
psgRNA-eutE6	Substitution cloning	TATTGAACAGGTGGTGAAAG	2571737	2571718	0.213129	This study
psgRNA-eutE5	Substitution cloning	TCAACAGGATATTGAACAGG	2571746	2571727	0.00704132	This study
psgRNA-eutE4	Substitution cloning	GAATCAACAGGATATTGAAC	2571749	2571730	0.00446056	This study
psgRNA-eutD3	Synthetic gene	ATATTTACATCAACAAGGTC	2573410	2573391	0	This study
psgRNA-eutD2	Synthetic gene	ACACGTTGGTCTAACGCATC	2573426	2573445	0.0682617	This study
psgRNA-eutD1	Synthetic gene	TCCGGAAAAACCACTCTGGC	2573444	2573463	0.198485	This study
psgRNA-narQ1-2	Typical DNA cloning	CCGTCTCGGCCAGTCTGGCC	2585747	2585766	0.52963	This study
psgRNA-narQ2-1	Typical DNA cloning	CGTCTCGGCCAGTCTGGCCC	2585748	2585767	0.000508986	This study
psgRNA-narQ3-1	Typical DNA cloning	AAAAAAGGCCCGGGCCAGAC	2585778	2585759	0.530767	This study
psgRNA-narQ-13	Typical DNA cloning	ACTCTGCATACGCAGCGATC	2585889	2585870	0.461087	This study
psgRNA-narQ3-41	Typical DNA cloning	GTGGCGATTTCCCTGGCTGG	2586181	2586200	0.372224	This study
psgRNA-narQ5-18	Typical DNA cloning	AATACCGATGCCGCCAGCCA	2586213	2586194	0.322066	This study
psgRNA-narQ4-2	Typical DNA cloning	AAATACCGATGCCGCCAGCC	2586214	2586195	0.614796	This study
psgRNA-narQ6-29	Typical DNA cloning	ACAATGCAAGAGACGGTTTA	2586658	2586677	0.000190723	This study
psgRNA-narQ-35	Typical DNA cloning	GAGTATTAGCTTTCGCTCTG	2587383	2587402	0.346858	This study
psgRNA-glrR3-4	Typical DNA cloning	CCGGGATTGCTGAAACTGCT	2688761	2688742	0.856164	This study
psgRNA-glrR2-5	Typical DNA cloning	TTATTGGTCGATGACGATCC	2688779	2688760	0	This study
psgRNA-glrR1-1	Typical DNA cloning	ATTATTGGTCGATGACGATC	2688780	2688761	0	This study
psgRNA-glrK3-2	Typical DNA cloning	GCTGATTCTGCTGCCCCTGT	2691039	2691020	0.601315	This study
psgRNA-glrK2-1	Typical DNA cloning	ATTACGACAACTGGTAATGC	2691069	2691050	7.96965e-05	This study
psgRNA-glrK1-1	Typical DNA cloning	TCCCCGCTCATTACGACAAC	2691078	2691059	0.655862	This study
psgRNA-rpoE3	Typical DNA cloning	GGTTTCCCGCTATGTGCCGT	2709905	2709886	0.0113608	This study
psgRNA-rpoE2	Typical DNA cloning	GCGCACTACCAGTAAGTTAA	2709929	2709948	0	This study
psgRNA-rpoE1	Typical DNA cloning	CTGGTTGAACGGGTCCAGAA	2709985	2709966	0.233427	This study
psgRNA-grcA2	Substitution cloning	GTTCAGCAGATCGTCGTTAG	2716399	2716418	0.0237436	This study
psgRNA-grcA3	Substitution cloning	ACGATCTGCTGAACTCTTTC	2716412	2716393	0.0364394	This study
psgRNA-grcA1	Substitution cloning	CGTTAGCGGCTTTAGTAATC	2716413	2716432	0.0501377	This study
psgRNA-stpA3-4	Typical DNA cloning	ATTCGCGAGCCATCGCACGG	2798435	2798454	0.000119594	This study
psgRNA-stpA2-5	Typical DNA cloning	TTCGCGAGCCATCGCACGGA	2798436	2798455	0.000571591	This study
psgRNA-stpA1-23	Typical DNA cloning	CATTCGCACCCTCCGTGCGA	2798466	2798447	0.829187	This study
psgRNA-rpoS15	Substitution cloning	CGCGTCCAACACACGCTGTG	2867381	2867400	0.396135	This study
psgRNA-rpoS16	Substitution cloning	GACGCGACTCAGCTTTACCT	2867386	2867367	0.00960219	This study
psgRNA-rpoS12	Substitution cloning	CTGCGATAACAGTTCCTCTT	2867408	2867427	0.490741	This study
psgRNA-rpoS3	Typical DNA cloning	GGGAGCCACACAGCGTGTGT	2867408	2867389	0.0465871	This study
psgRNA-rpoS10	Substitution cloning	TTCGGCCAAATCGTTATCAC	2867426	2867445	0.0124892	This study
psgRNA-rpoS9-1	Substitution cloning	TCGGCCAAATCGTTATCACT	2867427	2867446	0.379328	This study
psgRNA-rpoS14	Substitution cloning	GAAGAGGAACTGTTATCGCA	2867428	2867409	0.00586137	This study
psgRNA-rpoS13	Substitution cloning	CGAAGAGGAACTGTTATCGC	2867429	2867410	0.0194839	This study
psgRNA-rpoS11	Substitution cloning	TGATAACGATTTGGCCGAAG	2867444	2867425	0.229105	This study
psgRNA-rpoS7	Substitution cloning	ACTGGGTTCCTGTTCTACTA	2867444	2867463	0.0151791	This study
psgRNA-rpoS8-1	Substitution cloning	GGAACCCAGTGATAACGATT	2867453	2867434	0.185026	This study
psgRNA-rpoS2	Typical DNA cloning	CGAAAAGGCCTTAGTAGAAC	2867474	2867455	0.070542	This study
psgRNA-rpoS6	Substitution cloning	AGTTGAGGTTTTTGACGAAA	2867489	2867470	0.0832276	This study
psgRNA-rpoS5	Substitution cloning	ATTTGATGAGAACGGAGTTG	2867504	2867485	0.000344448	This study
psgRNA-rpoS1	Typical DNA cloning	GATGCGGAATTTGATGAGAA	2867512	2867493	0.0276222	This study
psgRNA-rpoS4	Substitution cloning	TCATGATTTAAATGAAGATG	2867528	2867509	0.0723249	This study
psgRNA-eno3	Synthetic gene	GGAGGGTGGTTTCGTCGGTA	2907861	2907842	0.0682617	This study
psgRNA-eno2	Synthetic gene	TGTACTTCGGCTTCAACAGT	2907865	2907884	0	This study
psgRNA-eno1	Synthetic gene	GTACTTCGGCTTCAACAGTC	2907866	2907885	0	This study
psgRNA-barA1-2	Typical DNA cloning	ACGCATGATGATTCTGATCC	2915080	2915099	0.000125927	This study
psgRNA-barA3-1	Typical DNA cloning	CTGGCACCGACCGTCCTTAT	2915099	2915118	0.00036991	This study
psgRNA-barA2-2	Typical DNA cloning	CAATAAGGACGGTCGGTGCC	2915120	2915101	0.446008	This study
psgRNA-sdaC2	Substitution cloning	CGAAAGACTCTCGTAGTGCC	2928260	2928279	1.18421	This study
psgRNA-sdaC1	Substitution cloning	GTCTTTCGACGCAATCGTGC	2928267	2928248	0.137178	This study
psgRNA-sdaC3	Substitution cloning	CATGGTGTCTGTCTTGCGCC	2928300	2928281	0.266218	This study
psgRNA-fucO3-1	Substitution cloning	CTGAACGAAACGGCATGGTT	2932995	2932976	0.194171	This study
psgRNA-gltP3	Substitution cloning	CTGAACGAAACGGCATGGTT	2932995	2932976	0.000814279	This study
psgRNA-fucO2	Substitution cloning	TGATTCTGAACGAAACGGCA	2933000	2932981	0.048	This study
psgRNA-gltP2	Substitution cloning	TGATTCTGAACGAAACGGCA	2933000	2932981	0.0052521	This study
psgRNA-fucO1-1	Substitution cloning	CAGAATGATTCTGAACGAAA	2933005	2932986	0	This study
psgRNA-gltP1	Substitution cloning	CAGAATGATTCTGAACGAAA	2933005	2932986	0.0319774	This study
psgRNA-fucI1	Substitution cloning	AAAATCAGCTTACCGAAAAT	2935590	2935609	0.105642	This study
psgRNA-fucI2-2	Substitution cloning	ACCGAAAATTGGTATCCGCC	2935601	2935620	7.49311e-05	This study
psgRNA-fucI3	Substitution cloning	ACCGGGCGGATACCAATTTT	2935624	2935605	0.100168	This study
psgRNA-fucR1	Substitution cloning	GAACCATACCAGCCTGACCA	2939409	2939428	0	This study
psgRNA-fucR2	Substitution cloning	CAGAGAGAGCTTCCGTGGTC	2939443	2939424	0.343554	This study
psgRNA-fucR3	Substitution cloning	CTGTTCAGAGAGAGCTTCCG	2939448	2939429	0.865048	This study
psgRNA-aas1	Substitution cloning	CGCGAACGCGATACAAAACA	2975963	2975982	0.216405	This study
psgRNA-aas4-1	Substitution cloning	TCGCGTTACGGGTGACACCC	2975967	2975948	0.0601375	This study
psgRNA-aas3-1	Substitution cloning	TTGTATCGCGTTCGCGTTAC	2975978	2975959	0.128611	This study
psgRNA-aas2	Substitution cloning	TTTGTATCGCGTTCGCGTTA	2975979	2975960	0.00011888	This study
psgRNA-ygeK3-2	Typical DNA cloning	ATTATCCCATCAATCATAAA	2995034	2995053	0	This study
psgRNA-ygeK2-1	Typical DNA cloning	AGCAGCCGTTTATGATTGAT	2995061	2995042	0.608987	This study
psgRNA-ygeK1-1	Typical DNA cloning	CAGCAGCCGTTTATGATTGA	2995062	2995043	0.212152	This study
psgRNA-fbaA2	Synthetic gene	TTGGAGAACTGAACGATAAC	3071057	3071076	0.0496584	This study
psgRNA-fbaA3	Synthetic gene	GTTATCGTTCAGTTCTCCAA	3071076	3071057	0	This study
psgRNA-fbaA1	Synthetic gene	GTACCGACGCAGTTTACTGC	3071126	3071145	0	This study
psgRNA-pgk3	Synthetic gene	CTGGTACGTTCAGATCCGCA	3072547	3072566	0	This study
psgRNA-pgk2	Synthetic gene	TGACCGATCTGGATCTTGCT	3072606	3072587	0	This study
psgRNA-pgk1	Synthetic gene	ATGACCGATCTGGATCTTGC	3072607	3072588	0.124072	This study
psgRNA-yggF3	Synthetic gene	TTGGCTGCCTGGCCGCAAAC	3076134	3076115	0.086865	This study
psgRNA-yggF6	Substitution cloning	TGTTCCGTAACGCGAAATAA	3076142	3076161	0.00152336	This study
psgRNA-yggF2	Synthetic gene	AACAGGCAGCGTTGGCTGCC	3076145	3076126	0.142675	This study
psgRNA-yggF5	Substitution cloning	CGCGAAATAATGGCCACGCC	3076152	3076171	0.126861	This study
psgRNA-yggF4	Substitution cloning	GCGAAATAATGGCCACGCCA	3076153	3076172	0.0877457	This study
psgRNA-yggF1	Synthetic gene	GTGGCCATTATTTCGCGTTA	3076168	3076149	0.124072	This study
psgRNA-exbD3	Substitution cloning	GCCGTTTATCGACGTGATGT	3151181	3151162	0.126346	This study
psgRNA-exbD2	Substitution cloning	GCATTTCGCCGTTATCGTCG	3151198	3151217	0.256507	This study
psgRNA-exbD1	Substitution cloning	AACGAAAACCTCGACGATAA	3151228	3151209	0.463822	This study
psgRNA-exbB3	Substitution cloning	GCAGACGGACCTTTCCGTCT	3151967	3151948	0.26244	This study
psgRNA-exbB2	Substitution cloning	TGCAGACGGACCTTTCCGTC	3151968	3151949	0.556385	This study
psgRNA-exbB1	Substitution cloning	GGGTAATAATTTAATGCAGA	3151982	3151963	0.0070502	This study
psgRNA-ygiQ3	Substitution cloning	GGTCGCGATCCGGTTGGATC	3161110	3161129	0.336601	This study
psgRNA-ygiQ2	Substitution cloning	GTCGCGATCCGGTTGGATCA	3161111	3161130	0.414677	This study
psgRNA-ygiQ1	Substitution cloning	CTCTATCTCCCTGATCCAAC	3161141	3161122	0.000577421	This study
psgRNA-qseB1-21	Typical DNA cloning	AGCGTCGACTGGTTTACACA	3169903	3169922	0	Miyake et al, 2020 (as the psgRNA-qseB)
psgRNA-qseB2-33	Typical DNA cloning	TGGTTTACACAAGGTCGTCA	3169912	3169931	0.0691282	This study
psgRNA-qseB3-36	Typical DNA cloning	ACAAGGTCGTCAGGGAAAAG	3169920	3169939	0.583637	This study
psgRNA-qseB4-1	Typical DNA cloning	ATCCTGGATTTAACCTTACC	3169972	3169991	0	This study
psgRNA-qseB5-1	Typical DNA cloning	TGCCTGGTAAGGTTAAATCC	3169996	3169977	0	This study
psgRNA-qseC1-37	Typical DNA cloning	TGTCGCCTGGAAACAAACAA	3170573	3170592	0.551258	This study
psgRNA-qseC2-16	Typical DNA cloning	GTTATCCGTTGTTTGTTTCC	3170600	3170581	0.000344144	This study
psgRNA-qseC3-11	Typical DNA cloning	CGATCTCAACGAAATCAACG	3170657	3170676	0.000236599	This study
psgRNA-tolC1	Substitution cloning	AAATTGCTCCCCATTCTTAT	3178121	3178140	0.108022	This study
psgRNA-tolC5	Substitution cloning	CTTATCGGCCTGAGCCTTTC	3178136	3178155	0.00656417	This study
psgRNA-tolC6	Substitution cloning	TTATCGGCCTGAGCCTTTCT	3178137	3178156	0.00834044	This study
psgRNA-tolC2	Substitution cloning	GGCTCAGGCCGATAAGAATG	3178151	3178132	0.180201	This study
psgRNA-tolC3	Substitution cloning	AGGCTCAGGCCGATAAGAAT	3178152	3178133	0.203746	This study
psgRNA-tolC4	Substitution cloning	AAGGCTCAGGCCGATAAGAA	3178153	3178134	0.164328	This study
psgRNA-rpoD5	Substitution cloning	CTGAAACTTCTTGTCACCCG	3213071	3213090	0.0174791	This study
psgRNA-rpoD2	Typical DNA cloning	ACTTCTTGTCACCCGTGGTA	3213076	3213095	0.0605908	This study
psgRNA-rpoD4-2	Substitution cloning	AGAAGTTTCAGCTGTGACTG	3213081	3213062	0.23716	This study
psgRNA-rpoD3	Typical DNA cloning	GTCACCCGTGGTAAGGAGCA	3213083	3213102	0.0380243	This study
psgRNA-rpoD6	Substitution cloning	ATAGCCTTGCTCCTTACCAC	3213109	3213090	0.0271159	This study
psgRNA-sstT1	Substitution cloning	ATGACTACGCAACGTTCACC	3239944	3239963	0.245273	This study
psgRNA-sstT2	Substitution cloning	TGACTACGCAACGTTCACCG	3239945	3239964	0.000913743	This study
psgRNA-sstT3	Substitution cloning	AACGTTCACCGGGGCTATTC	3239954	3239973	0.116959	This study
psgRNA-tdcG3	Substitution cloning	GATATTTTCAAAATTGGGAT	3259634	3259615	0.270344	This study
psgRNA-tdcG2	Substitution cloning	CATTCGATATTTTCAAAATT	3259639	3259620	0.0671053	This study
psgRNA-tdcG1	Substitution cloning	GCATTCGATATTTTCAAAAT	3259640	3259621	0.0442814	This study
psgRNA-tdcD2	Substitution cloning	CAGTTAATAACCAAAACAAC	3263626	3263645	0.0469108	This study
psgRNA-tdcD3	Substitution cloning	GTTGTTTTGGTTATTAACTG	3263645	3263626	0.00171625	This study
psgRNA-tdcD1	Substitution cloning	GAATGAATTTCCGGTTGTTT	3263658	3263639	0.987493	This study
psgRNA-tdcC3	Substitution cloning	GCCAGGACGATTGTTTTGTC	3264966	3264985	0.239857	This study
psgRNA-tdcC1	Substitution cloning	GGACGATTGTTTTGTCTGGC	3264970	3264989	0.558321	This study
psgRNA-tdcC2	Substitution cloning	GCCAGACAAAACAATCGTCC	3264989	3264970	0.00634115	This study
psgRNA-tdcB2	Substitution cloning	ATAATGTCATCAATAGCAAC	3265985	3266004	0.300372	This study
psgRNA-tdcB3	Substitution cloning	TATTGAAGCGAAACAACGAC	3265987	3265968	1.37269	This study
psgRNA-tdcB1	Substitution cloning	GCATATTACATACGATCTGC	3266026	3266007	1.15385	This study
psgRNA-deaD5	Substitution cloning	CCAGATCGTTAAGGGCTTCA	3307788	3307807	0.201838	This study
psgRNA-deaD3	Substitution cloning	TCGTTAAGGGCTTCAAGGAT	3307793	3307812	0.283692	This study
psgRNA-deaD2	Substitution cloning	CTTCAAGGATAGGAGCCTTC	3307803	3307822	0.0186099	This study
psgRNA-deaD6	Substitution cloning	CTTGAAGCCCTTAACGATCT	3307809	3307790	0.0095508	This study
psgRNA-deaD4	Substitution cloning	CCTTGAAGCCCTTAACGATC	3307810	3307791	0.191525	This study
psgRNA-deaD1	Substitution cloning	CAGGCCCAGATCTGCAAAAG	3307822	3307841	0.270343	This study
psgRNA-ispB1-1	Substitution cloning	TGAGTTAACCGCGCAAGATA	3333730	3333749	0	This study
psgRNA-ispB2-1	Substitution cloning	TTAACCGCGCAAGATATGGC	3333734	3333753	0.62377	This study
psgRNA-ispB4-1	Substitution cloning	AGATATGGCGGGTGTTAATG	3333745	3333764	0	This study
psgRNA-ispB3-1	Substitution cloning	AACACCCGCCATATCTTGCG	3333760	3333741	0.000614251	This study
psgRNA-rpoN4	Substitution cloning	TGAAGCAAGGTTTGCAACTC	3344718	3344737	0.331871	This study
psgRNA-rpoN5	Substitution cloning	ACTCAGGCTTAGCCAACAAC	3344734	3344753	0.171496	This study
psgRNA-rpoN1	Typical DNA cloning	GATGACGCCACAGCTCCAAC	3344758	3344777	0.0781059	This study
psgRNA-rpoN6	Substitution cloning	GTGGCGTCATCGCCAGTTGT	3344768	3344749	0.887734	This study
psgRNA-rpoN7-1	Substitution cloning	CGAATTGCCTGTTGGAGCTG	3344787	3344768	0.000153859	This study
psgRNA-rpoN2	Typical DNA cloning	TCTGTTGCAGTTGTCGACGC	3344788	3344807	0.259683	This study
psgRNA-rpoN8-2	Substitution cloning	GCAACAGACGAATTGCCTGT	3344795	3344776	0.29465	This study
psgRNA-rpoN9	Substitution cloning	GTCGACGCTGGAACTTCAGC	3344800	3344819	0.00563368	This study
psgRNA-rpoN3	Typical DNA cloning	GTGTCGATTTGCTCAAGCAG	3344871	3344852	0.0743231	This study
psgRNA-mtgA3	Substitution cloning	CCATTAACCGCAAAAGAAAA	3349749	3349768	0.440134	This study
psgRNA-mtgA2	Substitution cloning	CGAAACTAAACACCGTTAAG	3349776	3349795	0.202062	This study
psgRNA-mtgA1	Substitution cloning	AATGAGTAAAAGCCGCTTAA	3349810	3349791	0	This study
psgRNA-arcB3-1	Typical DNA cloning	CCAGACCTAACTTCATCATC	3352965	3352984	0.000271079	This study
psgRNA-arcB2-1	Typical DNA cloning	CCTGATGATGAAGTTAGGTC	3352987	3352968	0.311147	This study
psgRNA-arcB1-4	Typical DNA cloning	GTTGACCTGATGATGAAGTT	3352992	3352973	0.545455	This study
psgRNA-nanE11-1	Substitution cloning	ACGATTTCGGGTTTATCGAG	3370933	3370952	0.214731	This study
psgRNA-nanE10-2	Substitution cloning	CGATTTCGGGTTTATCGAGC	3370934	3370953	0	This study
psgRNA-nanE8	Substitution cloning	GGTTTATCGAGCGGGCTGTC	3370942	3370961	0.337535	This study
psgRNA-nanE12-1	Substitution cloning	ACCCGAAATCGTCGCCGCCA	3370944	3370925	0.25739	This study
psgRNA-nanE7	Substitution cloning	TCGAGCGGGCTGTCCGGAAC	3370948	3370967	0.238611	This study
psgRNA-nanE6	Substitution cloning	GCGGGCTGTCCGGAACCGGC	3370952	3370971	0.202444	This study
psgRNA-nanE5	Substitution cloning	GCTGTCCGGAACCGGCTGGC	3370956	3370975	0.36872	This study
psgRNA-nanE9-2	Substitution cloning	CCGGCTGGCAGGAGACAATC	3370967	3370986	0.255656	This study
psgRNA-nanE4	Substitution cloning	TGTCTCCTGCCAGCCGGTTC	3370983	3370964	0.0531749	This study
psgRNA-nanE3	Substitution cloning	CCTGATTGTCTCCTGCCAGC	3370989	3370970	0.016592	This study
psgRNA-nanE2	Substitution cloning	CAAAAAATCGCTGCTAACGG	3371012	3370993	0.408163	This study
psgRNA-nanE1	Substitution cloning	GATCAAAAAATCGCTGCTAA	3371015	3370996	0.248353	This study
psgRNA-mdh3	Synthetic gene	GTTCTGAACCTGAAGGCAGT	3384181	3384200	0	This study
psgRNA-mdh2	Synthetic gene	TTCTGAACCTGAAGGCAGTT	3384182	3384201	0.105468	This study
psgRNA-mdh1	Synthetic gene	TTAACAGTAGTGCAAGCGCC	3384208	3384227	0	This study
psgRNA-fis2-28	Typical DNA cloning	CGTTTCTACCGTTAACTCTC	3411306	3411325	0.000434281	This study
psgRNA-fis3-11	Typical DNA cloning	TACCGTTAACTCTCAGGATC	3411312	3411331	0.465346	This study
psgRNA-fis1-19	Typical DNA cloning	CTGAGAGTTAACGGTAGAAA	3411327	3411308	0.367116	This study
psgRNA-crp1-65	Typical DNA cloning	AAACAGACCCGACTCTCGAA	3486139	3486158	0.130141	This study
psgRNA-crp2-9	Typical DNA cloning	ACAAGAACCATTCGAGAGTC	3486168	3486149	1.6927	This study
psgRNA-crp3-40	Typical DNA cloning	GACAAGAACCATTCGAGAGT	3486169	3486150	0.00278873	This study
psgRNA-pck1	Synthetic gene	TTTGACCCCGCAAGAACTCG	3532835	3532854	0	This study
psgRNA-pck2	Synthetic gene	CCATAAGCCTCGAGTTCTTG	3532864	3532845	0	This study
psgRNA-pck3	Synthetic gene	GAGCTCGATCCGAGCCTGAC	3532923	3532942	0.124072	This study
psgRNA-envZ31-1	Substitution cloning	ATGGTTAAAGGCACGGGTAA	3535203	3535222	0.659912	This study
psgRNA-envZ28-1	Substitution cloning	GAAGCGCCATACTCACGCAG	3535237	3535256	0.217749	This study
psgRNA-envZ23-4	Substitution cloning	GCGCCATACTCACGCAGCGG	3535240	3535259	0.811026	This study
psgRNA-envZ30-1	Substitution cloning	GCGTGAGTATGGCGCTTCGG	3535254	3535235	0.6099	This study
psgRNA-envZ29-1	Substitution cloning	GCTGCGTGAGTATGGCGCTT	3535257	3535238	0.55264	This study
psgRNA-envZ21-4	Substitution cloning	GCGTGTTCGAGATCGACCAA	3535294	3535313	0.743997	This study
psgRNA-envZ22-3	Substitution cloning	CAGCCTTGCAGGTTGGTAAA	3535294	3535275	0.418831	This study
psgRNA-envZ20-3	Substitution cloning	TATTGGCGATAGGCGGGGCG	3535363	3535344	0.649403	This study
psgRNA-envZ19-4	Substitution cloning	GCGATTATGCTATTGGCGAT	3535373	3535354	0.975989	This study
psgRNA-envZ18-2	Substitution cloning	TCCGCTGTTCCGCTATACGC	3535395	3535376	0.332813	This study
psgRNA-envZ17-2	Substitution cloning	GCCGCTGACCGAAATTCATC	3535428	3535409	0.148912	This study
psgRNA-envZ16-2	Substitution cloning	CCAGATATTGGGCGACAGCC	3535437	3535456	0.521115	This study
psgRNA-envZ15-2	Substitution cloning	ACAAAAGTTCGCCTGTCGTC	3535489	3535470	0.0119421	This study
psgRNA-envZ14-2	Substitution cloning	GCAGCAACTGGGCGGCCCGA	3535530	3535511	0.42269	This study
psgRNA-envZ13-2	Substitution cloning	CCATCAGATGGCGCAGCAAC	3535542	3535523	0.496383	This study
psgRNA-envZ12-3	Substitution cloning	CCGAAGAGGCAGGTCTGCGT	3535588	3535569	0.0150137	This study
psgRNA-envZ11-2	Substitution cloning	GATCTCTCTCTACTCCAACG	3535614	3535595	0.0393787	This study
psgRNA-envZ9-42	Substitution cloning	ATCTCCCGACGGAAAGCGGG	3535630	3535649	0.000338804	This study
psgRNA-envZ10-2	Substitution cloning	TCGGGAGATCTACCGTGAGC	3535638	3535619	0.00448014	This study
psgRNA-envZ8-3	Substitution cloning	GACAAACTGCAACTGGAGGA	3535691	3535672	0.270801	This study
psgRNA-envZ7-3	Substitution cloning	ACATACGCACTTCGTACGCG	3535700	3535719	0.00959787	This study
psgRNA-envZ6-3	Substitution cloning	CCACCAGATAAGTCGTCACC	3535769	3535788	0.00418922	This study
psgRNA-envZ5-3	Substitution cloning	CACCAGGCTGGCGAACAGCA	3535785	3535804	0.202539	This study
psgRNA-envZ2-5	Typical DNA cloning	TGACGATGAGCAATAACGTA	3535808	3535827	0.00038335	This study
psgRNA-envZ1-1	Typical DNA cloning	GACGATGAGCAATAACGTAC	3535809	3535828	0.247059	Miyake et al., 2020 (as the psgRNA-envZ)
psgRNA-envZ3-2	Typical DNA cloning	CACCTTGCTGTTCGCCAGCC	3535809	3535790	0.622083	This study
psgRNA-envZ4-4	Substitution cloning	GTACGGGCAAATGAACTTCG	3535825	3535844	0	This study
psgRNA-envZ27-1	Substitution cloning	CCTCATGCTTTAGAGCCGTC	3535863	3535882	0.00101056	This study
psgRNA-envZ26-1	Substitution cloning	CCGGACGGCTCTAAAGCATG	3535885	3535866	0.374461	This study
psgRNA-envZ25-1	Substitution cloning	GGCTACGTCTTTGTACCGGA	3535900	3535881	0.602492	This study
psgRNA-envZ24-1	Substitution cloning	TCTGGGCTACGTCTTTGTAC	3535904	3535885	0.0011532	This study
psgRNA-ompR3-10	Typical DNA cloning	CGTCGCTAATGCAGAACAGA	3536486	3536467	0.205733	This study
psgRNA-ompR2-102	Typical DNA cloning	TCGAACCTGGAAGCCTTGTT	3536489	3536508	0.136207	This study
psgRNA-ompR6-23	Typical DNA cloning	TCTCACCGAACAAGGCTTCC	3536516	3536497	0	This study
psgRNA-ompR5-22	Typical DNA cloning	AACGTTCCAGCAGCGCACGC	3536518	3536537	0	Miyake et al, 2020 (as the psgRNA-ompR)
psgRNA-ompR1-31	Typical DNA cloning	GAACGTTATCTCACCGAACA	3536524	3536505	0.491379	This study
psgRNA-ompR4-18	Typical DNA cloning	CATGCGCCTGCGTGCGCTGC	3536546	3536527	1.2069	This study
psgRNA-glpD1	Substitution cloning	ACCAAAGATCTGATTGTGAT	3562019	3562038	0.31071	This study
psgRNA-glpD2	Substitution cloning	CCAAAGATCTGATTGTGATA	3562020	3562039	0.364129	This study
psgRNA-glpD3	Substitution cloning	CCCTATCACAATCAGATCTT	3562042	3562023	0.0250222	This study
psgRNA-rpoH3	Typical DNA cloning	GCTGCATTACCATGGCGATC	3600664	3600645	0.165856	This study
psgRNA-rpoH2	Typical DNA cloning	TAACGCGTGGCCGATGTTGT	3600715	3600696	0.0688101	This study
psgRNA-rpoH6-1	Substitution cloning	CTGCCCGGATGTAGGAATCC	3600717	3600736	0.429293	This study
psgRNA-rpoH5	Substitution cloning	GGAATCCAGGTTGCCAACTG	3600730	3600749	0.00253036	This study
psgRNA-rpoH1	Typical DNA cloning	GCAACCTGGATTCCTACATC	3600743	3600724	0.075188	This study
psgRNA-rpoH4	Substitution cloning	AGTTTAGCTTTAGCCCCAGT	3600765	3600746	0	This study
psgRNA-zntA4-1	Typical DNA cloning	ATGTCGACTCCTGACAATCA	3606451	3606470	0.000652333	This study
psgRNA-nikA2-8	Typical DNA cloning	GCAGCGCAAATAGAGTGCGG	3613703	3613684	0.000417376	This study
psgRNA-nikC1	Substitution cloning	ACTTTTTCCTCTCTTCCCGC	3616186	3616205	0.000973217	This study
psgRNA-nikC2	Substitution cloning	TTTCCTCTCTTCCCGCTGGT	3616190	3616209	0.00093985	This study
psgRNA-nikC3	Substitution cloning	GTACCGACCAGCGGGAAGAG	3616215	3616196	0.685118	This study
psgRNA-nikD2	Substitution cloning	ACTACGTAATATCGCGCTAC	3617032	3617051	0	This study
psgRNA-nikD1	Substitution cloning	TTACGTAGTTCAATCTGTTG	3617040	3617021	0	This study
psgRNA-nikE1	Substitution cloning	ATGACTTTACTTAACATCTC	3617776	3617795	1.02918	This study
psgRNA-nikE2	Substitution cloning	CGCATAGTGATGGGAAAGGC	3617817	3617798	2.13938	This study
psgRNA-nikE3	Substitution cloning	CGTGCGCATAGTGATGGGAA	3617821	3617802	1.29123	This study
psgRNA-nikR1-15	Typical DNA cloning	TGACGATTTACTGGAGACGC	3618614	3618633	0.638474	This study
psgRNA-nikR2-12	Typical DNA cloning	GACAGCCTGAGCCAGCGTCG	3618636	3618655	0.302658	This study
psgRNA-nikR3-16	Typical DNA cloning	TATAACCACGACGCTGGCTC	3618663	3618644	0.0029321	This study
psgRNA-gadX6	Substitution cloning	ATTTCTCCCGATGCTCAAGG	3665628	3665609	0.00152336	This study
psgRNA-gadX5	Substitution cloning	AAATTTTGTATTCGTGTCAA	3665664	3665645	0.0839542	This study
psgRNA-gadX4	Substitution cloning	CACACTTATCTACTCGAATT	3665669	3665688	0.111794	This study
psgRNA-gadX2	Substitution cloning	GCGATATTCACCATTAACCA	3665730	3665749	0.563306	This study
psgRNA-gadX3	Substitution cloning	CTATTTTAATGGCGGTGACC	3665730	3665711	0.522427	This study
psgRNA-gadX1	Substitution cloning	TATATTCTCACCATGGTTAA	3665762	3665743	0.557551	This study
psgRNA-yhjB3-2	Typical DNA cloning	TATTCCAGGAGTGAGTATTC	3671826	3671807	0.000715234	This study
psgRNA-yhjB2-2	Typical DNA cloning	AGTTTACAGCAGCGTATTCC	3671840	3671821	0	This study
psgRNA-yhjB1-1	Typical DNA cloning	AGGCAGTCAATATTTATTCA	3671873	3671854	0.129555	This study
psgRNA-dctA3	Substitution cloning	CTGTCAGGACCTGAAAGTAA	3683402	3683421	0.106686	This study
psgRNA-dctA1	Substitution cloning	GTAAAGGCTTTTAAACAGAG	3683418	3683437	0.0441955	This study
psgRNA-dctA2-1	Substitution cloning	GTTTAAAAGCCTTTACTTTC	3683433	3683414	0.108985	This study
psgRNA-yhjX3-9	Typical DNA cloning	ACCGATGAGTGTCAGCCAGC	3711960	3711979	0.000325351	This study
psgRNA-cspA1-1	Substitution cloning	TACGATACCAGTCATTTTAC	3720075	3720056	0.376149	This study
psgRNA-cspA2-1	Substitution cloning	TTCAACGCTGACAAAGGCTT	3720082	3720101	0.051036	This study
psgRNA-cspA3-1	Substitution cloning	ACATCTTTAGAGCCATCGTC	3720137	3720118	0.380312	This study
psgRNA-cspA4-1	Substitution cloning	TTCTCTGCTATCCAGAACGA	3720148	3720167	0.0892149	This study
psgRNA-cspA6-1	Substitution cloning	GGTTACAAATCTCTGGACGA	3720169	3720188	0	This study
psgRNA-cspA5-2	Substitution cloning	GAGATTTGTAACCATCGTTC	3720181	3720162	2.98614	This study
psgRNA-cspA7-2	Substitution cloning	GTGTCCTTCACCATCGAAAG	3720199	3720218	0.637347	This study
psgRNA-cspA8-2	Substitution cloning	ACCATCGAAAGCGGCGCTAA	3720208	3720227	0.627393	This study
psgRNA-cspA9	Substitution cloning	GGCGCTAAAGGCCCGGCAGC	3720220	3720239	0.286052	This study
psgRNA-cspA10	Substitution cloning	TGGTTACGTTACCAGCTGCC	3720253	3720234	0.0241685	This study
psgRNA-aldB3	Synthetic gene	ACAACTTTATTGGCGGCGAA	3756435	3756416	0.403121	This study
psgRNA-aldB2	Synthetic gene	CAGATTAAGCCCGGCGAGTA	3756487	3756468	0.086865	This study
psgRNA-aldB1	Synthetic gene	CCTTCAGCACAGATTAAGCC	3756496	3756477	0	This study
psgRNA-yiaY3	Synthetic gene	TATGTTAACGAAATTAGGTA	3757708	3757689	0.161278	This study
psgRNA-yiaY6	Substitution cloning	GTCAGTGACAATTAAGGTAC	3757711	3757730	0.0479214	This study
psgRNA-yiaY2	Synthetic gene	ATGAATATGATGGCAGATTA	3757761	3757742	0.217088	This study
psgRNA-yiaY5	Substitution cloning	GACTGATGCAATGAATATGA	3757771	3757752	0.000473278	This study
psgRNA-yiaY1	Synthetic gene	GCGCCGATGACATTCACAGA	3757781	3757800	0.124072	This study
psgRNA-yiaY4	Substitution cloning	ATTCCTTCTGTGAATGTCAT	3757806	3757787	0.00147083	This study
psgRNA-lldD1	Substitution cloning	GGCGCGATAATCGCTGGCTG	3779859	3779840	0.0547635	This study
psgRNA-lldD3	Substitution cloning	CGGCAGAATGCGTTGCGCTG	3779880	3779861	0.443787	This study
psgRNA-gpmM1	Synthetic gene	ACCTATGGTACTGGTGATTC	3785277	3785296	0.0496584	This study
psgRNA-gpmM2	Synthetic gene	ATGGTACTGGTGATTCTGGA	3785281	3785300	0.105468	This study
psgRNA-gpmM3	Synthetic gene	TGGCTATCGCGAAGAACAGC	3785307	3785326	0	This study
psgRNA-uhpB2-3	Typical DNA cloning	GATGCAGGCTGATACTCCAC	3850043	3850062	0.000190921	This study
psgRNA-uhpB1-11	Typical DNA cloning	ACTCCACAGGCAAAACCATG	3850056	3850075	0.000657618	This study
psgRNA-uhpB3-15	Typical DNA cloning	GTGGAGTATCAGCCTGCATC	3850062	3850043	0.00399503	This study
psgRNA-uhpA7	Substitution cloning	CTGGCTTAGCAGCTCCAGAC	3850523	3850542	0.0525855	This study
psgRNA-uhpA6	Substitution cloning	CAGCTCCAGACCGGAGATAT	3850532	3850551	0.0446429	This study
psgRNA-uhpA5	Substitution cloning	AGCTCCAGACCGGAGATATC	3850533	3850552	0.00131303	This study
psgRNA-uhpA4	Substitution cloning	CAGACCGGAGATATCGGGCA	3850538	3850557	0.0640256	This study
psgRNA-uhpA3-49	Typical DNA cloning	GCAGCTGCGCAAAGCCGGAG	3850666	3850685	0.110685	This study
psgRNA-uhpA2-49	Typical DNA cloning	CAAAGCCGGAGCGGACGATG	3850675	3850694	0.177959	This study
psgRNA-uhpA1-43	Typical DNA cloning	GATCACCTCATCGTCCGCTC	3850702	3850683	0	This study
psgRNA-tnaB1	Substitution cloning	AAAAAAAGCACTCTGCATTT	3890252	3890271	0.149144	This study
psgRNA-tnaB2	Substitution cloning	AAAAAAGCACTCTGCATTTT	3890253	3890272	0.155683	This study
psgRNA-tnaB3	Substitution cloning	AAAAAGCACTCTGCATTTTG	3890254	3890273	0.289678	This study
psgRNA-atpD3-1	Typical DNA cloning	GGCTACTGGAAAGATTGTCC	3917373	3917354	0.000749621	This study
psgRNA-atpD2-4	Typical DNA cloning	AGAGGATTTAAGATGGCTAC	3917387	3917368	0.597618	This study
psgRNA-atpD1-6	Typical DNA cloning	ATTTCGTAGAGGATTTAAGA	3917394	3917375	0	Ogawa et al, 2022 (as the psgRNA-atpD)
psgRNA-atpA7-1	Typical DNA cloning	AATCGGCCAGGCCGTGAATG	3919719	3919738	0.525828	This study
psgRNA-atpA8-2	Typical DNA cloning	CGGCCTGGCCGATTGTATGC	3919732	3919713	0.335843	This study
psgRNA-atpA6-1	Typical DNA cloning	GACGGTGTTATCCGCATTCA	3919752	3919733	0.645166	This study
psgRNA-atpA4-3	Typical DNA cloning	GTGAGTGAAGCTCACAACGA	3919794	3919775	0.575409	This study
psgRNA-atpE2-2	Typical DNA cloning	TGTACAGCAGATCCATATTC	3921159	3921178	0	Ogawa et al, 2022 (as the psgRNA-atpE)
psgRNA-atpE1-2	Typical DNA cloning	TGTCATGGAAAACCTGAATA	3921193	3921174	0.296117	This study
psgRNA-kup1-10	Typical DNA cloning	ATTGCCCGCGATTACCCTCG	3931339	3931358	0	This study
psgRNA-kup2-7	Typical DNA cloning	ATCGCCGCGAGGGTAATCGC	3931365	3931346	0.862708	This study
psgRNA-kup3-4	Typical DNA cloning	AATCGCCGCGAGGGTAATCG	3931366	3931347	1.00818	This study
psgRNA-ilvG1	Substitution cloning	CTCCAACATTTCTGAATTAC	3952192	3952173	0	This study
psgRNA-ilvG2	Substitution cloning	AATTATCATGATGCAACATC	3952194	3952213	0.000262084	This study
psgRNA-ilvG3	Substitution cloning	GCAACATCAGGTCAATGTAT	3952206	3952225	0	This study
psgRNA-ilvM1	Substitution cloning	AATCCGCGCCTGAGCGCAAA	3952452	3952471	0.409659	This study
psgRNA-ilvM2	Substitution cloning	ATTCCTTTTGCGCTCAGGCG	3952477	3952458	0	This study
psgRNA-ilvM3	Substitution cloning	TTTATATTCCTTTTGCGCTC	3952482	3952463	0	This study
psgRNA-wecC1	Substitution cloning	TTTGCGACCATTTCTGTTAT	3971266	3971285	0.0141608	This study
psgRNA-wecC2	Substitution cloning	GACCATTTCTGTTATCGGAC	3971271	3971290	0.299425	This study
psgRNA-wecC9-1	Substitution cloning	ACCATTTCTGTTATCGGACT	3971272	3971291	0.143036	This study
psgRNA-wecC3	Substitution cloning	GTTATCGGACTGGGTTATAT	3971281	3971300	0.0262653	This study
psgRNA-wecC11-2	Substitution cloning	TTATCGGACTGGGTTATATC	3971282	3971301	0.000100551	This study
psgRNA-wecC4	Substitution cloning	GGGTTATATCGGGCTGCCAA	3971292	3971311	0.024493	This study
psgRNA-wecC10-2	Substitution cloning	ACCCAGTCCGATAACAGAAA	3971295	3971276	0.189477	This study
psgRNA-wecC6	Substitution cloning	CGGCAGCAGCGTTTGCCTCA	3971312	3971331	0.537397	This study
psgRNA-wecC7	Substitution cloning	GTTTGCCTCACGGCAAAAAC	3971322	3971341	0.341338	This study
psgRNA-wecC12-2	Substitution cloning	TCACGGCAAAAACAGGTAAT	3971329	3971348	8.25955e-05	This study
psgRNA-wecC5	Substitution cloning	GAGGCAAACGCTGCTGCCGT	3971330	3971311	0.459215	This study
psgRNA-wecC8	Substitution cloning	AATTACCTGTTTTTGCCGTG	3971349	3971330	0.0105337	This study
psgRNA-wecE1	Substitution cloning	GATTCCATTTAACGCACCGC	3975148	3975167	0.0141527	This study
psgRNA-wecE9-1	Substitution cloning	TCCATTTAACGCACCGCCGG	3975151	3975170	0.000847133	This study
psgRNA-wecE10-1	Substitution cloning	ATTTAACGCACCGCCGGTGG	3975154	3975173	0.522125	This study
psgRNA-wecE3	Substitution cloning	TTTAACGCACCGCCGGTGGT	3975155	3975174	0.141178	This study
psgRNA-wecE7	Substitution cloning	CGAACTCGACTATATGCAGT	3975181	3975200	0.00862359	This study
psgRNA-wecE4	Substitution cloning	AGTTCGGTTCCCACCACCGG	3975186	3975167	0.0288341	This study
psgRNA-wecE8	Substitution cloning	CGACTATATGCAGTCGGCAA	3975187	3975206	0.353357	This study
psgRNA-wecE11-1	Substitution cloning	GACTATATGCAGTCGGCAAT	3975188	3975207	0.000232429	This study
psgRNA-wecE5	Substitution cloning	TCGAGTTCGGTTCCCACCAC	3975189	3975170	0.176166	This study
psgRNA-wecE12-1	Substitution cloning	ATGCAGTCGGCAATGGGTAG	3975194	3975213	0.303549	This study
psgRNA-wecE6	Substitution cloning	CGACTGCATATAGTCGAGTT	3975202	3975183	0.497772	This study
psgRNA-pldA1-1	Substitution cloning	TCTGCAGGGCTGGTTGTTGC	4004870	4004889	0.00121748	This study
psgRNA-pldA3-1	Substitution cloning	TATGGCAGTATATGCACAAG	4004906	4004925	0.00355142	This study
psgRNA-pldA2-1	Substitution cloning	GCCATAGGCAACATAAACAC	4004911	4004892	0.000340315	This study
psgRNA-pldA4-1	Substitution cloning	AGTATATGCACAAGAGGCAA	4004912	4004931	0.00153412	This study
psgRNA-tatD1	Substitution cloning	GTCTTTCGCAAATTGCGAAC	4023601	4023582	0.281323	This study
psgRNA-tatD2-2	Substitution cloning	CGCACGCTACAACATCATCA	4023623	4023604	0.152003	This study
psgRNA-tatD3-2	Substitution cloning	GTTAATGGGCTACTCATCAC	4023638	4023657	0.0310933	This study
psgRNA-trkH1-1	Typical DNA cloning	CGCGCCATTACCCGAATCGT	4033154	4033173	0.00319095	This study
psgRNA-trkH3-16	Typical DNA cloning	TACCCGAATCGTTGGACTAC	4033162	4033181	0.49988	This study
psgRNA-trkH4-2	Typical DNA cloning	GACCAGTAGTCCAACGATTC	4033186	4033167	0.402086	This study
psgRNA-ntrC7	Substitution cloning	AGCGCCAGCCCGTCCATTCC	4055085	4055104	0.00356746	This study
psgRNA-ntrC6	Substitution cloning	GCCCGTCCATTCCCGGCATA	4055092	4055111	0.0521008	This study
psgRNA-ntrC5	Substitution cloning	CTTTCAGATATCCGTATGCC	4055125	4055106	0.0021584	This study
psgRNA-ntrC4	Substitution cloning	GCTTTCAGATATCCGTATGC	4055126	4055107	0.00190985	This study
psgRNA-ntrC1-10	Typical DNA cloning	GCGCACGTTCAAGCACCCAA	4055212	4055231	0.931818	This study
psgRNA-ntrC3-2	Typical DNA cloning	GCTTGAACGTGCGCTCGCTG	4055225	4055206	0.891026	This study
psgRNA-ntrC2-4	Typical DNA cloning	GTGCTTGAACGTGCGCTCGC	4055227	4055208	0.00302419	This study
psgRNA-ntrB3-3	Typical DNA cloning	GGTTGGCGTAATGGATCGCC	4056240	4056259	0.470534	This study
psgRNA-ntrB2-3	Typical DNA cloning	TTTGTTAATCGATGACAACC	4056280	4056261	7.72568e-05	This study
psgRNA-ntrB1-2	Typical DNA cloning	TACTGTTAATCAGCGAGTTG	4056282	4056301	0.712321	This study
psgRNA-yihX1	Synthetic gene	TATCGACTTTAACCGTGTGC	4075591	4075610	0.198485	This study
psgRNA-yihX2	Synthetic gene	TTAACCGTGTGCTGGGAGCC	4075599	4075618	0.217088	This study
psgRNA-yihX3	Synthetic gene	AATACGCGTTAAATCGCTCC	4075639	4075620	0	This study
psgRNA-cpxA3-1	Typical DNA cloning	CGCCAGCGTCAGCCAGAAGA	4104922	4104941	0.462591	This study
psgRNA-cpxA2-1	Typical DNA cloning	CGCCATCTTCTGGCTGACGC	4104946	4104927	0.244534	This study
psgRNA-cpxA1-9	Typical DNA cloning	CGCGCATCTTCGCCATCTTC	4104956	4104937	0.0865801	This study
psgRNA-cpxR3-8	Typical DNA cloning	TCAACATAATGACAGGCGTC	4105439	4105458	0.032769	This study
psgRNA-cpxR5	Substitution cloning	TGACAGGCGTCTGGTGTGTC	4105448	4105467	0.0426439	This study
psgRNA-cpxR4	Substitution cloning	GTGTCGATACCATTTTTCTT	4105486	4105505	0.115726	This study
psgRNA-cpxR2-12	Typical DNA cloning	GTAATGATGCCGAAGAAAAA	4105517	4105498	0.00163653	This study
psgRNA-cpxR16	Substitution cloning	CAAGCGCCTGTTCCCCATCG	4105556	4105575	0.0168067	This study
psgRNA-cpxR15	Substitution cloning	AAGCGCCTGTTCCCCATCGT	4105557	4105576	0.14681	This study
psgRNA-cpxR17	Substitution cloning	GGAACAGGCGCTTGATCTTC	4105569	4105550	0.0290557	This study
psgRNA-cpxR14	Substitution cloning	TGTTGCCCACGATGGGGAAC	4105584	4105565	0.0964118	This study
psgRNA-cpxR13	Substitution cloning	CGTGATTGTTGCCCACGATG	4105590	4105571	0.0788427	This study
psgRNA-cpxR12	Substitution cloning	ACGTGATTGTTGCCCACGAT	4105591	4105572	0.46746	This study
psgRNA-cpxR11	Substitution cloning	AACGTGATTGTTGCCCACGA	4105592	4105573	0.0711153	This study
psgRNA-cpxR8	Substitution cloning	TCTCGAGCAGCTCCTTTAAT	4105604	4105623	0.00345828	This study
psgRNA-cpxR7	Substitution cloning	CTCGAGCAGCTCCTTTAATA	4105605	4105624	0.0021362	This study
psgRNA-cpxR1-15	Typical DNA cloning	TTAATAGGGAAGTCAGCTCT	4105619	4105638	0.0168701	Miyake et al, 2020 (as the psgRNA-cpxR)
psgRNA-cpxR10	Substitution cloning	AAGGAGCTGCTCGAGATGGA	4105619	4105600	0.531907	This study
psgRNA-cpxR9	Substitution cloning	ATTAAAGGAGCTGCTCGAGA	4105623	4105604	0.00483491	This study
psgRNA-cpxR6	Substitution cloning	AGAGCTGACTTCCCTATTAA	4105638	4105619	0.00351875	This study
psgRNA-pfkA4	Substitution cloning	AAAATCGGTGTGTTGACAAG	4107561	4107580	0.000408499	This study
psgRNA-pfkA5	Substitution cloning	ATCGGTGTGTTGACAAGCGG	4107564	4107583	0.00100166	This study
psgRNA-pfkA6	Substitution cloning	ACAAGCGGCGGTGATGCGCC	4107576	4107595	0.0460886	This study
psgRNA-pfkA2	Synthetic gene	GGCATGAACGCCGCAATTCG	4107597	4107616	0.105468	This study
psgRNA-pfkA1	Synthetic gene	CGAATTGCGGCGTTCATGCC	4107616	4107597	0.198485	This study
psgRNA-pfkA3	Synthetic gene	ACGAACAACCCCGCGAATTG	4107629	4107610	0.086865	This study
psgRNA-cdh1	Substitution cloning	AAAAGCGGGTCTTCTTTTTT	4109935	4109954	0.384289	This study
psgRNA-cdh2	Substitution cloning	GATGATAGTTATCGCCGTTG	4109959	4109978	0.000350179	This study
psgRNA-cdh3-2	Substitution cloning	GTTATCGCCGTTGTGGCTGC	4109966	4109985	0.437024	This study
psgRNA-cdh4-3	Substitution cloning	GCCGTTGTGGCTGCCGGTAT	4109972	4109991	0.353632	This study
psgRNA-tpiA3	Synthetic gene	TGAAGGCAGCCACATCATGC	4111346	4111327	0	This study
psgRNA-tpiA2	Synthetic gene	ATATCGATATACATTTCCGG	4111362	4111381	0	This study
psgRNA-tpiA1	Synthetic gene	AACCTGCGTAAAGAGCTGGC	4111435	4111416	0	This study
psgRNA-glpX2	Synthetic gene	GCCAGCCAGCGCCGCTGATT	4115520	4115539	0.161278	This study
psgRNA-glpX3	Synthetic gene	CGGCGCTGGCTGGCTACAAA	4115533	4115514	0.198485	This study
psgRNA-glpX1	Synthetic gene	TTCCCGCGTCACCGAATCAG	4115553	4115534	0	This study
psgRNA-hslU3-1	Typical DNA cloning	GGTGATAGAGGCATTCGGCT	4120692	4120711	1.08461	This study
psgRNA-hslU2-1	Typical DNA cloning	CCGTTATCGCGCTGAAGAAC	4121391	4121372	0.000277778	This study
psgRNA-hslU1-1	Typical DNA cloning	GGATAAGCACATCATCGGCC	4121709	4121690	0.00133547	This study
psgRNA-hslV5	Typical DNA cloning	GAAAACGATCTTATTGCTAT	4121939	4121920	0.000277778	This study
psgRNA-hslV3-1	Typical DNA cloning	CATCACCGGTAACGGTGACG	4121970	4121951	1.33565	This study
psgRNA-hslV2-1	Typical DNA cloning	TTGGGCAATACCGTAATGAA	4122221	4122202	0.837449	This study
psgRNA-hslV1-1	Typical DNA cloning	AACGGCCATGTGGTCATCGC	4122260	4122241	1.22449	This study
psgRNA-hslV4	Typical DNA cloning	CGTACGCCGTAACGGCCATG	4122270	4122251	0.788169	This study
psgRNA-hupA1-1	Typical DNA cloning	AGCAGAACTGTCCAAAACCC	4200319	4200338	0.724533	This study
psgRNA-hupA2-3	Typical DNA cloning	AACCCAGGCTAAAGCTGCTC	4200334	4200353	0.419776	This study
psgRNA-hupA3-15	Typical DNA cloning	CTCCAGAGCAGCTTTAGCCT	4200358	4200339	0.000712088	This study
psgRNA-zraS1-3	Typical DNA cloning	CTAAAGACTCCTTAGCTAAA	4201945	4201964	1.19485	This study
psgRNA-zraS3-1	Typical DNA cloning	GTTAAGCGCGATCCTCCCCG	4201967	4201986	0.000455274	This study
psgRNA-zraS2-2	Typical DNA cloning	CGCGCTTAACCATTTAGCTA	4201976	4201957	0.860628	This study
psgRNA-zraR2-4	Typical DNA cloning	TGCAGGCTTTACTGCGCGGC	4203381	4203400	0.110224	This study
psgRNA-zraR3-8	Typical DNA cloning	GCAGGCTTTACTGCGCGGCT	4203382	4203401	0.181457	This study
psgRNA-zraR1-5	Typical DNA cloning	AAGCCTGCAAAATAGTGCAG	4203389	4203370	0	This study
psgRNA-purH6-1	Substitution cloning	CTGGGCGAATTCGACGATAC	4207458	4207477	0.0994765	This study
psgRNA-purH4-1	Substitution cloning	CAGAAACACTGAGCAGAGCG	4207487	4207506	0.244829	This study
psgRNA-purH3-1	Substitution cloning	AAACACTGAGCAGAGCGCGG	4207490	4207509	0.0198477	This study
psgRNA-purH2	Substitution cloning	CTGAGCAGAGCGCGGCGGAC	4207495	4207514	0.357555	This study
psgRNA-purH5-2	Substitution cloning	CTCAGTGTTTCTGACAAAGC	4207499	4207480	0.000220788	This study
psgRNA-purH1	Substitution cloning	GACTGGACGACGTTGTTGCA	4207512	4207531	0.778684	This study
psgRNA-pgi4	Substitution cloning	ATCCAACGCAGACCGCTGCC	4233771	4233790	0.00397203	This study
psgRNA-pgi1	Synthetic gene	AACGCAGACCGCTGCCTGGC	4233775	4233794	0.142675	This study
psgRNA-pgi5	Substitution cloning	TGCCAGGCAGCGGTCTGCGT	4233795	4233776	0.092655	This study
psgRNA-pgi2	Synthetic gene	CTGTAGTGCCTGCCAGGCAG	4233805	4233786	0.179882	This study
psgRNA-pgi3	Synthetic gene	GTGTTTCTGTAGTGCCTGCC	4233811	4233792	0.161278	This study
psgRNA-pgi6-2	Substitution cloning	GCCGATCTTTTTGCTAAAGA	4233839	4233858	0.102322	This study
psgRNA-plsBp6	Substitution cloning	ACCGTTAAATCCGATGATTC	4256596	4256577	0	This study
psgRNA-plsBp3	Substitution cloning	TACCGTTAAATCCGATGATT	4256597	4256578	0.568182	This study
psgRNA-plsBp2	Substitution cloning	TTGACGCTCATAATGTAAAA	4256606	4256625	0.572917	This study
psgRNA-plsBp1	Substitution cloning	ATGTAAAAAGGTTCTTTCAA	4256618	4256637	0.589286	This study
psgRNA-plsBp5	Substitution cloning	TCAATGGCCAATAATACCAC	4256634	4256653	0	This study
psgRNA-plsBp4	Substitution cloning	GGTGAATCCAGTGGTATTAT	4256663	4256644	0.151208	This study
psgRNA-soxS3	Substitution cloning	AAAAATCAGGCTATTCAAAG	4277298	4277279	0.134668	This study
psgRNA-soxS1	Substitution cloning	CTACATCAATGTTAAGCGGC	4277305	4277324	0.0217216	This study
psgRNA-soxS2	Substitution cloning	GATGTAGTCGCAAAAAAATC	4277311	4277292	0.0117601	This study
psgRNA-acs12	Substitution cloning	AACGTACCTGATACCTTCTG	4287275	4287256	0.0818141	This study
psgRNA-acs11	Substitution cloning	TAACGTACCTGATACCTTCT	4287276	4287257	0.00279847	This study
psgRNA-acs10	Substitution cloning	TTAACGTACCTGATACCTTC	4287277	4287258	0.00177967	This study
psgRNA-acs9	Substitution cloning	TACATCGCCTCGTACTGCTG	4287289	4287308	0.0253234	This study
psgRNA-acs8	Substitution cloning	ACATCGCCTCGTACTGCTGA	4287290	4287309	0.00122087	This study
psgRNA-acs6	Substitution cloning	CGTACTGCTGAGGGTTTATC	4287299	4287318	0.134153	This study
psgRNA-acs3	Synthetic gene	GCTGAGGGTTTATCAGGCAA	4287305	4287324	0.142675	This study
psgRNA-acs2	Synthetic gene	CAGGCAACGGTCTGCGATGT	4287318	4287337	0.179882	This study
psgRNA-acs7	Substitution cloning	GATAAACCCTCAGCAGTACG	4287318	4287299	0.0354528	This study
psgRNA-acs1	Synthetic gene	CAACGGTCTGCGATGTTGGC	4287322	4287341	0.310105	This study
psgRNA-acs5-2	Substitution cloning	GTCTGCGATGTTGGCAGGAA	4287327	4287346	0.0881312	This study
psgRNA-acs4	Substitution cloning	GAATGGTGTGTTTGTGAATT	4287344	4287363	0.241283	This study
psgRNA-proP1	Substitution cloning	GTGACATCACGAAGGGTAAT	4330548	4330529	1.03921	This study
psgRNA-proP2	Substitution cloning	AATAATGGTGACATCACGAA	4330555	4330536	0.000416389	This study
psgRNA-proP3	Substitution cloning	CAATAATGGTGACATCACGA	4330556	4330537	1.18637	This study
psgRNA-basS3-12	Typical DNA cloning	ACGCCGCATCACCCGCCCGC	4333009	4332990	0.000307902	This study
psgRNA-basS2-28	Typical DNA cloning	TGATCAGCGTCTTCTGGCTA	4333193	4333174	0.484432	This study
psgRNA-basS1-1	Typical DNA cloning	TTGAGCTGATCAGCGTCTTC	4333199	4333180	0.187816	This study
psgRNA-basR2-8	Typical DNA cloning	GCTATCGCACGCGTAGCCTT	4333864	4333883	0.00198476	Miyake et al, 2020 (as the psgRNA-basR)
psgRNA-basR5-4	Typical DNA cloning	CGTGACAACCGCGCGGATGG	4333864	4333845	1.72388	This study
psgRNA-basR4-18	Typical DNA cloning	TAGCGTGACAACCGCGCGGA	4333867	4333848	0.330207	This study
psgRNA-basR3-6	Typical DNA cloning	GCGATAGCGTGACAACCGCG	4333871	4333852	1.16858	This study
psgRNA-basR1-42	Typical DNA cloning	ATTCTGGCGGCGCAAACCGA	4333902	4333883	0	This study
psgRNA-dcuR9-16	Typical DNA cloning	TTTGGCTTTCTCCAGCGTCG	4349915	4349934	0.0200005	This study
psgRNA-dcuR7-4	Typical DNA cloning	GTTCCACAGCATTGAAAGCC	4349940	4349959	0.000850241	This study
psgRNA-dcuR6-5	Typical DNA cloning	TTCCACAGCATTGAAAGCCT	4349941	4349960	0.0276549	This study
psgRNA-dcuR8-1	Typical DNA cloning	CTGTGGAACAGCCTCGACGC	4349948	4349929	0.401173	This study
psgRNA-dcuR3-8	Typical DNA cloning	CTGGGATTTGTGCTACGTAT	4349959	4349978	0.840107	This study
psgRNA-dcuR5-2	Typical DNA cloning	ATCCCAGGCTTTCAATGCTG	4349965	4349946	0.02616	This study
psgRNA-dcuR4-5	Typical DNA cloning	CGATACGTAGCACAAATCCC	4349980	4349961	1.1469	This study
psgRNA-dcuR2-1	Typical DNA cloning	CGATGACGACGCAATGGTCG	4350014	4349995	0.288926	This study
psgRNA-dcuR1-1	Typical DNA cloning	AATTATCGATGACGACGCAA	4350020	4350001	0.000317864	This study
psgRNA-dcuS3-6	Typical DNA cloning	ACTGACCATTAAGATCACTG	4351585	4351604	0.000147964	This study
psgRNA-dcuS1-1	Typical DNA cloning	ACTGTGGTACTCAATTTCAT	4351601	4351620	0.000344771	This study
psgRNA-dcuS2-2	Typical DNA cloning	GAGTACCACAGTGATCTTAA	4351612	4351593	0.183698	This study
psgRNA-epmB2	Substitution cloning	CTTCTCTGGATGGGGTATTT	4375618	4375637	0.0306818	This study
psgRNA-epmB1-1	Substitution cloning	TTCTCTGGATGGGGTATTTA	4375619	4375638	0.102389	This study
psgRNA-epmB3-1	Substitution cloning	ATACCCCATCCAGAGAAGAT	4375635	4375616	0	This study
psgRNA-fbp3	Synthetic gene	GATATCGCGATGGATAATCT	4455490	4455509	0	This study
psgRNA-fbp2	Synthetic gene	TTTGCTGTCGGCAATAAAAC	4455538	4455519	0.254295	This study
psgRNA-fbp1	Synthetic gene	TGAGCTCACTGCTTTGCTGT	4455550	4455531	0	This study
psgRNA-yjgB3	Synthetic gene	GAAGTGCAGGTGGATTACTG	4496116	4496097	0	This study
psgRNA-yjgB2	Synthetic gene	ACAAGATGTTGAAGTGCAGG	4496126	4496107	0	This study
psgRNA-yjgB1	Synthetic gene	GCCACAAGATGTTGAAGTGC	4496129	4496110	0.105468	This study
psgRNA-fecI3	Typical DNA cloning	TTACCCGCAAAAAAGTGTCC	4518088	4518107	0.0042476	This study
psgRNA-fecI2	Typical DNA cloning	ATCACGGCTGGTTGAAAAGC	4518177	4518158	0.0178923	This study
psgRNA-fecI6-1	Substitution cloning	TCGCTTTATGGCACACATCA	4518193	4518174	0.383105	This study
psgRNA-fecI4	Substitution cloning	CTCGAACGTTAAGGAAGCTG	4518194	4518213	6.37495e-05	This study
psgRNA-fecI1	Typical DNA cloning	TTAACGTTCGAGTCGCTTTA	4518205	4518186	0.0372089	This study
psgRNA-yjiY2-6	Typical DNA cloning	GATATTCAAGCACATACCCT	4591265	4591246	0.000288072	This study
psgRNA-ytjC4	Substitution cloning	CAGGTATACCTAGTCCGCCA	4633803	4633822	0.00116066	This study
psgRNA-ytjC1	Synthetic gene	TCCGCCACGGTGAAACGCAG	4633816	4633835	0.124072	This study
psgRNA-ytjC5	Substitution cloning	GCGTTTCACCGTGGCGGACT	4633833	4633814	0.140149	This study
psgRNA-ytjC2	Synthetic gene	GAACGCCGAGCGACGTATTC	4633838	4633857	0.105468	This study
psgRNA-ytjC6	Substitution cloning	TCCACTGCGTTTCACCGTGG	4633839	4633820	0.208674	This study
psgRNA-ytjC3	Synthetic gene	CGGTCAGCGGGCTGTCAGAC	4633884	4633865	0.0310551	This study
psgRNA-rob3	Substitution cloning	GCTACATTGTCGAGCGACAG	4635228	4635247	0.11896	This study
psgRNA-rob1	Substitution cloning	GACCTTCCAGCCAGATTAAA	4635262	4635281	0.0982164	This study
psgRNA-rob2	Substitution cloning	AATCTGGCTGGAAGGTCATC	4635278	4635259	0.013759	This study
psgRNA-creB1-1	Typical DNA cloning	TGGTTAGTGGAAGATGAGCA	4636025	4636044	0.147383	This study
psgRNA-creB2-4	Typical DNA cloning	GGTTAGTGGAAGATGAGCAA	4636026	4636045	0.239358	This study
psgRNA-creB3-1	Typical DNA cloning	GCAAGGGATAGCCGACACGC	4636042	4636061	0.000953592	Miyake et al, 2020 (as the psgRNA-creB)
psgRNA-creC1-1	Typical DNA cloning	TACTGGTGGCGGTGGCAGCC	4636733	4636752	0.319922	This study
psgRNA-creC2-1	Typical DNA cloning	GGTGGCAGCCTGGTTCGTAC	4636743	4636762	0.428816	This study
psgRNA-creC5-9	Typical DNA cloning	TTTGTCAAAGAAGTTAAACC	4636771	4636790	0	This study
psgRNA-creC3-1	Typical DNA cloning	AAAAATGGCCAGTACGAACC	4636773	4636754	0.462318	This study
psgRNA-creC4-2	Typical DNA cloning	TTTAACTTCTTTGACAAAAA	4636788	4636769	0.000144355	This study
psgRNA-arcA3-12	Typical DNA cloning	GTTGCGTTGATGTTCCTGAC	4640084	4640065	2.20073	This study
psgRNA-arcA2-11	Typical DNA cloning	AGCGCGTGAACTGCGCGAGC	4640112	4640093	1.40002	This study
psgRNA-arcA6-6	Typical DNA cloning	GATGTTTTCGAAGCGACAGA	4640222	4640203	0.00384095	This study
psgRNA-arcA5-13	Typical DNA cloning	AAAAGTATTTTCGAAGCGGA	4640249	4640230	1.17699	This study
psgRNA-arcA4-4	Typical DNA cloning	GTTGAAAAGTATTTTCGAAG	4640253	4640234	0	Miyake et al, 2020 (as the psgRNA-arcA)
psgRNA-arcA1-10	Typical DNA cloning	TCTTATCGTTGAAGACGAGT	4640289	4640270	0	This study
aThe method is indicated to construct the plasmid as described in Fig. 2.
bThe sequence of N20 in sgRNA expressed from the plasmid is represent with genome positions refer to MG1655 (GenBank: U00096.3).
cThe ratio of ampicillin- resistant tansformation of MG1655 harboring pCas with the psgRNA plasmid is calculated to psgRNA (the vector).
