# Supplementary material
Source: Research Square preprint supplement (doi:10.21203/rs.3.rs-9685923/v1)
Supplement: Supplementary file 4 [file 88cb9822d13cd9ce864b3b26.xlsx]

## Sheet: Table S5-1
Table S5-1. The mRNA level of genes in W3110, SSA05102, and YMA11623.
Gene	W3110 typeA (TPM)			SSA05102 (TPM)			YMA11623 (TPM)
	Experiment #1	Experiment #2		Experiment #1	Experiment #2		Experiment #1	Experiment #2
3'ETS-leuZ	284.09	206.27		223.64	223.79		157.14	279.16
aaaD	0.7	0.73		0.21	0.29		1.41	1.27
aaaE	0.52	0.41		0.72	0.33		1.58	0.78
aaeA	6.07	5.29		4.28	2.82		9.75	5.98
aaeB	3.45	3.16		2.18	3.31		11	4.53
aaeR	28.98	28.64		19.48	19.25		26.87	26.71
aaeX	22.91	27.29		14.75	13.76		24.54	32.26
aas	40.49	44.25		27.56	24.22		30.63	36.16
aat	19.35	16.92		22.22	21.31		28.22	29.16
abgA	0.06	0		0.03	0.08		0.05	0
abgB	0	0		0	0		0.13	0
abgR	12.35	12.81		14.42	13.9		15.75	23.84
abgT	0	0		0	0		0	0
abpA	15.61	16.02		12.36	14.58		52.37	39.92
abpB	11.47	9.78		7.81	8.79		59.29	28.7
abrB	9.57	8.01		5.17	4.23		6.18	7.23
accA	199.46	215.75		191.21	207.53		143.41	201.72
accB	457.63	475.93		712.73	789.26		401.43	422.39
accC	388.55	404.62		685.16	722.1		335.52	372.52
accD	618.45	601.53		627.76	634.95		682.07	643.97
aceA	984	910.03		182.63	194.64		558.75	1142.27
aceB	542.67	560.5		138.8	144.58		335.68	576.23
aceE	371.68	390.68		2165.79	2249		1514.93	281.08
aceF	197.98	235.79		971.02	1043.95		409.46	127.12
aceK	102.58	101.4		18.9	21.24		80.37	137.18
aceK-int	169.58	159.79		35.14	35.35		118.99	197.58
ackA	373.98	420.13		1029.03	1085.62		565.72	183.92
acnA	66.54	73.27		65.98	73.52		561.27	405.06
acnB	755.17	735.95		498.84	508.8		778.01	1588.71
acpH	16.36	17.17		14.36	12.8		27.76	28.59
acpP	6065.62	6076.82		6157.41	5769.66		2754.89	4030.74
acpS	68.13	63.48		34.46	40.28		57.22	69.45
acpT	33.81	40.47		25.32	25.76		32.89	40.02
acrA	122.23	126.72		153.56	180.38		153.92	146.82
acrB	106.18	110.72		131.45	150.91		122.09	112.4
acrD	3.64	2.88		2.88	2.76		14.85	4.87
acrE	0.96	1.41		1.06	1.37		1.63	1.51
acrF	2.69	2.85		2.26	2.6		2.86	3.54
acrR	44.82	41.89		35.28	36.32		42.55	53.55
acrZ	24.82	22.98		18.05	12.23		10.89	22.01
acs	22.34	27.02		17.51	19.45		272.96	609.26
actP	14.36	18.22		4.95	5.7		200.92	214.85
actS	74.25	72.64		45.16	46.77		84.87	73.18
ada	11.94	10.19		9.66	10.63		55.88	29.34
add	283.32	276.33		199.75	190.5		108.77	134.52
adeD	27.99	24.87		15.61	16.95		10.7	8.89
adeP	17.96	16.17		19.96	24.42		93.11	21.62
adeQ	0.76	0.76		0.43	0.28		1.91	1.75
adhE	434.18	368.45		587.94	551.3		2434.35	1210.43
adhP	26.58	23.06		24.21	19.36		107.29	121.66
adiA	3.28	3.54		2.61	4.06		5.96	4.44
adiC	1.36	1.13		1.17	1.26		4.36	2.45
adiY	3.59	3.32		3.36	2.13		22.15	1.89
adk	377.33	396.04		549.21	570.91		532.97	319.9
aegA	4.12	3.89		1.8	2.36		4.96	5.09
aer	233.88	279.29		237.22	225.25		130.11	232.62
aes	8.48	7.63		7.43	6.09		15.62	15.1
afuB	0.57	0.93		1.85	0.93		1.6	1.82
afuC	2.5	2.12		1.89	1.92		3.22	2.74
agaA	12.41	11.21		5.24	4.11		14.98	22.52
agaB	1	1.71		1.08	0.53		3.34	3.35
agaC	0.89	0.61		0.16	0.31		2.96	2.56
agaD	1.02	1.57		0.92	0.59		3.97	3.12
agaI	0.6	1.75		0.74	0.76		3.12	3.88
agaR	80.25	75.88		57.59	52.44		58.04	71.54
agaS	6	4.8		2.59	2.77		5.21	7.23
agaV	27.53	21.77		9.02	8.39		17.5	43.32
agaW	23.1	19.33		7.64	5.86		16.31	31.28
agp	52.51	50.15		36.87	39.03		445.24	133.65
agrA	18.35	20.89		15.72	24.14		19.17	16.53
agrB	0	3.98		1.05	0.88		4.04	2.67
ahpC	3262.42	3271.05		4012.86	3772.23		1287.91	5015.39
ahpF	241.14	254.76		229.25	230.11		181.93	242.66
ahr	15.12	12.58		15.78	14.38		71.77	58.7
aidB	3.28	2.9		2.78	2.08		6.08	7.77
ais	1.02	0.91		0.75	0.84		3.94	2.18
alaA	59.64	59.79		119.61	118.65		100.01	147.02
alaC	21.93	22.17		14.39	15.52		33.22	32.76
alaE	44.7	34.22		8.45	12.87		177.7	38.39
alaS	353.87	377.76		305.53	324		371.16	467.89
alaT	42.47	45.35		63.9	89.49		125.46	100.42
alaU	47.16	43.47		54.85	85.7		154.04	120.56
alaV	43.51	42.67		67.29	91.62		155.95	127.75
alaW	29.18	37.84		22.05	23.67		68.58	50.35
alaX	25.53	43.74		24.88	28.41		87.09	73.95
aldA	157.53	187.49		299	316.47		351.73	804.59
aldB	2.7	3.15		3.46	2.81		33.06	29.01
alkA	8.16	9.3		7.8	6.21		11.33	16.17
alkB	5.6	2.57		3.8	3.45		25.01	13
allA	5	4.35		2.4	2.53		2.44	2.08
allB	2.01	2.43		1.47	1.14		3.9	4.03
allC	5.38	5.91		2.63	3.09		4.85	6.25
allD	0.75	0.47		0.41	0.39		2.29	1.42
allE	10.98	13.75		9.16	8.54		11.79	11.77
allR	38.8	33.98		29.57	27.4		28.43	31.26
allS	1.9	1.17		0.76	0.54		1.36	1.72
allZ	23.34	16.55		15.45	16.28		19.95	18.86
alpA	1.67	3.06		0.1	0.17		8.74	6.16
alr	45.15	44.49		32.81	35.24		45.37	43.09
alsA	1.81	3.37		1.84	1.97		2.16	3.37
alsB	10.62	13.75		7.12	7.42		7.62	19.16
alsC	2.93	2.95		1.77	2.04		2.53	3.63
alsE	5.86	4.42		1.88	3.08		4.4	4.24
alsK	6.11	6.47		3.33	3.64		5.12	8.21
alsR	55.82	61.98		38.42	35.18		22.49	46.9
alx	11.77	18.37		29.36	34.09		11.43	10.1
amiA	75.99	67.86		77.85	80.1		141.25	96.27
amiB	23.16	20.96		17.39	19.5		36.68	27.28
amiC	75.44	76.78		38.47	41.45		69.8	55.35
amiD	54.11	52.17		40.05	36.33		99.74	84.94
amn	151.81	143.82		106.99	95.54		71.22	100.06
ampC	8.31	7.8		10.93	9.85		9.25	7.48
ampD	67.47	64.39		33.28	35.66		22.86	24.24
ampE	51.36	55.12		31.21	25.17		23.56	24.68
ampG	35.21	36.38		54.49	60.61		65.98	49.44
ampH	30.64	35.71		28.78	27.45		23.1	36.39
amtB	3.4	2.5		1.92	2.73		4.02	3.13
amyA	50.48	50.89		46.77	53.59		109.38	93.01
anmK	20.05	21.83		13.96	12.09		7.83	8.23
ansA	40.44	38.5		50.52	57.09		47.39	49.07
ansB	6.62	9.19		2.85	2.35		6.86	4.05
ansP	9.23	7.9		19.7	24.34		10.62	7.38
apaG	60.19	63.39		80.04	76.54		147.3	118.76
apaH	30.82	28.88		34.61	36.37		79.4	56.42
aphA	445.44	482.87		140.45	138.75		67.58	240.02
appA	4.97	4.4		3.49	4.68		11.29	6.33
appB	3.26	3.59		2	2.58		12.08	6.15
appC	2.26	1.43		0.9	0.84		5.41	1.94
appX	10.01	10.09		8.78	7.93		21.8	12.23
appY	1.69	1.9		0.11	0.38		59.35	2.04
apt	33.47	34.43		128.77	158.31		68.83	105.14
aqpZ	1.54	4.45		1.42	1.91		7.91	8.36
araA	5.2	5.09		3.33	2.77		7.22	8.6
araB	2.69	2.29		1.68	1.41		3.93	4.05
araC	74.94	81.2		50.45	39.53		30.87	50.5
araD	1.85	2.11		0.96	1.19		5.56	3.83
araE	7.65	6.97		5.15	4.21		11.4	10.22
araF	6.64	5.97		3.52	2.78		7.35	7.82
araG	3.22	3.65		2.28	2.36		4.41	3.94
araH	3.33	2.42		2.16	2.59		4.21	3.79
araJ	6.78	7.04		5.58	5.36		10.19	9.01
arcA	710.7	682.85		604.94	609.46		346.41	549.76
arcB	85.21	81.29		12.35	10.97		67.93	70.32
arcZ	87.05	68.93		17.23	8.77		39.49	52.77
arfA	45.75	39.76		21.98	26.13		91.33	82.08
arfB	49.38	47.05		29.31	31.22		60.58	68.34
argA	12.62	11.57		7.69	7.59		22.16	18.14
argB	13.71	11		7.41	6.09		14.24	14.69
argC	14.58	11.34		8.36	6.14		9.34	7.25
argD	5.87	4.79		6.92	6.13		8.9	5.15
argE	74.83	73.82		41.78	35.33		28.4	47.76
argF	3.25	3		2.35	2.43		2.76	1.96
argG	31.56	28.8		23.58	24.08		97.08	75.09
argH	19.66	16.12		11.68	11.16		19.66	22.42
argI	5.42	5.97		2.05	2.18		3.19	3.46
argK	2.92	3.24		1.14	1.32		4.94	5.16
argL	4.33	2.12		5.82	4.5		5.6	5.47
argO	17.53	13.95		8.68	11.2		46.73	14.82
argP	144.53	124.23		94.51	93.38		70.82	106.64
argQ	137.83	171.09		172.46	183.2		568.94	577.63
argR	138.39	117.25		147.9	154.33		183.83	131.11
argS	45.99	47.37		82.07	101.21		113.99	41.48
argT	42.63	54.7		111.2	114.48		426.57	808.55
argU	9	9		4.74	2.8		6.98	10.79
argV	996.17	1008.55		1098.92	1208.77		2637.6	2526.07
argW	4.75	2.18		4.3	0.48		13.24	9.91
argX	190.8	178.51		237.48	234.6		400.78	446.71
argY	725.14	728.6		818.75	920.65		2155.7	2001.26
argZ	368.74	366.82		392.91	479.02		1152.12	1130.56
ariR	8.53	10.46		6.36	8.22		28.74	15.32
arnA	6.48	6.23		3.02	3.45		47.03	18.69
arnB	3.86	3.86		2.34	2.28		38.1	19.41
arnC	3.06	3.54		2.93	3.01		35.8	17.33
arnD	2.62	2.56		0.92	2.91		23.26	13.11
arnE	6.36	5.28		3.52	3.27		19.64	18.87
arnF	37.66	39.26		19.99	17.43		21.86	41.19
arnT	2.05	1.83		1.69	1.74		11.54	9.07
aroA	37.43	38.07		37.22	41.55		38.68	54.38
aroB	158.78	171.44		167.58	195.7		264.6	181.76
aroC	121.21	120.99		140.99	142.15		258.03	217.83
aroD	44.14	42.4		37.2	31.01		15.34	30.42
aroE	17	13.82		16.82	20.01		27.76	20.59
aroF	38.88	38.18		32.6	32.56		62.57	51.19
aroG	242.15	229.62		143.74	149.95		101.95	160.82
aroH	23.15	27.41		43.32	54.97		61.62	30.58
aroK	281.86	279.37		304.57	353.4		361.69	236.68
aroL	94.55	102.94		76.78	89.24		88.17	102.71
aroM	21.93	17.72		21.61	25.87		83.13	54.38
aroP	29.2	29.08		31.75	31.22		29.23	21.66
arpA	2.11	2.79		0.82	1.04		4.05	4.27
arpB	0.19	0.13		0.27	0.28		1.22	0.48
arrS	1.13	7.57		0.61	2.06		16.55	1.87
arsB	2.49	3.1		1.93	2.01		4.06	3
arsC	10.27	11.35		6.76	7.48		10	10.68
arsR	4.42	4.44		3.76	3.2		5.55	2.53
artI	122.69	108.93		160.6	181.72		670.45	546.17
artJ	16.5	18.39		21.19	23.94		44.82	33.22
artM	45.99	38.41		70.69	86.06		407.22	250.28
artP	67.93	54.63		85.74	104.84		266.34	265.82
artQ	50.67	40.76		72.61	80.08		411.28	259.17
ascB	8.8	8.62		4.89	5.32		12.28	10.8
ascF	7.43	7.22		4.21	4.33		8.6	12.12
ascG	16.37	15.57		10.67	9.57		11.95	13.02
asd	246.14	229.54		209.93	187.17		94.37	236.83
aslA	3.11	2.98		2.52	1.83		3.47	4.81
aslB	5.19	5.74		3.51	2.53		2.91	4.56
asmA	40.22	45.33		38.33	35.88		90.03	69.35
asnA	9.05	9.98		6.41	7.27		6.64	6.5
asnB	66.38	64.7		67.11	62.22		30.29	65.61
asnC	14.24	18.13		14.04	15.64		10.14	17.15
asnS	215.18	205.22		296.13	314.39		412.05	306.7
asnT	49.5	37.3		40.15	35.51		42.46	105.02
asnU	5.99	3.49		1.13	4.73		8.89	4.6
asnV	0.78	3.22		0.28	0.95		10.07	5.18
asnW	2.08	2.68		2.26	3.79		6.26	4.32
aspA	297.71	301.97		269.8	258.24		134.71	261.73
aspC	74.35	76.95		78.95	79.1		107.64	193.44
aspS	124.48	117.04		161.63	171.36		134.39	101.71
aspT	16.97	16.86		24.28	31.31		43.43	20.07
aspU	5.4	2.65		3.07	2.34		5.37	1.7
aspV	12.86	7.95		15.07	11.92		23.1	32.94
aspX	177.15	188.9		140.46	132.95		82.67	132.23
asr	4.42	6.01		1.11	1.28		10.91	9.91
astA	4.67	4.87		3.8	3.72		256.56	526.42
astB	7.09	8.07		2.33	1.83		242.27	297.17
astC	5.06	5.91		4.7	6.44		326.27	749
astD	7.64	8.95		3.3	2.75		261.28	401.93
astE	3.35	6.31		0.69	0.67		179.67	176.65
atoA	0.46	0.38		0	0.3		1.37	1.28
atoB	0.94	1.26		0.65	0.85		2.6	2.44
atoC	5.7	6.58		3.27	3.79		6.3	8.11
atoD	1.31	1.2		0.39	0.9		2.15	2.21
atoE	0.67	0.62		0.13	0.29		3	1.82
atoS	6.25	6.33		2.27	1.75		9.03	10.8
atpA	1527.12	1615.63		2032.82	2083.1		892.36	1665.08
atpB	692.68	742.89		1003.29	1055.73		867.31	742.25
atpC	1796.89	1825.55		2131.48	2054.48		386.94	1583.02
atpD	1631.98	1675.42		1894.16	1902.47		461.33	1615.11
atpE	1453.64	1602.5		1928.03	1987.87		1580.17	1918.84
atpF	2104.21	2296.54		2983.99	2928.49		1637.37	2283.56
atpG	997.47	1062.7		1222.51	1284.25		437.88	1130.79
atpH	1498.34	1608.33		2044.67	2036.38		1100.12	1649.65
atpI	231.62	272.34		295.86	326.41		317.05	268.72
avtA	67.23	70.65		114.43	121.36		72.34	109.86
azoR	46.56	37.49		39.61	33.43		20.45	49
azuC	1.59	2.11		0.99	0.83		4.75	3.27
bacA	50.87	57.14		40.47	48.35		69.75	55.49
baeR	29.19	26.06		23.75	25.41		11.33	11.04
baeS	3.47	2.69		2.2	1.9		5.57	7.41
bamA	303.26	310.75		205.36	218.74		196.82	256.55
bamB	109.01	113.09		83.89	94.92		186.1	144.52
bamC	468.77	485.97		338.36	351.19		528.09	463.39
bamD	371.88	371.5		347.73	334.59		335.48	462.88
bamE	482.49	467.62		328.65	310.82		233.81	302.94
barA	16.6	14.02		1.7	1.4		51.08	31.73
basR	27.64	22.98		22.58	19.07		14.96	15.72
basS	14.74	10.7		5.02	3.41		9.19	7.23
bax	254.66	269.84		199.58	206.86		290	302.08
baxL	151.8	178.25		179.06	197.92		275.02	449.49
bcp	490.54	496.54		415.88	400.49		305.69	416.45
bcr	42.09	39.38		38.27	44.67		127.89	84.57
bcsA	2.04	2.62		2.04	2.43		8.31	4.48
bcsB	4.17	4.34		3.98	3.84		13.34	7.93
bcsC	4.98	5.42		3.48	4.86		7.54	9.5
bcsE	35.98	35.2		25.77	26.02		45.1	48.32
bcsF	21.66	22.73		17.35	23.33		40.4	38.95
bcsG	14.43	16.92		17.74	15.71		37.74	25.1
bcsQ	1.74	3.28		1.94	2.39		10.88	7.99
bcsZ	1.7	2.28		1.88	2.45		5.01	4.23
bdcA	8.49	6.66		6.44	5.72		5.21	7.44
bdcR	28.17	31.14		18.34	15.9		11.21	19.51
bdm	2.57	0.76		5.27	1.92		6.42	6.07
beeE	1.88	0.3		0.68	0.42		2.4	1.15
bepA	64	62.04		34.56	33.06		57.3	72.98
betA	59.12	69.94		54.39	61.9		211.42	176.57
betB	105.48	124.99		122.3	128.18		383.9	394.36
betI	136.11	157.22		203.76	188.71		471.58	604.77
betT	16.92	21.72		61.33	58.97		200.38	177.71
bfd	52.29	48.63		32.84	24.08		8.38	74.8
bfr	73.18	59.6		65.99	65.26		777.75	345.15
bglA	60.94	53.9		47.26	48.97		31.67	44.99
bglB	2.42	1.49		0.97	1.34		2.18	2.88
bglF	9.14	9.34		5.58	6.18		6.61	13.03
bglG	1.28	1.9		1.13	0.99		1.58	2.85
bglH	1.91	0.74		0.16	1.05		1.41	2.1
bglJ	2.66	2.62		7.07	5.76		3.11	58.99
bglX	41.22	41.14		38.36	41.26		59.84	50.81
bhsA	5.5	3.27		14.52	12.81		10.5	3.42
bhsB	3.3	2.31		12.96	11.28		2.9	2.04
bidA	9.79	10.34		7.9	7.13		9.09	11.03
bioA	3.93	3.86		5.4	6.14		8.19	6.54
bioB	2.81	1.92		1.86	1.83		3.4	3.78
bioC	3.38	2.24		2.79	2.55		2.46	5.12
bioD	5.17	4.12		3.55	3.24		3.08	8.74
bioF	1.65	1.66		2.08	2.38		3.21	5.87
bioH	33.92	30.23		21.35	23.06		17.2	16.22
bioP	3.81	3.69		4.63	3.8		5.65	4.15
bipA	195.13	205.72		446.99	472.99		772.09	318.51
birA	13.06	14.04		14.39	13.34		17.43	8.4
bisC	17.44	18.45		15.55	14.45		20.65	18.75
blc	35.22	31.97		17.83	16.21		109.93	158.8
blr	69.77	62.8		18.42	21.13		34.8	25.34
bluF	7.06	6.97		13.51	14.87		40.14	46.33
bluR	62	56.95		47.44	45.82		62.84	83.47
bolA	557.51	530.61		231.76	208.33		668.52	706.9
borD	86	70.48		1.22	0.22		0.8	1.17
brnQ	36.4	35.84		62.9	66.56		66.38	39.89
bsmA	407.16	421.9		326.54	296.38		214.24	323.43
bssR	2.68	0.32		1.01	0.75		24.4	7.52
bssS	381.25	344.53		130.19	123.62		174.72	132.49
btsR	26.51	26.57		3.91	4.1		23.84	27.52
btsS	12.58	11.79		1.52	1.76		16.48	17.63
btsT	933.55	936.75		1.74	1.89		3.04	3.38
btuB	23.85	23.55		17.29	21.31		15.27	17.86
btuC	19.68	16.78		13.58	16.38		12.55	18.55
btuD	28.56	29.56		30.11	32.82		111.03	119.25
btuE	56.53	48.99		56.68	55.57		173	194.55
btuF	20.54	18.25		27.9	27.67		35.2	26.24
btuR	85.93	92.89		72.64	77.18		23.55	52.28
C0293	7.42	5.66		6.27	3.5		17.81	13.06
cadA	1.2	1.23		0.86	1.29		2.77	1.9
cadB	0.47	0.23		0.32	0.19		1.3	0.66
cadC	8.05	6.84		6.84	7.44		7.07	3.95
caiA	10.45	8.81		7.05	6.82		10.08	6.87
caiB	6.06	5.09		3.48	3.87		8.59	5.87
caiC	4.78	4.08		2.45	3.71		14.08	2.84
caiD	0.93	0.21		0.11	0.09		1.71	0.72
caiE	2.91	2.28		0.87	0.94		6.23	2.59
caiF	24.8	23.79		10.2	7.32		46.07	9.39
caiT	0.46	0.85		0.5	0.39		1.01	1.59
can	362.31	374.83		401.45	411.47		255.2	425.53
carA	21.23	27.4		31.72	38.3		1171.21	35.66
carB	36.05	39.95		28.98	33.45		947.58	52.2
cas1	5.76	6.33		2.41	4.25		22.24	13.96
cas2	6.74	9.23		3.62	4.1		23.15	14.27
cas3	2.58	1.79		1.61	0.86		4.59	3.85
casA	1.27	1.31		0.51	0.47		4.39	2.45
casB	4.96	6.42		2.49	2.2		12.08	7.33
casC	5.91	5.36		2.68	2.19		19.72	10.69
casD	4.69	5.23		1.53	3.09		21.54	9.3
casE	7.06	8.67		3.19	4.41		25.23	12.1
cbeA	4.72	4.75		1.98	2.39		3.2	2.25
cbl	3.56	4.44		2.98	3.12		8.3	5.22
cbpA	81.52	68.66		50.81	48.14		107.75	106.87
cbpM	61.08	58.85		41.57	39.16		113.42	94.11
cbrA	1.06	1.28		0.81	1		1.28	1.52
cbrB	6.52	5.75		2.25	2.88		6.05	7.52
cbrC	9.87	7.94		4.46	3.95		4.75	3.53
cbtA	2.06	2.56		1.43	0.53		2.65	1.98
cca	74.88	73.05		59.29	58.52		103.75	127.9
ccmA	20.4	20.52		13.02	9.89		21.28	22.71
ccmB	4.48	4.92		3.89	3.72		8.39	8.97
ccmC	9.2	8.51		7.16	10.53		23.49	14.22
ccmD	9.62	9.81		10.33	9.51		25.21	12.5
ccmE	8.87	8.45		8.73	9.48		26.89	12.85
ccmF	2.27	2.35		2.23	2.39		7.54	3.8
ccmG	6.07	5.7		3.62	5.13		13.31	13.25
ccmH	11.15	8		8.57	8.44		17.17	16.7
ccp	2.97	2.57		0.92	0.98		4.41	4.69
cdaR	18.4	24.83		14.88	12.93		6.02	14.37
cdd	232.41	229.21		243.28	198.79		90.31	49.52
cdgI	0.24	0.22		0.29	0.2		6.73	1.26
cdh	28	28.89		16.54	18.35		17.54	16.26
cdsA	61.64	70.16		63.54	68.53		75.05	49.9
cecR	62.32	58.08		68.27	62.84		52.79	59.81
cedA	14.18	15.27		13.09	11.99		18.73	11.34
cfa	62.11	59.97		54.36	62.2		255.01	119.94
chaA	84.23	81.94		144.89	119.52		25.62	18.99
chaB	18.34	18.89		9.12	11.37		101.18	80.46
chaC	11.98	12.89		13.92	11.92		55.13	44.99
chbA	30.52	26.15		13.41	13.99		15.14	8.97
chbB	85.31	98.35		61.25	53.64		37.18	44.69
chbC	4.88	5.31		3.23	2.61		5.1	2.99
chbF	3.69	2.77		1.7	1.84		2.94	2.63
chbG	10.67	11.69		4.93	5.81		12.91	11.08
chbR	15.76	13.93		5.38	8.05		8.42	8.02
cheA	601.26	586.3		204.72	207.45		390.24	334.51
cheB	51.03	54.34		42.54	38.69		29.9	28.66
cheR	144.83	133.21		108.16	98.99		117.26	121.7
cheW	843.73	832.13		422.8	385.87		462.43	509.06
cheY	257.75	283.47		196.8	180.34		73.14	62.63
cheZ	186.95	199.13		144.28	133.7		46.92	36.11
chiA	8.7	6.89		3.32	4.46		9.75	6.35
chiP	7.89	8.73		8.2	7.61		2.43	5.8
chiQ	7.51	8.48		4.27	5.34		6.96	6.02
chiX	8.72	8.74		4.09	8.35		6.16	24.21
chiZ	22.02	20.39		28.94	25.89		5.07	20.31
cho	11.86	10.22		11.2	9.97		11.44	9.58
chpB	19.91	28.12		15.92	17.17		11.14	18.81
chpS	29.31	26.3		20.63	17.56		14.69	15.79
cirA	14.34	18.05		115.57	124.48		52.27	329.24
citC	0.36	0.65		0.37	0.08		1.05	1.01
citD	0.13	1.1		0.14	0.48		1.39	0.88
citE	0.85	0.67		0.52	0.34		2.03	0.99
citF	0.4	0.47		0.11	0.18		1.03	0.86
citG	0.36	0.46		0.39	0.27		0.8	1.64
citT	1.58	1.59		1.03	0.64		2.22	2.51
citX	0.18	1		0.08	0.52		0.6	1.7
clcA	17.79	18.36		10.46	11.22		24.76	25.7
clcB	2.61	2.29		3.01	4.39		5.46	2.17
clpA	131.83	121.38		59.47	61.71		111.4	130.52
clpB	318.09	291.65		132.61	144.31		153.36	463.06
clpP	775.59	756.26		446.51	429.54		352.32	545.35
clpS	26.96	27.7		19.21	18.55		25.13	33.65
clpX	804.16	766.12		513.69	521.92		546.95	673.09
clsA	60.61	62.8		40.39	38.42		36.65	48.03
clsB	2.36	1.79		2.79	3.13		33.26	26.59
clsC	6.24	5.33		5.39	6.86		14.44	14.29
cmk	135.3	149.37		186.76	209.31		236.87	168.83
cmoA	13.92	16.06		20.22	23.7		36.03	21.13
cmoB	13	11.9		19.28	20.84		29.49	12.42
cmoM	86.88	82.64		57.68	61.14		45.84	61.32
cmtA	0.54	0.73		0.12	0.18		2.58	2.25
cmtB	0.8	0.32		0.39	0.57		1.77	2.76
cnoX	116.51	128.66		81.5	92.3		63.41	145.37
cnu	57.57	59.48		13.73	21.41		35.24	11.24
coaA	26.82	28.26		36.78	35.11		24.47	22.01
coaD	34.57	33.73		38.77	50.64		64.51	38.77
coaE	35.26	37.57		26.05	27.41		46.56	45.49
cobB	47.87	53.17		48.32	49.67		51	52.9
cobC	7.28	5.17		9.48	10.03		23.46	20.62
cobS	2.37	2.03		2.05	1.09		2.14	1.7
cobT	4.51	3		2.77	3.53		4.67	3.64
cobU	16.25	14.64		7.83	8.01		7.12	12.26
codA	17.27	18.87		21.02	20.74		56.88	25.36
codB	3.58	4.47		3.85	3.94		41.06	4.22
cof	28.58	25.92		14.72	15.6		17.98	21.63
comR	23.46	21.88		19.96	20.92		37.02	42.87
copA	21.14	22.57		15.51	15.4		52.37	20.69
corA	40.72	46.56		34.03	40.92		23.23	25.89
cpdA	239.27	225.78		192.01	197.68		280.06	263.12
cpdB	39.48	39.64		21.84	22.13		26.11	27.48
cpoB	179.2	175.35		273.61	295.79		247.01	382.48
cpsB	0.32	0.55		1.2	0.78		2.91	2.33
cpsG	0.84	0.94		0.74	0.29		5.99	2.6
cpxA	116.7	116.85		128.89	105.24		10.78	7.75
cpxP	240.17	196.61		1007.41	774.11		14	20.08
cpxQ	140.31	113.57		493.1	401.42		2.14	4.52
cpxR	282.61	285.04		379.55	313.13		27.64	35.73
cra	173.77	185.63		145.81	150.71		84.75	133.38
crcB	27.9	25.01		17.57	18.98		44.76	33.71
creA	47.58	46.04		26.29	26.5		29.24	38.98
creB	19.14	20.33		15.32	13.56		11.69	17.02
creC	7.41	7.73		3.39	3.81		4.94	5.51
creD	1.32	1.57		0.78	0.96		2.45	1.15
crl	154.77	157.72		211.53	190.23		200.95	265.43
crp	1413.64	1323.38		1053.59	1056.64		491.09	811.36
crr	1526.65	1510.51		1445.88	1417.84		3702.83	2737.63
csdA	51.65	48.65		45.26	44.83		102.05	72.09
csdE	65.06	61.13		62.57	58.88		118.84	72.25
csgA	3.86	2.37		1.74	1.93		4.54	5.08
csgB	0.69	0.4		0.47	0.04		1.72	1.63
csgC	6.48	4.9		5.42	6.97		8.94	15.56
csgD	2.52	3.45		0.26	0.39		0.92	0.91
csgE	1.27	1.05		0.22	0		0.74	0.22
csgF	0.71	2.05		0.72	0.47		1.29	1.36
csgG	2.66	3.03		2.24	2.46		4.84	2.12
csiE	50.77	48.16		19.69	18.51		44.71	63.93
cspA	16750.6	17779.4		15794.6	16710		10379.7	10336.2
cspB	320.28	355.75		191.79	241.23		143.45	164.81
cspC	8842.16	8605.35		5238.9	5062.39		2198.8	5530.19
cspD	963.77	1117.56		446.46	386.32		314.3	378.45
cspE	1122.56	1490.37		1729.93	1658.82		1321.01	1412.41
cspF	9.39	12.06		7.77	12.33		19.13	10.98
cspG	261.4	337.59		144.96	182.54		108.37	63.75
cspH	2.6	3.06		1.41	2.2		3.3	4.52
cspI	5.3	9.19		9.38	8.19		3.11	4.62
csqR	56.23	52.98		36.66	35.85		34.87	23.98
csrA	1252.72	1262.86		623.82	649.08		1691.41	1675.07
csrB	801.12	888.14		215.63	194.65		113.62	56.48
csrC	298.61	329.78		50.31	45.35		42.88	33.25
csrD	27.54	32.21		20.01	21.8		24.57	32.33
cstA	45.11	55.08		81.93	80.44		63.98	175.64
cueO	10.62	13.31		9.61	8.72		30.35	13.99
cueR	68.18	58.73		45.71	34.88		39.44	43.95
curA	2.67	2.44		4.39	4.13		10.92	11.76
cusA	0.78	0.77		15.7	9.13		3.38	2.48
cusB	1.05	1.2		63.9	33.22		3.75	1.54
cusC	0.58	0.36		68.78	37.74		1.35	1.18
cusF	2.32	2.57		128.67	62.03		4.1	2.82
cusR	11.03	11.51		32.86	19.26		9.4	6.65
cusS	5.37	5.77		3.37	3.52		3.37	2.21
cutA	32.12	33.99		19.84	25.37		16.53	17.09
cutC	59.35	55.26		32.59	38.9		23.18	22.42
cvpA	30.04	34.91		37.44	41.91		160.86	80.36
cvrA	34.34	32.35		27.71	28.83		65.87	28.41
cyaA	129.85	117.61		111.32	104.99		244.29	131.6
cyaR	7.74	14.3		17.78	28.95		85.11	22.87
cyaY	24.86	32.27		34.07	29.54		30.28	26.57
cybB	180.73	165.61		137.14	118.05		74.28	79.93
cybC	29	35.91		18.1	22.44		37.77	53.36
cycA	29.24	32.13		65.05	68.11		104.81	239.44
cydA	1062.05	910.95		355.48	344.75		721.97	380.28
cydB	597.37	545.15		304.2	286.03		665.57	323.79
cydC	32.56	33.41		40.29	37.43		26.2	23.98
cydD	15.77	14.29		20.04	16.25		9.61	10.06
cydH	14.96	10.88		6.21	6.8		29.88	16.52
cydX	394.43	373.94		242.83	235.59		568.81	304.99
cynR	9.5	9.58		7.35	8.04		7.17	7.97
cynS	4.83	2.04		2.74	3.02		3.07	4.74
cynT	3.9	2.75		3.19	2.43		6.49	3.68
cynX	2.9	2.1		2.16	2.17		7.54	6.74
cyoA	740.97	887.2		1991.6	1973.12		824.17	621.8
cyoB	527.46	568.66		1033.32	1131.59		435.18	373.64
cyoC	278.74	293.93		416.26	469.73		168.33	176.68
cyoD	308.16	316.04		414.12	444.41		134.95	163.01
cyoE	189.67	208.33		259.41	303.79		74.4	116.21
cysA	4.13	5.66		5.66	4.38		28.78	17.21
cysB	136.3	132.23		77.35	84.08		71.2	96.26
cysC	3.46	4.41		3.08	3.21		12.83	8.01
cysD	2.9	3.23		2.58	1.62		13.68	8.16
cysE	147.49	167.09		131.04	134		134.34	208.48
cysG	29.92	25.26		21.55	18.87		15.72	17.28
cysH	4.53	4.36		8.48	3.33		48.91	10.71
cysI	3.98	3.18		5.81	4.54		32.86	10.81
cysJ	3.89	2.86		4.43	4.08		20.3	12.48
cysK	329.1	311.78		263.95	195.07		494.75	555.59
cysM	12.55	11.96		5.98	5.8		17.33	19.09
cysN	8.5	6.77		5.55	4.55		23.96	18.25
cysP	4.44	5.69		4.29	3.63		8.48	11.22
cysQ	134.14	122.14		61.24	57.98		167.65	124.06
cysS	86.24	87.81		101.86	101.17		134	65.51
cysT	956.46	790.84		798.71	768.33		533.59	818.24
cysU	1.38	1.71		1.31	1.55		6.75	7.68
cysW	3.1	3.49		2.92	2.55		11.36	9.86
cysZ	31.8	30.03		30	28.1		65.25	44.19
cytR	296.19	324.21		250.08	218.7		108.86	181.8
cyuA	22.65	34.38		46.92	47.25		11.66	22.63
cyuP	8.09	7.98		12.49	7.85		3.74	9.7
dacA	108.26	106.61		132.33	145.23		127.52	104.54
dacB	31.81	30.18		35.12	33.45		51.81	50.5
dacC	49.48	48.23		52.55	44.87		91.81	104.9
dacD	2.82	2.94		1.95	1.87		2.76	1.97
dadA	244.99	315.87		469.59	461.29		629.23	1300.7
dadX	167.14	211.59		258.71	293.19		383.76	771.19
dam	71.37	75.02		52.94	64.34		101.39	85.33
damX	194.26	196.04		166.37	183.13		333.16	224.38
dapA	595.89	555.56		411.46	423.14		556.77	565.83
dapB	22.69	18.66		18.3	16.59		16.15	19.37
dapD	806.97	744.99		560.05	547.91		164.92	459.87
dapE	125.01	129.39		67.68	73.96		175.39	172.78
dapF	105.26	100.9		75.06	71.21		40.77	73.79
dauA	17.24	15.73		24.38	29.47		83.06	31
dbpA	5.06	5.68		10.87	11.51		43.26	27.69
dcd	185.04	187.33		166.18	154.08		361.04	238.06
dcm	32.68	32.68		38.92	39.4		35.61	24.69
dcp	28.92	27.66		21.15	21.17		18.56	30.18
dcrB	429	402.28		343.87	332.93		178.04	170.47
dctA	21.48	25.73		10.45	13.39		10.74	10.6
dctR	0.11	0		0.28	0.07		2.57	1.07
dcuA	102.95	96.79		42.87	41.37		20.49	27.73
dcuB	3.14	2.55		0.91	1.07		1.3	1.76
dcuC	1.69	1.06		1.1	0.38		1.82	1.88
dcuD	1.24	2.61		1.81	1.76		3.19	2.72
dcuR	52.58	54.13		10.3	13.09		9.05	8.17
dcuS	28.17	30.25		5.81	6.61		17.71	15.82
dcyD	42.87	39.82		48.92	56.6		58.51	49.56
ddlA	162.14	165.31		99.53	101.68		76.43	110.21
ddlB	112.76	106.09		109.75	107.76		107.53	159.74
ddpA	1.83	2.77		3.24	3.8		44.05	85.88
ddpB	1.61	1.87		2.06	2.36		31.1	42.39
ddpC	3.36	2.84		2.56	3.17		29.47	40.76
ddpD	2.41	2.85		1.92	2.01		26.72	37.15
ddpF	7.86	8.23		4.94	4.89		45.45	45.9
ddpX	2.65	2.07		4.14	6.34		49.36	117.71
deaD	115.37	116.48		294.86	326.89		599.19	196.23
decR	38.82	43.99		48.03	43.04		24.47	42.4
dedA	55.47	55.93		74.94	73.14		115.36	102.71
dedD	86.37	91.32		80.31	83.69		133.21	121.7
def	480.59	431.18		349.15	351.66		394.62	436.96
degP	132.07	138.52		52.72	55.73		56.62	55.86
degQ	37.78	36.75		21.96	19.44		39.15	33.33
degS	18.63	21.27		22.29	24.06		34.53	20.8
deoA	335.94	356.05		257.77	236.23		257.1	97.37
deoB	1237.8	1189.82		1165.95	1121.93		972.06	1251.14
deoC	534.09	531.77		448.12	395.53		226.81	107.65
deoD	1435.38	1340.61		1235.72	1191.5		787.97	1272.57
deoR	32.77	38.83		28.06	30.11		25.53	29.53
der	93.92	94.74		105.8	119.46		273.61	183.7
dfp	85.38	86.47		88.66	94.37		80.28	66.14
dgcC	1.85	2.72		1.85	1.08		5.25	3.62
dgcE	9.36	9.04		11.19	11.14		63.37	66.19
dgcF	6.52	8.6		6.78	8.81		11.59	6.34
dgcI	1.67	1.93		1.89	1.68		7.1	3.08
dgcJ	7.62	8.43		5.03	5.95		15.79	3.62
dgcM	8.09	5.79		8.59	6.29		197.81	160.94
dgcN	11.28	11.5		12.31	11.8		35.75	18.78
dgcP	26.75	32.96		41.66	42.99		58.12	48.55
dgcQ	8.69	8.72		5.2	6.73		12.58	10.85
dgcT	4.23	4.88		1.03	1.15		3.38	2.61
dgcZ	13.26	14.31		25.54	18.54		5.92	3.73
dgkA	85.42	73.12		63.7	62.17		81.22	74.25
dgoA	4.61	5.44		3.86	3.38		2.38	2.9
dgoD	3.08	2.96		1.29	1.64		2.5	2.78
dgoK	14.93	14.78		13.15	11.26		5.41	10.25
dgoR	45.91	48.35		31.51	34.47		9.2	27.73
dgoT	2.3	2.1		1.25	1.06		2.69	2.77
dgt	40.46	43.66		21.6	20.15		24.28	34.46
dhaK	163.76	160.94		81.74	65.55		11.76	74.97
dhaL	211.54	216.11		127.84	118.27		21.66	98.32
dhaM	145.49	146.94		95.64	88.95		22.1	84.2
dhaR	17.91	15.43		8.94	7.85		7.44	12.69
diaA	119.3	130.16		88.2	88.41		138.42	139.93
dicA	75.22	63.38		75.31	71.18		46.54	54.24
dicB	1.36	0.11		0.45	0.19		1.86	0.35
dicC	0.17	0.97		0.37	0.62		1.43	0.66
dicF	0.75	1.54		4.87	1.36		3.12	7.43
digH	13.77	12.79		11.82	10.96		11.05	10.24
dinB	9.94	9.17		7.55	8.08		10.54	13.77
dinD	22.99	24.52		21.41	18.76		13.04	22.64
dinF	12.5	13.74		16.3	16.71		23.74	16.29
dinG	25.85	24.41		23.74	24.1		20.91	26
dinI	16.74	21.14		16.77	17.63		57.01	23.64
dinJ	128.43	111.42		100.03	87.96		124.26	147.46
dinQ	147.08	126.97		114.6	101.1		155.62	124.69
djlA	45.47	47.83		37.92	43.22		39.85	35.37
djlB	0.25	0.87		0.3	0.43		2.03	1.3
djlC	2.32	2.95		1.44	1.55		2.89	3.99
dkgA	25.78	19.24		12.98	11.08		68.97	62.27
dkgB	22.8	18.16		18.81	16.58		9.88	22
dksA	1951.16	1958.8		913.73	992.27		482.13	609.59
dld	141.53	132.47		112.23	106.1		223.35	331.74
dmlA	5.62	5.58		3.56	3.84		7.01	5.92
dmlR	67.69	78.06		56.69	48.95		16.18	64.56
dmsA	1.81	1.35		0.58	0.89		2.95	1.67
dmsB	3.14	2.38		1.15	1.48		7.33	2.48
dmsC	5.25	4.01		2.88	3.19		8.62	6.35
dmsD	42.98	43.37		37.35	43.27		27.41	33.03
dnaA	88.45	93.91		85.99	111.02		301.54	137.53
dnaB	80.25	84.79		75.36	76.99		89.62	75.45
dnaC	24.9	29.35		32.23	30.72		55.24	35.56
dnaE	38.41	38.81		44.14	47.91		53.1	71.17
dnaG	56.77	58.77		84.36	112.04		292	132.72
dnaJ	78.85	92.86		84.71	98.52		46.27	221.24
dnaK	1065.22	999.52		763.82	804.35		274.87	1693.17
dnaN	72.73	66.92		82.71	97.86		297.35	104.11
dnaQ	55.53	51.15		49.02	46.26		69.03	67.24
dnaT	27.5	24.47		32.03	35.22		51.06	37.38
dnaX	70.33	68.4		72.11	78.81		89.17	87.91
dolP	205.36	200.04		107.06	117.54		162.28	167.34
dosC	4.98	5.35		3.26	3.43		32.38	29.33
dosP	2.33	2.33		1.85	2.74		27.99	14.89
dpaA	47.38	49.54		68.78	73.99		75.37	52
dpiA	4.56	5.18		6.22	7.53		6.1	5.11
dpiB	5	3.31		2.38	2.97		8.02	6.56
dppA	302.59	330.86		620.51	583.57		589.18	2250.84
dppB	14.93	17.71		103.45	102.87		142.86	311.31
dppC	29.73	30.31		135.85	149.36		353.87	374.45
dppD	45.44	45.72		146.63	154.34		611.71	540.48
dppF	34.52	35.23		97.96	113.68		466.33	421.65
dps	446.68	347.9		290.76	251.25		6600.64	1751.8
drpB	1.5	0.4		0	0.77		6.69	1.52
dsbA	383.46	392.45		810.89	643.28		192.32	195.03
dsbB	102.39	97.51		105.09	105.58		66.49	85.45
dsbC	122.31	128.53		104.84	112.36		153.31	197.14
dsbD	30.6	36.32		25.89	28.03		26.01	21.06
dsbG	25.5	30.41		24.97	24.91		59.59	70.08
dsdA	1021.22	921.31		22.85	30.92		34.64	346.06
dsdC	73.81	65.95		11.64	13.71		8.99	39.97
dsdX	512.92	527.82		15.66	19.97		7.25	165.77
dsrA	7.18	9.41		5.9	5.93		74.1	53.35
dsrB	32.48	29.89		28.65	19.52		17.73	21.4
dtd	112.92	124.78		74.57	62.69		71.07	124.41
dtpA	183.8	185.67		126.38	128.56		9.89	5.22
dtpB	121.86	125.84		20.38	19.4		119.69	46.52
dtpC	4.7	5.47		2.27	3.36		6.92	7.69
dtpD	4.03	3.28		3.57	5.75		8.04	6.93
dusA	25.35	32.67		24.72	30.75		40.85	19.8
dusB	70.18	78.77		232.87	293.93		523.48	179.4
dusC	4.97	7.36		10.7	15.79		33.82	13.33
dut	271.16	278.18		267.91	302.66		219.77	171.84
dxr	28.43	25.83		27.05	29.34		33.73	37.14
dxs	114.86	116.76		129.6	129.85		131.65	136.31
eaeH	0	0		0.05	0.06		1.7	0.79
eamA	6.97	11.15		8.02	8.08		19.47	22.52
eamB	5.05	3.99		3.58	1.93		4.43	4.02
ebgA	18.42	22.95		14.1	14.29		9.4	17.14
ebgC	20.42	23.38		7.45	9.28		8	14.38
ebgR	39.92	40.91		27.56	23.55		31.19	26.22
ecnA	83.6	82.06		106.58	120.81		122.63	91.11
ecnB	47.82	40.37		44.58	53.24		375.83	246.04
eco	148.28	158.23		86.92	82.57		70.64	137.46
ecpA	7.41	7.18		2.16	2.88		4.12	4.13
ecpB	1.21	1.4		0.22	0.56		3.28	1.21
ecpC	1.57	2.29		0.89	0.91		2.01	2.3
ecpD	5.61	5.19		3.18	2.91		5.83	5.91
ecpE	6.38	7.29		3.08	3.32		10.76	8.8
eda	19.24	22.62		16.1	22.17		14.72	17.68
edd	16.26	17.25		13.67	13.23		6.36	9.06
efeB	5.76	6.94		3.38	6.56		22	57.59
efeO	11.64	11.81		4.5	9.33		18.39	78.38
efeU	3.36	4.47		2.54	3.97		11.06	35.7
efp	783.82	813.69		945.17	1038.77		613.55	510.5
elaA	12.26	16.42		7.49	8.3		25.03	19.12
elaB	201.62	145.55		275.4	221.67		2652.14	2035.78
elaD	1.96	1.68		1.21	1.13		11.76	4.1
elbB	110.96	102.53		16.89	19.26		60.25	47.28
elfA	2.86	2.87		0.8	0.8		2.6	0.93
elfC	0.95	1.12		0.55	0.69		3.01	2.06
elfD	0.65	0.55		0.09	0.33		2.27	0.84
elfG	2.92	2.78		2.01	1.85		4.27	3.45
elyC	7.06	5.67		4.46	6.71		7.13	5.33
emrA	25.1	26.2		25.52	32.21		97.55	40.1
emrB	10.56	10.89		8.5	10.4		39.96	23.3
emrD	12.46	13.72		20.51	18.98		97.21	14.23
emrE	18.67	19.66		18.52	20.05		27.33	12.81
emrK	0.44	0.72		0.3	0.49		3.34	2.12
emrY	2.12	1.74		0.31	0.11		3.91	3.24
emtA	65.61	66.41		48.87	50.98		67.29	50.24
endA	5.4	5.36		4.34	7.95		13.26	7.01
eno	1136.26	1152.1		1678.65	1682.45		4126.37	2721.57
entA	11.45	10.4		29.28	32.83		7.37	23.86
entB	8.54	10.98		31.4	33.82		5.01	23.24
entC	5.14	6.05		37.47	39.95		5.66	42.97
entD	0.83	2.63		2.35	3.59		3.26	4.72
entE	6.03	7.44		31.13	31.74		6.71	27.49
entF	11.16	11.55		40.51	41.31		7.9	53.08
entH	6.41	7.29		22.89	23.34		6.05	13.79
entS	5.14	5.88		22.98	21.33		6.03	45.31
envC	46.06	52.89		47.2	49.79		56.9	37.83
envR	1.16	0.89		2.5	2.14		1.56	1.68
envY	1.35	1.12		1.35	1.18		2.99	2.98
envZ	72.86	78.76		23.81	24.5		12.25	14.84
epd	504.7	404.21		183.57	169.5		462.12	392.34
epmA	8.1	8.38		17.49	24.76		31.17	10.69
epmB	49.89	48.77		48.59	49.2		72.3	44.33
epmC	63.37	69.17		83.6	93.67		147.12	149.88
eptA	2.07	2		1.73	1		5.3	5.03
eptB	36.31	45.66		177.33	162.21		18.3	15.69
eptC	20.67	20.39		24.04	30.28		53.92	35.56
era	130.64	136.2		183.33	212.57		564.06	274.57
erpA	59.27	72		54.25	59.66		53.9	49.65
esrE	86.45	85.62		95.67	95.77		103.39	92.5
essD	3.21	3.97		1.19	2.17		4.98	4.86
essQ	1.1	1.13		0.3	0.17		1.05	1.21
etk	6.9	5.82		5.02	4.97		11.06	8.61
etp	2.92	3.28		2.4	1.77		6.39	3.42
ettA	151.66	144.03		144.79	152.25		166.39	236.45
eutA	1.37	1.54		1.19	0.53		4.27	4.21
eutB	65.16	56.13		52.99	47.41		70.39	90.7
eutC	22.25	23.49		12.29	13.51		16.51	22.88
eutD	2.92	2.47		0.95	1.01		5.8	5.1
eutE	0.85	0.8		0.18	0.33		2.95	1.62
eutG	1.2	0.39		0.42	0.48		2.66	1.8
eutH	1.89	2.09		0.39	0.89		4.65	3.53
eutJ	0.4	0.68		0.54	0.17		2.59	1.54
eutK	27.55	26.09		14.58	13.75		26.3	28.28
eutL	26.97	23.64		13.35	12.89		19.49	23.23
eutM	7.07	9.09		4.68	6		13.86	18.22
eutN	1.03	0.57		0	0.12		2.15	2.13
eutP	2.39	1.87		0.81	0.07		3.75	3.74
eutQ	1.55	2.06		1.29	0.36		4.54	3.89
eutR	6.98	8.15		6.22	5.81		16.44	12.65
eutS	0.65	0.36		0.77	0.64		1.97	1.82
eutT	2.24	1.65		1.1	0.56		5.17	5.17
evgA	154.18	161.85		72.32	63.28		22.13	20.09
evgL	388.08	409.91		184.07	154.74		64.12	67.06
evgS	14.31	15.34		2.51	2.29		9.97	4.7
exbB	99.13	102.77		274.07	264.87		62.9	443.65
exbD	84.87	92.49		253.36	255.86		62.49	409.73
exoD	3.07	2.55		0.33	1.05		1.8	3.89
exoX	52.59	46.48		42.03	40.57		25.08	29.19
exuR	156.54	148.19		114.46	112.77		93.22	144.96
exuT	17.64	17.46		8.58	7.92		23.88	22.27
eyeA	25.87	30.45		21.2	16.31		68.39	47.23
fabA	772.04	839.98		829.27	864.3		394.43	681.55
fabB	310.08	335.92		234.27	242.94		130.51	131.63
fabD	313.69	341.36		289.8	300.45		198.1	212.44
fabF	649.86	669.63		660.64	702.92		596.35	396.86
fabG	1853.03	1837.88		1719.15	1667.18		681.28	1304.29
fabH	113.65	127.64		101.58	134.06		139.19	97.1
fabI	559.87	540.62		918.15	931.23		510.78	601.75
fabR	241.03	243.01		107.1	102.31		73.67	124.84
fabY	66.18	76.3		44.26	43.4		48.81	77.37
fabZ	500.77	495.17		412.17	418.68		367.19	465.2
fadA	39.72	44.89		40.39	41.72		269.37	438.71
fadB	17.62	27.15		58.99	62.5		356.66	489.37
fadD	21.42	24		54.19	62.55		708.65	997.86
fadE	38.86	45.34		74.74	73.06		418.29	347.31
fadH	19.95	22.27		59.27	55.1		212.24	353.3
fadI	36.96	43.21		117.29	108.12		419.96	607.32
fadJ	28.18	37.16		51.35	51.97		221.05	307.64
fadK	1.39	1.68		1.1	0.99		2.74	2.74
fadL	166.82	177.81		166.45	194.28		1372.2	1764.99
fadM	7.25	7.72		8.78	7.67		57.44	42.91
fadR	144.79	149.64		163.93	164.61		115	142.29
fau	46.64	44.02		40.82	47.9		73.1	70.23
fbaA	846.01	789.72		735.94	729.59		1751.13	1582.25
fbaB	12.67	12.28		13.63	13.12		369.76	133.2
fbp	186.7	201.28		163.98	176.02		100.52	109.55
fcl	0.78	0.97		0.18	0.45		2.16	2.49
fdhD	39.22	36.09		29.58	29.43		54.71	30.26
fdhE	382.41	381.73		322.82	336.69		540.25	372.59
fdhF	12.3	13.13		9.7	9.3		14.79	15.53
fdnG	1.41	1.61		0.64	0.55		2.06	2.04
fdnH	2.33	2.83		1.75	1.02		2.73	2.45
fdnI	5.48	5.11		4.17	3.08		3.89	3.38
fdoG	1208.82	1216.64		1015.01	1064.88		1664.88	1139.61
fdoH	1039.59	1022.5		756.17	816.65		1435.3	1007.61
fdoI	925.46	886.25		649.31	698.45		1159.63	835.93
fdrA	0.52	0.61		0.26	0.2		0.69	0.87
fdx	132.77	141.72		104.62	113.31		109.82	162.83
feaB	7.63	5.52		5.5	5.45		18.89	21.91
feaR	7.52	10.17		20.78	21.33		33.61	68.26
fecA	217.56	238.17		352.75	401.03		47.18	363.89
fecB	160.59	178.64		235.81	264.99		28.11	245.45
fecC	62.81	60.36		93.5	102.95		14.51	120.74
fecD	43.94	41.75		82.06	92.05		13.49	92.7
fecE	52.13	62.27		119.35	123.32		14.68	134.31
fecI	15.44	13.91		43.06	38.81		10.7	93.63
fecR	7.62	6.99		27.97	25.12		7.41	60.67
feoA	60.35	57.24		36.19	35.43		15.79	21.48
feoB	39.69	34.76		29.8	32.49		14.45	17.82
feoC	27.24	22.2		23.75	23.08		11.87	13.29
fepA	3.46	2.84		14.86	15.42		4.15	19.16
fepB	10.49	10.8		28.51	30.85		7.63	49.95
fepC	8.1	8.87		31.12	26.97		4	32.61
fepD	8.55	8.87		16.12	15.97		4.98	32.7
fepE	0.31	0.11		1.31	1.73		1.71	2.64
fepG	7.46	8.01		21.66	20.8		6.08	33.8
fes	10.9	8.88		20.61	19.35		5.16	65
fetA	28.24	27.79		16.04	16.64		12.32	16.87
fetB	14.49	13.52		6.34	8.4		8.88	8.77
ffh	203.09	189.77		173.92	171.89		250.61	191.6
ffs	16.67	8.05		15.46	12.63		18.87	19.18
fhlA	5.31	5.78		5.02	4.98		31.12	25.21
fhuA	128.42	130.08		252.97	247.4		27.56	254.19
fhuB	6.44	6.47		12.31	11.54		4.65	12.76
fhuC	30.69	31.61		74.77	72.04		14.28	63.11
fhuD	8.67	14.85		25.66	28.07		7.03	25.4
fhuE	5.82	5.91		11.16	13.15		6.09	34.23
fhuF	63.31	52.7		149.76	125.88		24.69	508.98
fic	5.65	6.02		4.53	4.12		16.53	15.3
fieF	68.32	68.54		47.54	54.77		61.64	57.1
fimA	2191.8	2010.82		285.52	507.75		365.57	785.98
fimB	181.12	170.66		40.77	42.43		12.28	25.67
fimC	36.27	37.44		6.42	9.27		19.54	16.66
fimD	7.07	5.73		1.08	2.26		6.38	4.19
fimE	1.86	1.37		0.29	0.66		1.73	1.61
fimF	11.86	7.49		2.79	3.49		7.09	6.63
fimG	9.11	9.59		3.15	3.36		9.6	7.94
fimH	11.27	10.1		3.36	4.86		12.03	8.45
fimI	83.38	88.79		15.2	29.62		51.4	48.92
fimZ	0.25	0.32		0.14	0.11		1.37	1.52
fis	63.2	67.43		282.95	352.64		504.56	160.51
fiu	7.74	7.79		38.65	43.19		11.62	89.14
fixA	1.46	1.38		0.59	0.65		1.72	1.93
fixB	1.37	1.08		1.3	0.42		1.73	1.09
fixC	2.18	2.28		1.02	0.84		1.27	1.9
fixX	0.55	0.64		1.12	1.19		2.08	1.21
fklB	326.68	329.18		329.19	306.89		102.65	274.8
fkpA	728.97	704.61		387.46	402.61		217.63	285.86
fkpB	90.51	98.39		78.4	99.56		100.16	154.53
fldA	262.54	265.61		350.55	355.04		344.62	351.31
fldB	146.87	141.78		139.87	126.02		154.73	152.61
flgA	133.05	132.25		143.35	134.64		58.01	145.08
flgB	2016.84	1938.5		1900.62	1869.15		646.31	2209.52
flgC	1800.28	1704.09		1728.95	1647.8		681.96	2257.22
flgD	1787.23	1728.26		1824.53	1783.84		777.13	2534.19
flgE	1010.68	1027.14		1120.59	1180.75		542.57	1674.81
flgF	433.9	460.36		499.41	580.49		274.17	782.62
flgG	389.22	414.74		557.68	608.71		261.42	791.88
flgH	184.49	186.63		282.62	309.04		177.16	503.13
flgI	165.41	152.91		241.82	260.99		153.08	432.76
flgJ	134.96	147.39		208.28	226.11		134.38	418.31
flgK	672.37	657.92		458.07	455.04		281.46	558.67
flgL	919.74	894.23		640.68	606.56		435.73	778.62
flgM	698.38	665.21		574.09	516.89		292.53	588.85
flgN	367.65	371.39		302.68	294.96		176.68	350.03
flgO	162.21	161.32		117.35	125.49		95.46	151.67
flhA	88.74	82.69		148.25	154.13		63.38	149.74
flhB	79.44	71.47		70.46	74.91		27.18	91.26
flhC	165.66	186.63		179.98	186.5		231.39	146.72
flhD	279.06	304.45		313.8	321.56		430.53	273.25
flhE	85.4	74.21		134.17	139.54		50	145.89
fliA	1109.23	1090.26		779.33	781.65		321.98	971.54
fliC	11760	11551.3		10305.9	9460.39		4626.02	8267.64
fliD	340.37	375.95		295.34	291.26		130.22	235.21
fliE	152.74	166.64		181.17	172.16		44.98	126.13
fliF	334.15	348.9		437.17	448		221.34	539.98
fliG	414.29	388.95		562.16	583.87		270.59	685.52
fliH	271.46	266.57		412.95	427.34		206.21	549.73
fliI	125.46	122.91		203.32	204.54		103.03	307.65
fliJ	112.87	112.21		214.53	219.27		79.89	283.68
fliK	128.26	131.26		222.89	234.72		81.18	310.62
fliL	726.21	693.86		783.89	809.16		260.22	899.18
fliM	359.14	366.45		510.54	550.1		203.86	615.11
fliN	316.13	308.86		509.78	504.05		199.94	474
fliO	161.97	162.98		293.6	310.54		145.97	333.68
fliP	75.18	67.34		124.64	127.8		67.38	159.91
fliQ	51.7	65.18		126.38	140.47		71.86	172.83
fliR	19.4	19.67		39.58	40.98		27.79	59.23
fliS	464.5	453.62		433.82	426.22		196.93	337.37
fliT	280.01	277.93		266.07	276.23		146.37	267.01
fliX	3633.64	3461.55		3247.22	2843.09		1573.57	2492.74
fliZ	480.72	494.06		355.32	362		201.93	483.81
flk	31.67	31.45		31.13	32.93		63.11	36.47
flu	164.42	179.25		8.35	8.97		211.45	318.74
flxA	314.54	340.87		93.3	92.93		63.85	55.29
fmt	270.56	264.92		240.89	280.42		355.31	321.57
fnr	0	0		0	0		0	0
fnrS	5.19	3.01		1.59	2.65		8.65	6.45
focA	48.92	43.92		36.29	38.02		53.52	61.73
focB	5.2	4.11		2	2.78		8.45	5.87
folA	59.32	69.72		54.88	66.23		83.3	57.26
folB	23.5	25.15		18.17	22.77		35.93	21.27
folC	42.07	43.62		45.18	52.35		84.51	72.24
folD	39.1	39.78		38.69	43.17		55.73	32.01
folE	299.04	305.93		334.39	291.94		715.65	635.62
folK	10.97	11.6		20.59	23.58		39.26	28.11
folM	18.95	18.81		21.28	21.08		30.64	27.64
folP	71.78	73.91		48.49	52.92		71.82	65.5
folX	286.25	272.92		198.24	212.69		280.23	323.91
fpr	157.23	147.53		126.33	103.5		80.16	129.33
frc	0.71	0.59		0.48	0.4		2.28	1.49
frdA	65.65	66.17		50.08	51.74		95.31	91.37
frdB	67.99	70.67		45.2	52.09		103.48	96.1
frdC	79.35	73.54		50.63	57.79		117.78	110.88
frdD	80.3	76.31		50.85	63.32		122.04	119.78
fre	51.45	47.21		50.63	55.46		56.75	53.52
frlA	1.67	1.55		0.75	0.46		2.04	3.15
frlB	10.65	7.54		7.81	7.11		21.45	46.45
frlC	6.08	3.58		2.79	2.36		5.45	12
frlD	8.77	9.11		4.13	3.04		8.74	15.8
frlR	25.75	24.1		16.14	10.91		10.51	12.61
frmA	71.51	67.45		60.42	66.75		56.48	55.57
frmB	44.61	41.89		35.68	41.66		30.08	34.09
frmR	85.66	88.67		68.98	68.65		53.21	79.15
frr	1025.05	944.97		774.97	775.71		685.76	702.69
frsA	35.07	26.5		26.8	25.09		26.68	21.25
fruA	11.84	10.68		5.23	5.75		30.29	14.76
fruB	52.52	44.21		19.95	15.88		61.45	60.63
fruK	24.21	20.72		9.98	7.8		40.31	34.37
frvA	0.35	0.23		0.48	0.85		1.71	0.34
frvB	0.8	0.7		0.64	0.82		1.72	1.14
frvR	1.66	1.54		0.85	1.22		2.12	2.5
frvX	3.81	3.71		2.77	3.26		3.9	4.37
frwB	20.11	28.02		6.02	8.24		2.38	5.11
frwC	2.44	4.46		1.61	1.87		1.59	1.3
frwD	3.07	5.01		2.58	1.42		2.12	3.2
fryA	1.42	2.07		1.21	0.97		4.71	3.63
fryB	1.21	1.12		1.12	0.66		2.72	3.08
fryC	1.13	1.26		0.62	0.74		3.28	3.73
fsaA	4.27	7.97		2.95	3.72		6.24	5.44
fsaB	14.93	15.1		8.26	8.52		7.05	13.29
fsr	13.43	16.54		5.67	5.78		22.36	22.74
ftnA	514.08	496.73		408.82	432.76		682.07	220.6
ftnB	100.85	94.89		72.26	58.69		3.78	9.24
ftp	12.97	13.48		13.43	16.68		54.06	22.51
ftsA	58.51	56.29		44.06	46.74		51.8	67.78
ftsB	88.02	82.55		63.08	79.18		169.05	123.63
ftsE	55.2	50.54		45.06	45.45		36.24	37.92
ftsH	718.56	723.7		694.95	705.9		1219.08	1159.53
ftsI	45.98	46.04		36.77	41.83		35.95	35.05
ftsK	102.76	104.69		84.22	84.51		75.82	89.78
ftsL	115.66	121.19		97.46	102.74		101.84	91.77
ftsN	134.85	141.5		112.16	117.63		93.94	116.17
ftsO	48.36	46.18		37.17	41.88		32.1	38.33
ftsP	58.67	63.59		58.44	61.08		109.29	99.97
ftsQ	90.47	72.91		62.65	65.39		95.36	138.2
ftsW	41.41	38.35		39.06	42.33		37.65	61.72
ftsX	32.42	28.08		26.88	29.32		26.89	22.03
ftsY	52.28	51.54		43.32	40.59		33.02	36.25
ftsZ	231.84	231.29		197.51	206.55		324.89	317.57
fucA	10.85	8.75		4.21	3.89		4.69	9.21
fucI	24.85	23.32		12.69	11.85		17.35	34.12
fucK	18.14	16.08		6.34	7.95		12.99	17.81
fucO	20.2	20.2		8.47	6.78		8.86	17.89
fucP	7.34	5.76		4.23	4.6		5.26	7.52
fucR	122.59	122.83		71.95	64.25		44.87	97.77
fucU	45.03	39.15		17.78	18.38		37.99	38.98
fumA	207.72	218		202.95	211.93		213.6	560.86
fumB	8.42	6.13		2.74	3.34		2.95	5.51
fumC	23.37	25.59		18.01	20.5		92.24	101.45
fumD	12.63	11.46		6.14	5.31		13.4	16.45
fumE	57.61	54.62		35.73	39.76		78.27	79.88
fur	513.69	512.21		560.35	527.34		598.45	612.33
fusA	5328.63	5551.9		7168.17	7543.56		3071	4285.58
fxsA	37.98	39.12		42.75	45.83		30.05	60.83
gabD	14.84	11.64		11.82	10.23		479.21	1044.7
gabP	3.08	3.13		1.23	1.76		221.25	261.03
gabT	12.15	10.57		10.13	10.98		579.04	1139
gadA	7.69	6.43		2.55	4.16		7.94	5.21
gadB	2.74	3.14		2.52	3.08		12.22	10.02
gadC	2.37	1.86		1.62	2.06		11.16	4.36
gadE	1.5	0.81		0.81	0.89		7.36	2.44
gadF	3.05	2.02		0	1.98		9.09	3.12
gadW	10.76	9.01		1	1.63		43.13	4.98
gadX	4.3	5.31		1.41	2.51		19.05	6.2
gadY	2.8	4.81		0.41	0.17		31.22	6.19
galE	426.95	420.94		187.85	226.31		89.22	567.19
galF	297.49	311.83		343.89	357.6		1012.12	568.69
galK	273.91	294.6		85	97.62		222.55	582.89
galM	341.87	329.31		164.26	158.75		307.14	606.63
galP	156.91	156.26		41.25	45.21		114.42	242.15
galR	58.63	56.79		39.25	39.73		31.03	60.28
galS	12.29	16.42		28.03	25.93		30.42	103.85
galT	228.81	237.63		77.29	91.65		77.8	384.67
galU	426.88	406.43		320.63	357.51		491.77	336.98
gapA	5922.89	5471.24		6580.16	5971.2		2569	6221.45
gapC	155.37	134.56		112.09	95.7		462.05	290.85
garD	12.32	17.44		6.34	8.26		20.87	15.47
garK	16.1	13.77		5.29	5.89		22.98	7.27
garL	31.13	28.65		7.13	6.21		27.42	5.25
garP	35.61	28.44		13.91	16.24		4.85	4.52
garR	39.58	32.15		8.13	8.8		144.62	15.22
gatA	614.28	663.17		556.15	570		1430.98	1705.73
gatB	742.6	724.29		476.34	501.71		1661.9	1719.98
gatC	601.61	562.19		343.42	366.04		1894.83	1479.28
gatD	295.51	298.05		135.76	149.87		1199.65	990.8
gatR	12	11.94		8.1	9.6		63.68	44.43
gatY	1631.77	1613.04		1406.62	1271.83		1576.07	2576.94
gatZ	893.75	928.8		792.24	741.91		1523.05	1960.71
gcd	5.73	5.54		6.02	6.67		174.19	133.69
gcl	1.31	1.59		1.36	1.58		3.26	2.39
gcvA	10.31	11.71		12.73	17.27		28.52	29.78
gcvB	830.25	876.62		328.46	320.37		913.51	433.1
gcvH	1080.01	1133.88		283.96	313.76		1056.05	1989.91
gcvP	367.9	398.06		110.97	133.79		580.09	925.45
gcvR	298.24	289.42		185.4	168.18		162.4	276.07
gcvT	725.56	802.03		323.05	340.77		710	1115.64
gdhA	72.76	72.32		96.8	90.15		61.57	117.13
gdx	35.55	42.52		22.1	18.95		115.97	122.74
gfcA	6.99	5.8		6.6	6.17		31.84	12.58
gfcB	1.66	0.66		0.5	0.75		4.65	2.03
gfcC	1.09	0.82		0.6	0.55		5.54	1.49
gfcD	1.14	1.34		1.26	1		5.57	2.62
gfcE	1.86	2.09		1.47	1.48		5.46	3.49
ggt	8.16	7.97		10.42	9.99		88.57	71.4
ghoS	2.6	2.13		0.14	1.45		7.73	5.23
ghoT	7.97	3.28		0	0.93		8.92	9.43
ghrA	52.53	42.31		49.13	49.93		80.42	116.69
ghrB	293.32	270.24		176.2	167.3		71.68	177.67
ghxP	3.58	3.66		2.36	3.71		15.84	5.35
ghxQ	10.77	9.97		4.62	5.25		33.19	12.9
glaH	5.18	6.71		7.1	9.25		462.07	1019.66
glaR	16.43	12.73		7.26	7.9		195.89	159.9
glcA	0.52	0.97		0.23	0.38		92.22	11.33
glcB	31.42	30.94		16.52	18.32		1731.73	276.02
glcC	20.27	26.26		79.57	93.91		210.19	362.76
glcD	0.44	0.49		0.49	0.36		183.59	118.1
glcE	0.85	0.72		0.76	0.46		200.22	62.61
glcF	7.47	11.4		3.83	4.54		509.46	116.61
glcG	30.46	31.82		18.2	17.99		1647.56	276.39
gldA	17.79	16.03		11.21	11.23		22.33	17.41
glf	20.84	23.85		25.44	25.51		23.21	42.62
glgA	106.62	92.23		41.91	35.53		226.31	162.52
glgB	68.58	65.28		38.52	38.35		113.36	150.15
glgC	147.6	135.09		49.34	48.02		229.53	199.84
glgP	75.28	67.2		39.52	38.11		203.15	136.93
glgS	128.85	151.38		66.6	76.27		230.1	86.38
glgX	64.81	60.56		27.9	30		114.37	110.99
glk	441.71	395.54		285.83	251.34		246.67	458.67
glmM	314.18	329.5		182.91	205.82		163.6	224.34
glmS	323.9	322.66		233.96	247.9		391.71	249.38
glmU	328.03	324.15		239.35	255.81		274.67	231.27
glmY	12.59	8.09		4.2	2.93		10.34	12.24
glmZ	51.92	59.4		42.35	34.73		40.77	24.03
glnA	545.35	485.6		754.64	716.3		307.79	946.71
glnB	112.26	98.48		59.45	61.04		78.34	142.3
glnD	20.21	21.56		20.11	24.25		17.91	20.11
glnE	30.6	30.46		20.51	19.09		29.86	39.85
glnG	34.52	29.97		9.3	8.84		46.75	42.99
glnH	312.21	268.36		157.31	161.59		397.09	830.45
glnK	0	0.12		0.25	0		1.59	1.74
glnL	37.28	35.17		12.3	14.24		69.3	113.52
glnP	82.23	77.68		54.86	51.2		82.83	153.6
glnQ	130.19	119.09		81.43	82.94		149.62	246.22
glnS	335.87	323.18		337.37	345.09		263.66	249.09
glnU	1368.39	1377.06		1952.47	1963.42		1487.68	1391.82
glnV	639.49	652.41		832.37	830.61		492.37	443.56
glnW	915.72	868.22		1276.44	1326.64		1097.17	968.86
glnX	326.04	339.62		427.17	403.27		234.14	208.47
gloA	203.34	199.14		234.04	199.02		342.3	328.44
gloB	41.96	43.24		32.57	33.82		58.39	69.33
gloC	154.98	156.26		205.29	187.7		126.88	132.65
glpA	184.98	208.28		79.68	86.89		90.7	360.81
glpB	188.08	201.86		75.03	81.84		69.52	332.35
glpC	179.61	193.85		60.96	76.11		72.14	250.86
glpD	3128.99	3387.1		1841.4	1897.05		4747.09	5060.68
glpE	50.8	63.74		76.49	68.5		77.3	102.51
glpF	1321.16	1526.04		902.9	945.43		1110.11	1792.2
glpG	70.84	76.64		80.16	81.93		129.16	96.49
glpK	5341.31	5386.95		2181.8	2373.97		2792.76	5546.86
glpQ	814.65	862.05		152.43	191.65		184.93	770.1
glpR	73.19	67.21		77.73	86.28		120.83	75.96
glpT	1047.66	1198.34		224.28	268.75		232.65	759.7
glpX	179.3	210.51		137.91	156.2		192.68	296.67
glrK	19.7	20.52		9.93	9.4		30.94	32.33
glrR	17.84	16.91		11.65	12.21		24.29	14.28
glsA	0.68	0.5		0.37	0.52		2.11	1.73
glsB	27.28	30.03		37.99	44.06		39.63	26.14
gltA	752.74	690.9		328.8	349.84		1043.51	2791.77
gltB	138.16	130.75		89.24	92.05		179.3	248.41
gltD	133.41	117.23		103.86	90.32		133.18	292.89
gltF	9.99	10.88		18.59	18.44		22.71	43.85
gltI	116.43	136.07		173.2	155.7		237.42	379.82
gltJ	14.19	18.08		21.17	28.46		35.09	55.63
gltK	20.91	26.8		25.66	30.15		56.78	50.41
gltL	58.2	69.75		54.22	56.93		160.66	107.68
gltP	90.74	85.76		131.51	134.19		41.75	65.4
gltS	17.99	19.31		19.46	26.59		20.24	8.67
gltT	311.07	410.55		457.45	552.08		664.06	571.42
gltU	15.11	15.03		42.97	44.03		57.97	31.07
gltV	20.32	23.61		36.75	49.24		57.7	32.8
gltW	221.45	244.72		318.35	466.38		715.77	511
gltX	184.67	178.98		297.42	316.48		540.67	300.95
gluQ	18.48	18.96		24.69	30.43		31.04	28.57
glvB	0.9	2.22		1.02	1.22		1.7	3.87
glvC	1.65	1.99		0.85	1.35		2.19	2.67
glvG	3.74	3.2		2.69	2.65		2.36	4.05
glxK	0.05	0.43		0.58	0.41		2	0.84
glxR	1.22	1.76		1.83	0.76		4.59	2.94
glyA	827.17	874.19		566.34	547.72		678.94	885.15
glyQ	194.16	196.62		236.85	248.66		179.87	189.83
glyS	334.85	317.53		415.89	431.22		283.27	348.01
glyT	1018.77	1102.61		1064.91	1088.18		955.05	1019.3
glyU	12.04	12.4		6.68	10.94		34.66	37.23
glyV	144.5	130.86		147.39	158.54		527.35	369.44
glyW	1256.34	1009.21		993.31	983.11		685.84	1059.02
glyX	125.75	123.61		147.68	162.8		530.89	379.22
glyY	31.96	43.92		44.2	59.82		174.63	158.25
gmd	1.11	0.98		1.26	0.93		3.06	3.31
gmhA	336.36	307.63		243	252.02		162.9	234.16
gmhB	52.46	56.15		35.44	35.3		25.78	15.72
gmk	169.66	161.32		151.51	163.06		241.51	215.2
gmm	0.54	0.85		0.4	0.07		1.55	1.14
gnd	856.31	851.36		822.23	874.74		331.3	766.27
gnsA	94.79	96.11		52.98	45.39		22.35	35.94
gnsB	38.92	45.94		31.61	23.37		12.13	43.48
gntK	47.1	58.28		12.09	12.13		7.44	10.56
gntP	16.82	18.66		8.09	6.35		3.48	7.16
gntR	63.44	55.63		45.84	49.75		42.72	48.28
gntT	83.23	93.7		23.23	27.88		13.62	37.89
gntU	19.48	22.83		5.99	6.49		10.55	6.26
gor	95.41	95.79		97.19	100.71		109.37	83.77
gph	63.36	59.33		53.05	52.44		56.41	54.05
gpmA	796.73	768.56		945.27	898.19		879.16	1040.04
gpmM	250.73	221.98		254.86	250.97		327.05	224.86
gpp	96.44	94.76		117.29	115.65		103.89	130.48
gpr	33.51	30.01		30.24	27.58		137.04	63.9
gpsA	557.62	568.28		354.83	369.87		319.95	422.55
gpt	21.78	21.19		54.07	77.77		133.61	33.16
grcA	29.7	25.7		157.8	121.87		83.11	31.66
greA	243.24	233.26		212.71	246.39		288.19	205.56
greB	87.67	70.24		43.42	40.85		31.48	41.72
groL	1674	1496.6		730.16	752.08		198.88	1638.4
groS	728.69	716.06		500.05	476.07		116.93	955.68
grpE	945.4	911.97		623.89	606.23		380.46	1392.5
grxA	19.88	15.41		13.58	12.27		18.6	15.51
grxB	221.89	197.07		150.54	139.14		651	260.31
grxC	1131.74	1119.29		612.3	630.88		462.93	672.07
grxD	899.42	851.66		832.45	806.61		467.29	482.58
gshA	331.07	322.89		237.51	253.05		447.5	427.24
gshB	123.09	125.41		131.45	135.5		94.46	113.57
gsiA	28.58	28.29		21.33	18.95		38	50.19
gsiB	21.05	23.3		13.88	13.98		58.77	39.74
gsiC	9.57	11.62		6	6.68		30.39	17.66
gsiD	6.19	5.55		3.16	3.02		12.25	10.41
gsk	31.83	35		54.85	66.23		128.8	55.51
gspA	0.75	0.83		0.42	0.75		3.08	2.05
gspB	5.28	5.73		2.81	5.27		7.24	9.06
gspC	1.21	1.4		0.47	0.44		3.65	1.82
gspD	2.47	2.08		1.68	2.21		7.21	4.41
gspE	1.19	1.36		1.17	1.27		4.56	3.07
gspF	3.54	3.49		2.73	2.21		4.32	3.87
gspG	0.5	1.21		0.83	1.81		1.89	2.55
gspH	0.54	0.56		0.72	0.46		1.83	1.33
gspI	0.79	1.51		0.85	0.33		2.57	0.4
gspJ	1.52	2.57		0.88	0.37		3.45	1.79
gspK	3.94	3.09		2.58	1.96		3.93	4.4
gspL	3.62	3.28		1.72	3.4		5.69	4.43
gspM	2.14	2.38		2.05	2.14		6.94	5.73
gspO	8.38	8.66		5.17	4.96		17.54	17.09
gss	34.04	33.05		41.4	38.27		72.59	47.45
gstA	99.85	90.96		55.85	47.18		47.48	58.71
gstB	83.75	75.56		49.9	49.5		62.61	86
guaA	122.09	130.67		179.43	192.28		317.9	188.02
guaB	45.44	38.49		70.76	78.86		306.16	86.1
guaC	68.41	71.75		114.76	110.38		123.23	68.16
guaD	8.17	8.84		3.5	3.56		36.76	8.63
gudD	2.79	2.01		1.7	1.41		7.06	3.59
gudP	3.41	3.12		1.16	1.7		2.83	2.54
gudX	1.98	1.41		2	0.93		2.98	2.01
gutM	63.03	62.99		86.01	77.57		73.66	28.18
gutQ	47.35	47.04		56.12	54.44		93.91	31.67
gyrA	94.72	86.88		75.99	82.64		138.55	94.77
gyrB	126.97	121.57		139.71	146.67		175.35	116.83
hcaB	6.26	7.17		3.89	3.5		11.45	17.94
hcaC	4.81	6.23		3.95	5.1		9.54	13.96
hcaD	6.16	6.92		3.22	2.8		9.9	15.63
hcaE	3.14	3.79		1.88	1.53		5.35	10.42
hcaF	3.97	4.48		4.02	3.88		9.88	11.38
hcaR	44.04	63.65		98.8	88.55		103.3	328.82
hcaT	14.75	13.43		10.78	13.64		26.22	35.77
hchA	77.74	64.15		17.5	16.47		630.74	157
hcp	0.4	0.43		0.4	0.32		1.66	1.11
hcr	0.96	0.53		0.55	0.46		1.39	1.76
hcxA	9.91	11.52		7.97	10.72		14.11	23.69
hcxB	41.02	39.69		39.56	41.24		46.05	80.41
hda	30.38	32.16		22.62	24.78		82.77	34.92
hdeA	94.54	86.47		59.69	52.25		23.35	20.69
hdeB	32.7	28.88		20.83	19.7		10.5	5.48
hdeD	14.24	13.88		7.05	6.53		5.41	2.9
hdfR	64.75	64.82		39.75	41.64		25.63	36.97
hdhA	128.08	111.77		37.13	38.09		177.51	127.16
helD	18.48	17.36		17.13	17.25		16.74	17.65
hemA	77.47	80.44		59.52	66.46		104.77	75.43
hemB	215.71	219.16		269.75	266.51		110.19	104.31
hemC	293.68	290.55		228.81	216.69		134.91	190.54
hemD	100.71	106.26		88.41	90.55		78.35	95.32
hemE	141.56	135.32		109.62	107.48		95.9	100.63
hemF	34.23	35.67		44.45	44.04		81.66	51.36
hemG	80.32	70.48		53.4	58.66		72.39	67.28
hemH	46.12	43.98		41.99	39.96		136.88	93.3
hemL	207.52	198.87		116.31	121.05		133.86	111.95
hemN	99.11	95.26		68.65	65.34		88.46	63.88
hemW	55.88	59.67		66.01	64.15		136.55	95.41
hemX	94.98	92.82		69.88	70.39		94.65	93.07
hemY	131.34	138.05		104.21	106		160.65	145.01
hflC	568.7	531.59		629.33	550.96		672.79	598.92
hflD	47.74	48.22		79.96	93.58		147.65	77.01
hflK	564.38	561.84		665.83	630.14		763.19	674.36
hflX	264.83	285.14		330.44	308.74		288.91	317.93
hfq	1505.24	1485.09		847.67	819.44		610.54	686.51
hha	244.2	234.38		328.29	308.09		231.68	178.33
hicA	15.33	11.41		7.65	11.79		20.22	11.49
hicB	14.67	15.11		16.54	16.09		30.95	14.68
higA	22.41	21.22		23.55	16.57		56.1	90.3
higB	6.16	8.87		6.28	4.4		11.69	6.94
hinT	331.81	348.95		173.75	156.88		370.87	459.45
hipA	10.72	10.08		7.93	8.5		7.9	8.13
hipB	31.44	25.05		17.06	20.28		10.3	16.05
hisA	25.78	25.45		35	40.37		13.82	29.93
hisB	38.58	36.76		38.59	41.36		19.19	38.98
hisC	24.02	23.95		30.33	38.37		13	28.95
hisD	25.99	28.25		34.99	34.99		11.93	26.04
hisF	40.13	42.07		58.07	56.52		21	43.4
hisG	25.87	26.38		30.75	35.19		11.9	21.7
hisH	24.22	23.67		32.29	32.06		12.25	30.16
hisI	63.02	65.61		87.7	81.7		29.47	65.99
hisJ	65.52	64.23		81.23	84.68		291.69	458.06
hisL	8.54	7.2		3.37	1.41		4.87	7.72
hisM	7.37	7.11		8.57	12.7		51.41	43.67
hisP	11.26	12.75		13.66	18.78		160.88	57.86
hisQ	8.82	11.28		16.01	15.74		70.75	92.82
hisR	281.83	274.91		358.03	387.66		664.57	646.83
hisS	156.43	168.85		150.6	160.83		268.27	213.29
hiuH	17.55	12.22		2.34	4.65		6.05	4.65
hldE	102.37	102.09		111.98	117.39		175.9	111.54
hlyE	0.26	0.81		0.33	0.47		5.17	2.06
hmp	31.87	33.6		18.01	17.86		18.55	20.31
hns	6008.93	5663.07		4012.09	3838.48		3505.88	3058.75
hofB	5.21	4.11		3.67	2.87		4.89	5.41
hofC	2.45	3.09		2.11	1.65		2.97	3.65
hofM	2.87	3.97		2.31	3.23		2.92	3.2
hofN	1.72	1.28		1.03	0.87		1.72	2.75
hofO	0.72	0.83		0.93	0.41		1.97	0.79
hofP	0.83	1.56		1.22	1.78		2.04	1.35
hofQ	0.89	0.97		0.31	0.96		1.59	1.61
hokA	5.31	4.18		5.1	6.51		6.62	6.72
hokB	114.99	113.68		95.98	78.89		170.83	131.47
hokC	43.83	46.47		28.42	26.85		26.63	29.73
hokD	145.96	124.06		85.95	99.54		163.88	105.83
hokE	4.14	4.4		2.11	2.94		5.81	4.43
holA	35.67	29.07		33.88	34		69.47	61.6
holB	38.67	37.07		30.62	38.51		62.55	45.3
holC	131.91	134.62		103.95	107.18		160.07	173.71
holD	40.6	33.5		53.77	56.15		96.72	50.76
holE	31.29	37.26		29.58	22.9		23.28	20.64
hpf	349.8	352.21		237.63	231.09		478.03	488.82
hprR	21.18	18.72		14.61	12.8		7.45	7
hprS	6.15	7.7		1.22	1.01		6.44	4.05
hpt	185.65	202.72		253.57	250.82		260.49	228.97
hrpA	31.2	29.42		30.9	33.73		54.52	49.24
hrpB	17.98	16.9		15.73	16.07		23.45	17.28
hscA	94.92	95.29		65.38	66.49		84.32	110.26
hscB	31.62	30.95		30.86	35.57		50.95	54.37
hscC	5.08	5.93		5.04	6.08		3.05	4.4
hsdM	34.51	33.91		29.27	31.64		53.53	37.02
hsdR	85.52	86.07		56.94	56.05		57.55	86.31
hsdS	17.47	17.6		11.49	14.63		25.52	27.15
hslJ	32.81	28.35		49.53	53.68		87.33	52.78
hslO	68.7	74.24		65.46	70.91		66.33	119.93
hslR	75.9	75.28		65.69	85.4		80.47	155.35
hslU	308.7	305.78		247.55	273.94		176.14	464.82
hslV	158.66	174.4		149.76	166.57		111.64	268.95
hspQ	154.35	121.01		119.87	120.97		243.26	175.97
hsrA	17.87	15.61		13.75	12.13		15.41	16.54
htpG	468.8	432.34		221.92	247.43		70.33	467.02
htpX	303.82	287.59		675.61	581.19		91.65	81.69
htrE	0.55	0.52		0.27	0.44		1.72	0.9
htrL	20.54	18.78		28.75	27.43		36.69	26.81
hupA	5662.12	5720.92		3574.67	3339.61		1148.91	2092.99
hupB	2207.29	2258.82		1145.99	1161.93		440.95	1378.19
hxpA	279.97	272.23		253.52	233.21		271.24	340
hxpB	82.75	77.61		55.56	59.01		51.45	42.88
hyaA	1.15	1.53		0.42	0.23		4.53	2.5
hyaB	0.72	0.93		0.22	0.26		3.68	1
hyaC	0.48	0.78		0.58	0.18		3.24	0.83
hyaD	0.81	0.55		0.88	0.8		2.46	0.45
hyaE	0.94	0.92		0.27	0.45		5.49	1.21
hyaF	0.74	0.93		0.4	0.31		4.17	1.55
hybA	28.21	26.84		9.82	12.61		33.8	7.87
hybB	13.6	15.74		5.87	6.65		20.37	4.54
hybC	13.29	14.34		7.92	7.41		17.84	12.22
hybD	46.84	53.64		28.56	31.99		52.61	41.97
hybE	28.87	26.82		18.85	15.05		32.82	30.77
hybF	9.38	12.22		9.42	7.52		19.23	15.41
hybG	17.1	18.51		14.67	13.58		39.46	27.4
hybO	59.65	57.06		22.39	23.72		53.72	15.11
hycA	1.37	0.75		0.37	0.31		2.73	2.46
hycB	0.71	0.37		0.53	0.24		4.26	2.11
hycC	0.61	0.95		0.39	0.37		2.82	1.57
hycD	0.86	1.19		0.7	0.84		3.74	1.59
hycE	1.89	1.69		0.46	0.94		6.11	4.17
hycF	2.73	2.29		2.06	1.16		4.15	5.11
hycG	4.15	3.43		3.81	2.79		5.06	6.75
hycH	10.84	9.33		7.63	5.56		10.42	14.68
hycI	21.78	18.75		17.11	14.71		23.45	26.7
hydN	2.02	3.79		3.09	2.04		8.78	6.3
hyfA	0.74	0.4		0.49	0.2		2.34	1.95
hyfB	1.1	1.58		0.95	0.97		3.18	2.73
hyfC	0.4	0.37		0.2	0.46		1.59	1.48
hyfD	0.95	1.19		0.16	0.64		3.23	2.29
hyfE	1	0.94		0.46	0.47		1.84	3.33
hyfF	1.68	2.26		1.51	0.98		4.62	3.97
hyfG	3.32	3.62		2.19	2.36		9.02	7.64
hyfH	2.83	1.98		1.53	2.47		6.63	6.33
hyfI	1.62	1.18		0.88	1.75		3.27	5.24
hyfJ	0.57	0.79		0.73	0.26		3.1	3.06
hyfR	1.59	1.7		0.89	1.01		3.74	3.35
hyi	0.71	0.58		1	0.35		3.01	1.35
hypA	4.4	5.17		2.88	3.23		6.42	6.98
hypB	10.91	11.66		8.44	10.26		15.52	14.98
hypC	11.89	13.52		9.68	9.1		18.26	16.98
hypD	58.96	58.13		26.56	23.43		39.4	50.59
hypE	10.87	12.24		10.29	8.08		33.59	26.26
hypF	3.41	3.77		2.85	3.24		9.97	6.49
hypT	18.87	18.54		11.99	11.7		10.68	13.26
hyuA	1.81	2.07		0.57	0.84		13.36	3.46
iaaA	45.42	40.91		25.69	24.16		38.95	78.14
iadA	62.51	64.99		55.01	53.03		20.56	35.48
iap	10.07	8.84		7.95	9.43		29.41	16.81
ibaG	53.11	61.58		42.81	43.32		61.81	61.23
ibpA	19.61	21.28		30.41	52.33		47.11	305.66
ibpB	3.69	4.94		5.51	13.84		32.26	156.13
ibsA	13.2	14.96		16.83	17.09		24.48	26.24
ibsB	9.73	10.38		3.77	2.84		9.43	18.03
ibsC	6.71	9.18		5.01	7.4		22.52	16.52
ibsD	40.26	29.57		20.05	24.89		30.34	63.78
ibsE	60.83	53.25		59.81	60.87		86.87	102.29
icd	484.54	499.55		479.38	546.82		553.16	1150.69
icdC	0.96	0.25		0	0.65		1.25	3.45
iclR	108.14	119.79		59.75	67.48		36.05	60.38
idi	59.51	64.37		78.83	77.25		96.95	119.19
idlP	4.71	0.73		0	1.07		1.97	1.56
idnD	1.73	1.28		0.65	0.91		1.36	1.67
idnK	4.32	8.06		3.09	3.99		5.68	11.71
idnO	2.8	2.91		2.08	1.29		3.81	2.63
idnR	9.87	7.78		6.09	4.61		9.15	11.43
idnT	6.79	6.72		3.08	3.28		6.24	7.06
igaA	50.45	55.78		50.92	52.77		55.14	96.12
ihfA	1079.89	1017.22		962.13	904		2238.97	1222.81
ihfB	419.62	448.23		311.83	277.02		434.58	502.56
ileS	254.62	245.15		232.19	231.01		194.92	284.31
ileT	27.77	39.99		39.63	50.01		79.24	53.67
ileU	34.97	28.34		39.63	48.14		81.66	67.87
ileV	29.06	32.05		42.97	52.11		71.45	60.77
ileX	1.56	2.68		5.37	4.97		1.91	14.96
ileY	0	0		0	0		8.16	0.58
ilvA	16.33	16.88		17.27	17.22		8.94	16.73
ilvB	49.47	58.15		61.29	64.45		28.86	69.19
ilvC	36.92	31.28		467.94	443.81		26.36	31.5
ilvD	20.99	21.41		18.28	19.43		10.52	17.15
ilvE	28.08	27.45		23.66	28.69		9.39	18.43
ilvG	43.92	49.75		35.36	33.49		5.73	19.04
ilvH	3.02	3.85		4.89	3.22		4.33	6.8
ilvI	4.53	5.12		4.11	4.59		3.97	5.13
ilvL	41.67	61.11		32.12	26.47		8.43	31.81
ilvM	9.07	11.28		7.33	9.88		3.06	6.87
ilvN	44.36	52		59.59	59.54		18.84	55.38
ilvX	109.61	127.43		90.58	65.5		13.52	33.02
ilvY	29.41	28.06		15.69	19.22		13.53	19.18
inaA	88.29	92.57		133.58	116.55		115.59	127
infA	334.7	369.5		424.25	479.63		640.73	398.6
infB	147.58	138.3		143.96	150.52		132.99	139.37
infC	5189.03	5240.21		5874.44	6065.65		4483.08	3737.22
insA1	7.96	9.75		8.95	8.8		12.82	10.62
insA2	5.09	6.43		6.85	4.82		6.37	7.92
insA3	2.94	2.29		2.34	2.8		3.75	3.88
insA4	5.88	4.8		7.4	6.91		33.95	17.67
insA5	5.31	6.5		3.5	3.72		7.42	9.35
insA6	4.11	3.69		1.84	1.61		4.57	7.08
insA7	21.88	22.31		18.45	9.52		8.62	19.09
insA9	65.23	62.31		85.38	80.75		81.71	112.5
insB1	21.96	27.19		14.03	16.39		20.97	22.56
insB2	3.26	3.84		3.75	2.07		7.76	4.9
insB3	11.35	12.3		8.53	8.6		11.74	11.28
insB4	50.56	51.23		61.73	62.97		142.98	135.32
insB5	7.54	11.25		4.31	5.46		7.59	9.37
insB6	4.18	6.07		3.23	2.09		5.01	4.66
insB7	5.62	8.62		7.03	6.53		10.18	12.15
insB9	65.58	66.29		87.73	80.38		83.86	111.37
insC1	21.98	21.45		19.51	15.6		27.09	27.22
insC2	25.55	23.64		18.26	18.03		24.94	27.46
insC3	22.5	22.51		16.81	17.07		24.7	27.1
insC4	37.87	47.75		33.99	33.18		49.39	47.44
insC5	22.99	24.63		18.18	14.67		21.32	25.43
insC6	43.77	46.08		31.7	26.64		46.23	56.04
insD1	10.28	11.1		8.43	7.93		14.57	14.47
insD2	11.55	11.13		8.7	9.03		12.24	18.38
insD3	10.27	10.51		7.79	7.55		11.78	14.16
insD4	19.14	19.4		13.47	14.14		20.78	25.29
insD5	10.75	10.02		7.56	7.77		12.22	13.19
insD6	19.67	18.68		15.27	13.21		25.89	24.23
insD7	6.03	6.46		3.27	4.9		9.19	9.95
insE1	13.4	8.02		8.45	6.9		10.89	9.11
insE2	7.44	7.3		5.01	6.02		6.37	6.07
insE3	7.04	6.91		4.68	4.16		5.58	6.46
insE4	10.1	11.69		8.17	7.14		10.48	12.1
insE5	6.53	7.57		4.08	3.86		7.4	5.25
insF1	7.65	7.76		5.6	6.33		10.78	11.4
insF2	3.88	4.85		3.09	3.02		7.75	6.57
insF3	3.37	3.94		2.71	2.73		5.94	6.8
insF4	5.85	7.93		5.18	6.23		13.79	10.29
insF5	7.1	6.57		6.1	6.17		25.8	20.71
insG	10.94	14.95		7.76	7.96		8.5	8.92
insH1	147.3	136.64		107.11	115.93		64.65	115.42
insH2	178.46	165.33		116.7	125.05		33.21	80.8
insH3	149.36	142.69		112.28	117.13		71.05	143.28
insH4	139.59	133.75		112.19	109.39		60.09	113.37
insH5	0.14	0.17		0.24	0.39		0.11	0.31
insH6	82.91	71.41		62.67	61.61		35.72	60.61
insH7	84.53	80.68		68.03	71.4		35.57	91.01
insH8	72.88	67.75		55.24	58.01		30.83	58.56
insH9	134.04	128.58		104.9	111.07		59.46	114.64
insH10	72.03	66.13		60.15	58.29		29.62	62.48
insH11	73.99	67.02		52.96	57.83		31.08	60.07
insH21	140.84	133.75		111.75	119.07		62.54	121.35
insI1	12.77	11.84		7.63	7.79		10.88	13.5
insI2	20.82	20.98		21.12	15.51		17.24	23.25
insI2	6.91	6.14		3.62	3.47		5.62	8.85
insI3	8.1	7.15		4.28	4.93		6.19	7.9
insJ	3.67	5.38		5.27	5.91		8.44	5.86
insK	3.32	2.47		2.27	3.67		5.41	2.28
insL1	47.45	47.27		42.05	46.1		69.49	74.03
insL2	37.64	41.98		37.3	43.5		62.67	56.09
insL3	69.1	71.59		73.23	81.59		103.29	90.26
insM	3.9	3.04		4.26	1.09		2.29	4.25
insN	14.52	13.34		8.14	8.5		15.92	16.51
insO	6.15	6.18		3.64	3.56		4.86	6.67
insQ	26.19	20.46		20.44	18.36		24.45	29.17
insX	28.71	36.61		28.91	20.88		25.67	34.16
insZ	3.69	3.23		4	5.72		9.41	5.78
intA	106.46	102.16		40.34	38.04		28.88	64.83
intB	21.21	19.83		11.62	13.51		29.66	17.92
intD	29.27	30.2		12.52	12.76		15.99	23.58
intE	3.69	3.78		3.05	2.41		8.56	5.8
intF	30.44	30.35		17.15	18.69		27.92	22.51
intG	85.59	96.34		97.66	98.67		32.55	91.78
intQ	1.16	1.16		1.15	0.84		3.59	2.3
intR	0	0		0	0		0	0
intS	19.87	23.04		17.85	17.31		17.29	15.33
intZ	16.97	16.46		13.61	11.85		12.22	20.29
iprA	1.08	1.5		0.65	0.66		1.56	1.68
iraD	2.82	2.39		0.93	0.73		2.79	2.39
iraM	4.4	3.9		0.53	0.22		0.77	0.54
iraP	65.17	49.69		45.2	43.57		154.46	240.37
iroK	22.8	31.83		34.84	53.16		57.04	227.95
iscA	105.11	113.61		88.27	103.9		152.9	146.32
iscR	111.55	105.26		77.34	97.1		105.32	204.72
iscS	184.93	190.07		152.21	175.17		272.02	283.62
iscU	146.94	163.2		132.25	149.8		217.69	218.5
iscX	201.55	198.56		158.96	150.47		163	242.61
ispA	124.28	138.24		138.12	139.32		127.37	136.16
ispB	185.7	185.81		178	173.93		240.76	221.51
ispD	34.53	37.29		42.46	54.43		113.22	65.05
ispE	135.88	147.11		181.63	194.6		287.66	154.64
ispF	44.8	44.74		54.79	62.41		111.95	57.13
ispG	303.37	299.5		277.48	272.6		408.67	417.33
ispH	97.15	94.03		106.26	112.82		95.72	153.05
ispU	48.07	57.92		49.66	60.99		72.75	52.89
ispZ	39.92	38.78		44.38	52.8		59.68	69.9
isrC	32.09	34.93		2.42	1.66		39.25	43.17
istR	1.41	1.46		2.76	0.77		2.07	5.31
ivbL	189.2	207.64		153.67	188.65		118.88	211.82
ivy	105.14	91.21		29.65	35.15		84.52	131.8
jayE	0.57	0.75		0.52	0.66		1.36	1.1
katE	5.09	4.65		8.26	7.97		66.2	84.63
katG	285.51	261.11		120.01	115.97		79.54	245.57
kbaY	2.21	4.26		3.27	2.51		3.72	4.83
kbaZ	12.89	14.71		6.59	6.9		11.42	28.29
kbl	300.27	320.25		157.05	154.7		127.09	144.79
kbp	76.56	67.52		63.55	59.89		967.13	268.92
kch	20.72	22.05		13.21	13.03		35.92	24.76
kdgK	178.84	170.73		141.4	126.61		54.47	76.09
kdgR	33.5	33.37		27.67	31.44		34.13	28.22
kdgT	5.59	5.22		4.72	5.3		2.77	7.73
kdpA	0.19	0.27		0.17	0.17		1.47	0.9
kdpB	1.27	0.86		1.23	0.7		2.4	1.71
kdpC	3.08	3.35		2.92	2.39		10.58	6.07
kdpD	6.88	5.23		1.62	1.78		17.44	10.64
kdpE	9.26	8.21		6.05	4.86		10.25	9.71
kdpF	0	0.23		0.24	0		0.92	0.97
kdsA	219	202.86		311.25	337.69		400.54	298.77
kdsB	95.37	86.76		102.06	110.36		63.16	77.95
kdsC	119.5	124.45		97.43	103.19		258.86	186.2
kdsD	74.77	76.3		71.43	73.12		171.17	136.96
kduD	21.59	26.09		12.97	17.05		17.81	31.28
kduI	24.15	29.51		18.43	22.96		21.7	50.68
kefB	11.36	11.95		12.35	12.57		9.8	14.98
kefC	7.37	7.04		4.52	6.17		41.58	24.72
kefF	5.93	6.38		2.59	5.52		27.97	21.21
kefG	10.02	10.66		11.23	13.84		4.62	10.24
kgtP	412.32	487.97		377.71	479.2		2837.65	3148.61
kilR	0	0		0	0		0	0
kilS	0	0		0	0		0	0
kptA	25.97	24.62		12.89	14.72		12.82	16.04
kup	7.27	7.99		9.91	11.61		18.28	9.8
lacA	26.5	25.96		3.97	3.91		150.77	62.06
lacI	21.37	22.65		20.77	19.22		48.34	78.71
lacY	14.98	15.22		1.54	2.94		60.9	32.16
lacZ	47.47	47.73		9.87	12.4		133.47	115.4
lafU	1.55	1.24		0.26	0.74		1.89	2.95
lamB	1066.92	1107.51		187.84	236.95		272.99	1963.26
lapA	119.44	95.7		82.19	79.36		102.62	133.47
lapB	43.15	41.55		32.54	33.82		52.77	67.79
lapC	67.29	61.44		71.25	77.32		147.09	136.09
ldcA	17.68	14.38		15.87	13.88		14.4	14.05
ldcC	7.73	6.3		5.07	5.07		16.88	21.43
ldhA	13.72	11.68		25.83	26.43		58.4	30.28
ldrA	134.38	127.27		242.93	240.4		325.01	208.34
ldrB	6.05	5.48		5.77	3.5		7.66	8.3
ldrC	8.07	9.06		10.35	12.66		9.58	12.55
ldrD	76.63	81.2		76	75.3		64.54	54.47
ldtA	23.22	21.75		14.56	13.04		42.7	60.05
ldtB	47.19	40.48		75.96	78.65		127.29	65.41
ldtC	15.04	13.45		62.3	57.8		5.22	5.62
ldtD	55.95	49.97		42.44	40.54		92.59	130.45
ldtE	54.2	42.02		34.59	32.44		187.04	104.9
lepA	174.62	182.69		173.89	200.17		446.78	243.5
lepB	165.73	165.34		148.82	171.09		440.47	244.91
letA	15.54	14.9		14.73	15.41		28.35	30.62
letB	13.63	14.42		19.59	18.74		50.33	35.57
leuA	6.39	7.38		7.03	9.81		6.04	12.38
leuB	10.55	10.64		15.74	17.73		13.28	21.01
leuC	11.05	8.56		15.87	18.52		12.9	22.85
leuD	13.53	14.71		16.74	17.34		17.2	27.78
leuE	15.03	15.96		12.31	14.19		15.12	9.92
leuL	0.23	2.58		1.98	0.83		5.47	1.01
leuO	7.75	8.03		3.41	2.51		4.42	3.19
leuP	22.76	32.82		35.57	33.5		81.94	81.44
leuQ	18.43	23.91		24.94	24.4		58.41	52.53
leuS	131.98	123.92		149.1	155.74		211.08	162.64
leuT	143.61	136.43		190.92	221.49		371.36	376.18
leuU	178.2	150.96		190.92	202.67		445.06	343.84
leuV	9.1	13.83		16.05	20.27		49.37	56.8
leuW	762.1	776.15		1028.94	1075.88		1033.87	983.68
leuX	4.19	6.72		6.07	16.93		11.19	11.83
leuZ	502.43	408.73		421.76	398.52		268.65	432.82
lexA	301.52	287.55		203.76	186.04		169.34	220.18
lfhA	2.59	2.61		1.77	1.13		3.3	3.14
lgoD	1.26	1.89		0.61	0.35		1.4	1.39
lgoR	30.29	29.95		18.32	16.79		3.89	9.56
lgoT	49.51	51.24		41.55	38.44		21.02	23.5
lgt	74.43	80.27		76.92	83.96		203.23	108.79
lhgD	7.89	6.32		6.87	7.53		345.71	751.3
lhr	6.88	7.22		6.25	7.25		9.8	9
ligA	50.9	52.49		39.33	48.67		111.48	75.83
ligB	6.42	5.89		3.8	4.19		2.86	5.43
lipA	139.81	112.78		343.28	323.96		369.46	107.48
lipB	28	27.51		35.68	45.6		50.68	38.11
lit	7	6.93		9.57	9.22		9.62	10.1
livF	5.41	3.94		4.39	4.99		4.75	6.62
livG	5.41	4.35		5.32	7.29		6.57	5.15
livH	1.13	1.19		1.74	2.31		2.21	3.44
livJ	6.38	8.24		5.68	7.82		5.43	7.41
livK	9.44	9.7		9.54	11.41		5.25	10.85
livM	5	4.24		6.62	6.34		6.17	6.26
lldD	535.28	488.95		283.84	303.7		933.66	1508.46
lldP	187.25	225.92		484.4	546.81		1176.56	2820.13
lldR	221.88	239.58		240.73	254.05		592.17	1276.06
lnt	33.37	33.76		46.27	55.54		110.27	79.91
loiP	146.19	142.19		117.03	124.07		362.5	318.76
lolA	76.64	80.21		53.37	59.89		33.32	76.25
lolB	49.4	53.21		60.61	49.85		81.51	75.73
lolC	52.24	51.17		62.81	64.85		56.67	51.82
lolD	38.22	35.99		55.43	53.13		50.41	35.98
lolE	31.23	33.89		48.22	48.96		59.53	49.81
lomR	0.09	0.1		0.15	0.24		0.06	0.19
lon	280.75	279.74		213.8	215.8		134.2	374.68
lpd	1184.26	1280.94		2149.19	2174.29		3229.06	4091.22
lplA	43.96	42.65		24.78	25.35		23.55	22.17
lplT	14.18	15.29		9.09	8.18		21.62	24.45
lpoA	61.6	57.62		66.5	69.16		125.71	108.83
lpoB	255.27	246.82		125.58	119.28		432.75	383.46
lpp	16623.8	18287.2		13276	11735.3		16547.6	10771.8
lptA	178.23	180.07		145.29	169.74		359.34	294.19
lptB	152.37	157.53		136.53	143.05		313.25	252.07
lptC	112.58	119.49		97.92	103.52		276.97	208.19
lptD	193.08	198.76		199.65	205.82		230.76	230.87
lptE	117.85	110.69		129.22	139.89		188.07	164.12
lptF	35.69	32.68		28.47	28.91		35.31	32.74
lptG	65.21	67.58		69.7	74.1		87.07	68.71
lpxA	446.34	448.22		459.02	443.79		366.67	470.05
lpxB	63.05	65.62		77.63	78.34		83.17	98.87
lpxC	1413.47	1337.44		1350.18	1379.48		1258.16	999.86
lpxD	412.42	419.48		301.76	356.03		437.06	642.27
lpxH	62.36	70.71		92.13	90.21		106.19	73.56
lpxK	36.63	34.36		54.6	64.88		85.29	58.53
lpxL	77.05	79.23		124.21	121.86		70.52	59.02
lpxM	53.17	59.77		50.56	53.88		52.67	35.66
lpxP	51.64	44.24		35.51	36.1		72.09	80.49
lpxT	81.75	78.75		97.75	103.49		60.49	82.26
lrhA	13.16	10.34		9.43	8.55		13.83	19.7
lrp	795.88	779.85		606.03	571.18		241.52	531.75
lspA	172.88	159.85		141.95	152.3		126.74	203.61
lsrA	1.25	1.63		1.27	0.81		1.63	3.45
lsrB	2.3	2.03		1.26	1.35		9.1	6.09
lsrC	1.75	0.83		1.46	0.93		2.63	3.57
lsrD	0.76	1.36		0.54	1.32		3.52	3.04
lsrF	1.67	1.56		0.44	0.41		5.76	3.3
lsrG	3.81	3.5		1.26	1.73		11.44	7.66
lsrK	4.79	4.01		2.39	3.4		6.83	8.25
lsrR	2.97	3.53		2.32	1		1.69	3.05
ltaE	90.38	89.76		61.31	55.67		85.19	110.71
luxS	624.23	595.12		536.31	492.77		1138.06	1099.88
lysA	8.06	5.93		4.78	5.6		6.06	10.47
lysC	33.67	36.41		33.9	32.95		9.01	22
lysO	8.98	10.83		14.13	16.51		32.86	14.29
lysP	27.48	30.72		55.43	61.39		92.56	69.92
lysQ	18.24	14.22		29.12	32.91		89	54.96
lysR	27.5	29.46		19.58	18.09		20.9	23.46
lysS	334.22	329.71		426.33	474.48		648.29	584.65
lysT	774.28	800.71		1238.34	1587.83		3022.03	1762.03
lysU	531.38	464.31		133.2	123.47		289.03	136.76
lysV	57.05	61.45		66.44	68.97		140.98	152.97
lysW	632.55	663.06		888.89	1169.04		2134.53	1301.67
lysY	223.01	230.23		360.48	592.57		1197.76	668.67
lysZ	203.21	204.47		408.26	580.73		1124.55	654
lyxK	2.21	1.76		0.66	0.76		2.86	2.76
maa	69.44	81.2		80.42	83.25		61.56	75.07
macA	21.41	23.04		12.28	16.93		22.19	23.85
macB	8.98	10.01		9.26	9.79		14.29	13.72
maeA	390.21	381.41		172.54	175.82		181.75	241.93
maeB	135.56	132.54		73.38	77.32		83.03	195.83
mak	4.18	4.96		3.07	2.61		6.8	7.07
malE	1370.9	1397.92		352.71	417.17		310.83	1934.77
malF	317.32	336.96		65.76	81.75		31.53	343.22
malG	288.84	295.37		46.86	65.21		32.85	241.45
malH	147.83	157.01		24.83	28.82		19.68	123.14
malI	14.66	16.67		11.67	10.53		5.77	9.95
malK	726.64	814.79		197.72	231.32		88.28	741.89
malM	567.73	591.34		74.56	98.69		48.06	451.82
malP	77.51	82.37		29.18	35.29		42.38	92.46
malQ	33.58	34.52		10.87	11.45		22.26	40.63
malS	12.09	13.09		8.53	7.99		9.55	22.65
malT	283.46	280.7		270.04	253.02		195.3	432.43
malX	18.08	18.67		14.59	16.43		6.31	12.48
malY	34.15	34.68		23.34	21.77		7.99	18.79
malZ	8.42	7.72		6.36	7.39		8.54	10.33
manA	204.83	180.12		124.15	129.33		63.99	101.32
manX	260.7	246.34		272.53	255.1		652.08	296.02
manY	296.48	274.61		303.77	308.86		1161.01	428.91
manZ	231.25	230.14		246.04	255.21		1062.97	358.96
maoP	345.65	344.52		227.17	226.9		177.67	64.12
map	460.75	413.26		475.58	458.59		154.08	243.15
marA	112.1	92.41		149.24	163.99		251.12	106.49
marB	46.38	31.1		66.13	77.23		111.92	62.31
marC	43.08	42.2		32.17	29.93		48.48	50.96
marR	37.14	30.57		40.65	47.57		91.39	37.95
matA	0.87	0.38		0.15	0		0.7	0.52
matP	99.39	91.52		69.54	55.88		52.01	66.52
mazE	60.59	64.7		56.26	54.56		52.91	76.32
mazF	43.78	51.89		36.77	35.98		51.89	54.34
mazG	16.52	15.89		11.86	12.36		30.27	21.95
mbiA	0.62	0.67		0.4	0.51		1.67	0.82
mcaS	6.53	6.73		5.03	6.51		13.64	14.66
mcbA	4.55	3.75		1.65	2.07		28.37	12.57
mcbR	4.91	5.97		4.87	5.73		42.64	39.33
mcrA	7.5	8.56		4.9	5.95		4.76	7
mcrB	26.56	24.72		18.86	19.09		28.54	20.06
mcrC	6.22	6.9		7.33	6.22		16.91	7.14
mdaB	168.37	166.06		197	188.83		56.76	130.71
mdfA	6.87	8.47		11.12	12.99		41.32	8.57
mdh	1865.34	1801.16		1120.72	1145.16		1501.93	3395.64
mdlA	12.62	14.19		14.69	16.25		11.35	12.95
mdlB	11.47	12.38		16.25	16.19		13.14	15.68
mdtA	8.39	6.78		6.65	7.37		17.58	14.1
mdtB	4.74	4.39		4.37	4.41		14.09	11.69
mdtC	3.4	3.01		3.5	3.59		9.87	10.93
mdtD	2.31	1.4		2.14	2.16		7.08	7.98
mdtE	2.53	1.41		1.41	1.91		4.5	3.91
mdtF	4.81	5.58		3.3	3.23		7.33	6.06
mdtG	5.34	3.41		4.19	5.7		12.04	6.59
mdtH	1.34	0.81		0.75	0.89		3.46	2.66
mdtI	11.88	8.22		20.38	25.35		11.53	12.52
mdtJ	18.61	13.65		32.41	39.33		11.36	3.64
mdtK	41.44	40.45		22.61	26.74		71.61	28.28
mdtL	5.4	5.79		5.54	6.41		5.26	6.32
mdtM	4.61	4.85		3.43	2.57		10.59	4.54
mdtN	1.9	1.94		0.67	1.06		1.8	1.82
mdtO	1.72	1.63		0.37	0.84		1.64	2.23
mdtP	0.93	1.47		0.67	1.17		1.48	1.67
mdtQ	0.46	0.33		0.22	0.26		1.71	1.39
mdtU	30.67	27.19		49.72	51.16		13.79	4.07
melA	5.2	4.41		2.44	2.57		110.57	23.88
melB	5.24	5.38		2.25	2.96		29.08	10.5
melR	32.28	26.43		26.85	27.04		14.56	28.05
menA	12.03	13.35		11.57	13.99		12.96	10.43
menB	58.78	62.84		68.22	68.4		100.72	77.32
menC	32.84	41.53		48.13	46.15		10.5	8.88
menD	22.54	22.2		17.39	20.38		74.16	36.81
menE	11.99	14.89		18.14	19.24		2.88	4.32
menF	51.53	47.51		32.11	28.78		130.36	100.38
menH	7.93	10.34		8.66	10.12		25.59	15.99
menI	61.42	61.73		54.42	61.55		25.62	51.93
mepA	44.83	46.4		57.33	60.74		151.26	113.13
mepH	29.53	28.64		17.46	20.48		27.98	44.19
mepK	125.22	136.51		154.17	149.97		90.76	97.07
mepM	78.74	90.53		62.85	60.18		55.05	55.52
mepS	1096.08	1137.86		974.77	1000.79		1356.82	1542.42
metA	5.02	3.38		4.99	5.15		6.72	11.8
metB	14.31	14.42		14.14	15.4		16.71	18.99
metC	27.42	26.68		33.93	30.59		35.48	61.18
metE	26.33	27.43		23.43	22.39		10.04	36.79
metF	8.22	7.64		9.84	10.5		11.14	21.7
metG	123.16	116.79		163.87	181.57		382.03	264.01
metH	55.97	59.48		49.58	48.21		25.87	43.37
metI	35.45	35.42		44.58	42.53		31.72	37.48
metJ	163.01	154.04		207.3	207.99		177.18	138.77
metK	68.06	68.53		124.33	158.13		544.25	188.34
metL	32.04	34.04		30.65	33.77		38.26	39.37
metN	13.97	14.47		21.53	23.69		31.45	29.01
metQ	126.52	131.63		161.31	164.07		94.6	132.97
metR	4.11	5.41		8.09	7.09		8.07	7.54
metT	330.68	322.5		411.89	464.92		524.44	515.15
metU	582.94	519.02		761.54	831.39		652.75	564.38
metV	31.54	37.43		32.09	42.06		209.97	145.69
metW	112.03	133.84		130.6	138.33		655.08	426.55
metY	27.26	10.06		20.09	12.15		56.95	69.86
metZ	105.86	120.33		109.39	111.93		469.46	329.14
mfd	24.65	23.9		26.31	26.51		24.21	37.49
mglA	44.66	50.05		22.49	33.86		95.07	346.15
mglB	418.83	456.6		152.37	173.95		686.03	2946.5
mglC	23.36	22.19		9.69	13.6		39.34	110.91
mgrB	202.95	193.74		4.18	5.37		6.75	6.53
mgrR	26	20.67		4.02	4.22		3.17	3.94
mgsA	768.7	748.65		632.21	585.44		182.69	513.57
mgtA	9.92	11.72		2.34	1.89		4.1	3.45
mgtL	101.57	89.88		1.59	4.66		6.89	8.1
mgtS	76.31	71.38		3.43	1.81		6.89	8.12
mgtT	68.39	61.83		1.3	1.03		3.74	6.18
mhpA	0.77	0.55		0.36	0.28		5.08	5.94
mhpB	1.01	0.52		0.64	0.69		5.1	4.93
mhpC	1.26	1.34		0.87	0.73		5.53	5.5
mhpD	1.17	0.93		0.37	0.56		4.11	2.83
mhpE	1.95	1.17		1.12	0.64		2	6
mhpF	0.87	0.36		0.23	0.15		1.07	2.35
mhpR	10.07	10.88		12.88	14.61		84.99	202.05
mhpT	1.44	1.45		1.06	0.96		2.49	3.21
miaA	535.26	505.91		469.35	415.08		200.42	222.21
miaB	65.5	66.23		97.86	107.35		167.74	71.39
micA	381.89	390.55		401.49	397.56		1081.8	1090.96
micC	1.78	1.84		0.58	0.49		2.98	2.36
micF	12.35	6.58		3.23	0		2.22	6.58
micL	27.22	20.65		11.55	10.35		7.5	7.38
minC	246.82	239.95		167.64	169.22		135.16	229.76
minD	611.8	588.25		297.46	315.06		231.44	361.36
minE	506.57	542.91		276.12	274.81		196.85	313.35
mioC	136.73	137.52		134.92	147.38		183.03	141.84
mipA	318.31	340.46		560.08	570.87		198.45	227.16
mlaA	313.24	316.21		177.3	193.01		196.83	166.32
mlaB	236.32	244.65		134.26	136.23		220.7	192.12
mlaC	302.66	303.24		182.41	187.93		265.28	250.34
mlaD	118.51	114.82		74.39	76.14		99.04	86.32
mlaE	67.01	73.24		43.39	46.05		48.69	35.69
mlaF	165.56	157.61		99.53	96.03		90.75	123.67
mlc	15.76	16.33		11.93	9.98		6.37	11.25
mliC	13.08	13.35		6.64	6.82		3.7	5.57
mlrA	6.09	4.35		4.32	3.88		40.07	37.83
mltA	23.55	26.67		28.49	32.02		57.76	26.93
mltB	6.49	5.45		6.37	6.3		19.01	13.21
mltC	26.34	27.08		33.48	39.75		61.09	58.9
mltD	92.37	97.93		117.56	142.34		284.98	159.04
mltF	6.21	6.04		8.9	10.89		24.39	11
mltG	15.6	17.44		15.27	17.27		23.47	15.28
mmuM	43.17	42.45		27.66	23.82		18.44	30.07
mmuP	4.78	4.56		2.91	3.15		6.29	7.23
mnaT	50.28	56.07		32.91	34.94		24.07	36.99
mngA	0.28	0.23		0.04	0.1		1.09	0.72
mngB	3.01	2.93		1.57	1.78		5.07	3.98
mngR	11.16	13.06		10.3	10.43		10.81	10.59
mnmA	51.4	58.1		93.19	113.19		212.46	85
mnmC	23.76	25.41		31.33	32.37		78.22	39.98
mnmE	29.3	28.22		30.93	39.83		71.04	39.63
mnmG	26.19	28.9		43.27	56.11		87.3	26.66
mntH	13.73	11.09		9.45	10.32		31.52	55.31
mntP	7.75	8.16		5.31	8.03		57.78	5.01
mntR	10.83	12.59		14.51	14.22		20.42	22.47
mntS	51.26	49.64		58.13	53.14		38.96	141.2
moaA	48.2	50.18		28.95	33.35		28.96	74.08
moaB	98.65	107.53		45.86	40.97		41.29	88.24
moaC	54.96	56.82		28.07	29.99		25.37	50.26
moaD	36.46	33.57		16.07	19.89		15.81	23.02
moaE	16.96	14.05		8.54	11.24		8.63	14.38
mobA	23.35	19.87		16.23	15.04		9.97	17.9
mobB	7.72	6.64		6.06	6.27		5.41	5.55
mocA	18.77	15.57		6.01	6.81		99.1	58.27
modA	269.19	248.75		111.41	109.54		48.08	120.89
modB	53.72	49.83		27.84	22.66		13.34	32.55
modC	29.32	29.62		21.49	23.6		16.02	24.78
modE	33.88	33.89		29	28.3		27.97	29.35
modF	44.01	49.87		53.96	48.29		18.54	44.03
moeA	67.75	68.89		54.31	49.95		49.02	42.81
moeB	64.05	60.15		45.7	48.7		49.23	41.61
mog	117.05	123.51		96.07	99.05		59.69	69.54
mokA	4.5	3.56		4.57	5.77		6.26	5.79
mokB	97.92	96.97		82.07	65.94		146.9	114.52
mokC	32.87	34.54		21.11	19.65		21.27	22.7
motA	514.23	513.43		326.08	317.62		227.62	296.29
motB	273.29	284.21		188.7	184.8		174.91	174.68
motR	330	356.28		245.33	246.15		177.3	197.72
mpaA	44.11	44.34		37.11	29.2		59.5	72.26
mpl	117.47	123.01		117.38	118.82		89.72	72.89
mppA	79.33	94.52		78.81	80.61		102.42	114.4
mprA	219.74	203.01		259.26	260.5		222.58	182.51
mqo	8.94	12.16		26.48	31.81		95.9	53.27
mqsA	54	51.5		24.15	27.94		56.78	43.35
mqsR	34.87	37.15		18.67	21.32		50.49	36.22
mraY	34.04	35.18		33.73	31.95		28.92	37.35
mraZ	140.02	153.11		106.17	103.41		120.32	121.01
mrcA	8.38	9.11		14.06	19.58		24.39	11.15
mrcB	29.52	28.74		32.35	33.13		40.11	29.43
mrdA	23.6	22.49		38.22	44.73		67.7	35.24
mrdB	30.14	26.97		32.47	35.19		63.35	33.85
mreB	437.76	454.42		484.39	514.37		568.63	404.27
mreC	83.61	88.56		142.92	148.99		242.98	148.32
mreD	42.47	45.46		72.72	75.28		137.39	84.43
mrp	309.91	296.64		289.28	314.27		296.95	322.29
mrr	30.4	27.19		15.85	17.23		11.19	12.76
msbA	78.21	79.21		98.63	113.73		137.17	87.31
mscK	21.65	20.21		26.72	27.42		34.78	24.36
mscL	256.92	256.38		122.75	121.04		472.21	371.58
mscM	24.87	25.16		26.41	26.78		22.89	20.35
mscS	77.18	57.27		58.4	59.83		539.22	102.2
msrA	143.65	129.76		63.76	58.51		84.35	102.94
msrB	61.12	66.5		104.32	115.56		186.75	180.75
msrC	284.36	293.86		264.58	239.75		234.67	395.67
msrP	9.48	8.87		4.23	4.17		24.24	17.65
msrQ	5.17	3.24		2.8	2.49		14.54	8.7
msyB	23.87	20.83		14.9	20.2		85.77	92.72
mtfA	122.27	134.68		131.35	142.88		95.88	271.89
mtgA	100.33	93.88		4.07	5.11		20.66	16.2
mtlA	61.08	59.35		20.52	23.26		38.6	31.01
mtlD	157.68	167.09		92.03	88.96		217.91	167.86
mtlR	100.45	108.52		51.34	56.61		119.18	92.71
mtn	226.35	219.48		234.45	225.82		156.56	146.16
mtr	39.55	44.42		41.33	46.81		78.53	80.74
mug	34.84	31.29		21.91	21.9		104.68	41.92
mukB	99.75	98.07		70.59	73.87		48.93	84.42
mukE	74.85	78.59		55.62	67.45		42.66	51.86
mukF	35.39	37.15		25.4	27.73		23.54	26.28
murA	146.82	148.71		126.04	131.06		149.45	170.41
murB	20.22	22.34		20.61	19.83		20.8	18.06
murC	87.97	89.93		101.42	109.5		92.15	129.72
murD	43.82	39.83		38.13	39.95		33.56	61.85
murE	69.85	74.72		53.28	54.18		63.46	67.98
murF	75.85	72.19		57.85	59.56		59.27	75.93
murG	48.24	51.33		55.69	54.94		52.74	75.49
murI	75.83	70.24		75.26	73.42		50.05	39.89
murJ	12.23	12.72		15.23	21.88		30.97	18.71
murP	19.33	22.15		16.71	15.05		8.38	15.87
murQ	56.95	64.98		55.84	56.46		18.24	33.42
murR	15.32	15.31		10.44	14.39		3.74	7.11
mutH	15.81	16.46		11.3	12.36		26.17	28.59
mutL	43.87	41.04		58.37	49.76		40.35	35.03
mutM	4.74	3.98		5.12	5.09		6.61	5.16
mutS	62.04	63.71		61.96	64.27		76.18	65.13
mutT	15.69	13.49		14.16	14.12		18.14	24
mutY	51.41	54.83		48.79	51.67		65.86	68.36
mzrA	54.76	56.61		83.04	81.43		90.06	74.43
nac	3.11	2.49		0.89	1.71		6.2	3.29
nadA	10.09	9.02		5.82	7.22		11.45	9.68
nadB	4.01	3.51		3.35	2.89		7.48	7.77
nadC	64.25	58.28		43	44.88		27.58	35.56
nadD	31.15	28.21		34.57	36.43		77.39	61.51
nadE	169.02	163.74		105.1	109.52		61.55	85.36
nadK	102.4	88.7		61.75	63.23		93.44	99.93
nadR	51.26	50.74		30.48	34.39		38.18	58.72
nagA	108.27	108.98		99.58	96.46		76.69	100.52
nagB	189.37	189.65		240.54	262.74		162.27	238.11
nagC	98.29	95.27		91.07	87.88		102.62	113.85
nagE	319.12	329.79		288.26	292.98		137.23	373.95
nagK	52.15	48.97		48.82	48.75		58.7	71.88
nagZ	56.87	56.83		45.74	51.93		95.23	69.18
nanA	105.89	111.96		57.8	59.07		33.18	74.97
nanC	3.15	2.05		0.93	1.23		5.02	8.91
nanE	48.81	46.79		16.07	18.23		22.78	39.74
nanK	32.05	36.5		11.53	11.03		25.97	38.07
nanM	5.6	4.44		2.31	2.58		27.02	13.14
nanQ	40.45	35.13		11.88	13.27		33.14	41.38
nanR	100.7	105.91		88.01	79.56		49.8	71.29
nanS	1.33	1.23		0.61	1.17		15.39	4.59
nanT	42.97	46		14.53	15.93		17.83	37.41
nanX	3.82	4.22		2.45	1.58		10.89	12.42
nanY	10.6	10.19		7.47	7.27		22.88	31.42
napA	11.77	13.43		2.69	3.13		6.84	4.86
napB	5.85	10.38		2.67	2		6.25	4.81
napC	20	18.6		9.73	8.8		17.22	21.18
napD	8.25	7.11		4.4	2.73		3.29	3.81
napF	4.6	7.09		3.17	3.45		4.55	4.77
napG	5.23	4.92		1.23	1.4		3.63	4.18
napH	3.94	3.94		0.85	0.85		2.97	3.01
narG	1.68	2.62		0.57	0.68		3.59	1.98
narH	2.1	2.6		1.69	1.08		4.54	3.59
narI	2.95	1.96		1.05	1.41		5.77	3.58
narJ	5.24	2.75		1.54	1.52		3.84	3.78
narK	1.35	1.55		0.31	0.25		0.85	0.77
narL	113.17	115.53		23.04	21.67		42.19	36.11
narP	27.13	26.37		16.05	16.88		44.24	15.25
narQ	18.51	18.1		5.28	6.22		33.29	16.63
narS	0.32	0		0	0.49		1.91	1.07
narU	1.08	1.22		0.79	0.49		1.31	1.04
narV	1.42	2.19		1.55	1.53		2.55	3.05
narW	1.37	1.2		0.52	1.4		1.9	2.2
narX	32.78	29.36		5.49	5.25		20.8	20.78
narY	2.28	1.94		1.15	1.65		3.94	2.08
narZ	2.47	2.35		1.13	1.34		3.57	2.8
ndh	63.91	50.85		193.43	186.96		91.71	19.27
ndk	94.42	120.85		577.37	705.37		1158.49	815.16
nei	23.42	25.31		18.91	17.2		17.55	18.42
nemA	34.5	36.39		30.67	35.33		95.81	54.29
nemR	16.07	17.61		15.94	14.81		29.92	26.02
nepI	7.75	8.49		11.1	14.34		20.84	8.24
nfeF	69.8	66.89		65.22	66.7		18.63	97.53
nfeR	120.39	137		107.3	108.82		160.23	120.76
nfi	68.15	66.64		78.02	72.16		124.17	108.23
nfo	113.4	106.17		72.8	70.52		95.46	135.2
nfrA	5.91	4.82		4.55	5.37		34.97	8.78
nfrB	2.01	2.67		1.32	2.97		12.06	3.87
nfsA	105.49	113.48		128.95	133.19		42.08	57.92
nfsB	380.92	388.35		509.25	467.06		74.04	255.02
nfuA	225.22	219.12		152.91	172.77		81.01	303.98
nhaA	95.3	87.1		79.47	88.42		115.06	91.97
nhaB	66.71	69.09		31.77	36.31		66.71	64.67
nhaR	28.83	31.65		22.06	23.73		42.74	39.92
nhoA	3.02	1.74		2.26	2.64		3.57	4.06
nikA	0.64	1.06		1.08	1.61		3.49	1.87
nikB	1.01	0.86		1.32	1.41		2.58	2.57
nikC	0.81	1.1		1.26	1.77		4.07	2.1
nikD	2.38	2.51		1.97	1.39		5.54	2.54
nikE	3.68	3.59		2.58	2.88		5.1	5.31
nikR	26.3	29.07		16.73	19.11		27.06	20.51
nimR	12.79	14.29		10.09	8.19		10.12	8.14
nimT	42.56	41.56		38.52	39.11		30.38	12.69
ninE	0.12	0.72		0.63	0		1.57	0.9
nirB	1.65	1.76		0.9	0.79		2.65	1.85
nirC	4.56	5.53		4.31	3.72		5.02	3.63
nirD	2.42	1.75		0.85	0.66		1.39	1.81
nlpA	20.31	16.96		10.28	9.86		25.1	34.55
nlpC	87.76	79.6		38.77	39.12		75.84	72.14
nlpD	133.94	138.5		98.77	101.91		158.87	277.37
nlpE	62.71	59.43		37.02	34.14		83.87	88.18
nlpI	664.43	623.21		601.81	634.57		1393.37	966.3
nmpC	939.05	894.98		512.78	562.88		32.25	168.59
nnr	19.79	20.12		14.31	12.61		43.28	37.77
nohA	0.63	0.32		0.41	0.16		2.21	0.38
nohD	0.94	0.9		0.39	0.59		2.54	1.8
norR	12.4	10.42		6.52	4.67		11.86	9.71
norV	1.2	2.25		1.25	1.69		12.22	7.32
norW	1.8	1.1		1.35	1.44		8.34	4.07
npr	41.63	42.36		33.69	37.3		61.6	100.04
nrdA	97.18	101.11		140.13	166.19		154.25	146.6
nrdB	91.33	84.93		83.12	92.08		149.18	101.04
nrdD	51.36	52.97		55.25	67.14		84.73	105.03
nrdE	9.85	11.27		26.66	24.59		12.77	50.87
nrdF	13.88	9.37		17.68	18.18		10.47	40.34
nrdG	14.18	14.74		12.38	12.34		32.74	31.6
nrdH	18.75	14.84		41.49	40.81		11.86	112.18
nrdI	11.71	13.45		39	35.59		13.84	96.67
nrdR	29.13	27.15		24.97	28.15		26.11	18.66
nrfA	2.71	2.26		2.65	3.09		5.82	6.39
nrfB	1.26	1.01		2.24	1.94		5.33	4.32
nrfC	0.82	1.27		0.9	0.37		3.51	1.56
nrfD	0.1	0.19		0.18	0.08		2.01	1.53
nrfE	0.48	0.44		0.48	0.21		1.7	1.41
nrfF	0.62	0.05		0.39	0.14		2.05	2.05
nrfG	2.12	1.54		1.15	1.36		3.85	1.79
nsrR	30.16	32.03		18.06	22.13		17.87	23.25
nth	17.31	14.69		37.81	36.98		22.34	30.53
nudB	66.48	68.79		68.3	70.54		62.33	52.66
nudC	26.78	27.98		26.71	24.92		48.72	48.73
nudE	71.86	68.71		95.91	87.75		152.86	145.7
nudF	66.97	69.47		52.69	52.26		144.43	130.44
nudG	35.28	33.94		18.54	19.76		15.01	16.24
[truncated: 2,644 more rows]

## Sheet: Table S5-2
Table S5-2. The level of detected proteins in W3110, SSA05102, and YMA11623.
Protein	W3110 typeA (Scaled abundance )						SSA05102 (Scaled abundance )						YMA11623 (Scaled abundance )
	Experiment #1	Experiment #2	Experiment #3	Average	SD		Experiment #1	Experiment #2	Experiment #3	Average	SD		Experiment #1	Experiment #2	Experiment #3	Average	SD
Aas	121.7	112.2	113.5	115.8	5.15073		105.8	121.3	99.4	108.833	11.2607		71.9	82.7	71.6	75.4	6.32376
AccA	119.3	94.9	110.5	108.233	12.3569		110.2	127.1	84.2	107.167	21.6103		79.6	94.6	79.6	84.6	8.66025
AccB	99	83.9	129.4	104.1	23.1748		112.2	109.1	84.9	102.067	14.9474		103.5	98.9	79.2	93.8667	12.9083
AccC	114.7	124.5	110.1	116.433	7.35482		96.3	103.3	89.8	96.4667	6.75154		84.3	96.1	80.9	87.1	7.97747
AccD	110	110.2	94.2	104.8	9.18041		110.8	108.7	104.6	108.033	3.15331		77.7	87.1	96.5	87.1	9.4
AceA	132.3	132	130.4	131.567	1.02144		102.8	99.7	120.9	107.8	11.4503		47.7	52	82.1	60.6	18.7433
AceB	148.2	131.6	164.2	148	16.3009		100.4	111.3	97.6	103.1	7.23809		48	43.6	55	48.8667	5.7492
AceE	106.9	98.2	105.1	103.4	4.59239		103.5	94.1	94.6	97.4	5.28867		101.6	107	89.1	99.2333	9.18168
AceF	107.9	99.5	89.1	98.8333	9.41771		99.3	88	108	98.4333	10.0281		103.9	101.1	103.1	102.7	1.44222
AckA	156.2	129.9	134.7	140.267	14.0058		96.9	111.4	104	104.1	7.25052		50.8	54	62.2	55.6667	5.87991
AcnA	110.8	94	95.7	100.167	9.24788		87.2	100	82.3	89.8333	9.13911		117.4	95.1	117.4	109.967	12.8749
AcnB	61	63.7	60.8	61.8333	1.61967		89.7	85.8	101.1	92.2	7.95047		141.4	131.4	165.1	145.967	17.3079
AcpP	94.1	99.7	105.9	99.9	5.90254		100.2	93.3	95.9	96.4667	3.48473		82.8	110.1	118	103.633	18.4695
AcrA	107	89.1	91.6	95.9	9.69381		100.8	99.8	97.8	99.4667	1.52753		113.1	103.6	97.3	104.667	7.95383
AcrB	103.6	103.6	107.4	104.867	2.19393		96.4	105.7	98.2	100.1	4.93254		100.8	93.8	90.6	95.0667	5.21664
AcrR	83.2	123.4	77.3	94.6333	25.0867		81.3	95.2	89.7	88.7333	7.00024		115.5	124.5	109.9	116.633	7.36569
Acs	28.9	35.3	27	30.4	4.34856		42.1	47.3	44.6	44.6667	2.60064		227.9	233.5	213.4	224.933	10.3732
ActP	21.3	25.9	31.6	26.2667	5.15978		55.1	54.7	72.5	60.7667	10.1633		219.7	187	232.3	213	23.3814
AcuI	90.1	93.5	90.5	91.3667	1.85831		109.9	111.7	98.1	106.567	7.38738		106.6	105.2	94.4	102.067	6.67633
Add	108.4	93.5	113.2	105.033	10.2725		123.7	141.8	113.4	126.3	14.3774		71.5	67.6	67	68.7	2.44336
Ade	112.4	128.6	134.7	125.233	11.5249		95.1	101.6	88.5	95.0667	6.55006		69.5	91.4	78.2	79.7	11.0268
AdhE	58.2	68.3	65.6	64.0333	5.22909		115.6	105.1	102.8	107.833	6.82373		138.9	115.6	129.8	128.1	11.7427
AdhP	90.9	42.1	60.7	64.5667	24.6287		76	93.9	103.6	91.1667	14.0015		194.6	139.1	99.1	144.267	47.9592
Adk	110.5	122.1	108.7	113.767	7.27278		95.5	97.3	93.8	95.5333	1.75024		101.1	90.9	80	90.6667	10.5519
AegA	0	0	0	0	0		0	0	0	0	0		0	0	0	0	0
Aer	108.9	133.1	100.3	114.1	17.0071		107.6	81.3	93.7	94.2	13.1571		92.1	92.4	90.6	91.7	0.964365
AgaR	108.1	117.5	119.6	115.067	6.124		107	74.3	99.8	93.7	17.1823		81.6	101.7	90.3	91.2	10.0802
AgaV	89.1	82.1	82.5	84.5667	3.93107		106.1	127.4	86.5	106.667	20.4559		116.1	90.9	119.4	108.8	15.5894
Agp	64.5	92	105.3	87.2667	20.8078		119.7	103.5	122.1	115.1	10.1173		118.8	88.2	86	97.6667	18.335
AhpC	103.7	115.8	91.6	103.7	12.1		105.1	101.8	108.9	105.267	3.55293		98.8	84.3	89.8	90.9667	7.32006
AhpF	100.7	101.6	103.6	101.967	1.48436		114.6	117.9	92.5	108.333	13.811		92.1	93.6	83.3	89.6667	5.56447
Ahr	89	70.3	93.2	84.1667	12.1911		63.2	70.6	65.5	66.4333	3.78726		174.8	177.6	95.8	149.4	46.4401
AidB	173.6	136.3	186.7	165.533	26.1504		103.2	102.6	106.9	104.233	2.32881		44.1	29.3	17.4	30.2667	13.3762
AlaA	84.5	80.1	90	84.8667	4.96017		124.5	130.8	118.7	124.667	6.05172		85.8	92.3	93.3	90.4667	4.07226
AlaC	92.5	96.8	105.1	98.1333	6.40495		100.9	88.9	111.9	100.567	11.5036		102.3	97.8	103.7	101.267	3.08275
AlaS	98.7	102.2	97.6	99.5	2.40208		103.7	92.1	95.6	97.1333	5.95007		93.5	96.5	120.1	103.367	14.5689
AldA	51.3	58.5	56.1	55.3	3.66606		99.5	101.5	108.4	103.133	4.6694		142.7	135.1	147	141.6	6.02578
AldB	99.6	100.4	139.3	113.1	22.6934		70.4	94.5	105.9	90.2667	18.1247		52.8	88.1	149.1	96.6667	48.7182
AlkA	0	0	0	0	0		0	0	0	0	0		0	0	0	0	0
AllE	130.1	116.6	77.3	108	27.4305		82	92.1	99.2	91.1	8.64349		121.7	63.5	117.4	100.867	32.4318
AllR	98.5	83.5	90.9	90.9667	7.50022		102	109.2	91.1	100.767	9.11281		96.1	114.9	113.8	108.267	10.551
Alr	124.4	95.6	95.2	105.067	16.7444		106.8	113.1	89.4	103.1	12.2756		68.2	117.5	89.9	91.8667	24.7088
AlsB	0	0	0	0	0		0	212.7	0	70.9	122.802		0	269.4	418	229.133	211.889
AmiA	95.3	95	74.9	88.4	11.6923		97.7	89.6	94.6	93.9667	4.08697		117.6	85.3	150	117.633	32.35
AmiB	108.8	85.1	85.8	93.2333	13.4857		81.8	95.7	108.5	95.3333	13.3538		111.2	88.8	134.4	111.467	22.8012
AmiC	107.6	120.4	115	114.333	6.42599		77.1	102	82	87.0333	13.191		87.4	90	118.4	98.6	17.1965
AmiD	76.9	45.8	54.6	59.1	16.0309		104.3	87.1	123.4	104.933	18.1583		136.6	95	176.4	136	40.7033
Amn	87	96.4	74.7	86.0333	10.8822		112.5	125.2	89.7	109.133	17.9879		89.3	117.9	107.2	104.8	14.4503
AmpC	110.1	93.3	111.1	104.833	10.0007		120.6	103.9	71.3	98.6	25.0737		97.1	107.9	84.8	96.6	11.5581
AmpD	70.9	90.6	139.6	100.367	35.376		82	97.3	116.4	98.5667	17.2349		85.8	106.2	111.3	101.1	13.4933
AmpH	118.8	160.7	125.4	134.967	22.5287		85.3	87.6	92	88.3	3.40441		76.4	75.8	78	76.7333	1.13725
AmyA	63.1	98.2	78.1	79.8	17.6116		41.5	101	81	74.5	30.2779		141.5	135.4	160.2	145.7	12.9225
AnmK	96.5	80.8	96.3	91.2	9.00722		117.1	139.7	90.9	115.9	24.4221		84.3	92.4	102	92.9	8.86059
AnsA	91.7	94.7	94	93.4667	1.5695		95.6	99.6	92.9	96.0333	3.37095		135.2	116.7	79.7	110.533	28.2592
ApaH	146.7	64	94.9	101.867	41.7878		90.5	110.7	100.6	100.6	10.1		123.1	82.3	87.1	97.5	22.2998
AphA	89.9	169.6	94.4	117.967	44.7724		67.7	116.5	96.6	93.6	24.5379		79.4	86.9	98.9	88.4	9.83616
Apt	101.6	131	93	108.533	19.9262		93.2	96.3	89.5	93	3.40441		89.5	99.4	106.5	98.4667	8.53834
AraC	99.8	93.9	93.1	95.6	3.65923		120.1	141.8	87.3	116.4	27.4377		82.3	80.3	101.3	87.9667	11.5902
ArcA	134.6	138.3	139.9	137.6	2.71846		173.1	155.3	157.6	162	9.68143		0.4	0.3	0.5	0.4	0.1
ArcB	157.3	96.7	130.5	128.167	30.3673		58.7	49.5	52	53.4	4.7571		105.3	128.5	121.4	118.4	11.8874
ArgB	102.5	97.9	85.6	95.3333	8.73747		97.9	113.6	131.1	114.2	16.6081		68.9	109.5	93.1	90.5	20.4245
ArgC	105.2	0	99.2	68.1333	59.0814		191.1	70.6	133.4	131.7	60.268		0	135.1	165.5	100.2	88.0969
ArgD	63.1	68.5	73.5	68.3667	5.20128		145.4	135.1	113.4	131.3	16.3349		105.1	80.8	115.1	100.333	17.6398
ArgE	81.7	129.6	85.1	98.8	26.7277		119.1	135.8	106.5	120.467	14.6977		81.1	57.1	104.1	80.7667	23.5018
ArgG	65.8	66	72.2	68	3.63868		85.3	82.9	90.8	86.3333	4.0501		142.7	118.7	175.7	145.7	28.6182
ArgH	85.5	50.5	81	72.3333	19.0416		96	105.5	99.3	100.267	4.82321		165.9	123.3	93.2	127.467	36.5287
ArgI	103.8	90.7	121.3	105.267	15.3526		63.7	104	83.5	83.7333	20.151		143	105.1	84.8	110.967	29.5402
ArgP	81.8	93.6	96.4	90.6	7.74855		101.9	104.2	93	99.7	5.91523		76.2	117.8	135.1	109.7	30.2739
ArgR	96.6	72.2	59.6	76.1333	18.811		77.7	106.5	134.9	106.367	28.6002		174.6	132.4	45.5	117.5	65.8271
ArgS	104	103.7	108.8	105.5	2.86182		104.4	111.2	90.6	102.067	10.4963		93.1	108.2	75.9	92.4	16.1614
ArgT	29.3	50	37.9	39.0667	10.3992		84.8	66	57.6	69.4667	13.9274		162.6	172.9	238.9	191.467	41.4
ArnA	0	0	0	0	0		0	0	0	0	0		432	0	468	300	260.43
ArnB	111	0	0	37	64.0859		0	0	0	0	0		244.8	0	544.2	263	272.556
AroA	100.2	70.9	77.2	82.7667	15.4228		106.9	102.2	93.8	100.967	6.63652		104	117	127.8	116.267	11.9169
AroB	121.7	104.5	94.1	106.767	13.9389		105.3	106	97.8	103.033	4.54569		69.5	94.7	106.5	90.2333	18.9001
AroC	66.3	84	56.9	69.0667	13.7602		112.7	110	88	103.567	13.5486		99.5	76.7	206	127.4	69.0176
AroD	99.5	118.7	85.5	101.233	16.6677		110.3	125.3	93	109.533	16.1636		84.3	104	79.3	89.2	13.0587
AroE	105.2	133.1	101.5	113.267	17.2755		90.4	85.2	91.2	88.9333	3.25781		101.2	122.6	69.7	97.8333	26.6102
AroF	109.2	135.6	106.7	117.167	16.0126		110.5	108.8	93.2	104.167	9.53537		91.8	65.4	78.9	78.7	13.2011
AroG	65.1	78.6	78.3	74	7.70909		111.5	101.4	93.1	102	9.21466		129.6	134.6	107.6	123.933	14.3643
AroH	117.2	108	98.5	107.9	9.3504		105.6	113.2	98.2	105.667	7.50022		94	96.5	68.9	86.4667	15.2644
AroK	133	87.3	116.4	112.233	23.1332		96.9	92.2	99.4	96.1667	3.65559		95.7	100	79.2	91.6333	10.9801
AroL	64.9	145.6	105.7	105.4	40.3508		49.3	243.4	43.7	112.133	113.715		47.7	128.5	71.2	82.4667	41.5616
AroM	22.9	26.4	22.3	23.8667	2.21435		21.3	141.8	65.8	76.3	60.9323		300.5	119.1	179.8	199.8	92.339
ArsC	62.5	77.9	64.9	68.4333	8.28573		107.1	91.9	158.7	119.233	35.0139		146	142.1	48.8	112.3	55.0272
ArtI	52.1	74.2	60.9	62.4	11.1261		97.7	97.5	106.4	100.533	5.08167		138.9	117.5	154.8	137.067	18.7175
ArtJ	76.1	51.3	50.8	59.4	14.4648		147.8	117	137.9	134.233	15.724		116.8	87.3	115	106.367	16.5367
ArtM	72.6	83.9	161	105.833	48.1087		59.4	108	101.5	89.6333	26.3838		81	102	130.7	104.567	24.9492
ArtP	68.3	103.9	73.7	81.9667	19.1858		107.2	105.6	77.3	96.7	16.8199		111.7	117.2	135.3	121.4	12.3479
ArtQ	91.3	86.2	56.6	78.0333	18.7362		127.2	89.3	80.5	99	24.8151		107.9	133.7	127.2	122.933	13.4188
AscG	125.6	96.7	87.7	103.333	19.8016		83.3	118.3	107.8	103.133	17.9606		111.1	84.1	85.4	93.5333	15.2271
Asd	64.6	99.3	69.4	77.7667	18.8022		113.3	97.9	100.9	104.033	8.16415		104.6	124.8	125.3	118.233	11.8095
AsmA	104.6	40.5	105.2	83.4333	37.1826		115	102.2	109.8	109	6.43739		108.3	97.3	117.1	107.567	9.92035
AsnA	75.3	90.1	76.7	80.7	8.17068		106.6	106.7	123.3	112.2	9.61301		117.1	108.1	95.9	107.033	10.6402
AsnB	55.3	60.1	59.2	58.2	2.55147		121.1	122.2	105.7	116.333	9.22515		118.8	135.3	122.4	125.5	8.67583
AsnC	109.9	94.2	113.4	105.833	10.2256		91.3	123.4	114.8	109.833	16.6164		98.1	112.2	42.8	84.3667	36.6816
AsnS	86.4	88.5	92.7	89.2	3.2078		102.6	110.1	76.6	96.4333	17.5808		109.6	115.9	117.6	114.367	4.21466
AspA	79.3	129.1	112.2	106.867	25.3248		88.6	106.7	108.2	101.167	10.9089		92.8	89.7	93.5	92	2.02237
AspC	65.8	68.6	75.6	70	5.04777		92	110.8	89.7	97.5	11.5754		129.1	124	144.3	132.467	10.5605
AspS	102.3	98.3	108.2	102.933	4.98029		103.1	113.8	114.1	110.333	6.26605		88.3	97.1	74.9	86.7667	11.1791
AstA	51.5	85.3	47.2	61.3333	20.8668		22.8	41.8	30.1	31.5667	9.58454		249.9	172	199.3	207.067	39.5265
AstB	14.1	5.4	0	6.5	7.11407		15.7	16.5	2.6	11.6	7.80449		419.3	172.5	253.8	281.867	125.771
AstC	26.5	27.6	30.1	28.0667	1.84481		28.5	36.2	26.5	30.4	5.12152		272.2	252.4	200.1	241.567	37.2508
AstD	47.7	54	60.5	54.0667	6.40026		36.6	47.2	34.5	39.4333	6.80759		232.1	199.3	188	206.467	22.9068
AstE	0	0	87.8	29.2667	50.6914		0	0	0	0	0		812.2	0	0	270.733	468.924
AtpA	104.5	104.9	104.1	104.5	0.4		98.6	117.4	108.8	108.267	9.41134		85.8	87.2	88.6	87.2	1.4
AtpB	127.1	29.9	142.8	99.9333	61.1565		190.4	103.5	74.7	122.867	60.2322		92.7	13.8	125.1	77.2	57.246
AtpC	139.2	72.1	98.4	103.233	33.8101		118.7	136.2	73.1	109.333	32.5761		107.6	77.6	77.1	87.4333	17.4666
AtpD	106.8	110.7	100.8	106.1	4.98698		113.6	112.4	103.3	109.767	5.63235		80.8	87.5	84.1	84.1333	3.35012
AtpE	12.2	48.4	37.4	32.6667	18.5584		90.8	94.3	124.3	103.133	18.4142		118.2	201.6	172.8	164.2	42.3599
AtpF	120.3	88.2	104.3	104.267	16.05		119.4	116.6	108.6	114.867	5.60476		78.6	78.7	85.2	80.8333	3.78197
AtpG	110.1	105.2	97.5	104.267	6.35164		118.8	101.2	112.5	110.833	8.91759		88.9	82	83.7	84.8667	3.5949
AtpH	92.3	139.4	90.6	107.433	27.697		114	120.6	87.7	107.433	17.4053		69.7	89.1	96.7	85.1667	13.9231
AvtA	88.4	92.9	77.6	86.3	7.86321		99.1	97.3	88.8	95.0667	5.50121		95.7	134.5	125.7	118.633	20.3424
AzoR	109.2	91.2	86.3	95.5667	12.0583		117	102.3	111.7	110.333	7.44468		92.5	99.6	90.2	94.1	4.9
BaeR	145	184.4	162.8	164.067	19.7305		98	140	169.8	135.933	36.0723		0	0	0	0	0
BaeS	101.8	141.6	103.9	115.767	22.3969		0	0	0	0	0		100.8	201.7	250.1	184.2	76.1729
BamA	65.1	79	68.8	70.9667	7.19884		122.1	124.4	120.5	122.333	1.96044		102.9	104.2	113.1	106.733	5.55188
BamB	57.8	133	60.7	83.8333	42.6043		107.1	121.1	117.7	115.3	7.30205		94.3	98	110.3	100.867	8.37636
BamC	65.7	78.4	68.5	70.8667	6.67258		116.1	124.6	122.5	121.067	4.42757		101.3	94.6	128.2	108.033	17.7832
BamD	62.5	92	65.5	73.3333	16.2352		153.5	96	132.9	127.467	29.1325		103.5	89.5	104.8	99.2667	8.48312
BamE	78.7	70.2	73.4	74.1	4.29302		126.8	131.9	122.5	127.067	4.70567		71.7	98.3	126.5	98.8333	27.4039
BarA	170.8	117.2	139.5	142.5	26.9256		0	0	0	0	0		161.8	136.1	174.6	157.5	19.6069
BasR	257.5	75	107.1	146.533	97.431		142.9	88	229.5	153.467	71.3394		0	0	0	0	0
Bcp	97.7	127	58.3	94.3333	34.4735		139.6	140	47.7	109.1	53.1743		130	51.5	108.4	96.6333	40.5512
Bcr	155.8	81.8	60.1	99.2333	50.1753		66.3	76.9	88.5	77.2333	11.1038		128	96.7	146	123.567	24.9472
BcsE	113.6	123.9	111	116.167	6.82227		92.7	100.5	89.9	94.3667	5.49303		142.5	78.1	47.9	89.5	48.3194
BcsG	57.8	92.5	102.2	84.1667	23.3436		78.7	105.8	79.8	88.1	15.3385		125	129.4	128.6	127.667	2.34379
BdcR	112.8	101.1	112.7	108.867	6.72632		108.5	115.1	83.8	102.467	16.4992		99.4	92.2	74.3	88.6333	12.9245
BepA	102.4	117.1	105	108.167	7.84496		80.2	85.5	85.3	83.6667	3.00389		113.3	83.3	127.9	108.167	22.7388
BetA	72.9	90.8	80.1	81.2667	9.00685		127.2	112.2	105	114.8	11.3261		105.3	94.8	111.8	103.967	8.57807
BetB	78.3	69.4	80.9	76.2	6.03075		90.2	101.4	91.2	94.2667	6.19785		120.2	130.3	138	129.5	8.92693
BetI	0	484.7	0	161.567	279.842		0	0	245.4	81.8	141.682		0	0	169.9	56.6333	98.0918
BetT	75.6	58.5	65.8	66.6333	8.5804		59.4	154.3	105.7	106.467	47.4546		142	131.7	106.8	126.833	18.0976
Bfr	113.2	127.5	100.9	113.867	13.3125		79.1	97.4	77.3	84.6	11.1216		146.6	83.1	74.9	101.533	39.2436
BglA	96	107.1	96.6	99.9	6.2426		90.5	98.5	104.8	97.9333	7.16682		94.6	93.3	118.6	102.167	14.2465
BglX	110.1	93.9	94.2	99.4	9.26769		93.6	108	100.6	100.733	7.20093		96.4	101.9	101.4	99.9	3.04138
BioA	0	0	0	0	0		0	0	0	0	0		0	0	0	0	0
BioD1	72.6	117.7	80.9	90.4	24.004		95.5	51.1	85.7	77.4333	23.3258		114.5	93.7	188.2	132.133	49.6565
BioH	109.3	130.1	126	121.8	11.0177		81.8	113.4	79.6	91.6	18.9114		100.5	92.3	67.1	86.6333	17.4061
BipA	139.4	123.1	113.3	125.267	13.1842		105.6	90.1	83.5	93.0667	11.3447		80.8	92.2	72	81.6667	10.1278
BirA	102.6	134.6	105.4	114.2	17.7223		84	89	110.7	94.5667	14.1938		88.8	98.3	86.6	91.2333	6.21798
BisC	84.6	75	86.2	81.9333	6.0575		102.6	110.8	90.2	101.2	10.3711		130.1	121.4	99.2	116.9	15.9339
Blc	26.3	65.6	29.9	40.6	21.7253		177.5	45.2	209.1	143.933	86.9531		103.7	79.8	162.8	115.433	42.7259
BluR	91.5	170.2	74	111.9	51.2419		103	86.1	91.5	93.5333	8.63153		93.7	102.4	87.6	94.5667	7.43797
BolA	98.8	77.7	124.8	100.433	23.5924		101.3	97	109	102.433	6.07975		97.2	91	103.1	97.1	6.05062
BrnQ	157	0	0	52.3333	90.644		194.2	158	0	117.4	103.27		141.6	137.8	111.5	130.3	16.3918
BtsR	161.6	409.1	270.3	280.333	124.055		0	0	58.9	19.6333	34.0059		0	0	0	0	0
BtsS	126.2	224.7	125.2	158.7	57.1599		0	0	0	0	0		87.8	74.9	261.2	141.3	104.037
BtsT	271.2	315.9	304.2	297.1	23.1804		1.4	2.2	1.3	1.63333	0.493288		1.1	2.1	0.7	1.3	0.72111
BtuB	83.6	66.6	74.3	74.8333	8.51254		118.3	136.1	110	121.467	13.335		98.7	103	109.4	103.7	5.38424
BtuD	113.8	190	72.6	125.467	59.5632		67.2	48.1	68.5	61.2667	11.4212		122.2	102.2	115.4	113.267	10.1692
BtuE	74.6	92.4	74.9	80.6333	10.1913		63.2	84.8	81.3	76.4333	11.5932		192.2	130	106.7	142.967	44.2003
BtuF	158	106	96.4	120.133	33.1429		93.2	117.5	69	93.2333	24.25		111.9	74.8	73.2	86.6333	21.8962
BtuR	92.9	81.7	113.8	96.1333	16.2924		118.6	139.2	118.5	125.433	11.9224		65.3	87.6	82.4	78.4333	11.6672
Can	81.9	99.5	76.2	85.8667	12.1459		101.5	93.9	107.9	101.1	7.00857		111.6	118.9	108.7	113.067	5.25579
CarA	90.9	123.6	76.7	97.0667	24.0504		73.7	111.6	72.5	85.9333	22.2361		120.2	106.7	124.1	117	9.13072
CarB	108.5	104.9	92.6	102	8.33727		102.4	94.9	82.8	93.3667	9.88956		97.3	101	115.8	104.7	9.78928
Cbl	0	0	0	0	0		0	0	0	0	0		0	0	0	0	0
CbpA	109.6	131.6	118.6	119.933	11.0604		80.2	96.9	92.1	89.7333	8.59787		114.8	74.2	82	90.3333	21.5447
Cca	97.6	103.6	116.8	106	9.82242		98.3	76.2	106.4	93.6333	15.6315		91.1	90.1	119.9	100.367	16.9238
CcmA	174.6	0	150	108.2	94.5078		0	99.8	113.7	71.1667	62.0228		61.8	85.7	214.5	120.667	82.136
CdaR	140.9	139.5	101.2	127.2	22.5275		127	122.8	100.6	116.8	14.1859		38.5	53.6	75.8	55.9667	18.7623
Cdd	118.1	136.2	165.1	139.8	23.7059		133.8	103.4	95.6	110.933	20.1835		39.9	52.4	55.6	49.3	8.29638
Cdh	83.6	103.6	86.9	91.3667	10.7221		87.4	71.1	83	80.5	8.43267		127.9	129.5	127.2	128.2	1.17898
CecR	0	0	0	0	0		0	0	0	0	0		0	0	0	0	0
CedA	72.2	120.1	131.3	107.867	31.3918		88.4	101.6	95.4	95.1333	6.60404		107.1	114.2	69.8	97.0333	23.8504
Cfa	66.4	57.8	47.3	57.1667	9.56574		98.6	115.9	100.8	105.1	9.41754		158.1	111.2	143.8	137.7	24.0377
ChbB	75.9	132.3	77.7	95.3	32.0556		156.9	84.2	121	120.7	36.3509		78.2	53	120.7	83.9667	34.2164
ChbF	170.8	217.4	69.6	152.6	75.5622		51.5	189.7	50.3	97.1667	80.1385		43.5	107.1	0	50.2	53.8634
CheA	156.1	145.9	168.6	156.867	11.3694		28.1	32.8	31.1	30.6667	2.37978		121.6	115.3	100.4	112.433	10.8868
CheB	153.4	182.3	159.5	165.067	15.233		146	122.6	129.9	132.833	11.9726		0	6.3	0	2.1	3.63731
CheR	119.4	94.2	111.1	108.233	12.8422		88.7	94.1	81.5	88.1	6.32139		108.8	113.4	88.9	103.7	13.0219
CheW	129	165.4	91.1	128.5	37.1525		62.9	63.7	51.8	59.4667	6.65157		111.2	102.8	122	112	9.62497
CheY	148.8	186.4	121.6	152.267	32.5388		142.4	167.8	133	147.733	18.0026		0	0	0	0	0
CheZ	150.2	137	151	146.067	7.86215		143.8	146.1	141.2	143.7	2.45153		13.2	10.4	7	10.2	3.10483
ChiA	228.4	158.4	186.9	191.233	35.2006		140.3	0	0	46.7667	81.0022		154.4	31.7	0	62.0333	81.5471
ChrR	133.4	100	108.5	113.967	17.3581		116.9	83.5	65.8	88.7333	25.9489		123.9	79.5	88.4	97.2667	23.4905
CirA	9.8	12.8	8.7	10.4333	2.12211		61.4	71.5	86.6	73.1667	12.6824		110.7	48.6	490.1	216.467	238.999
ClpA	69.3	84.9	84.2	79.4667	8.81155		129.3	114.7	95.3	113.1	17.0564		91.4	102.9	128.1	107.467	18.7713
ClpB	97.6	92.7	91.3	93.8667	3.30807		99	101.9	100.1	100.333	1.46401		76	89.6	151.7	105.767	40.3565
ClpP	59.8	221.4	80.9	120.7	87.8446		133.2	92.8	84.2	103.4	26.1633		75.5	64.9	87.4	75.9333	11.2563
ClpX	104.5	103.9	94.9	101.1	5.37773		98.8	98.3	91.3	96.1333	4.19325		100.7	107.3	100.2	102.733	3.96274
ClsA	141	61	63.3	88.4333	45.5386		62.9	89.6	100.9	84.4667	19.5132		111.8	99.7	169.8	127.1	37.4709
ClsB	0	0	0	0	0		0	0	0	0	0		0	0	0	0	0
Cmk	99.3	120	105.3	108.2	10.6504		98.1	109	88.9	98.6667	10.062		88.2	99.4	91.8	93.1333	5.71781
CmoA	100	141.6	113.2	118.267	21.2578		95.8	101.3	84.9	94	8.34686		108.8	94.1	60.3	87.7333	24.8689
CmoB	107.9	98.7	123.5	110.033	12.5369		88.6	98.7	75.3	87.5333	11.7364		127.7	100.1	79.5	102.433	24.1846
CmoM	132.2	78.9	99.1	103.4	26.9089		106.2	54.6	133.7	98.1667	40.1572		93.6	87	114.6	98.4	14.4125
CnoX	124.7	78	97.5	100.067	23.4556		93.6	83	109.3	95.3	13.2322		116.1	69.5	128.2	104.6	30.9937
Cnu	195.1	99.2	127.8	140.7	49.2342		67.9	66.7	55.1	63.2333	7.06918		100.9	119.1	68.2	96.0667	25.7919
CoaA	103.7	121.6	103.8	109.7	10.3058		106.1	92.8	98.1	99	6.69552		106	89	78.9	91.3	13.6956
CoaBC	109.7	106.9	98.3	104.967	5.94082		94.1	118.6	93.4	102.033	14.3514		95	99	85	93	7.2111
CoaD	95	74.3	97.1	88.8	12.6012		98.2	108.2	106.2	104.2	5.2915		65.7	103.1	152.1	106.967	43.3296
CoaE	115.1	74.3	54.2	81.2	31.0308		136.8	115.7	116.3	122.933	12.0126		120.1	82.9	84.7	95.9	20.9771
CobB	89	115.3	84.1	96.1333	16.7787		123.8	138.2	90.8	117.6	24.3006		76	72.3	110.4	86.2333	21.0106
CobT	104.2	71.8	98.5	91.5	17.2971		104.1	100.6	101.7	102.133	1.78979		97.9	92.1	129.1	106.367	19.9001
CohE	132.2	86.9	79.4	99.5	28.5662		111.9	57.3	95.1	88.1	27.965		109.4	138	89.9	112.433	24.193
ComR	69.3	90.8	67.4	75.8333	12.9963		93.2	85.3	85	87.8333	4.65009		119.8	153.2	136	136.333	16.7025
CopA	144.3	116.2	135	131.833	14.3151		115.8	111	124.6	117.133	6.89734		37.3	69.9	45.9	51.0333	16.8954
CorA	100.9	116.7	130.3	115.967	14.7137		121.7	93.4	106.2	107.1	14.1715		64.3	85	81.4	76.9	11.0594
CorC	110.2	73.4	111.4	98.3333	21.6012		90	97.1	104.5	97.2	7.25052		124.9	120.1	68.3	104.433	31.3843
CpdA	106.4	85.6	107.7	99.9	12.4012		109.4	128.2	90.1	109.233	19.0505		93	72.1	107.5	90.8667	17.7962
CpdB	99.5	105.7	105	103.4	3.39559		102.5	108.9	98	103.133	5.47753		75.5	86.8	118.1	93.4667	22.0686
CpoB	95.2	81.2	100.5	92.3	9.97146		86.3	91.9	103.2	93.8	8.60872		108.7	111.8	121.2	113.9	6.50922
CpxA	181	105.9	606	297.633	269.68		1.8	2.8	2.5	2.36667	0.51316		0	0	0	0	0
CpxP	80.9	41.4	108.1	76.8	33.5385		216.8	230.1	207.1	218	11.5469		0	0	15.5	5.16667	8.94893
CpxR	158.4	115	158.2	143.867	24.9995		163.9	156.5	145.7	155.367	9.15278		0	0	2.4	0.8	1.38564
Cra	87.4	87.3	138.9	104.533	29.7624		124.9	81.7	107.8	104.8	21.7557		88.3	98.6	85.1	90.6667	7.05431
CreA	78.3	90.1	88.9	85.7667	6.4941		82	79.7	98	86.5667	9.96812		111.4	121.9	149.6	127.633	19.7348
CrfC	132.4	16.4	91.5	80.1	58.8343		133.8	17.9	122.1	91.2667	63.8061		126	115	144.9	128.633	15.1229
Crl	57.1	64.8	56.2	59.3667	4.72687		85.4	90	123	99.4667	20.5098		164.2	149.6	109.7	141.167	28.2118
Crp	113.2	109.1	120.8	114.367	5.93661		104.9	104.1	107.1	105.367	1.55349		68.3	81	91.6	80.3	11.6658
Crr	78.5	63.5	91.1	77.7	13.8174		107.2	103.5	73.2	94.6333	18.6538		110.3	139.6	133.1	127.667	15.3871
CsdA	140.5	115.5	108.5	121.5	16.8226		60.7	115.1	82.6	86.1333	27.3716		65.7	65.3	146.2	92.4	46.5926
CsdE	143.8	88	85.3	105.7	33.0232		80.8	78	116	91.6	21.1773		107.2	68.8	132	102.667	31.8429
CsiE	167.6	115.2	159.2	147.333	28.1434		86.1	72.3	106.1	88.1667	16.9945		62.1	54.7	76.7	64.5	11.1946
CspA	158.8	127.7	165.5	150.667	20.1699		113.4	118.7	94.3	108.8	12.8339		41	46.8	33.8	40.5333	6.51255
CspB	146.2	140	127	137.733	9.79864		69.5	137.2	95.4	100.7	34.1598		50.1	61.8	72.6	61.5	11.253
CspC	59.4	123.9	111.3	98.2	34.1873		103.1	111.4	107.9	107.467	4.16693		112.8	117.1	53.1	94.3333	35.7738
CspD	59.2	93.8	125.8	92.9333	33.3085		83.2	68.7	125.6	92.5	29.5681		79.4	111.9	152.4	114.567	36.573
CspE	94.9	158.7	101.7	118.433	35.0373		88.5	98.1	75.4	87.3333	11.3949		94.6	103.8	84.3	94.2333	9.75517
CspG	287.5	140.4	159.8	195.9	79.9188		61.7	85.8	81.2	76.2333	12.7947		15.8	18.1	49.6	27.8333	18.8855
CsqR	94.5	114.5	115.4	108.133	11.8154		98	74.3	100.9	91.0667	14.5926		86.6	74.8	141	100.8	35.3106
CsrA	126.8	110.5	111.6	116.3	9.10988		73	67.8	113.2	84.6667	24.847		106.1	91.6	99.4	99.0333	7.25695
CsrD	0	0	0	0	0		0	0	0	0	0		0	0	0	0	0
CstA	44	41	48.3	44.4333	3.66924		105	129.2	139.7	124.633	17.795		140.6	139.7	112.5	130.933	15.9701
CueO	100.3	73.3	92.1	88.5667	13.8424		70.7	117.6	84.8	91.0333	24.0633		142.6	130.7	88	120.433	28.7114
CueR	149.2	172.3	80.1	133.867	47.9744		0	71.2	0	23.7333	41.1073		202.1	0	225.1	142.4	123.857
CurA	131.7	111.5	109.8	117.667	12.1829		74	100.2	81.4	85.2	13.507		111.3	99.8	80.3	97.1333	15.6711
CusA	0	0	0	0	0		312.3	455.5	132.2	300	162.001		0	0	0	0	0
CusB	0	0	0	0	0		403.9	240.5	255.6	300	90.2962		0	0	0	0	0
CusC	0	0	0	0	0		272.9	396.3	230.8	300	86.0138		0	0	0	0	0
CutC	122.3	94.8	91.8	102.967	16.8102		144.1	75	89.2	102.767	36.4931		92.7	110.6	79.4	94.2333	15.6564
CvrA	81.8	153.2	100.3	111.767	37.0554		88.5	89.5	65.2	81.0667	13.75		124.9	87	109.6	107.167	19.0668
CyaA	102.7	125	52.7	93.4667	37.0238		114.3	120.8	103.3	112.8	8.8459		101.5	87.3	92.2	93.6667	7.21272
CyaY	81.3	97.6	108.1	95.6667	13.5042		92.4	101.4	67	86.9333	17.8397		119.4	129.5	103.2	117.367	13.2674
CycA	37.9	49.5	43.5	43.6333	5.80115		94.9	62.9	96.7	84.8333	19.0161		165.1	200.8	148.7	171.533	26.6391
CydA	160.8	155.2	201	172.333	24.9835		51.8	56.5	65.5	57.9333	6.96156		67.9	75.3	66	69.7333	4.91359
CydB	160.6	164.8	188.8	171.4	15.2145		70.2	64.7	62.3	65.7333	4.0501		55.9	58.1	74.6	62.8667	10.2207
CydC	131.4	130.2	125.7	129.1	3.005		113.4	118	118.7	116.7	2.87924		52.1	51.9	58.5	54.1667	3.75411
CydD	133.4	93.8	122.6	116.6	20.4705		108.1	114	125.7	115.933	8.95786		69.5	50.6	82.3	67.4667	15.9475
CyoA	99	99.7	118.8	105.833	11.2349		138.8	152.2	128.2	139.733	12.0272		61.1	60.1	42.1	54.4333	10.6927
CyoB	116.1	106.3	94.4	105.6	10.8669		171.7	107.8	136.4	138.633	32.0085		51.1	68.3	47.8	55.7333	11.0074
CysB	113.1	103.5	98.6	105.067	7.37586		88.1	99.7	82.9	90.2333	8.60078		103.1	105.8	105	104.633	1.38684
CysE	49.7	140.3	73.5	87.8333	46.9699		109.5	121	123.8	118.1	7.57826		114.7	104.3	63.3	94.1	27.1757
CysG	95.4	146.2	112.8	118.133	25.8165		110	112.7	85.3	102.667	15.1004		70.2	68.1	99.1	79.1333	17.3235
CysH	115.2	103.3	64.9	94.4667	26.2877		53.7	123.3	51.9	76.3	40.7131		104.2	90.6	192.9	129.233	55.5547
CysI	122.7	84.1	85	97.2667	22.0305		20.4	26	36.7	27.7	8.28191		148.8	15.9	360.3	175	173.688
CysJ	131.4	154	59.6	115	49.2906		7.6	10.3	33.7	17.2	14.353		189.3	67.4	246.6	167.767	91.5201
CysK	76.2	77.9	69	74.3667	4.72476		74.3	68.2	83.2	75.2333	7.54343		131.4	93	226.7	150.367	68.8384
CysM	53.9	89.2	81.4	74.8333	18.5436		80.1	55.5	70.3	68.6333	12.3844		137.6	142.6	189.3	156.5	28.5154
CysN	4.6	257.9	0	87.5	147.589		284.6	4.9	9.8	99.7667	160.089		201.8	0	136.4	112.733	102.961
CysP	137.6	106.7	79.3	107.867	29.1675		38.1	16.5	20.4	25	11.5113		282.3	48.6	170.5	167.133	116.886
CysQ	115.5	108.4	100	107.967	7.75908		93.1	93.1	95.1	93.7667	1.1547		112.5	96.4	86	98.3	13.3518
CysS	120	95.4	121.2	112.2	14.5616		105.4	104.2	96	101.867	5.11599		87.2	85.6	85	85.9333	1.13725
CysZ	183.1	60.7	130.7	124.833	61.4105		76.4	94.1	135.9	102.133	30.5526		77.6	69.8	71.8	73.0667	4.05134
CytR	102.5	124	104.6	110.367	11.8534		86	97.9	99.8	94.5667	7.47953		97.3	90.9	96.9	95.0333	3.58515
DacA	102.8	128.5	108.3	113.2	13.5326		96.8	90.4	87.7	91.6333	4.67369		85.1	106.1	94.2	95.1333	10.5311
DacB	115	90.1	93.8	99.6333	13.4359		98.7	92.7	80.8	90.7333	9.11062		101.9	90.2	136.7	109.6	24.1874
DacC	83	94.8	102.3	93.3667	9.72951		79.2	91.5	79	83.2333	7.15984		112.2	125.1	132.9	123.4	10.4542
DadA	39.1	56.3	46.3	47.2333	8.6379		100	112.4	108.2	106.867	6.30661		134.5	144.5	158.8	145.933	12.2132
DadX	44.5	50.9	46.9	47.4333	3.23316		113.2	108.2	91.5	104.3	11.3635		142.2	136.1	166.5	148.267	16.0824
DamX	107.3	100.4	105	104.233	3.51331		102	103.3	96.3	100.533	3.72335		99.5	108.4	77.8	95.2333	15.7399
DapA	95.5	131.1	107.3	111.3	18.1339		87.1	102	103.7	97.6	9.13291		87.5	86.1	99.7	91.1	7.48064
DapB	92.4	134	97.8	108.067	22.6206		78.3	81.9	90	83.4	5.9925		88	116.8	120.9	108.567	17.9288
DapD	99.2	98.1	96	97.7667	1.62583		98.7	103.3	112.2	104.733	6.86319		91.4	102.3	98.7	97.4667	5.55368
DapE	104.9	108.3	88.5	100.567	10.5874		94.5	80.6	67.6	80.9	13.4525		99.4	93.9	162.4	118.567	38.0603
DapF	157.8	92.5	145.2	131.833	34.6414		88.6	143	66.7	99.4333	39.2867		72.3	86.7	47.1	68.7	20.044
DauA	121.2	104.1	121.5	115.6	9.96042		104.6	79.9	114.5	99.6667	17.8197		60.9	76.4	116.9	84.7333	28.9151
DbpA	135.1	110.9	129.7	125.233	12.7033		135.1	107.2	86.5	109.6	24.3887		53.1	77.6	64.9	65.2	12.2528
Dcd	74.1	108.9	112	98.3333	21.0438		95.2	68.6	110.1	91.3	21.0231		49.9	124	157.2	110.367	54.9338
Dcm	118.5	86.7	73	92.7333	23.3423		133.9	83	109.4	108.767	25.4559		90.2	104.5	100.8	98.5	7.42226
Dcp	74.4	97.5	87.5	86.4667	11.5846		93.2	131.7	113.9	112.933	19.2682		91.5	87.2	123.2	100.633	19.6612
DcrB	119.9	110.1	124.7	118.233	7.44133		96.3	93.3	104.7	98.1	5.90931		85.1	92.3	73.6	83.6667	9.43204
DctA	120.5	175.5	175.9	157.3	31.8704		55.1	71.5	80.9	69.1667	13.0573		71.2	77.1	72.4	73.5667	3.11823
DcyD	51	43.2	78.5	57.5667	18.5436		107	121.1	92	106.7	14.5523		108.9	155.8	142.6	135.767	24.1852
DdlA	104.9	125	98.2	109.367	13.9472		92.2	103.2	92.8	96.0667	6.18493		81.7	97.3	104.6	94.5333	11.698
DdlB	95.7	141.8	110.4	115.967	23.5487		96.7	110.9	90.3	99.3	10.5432		75	81.8	97.3	84.7	11.4293
DdpA	32.4	87.2	87.9	69.1667	31.8428		0	7.9	28.7	12.2	14.8253		228.6	198.8	228.5	218.633	17.1762
DdpD	0	0	0	0	0		0	0	0	0	0		0	0	0	0	0
DeaD	152.8	102.9	125.7	127.133	24.9809		92.2	99.1	92	94.4333	4.04269		73.5	87.3	74.6	78.4667	7.66964
DedA	106.5	106.8	137.7	117	17.9274		125.8	24.8	100	83.5333	52.4749		85.2	81.9	131.1	99.4	27.5025
DedD	112.5	87.3	103.8	101.2	12.7996		90.2	86.4	142.4	106.333	31.2924		84.2	91.1	102	92.4333	8.97459
Def	89.1	161.5	104.8	118.467	38.0857		96	98.9	73	89.3	14.1905		67.9	101.8	106.9	92.2	21.1983
DegP	114	147.2	133.5	131.567	16.6842		72.8	88.5	97.9	86.4	12.6811		77.4	72.9	95.8	82.0333	12.1327
DegQ	81.9	83.8	79.3	81.6667	2.25906		99.2	110.9	107.3	105.8	5.9925		117.6	110.6	109.2	112.467	4.50037
DegS	107.1	61.3	92.3	86.9	23.3726		133.4	94.4	102.4	110.067	20.5994		99.2	120.7	89.3	103.067	16.0531
DeoA	108.6	151.8	123.3	127.9	21.9643		121.8	110.8	112.1	114.9	6.01082		57.7	53	60.9	57.2	3.97366
DeoB	116.1	107.9	120.4	114.8	6.35059		110.6	116	100.1	108.9	8.08517		78.2	82.7	68	76.3	7.53193
DeoC	119	102.8	124.4	115.4	11.241		114.2	115.8	120.2	116.733	3.10698		82.3	70.5	50.8	67.8667	15.9142
DeoD	96.3	112.8	116	108.367	10.5718		103.3	105.8	105	104.7	1.27671		92.8	90.2	77.8	86.9333	8.01582
Der	108.8	107.1	109.2	108.367	1.11505		98.4	76.5	96.4	90.4333	12.108		89	103.4	111.1	101.167	11.218
DgcJ	149.8	163.6	91.9	135.1	38.0433		105.5	59.9	92.9	86.1	23.5482		75.1	84.6	76.7	78.8	5.08626
DgcM	11.3	16	21.1	16.1333	4.90136		61.3	63.1	63.3	62.5667	1.10151		282.1	224.9	156.8	221.267	62.729
DgcP	97.5	65.6	114	92.3667	24.6049		119.8	166.1	121.1	135.667	26.3641		46.5	95.3	74.1	71.9667	24.4698
DgkA	123.1	191.3	73.1	129.167	59.3331		145.3	52.3	167.9	121.833	61.2687		0	0	146.9	48.9667	84.8128
DgoR	125.4	133.2	106.2	121.6	13.8953		101.3	86.6	98.3	95.4	7.76724		66	91.1	92	83.0333	14.7582
Dgt	82.6	79.4	133.3	98.4333	30.2378		92.2	80.7	157.6	110.167	41.479		98.7	88.9	86.7	91.4333	6.38853
DhaK	98.4	121.9	124.8	115.033	14.4777		103.4	112.2	68.1	94.5667	23.3393		104.7	107.9	58.7	90.4333	27.5284
DhaL	101.8	115.4	135.2	117.467	16.7956		83.6	108.6	95.2	95.8	12.5108		110.3	99.9	50	86.7333	32.2342
DhaM	104.7	111.7	112.8	109.733	4.39356		98.7	99.5	77.6	91.9333	12.4195		109.1	115.3	70.6	98.3333	24.217
DiaA	87.4	142.4	86.7	105.5	31.9583		114.9	91.4	76.6	94.3	19.314		94.1	83.4	123.2	100.233	20.5967
DicA	76.9	122.8	135.1	111.6	30.6739		77.9	90.9	93.7	87.5	8.4309		107.1	91.7	103.8	100.867	8.10823
DigH	120.4	69.8	127.2	105.8	31.3618		104.9	137.8	96.9	113.2	21.6765		108.7	134.4	0	81.0333	71.3437
DinI	76.1	111.1	98	95.0667	17.6834		113	112.3	77.7	101	20.1814		131.3	114.5	66	103.933	33.9082
DinJ	82.8	77.3	114.9	91.6667	20.3077		74.6	152.2	120.8	115.867	39.0345		110.1	99.6	67.9	92.5333	21.9696
DjlA	121	149.4	106.6	125.667	21.7783		86.9	86.3	107.7	93.6333	12.1858		76	95.4	70.7	80.7	13.0035
DjlB	100.8	78.9	5.2	61.6333	50.0844		51.3	52.3	72.3	58.6333	11.8462		188.2	124.3	226.7	179.733	51.7224
DkgA	163.5	103.2	158.4	141.7	33.4393		103.8	106.5	80.5	96.9333	14.2956		70.4	52.2	61.4	61.3333	9.10018
DkgB	101.8	86.3	68.5	85.5333	16.6632		105.3	65.9	151.7	107.633	42.9476		114.9	112	93.5	106.8	11.609
DksA	116.7	96.3	118.1	110.367	12.2022		113.1	109.5	102.8	108.467	5.22717		85.3	85.8	72.3	81.1333	7.65398
Dld	69.4	75.1	87.4	77.3	9.19946		103.4	103.1	100.2	102.233	1.7673		132.5	98	130.9	120.467	19.4731
DmsD	69.7	177.5	136.2	127.8	54.3887		111.5	87.1	40.8	79.8	35.9109		91.7	77.1	108.3	92.3667	15.6107
DnaA	125.1	75	113	104.367	26.142		100.5	102.1	89.8	97.4667	6.68755		101	110.4	83.1	98.1667	13.8688
DnaB	108.9	139.7	86.7	111.767	26.616		106.1	105	100.5	103.867	2.96704		79.7	86.1	87.3	84.3667	4.08575
DnaC	71.1	84.8	52.1	69.3333	16.4214		132.5	160.1	145	145.867	13.8204		58.2	135.6	60.5	84.7667	44.038
DnaE	94.4	115.5	154.8	121.567	30.6536		68.9	52.8	67.9	63.2	9.02053		102.7	149.9	93.1	115.233	30.4035
DnaG	105.7	102.9	93.7	100.767	6.278		105.3	93.5	85	94.6	10.1946		98.8	96.7	118.3	104.6	11.9109
DnaJ	99.1	89.7	93.9	94.2333	4.70886		100.5	97.4	108.3	102.067	5.61635		97.7	105.2	108.1	103.667	5.36687
DnaK	97.8	100.5	89.6	95.9667	5.67656		104.1	92.8	98.2	98.3667	5.65184		105.4	99.6	111.9	105.633	6.15332
DnaN	103.2	97.4	122.4	107.667	13.0849		110.3	98.9	81	96.7333	14.7697		79.8	114.6	92.3	95.5667	17.6285
DnaQ	78.1	63.3	114.8	85.4	26.5147		123.4	129.5	101.3	118.067	14.8372		78.8	113.4	97.5	96.5667	17.3189
DnaT	122.9	104.3	107.5	111.567	9.94451		74.6	99.7	98.6	90.9667	14.1846		108.2	108.8	75.5	97.5	19.0549
DnaX	108	95	109.6	104.2	8.0075		97.9	93	101.7	97.5333	4.36157		110.2	83.7	100.9	98.2667	13.4448
DpiA	0	0	0	0	0		0	0	0	0	0		0	0	0	0	0
DppA	36.3	32.5	36.5	35.1	2.25389		96.2	95.9	93.4	95.1667	1.53731		194.1	176.1	139	169.733	28.0963
DppB	18	9.6	11.2	12.9333	4.46019		84	88.9	88.9	87.2667	2.82902		246.4	196.3	156.6	199.767	45.0003
DppC	7.4	8.3	8.7	8.13333	0.665833		109.1	133.1	82.1	108.1	25.5147		243.2	175	133.1	183.767	55.5711
DppD	21.9	12	17	16.9667	4.95008		107.6	84	78.9	90.1667	15.3115		216.6	221.5	140.6	192.9	45.3593
DppF	18.8	29.7	20.6	23.0333	5.84323		87.3	75.8	110.6	91.2333	17.7303		175.8	215.1	166.2	185.7	25.9097
Dps	135.7	178.9	171.3	161.967	23.0628		83.6	83.9	75.9	81.1333	4.53468		49.2	53.5	68.2	56.9667	9.9631
DsbA	89.5	163	76.6	109.7	46.6076		95.6	92.4	115.5	101.167	12.5157		54.8	65.6	147	89.1333	50.4041
DsbB	138.3	0	147.3	95.2	82.5683		79.7	119.2	43.2	80.7	38.0099		163.5	155.1	53.7	124.1	61.1127
DsbC	122.3	72.6	116.7	103.867	27.2221		106.9	103.3	92.4	100.867	7.55006		82.4	105.8	97.6	95.2667	11.8732
DsbD	64.3	218.8	50.5	111.2	93.4394		94.5	140	74.2	102.9	33.6947		8.2	79.6	169.7	85.8333	80.9302
DsbE	106	0	134	80	70.6824		116.2	0	127.1	81.1	70.4458		204.8	0	212.1	138.967	120.404
DsbG	91.8	93.2	91.8	92.2667	0.80829		93.3	77.4	99.3	90	11.3168		132.9	106.5	113.9	117.767	13.6181
DsdA	150.8	148.1	141.1	146.667	5.00633		123	120.8	108.4	117.4	7.87147		32.7	43.2	31.9	35.9333	6.30582
DsdX	145.4	129.7	150.4	141.833	10.8011		121.8	105.8	151.7	126.433	23.2981		30	38	27.3	31.7667	5.56447
Dtd	95.6	66.7	112.6	91.6333	23.2057		88.6	89	98.3	91.9667	5.48847		141.1	98.5	109.6	116.4	22.0991
DtpA	254.5	265	221.2	246.9	22.8677		40.9	54.2	49	48.0333	6.70249		4	5.8	5.3	5.03333	0.929157
DusA	124.8	111.7	117.6	118.033	6.56074		102	92	101.5	98.5	5.63471		82.9	73.6	93.9	83.4667	10.1619
DusB	36.8	23.6	212.6	91	105.515		231.6	25.1	22.1	92.9333	120.098		151.2	18.8	178.2	116.067	85.3103
DusC	126.7	152.8	113.6	131.033	19.956		32.7	126.8	77.8	79.1	47.0635		96.5	93.7	79.3	89.8333	9.22894
Dut	113.9	115.3	106.2	111.8	4.9		89.5	96.7	92.4	92.8667	3.62261		98.4	88.3	99.4	95.3667	6.1403
Dxr	103	95.4	119.1	105.833	12.1014		103.9	122.2	74.2	100.1	24.2246		98.3	103.2	80.8	94.1	11.7758
Dxs	84.9	118.8	99	100.9	17.0297		97.6	116.7	107.8	107.367	9.55737		86	86.8	102.3	91.7	9.18858
EbgA	100	136.1	110.3	115.467	18.5963		133.6	80.5	104.8	106.3	26.5818		84.1	71	79.6	78.2333	6.65607
EbgR	97	169	41.8	102.6	63.7846		92.3	85.6	37.3	71.7333	30.0077		58.2	70.1	248.7	125.667	106.716
EcnB	89.2	93.1	95.7	92.6667	3.27159		85.7	87.7	70.4	81.2667	9.46379		126.7	142.7	108.8	126.067	16.9589
Eco	156.4	163.7	162.6	160.9	3.93573		66.6	76.9	94.2	79.2333	13.9472		48.8	47.5	83.2	59.8333	20.2466
Eda	115.9	77.8	97.8	97.1667	19.0579		95.9	80.9	92.7	89.8333	7.90021		137.8	103.9	97.4	113.033	21.6934
Edd	68.3	83	67.7	73	8.66545		105.1	124.7	101.4	110.4	12.5216		123.8	134.3	91.5	116.533	22.3061
EfeO	85.5	84.1	68.4	79.3333	9.49438		66.4	75.2	74.5	72.0333	4.89115		125.1	101.1	219.8	148.667	62.7612
Efp	118.4	106.3	123.7	116.133	8.91871		109	77.8	118.5	101.767	21.2923		83.3	90.4	72.6	82.1	8.96047
ElaA	79.2	82.7	68.2	76.7	7.56637		96.1	93.7	79.8	89.8667	8.80019		122	96.7	181.6	133.433	43.5895
ElaB	85.7	70.4	116.7	90.9333	23.5895		67.4	48.9	72.7	63	12.4952		115.5	159.5	163.2	146.067	26.5361
ElbB	111	159.9	82.8	117.9	39.0104		22.4	19.6	29	23.6667	4.82632		61.8	109.6	304.1	158.5	128.338
ElyC	125.3	101.3	117.3	114.633	12.2202		77.9	72.7	140.9	97.1667	37.9633		92.4	101	71.2	88.2	15.3375
EmrA	122.6	119	114.7	118.767	3.95517		59.9	60.7	58.2	59.6	1.27671		154.9	106.6	103.5	121.667	28.8226
EmrD	163.2	236.5	167.7	189.133	41.0824		82.8	41.1	40.3	54.7333	24.3097		70.2	47.5	50.8	56.1667	12.2647
EmtA	135.1	225.9	91.2	150.733	68.6973		78.8	75.7	80.7	78.4	2.52389		90.6	20.1	101.9	70.8667	44.3268
EngB	95.9	127.4	101.4	108.233	16.8251		106.6	123.7	100.1	110.133	12.1903		77.3	86.8	80.6	81.5667	4.82321
Eno	80.2	72.1	82	78.1	5.27352		100.7	106.9	90.9	99.5	8.06722		136.2	110.7	120.3	122.4	12.8791
EntA	85.9	28.3	87.2	67.1333	33.6369		126.9	99.2	107.2	111.1	14.2559		39.2	53.2	273	121.8	131.13
EntB	76	74.9	82.4	77.7667	4.0501		159.9	120.3	107.6	129.267	27.2786		59.1	55.7	164.2	93	61.6844
EntC	101.1	59.9	81	80.6667	20.602		99.9	104.9	116.8	107.2	8.68159		79	58.8	198.6	112.133	75.5604
EntE	93.8	88.6	35.8	72.7333	32.0907		146.4	108.9	115.6	123.633	19.9991		29.8	67.5	213.6	103.633	97.0815
EntF	121.7	51.4	72.2	81.7667	36.1132		170.4	173.9	104.2	149.5	39.27		39.7	13.8	152.6	68.7	73.8045
EntH	71.6	91.9	60.5	74.6667	15.923		163.3	93.8	91.2	116.1	40.8971		61.7	60.3	205.6	109.2	83.4878
EnvC	109.5	70.4	108.9	96.2667	22.4032		108.3	119	92.7	106.667	13.2259		107.5	110	73.8	97.1	20.2171
EnvZ	336.1	189.8	374.1	300	97.3089		0	0	0	0	0		0	0	0	0	0
Epd	71	124.3	87.3	94.2	27.3117		103.9	105.3	99	102.733	3.30807		99.3	98.5	111.4	103.067	7.22795
EpmA	117.6	134.1	126	125.9	8.25045		81.5	111.8	101.1	98.1333	15.3663		73.5	78.5	76	76	2.5
EpmB	98.4	104.4	99.2	100.667	3.25781		108	134.5	120.3	120.933	13.2613		89.7	85.7	59.8	78.4	16.2318
EpmC	65.2	100.8	94.7	86.9	19.0386		101.4	104.2	86	97.2	9.8		108.5	115.6	123.6	115.9	7.55447
EptB	30.4	27.9	50.5	36.2667	12.3896		288.3	209.1	218.5	238.633	43.2686		27.8	26.7	20.8	25.1	3.76431
EptC	102.3	76.3	110.6	96.4	17.895		89.1	91.5	96	92.2	3.50286		124	114.6	95.5	111.367	14.5225
Era	83	132.8	116.3	110.7	25.3679		91.3	93.1	79.9	88.1	7.15821		89.8	96.5	117.3	101.2	14.3398
ErfK	99.8	93.1	156.3	116.4	34.7164		91.4	94.4	64.4	83.4	16.5227		91.6	107.1	101.8	100.167	7.87803
ErpA	97.1	126.8	114.2	112.7	14.9067		98.8	67.5	78	81.4333	15.93		127.2	112.1	78.2	105.833	25.0939
EttA	99.4	107	96.8	101.067	5.30031		95.5	94.9	88.3	92.9	3.995		118.2	102.3	97.6	106.033	10.7955
EutA	138.3	67.3	91.2	98.9333	36.1262		138.9	122.5	100.3	120.567	19.3725		51.4	82.7	107.4	80.5	28.0647
EutB	110.7	144.4	83.2	112.767	30.6523		98.9	92.3	101.3	97.5	4.66047		87.7	66.2	115.4	89.7667	24.665
EutC	86.3	127.4	133	115.567	25.4999		82.6	97.4	91.7	90.5667	7.46481		52.4	87.8	141.4	93.8667	44.8091
EutL	99	103.3	103.4	101.9	2.51197		75.1	122.8	102.2	100.033	23.9237		26.6	97.9	169.5	98	71.4501
EvgA	194.3	122	219.2	178.5	50.4895		135.8	71.5	157.1	121.467	44.5637		0	0	0	0	0
ExbB	113.2	75.1	95.9	94.7333	19.0768		115.6	123.4	97.6	112.2	13.2318		88.6	74.3	116.3	93.0667	21.3533
ExbD	90.8	73.5	80.7	81.6667	8.69042		138.4	142	131.6	137.333	5.28141		78.4	69.4	95.2	81	13.095
ExoX	88	96.8	126.9	103.9	20.3988		74.7	102.5	172	116.4	50.1172		107.4	88	43.5	79.6333	32.7613
ExuR	94.2	86.7	126.8	102.567	21.3191		114.7	121.1	95.7	110.5	13.2106		69.6	96.2	95	86.9333	15.0231
FabA	94.5	91.6	115.5	100.533	13.0424		101.6	102.6	89.8	98	7.11899		109.4	103.2	91.8	101.467	8.92711
FabB	114.6	103.7	114.6	110.967	6.29312		98.1	88.7	95.6	94.1333	4.86861		94.4	100.7	89.6	94.9	5.56687
FabD	82	142.1	105.1	109.733	30.3167		103.6	118.7	90.7	104.333	14.0144		81.5	83.1	93.2	85.9333	6.34376
FabF	109.9	112.6	118.1	113.533	4.17892		94.2	97.3	105.6	99.0333	5.89435		86.2	89.3	86.8	87.4333	1.64418
FabG	112.8	109.5	135.6	119.3	14.2123		99.6	99	80.7	93.1	10.7429		78.8	99.6	84.4	87.6	10.7629
FabH	105.6	127.9	98.2	110.567	15.4604		86.4	100.1	96.1	94.2	7.04486		108.4	97.2	80.1	95.2333	14.2521
FabI	99.9	96.9	106	100.933	4.63717		97	93.8	96	95.6	1.63707		103.3	113.2	93.8	103.433	9.70069
FabR	103.2	119.2	104.6	109	8.86115		128.5	104.1	44.7	92.4333	43.101		151.2	50.6	93.9	98.5667	50.4621
FabY	97.9	91.3	77.2	88.8	10.574		102.2	88	129.4	106.533	21.0374		95.8	102.2	116	104.667	10.3234
FabZ	137.5	79.2	133.3	116.667	32.515		95.3	97.6	69.5	87.4667	15.602		99.5	122.3	65.9	95.9	28.3718
FadA	21.4	33	25.7	26.7	5.8643		48.1	62.7	45.5	52.1	9.27146		180.4	196.3	286.9	221.2	57.4506
FadB	27.3	36.6	28.9	30.9333	4.97226		51.6	49.2	54.8	51.8667	2.80951		206.2	184.4	261.1	217.233	39.5224
FadD	29.5	32.1	33.1	31.5667	1.85831		32.2	28.4	33.9	31.5	2.81603		235	216.1	259.7	236.933	21.8642
FadE	24.1	26	19.1	23.0667	3.56417		44.7	63.9	58.9	55.8333	9.96059		171.3	189	303	221.1	71.4775
FadH	18.7	42.4	26.6	29.2333	12.0674		54	54.2	55	54.4	0.52915		190.7	180.1	278.2	216.333	53.8396
FadI	24.2	51.8	24	33.3333	15.9929		61.3	60.4	60.2	60.6333	0.585947		168.3	181.9	268	206.067	54.0652
FadJ	26	45.1	39.4	36.8333	9.80527		50.2	68.5	77.8	65.5	14.0424		175.2	172.7	245.1	197.667	41.0975
FadL	74.3	274.9	108.8	152.667	107.253		80.2	78.2	64.8	74.4	8.37377		0	61.9	156.8	72.9	78.9766
FadR	105.8	92	109	102.267	9.03401		102.5	113.5	113.5	109.833	6.35085		89.9	96	77.7	87.8667	9.3179
FbaA	90.2	76	86	84.0667	7.29475		98	97.2	97.3	97.5	0.43589		116.6	113	125.6	118.4	6.48999
FbaB	0	67.7	62.2	43.3	37.5996		92.2	54	69.1	71.7667	19.2391		236.7	153.9	164.2	184.933	45.1261
Fbp	108.9	159.5	130.6	133	25.3852		81	91.7	93.4	88.7	6.72235		82.7	81.3	70.8	78.2667	6.5041
FdhD	93.4	97.8	97.5	96.2333	2.45832		87.1	111.5	95.4	98	12.406		112.2	95.2	109.9	105.767	9.22298
FdhE	100.2	93.5	88.5	94.0667	5.87055		100.8	95.9	117.1	104.6	11.0991		97.8	106.3	99.9	101.333	4.42757
FdoG	83.3	93	98.9	91.7333	7.87676		103.9	103.4	94.4	100.567	5.34634		119.9	120.8	82.5	107.733	21.8573
FdoH	89.8	77.8	98.8	88.8	10.5357		115.5	66.9	138.9	107.1	36.7276		114.7	113.3	84.4	104.133	17.1039
FdoI	89.9	23.5	101.5	71.6333	42.0863		121.8	90	109	106.933	16.0004		100.4	150.6	113.4	121.467	26.054
Fdx	121	100.3	120.1	113.8	11.7		72.5	97.9	118.3	96.2333	22.9454		103	104.6	62.3	89.9667	23.9734
FeaR	0	0	156.8	52.2667	90.5285		137.1	152.5	82.1	123.9	37.0097		107.6	111.1	152.7	123.8	25.0892
FecA	55	45.3	70.5	56.9333	12.7108		124.5	114.8	117.7	119	4.97896		136.9	130.8	104.6	124.1	17.1607
FecB	103.1	71.4	107.6	94.0333	19.7298		130.6	99.3	111.8	113.9	15.7553		71.1	115.9	89.2	92.0667	22.5372
FecD	149	95.9	203.8	149.567	53.9522		200.9	0	104.9	101.933	100.483		0	88.2	57.3	48.5	44.7537
FecE	87.6	116.8	111.5	105.3	15.556		96.9	102.5	104.3	101.233	3.85919		109.1	94	77.3	93.4667	15.9067
FeoB	153.5	154.4	127.3	145.067	15.393		102.6	107.9	78.5	96.3333	15.6698		44.7	42.8	88.2	58.5667	25.6808
FeoC	159.7	132.8	117.5	136.667	21.3641		99.9	49.8	146	98.5667	48.1139		55.4	54.4	84.4	64.7333	17.0392
FepB	103.5	80.6	84.7	89.6	12.2111		121.8	85.8	133.1	113.567	24.7015		87	73.5	129.9	96.8	29.4494
FepC	0	141	0	47	81.4064		179.8	0	193	124.267	107.82		0	132.6	253.6	128.733	126.844
FepD	0	0	0	0	0		0	0	0	0	0		0	0	0	0	0
FetA	102.9	131.9	88.9	107.9	21.9317		137.6	90.7	82.3	103.533	29.8001		99.7	75.9	89.9	88.5	11.9616
FetB	139.6	97.8	114.8	117.4	21.0209		80	72.8	128.1	93.6333	30.0653		94.3	97.8	74.8	88.9667	12.3929
Ffh	108.1	121.2	108.3	112.533	7.50622		93.2	99.7	78.1	90.3333	11.0817		90.3	103.3	97.8	97.1333	6.52559
FhlA	75.1	98.6	84.9	86.2	11.8038		81.3	64.1	40.7	62.0333	20.3787		235.7	136.5	83.1	151.767	77.437
FhuA	0	0	0	0	0		0	0	0	0	0		0	0	0	0	0
FhuC	108.7	161.7	87.3	119.233	38.3021		107.7	72.2	81.4	87.1	18.4236		110.9	47.5	122.6	93.6667	40.4072
FhuD	161.3	91.5	37.1	96.6333	62.2589		185.8	111.7	108.9	135.467	43.6124		36.8	81.7	85.1	67.8667	26.9582
Fic	96.3	201.1	121.1	139.5	54.7693		41.9	124.9	79.7	82.1667	41.5549		71	77.6	86.3	78.3	7.67398
FieF	92.2	111.3	108.3	103.933	10.2715		101.4	88.7	102.9	97.6667	7.8015		98.1	94.5	102.5	98.3667	4.00666
FimA	153.3	161.2	133.4	149.3	14.3252		42.5	50.8	52.5	48.6	5.3507		42.1	101.1	163	102.067	60.4558
FimC	188	146.7	188	174.233	23.8446		53.4	51.5	37.6	47.5	8.62612		17.8	90.5	126.5	78.2667	55.3729
Fis	132.5	122.4	131.4	128.767	5.54106		87.6	108	83.8	93.1333	13.0144		83.7	79	71.5	78.0667	6.15332
FklB	99.6	101.6	105.7	102.3	3.10966		111.1	88.1	115.3	104.833	14.6429		89.2	99.6	89.8	92.8667	5.83895
FkpA	132.2	122.1	112.5	122.267	9.85106		105.8	109.2	103.5	106.167	2.86764		72.6	76.6	65.4	71.5333	5.67568
FkpB	148.9	24.8	95.1	89.6	62.2325		150.3	38.2	131.7	106.733	60.0758		143.8	127.1	39.9	103.6	55.7942
FldA	94	104.9	97.8	98.9	5.53263		117.8	108	100.8	108.867	8.53307		79.4	103.9	93.5	92.2667	12.2965
FlgA	78.1	110.9	98.4	95.8	16.5539		78.3	106	119.4	101.233	20.9605		101.7	113.3	94	103	9.71545
FlgB	84.4	160	100.8	115.067	39.768		76.2	101.4	64	80.5333	19.0728		126.9	90.3	96.1	104.433	19.6716
FlgC	85.4	109.9	70.3	88.5333	19.9851		74.2	86.6	101.9	87.5667	13.8753		169.9	104.8	96.8	123.833	40.0949
FlgD	77.9	166.4	70.1	104.8	53.4895		103.5	130.3	95.8	109.867	18.1098		94.4	71	90.6	85.3333	12.5576
FlgE	90.3	122	80.2	97.5	21.8103		82.9	111.7	90.5	95.0333	14.9256		146.7	96.2	79.5	107.467	34.988
FlgF	96.8	117.1	97.8	103.9	11.4425		79.8	83.1	80.6	81.1667	1.72143		159.9	109.4	75.4	114.9	42.5176
FlgG	87.6	61.3	94.2	81.0333	17.4053		84.9	87.7	121.9	98.1667	20.6013		138.7	105.2	118.4	120.767	16.8749
FlgH	87.2	86.6	106.8	93.5333	11.4932		103.1	98.8	115.2	105.7	8.50353		90.1	101.9	110.3	100.767	10.1476
FlgI	87.9	93.9	93.7	91.8333	3.40783		96.7	86.7	137.4	106.933	26.8545		103.8	86.1	113.8	101.233	14.0272
FlgK	89.2	97.9	106.7	97.9333	8.75005		113.2	120.1	127.4	120.233	7.10094		85.8	99.6	60	81.8	20.1007
FlgL	95.8	69.9	87.5	84.4	13.2254		104.9	113.8	107.3	108.667	4.60471		132.4	117.2	71.2	106.933	31.8656
FlgM	79.5	90.2	68.6	79.4333	10.8002		83.7	102	160.9	115.533	40.3401		113.8	102.7	98.5	105	7.90506
FlgN	99.6	102.3	96.3	99.4	3.005		95.2	96.8	106.4	99.4667	6.0575		111	118.9	73.6	101.167	24.198
FlhA	114.7	99.4	100.4	104.833	8.5594		109.6	95	100.5	101.7	7.3736		119.5	88	73.1	93.5333	23.6897
FlhB	145.5	74.4	104.8	108.233	35.6741		97.1	107.9	162.7	122.567	35.1735		133.9	73.8	0	69.2333	67.0667
FlhC	88.2	103.9	139.6	110.567	26.3405		65.2	95.1	104.9	88.4	20.6807		108.8	126	68.2	101	29.6789
FlhD	151.3	115	120.2	128.833	19.6297		85.8	94.8	101.3	93.9667	7.78353		96.9	72.8	61.7	77.1333	17.9956
FlhE	48.3	155.1	117.1	106.833	54.1351		82.6	94.4	113.9	96.9667	15.8071		100.6	106.3	81.7	96.2	12.8767
FliA	92.8	92.7	87.5	91	3.0315		113.6	116.2	104.5	111.433	6.14356		110.5	94.2	88	97.5667	11.6217
FliC	94.2	97.7	71.7	87.8667	14.1097		114.9	113.5	98.6	109	9.03383		114.8	109	85.7	103.167	15.4021
FliD	119	100.2	124.9	114.7	12.8992		108.5	97.1	82.5	96.0333	13.0328		106.3	93.9	67.6	89.2667	19.7617
FliE	83.8	80.3	111.1	91.7333	16.8631		126	73.8	65.7	88.5	32.7275		236.4	61.4	61.6	119.8	100.979
FliF	94.1	82.8	100	92.3	8.74014		99.9	99.2	104.6	101.233	2.93655		111.8	111.1	96.5	106.467	8.63848
FliG	98.6	102.4	97.9	99.6333	2.42143		84.7	97.1	94.4	92.0667	6.52099		127	108.7	89.1	108.267	18.9537
FliH	105.1	110.9	86.4	100.8	12.8035		91.9	103	104.7	99.8667	6.9515		109.5	94.4	94.1	99.3333	8.80587
FliI	89.6	105	88	94.2	9.38723		93.1	121	93.7	102.6	15.9377		119.7	97.1	92.8	103.2	14.4503
FliJ	183	214.3	85.4	160.9	67.2318		87.8	109.3	61.3	86.1333	24.0434		11.4	108.9	38.6	52.9667	50.3127
FliK	103.7	145.5	93.1	114.1	27.7049		92.9	96.7	92.3	93.9667	2.38607		106.9	98.8	70.2	91.9667	19.2806
FliL	90.7	94.7	97.8	94.4	3.55949		88.5	95.4	126.2	103.367	20.073		108.7	110.3	87.6	102.2	12.6693
FliM	92.8	135	94.1	107.3	23.9977		103.6	86.1	96.4	95.3667	8.79564		99.2	97.9	94.7	97.2667	2.31589
FliN	85.7	99.6	98.2	94.5	7.6531		114.2	104.7	116.7	111.867	6.33114		81.3	91.5	108.1	93.6333	13.5268
FliO	121.5	103.2	74	99.5667	23.9575		104.7	95.7	116.4	105.6	10.3793		129	97.8	57.7	94.8333	35.7425
FliS	117.9	104	109.6	110.5	6.99357		87.6	109.9	119.3	105.6	16.2816		90.6	100.2	60.9	83.9	20.4888
FliT	119.1	99.6	120.4	113.033	11.6518		112.9	116.8	99.1	109.6	9.3		150.8	68.4	12.8	77.3333	69.4324
FliZ	99.8	78.3	83.6	87.2333	11.201		106.1	79.8	113.2	99.7	17.5957		125.3	112.8	101.1	113.067	12.1022
Flk	118.2	181.4	151.6	150.4	31.6171		90.8	80.9	122.8	98.1667	21.8998		73.5	69.6	11.1	51.4	34.9553
Flu	40.9	63.1	87.6	63.8667	23.3594		53.3	63.4	54.6	57.1	5.49454		214.7	219.6	102.6	178.967	66.1808
FlxA	149.4	69.1	169.6	129.367	53.1607		42.8	66.9	126.1	78.6	42.8648		131.4	117.4	27.3	92.0333	56.496
Fmt	109.9	138.9	101.6	116.8	19.5839		97.2	100.5	87.6	95.1	6.70149		86.5	99.7	78.2	88.1333	10.8427
FocA	141.6	94	175.2	136.933	40.8007		63.2	74.7	70.5	69.4667	5.81922		123.4	92.6	64.9	93.6333	29.2637
FolA	101.3	151.2	129.5	127.333	25.0205		99.3	71.1	104.1	91.5	17.8292		75.3	93.5	74.6	81.1333	10.7156
FolC	122.3	67	112.1	100.467	29.4283		71.9	107.8	103.2	94.3	19.5348		79.9	109.2	126.7	105.267	23.6466
FolD	125.6	82.9	104.3	104.267	21.35		120.6	101.2	103.4	108.4	10.6226		71.6	95	95.3	87.3	13.5974
FolE	38.4	159.2	60.2	85.9333	64.3802		97.9	102.9	83.4	94.7333	10.1283		93.5	112.8	151.7	119.333	29.645
FolK	61.6	68.3	118.4	82.7667	31.0407		93.4	114.8	106.5	104.9	10.7893		129.6	120.5	86.9	112.333	22.491
FolM	160.6	140.4	135.9	145.633	13.1554		68	34.2	183.5	95.2333	78.2871		14.6	144.6	18.2	59.1333	74.0382
FolP	101.5	83.1	105.1	96.5667	11.8006		92.4	110.8	95.1	99.4333	9.93596		94.1	116.6	101.3	104	11.4904
FolX	106.2	77.9	92.6	92.2333	14.1536		104.5	86.8	71.6	87.6333	16.4658		93.7	107.8	158.8	120.1	34.2486
Fpr	99.5	113	110.1	107.533	7.10657		117	107.8	99.6	108.133	8.70479		67.7	95	90.2	84.3	14.575
Frc	89.6	52.1	68.5	70.0667	18.799		98.8	127	84.2	103.333	21.7571		118.5	97	164.3	126.6	34.3734
FrdA	85.6	85.2	99.7	90.1667	8.25853		91.8	89.6	99.1	93.5	4.97293		125.3	117.9	105.9	116.367	9.79047
FrdB	81.2	111.8	101.5	98.1667	15.5699		98.6	82.2	115.3	98.7	16.5502		110.5	99	99.9	103.133	6.39557
Fre	88.8	88.6	89.8	89.0667	0.64291		100.3	90.9	108.2	99.8	8.66083		115	110.7	107.7	111.133	3.66924
FrlB	8.9	39.7	20.5	23.0333	15.5555		20.1	108.1	55.7	61.3	44.2665		156.2	86.8	403.9	215.633	166.695
FrlR	140.5	112.7	126.2	126.467	13.9019		90.1	109.2	93.5	97.6	10.1887		89.3	97.8	40.5	75.8667	30.9219
FrmA	87.2	82.6	101.7	90.5	9.96845		125.6	103.6	113.7	114.3	11.0123		95.4	99.5	90.7	95.2	4.40341
FrmB	91.7	103.8	90.1	95.2	7.49066		130.4	137.7	109.3	125.8	14.7482		63	92.1	82	79.0333	14.7751
FrmR	89	115.7	80.5	95.0667	18.3675		80.3	68.7	96.3	81.7667	13.8583		157.6	102.9	108.9	123.133	29.9994
Frr	105.7	99.4	103.2	102.767	3.17228		106.4	99.5	104.3	103.4	3.53695		78.7	111.7	91	93.8	16.6772
FrsA	118.4	125.1	117.8	120.433	4.05257		114.8	69	106.1	96.6333	24.3233		90.6	78.9	79.3	82.9333	6.64254
FruA	106.5	107	120.2	111.233	7.76938		90.4	56.6	80	75.6667	17.3117		126	119.8	93.5	113.1	17.2549
FruB	107.1	87.9	100.9	98.6333	9.79864		92.7	96.5	76.2	88.4667	10.7918		127.7	136.2	74.9	112.933	33.2109
FruK	96.7	90.9	97.8	95.1333	3.7072		87.4	81.7	77	82.0333	5.20801		137.9	137.9	92.7	122.833	26.0962
FryB	147.4	122.4	160.6	143.467	19.4014		85.9	88.1	111.9	95.3	14.418		0	87.3	96.3	61.2	53.1914
FtnA	80.8	101.2	61.6	81.2	19.803		76.1	119.3	129	108.133	28.1624		95.2	113.5	123.3	110.667	14.2627
FtnB	161	158.1	198.1	172.4	22.304		159.9	223	0	127.633	114.948		0	0	0	0	0
FtsA	110.1	95.5	111.5	105.7	8.86115		96.8	84.4	91.1	90.7667	6.20672		107.5	99.3	103.7	103.5	4.10366
FtsB	107.3	86.2	103.5	99	11.2468		73.9	82.9	189.4	115.4	64.2437		98.6	91.4	66.8	85.6	16.6745
FtsE	106.9	102.7	131.7	113.767	15.6721		96	87.2	110.4	97.8667	11.7121		90.3	86	88.7	88.3333	2.17332
FtsH	96.1	100.7	100.8	99.2	2.68514		92.5	94.5	99.4	95.4667	3.55012		96.7	94.9	124.3	105.3	16.4791
FtsI	106.4	114.2	126.6	115.733	10.1869		106.4	108.1	98.2	104.233	5.29371		84.1	88.4	67.5	80	11.0368
FtsK	117.9	105.5	101	108.133	8.75233		103	110.3	107.3	106.867	3.66924		84.6	87.8	82.7	85.0333	2.57747
FtsL	132.8	39.8	140.8	104.467	56.1456		94.8	105.1	96.8	98.9	5.46168		105.3	84.8	99.7	96.6	10.5958
FtsN	115.8	74.8	117.8	102.8	24.2693		85.5	76.7	160.4	107.533	45.9948		99.3	99.9	69.7	89.6333	17.2654
FtsP	84.7	81.2	89.4	85.1	4.11461		68.4	145.1	95	102.833	38.9454		93.6	111.6	130.9	112.033	18.6538
FtsQ	92.8	111.1	106.1	103.333	9.45851		91.8	105.9	99	98.9	7.05053		103.2	106.5	83.7	97.8	12.3219
FtsW	115.8	156.1	120.3	130.733	22.0831		103.4	114.8	99.2	105.8	8.07217		63.1	65.5	61.8	63.4667	1.87705
FtsX	106.3	125.2	105.3	112.267	11.2117		106.3	91.9	86.4	94.8667	10.2763		102.6	92.2	83.9	92.9	9.36963
FtsY	116.7	94.3	113.7	108.233	12.1595		104.3	100.9	96.7	100.633	3.80701		93.5	96.9	83	91.1333	7.24592
FtsZ	90.9	115.3	88.4	98.2	14.8617		91.7	86.6	108.6	95.6333	11.5154		105.2	113.1	100.3	106.2	6.45833
FucI	81.8	114.9	73.9	90.2	21.7525		100.9	132.9	112.1	115.3	16.2382		62.1	89	132.3	94.4667	35.4178
FucO	0	0	0	0	0		0	0	0	0	0		0	0	0	0	0
FucR	111.2	48.1	104.2	87.8333	34.5876		119.7	29.2	145.1	98	60.921		153.2	27.8	161.4	114.133	74.8792
FumA	45	53.3	51.8	50.0333	4.42305		76.4	86.9	82.3	81.8667	5.2634		170.8	166.7	166.9	168.133	2.31157
FumC	48.7	61.8	48.4	52.9667	7.65136		84.4	82.6	81.4	82.8	1.50997		155.9	165.6	171.2	164.233	7.74102
FumD	100	117.6	92.3	103.3	12.9688		115	103	66.3	94.7667	25.3725		106.8	105.2	93.8	101.933	7.08896
Fur	69.9	145.5	60.3	91.9	46.6665		88	82.3	84.9	85.0667	2.85365		98.7	122.1	148.4	123.067	24.8641
FusA	109.5	109.4	107.5	108.8	1.12694		93.6	97.4	91.6	94.2	2.94618		93.4	98.2	99.3	96.9667	3.13741
FxsA	105	32.8	74.9	70.9	36.2658		91.6	94.8	86.7	91.0333	4.07962		147.1	159.2	107.9	138.067	26.8165
GabD	42.9	31.1	41.7	38.5667	6.4941		47.5	60.9	54.9	54.4333	6.71218		251.7	184.5	184.8	207	38.7116
GabT	56.1	47.5	45	49.5333	5.82266		61.4	69.8	54.6	61.9333	7.61402		196.5	162.9	206.1	188.5	22.6839
GadA	192.6	169.6	192.4	184.867	13.2217		114.4	123.4	105.7	114.5	8.85042		1	0.7	0.3	0.666667	0.351188
GadB	217.3	112.7	239.8	189.933	67.8255		88.5	85.6	156.2	110.1	39.9501		0	0	0	0	0
GadC	213.2	215.5	176.8	201.833	21.71		103.8	102.9	87.7	98.1333	9.04673		0	0	0	0	0
GalE	71.5	90.9	89.3	83.9	10.7685		117.7	116.8	107.9	114.133	5.41695		118.4	116.3	71.3	102	26.6077
GalF	91.4	84.7	105.5	93.8667	10.6171		106.3	105.7	89.9	100.633	9.30018		103.5	83.8	129.1	105.467	22.7139
GalK	50.8	66.1	85.5	67.4667	17.3903		129.6	116.8	94.7	113.7	17.6553		122.8	137.6	96	118.8	21.0865
GalM	75.5	77.9	93.3	82.2333	9.65885		96.6	82.5	94	91.0333	7.50355		151.4	140.3	88.4	126.7	33.6299
GalP	70.8	71.5	112.1	84.8	23.6451		82.2	68.8	117.3	89.4333	25.046		163.7	151.4	62.2	125.767	55.3928
GalR	121.1	68.3	118.9	102.767	29.8693		93.8	95.4	110.2	99.8	9.04212		100	96	96.4	97.4667	2.20303
GalS	0	0	27.8	9.26667	16.0503		306.6	0	51.1	119.233	164.264		68.1	48.4	398	171.5	196.402
GalT	79.4	62.8	107.9	83.3667	22.8102		103.4	101	124.7	109.7	13.0457		133.3	121.1	66.4	106.933	35.629
GalU	107	105.1	96.4	102.833	5.65184		98	109.6	101	102.867	6.02107		95.4	82.2	105.4	94.3333	11.6367
GapA	74	77.6	83.5	78.3667	4.79618		105.3	104.3	121.2	110.267	9.48174		110.2	117.5	106.5	111.4	5.59732
GarR	193.2	148.9	164.8	168.967	22.442		86.4	90.8	92.2	89.8	3.02655		27.4	29.4	66.9	41.2333	22.2505
GatA	66	84.6	72.4	74.3333	9.44951		113.6	129.5	107.9	117	11.1942		110.2	93.9	121.8	108.633	14.0158
GatB	56.4	81	71.3	69.5667	12.3913		81.8	128	112.5	107.433	23.513		106	98.5	164.4	122.967	36.0777
GatC	57.7	89.2	61.8	69.5667	17.1261		111.9	165.1	94.4	123.8	36.8216		72	104.5	143.4	106.633	35.7478
GatD	65.7	114.2	85.3	88.4	24.3982		116.6	123.4	111.2	117.067	6.11337		87.1	95.5	101.1	94.5667	7.04651
GatY	40.6	52.8	122.8	72.0667	44.3578		152.5	172.5	74	133	52.0649		65.7	142.5	76.5	94.9	41.575
GatZ	57.2	103.9	75.4	78.8333	23.5385		105.8	111	105.8	107.533	3.00222		108.6	109.5	122.8	113.633	7.95131
Gcd	70.4	62.7	62.5	65.2	4.50444		37.5	35.4	38.9	37.2667	1.76163		232.8	214.4	145.4	197.533	46.0766
Gcl	207.9	188.1	305.2	233.733	62.6787		0	0	95.2	31.7333	54.9637		0	103.5	0	34.5	59.7558
GcvA	120.1	34.5	62.7	72.4333	43.6222		141.9	113.9	145.6	133.8	17.3329		103.6	83.9	93.7	93.7333	9.85004
GcvH	71.1	51.9	99.3	74.1	23.842		103.6	121.6	72.1	99.1	25.0549		100.3	93.2	186.8	126.767	52.1115
GcvP	70.6	82.2	77.4	76.7333	5.82866		83.4	105.3	92.1	93.6	11.0268		109	104.3	175.6	129.633	39.8776
GcvR	108	2.1	181.7	97.2667	90.2798		67.5	153.2	18.1	79.6	68.358		112.8	176.5	80.1	123.133	49.0237
GcvT	81.6	76.5	100	86.0333	12.3614		88.6	92.1	105.5	95.4	8.9202		103.1	97.8	154.9	118.6	31.5482
GdhA	33.8	38.5	31.2	34.5	3.7		130	109.6	106.4	115.333	12.8021		165.4	159.7	125.4	150.167	21.6371
Ggt	38.6	23.8	42.9	35.1	10.0195		63.5	59.3	78.2	67	9.92421		316.5	188.1	89.2	197.933	113.969
GhrA	78.7	56.9	54.5	63.3667	13.3332		94.5	147.1	84.7	108.767	33.5573		151.9	125.6	106	127.833	23.0314
GhrB	85.5	71.7	113.7	90.3	21.4075		112.6	121.1	96.4	110.033	12.5484		85.5	121.2	92.3	99.6667	18.9558
GhxP	113.4	110.8	96.5	106.9	9.1		65.1	83.2	82.9	77.0667	10.3645		92.3	98.7	157.1	116.033	35.7084
GlaH	13.6	9.7	13.1	12.1333	2.12211		34.3	43.6	44.9	40.9333	5.78129		263.6	213.5	263.6	246.9	28.9252
GlcB	92.4	97.3	87.3	92.3333	5.00033		75.6	66.8	77.8	73.4	5.82065		148.8	114.7	139.3	134.267	17.5984
GlcC	11	18.3	35.9	21.7333	12.8001		48.2	41.6	56	48.6	7.20833		206.9	166.4	315.6	229.633	77.1542
GldA	89.8	86.8	94.6	90.4	3.93446		110.5	112.2	141.5	121.4	17.4279		98.3	77.5	88.7	88.1667	10.4103
Glf	107	86.8	111.7	101.833	13.2296		103.9	100.8	95	99.9	4.51774		93.8	107.2	93.7	98.2333	7.76552
GlgA	65.3	130.8	114.6	103.567	34.1154		94.2	123.1	80.6	99.3	21.7041		97.3	108.9	85.2	97.1333	11.8509
GlgB	112.4	62	92.2	88.8667	25.3648		94.4	90.5	70.3	85.0667	12.9361		163.4	113.6	101.1	126.033	32.9585
GlgC	98.5	121.9	113	111.133	11.8112		92.7	109.1	94.4	98.7333	9.01795		95.4	83.5	91.6	90.1667	6.0781
GlgP	95.5	119.9	105.6	107	12.2601		92.2	78.5	83.8	84.8333	6.90821		121.9	118.2	84.3	108.133	20.723
GlgS	54.8	142.8	149.3	115.633	52.7834		153.6	135.4	96.3	128.433	29.2784		19.9	25.1	122.8	55.9333	57.9666
GlgX	63.7	92.8	61.2	72.5667	17.5671		107.5	113.5	104.2	108.4	4.71487		169	92.9	95.3	119.067	43.2602
Glk	71.9	70	70.7	70.8667	0.960902		102.5	88.1	103.4	98	8.58545		129.3	133.6	130.4	131.1	2.23383
GlmM	106.5	114.3	122.2	114.333	7.85005		102.4	87.2	100	96.5333	8.1715		81.1	86.2	100.1	89.1333	9.83379
GlmS	102	116.6	118.1	112.233	8.89401		77.8	94.5	89.3	87.2	8.54576		92.5	92.8	116.5	100.6	13.7706
GlmU	123.3	93.9	126.2	114.467	17.8702		92.6	83.8	103.4	93.2667	9.81699		93.5	98.8	84.4	92.2333	7.28309
GlnA	102.3	98.3	116.3	105.633	9.45163		84.4	100.7	106.2	97.1	11.3371		92.1	87.7	111.9	97.2333	12.8908
GlnB	107	54.4	136.9	99.4333	41.7673		99.4	86.4	85	90.2667	7.94061		111.6	93.7	125.6	110.3	15.9897
GlnD	95.4	86.3	123.8	101.833	19.5602		116.7	95.5	108.9	107.033	10.7226		88.2	70.2	115	91.1333	22.5436
GlnE	89.6	46.5	60.8	65.6333	21.9528		113	126.2	75.2	104.8	26.4704		123.6	113.8	151.3	129.567	19.449
GlnG	214.3	325.4	317.8	285.833	62.0661		11.1	16.7	14.7	14.1667	2.83784		0	0	0	0	0
GlnH	96.6	119.6	106.8	107.667	11.5245		84.7	109.5	75.8	90	17.464		106.3	82.2	118.4	102.3	18.4285
GlnL	113	26.5	77.8	72.4333	43.499		0	0	0	0	0		180.7	223.2	278.7	227.533	49.1435
GlnP	116.1	139.6	137	130.9	12.8829		78.6	71.1	60	69.9	9.35788		69.6	85.2	142.7	99.1667	38.4994
GlnQ	112.6	130.9	167	136.833	27.6811		63	75.2	74.2	70.8	6.77348		94	93.7	89.5	92.4	2.51595
GlnS	102.5	106.2	110.7	106.467	4.1065		104.9	104.6	97.9	102.467	3.95769		96.6	88.5	88	91.0333	4.82735
GloA	64.9	71.8	97.2	77.9667	17.0101		60.3	84.1	134.5	92.9667	37.8863		142.5	155.9	88.7	129.033	35.5665
GloB	42.9	54	40.4	45.7667	7.23901		105.2	120	79.4	101.533	20.5469		160.1	123.1	175	152.733	26.7227
GloC	194.8	141.3	155.1	163.733	27.7752		127	102.5	85.9	105.133	20.6762		21.7	22.8	49	31.1667	15.4539
GlpA	73.1	92.1	96.7	87.3	12.5108		146.2	119.9	105.5	123.867	20.6379		80.5	95.6	90.5	88.8667	7.68136
GlpB	91.2	83.9	111.9	95.6667	14.5246		128.8	107	104.9	113.567	13.2342		87.2	92	93.1	90.7667	3.13741
GlpC	76.6	78.8	133	96.1333	31.9464		153.8	113.6	124.8	130.733	20.7464		87.2	68.4	63.9	73.1667	12.3597
GlpD	79.3	78.2	110.3	89.2667	18.2237		123.6	106.5	102.9	111	11.0594		113.3	99.5	86.4	99.7333	13.4515
GlpE	93.8	93.3	102.7	96.6	5.28867		116.1	125.7	89.8	110.533	18.5861		108.7	89	80.9	92.8667	14.2977
GlpF	60.7	114.8	131.4	102.3	36.9704		102.3	106.6	91.3	100.067	7.89071		100.7	116.8	75.4	97.6333	20.8697
GlpK	84.3	90.4	92.7	89.1333	4.34089		120.1	105.2	112	112.433	7.45945		105.1	98.7	91.5	98.4333	6.80392
GlpQ	90.2	96.1	120.5	102.267	16.0637		122.1	108.1	99.1	109.767	11.5902		75.8	94.8	93.3	87.9667	10.5633
GlpR	86.8	88.3	106	93.7	10.6785		103.1	99.2	94.3	98.8667	4.40946		117.5	119.7	84.9	107.367	19.4878
GlpT	83.2	118.6	127.5	109.767	23.4338		124.6	101	102.1	109.233	13.3193		63.3	88.8	91	81.0333	15.3969
GlpX	88.4	85.2	93.5	89.0333	4.18609		97.3	90.4	114.4	100.7	12.356		121.8	130.7	78.2	110.233	28.0963
GlsA1	211.3	135.3	193.8	180.133	39.8005		88.9	97.9	88.4	91.7333	5.34634		37.2	22.2	24.9	28.1	7.99562
GlsA2	113	96.8	125	111.6	14.152		93	101.6	105.6	100.067	6.43843		115.5	92.6	57	88.3667	29.4789
GltA	30.2	39.4	36.4	35.3333	4.69184		72.3	78.8	76.5	75.8667	3.29596		168.2	174.4	223.9	188.833	30.5264
GltB	69.9	63.5	77.6	70.3333	7.05998		111.6	96	116.8	108.133	10.8247		112.7	108.9	142.9	121.5	18.6301
GltD	54.4	67	72.2	64.5333	9.15278		113.8	109.6	100	107.8	7.0739		120.6	109.5	153	127.7	22.6024
GltI	64.8	72.2	70.4	69.1333	3.85919		108.2	124.6	119.3	117.367	8.36919		107.9	113.4	119.2	113.5	5.65066
GltJ	25.4	47.3	67.1	46.6	20.8588		93.9	119.4	173.8	129.033	40.8118		168.5	165	39.5	124.333	73.4887
GltK	0	0	50.3	16.7667	29.0407		102.2	118.6	65.8	95.5333	27.0239		142.6	178.2	242.2	187.667	50.4703
GltL	73.7	70.6	75.3	73.2	2.38956		126.8	141.7	119.6	129.367	11.2714		40	156.2	96.1	97.4333	58.1115
GltP	58.2	68.6	55	60.6	7.11056		126.1	148.7	83.3	119.367	33.2159		118	75.4	166.6	120	45.6329
GltX	106.3	90.5	112.1	102.967	11.1791		105.6	76.9	111.1	97.8667	18.3647		98.9	90	108.6	99.1667	9.30287
GluQ	81.8	120.2	143.2	115.067	31.0202		139.8	91.6	81.7	104.367	31.0828		70.5	104.1	67.1	80.5667	20.4512
GlxK	20.4	19	124.5	54.6333	60.5104		26.9	25.1	82.8	44.9333	32.8058		300.8	186.4	114	200.4	94.1837
GlyA	90.4	90.7	108.9	96.6667	10.5954		86	112	114.6	104.2	15.8152		93.5	93.7	110.3	99.1667	9.64227
GlyQ	110.4	83.3	99.7	97.8	13.6495		109.4	114	85.1	102.833	15.5288		106.9	100.3	91	99.4	7.98812
GlyS	104.9	89.9	101.9	98.9	7.93725		100.2	98.5	103.5	100.733	2.54231		100.5	104	96.6	100.367	3.7018
GmhA	96.1	108	109.9	104.667	7.47953		100.4	89.5	102.6	97.5	7.01498		112.3	96.7	84.4	97.8	13.9825
Gmk	140	106.1	122.2	122.767	16.9571		91.4	87.6	96.7	91.9	4.57056		72.1	104.2	79.7	85.3333	16.7751
Gnd	89.3	91.4	95.7	92.1333	3.26241		101	105.4	100.4	102.267	2.73008		103.4	106.3	107.2	105.633	1.98578
GnsA	88.7	108.8	81.5	93	14.1489		64.3	117.1	77.9	86.4333	27.4148		121.8	108.4	131.6	120.6	11.6465
GnsB	99.8	82.1	98.9	93.6	9.96945		95.1	112.2	75.1	94.1333	18.5689		121.4	112.4	103.1	112.3	9.15041
GntK	120	80.2	87.5	95.9	21.188		104.1	74.4	128	102.167	26.8523		97.1	129.1	79.6	101.933	25.1015
GntR	145	105.7	121.2	123.967	19.7955		99.9	102.7	96.6	99.7333	3.05341		89.3	82.1	57.5	76.3	16.6745
GntT	156.3	0	149.4	101.9	88.3154		0	252.9	109	120.633	126.851		232.4	0	0	77.4667	134.176
Gor	105.3	109.3	98.8	104.467	5.29937		86.9	103.9	103.6	98.1333	9.72951		105.1	95	92.1	97.4	6.82422
Gph	101.6	95	105.4	100.667	5.26245		88.8	119.5	97.2	101.833	15.8658		87.9	104.5	100.1	97.5	8.6
GpmA	74	65	81.8	73.6	8.40714		76.5	84.7	116.9	92.7	21.3551		128.9	111.6	160.5	133.667	24.796
GpmB	98.7	81.2	95.9	91.9333	9.40018		96.7	81.8	140.9	106.467	30.7367		118.3	105.4	81.2	101.633	18.8346
GpmI	81.2	70.3	77.2	76.2333	5.51392		114	104.2	97	105.067	8.53307		124.9	125.3	105.9	118.7	11.0869
GppA	135.7	50.7	121.4	102.6	45.5119		134.3	82.5	88.1	101.633	28.4284		100.2	90.7	96.4	95.7667	4.78156
Gpr	64.7	56.6	74.6	65.3	9.01499		101.1	100.5	100.7	100.767	0.305505		84.7	116.5	200.7	133.967	59.9401
GpsA	112.3	130.9	105.8	116.333	13.027		94.2	94.5	86.1	91.6	4.7655		91.8	92.4	92.1	92.1	0.3
Gpt	108.2	81.6	107.9	99.2333	15.2717		120.4	60.7	94.2	91.7667	29.9243		104.9	116	106.1	109	6.0918
GrcA	75.7	76.2	48.8	66.9	15.6771		153.7	80.9	172.7	135.767	48.4563		60.9	87	143.9	97.2667	42.4418
GreA	108.5	122.2	109.5	113.4	7.63741		84.7	92	103.1	93.2667	9.26517		93.5	93.1	93.3	93.3	0.2
GreB	148.1	87.1	128.5	121.233	31.1425		88	63.4	140	97.1333	39.1082		89.4	119.2	36.2	81.6	42.0462
GroL	98.5	83.6	95.8	92.6333	7.93872		102.9	97.2	108.9	103	5.85064		93.9	101.3	118	104.4	12.3454
GroS	97.6	90.6	100.8	96.3333	5.21664		94.5	104.9	93.2	97.5333	6.41275		94.1	95.4	129	106.167	19.7849
GrpE	105.9	100.2	91.3	99.1333	7.35822		86.9	86.5	94.5	89.3	4.50777		106.5	96.7	131.5	111.567	17.9447
GrxA	87.4	159.7	116.1	121.067	36.405		98.7	87.9	83.3	89.9667	7.90527		76.6	97.5	92.8	88.9667	10.9646
GrxB	125.3	111	152.9	129.733	21.2989		104.9	84.2	105.9	98.3333	12.25		74.4	64.8	76.6	71.9333	6.27482
GrxC	96.7	83.1	99.5	93.1	8.77268		113.5	105.2	114.6	111.1	5.13907		110.9	96.2	80.3	95.8	15.3039
GrxD	102.4	94	91.5	95.9667	5.70993		95	132.5	96.9	108.133	21.1235		86.1	111.2	90.3	95.8667	13.4441
GshA	91.6	88.1	99.1	92.9333	5.61991		117.8	100.6	96.9	105.1	11.153		96.6	104.6	104.7	101.967	4.64794
GshB	92.7	107.5	84.8	95	11.5235		112	103.3	95.3	103.533	8.35244		100	84.2	120.2	101.467	18.0448
GsiB	124.6	57	80.5	87.3667	34.3191		100.8	82.9	134.5	106.067	26.2001		113.3	80.8	125.6	106.567	23.1466
Gsk	95.3	115.4	98.7	103.133	10.7584		95.1	88	81.2	88.1	6.95054		104.1	118.5	103.7	108.767	8.43169
GspC	69.9	81.3	41.1	64.1	20.7181		107.3	135.4	115.3	119.333	14.4777		148.4	63.9	137.5	116.6	45.9638
Gss	96.6	73.9	94.5	88.3333	12.5437		93.2	93.3	109.9	98.8	9.61301		136	105.3	97.2	112.833	20.4676
GstA	82.2	199.3	106.5	129.333	61.7991		93.7	101.4	91.9	95.6667	5.04612		62.3	92.8	70	75.0333	15.8607
GstB	85.7	106.2	90.8	94.2333	10.6726		104.1	95.2	96.1	98.4667	4.89932		109.3	108.7	103.8	107.267	3.01717
GuaA	109.1	99	111.5	106.533	6.6335		95.3	99.6	100.6	98.5	2.81603		88.7	91.5	104.6	94.9333	8.48783
GuaB	91.1	109.6	74.1	91.6	17.7553		83.8	105.6	98.7	96.0333	11.142		65.3	98.1	173.8	112.4	55.6456
GuaC	76.7	164.4	98.1	113.067	45.7255		92.8	101.3	79	91.0333	11.2545		84.6	105	98.1	95.9	10.3764
GuaD	109.1	115.1	89.1	104.433	13.6137		83.4	125.4	67.1	91.9667	30.0793		113.9	74.3	122.6	103.6	25.7447
GudD	113.8	142.8	111.8	122.8	17.3494		94.3	94	108.1	98.8	8.05543		80.3	62.7	92.2	78.4	14.8415
GutM	50.9	109	96.7	85.5333	30.6174		153.1	202.2	176.3	177.2	24.5624		14.8	24.9	72.1	37.2667	30.5863
GutQ	87.2	98.4	77.8	87.8	10.3131		112.1	119.7	122.6	118.133	5.42248		92.2	57.4	132.6	94.0667	37.6347
GyrA	97.1	96.3	111	101.467	8.26579		101.2	111.3	88.9	100.467	11.218		87.2	97.8	109.2	98.0667	11.0024
GyrB	104.3	126.1	104.1	111.5	12.6444		101	101.4	93.6	98.6667	4.39242		80.6	97.7	91.2	89.8333	8.63153
HchA	150.4	203.5	149.7	167.867	30.8614		86.4	96	78.1	86.8333	8.95786		46.1	56.6	33.3	45.3333	11.6689
HcxB	46.3	48.8	27	40.7	11.9302		111.8	141.2	79	110.667	31.1155		121.5	167.1	157.3	148.633	24.0036
Hda	145.5	95.4	141.1	127.333	27.7424		97.6	105.6	79.6	94.2667	13.3167		34.6	50.8	149.8	78.4	62.3625
HdeA	214.8	147.3	245.2	202.433	50.1079		79.7	102	97.4	93.0333	11.7738		5	4.7	3.9	4.53333	0.568624
HdeB	227.9	215	181.6	208.167	23.8944		89.9	99.2	83.5	90.8667	7.89451		1.1	0.9	1	1	0.1
HdfR	107.5	106.4	92.4	102.1	8.41843		85.3	111.4	94.3	97	13.2578		99.1	131.8	71.7	100.867	30.0889
HdhA	89.7	86.4	135	103.7	27.1568		90.4	79.4	58.4	76.0667	16.2583		112.3	118.4	130.1	120.267	9.04563
HelD	82.5	71.7	131.1	95.1	31.6411		78.1	69.1	139.2	95.4667	38.1406		127.9	114.9	85.4	109.4	21.7773
HemA	153.9	96.6	87.6	112.7	35.9629		77.7	86.7	114.9	93.1	19.4082		93.3	45.3	144	94.2	49.3562
HemB	86.6	81.2	108.9	92.2333	14.6841		97	98.8	122.9	106.233	14.4618		103.5	108.6	92.4	101.5	8.28312
HemC	82.1	144.8	120.3	115.733	31.5985		95.5	121.6	108.7	108.6	13.0503		70.4	69.1	87.5	75.6667	10.2686
HemD	135.9	100.1	103.1	113.033	19.8598		124.9	83	123.5	110.467	23.7971		76.8	70.9	82	76.5667	5.55368
HemE	104.4	96.3	121.7	107.467	12.9747		99.9	104	96.6	100.167	3.7072		92.3	89.8	94.9	92.3333	2.55016
HemG	106.6	88	114.4	103	13.5632		97.8	92.4	85.5	91.9	6.16523		106.5	110.6	98.2	105.1	6.31744
HemH	94.7	105.6	88	96.1	8.88313		81.6	79.6	100	87.0667	11.2451		146.1	84.5	119.9	116.833	30.9143
HemL	121.8	116.3	130.4	122.833	7.10657		91.9	91.4	92.2	91.8333	0.404145		90.9	82.9	82.1	85.3	4.86621
HemN	126	83.3	106.2	105.167	21.3687		112.3	78.6	124.9	105.267	23.9379		105.2	71.2	92.4	89.6	17.1721
HemW	106.8	69.2	114.2	96.7333	24.1299		82.1	146.8	85.1	104.667	36.5194		88.4	80.4	126.9	98.5667	24.8613
HemX	88.6	89.3	92.5	90.1333	2.07926		94	99.5	104.4	99.3	5.20288		111.7	119.3	100.7	110.567	9.35165
HemY	92.7	104.6	95.3	97.5333	6.25646		79.4	96.1	104.4	93.3	12.733		99.3	106.1	122.1	109.167	11.7053
HexR	67.6	112.3	100.9	93.6	23.2269		94.5	102.2	97.2	97.9667	3.90683		111.1	104.3	110.1	108.5	3.67151
HflC	99.4	94.8	97.7	97.3	2.32594		106.2	97.9	112.8	105.633	7.46615		89	92.4	109.9	97.1	11.2147
HflD	95.5	142.1	87.5	108.367	29.4865		100.9	91.5	86.8	93.0667	7.17937		103.9	83.4	108.5	98.6	13.363
HflK	103.8	89.8	103.6	99.0667	8.02579		101.4	103.8	110.1	105.1	4.49333		102.9	96	88.6	95.8333	7.15146
HflX	100.4	86.7	105.8	97.6333	9.84598		98.7	94.8	119.1	104.2	13.0503		98.7	106.2	89.7	98.2	8.26136
Hha	175.7	89.4	174.8	146.633	49.5676		40.2	33.6	136.3	70.0333	57.4834		95.4	80.7	73.9	83.3333	10.9892
HigA	116.2	80.2	127.7	108.033	24.7807		79.3	124.2	65.4	89.6333	30.7318		78.2	80.4	148.4	102.333	39.9101
HinT	100.8	64.5	79.4	81.5667	18.2467		97.3	126.8	68.8	97.6333	29.0014		113.1	126.8	122.5	120.8	7.00643
HisA	80.8	82.3	102.2	88.4333	11.9459		97.6	110.7	146.9	118.4	25.5361		93.8	110.9	74.8	93.1667	18.0583
HisB	72.8	61.9	85.2	73.3	11.658		110.2	102.4	103.2	105.267	4.29108		105.2	110.8	148.2	121.4	23.3778
HisC	78.1	63.1	61.1	67.4333	9.29157		107.1	96.7	120.5	108.1	11.9315		118.5	98	156.9	124.467	29.8999
HisD	77.9	38.8	71.7	62.8	21.0145		122.4	148.1	96.3	122.267	25.9003		79.9	103.7	161.2	114.933	41.7979
HisF	85.9	84	80.2	83.3667	2.9023		105.9	112.5	107.9	108.767	3.38428		92.3	87.3	144	107.867	31.3921
HisG	80.7	64.9	64.7	70.1	9.18041		132	103.3	106.3	113.867	15.7754		94.1	100.4	153.6	116.033	32.6858
HisH	83.6	124.9	53.6	87.3667	35.7989		126.2	57.3	85.6	89.7	34.6325		116.4	103.8	148.5	122.9	23.048
HisI	60.5	90.6	77.1	76.0667	15.0766		110.6	118.5	107.4	112.167	5.71343		95.3	93.7	146.3	111.767	29.9174
HisJ	60.6	45.2	49.4	51.7333	7.96074		97.7	107.6	108.7	104.667	6.05833		111.9	117.7	201.1	143.567	49.9097
HisM	0	0	0	0	0		0	0	0	0	0		296.2	386.3	217.5	300	84.4641
HisP	51.7	9.3	58.2	39.7333	26.5557		84.7	50.6	75.4	70.2333	17.6273		146.6	181.5	242	190.033	48.2691
HisS	103.5	104.2	107	104.9	1.85203		100	107.6	83.6	97.0667	12.2659		93.4	78.4	122.3	98.0333	22.3137
HiuH	0	0	0	0	0		0	0	0	0	0		0	0	0	0	0
HldD	101.7	97.3	101.7	100.233	2.54034		104.6	95.2	89.7	96.5	7.53459		112.4	108.7	88.7	103.267	12.75
HldE	101.3	96.9	100.7	99.6333	2.38607		108.5	96.3	110.9	105.233	7.82901		83.2	88.5	113.8	95.1667	16.3531
Hmp	76.5	79.2	85.5	80.4	4.61844		91.8	72.8	131.9	98.8333	30.1712		103	91	168.3	120.767	41.6
Hns	121.8	81.5	106.8	103.367	20.3682		99	92.4	117.5	102.967	13.0117		108	95.3	77.7	93.6667	15.2159
HolA	74.8	102.7	97	91.5	14.7408		118.7	115.7	87.7	107.367	17.0978		123.7	95.3	84.4	101.133	20.289
HolB	120.6	111.2	95.5	109.1	12.6811		90.2	79.4	80.3	83.3	5.9925		83.3	117.2	122.2	107.567	21.1637
HolC	87.4	113	103.6	101.333	12.9496		119.4	108.2	84.4	104	17.874		85.7	92.4	105.8	94.6333	10.2344
HolD	122.4	101.2	77.1	100.233	22.6655		99.3	85.6	100.9	95.2667	8.40972		135.5	92.7	85.3	104.5	27.1006
HolE	0	71.3	154.2	75.1667	77.1727		101.9	97.7	75.8	91.8	14.0146		81.7	171.9	145.5	133.033	46.3743
Hpt	103.5	134.8	91.3	109.867	22.438		92.3	109.4	77.5	93.0667	15.9638		87.9	110.6	92.8	97.1	11.9453
HrpA	98.2	97.9	93.9	96.6667	2.40069		100.3	88.7	90.7	93.2333	6.20108		120.9	105.8	103.6	110.1	9.41754
HscA	138.7	96.6	132.7	122.667	22.7729		96.4	101.1	94.3	97.2667	3.48186		85.7	80.8	73.8	80.1	5.9808
HscB	127.9	127	116.9	123.933	6.10765		90.2	88.8	79.9	86.3	5.58659		112.7	65.2	91.4	89.7667	23.7921
HscC	0	0	0	0	0		0	0	0	0	0		0	0	0	0	0
HsdM	94.9	114.7	93.7	101.1	11.7932		92.3	98	95.1	95.1333	2.85015		108.2	101.2	101.9	103.767	3.8553
HsdR	81.5	81.3	88.3	83.7	3.98497		98.7	105.1	98	100.6	3.9128		107.6	119	120.6	115.733	7.08896
HsdS	102.4	90.7	95.4	96.1667	5.88756		93.7	93.9	91.9	93.1667	1.10151		120.2	106.4	105.4	110.667	8.27124
HslJ	94.5	82.7	84.5	87.2333	6.35715		92.5	91.6	71.1	85.0667	12.1039		140.2	140.9	102	127.7	22.2596
HslO	100.6	98.8	106.9	102.1	4.25323		99.7	91.7	90.6	94	4.96689		102.6	101.4	107.6	103.867	3.28836
HslR	100.1	247.5	81.9	143.167	90.8124		86.1	130.4	0	72.1667	66.3072		0	64.2	189.9	84.7	96.5955
HslU	103.1	86.6	96.4	95.3667	8.29839		105.8	105.5	104.7	105.333	0.568624		92.7	94.4	110.9	99.3333	10.053
HslV	110.8	86.8	89.6	95.7333	13.123		101.2	88	87.5	92.2333	7.76938		110.5	100.4	125.2	112.033	12.4709
HspQ	66.8	69.8	94.8	77.1333	15.3731		111.3	140.3	94.5	115.367	23.1692		70.7	137.5	114.3	107.5	33.9152
HtpG	96.8	105.4	90.7	97.6333	7.38535		103.2	98.6	102	101.267	2.38607		92.2	89.5	121.6	101.1	17.8048
HtpX	102.3	123.1	102	109.133	12.0964		170.2	128.5	138.7	145.8	21.7378		40	54.8	40.3	45.0333	8.45951
HtrL	141.5	86.8	91.3	106.533	30.3655		107.4	91.2	92.7	97.1	8.95154		102.9	83.4	102.8	96.3667	11.2296
HupA	107.6	139.4	103.8	116.933	19.5493		98.8	113.3	98.6	103.567	8.42991		56.2	86.6	95.8	79.5333	20.7242
HupB	82.8	86.1	113.4	94.1	16.7955		78.1	73.7	122.5	91.4333	26.9943		124.4	119.2	99.8	114.467	12.9651
HxpA	84.9	82	68.4	78.4333	8.80928		115.1	112.6	87.5	105.067	15.2644		130.2	95.4	123.9	116.5	18.5427
HxpB	80.8	144.2	93.1	106.033	33.6206		117.6	104.3	116.4	112.767	7.35686		73.3	86.6	83.7	81.2	6.99357
HybC	100	136.1	96.7	110.933	21.8573		105.6	125.5	68.4	99.8333	28.9835		71.2	76.8	119.6	89.2	26.4756
HybD	900	0	0	300	519.615		0	0	0	0	0		0	0	0	0	0
HybO	145.2	124.8	165.2	145.067	20.2003		127.7	69.9	75.1	90.9	31.9756		0	102.6	89.5	64.0333	55.84
HycI	44.8	93	137.2	91.6667	46.2144		110.4	106.6	106.3	107.767	2.28546		108.4	80.4	112.8	100.533	17.5742
HypB	88.6	166.2	75.2	110	49.1296		90.7	105.6	90.9	95.7333	8.54537		97.4	103.5	81.9	94.2667	11.1357
HypE	115.9	96.7	120.9	111.167	12.7755		91.9	37.7	109.7	79.7667	37.5022		81.8	100.4	145	109.067	32.4791
HyuA	116.8	82.8	89.3	96.3	18.0485		114	85.1	77.9	92.3333	19.1061		91.7	116.9	125.5	111.367	17.5663
IadA	77.8	76.1	90.1	81.3333	7.63959		201.5	0	302.7	168.067	154.095		91.2	60.7	0	50.6333	46.4259
IbaG	126.6	102.8	138.2	122.533	18.047		76.4	81.9	73.3	77.2	4.35546		112.9	89	98.9	100.267	12.0085
IbpA	91.9	27.1	81	66.6667	34.6964		85.9	67.8	88.2	80.6333	11.1733		187.3	143.9	126.9	152.7	31.1467
IbpB	44.5	33	39	38.8333	5.75181		105.1	84.8	97.5	95.8	10.2562		185.5	168.6	141.9	165.333	21.9828
Icd	39.4	42.8	46.3	42.8333	3.45012		86.8	88.1	83.7	86.2	2.26053		149.8	164.7	198.6	171.033	25.0089
IclR	79.4	160.5	86.1	108.667	45.0138		98.7	104.1	79.6	94.1333	12.8726		81.4	94.5	115.7	97.2	17.3087
Idi	84.1	122.1	83	96.4	22.2636		94.9	80.4	87.1	87.4667	7.25695		127.1	95.8	125.4	116.1	17.6009
IhfA	101.7	83	102.4	95.7	11.0041		112.1	133.8	103.9	116.6	15.4496		76.3	106.5	80.4	87.7333	16.3812
IhfB	98.7	79.2	116.7	98.2	18.755		85.3	89.6	119.1	98	18.3992		125.6	115.3	70.5	103.8	29.2949
IleS	105	113.8	102.7	107.167	5.85861		95.2	105.6	95.6	98.8	5.89237		90.5	91.9	99.8	94.0667	5.01431
IlvA	74.2	86.4	54.6	71.7333	16.0429		128.1	110.3	105	114.467	12.1006		128.7	118.3	94.3	113.767	17.6424
IlvB	46	65.8	39.6	50.4667	13.6592		111.7	114.3	107.9	111.3	3.2187		131.8	135	147.9	138.233	8.52311
IlvC	10.3	8.4	6.5	8.4	1.9		160.6	132	124.6	139.067	19.0119		136.1	165.3	156.1	152.5	14.9292
IlvD	78.2	69.8	62.6	70.2	7.80769		131.6	106.5	126.2	121.433	13.2115		103.2	89.8	132.1	108.367	21.6181
IlvE	47.7	45	53.3	48.6667	4.2336		115.1	106.5	128.2	116.6	10.9275		176.3	128.2	99.8	134.767	38.6704
IlvH	39	12	29.3	26.7667	13.6771		147.4	165.9	160.5	157.933	9.51332		119.3	127.6	99.1	115.333	14.6582
IlvI	25.9	16.7	12.7	18.4333	6.76855		190.5	174.7	169.2	178.133	11.0573		128.8	88.5	93.1	103.467	22.0595
IlvN	66.8	39.1	70.5	58.8	17.1607		125.1	101.8	129.5	118.8	14.8859		135.7	106.8	124.7	122.4	14.5866
IlvY	125	80.3	129	111.433	27.0363		144.2	37.5	104	95.2333	53.8875		98.2	101.9	79.9	93.3333	11.7798
InaA	119.9	13	112.9	81.9333	59.8005		135.6	146.4	125.3	135.767	10.551		155.7	57.5	33.8	82.3333	64.633
InfA	127.5	96.3	135.9	119.9	20.8653		91.1	93.4	74	86.1667	10.5992		78.2	122.3	81.3	93.9333	24.6151
InfB	114.2	103.4	110.6	109.4	5.49909		99	103.9	98.7	100.533	2.91947		84.8	89.3	96.1	90.0667	5.68888
InfC	118.4	125.4	115.6	119.8	5.04777		100	89.2	94.2	94.4667	5.40494		89	81.1	87.2	85.7667	4.14045
InsC4	117.8	134.7	139.5	130.667	11.3984		85.6	102.3	74.6	87.5	13.9474		88.2	71.6	85.6	81.8	8.92861
InsE4	149.9	43.5	30.2	74.5333	65.6073		139.7	104.3	192.2	145.4	44.2263		79.6	56.5	104.2	80.1	23.8539
InsH	110.2	82.2	131.6	108	24.7734		102.1	84.8	106.8	97.9	11.5858		111.5	104.2	66.6	94.1	24.0938
InsL2	102.2	141.5	110.6	118.1	20.6957		127.2	90	77.2	98.1333	25.9733		106.8	65.5	79	83.7667	21.0586
InsO2	0	0	0	0	0		0	0	0	0	0		0	0	0	0	0
IntA	105.8	100.5	120.3	108.867	10.25		96.5	107.5	91.9	98.6333	8.01582		88.2	98.7	90.7	92.5333	5.48483
IntF	190	133.5	175	166.167	29.2674		171	112.9	0	94.6333	86.9512		0	117.6	0	39.2	67.8964
IntS	88.2	73.1	102.9	88.0667	14.9004		77.8	156	94.8	109.533	41.1292		98.1	100	109.1	102.4	5.87963
IntZ	120.3	57.4	96.4	91.3667	31.7506		88.7	100.1	173.6	120.8	46.08		88.4	104.7	70.4	87.8333	17.157
IraP	94.9	28.5	52.2	58.5333	33.65		118.7	121.9	69.1	103.233	29.6036		130.4	79.8	204.5	138.233	62.718
IscA	117.5	88.7	112.8	106.333	15.4507		97.4	104.7	95.7	99.2667	4.78156		90.1	97.7	95.5	94.4333	3.91067
IscR	98.7	118.6	130.9	116.067	16.2488		110	86.2	113.8	103.333	14.9591		93.7	80.2	67.8	80.5667	12.9539
IscS	114	104.2	110.1	109.433	4.9339		106.5	98.4	99.3	101.4	4.43959		97.7	90.1	79.6	89.1333	9.08864
IscU	124.5	91.8	116.8	111.033	17.0957		112.3	104.2	99.7	105.4	6.38514		80.1	88.3	82.4	83.6	4.22966
IscX	115.6	156.9	110	127.5	25.6146		89.7	90.4	84.3	88.1333	3.33816		74.5	92.2	86.4	84.3667	9.02349
IspA	102.4	109.1	127.5	113	12.9965		92	110.3	81.7	94.6667	14.4853		104.7	89.7	82.5	92.3	11.3261
IspB	110.3	102.7	90.9	101.3	9.77548		100.3	99.9	95.5	98.5667	2.66333		105.3	97.5	97.6	100.133	4.47474
IspD	118.6	89.1	142.6	116.767	26.7971		108.9	100.6	57.1	88.8667	27.822		86.9	60.8	135.5	94.4	37.9106
IspE	95.7	61.1	97.3	84.7	20.4539		89.1	110.4	99.8	99.7667	10.65		92.9	126	127.6	115.5	19.5885
IspG	120.8	112.8	103.2	112.267	8.81211		100.9	100.6	105.3	102.267	2.63122		78.8	81.1	96.6	85.5	9.68143
IspH	107.3	102.2	96.4	101.967	5.45374		104.2	100.9	109.5	104.867	4.33859		91.8	95.9	91.9	93.2	2.3388
IspU	102.5	105.7	104.4	104.2	1.60935		85.4	107.8	117.6	103.6	16.5058		82.6	119	75	92.2	23.5185
Ivy	80.6	134.2	79.6	98.1333	31.2387		76.8	65.7	83.3	75.2667	8.89963		208.6	82.8	88.5	126.633	71.0424
KatE	58.2	29.9	71.3	53.1333	21.1599		78.2	121.1	93.6	97.6333	21.7325		191.6	121.7	134.4	149.233	37.236
KatG	101.3	100.8	101	101.033	0.251661		95.9	110.7	116.6	107.733	10.6641		85.1	95.8	92.9	91.2667	5.53384
KbaZ	91.6	109.5	62.1	87.7333	23.9354		79.6	104.4	48.9	77.6333	27.8022		132.8	69.1	202.1	134.667	66.5196
Kbl	135.3	131.9	130	132.4	2.68514		94	90.7	114.6	99.7667	12.9516		69.6	66.4	67.5	67.8333	1.62583
Kbp	157.8	163.5	141.8	154.367	11.25		77.3	81.9	105	88.0667	14.844		59.3	56	57.4	57.5667	1.6563
Kch	56	93.6	64.7	71.4333	19.6836		101.1	98.8	110.5	103.467	6.19866		108.7	121	145.6	125.1	18.7886
KdgK	99	98.1	98.2	98.4333	0.493288		106.3	117.4	92.7	105.467	12.3711		84.9	91.4	112	96.1	14.1481
KdgR	86.9	106.5	100.7	98.0333	10.0684		94.5	92.3	92.6	93.1333	1.19304		95.2	118	113.3	108.833	12.0384
KdpD	106.1	74.1	94.8	91.6667	16.2285		75.1	69.7	87.4	77.4	9.07138		98	139.8	155	130.933	29.5163
KdsA	98.8	86	88.4	91.0667	6.80392		89.2	84.2	110.7	94.7	14.0801		116.8	108	117.9	114.233	5.42617
KdsB	114.3	93.2	94.2	100.567	11.9039		117.5	60.6	101	93.0333	29.2746		106.8	104.2	108.1	106.367	1.98578
KdsC	140.4	0	110.4	83.6	73.9373		69	57.1	91.3	72.4667	17.3615		250.8	181	0	143.933	129.443
KdsD	88.4	103.5	85.8	92.5667	9.55737		101.3	111.1	90.4	100.933	10.3549		99.1	83	137.4	106.5	27.9448
KduD	61.5	86.8	73.8	74.0333	12.6516		70.9	108.7	97.1	92.2333	19.3642		88.8	101.7	210.8	133.767	67.0239
KefC	87.4	69.9	127.8	95.0333	29.6952		67.5	80	72.4	73.3	6.29841		177.4	149.1	68.3	131.6	56.6162
KefF	62.3	28.4	82.9	57.8667	27.5191		93.5	0	44.1	45.8667	46.775		154.9	255.5	178.5	196.3	52.6091
KgtP	35.1	40.2	57.4	44.2333	11.6843		62.9	57.4	67	62.4333	4.81698		179.6	184.5	216	193.367	19.7536
KptA	176.5	116.8	102	131.767	39.4406		105.1	30	50.5	61.8667	38.8189		120.4	81.9	116.8	106.367	21.2651
Kup	111.9	113.1	117.3	114.1	2.83549		93.7	83.3	96.6	91.2	6.99357		105.9	108.5	69.7	94.7	21.6896
LacI	62.4	90.6	138.5	97.1667	38.4726		95.2	79.7	131.3	102.067	26.4765		77.1	124.2	101	100.767	23.5509
LacZ	43.5	66.6	52.9	54.3333	11.6165		79	95.7	95.3	90	9.52838		139.8	115.5	211.7	155.667	50.0242
LamB	45.5	42.3	54.8	47.5333	6.49333		65.8	125	120.1	103.633	32.8561		133.9	200.2	112.2	148.767	45.845
LapA	143.7	111.7	73.3	109.567	35.2485		88.7	73.3	94.3	85.4333	10.8744		152.4	78.7	83.8	104.967	41.1575
LapB	84.5	77.2	115.7	92.4667	20.449		93.3	91.4	104.2	96.3	6.90724		92.4	110.7	130.5	111.2	19.0549
LasT	105.3	76.4	75.6	85.7667	16.9211		110.2	93.2	135.9	113.1	21.4972		119.9	89.3	94.2	101.133	16.436
LdcA	112	70.7	146.5	109.733	37.9508		129.7	106.7	84.2	106.867	22.7505		86.7	90.8	72.8	83.4333	9.43416
LdcC	110.9	67	121.4	99.7667	28.8583		85.1	53.3	114.5	84.3	30.6078		154.6	113.2	79.9	115.9	37.4231
LdhA	76.1	72	82	76.7	5.02693		104.7	99.1	88.7	97.5	8.11911		137.1	112.6	127.7	125.8	12.36
LepA	109	107.2	111	109.067	1.90088		90.3	95.2	95.5	93.6667	2.91947		98.1	90.8	102.9	97.2667	6.09289
LepB	117.6	123.8	105.6	115.667	9.25275		92.7	91.4	94.8	92.9667	1.71561		76.9	84.6	112.7	91.4	18.8438
LeuA	26.3	30.6	26.2	27.7	2.51197		136.2	159.6	111.6	135.8	24.0025		152.3	159.2	98.1	136.533	33.4626
LeuB	24.9	22	21.1	22.6667	1.98578		130.9	114.2	117.7	120.933	8.807		172.2	174.8	122.1	156.367	29.7043
LeuC	30.8	17.9	25.8	24.8333	6.5041		146.2	127	113.6	128.933	16.3858		156.2	161.1	121.5	146.267	21.588
LeuD	13.3	51.2	12.6	25.7	22.0864		109.9	205.4	120.3	145.2	52.3934		107.7	144.5	135.1	129.1	19.1196
LeuS	109.4	100.3	109.1	106.267	5.16946		99.4	95.1	106	100.167	5.49029		96.6	91.4	92.7	93.5667	2.70617
LexA	114.3	112.6	102.2	109.7	6.55057		97.6	103.1	105	101.9	3.84318		105.8	87.3	72.1	88.4	16.8769
LgoT	0	0	0	0	0		0	0	0	0	0		0	0	0	0	0
Lgt	80.8	116.6	105.1	100.833	18.2774		87.5	104.2	72	87.9	16.1037		107.2	92.4	134.1	111.233	21.1406
LhgD	48.6	37.7	29.9	38.7333	9.39273		55.6	53.1	59.9	56.2	3.43948		231.1	192.7	191.4	205.067	22.5549
LigA	111	103	112	108.667	4.93288		86.8	83.6	83.7	84.7	1.81934		97.1	97.6	125.2	106.633	16.0811
LipA	103.8	97.7	92.7	98.0667	5.55908		98.1	104.7	91.4	98.0667	6.65006		127	96.6	88.1	103.9	20.4517
LipB	131.7	111.8	95.6	113.033	18.0816		113.1	136.6	100	116.567	18.5446		32.2	97.8	81.3	70.4333	34.1234
LivJ	22	21.8	12.2	18.6667	5.60119		133.6	138.4	119.1	130.367	10.0481		191.5	192.4	69	150.967	70.9866
LivK	17.5	5.7	16.3	13.1667	6.4941		129.7	125.9	151.4	135.667	13.7573		183.4	171.5	98.7	151.2	45.854
LldD	28.3	42	40.4	36.9	7.49066		87	99	108.7	98.2333	10.8703		139.4	143.3	211.9	164.867	40.7787
LldP	24.2	48.6	52.4	41.7333	15.3027		61.3	148	102	103.767	43.377		167.8	171.1	124.6	154.5	25.9467
LldR	44.2	36.2	63.7	48.0333	14.1451		87.4	92.3	96.7	92.1333	4.65224		197.3	159.8	122.4	159.833	37.45
Lnt	115.7	128	102.5	115.4	12.7526		74.4	86.2	91.6	84.0667	8.79621		72.8	90.3	138.5	100.533	34.0245
LoiP	83.4	74.5	80.8	79.5667	4.57639		112.1	106.8	117.3	112.067	5.25008		101	105.4	118.8	108.4	9.27146
LolA	101.4	128.4	100	109.933	16.0079		115.7	102.2	105.3	107.733	7.0713		75.8	73.7	97.5	82.3333	13.1766
LolB	78	109.4	91.3	92.9	15.761		116.4	94.4	101.4	104.067	11.2398		111.2	88.4	109.7	103.1	12.7526
LolC	101.9	104.7	95	100.533	4.99233		100.4	94.3	102.7	99.1333	4.34089		104.7	93.5	102.8	100.333	5.99361
LolD	89.5	109.1	100.5	99.7	9.82446		125	92.7	91.8	103.167	18.9136		104	97.1	90.3	97.1333	6.85006
LolE	100.8	88.5	104.3	97.8667	8.29839		107.8	109.3	96.4	104.5	7.05479		96	105.3	91.5	97.6	7.03776
Lon	99.2	102.6	96.4	99.4	3.10483		100.1	105.6	95.2	100.3	5.20288		92.9	97.5	110.4	100.267	9.07212
LpdA	79.1	66.3	68.1	71.1667	6.92917		87.8	84.2	103.3	91.7667	10.1491		146.2	128	137.1	137.1	9.1
LplA	105.6	113.1	118.5	112.4	6.47843		93	102.2	118.3	104.5	12.8059		81.7	87.2	80.3	83.0667	3.64737
LpoA	91.6	85.5	83.5	86.8667	4.2194		108.6	88.5	110.6	102.567	12.2231		105	95.4	131.3	110.567	18.5861
LpoB	76.3	85.5	76.3	79.3667	5.31162		96.7	106.8	98.4	100.633	5.40771		119.2	108.6	132.3	120.033	11.872
Lpp	96.2	98.6	109.1	101.3	6.86076		110	103.7	100.7	104.8	4.74658		99.6	119.7	62.4	93.9	29.0722
LptA	104.4	112.9	127.9	115.067	11.8989		91.8	100.2	97	96.3333	4.2395		71.8	114.1	80	88.6333	22.4326
LptB	103.4	110.4	95.2	103	7.60789		85.2	87.3	100.7	91.0667	8.40853		113.4	94.9	109.4	105.9	9.73396
LptC	91.4	107	101.6	100	7.92212		85.4	99	84	89.4667	8.28573		98.8	94.4	138.5	110.567	24.2908
LptD	112.2	73.1	120	101.767	25.1305		82.8	83.8	111.4	92.6667	16.2312		121.5	109.9	85.3	105.567	18.4849
LptE	98.4	89.9	88.6	92.3	5.32259		80.9	87.8	159.8	109.5	43.6975		122.8	91.7	80.1	98.2	22.0796
LptF	103.7	71	116.7	97.1333	23.547		97.3	92.3	104.4	98	6.0803		105.1	122.2	87.3	104.867	17.4512
LptG	128.5	128.5	92	116.333	21.0733		94.7	90.4	84.2	89.7667	5.27857		94.5	99.1	88	93.8667	5.57704
LpxA	108.4	118.5	102.9	109.933	7.91223		64.7	120.2	100.5	95.1333	28.1365		118.6	91	75.1	94.9	22.0107
LpxB	96.3	155.2	109.5	120.333	30.9083		90.9	80.4	94.5	88.6	7.32598		103.3	85.2	84.6	91.0333	10.6275
LpxC	59.6	40.5	51.5	50.5333	9.58662		67.2	72.9	93.8	77.9667	14.0051		184.5	169.4	160.6	171.5	12.0876
LpxD	100.8	136.4	102.6	113.267	20.0543		76.5	91.3	92.1	86.6333	8.78484		131.8	88.9	79.6	100.1	27.844
LpxH	131.9	107.3	138.1	125.767	16.2903		78.5	103.9	73.6	85.3333	16.2648		94.7	99.8	72.2	88.9	14.6857
LpxK	146.1	56.5	115.8	106.133	45.5755		113	116.4	113.1	114.167	1.93477		65.3	112.4	61.4	79.7	28.3861
LpxL	165.6	136	192.4	164.667	28.2116		146.8	45.7	136.3	109.6	55.5875		41.5	26.7	9	25.7333	16.2715
LpxM	113.3	120.3	94.1	109.233	13.5652		81.9	103.9	92.2	92.6667	11.0074		80.6	111.8	101.9	98.1	15.9433
LpxT	181	245.9	170.9	199.267	40.7002		52	47.7	34	44.5667	9.40018		50.9	59.7	57.9	56.1667	4.64901
Lrp	56.9	46.5	60.7	54.7	7.35119		105	100.8	145.7	117.167	24.7997		124.2	150.5	109.6	128.1	20.727
LsrA	0	0	0	0	0		102.6	163.6	115.3	127.167	32.1848		294.7	0	223.8	172.833	153.819
LsrB	209.7	151.8	203.4	188.3	31.7665		79	79.3	79.8	79.3667	0.404145		23.6	34.6	38.9	32.3667	7.89071
LsrF	137.1	94.8	114	115.3	21.1799		108.8	102.4	94.9	102.033	6.95725		69.4	84.1	94.4	82.6333	12.5644
LtaE	141.8	123.9	103.6	123.1	19.1126		96.2	82.7	79.9	86.2667	8.71569		96.2	91.7	83.8	90.5667	6.27721
LuxS	84.1	72.4	97.1	84.5333	12.3557		96.5	91.3	91.3	93.0333	3.00222		139.8	107.5	120.1	122.467	16.2795
LysC	105	94.8	96.3	98.7	5.50727		139.2	104.1	102.2	115.167	20.8351		86.7	70.8	100.9	86.1333	15.058
LysP	110.5	98.5	104.5	104.5	6		100.8	96.6	116.3	104.567	10.3761		103.3	98.3	71.1	90.9	17.3286
LysR	100.2	78.3	94.4	90.9667	11.3465		98.8	162	38.2	99.6667	61.9046		70.9	92.6	164.5	109.333	48.9923
LysS	103.9	108.7	107.5	106.7	2.498		100.1	99.9	87.2	95.7333	7.39076		90.1	95.6	106.9	97.5333	8.56524
LysU	136.6	179.2	135.6	150.467	24.8888		67.4	81.4	73.1	73.9667	7.04012		69.7	66.8	90.2	75.5667	12.7555
Maa	63.6	94.1	99.3	85.6667	19.2864		94.1	61.6	97	84.2333	19.6546		117.5	132.2	140.7	130.133	11.7373
MacA	76.5	44.8	92.7	71.3333	24.3644		59.4	115	96.8	90.4	28.3471		111.4	141.1	162.4	138.3	25.615
MacB	32.8	134.4	16.9	61.3667	63.7464		98.3	60.9	88.4	82.5333	19.3779		110.9	114.1	243.2	156.067	75.4766
MaeA	146.1	148.4	137.9	144.133	5.51936		74.2	79.6	81.1	78.3	3.62905		77.3	81	74.3	77.5333	3.35609
MaeB	82.7	93.7	88.1	88.1667	5.5003		104.4	83.5	116.8	101.567	16.8298		113.3	96.1	121.3	110.233	12.8769
Mak	68.5	68.3	59.1	65.3	5.37029		99.1	102.3	96.3	99.2333	3.00222		203.2	109.9	93.4	135.5	59.2075
MalE	91.7	89.8	87.3	89.6	2.20681		84.7	78.1	68.8	77.2	7.98812		141.7	159.5	98.5	133.233	31.369
MalF	121.3	84.9	91.6	99.2667	19.3733		64.2	71.1	73.3	69.5333	4.74798		149.4	143.8	100.2	131.133	26.935
MalG	0	32.4	0	10.8	18.7061		154.1	0	98.3	84.1333	78.0207		570.2	0	45	205.067	317.014
MalI	95.6	52.7	62.1	70.1333	22.55		107.1	172.8	91.8	123.9	43.0341		92.7	117.2	108	105.967	12.3759
MalK	99.4	89.6	95.5	94.8333	4.9339		80.3	85.2	64.9	76.8	10.5929		138.6	155.5	91	128.367	33.4455
MalM	127.5	116	113.2	118.9	7.57826		65.7	73	75.1	71.2667	4.9339		114.4	129.9	85.2	109.833	22.6972
MalP	68.7	65.4	65.6	66.5667	1.85023		86.7	82.2	71.6	80.1667	7.75263		174	188.5	97.5	153.333	48.8936
MalQ	79.8	75.7	69.8	75.1	5.02693		87.9	81.1	73	80.6667	7.45945		172.6	162.8	97.4	144.267	40.8824
MalS	88.6	52.2	52.5	64.4333	20.9295		65.6	89.1	63.9	72.8667	14.0842		222.9	195.3	69.8	162.667	81.6003
MalT	64.3	73.6	69.7	69.2	4.67012		102.4	111.8	107.9	107.367	4.72264		128.8	127.6	113.9	123.433	8.27788
MalX	0	136.9	148.2	95.0333	82.495		188.3	181.5	186.6	185.467	3.53883		0	58.5	0	19.5	33.775
MalY	110.1	67.7	115.1	97.6333	26.0433		126.4	127.2	97.5	117.033	16.9211		97.5	68.4	90.1	85.3333	15.1243
MalZ	122.5	57	66.2	81.9	35.4603		124.3	85.2	100.5	103.333	19.7034		165.8	133.5	45	114.767	62.5409
ManA	93.8	129.9	98.6	107.433	19.6042		103.5	104.7	108.2	105.467	2.44199		92.3	88.5	80.6	87.1333	5.96853
ManX	50.8	112.8	75	79.5333	31.2476		110.2	143.6	106	119.933	20.6032		120.2	98.3	83.3	100.6	18.5572
ManY	65.4	83.2	70.1	72.9	9.22442		142.6	125.3	125.2	131.033	10.0172		105.5	124.7	58.1	96.1	34.2806
ManZ	55.4	73.4	90.7	73.1667	17.6512		101.6	123.3	109.1	111.333	11.021		144.7	117.3	84.6	115.533	30.0889
Map	93.8	114.3	91.7	99.9333	12.4861		112.9	106.1	97.1	105.367	7.92549		86.3	99.1	98.7	94.7	7.27736
MarR	104.8	92.3	80.2	92.4333	12.3005		127.8	129.8	150.3	135.967	12.4532		87.3	76.1	51.3	71.5667	18.4232
MatP	76.4	96.1	77	83.1667	11.2046		99.1	78.9	115.2	97.7333	18.1885		133	118.6	105.6	119.067	13.706
MazF	81.7	144.9	116.2	114.267	31.6443		80.7	82.5	115.3	92.8333	19.4775		97.2	67	114.5	92.9	24.0402
MazG	120.4	124.3	64.6	103.1	33.399		148	95.8	75	106.267	37.6087		85.6	69.6	116.8	90.6667	24.0044
McrB	127.3	106.4	115.6	116.433	10.4749		87.6	70.6	96.1	84.7667	12.984		106.5	83.2	106.6	98.7667	13.4812
MdaB	88.9	72.3	89	83.4	9.61301		92.6	95.4	130.9	106.3	21.3502		116.3	94.6	120	110.3	13.7219
Mdh	63.3	67.3	57.7	62.7667	4.82217		95.1	99.3	106.1	100.167	5.55098		132	113.7	165.5	137.067	26.2691
MdlB	105.5	97.9	189.9	131.1	51.0639		87.6	50.2	87.4	75.0667	21.5354		75.2	87.8	118.5	93.8333	22.2716
MdoB	171	230	220.4	207.133	31.6584		42.9	52.5	56.7	50.7	7.0739		41.2	37.2	48.1	42.1667	5.51392
MdoD	100.3	96.7	94.6	97.2	2.88271		116.6	114.4	110.9	113.967	2.8746		93.5	90	82.9	88.8	5.40093
MdoG	94.7	107.7	100.7	101.033	6.50641		94.3	99.3	102.3	98.6333	4.04145		96.4	97.1	107.5	100.333	6.21638
MdoH	112	91.7	119	107.567	14.1797		97.5	102.3	99.6	99.8	2.40624		98.2	96.5	83.3	92.6667	8.15618
MdtA	115.6	78.4	106.6	100.2	19.4082		102.5	39.6	116.9	86.3333	41.1077		139.7	62.6	138	113.433	44.0312
MdtB	135.8	96.1	130	120.633	21.4435		72.6	76.1	89.3	79.3333	8.807		79.1	97.9	123	100	22.0252
MdtE	236.8	162.3	188.6	195.9	37.7827		119.7	106.7	75.6	100.667	22.6606		0	10.2	0.2	3.46667	5.8321
MdtF	293.3	234.2	217.2	248.233	39.9438		78.8	76.6	0	51.8	44.8736		0	0	0	0	0
MdtK	81.7	142.8	73.5	99.3333	37.8659		115.5	100.6	95.5	103.867	10.3925		108.3	82.3	99.7	96.7667	13.2459
MenA	94.4	191.4	86.2	124	58.5139		93.9	93.1	72.4	86.4667	12.1887		115.5	101.1	52	89.5333	33.2927
MenB	112.8	106.2	100.1	106.367	6.35164		113.5	92.9	98.4	101.6	10.6663		96.9	76.3	102.9	92.0333	13.9518
MenC	213.4	71	181.2	155.2	74.6756		151.5	154.5	127.1	144.367	15.0284		0	0	1.4	0.466667	0.80829
MenD	103	150.7	90.1	114.6	31.9219		91.3	82.8	85.1	86.4	4.39659		98	95.2	103.9	99.0333	4.4411
MenF	111.2	145.5	115	123.9	18.8024		89.6	82.5	83	85.0333	3.96274		93.2	86.2	93.9	91.1	4.25793
MenI	71.1	69.2	73.4	71.2333	2.10317		113.4	120	113.9	115.767	3.67469		97.3	128.8	112.9	113	15.7502
MepA	80.9	112.4	120.3	104.533	20.8447		111.1	98	89.9	99.6667	10.6978		105.8	97.3	84.4	95.8333	10.7751
MetAS	0	0	0	0	0		0	0	0	0	0		317.7	266	316.3	300	29.4532
MetB	29.5	52.1	72.1	51.2333	21.3132		55.6	190.8	75.2	107.2	73.06		207.8	31.8	185.2	141.6	95.7587
MetC	64.5	83.1	73	73.5333	9.31146		125.3	117.7	98.8	113.933	13.6456		108.7	89.6	139.4	112.567	25.1242
MetE	112.5	71	69.6	84.3667	24.3742		86.4	71.9	97.1	85.1333	12.6477		133.8	117.3	140.6	130.567	11.9818
MetF	93.9	29.3	59	60.7333	32.3349		137.5	156.9	93.5	129.3	32.4857		78.9	134.8	116.2	109.967	28.4665
MetG	83.5	92.9	94	90.1333	5.7709		91.9	90.1	90.9	90.9667	0.90185		107.7	108.1	140.9	118.9	19.0536
MetH	93.7	89.2	94.1	92.3333	2.72091		111.3	111	106.1	109.467	2.91947		94.6	96.7	103.3	98.2	4.53982
MetI	94.8	137.4	95.2	109.133	24.4805		110.3	98.2	83.3	97.2667	13.5242		91.9	97.9	91	93.6	3.751
MetJ	150.1	74.3	112.3	112.233	37.9		98	85.7	113.5	99.0667	13.9307		119.5	93.6	53.1	88.7333	33.4665
MetK	111.5	93.3	101.2	102	9.12634		91.4	87.7	83.1	87.4	4.15812		108.1	105.8	117.9	110.6	6.42573
MetL	104.6	112.1	91.3	102.667	10.5339		91.9	75.9	96.3	88.0333	10.7356		92.9	112.4	122.6	109.3	15.0907
MetN	118.5	91.4	97.4	102.433	14.2339		115	110.6	83.2	102.933	17.2306		93.9	97.3	92.7	94.6333	2.38607
MetQ	84.2	85	72.2	80.4667	7.17031		95.7	95.4	99.2	96.7667	2.11266		127.2	124.6	116.5	122.767	5.58062
MetR	196.1	67.3	87.3	116.9	69.3144		94.4	98.4	140.2	111	25.3669		27.3	70	119	72.1	45.8861
Mfd	91.8	98.9	79.1	89.9333	10.0311		117.6	99.3	110.9	109.267	9.25869		107.7	93.8	101	100.833	6.9515
MglA	42.9	71.5	54	56.1333	14.4189		82.9	104.9	146.5	111.433	32.2994		141.1	115.2	141	132.433	14.9246
MglB	43.7	87.4	52.3	61.1333	23.1504		96.6	126.9	116.4	113.3	15.386		123.9	122.2	130.7	125.6	4.49778
MglC	39	103.3	64.8	69.0333	32.3584		96.2	113.3	123.2	110.9	13.6591		105.1	97.9	157.1	120.033	32.3019
MgsA	71.2	112.9	98.6	94.2333	21.1902		136.4	117.7	91.1	115.067	22.7645		113.6	72.9	85.5	90.6667	20.8361
MgtA	321.6	258	298.1	292.567	32.159		3.5	2.5	1.5	2.5	1		0	4.2	10.7	4.96667	5.39104
MhpC	0	0	0	0	0		0	0	0	0	0		421	272.5	206.6	300.033	109.82
MhpF	0	30.5	54.4	28.3	27.2666		20.9	48.7	39.1	36.2333	14.12		319.5	151.3	235.7	235.5	84.1002
MhpR	9.5	23.6	10.5	14.5333	7.86787		42.6	32.8	35.6	37	5.04777		281.9	246.8	216.7	248.467	32.6319
MiaA	114.1	100.2	120.5	111.6	10.3783		95	93.8	88.9	92.5667	3.23161		75.1	131.4	80.9	95.8	30.9666
MiaB	101	121.8	115.4	112.733	10.6533		94.3	94.1	91.7	93.3667	1.44684		87.3	102.1	92.2	93.8667	7.53945
MinC	118.7	115.4	113.3	115.8	2.72213		98.9	76.2	107.7	94.2667	16.2531		91.3	104.9	73.6	89.9333	15.6947
MinD	100.9	122.9	103.2	109	12.0926		99.2	99.3	81.3	93.2667	10.3636		90.1	103.7	99.3	97.7	6.93974
MinE	75.9	113.7	86	91.8667	19.571		88	99.2	119.9	102.367	16.184		160	80.6	76.7	105.767	47.0079
MioC	80.7	318.8	79.4	159.633	137.844		74.5	86.4	51.4	70.7667	17.7962		74.3	56	78.5	69.6	11.9637
MipA	59.2	118.9	83.4	87.1667	30.0277		126.7	109.3	77	104.333	25.2195		147.4	102.7	75.3	108.467	36.3943
MlaA	68.8	49.2	84.4	67.4667	17.6378		51.1	58.4	74	61.1667	11.698		209.9	170.1	134	171.333	37.965
MlaB	162.9	147.9	122.5	144.433	20.4219		64.7	44.8	104	71.1667	30.1251		46.2	100.9	106.1	84.4	33.1842
MlaC	112.5	143.1	139.6	131.733	16.7482		69.2	78.8	60	69.3333	9.40071		88	79.3	129.4	98.9	26.7696
MlaD	137	115.1	136	129.367	12.3654		76.4	72.3	86.4	78.3667	7.25282		77.8	86.7	112.3	92.2667	17.911
MlaE	132.7	83.5	136.2	117.467	29.468		118.1	73.5	75.6	89.0667	25.1655		148.1	77.7	54.7	93.5	48.6633
MlaF	145.3	129.6	118.9	131.267	13.2787		73.5	86.9	84	81.4667	7.05006		79.1	81.1	101.7	87.3	12.5108
Mlc	95.3	88.3	133.5	105.7	24.3286		109.6	117.9	90.5	106	14.0503		99.3	94.1	71.5	88.3	14.7797
MlrA	0	0	0	0	0		0	0	0	0	0		0	0	0	0	0
MltA	133.4	108.9	114.8	119.033	12.7868		70.6	99	102.1	90.5667	17.361		86.3	81.6	103.3	90.4	11.4162
MltB	85.1	99.4	82.1	88.8667	9.24464		93.2	109	109.6	103.933	9.30018		106.9	90.1	124.8	107.267	17.3529
MltC	87.5	78.7	71.5	79.2333	8.01332		106.6	129.5	93.9	110	18.0419		114.3	103	115	110.767	6.73523
MltD	0	0	0	0	0		0	0	0	0	0		0	0	0	0	0
MltG	121.5	74	121.4	105.633	27.3953		84.1	97.8	113.5	98.4667	14.7113		80	107.7	99.9	95.8667	14.2837
MmuM	71.2	161.4	92.2	108.267	47.1976		135.7	118.9	99.5	118.033	18.1156		0	68.7	152.4	73.7	76.3229
MnmA	122	74.5	113.6	103.367	25.3496		88.4	102.3	108.8	99.8333	10.4213		95.6	89.5	105.4	96.8333	8.02143
MnmC	93.1	84.9	79	85.6667	7.0812		90	96.3	103.9	96.7333	6.96012		121.1	96.9	134.7	117.567	19.1461
MnmE	107.9	116	97.2	107.033	9.42992		82.3	87.2	78.4	82.6333	4.40946		132.8	104.4	93.8	110.333	20.1656
MnmG	131.2	91.8	131.7	118.233	22.8933		109.8	85.4	108.1	101.1	13.6231		85	91	66	80.6667	13.0512
MntR	88.5	137.3	88.7	104.833	28.1171		90.4	90.5	98.2	93.0333	4.47474		86.2	101.3	119	102.167	16.4172
MoaA	133.2	38.3	144.6	105.367	58.3605		109.5	120.3	106.5	112.1	7.2581		110.8	123.7	12.9	82.4667	60.5908
MoaB	81.6	86.5	100.1	89.4	9.58488		94.6	108.4	86.4	96.4667	11.1182		119.8	123.2	99.4	114.133	12.8722
MoaC	96.4	96.1	86.2	92.9	5.80431		96.8	71.4	97.1	88.4333	14.7521		80.9	97.5	177.7	118.7	51.7652
MoaD	90	91.4	103.2	94.8667	7.25075		66	98.7	93.6	86.1	17.5929		127.7	113.9	115.5	119.033	7.54807
MoaE	110.4	97.6	95.7	101.233	7.99521		96.8	93.9	79.4	90.0333	9.3222		107.8	106.2	112.3	108.767	3.1628
MobA	83.7	83.9	98.1	88.5667	8.25671		102.3	60.4	116.3	93	29.0873		107.4	115.7	132.3	118.467	12.6785
MocA	55.9	0	206.4	87.4333	106.752		143.9	115.8	66.1	108.6	39.3966		162.5	121.5	27.8	103.933	69.0468
ModB	0	0	0	0	0		0	0	0	0	0		0	0	0	0	0
ModC	165.9	124.1	89.4	126.467	38.3049		75.7	115.5	51.4	80.8667	32.3608		79.7	53.4	144.9	92.6667	47.108
ModE	117.4	110.7	79.1	102.4	20.4546		103.2	84.4	100.7	96.1	10.2093		88.5	79.5	136.4	101.467	30.586
ModF	74	42.4	63.8	60.0667	16.1274		128	131.8	95.9	118.567	19.7216		123.6	113.4	127	121.333	7.07766
MoeA	100	146	101.9	115.967	26.027		101.5	96.4	102.5	100.133	3.27159		77.9	80.7	93.2	83.9333	8.14637
MoeB	121.4	99.5	117.4	112.767	11.662		130.6	107.8	85.5	107.967	22.5505		94.6	81.7	61.5	79.2667	16.6836
Mog	94.9	110.6	129	111.5	17.0678		82.4	138	87.9	102.767	30.6366		116.5	81.3	59.5	85.7667	28.7613
MotA	111.8	101.6	121.5	111.633	9.95105		94.5	92.4	83.5	90.1333	5.83981		114	112.4	68.2	98.2	25.9931
MotB	112.4	99	112.6	108	7.79487		89.4	94.4	89.7	91.1667	2.80416		109.5	119.6	73.5	100.867	24.2323
MpaA	79.9	92.9	78.8	83.8667	7.84241		106.4	140.2	120.8	122.467	16.9615		94	94.8	92.2	93.6667	1.33167
Mpl	102.3	141.6	105.5	116.467	21.8248		111.9	107.8	91.9	103.867	10.5642		83.3	78.3	77.5	79.7	3.14325
MppA	80.9	101.7	90.9	91.1667	10.4026		103.5	110.6	128.4	114.167	12.8274		103.8	84	96.2	94.6667	9.98866
MprA	145.9	51.2	154.6	117.233	57.3518		131.3	45.4	134.2	103.633	50.4524		102.5	87.1	47.8	79.1333	28.2068
Mqo	63.2	72.6	135.8	90.5333	39.4828		92.3	80.7	69.4	80.8	11.4503		118.4	141.1	126.6	128.7	11.4948
MqsA	127.1	116.2	111.6	118.3	7.96053		96.2	92.2	94.5	94.3	2.00749		99.7	70.1	92.5	87.4333	15.4368
MraY	79.7	145.5	105.7	110.3	33.1403		85	79	67.4	77.1333	8.94725		94	139.4	104.2	112.533	23.8196
MrcA	107.9	104.9	109.2	107.333	2.2053		94.9	106.3	96.4	99.2	6.19435		93	97.8	89.8	93.5333	4.02658
MrcB	86.7	135.9	123.6	115.4	25.6045		92.7	89.6	78.9	87.0667	7.2404		99.7	87.7	105.2	97.5333	8.94893
MrdA	136.6	110.4	125.4	124.133	13.1458		78.2	104.9	102.1	95.0667	14.6739		90.5	67	84.8	80.7667	12.2582
MrdB	135.5	120.2	138.3	131.333	9.74286		68.2	91.8	92.9	84.3	13.9539		102.2	78.4	72.4	84.3333	15.7611
MreB	112.3	126.5	103.1	113.967	11.7887		106.1	108.1	98.9	104.367	4.83873		85.8	83.6	75.6	81.6667	5.36781
MreC	112	115.9	113.4	113.767	1.97569		99.5	115.6	113.9	109.667	8.84553		76.6	81.4	71.6	76.5333	4.90034
Mrp	101.7	92.6	98.9	97.7333	4.66083		94.6	90	104.6	96.4	7.46458		102	107.7	107.8	105.833	3.32014
Mrr	84	122.1	102	102.7	19.0596		92.8	112.8	105.9	103.833	10.1589		73.7	114.4	92.5	93.5333	20.3697
MsbA	109.1	91.5	118.2	106.267	13.5736		102.6	121.9	97	107.167	13.0631		82.6	91.9	85.3	86.6	4.78435
MscK	112.1	111.5	110.7	111.433	0.702377		100.5	89.5	105.7	98.5667	8.27124		86.6	90.9	92.6	90.0333	3.09246
MscL	90.2	91.3	86.7	89.4	2.40208		82.6	97.6	69.9	83.3667	13.8659		144.9	141.4	95.4	127.233	27.624
MscM	127.6	103.7	106.9	112.733	12.9739		119.2	103.4	117.7	113.433	8.72143		67.8	83.5	70.2	73.8333	8.45715
MscS	72.5	92.6	81.1	82.0667	10.0848		68.9	67.1	71.7	69.2333	2.31805		126	142	178.1	148.7	26.6884
MsrA	116.8	79.7	133	109.833	27.3244		96.3	110.7	92.4	99.8	9.63898		99.6	94.4	77.1	90.3667	11.7798
MsrB	53.1	42.5	54.3	49.9667	6.4941		94.3	88.3	95.8	92.8	3.96863		177.3	148	146.5	157.267	17.3656
MsrC	89.2	56.3	78.3	74.6	16.7592		95.9	71.7	92.5	86.7	13.1011		166.4	138.6	111.2	138.733	27.6002
MsyB	144.2	101.9	109.2	118.433	22.6111		82.8	72.8	94	83.2	10.6057		127.2	75.6	92.2	98.3333	26.3411
MtfA	59.4	45.1	80.3	61.6	17.7028		98.2	115	142.2	118.467	22.2039		122	112	125.8	119.933	7.12835
MtlA	80.6	126	105.4	104	22.7324		106.5	116.4	107.9	110.267	5.35755		78.1	82.7	96.4	85.7333	9.51963
MtlD	77.1	107.6	86.3	90.3333	15.6449		121.8	107	102.5	110.433	10.0977		103.4	102.6	91.7	99.2333	6.53631
MtnN	116.1	85.4	110.2	103.9	16.2908		100.8	132.1	94.4	109.1	20.174		71.4	99.1	90.5	87	14.1778
Mtr	117	123.5	117.1	119.2	3.72424		110	98.3	83.6	97.3	13.2284		72.2	68.7	109.7	83.5333	22.7285
Mug	71.2	108.1	82.5	87.2667	18.9062		76.5	77.3	80.8	78.2	2.28692		112.6	114.9	176	134.5	35.9584
MukB	108.9	105.5	103.8	106.067	2.59679		91.7	97.6	105.6	98.3	6.97639		91	96	99.9	95.6333	4.46132
MukE	89.3	88.3	105	94.2	9.36643		88.9	100	87.6	92.1667	6.81493		107.7	101.8	131.3	113.6	15.6099
MukF	122.5	100.4	117.7	113.533	11.6243		108.9	102	96.1	102.333	6.40651		81.1	92	79.3	84.1333	6.87192
MurA	134.3	104.4	134.1	124.267	17.2053		108.4	71.5	63.3	81.0667	24.0238		99.6	75.9	108.5	94.6667	16.8506
MurB	100.1	130.9	109.2	113.4	15.8237		100.2	101.9	87.2	96.4333	8.04135		83.1	83.4	103.9	90.1333	11.9232
MurC	106.2	119.6	130.2	118.667	12.0272		105.9	87.2	111	101.367	12.5309		96.8	74.6	68.5	79.9667	14.8937
MurD	124.7	106.5	101.8	111	12.095		88	103.8	88.8	93.5333	8.90019		92.6	95	98.9	95.5	3.17962
MurE	107	88.1	114.9	103.333	13.7711		88	90.5	84.1	87.5333	3.22542		110.3	113.8	103.4	109.167	5.29182
MurF	89.7	153.5	91	111.4	36.4655		91.3	90.5	74.4	85.4	9.53467		126.7	88.8	94.1	103.2	20.5234
MurG	115.2	111.8	113.6	113.533	1.70098		94.7	100.1	104.8	99.8667	5.05404		78.9	92.1	88.7	86.5667	6.85371
MurI	130.5	64.3	113.5	102.767	34.3804		97.6	81.7	97	92.1	9.01166		106.4	119.8	89.1	105.1	15.3912
MurJ	111.5	160.7	116.5	129.567	27.0779		72.5	121.9	83.5	92.6333	25.9356		93.8	139.7	0	77.8333	71.2055
MurP	148.4	100.1	209.5	152.667	54.8247		51	122.8	153.5	109.1	52.6054		0	114.8	0	38.2667	66.2798
MurQ	103.3	91.7	120.4	105.133	14.4376		90.6	109.5	100.6	100.233	9.45533		74.2	86.7	123	94.6333	25.3488
MurR	121.4	115.3	116.2	117.633	3.29292		111.3	57.6	130.8	99.9	37.9082		74.6	73.2	99.6	82.4667	14.8544
MutH	0	0	0	0	0		0	0	0	0	0		0	0	0	0	0
MutL	143.3	68.9	83.7	98.6333	39.3839		71.7	170.7	114.9	119.1	49.6335		106.6	69.9	70.3	82.2667	21.0742
MutM	0	0	0	0	0		0	0	0	0	0		0	0	0	0	0
MutS	101.6	116.4	99	105.667	9.3858		96.4	98.4	97.5	97.4333	1.00167		94	87.2	109.6	96.9333	11.4845
MutT	115.8	106.7	116.3	112.933	5.40401		86.7	104.4	86.4	92.5	10.3068		104.2	92.8	86.9	94.6333	8.79451
MutY	117.5	157	104.2	126.233	27.462		100.6	85.1	104.3	96.6667	10.1864		62.7	71.5	97.1	77.1	17.8706
NadC	100.6	92.7	98.4	97.2333	4.07717		109.1	98.9	124.9	110.967	13.1001		93.5	94.9	86.9	91.7667	4.27239
NadE	85.9	82.4	88	85.4333	2.82902		109	118.1	93.5	106.867	12.438		103.5	120.1	99.6	107.733	10.8859
NadK	92.4	114.9	113.4	106.9	12.5797		82.4	103.1	104.6	96.7	12.4069		70.4	107.2	111.7	96.4333	22.6575
NadR	107.9	93.2	94.7	98.6	8.08888		113.1	109.6	89.5	104.067	12.7359		91.4	102.9	97.8	97.3667	5.76223
NagA	94.4	112.3	110.7	105.8	9.90505		105.9	122.8	80.4	103.033	21.3449		76.6	104	92.8	91.1333	13.7758
NagB	72.2	139.3	82.2	97.9	36.2004		115.2	109.4	87.8	104.133	14.4393		102.5	101.2	90.1	97.9333	6.81493
NagC	93.1	119.6	98.8	103.833	13.9486		111.4	99.5	97.7	102.867	7.44468		89.2	95.8	94.9	93.3	3.57911
NagD	102.2	79.8	106.3	96.1	14.2643		96.6	100.2	126.5	107.767	16.3231		100.6	91.2	96.5	96.1	4.71275
NagE	64.8	102.9	99.5	89.0667	21.0842		108.8	104.1	122.1	111.667	9.33613		105.6	104.3	88	99.3	9.80765
NagK	70.6	83.6	93.7	82.6333	11.5803		123.6	109.9	113.9	115.8	7.04486		121.6	88.4	94.6	101.533	17.6526
NagZ	114.3	74.5	122.3	103.7	25.6023		104.4	108.3	77	96.5667	17.0571		81.7	115	102.4	99.7	16.8134
NanA	145.6	151.6	182.2	159.8	19.6296		121	102.8	99.3	107.7	11.6503		8.4	7.8	81.3	32.5	42.2631
NanE	113.6	163.2	157.2	144.667	27.0713		108.1	142.9	103.1	118.033	21.6798		16.6	17.3	77.9	37.2667	35.1912
NanK	121.1	167.5	168.4	152.333	27.0526		114.3	90.9	105.5	103.567	11.8192		25.8	21.1	85.4	44.1	35.844
NanM	48.9	192.4	98.2	113.167	72.9113		102	134.4	79.5	105.3	27.5984		34	13	197.5	81.5	101.006
NanR	103.6	196.9	93.1	131.2	57.1396		100.5	107.7	81.5	96.5667	13.5356		68.9	73.9	73.8	72.2	2.85832
NanT	55.1	327	159	180.367	137.204		100.4	99.3	71.2	90.3	16.5502		12.6	7.4	68	29.3333	33.5871
NapA	172.1	127.1	184.8	161.333	30.3194		40	33	114.5	62.5	45.1691		53.3	74.4	100.8	76.1667	23.7992
NarK	0	0	0	0	0		0	0	0	0	0		0	0	0	0	0
NarL	203.8	207.4	268	226.4	36.0716		72.8	83.3	64.7	73.6	9.32577		0	0	0	0	0
NarP	135.9	97	133.9	122.267	21.9044		210.9	133	186.9	176.933	39.8949		2.3	0	0	0.766667	1.32791
Ndh	92.6	105.3	102	99.9667	6.58964		112	104	94.7	103.567	8.65814		104.1	103.7	81.6	96.4667	12.8765
Ndk	52.3	51.8	59.1	54.4	4.07799		96.4	86.9	97.7	93.6667	5.89604		144.3	148.1	163.6	152	10.224
Nei	78.9	113.9	112	101.6	19.6817		98.9	95.3	144	112.733	27.1375		97.7	83.9	75.3	85.6333	11.3001
NemA	93.3	89.8	118.1	100.4	15.4282		118.4	104.7	102.9	108.667	8.47722		110	83.1	79.7	90.9333	16.5995
Nfi	54.3	159.6	45.9	86.6	63.3592		79.4	75	52.3	68.9	14.5434		143	114.6	175.9	144.5	30.6775
Nfo	78.2	145.5	101.5	108.4	34.1765		71.1	86	80.3	79.1333	7.5182		91.3	111.5	134.5	112.433	21.6151
NfsA	84.9	114.9	92.7	97.5	15.5653		98.9	96.1	102.7	99.2333	3.3126		95.9	86.4	127.5	103.267	21.5175
NfsB	86.7	74.3	85.1	82.0333	6.74487		109.1	109.8	123.8	114.233	8.29237		105.9	104.2	101	103.7	2.48797
NfuA	105.2	95.8	110	103.667	7.22311		95.8	96.3	101.5	97.8667	3.15647		83.8	117.6	93.9	98.4333	17.35
NhaA	119.8	180.3	115.5	138.533	36.2348		96.5	101.5	96.3	98.1	2.94618		60	83	47.2	63.4	18.1406
NhaB	103.9	108.2	123.9	112	10.5276		73.2	68.6	75.5	72.4333	3.51331		148.4	112	86.3	115.567	31.2033
NhaR	145.2	282	140.4	189.2	80.403		70.7	81.8	0	50.8333	44.3714		0	94.4	85.5	59.9667	52.123
NikR	104.1	63.6	123.8	97.1667	30.6931		106.4	122.9	96.6	108.633	13.2915		102.3	102	78.2	94.1667	13.8284
NlpA	42.7	55.8	56.5	51.6667	7.77324		84.3	81.7	86.6	84.2	2.45153		155.2	170.2	167	164.133	7.90021
NlpC	0	900	0	300	519.615		0	0	0	0	0		0	0	0	0	0
NlpD	87.5	78.7	83	83.0667	4.40038		84.9	88.5	101.8	91.7333	8.90187		110.5	103.7	161.4	125.2	31.5339
NlpE	94.5	88.9	94.3	92.5667	3.177		79	101	104.5	94.8333	13.8233		115.1	113.9	108.8	112.6	3.34515
NlpI	67.8	28.3	56.2	50.7667	20.3028		115.2	137.1	118	123.433	11.9182		115.3	110.2	151.9	125.8	22.7466
NmpC	92.8	118.7	108.7	106.733	13.0615		65.9	71.8	158.7	98.8	51.9587		25.6	83.6	174.3	94.5	74.9468
Nnr	83.8	85.3	55.8	74.9667	16.6158		76.3	87.2	101.3	88.2667	12.5341		143.9	116.2	150.3	136.8	18.1248
NorR	150.8	167.6	159.2	159.2	8.4		140.7	126.2	0	88.9667	77.3877		0	0	155.5	51.8333	89.778
NrdA	118.9	121.3	101.8	114	10.6334		99.8	91.5	110	100.433	9.26625		86.4	85.3	85.1	85.6	0.7
NrdB	114.2	98.2	113	108.467	8.91142		105.8	111.1	98	104.967	6.58964		81.5	84.1	94.2	86.6	6.70895
NrdD	70.3	90.1	83.6	81.3333	10.0927		102.2	149.4	125.1	125.567	23.6035		84.8	89.8	104.6	93.0667	10.2963
NrdR	103	129.8	79	103.933	25.4129		105.4	123.7	106	111.7	10.3966		69.7	90.7	92.7	84.3667	12.741
NrfD	0	0	0	0	0		0	0	0	0	0		0	0	0	0	0
NsrR	110.9	69.3	109.6	96.6	23.6514		113.3	72.1	64.7	83.3667	26.1857		71.9	120.1	168.2	120.067	48.15
Nth	118.3	94.6	128.6	113.833	17.4345		114	107.7	78.3	100	19.0549		90.4	105.3	62.7	86.1333	21.6181
NudC	97.8	128.8	110.7	112.433	15.5725		45.9	57.8	103.4	69.0333	30.3513		143.8	97.1	114.8	118.567	23.5768
NudE	69.6	93.2	74.8	79.2	12.4		80	94.5	86.7	87.0667	7.25695		145.1	131.2	124.8	133.7	10.3783
NudF	87.8	109.5	79.3	92.2	15.5734		102.1	118.4	95.7	105.4	11.7043		98.3	101.1	107.8	102.4	4.8816
NudG	61.2	101.7	58.9	73.9333	24.0741		129.6	133.6	134.9	132.7	2.76225		107.7	57.7	114.7	93.3667	31.0859
NudI	336.2	48.5	169.4	184.7	144.459		205.2	0	116.2	107.133	102.9		0	0	24.6	8.2	14.2028
NudJ	109.9	91.6	77.8	93.1	16.1025		77.6	109.6	93.4	93.5333	16.0004		127.6	99.6	112.9	113.367	14.0058
NudK	130.6	66.1	110.5	102.4	33.0041		102.7	125.3	67.5	98.5	29.128		95	66.9	135.5	99.1333	34.4863
NuoA	86.5	82.5	93.7	87.5667	5.67568		106.2	90.1	146.7	114.333	29.1634		102.6	93.4	98.4	98.1333	4.60579
NuoB	78.7	106.3	92.5	92.5	13.8		102.5	81.3	101.4	95.0667	11.935		91.5	111	134.8	112.433	21.6856
NuoC	72.2	89.5	85.5	82.4	9.05704		104.4	114.3	104.9	107.867	5.57704		98.2	98.7	132.4	109.767	19.6026
NuoE	76.4	77.8	87.6	80.6	6.10246		112.7	104	99	105.233	6.93277		84.2	97.4	161	114.2	41.0639
NuoF	70.3	98.7	78.5	82.5	14.6164		103.4	101.4	92.7	99.1667	5.68888		101	91.3	162.7	118.333	38.7276
NuoG	75	78.2	77.3	76.8333	1.65025		92.1	113.3	104.9	103.433	10.6758		103	98.8	157.4	119.733	32.6878
NuoH	54.3	139.8	66.5	86.8667	46.2457		78.1	98.8	86.9	87.9333	10.3886		100.6	115.3	159.8	125.233	30.8247
NuoI	77.9	69.6	81.6	76.3667	6.14519		92.8	96.1	127.3	105.4	19.0376		107	107.2	140.7	118.3	19.3992
NuoK	68.7	113.3	68.9	83.6333	25.6923		101.2	148.9	115.6	121.9	24.4661		79.9	74.3	129.2	94.4667	30.21
NuoL	61.1	88.3	78.4	75.9333	13.7667		107.9	107.4	89.7	101.667	10.3665		114.4	112	140.9	122.433	16.0376
NuoM	62.2	195.1	141.6	132.967	66.8693		77.9	58.3	48.9	61.7	14.7959		105.6	121.9	88.5	105.333	16.7016
NuoN	67.5	106.3	98.4	90.7333	20.5047		35.8	115.2	69.9	73.6333	39.8314		80.4	155.5	170.9	135.6	48.4208
NupC	106.2	74.7	103.3	94.7333	17.4099		106.9	85.8	182.8	125.167	51.0147		86.7	85.1	68.5	80.1	10.0777
NusA	123.3	88.2	115	108.833	18.3446		105.6	102.4	95.6	101.2	5.10686		83.3	96.1	90.5	89.9667	6.41665
NusB	105.9	147	102.3	118.4	24.8336		86.1	106.2	84.4	92.2333	12.1253		102.2	85.6	80.4	89.4	11.386
NusG	86.9	114.1	105.6	102.2	13.9151		110.6	152.7	76.6	113.3	38.1218		89.1	81.1	83.3	84.5	4.1328
ObgE	131.1	118	115.5	121.533	8.37874		95.3	92	85.1	90.8	5.20481		89	97.4	76.7	87.7	10.4111
OmpA	92.4	97.7	109.6	99.9	8.80852		107.8	133.8	109.4	117	14.5712		81.1	84.2	84	83.1	1.73494
OmpC	262.3	265.9	285	271.067	12.2001		16.8	20.6	21	19.4667	2.31805		9.9	7.3	11.1	9.43333	1.94251
OmpF	208	259.9	317.2	261.7	54.6222		32	26.3	35.8	31.3667	4.78156		2.9	9.1	8.8	6.93333	3.49619
OmpR	159.6	151.9	163.8	158.433	6.03517		157.9	157.7	109.2	141.6	28.0594		0	0	0	0	0
OmpT	237.6	282.8	371.8	297.4	68.2809		7.8	0	0	2.6	4.50333		0	0	0	0	0
OpgE	76.3	89.7	111.5	92.5	17.7663		94.6	123.5	94.4	104.167	16.7435		84.5	110.1	115.5	103.367	16.5606
OppA	32.5	30.9	23.8	29.0667	4.63069		76.8	85.2	70.9	77.6333	7.18633		192.1	183.9	203.8	193.267	10.0012
OppB	28.6	21.3	18.2	22.7	5.33948		85.9	71	76.4	77.7667	7.54343		242.8	156.9	198.9	199.533	42.9535
OppC	19.4	26.3	0	15.2333	13.6361		72.3	86.9	66.4	75.2	10.5532		192.2	199.1	237.5	209.6	24.4072
OppD	17.8	9.8	29.4	19	9.85495		82.3	84.1	84.9	83.7667	1.33167		187.1	204.8	199.9	197.267	9.13911
OppF	29.9	15.9	26.7	24.1667	7.33576		75.4	90.4	84.9	83.5667	7.58837		185	202	189.8	192.267	8.76432
Orn	105.2	109.1	116.1	110.133	5.52298		81.7	93.4	109.2	94.7667	13.8008		112.9	87.7	84.8	95.1333	15.4546
OsmB	252.7	205.4	128.7	195.6	62.5782		46.3	129.9	63.6	79.9333	44.1285		27.3	26.8	19.5	24.5333	4.36616
OsmC	121.9	110.8	158.6	130.433	25.0165		106.4	83	83.5	90.9667	13.368		85.7	92.1	58	78.6	18.1248
OsmE	86.3	97	98.4	93.9	6.61891		95.7	87.3	85.4	89.4667	5.48118		140.8	126.5	82.6	116.633	30.3286
OsmY	132.6	116.6	116.6	121.933	9.2376		55	53.4	66.9	58.4333	7.37586		150.7	118.7	89.5	119.633	30.6107
OtsA	93.8	60.9	57.5	70.7333	20.0485		69.5	65.1	73.3	69.3	4.10366		215.7	107.4	156.7	159.933	54.2224
OtsB	66.8	25.9	30.4	41.0333	22.4277		0	31.6	29.2	20.2667	17.5924		0	0	716	238.667	413.383
OxyR	102.6	98.6	113.7	104.967	7.82326		113	105.7	91.5	103.4	10.933		79.1	97.7	98.3	91.7	10.916
PaaK	28.3	48.7	24.8	33.9333	12.9075		107.2	28.5	39.9	58.5333	42.5303		196.4	202.2	223.9	207.5	14.4959
PaaX	69.6	47.3	57	57.9667	11.1814		93.7	80.9	115.7	96.7667	17.6015		190.6	110.6	134.7	145.3	41.0399
PabA	77.3	96	82.4	85.2333	9.66661		163.3	140.7	92.8	132.267	35.9987		89.3	55	103.3	82.5333	24.8508
PabB	87.8	100.1	93.4	93.7667	6.15819		54.5	97.1	69.3	73.6333	21.6281		153.8	123.2	120.8	132.6	18.3989
PabC	0	0	456.8	152.267	263.734		0	0	0	0	0		0	443.2	0	147.733	255.882
Pal	52.9	50	64.6	55.8333	7.72938		84.8	80.7	118.8	94.7667	20.9142		168.1	162.7	117.5	149.433	27.7866
PanB	60.5	41.6	64.5	55.5333	12.2312		91.6	164.6	136.8	131	36.844		91.2	153.9	95.3	113.467	35.0763
PanC	83.3	102.6	83.8	89.9	11.0014		109.1	103.2	108.1	106.8	3.15753		114.6	90.8	104.6	103.333	11.9505
PanE	143.8	115.6	82.2	113.867	30.8366		128.1	128.5	69.5	108.7	33.9488		86.9	66.6	78.8	77.4333	10.2188
PanF	129.2	107.6	199.7	145.5	48.165		47.2	125	74.6	82.2667	39.4626		48.6	91.8	76.4	72.2667	21.8946
PanZ	106.4	134.5	105.9	115.6	16.3698		91.1	93.3	82	88.8	5.99083		102.7	84.5	99.7	95.6333	9.75773
ParC	105.6	117	107.4	110	6.12862		103.8	104.7	106.2	104.9	1.21244		73.4	82.6	99.4	85.1333	13.1838
ParE	114.4	107.1	105.3	108.933	4.81906		97.4	85.7	91.6	91.5667	5.85007		97.9	99.9	100.7	99.5	1.44222
PatA	0	0	0	0	0		130.4	108.6	58.6	99.2	36.8114		157.3	183.3	261.8	200.8	54.4036
PatD	186.8	45.1	75.5	102.467	74.5998		81.7	78	73.4	77.7	4.15812		124.5	119.2	115.9	119.867	4.33859
PatZ	98.2	88	81.5	89.2333	8.41804		112.3	70.6	120.2	101.033	26.6504		108.1	96.2	124.9	109.733	14.4195
PbpG	105.3	140	123.6	122.967	17.3587		84	99.1	108.7	97.2667	12.4516		87.3	73.8	78.3	79.8	6.87386
PckA	86.7	111.3	98.6	98.8667	12.3022		100.3	106.7	104.7	103.9	3.27414		96.1	93.4	102.2	97.2333	4.50814
Pcm	90.1	45.8	86.4	74.1	24.5782		90.4	65.5	124.2	93.3667	29.4622		108.3	121.8	167.6	132.567	31.0816
PcnB	99.7	111	90.6	100.433	10.2198		94.9	93.8	95.1	94.6	0.7		93.8	114.8	106.2	104.933	10.5571
PdeA	103.5	133.3	29.8	88.8667	53.2791		78.1	73.9	112	88	20.8904		67.7	80	221.8	123.167	85.6401
PdeH	139.8	110	104.5	118.1	18.9929		81.1	75.4	78.6	78.3667	2.85715		122.1	106.1	82.4	103.533	19.9741
PdeK	132.7	111.1	107.7	117.167	13.5593		90.7	106	85.4	94.0333	10.6969		81.8	101.2	83.4	88.8	10.7685
PdhR	101.4	111.5	90.4	101.1	10.5532		108.7	96.3	72.8	92.6	18.2338		98.4	117.5	102.9	106.267	9.98516
PdxA	125.7	105.4	105.5	112.2	11.6914		113.1	115.3	86.3	104.9	16.1456		71.7	79.6	97.4	82.9	13.164
PdxB	101.4	117.3	102.6	107.1	8.85381		95.2	105.5	84.3	95	10.6014		97.3	86.3	110.1	97.9	11.9113
PdxH	95.5	72.2	114	93.9	20.9459		102.1	105.6	105.5	104.4	1.99249		117	106.1	82	101.7	17.9101
PdxI	64.1	68.1	77.5	69.9	6.87895		75.7	82.4	77.5	78.5333	3.46747		183.6	127.8	143.1	151.5	28.8328
PdxJ	96.2	165.2	89.5	116.967	41.9054		84.8	86.6	97.3	89.5667	6.75747		79.9	77	123.5	93.4667	26.05
PdxK	88.3	108.9	114.3	103.833	13.7205		70.5	103.8	70.6	81.6333	19.197		102.2	115.4	126.2	114.6	12.02
PdxY	110	150.4	133.9	131.433	20.3126		98.7	95.6	79	91.1	10.5929		86.8	85	60.6	77.4667	14.6347
PepA	91.2	110.8	97	99.6667	10.0684		101.3	100.2	86.1	95.8667	8.47604		101.2	105.9	106.3	104.467	2.83608
PepB	139.7	112.3	156.7	136.233	22.4021		87.6	91.5	75.5	84.8667	8.34286		70.7	86	80	78.9	7.70909
PepD	99	113.5	90.8	101.1	11.4948		93.4	105.9	118.6	105.967	12.6001		97.8	101.8	79.2	92.9333	12.0604
PepE	96.5	76.6	84.9	86	9.9955		111.2	141.7	122.5	125.133	15.4196		106.6	77.7	82.2	88.8333	15.55
PepN	74	78.5	76	76.1667	2.25462		92.2	101	92.5	95.2333	4.99633		135.9	114.3	135.7	128.633	12.4134
PepP	105.4	77.4	112.4	98.4	18.5203		101.3	110.1	113.3	108.233	6.21396		102	81.2	96.9	93.3667	10.8408
PepQ	69.7	88.1	87.2	81.6667	10.3732		100.5	101.4	106.1	102.667	3.00721		114.8	112.7	119.6	115.7	3.53695
PepT	73	68	77	72.6667	4.50925		102	93.6	87.8	94.4667	7.13956		146.8	110.5	141.3	132.867	19.5643
PfkA	73.7	69.1	80.6	74.4667	5.78821		92.4	100.9	98.1	97.1333	4.33167		150.7	136	98.6	128.433	26.8616
PfkB	112	94.7	109.7	105.467	9.39486		109.7	91.7	95.6	99	9.46942		93.4	82.7	110.5	95.5333	14.0222
PflA	107.9	84.2	106.3	99.4667	13.2455		99.8	95.5	95.6	96.9667	2.45425		91.3	124.4	94.9	103.533	18.1605
PflB	109.9	94.4	100	101.433	7.84878		102.9	92.6	90.4	95.3	6.67308		119.4	102.2	88.2	103.267	15.6273
PflD	38.5	164.7	110.8	104.667	63.3232		112.9	133.6	97	114.5	18.3524		115.3	14	113.1	80.8	57.861
Pgi	76.9	76.6	80.2	77.9	1.9975		98.3	97.5	106.4	100.733	4.92375		143.8	121.9	98.6	121.433	22.6036
Pgk	82	77.3	72.3	77.2	4.85077		91	105	106.4	100.8	8.51587		124.1	110.4	131.5	122	10.7056
Pgl	107.4	88	81.8	92.4	13.3551		99.4	82.2	122.8	101.467	20.3787		119	85.4	114	106.133	18.1288
Pgm	107.4	114.4	116.2	112.667	4.64901		99.3	105.5	94.5	99.7667	5.51483		86.8	85.7	90.2	87.5667	2.34592
PgpC	154.4	89	216.6	153.333	63.8067		75.8	18.9	67.3	54	30.6932		114.6	88.5	74.9	92.6667	20.1753
PgsA	60.7	156.4	77	98.0333	51.1998		108.7	120.9	99.9	109.833	10.5458		113	81.1	82.2	92.1	18.1083
PheA	65.6	79.4	82.9	75.9667	9.14677		93.5	95.5	101.9	96.9667	4.38786		105.8	147.2	128.1	127.033	20.7206
PheP	132	98.8	87.9	106.233	22.9705		84.2	94	135.8	104.667	27.4039		78.7	82.3	106.3	89.1	15.004
PheS	90.8	96.6	91.7	93.0333	3.12143		112.4	100.4	111.5	108.1	6.68356		104.9	101.6	90.2	98.9	7.71298
PheT	91.2	108.7	92.7	97.5333	9.69966		106.2	98.9	94.5	99.8667	5.9096		107.8	117	83	102.6	17.5864
PhoA	0	0	0	0	0		0	0	0	0	0		0	0	0	0	0
PhoB	149.4	195.3	132.5	159.067	32.4968		121.8	161.8	139.1	140.9	20.0607		0	0	0	0	0
PhoH	0	0	0	0	0		214.7	228.8	0	147.833	128.221		162.9	75.8	217.8	152.167	71.6059
PhoP	216	175.4	219.1	203.5	24.3846		87.1	103.6	85.1	91.9333	10.153		7.9	5.7	0	4.53333	4.07717
PhoQ	581.1	178.8	140.1	300	244.208		0	0	0	0	0		0	0	0	0	0
PhoU	159.4	184.6	175.2	173.067	12.7347		85.8	116.6	79.7	94.0333	19.7799		27	32.9	38.8	32.9	5.9
Php	94.7	107.7	77.2	93.2	15.3052		104.3	0	107	70.4333	61.012		186.6	93.5	129	136.367	46.9851
PhrB	67.9	75.6	47	63.5	14.799		93.7	72.4	73.1	79.7333	12.1006		190	121.8	158.5	156.767	34.133
PitA	121.4	135.5	107.2	121.367	14.15		94.3	120.7	127.9	114.3	17.6907		68.6	60.3	64	64.3	4.15812
PlaP	150.7	104.1	147.2	134	25.9532		107.1	107.5	97.6	104.067	5.60387		83	74.7	28.2	61.9667	29.5358
PliG	84.1	81.7	73.9	79.9	5.33292		108	106.4	104.6	106.333	1.70098		102.6	99.1	139.6	113.767	22.4407
PlsB	95.2	92.2	98.8	95.4	3.30454		108.2	93.7	93	98.3	8.58079		115.4	101.7	101.7	106.267	7.9097
PlsC	114.9	102	107.8	108.233	6.46091		98.9	78.7	81.7	86.4333	10.9002		113.8	95.6	106.6	105.333	9.16588
PlsX	104.7	73.4	70.5	82.8667	18.9637		71.7	142.3	90.2	101.4	36.6083		113.2	109.9	124.1	115.733	7.43124
PmbA	95.9	92.8	106.3	98.3333	7.0713		101.7	90	109.2	100.3	9.67626		101.8	105.5	96.7	101.333	4.41852
PmrD	211	182.2	194	195.733	14.478		39.3	94.7	75.5	69.8333	28.1314		40.3	27.9	35.1	34.4333	6.22682
PncA	101.9	64.8	91.4	86.0333	19.1234		74.5	134	116.9	108.467	30.6334		116.3	110.1	90.2	105.533	13.6361
PncB	110.7	120.4	98.1	109.733	11.1814		101.4	105.9	91.9	99.7333	7.14726		112.5	76.6	82.6	90.5667	19.2303
PncC	85.6	74	73.6	77.7333	6.81567		94.8	115	110.6	106.8	10.6226		86.3	112.6	147.6	115.5	30.7527
Pnp	110.9	110.5	96.2	105.867	8.37397		103.5	104.1	97.1	101.567	3.87986		87.2	96.4	94.2	92.6	4.80416
PntA	93.3	106.2	92.7	97.4	7.62693		109.6	115.7	96	107.1	10.0851		108.3	91.9	86.3	95.5	11.4333
PntB	94.6	117.1	95.3	102.333	12.7931		97.7	118.8	87.5	101.333	15.9632		88.6	100.8	99.5	96.3	6.7
PolA	104.3	98.7	116.8	106.6	9.26661		104.8	98.3	113	105.367	7.36637		86	102.3	75.7	88	13.4123
PotA	119.1	100.2	107.4	108.9	9.53887		90.1	91.4	118.4	99.9667	15.977		106.5	84.1	82.7	91.1	13.3551
PotB	108.6	61.6	186.6	118.933	63.1374		106.3	102.8	88.4	99.1667	9.48701		64.1	117	64.6	81.9	30.3985
PotC	179.9	129.2	139.2	149.433	26.8545		32.4	76.9	68.2	59.1667	23.5852		82	41.6	150.6	91.4	55.1046
PotD	63.4	85.7	139.8	96.3	39.2875		96.6	80.8	70	82.4667	13.3781		110.3	123.7	129.7	121.233	9.93244
PotE	27.2	169.3	108	101.5	71.2726		30.5	120.1	96.1	82.2333	46.3816		128.7	32.1	187.9	116.233	78.6446
PotF	10.3	9	8.3	9.2	1.01489		97.7	84.5	97.4	93.2	7.53591		204.7	176.5	211.6	197.6	18.596
PotG	0	0	0	0	0		122.9	119.7	103.1	115.233	10.6289		178.6	214.9	160.9	184.8	27.5287
PoxB	96.3	90.9	109.5	98.9	9.5687		75.3	72.9	75.3	74.5	1.38564		144.7	125.2	109.9	126.6	17.4422
Ppa	61.7	68.7	116.7	82.3667	29.9388		95.9	87.8	82.6	88.7667	6.70249		105.9	161.1	119.6	128.867	28.7431
Ppc	75.4	57.9	75.3	69.5333	10.0749		114.7	94.3	106.1	105.033	10.2417		125.9	131.5	119	125.467	6.26126
PpdC	0	0	0	0	0		0	0	0	0	0		0	0	0	0	0
PpiA	95.5	135	115.1	115.2	19.7502		123.9	137.4	136.4	132.567	7.52219		59.3	46	51.4	52.2333	6.68905
PpiB	93.4	81	111.4	95.2667	15.2857		82.9	82.8	134.3	100	29.7047		117.4	117.2	79.7	104.767	21.7086
PpiC	97.6	54.4	103.6	85.2	26.8418		110.3	140.6	136.4	129.1	16.4162		115.7	95.3	45.9	85.6333	35.89
PpiD	113.5	107.7	102.6	107.933	5.45374		104.6	100.8	97.8	101.067	3.40783		79.9	97	96.2	91.0333	9.65004
Ppk	90	107.4	91.8	96.4	9.5687		89	79.3	121.5	96.6	22.1027		92.6	105.3	123.2	107.033	15.3735
PpnN	82.5	124	100.1	102.2	20.8295		101.2	105.1	96	100.767	4.56545		96.1	86.9	108.3	97.1	10.735
PpnP	101.3	82.9	124.3	102.833	20.7425		121.9	72.3	112.8	102.333	26.4046		99.1	89	96.5	94.8667	5.24436
PpsA	101	102.5	99.7	101.067	1.40119		106.8	111.3	113.9	110.667	3.59212		79.5	72.6	112.7	88.2667	21.4393
PpsR	73.7	48.1	115.2	79	33.8625		114	109.7	93.5	105.733	10.8103		136.8	120.2	88.9	115.3	24.323
Ppx	94.6	79.9	95.9	90.1333	8.88613		105.6	98.1	99.3	101	4.02865		98.4	103.1	125.1	108.867	14.2535
PqiB	122.8	65.2	100.5	96.1667	29.0435		97.9	87.4	101.7	95.6667	7.40698		103.7	105.6	115.1	108.133	6.10765
PqiC	100.4	132.1	94.7	109.067	20.15		98.1	68.7	97.7	88.1667	16.8598		121.4	100.9	86.1	102.8	17.7265
PqqL	64.8	67.2	103.9	78.6333	21.9145		66.2	0	38.8	35	33.2632		117.7	97.8	343.7	186.4	136.589
Prc	98.3	93.9	95.3	95.8333	2.24796		98.7	110.6	101.1	103.467	6.29312		113.4	107.6	81.2	100.733	17.1631
PrfA	101.9	101.7	128	110.533	15.1269		82.7	92	110.9	95.2	14.3698		89.1	92.7	101.1	94.3	6.15792
PrfB	103.3	108.1	109.3	106.9	3.1749		99.8	91.8	89.5	93.7	5.40648		90.8	84.1	123.4	99.4333	21.0244
PrfC	111.6	93.9	97	100.833	9.45216		100	109.2	97.5	102.233	6.16144		98.1	107.6	85	96.9	11.3477
PriA	66.1	87.2	59.9	71.0667	14.3117		103	94.5	65.8	87.7667	19.4926		111.8	130	181.8	141.2	36.3191
PriB	131	92.9	112.1	112	19.0502		103.5	121.4	69.1	98	26.5803		75.3	115.4	79.3	90	22.0878
PrkB	102.1	117.7	123.7	114.5	11.1499		80.6	105.3	115.9	100.6	18.1133		75.6	102.2	77	84.9333	14.9697
PrlC	100.2	80.9	96	92.3667	10.15		101.8	90.5	98.1	96.8	5.76108		127.1	103.6	101.9	110.867	14.0842
PrlF	81	76.7	116.7	91.4667	21.9582		102.1	92.1	105.2	99.8	6.84617		66.9	105.5	153.7	108.7	43.4884
PrmA	127.3	112.4	120.2	119.967	7.45274		124.6	104.8	91.9	107.1	16.4709		74.3	102.9	41.6	72.9333	30.6728
PrmB	88.4	110.5	103.8	100.9	11.3318		92.4	108.7	109.6	103.567	9.68108		66.7	82.3	137.6	95.5333	37.2565
ProA	97.9	123.1	98	106.333	14.5204		93.8	105.2	91.9	96.9667	7.19328		99.3	103	87.8	96.7	7.92654
ProB	114.2	96.1	107.9	106.067	9.18822		106.8	105.2	97.7	103.233	4.85833		91.1	110.3	70.7	90.7	19.803
ProC	93.3	71.7	106.2	90.4	17.4319		96.8	111.8	76.7	95.1	17.6116		112.5	122	109	114.5	6.72681
ProP	168.5	142.2	87.2	132.633	41.4857		32.1	47.6	62.7	47.4667	15.3004		124.9	137.2	97.5	119.867	20.323
ProQ	109.4	115.6	130.8	118.6	11.0109		99.7	86.6	92	92.7667	6.58357		92.1	93.3	80.6	88.6667	7.01166
ProS	103.3	104.7	98.4	102.133	3.30807		101.9	105.2	103	103.367	1.68028		95.3	97.3	90.8	94.4667	3.32916
ProV	90.5	67.8	60.6	72.9667	15.6052		144.3	77.3	150.2	123.933	40.4933		86.7	148.9	73.7	103.1	40.193
ProW	0	0	0	0	0		0	0	0	0	0		0	0	0	0	0
ProX	99.2	87.2	88.5	91.6333	6.58508		123.1	122	95.8	113.633	15.4539		86	92.5	105.7	94.7333	10.0381
ProY	0	0	0	0	0		0	0	0	0	0		0	0	0	0	0
PrpB	252.7	45	254.8	184.167	120.526		166.5	181	0	115.833	100.576		0	0	0	0	0
PrpC	213.7	156.1	182.4	184.067	28.8361		122.7	142.4	82.7	115.933	30.4198		0	0	0	0	0
PrpD	205.4	113.6	133.9	150.967	48.221		116.2	136.6	102.6	118.467	17.113		0	60.6	31.1	30.5667	30.3035
Prs	111.2	109.4	118.4	113	4.76235		93.5	94.9	85.3	91.2333	5.18588		102	91.4	93.8	95.7333	5.55818
Psd	102.8	90.7	109.6	101.033	9.57305		109.1	121.1	122.7	117.633	7.43326		81.6	75.9	86.5	81.3333	5.30503
PsiF	141.5	107.6	125.3	124.8	16.9555		64.3	67	173.5	101.6	62.2819		92.7	89	39	73.5667	29.9927
PspA	50.6	52.3	52.5	51.8	1.04403		76.8	81.1	66.1	74.6667	7.7242		187.2	232.9	100.6	173.567	67.1954
PspB	96.9	65.1	68.8	76.9333	17.3903		78.3	64.3	156.2	99.6	49.5143		124.6	175	71	123.533	52.0082
PspC	66.2	60.1	31.7	52.6667	18.412		52	46.5	52.4	50.3	3.29697		127.1	363.7	100.3	197.033	144.958
PspE	54.1	65.2	83.5	67.6	14.8462		111.9	144.7	165.1	140.567	26.8398		93.2	92.6	89.7	91.8333	1.87172
PspF	85.4	121	79.4	95.2667	22.4867		115.9	160.2	96.6	124.233	32.6086		66.1	80.5	94.9	80.5	14.4
PssA	99.4	75.2	86.9	87.1667	12.1022		104.2	68.5	104.5	92.4	20.6986		115.3	103.1	142.8	120.4	20.3354
PstB	182.6	180.3	208.1	190.333	15.4293		85.5	87.5	99.8	90.9333	7.7436		17.6	21.9	16.7	18.7333	2.77909
PstS	148.3	142.9	149.4	146.867	3.47898		161.2	158.3	132.8	150.767	15.627		3	0.3	3.8	2.36667	1.83394
Pta	136.4	113.1	122.8	124.1	11.7043		107.3	104.4	109	106.9	2.32594		63.4	63.7	79.9	69	9.44087
Pth	132.8	91	119.3	114.367	21.3322		113.5	53.2	97.2	87.9667	31.1924		100.8	114.1	78.1	97.6667	18.2034
PtrA	117.6	146.1	113.7	125.8	17.6881		102.4	94.9	75.9	91.0667	13.6596		75.1	88.9	85.5	83.1667	7.18981
PtrB	72.6	80.3	91.9	81.6	9.71545		72.4	72	137.2	93.8667	37.5283		123.8	143.2	106.5	124.5	18.36
PtsA	131.3	132	99.3	120.867	18.6806		138.2	85.4	146.8	123.467	33.246		99.3	67.7	0	55.6667	50.7319
PtsG	85.3	80.5	76.4	80.7333	4.45459		92.8	106.4	87.5	95.5667	9.74902		139.3	137.3	94.5	123.7	25.3077
PtsH	61.2	63.3	62.9	62.4667	1.11505		102.4	131.3	86.5	106.733	22.7122		159.7	84.3	148.4	130.8	40.6646
PtsI	72	70.1	71.8	71.3	1.04403		94.1	83.1	91.8	89.6667	5.80201		125	149.8	142.1	138.967	12.6934
PtsN	112.1	97.3	101.7	103.7	7.6		96.8	65.3	95	85.7	17.6898		78.7	96.8	156.3	110.6	40.5989
PtsP	94.2	92.3	101.8	96.1	5.02693		105.1	106.9	100.1	104.033	3.52326		86.7	100.1	112.8	99.8667	13.0516
PurA	98.7	132	98.2	109.633	19.3717		91.7	96.3	95.3	94.4333	2.41937		101.8	101	85.1	95.9667	9.41931
PurB	110.3	110.1	91.6	104	10.7392		87.3	101.2	110.8	99.7667	11.8154		102.5	96.6	89.6	96.2333	6.45781
PurC	84.6	107	110.7	100.767	14.1224		95.6	99.5	91.3	95.4667	4.10163		82.9	87.9	140.6	103.8	31.9676
PurD	76.8	134.2	83.1	98.0333	31.4793		87.6	81.5	92.9	87.3333	5.70468		86.2	79.7	178	114.633	54.9733
PurE	127	92.5	82.8	100.767	23.2307		87.3	115.1	66.2	89.5333	24.5264		76.4	78	174.7	109.7	56.2973
PurF	97.5	82.8	92.2	90.8333	7.44468		96.4	60.7	99.9	85.6667	21.6925		63	114.7	192.7	123.467	65.2929
PurH	101.2	94.7	96.6	97.5	3.34215		90.4	97.6	109.4	99.1333	9.59236		106.2	88.7	115.1	103.333	13.4314
PurK	102.4	73.8	131.6	102.6	28.9005		51.7	136.2	79.2	89.0333	43.0997		67.2	21.7	236.3	108.4	113.077
PurL	106.5	65.8	88.3	86.8667	20.3878		83	95.5	105.1	94.5333	11.0817		100.1	90.7	164.9	118.567	40.4002
PurM	154.4	95.2	123.7	124.433	29.6068		119.6	111.3	98.7	109.867	10.5235		54.5	56.3	86.2	65.6667	17.8051
PurN	109.9	133.5	98.9	114.1	17.6782		101.8	90.3	85.2	92.4333	8.50314		82.9	89.4	108.1	93.4667	13.0829
PurR	113.5	102.6	120	112.033	8.79223		96.5	94.5	105.6	98.8667	5.91636		81.8	97.7	87.7	89.0667	8.03762
PurT	116.7	35.7	58	70.1333	41.8409		166.5	158.3	199.5	174.767	21.8086		75.9	54.9	34.4	55.0667	20.7505
PurU	66.7	49.8	66.8	61.1	9.78621		100.9	126.2	89	105.367	18.998		150.3	143.5	106.7	133.5	23.4572
PutA	15.7	26.1	20.4	20.7333	5.20801		47	83.8	68.9	66.5667	18.5106		194	186.1	258	212.7	39.4293
PutP	49.4	57.1	62.2	56.2333	6.44386		61.5	84.7	94.3	80.1667	16.8634		155.3	170.3	165.3	163.633	7.63763
PuuA	4.5	35.4	27	22.3	15.9772		38.8	43.5	50.4	44.2333	5.83467		196.2	218	286.1	233.433	46.895
PuuB	0	0	0	0	0		78	85	81.7	81.5667	3.5019		222.1	285.3	147.9	218.433	68.7733
PuuC	0	0	0	0	0		52.1	43.6	47.3	47.6667	4.26185		299.9	201.5	255.7	252.367	49.2846
PuuD	4.4	27.3	8	13.2333	12.3144		6.1	6.5	3.8	5.46667	1.45717		373.7	217.8	252.6	281.367	81.8342
PuuE	0	0	0	0	0		0	0	18.7	6.23333	10.7965		691.3	84.8	105.2	293.767	344.425
PuuR	51	41.5	25.3	39.2667	12.9947		109.3	168.6	32.4	103.433	68.2893		225.4	148.6	97.8	157.267	64.24
PxpA	143.2	84	33.6	86.9333	54.8588		134.3	224.3	71	143.2	77.0365		65.3	72.4	72	69.9	3.98873
PxpB	110	121.9	94.1	108.667	13.9479		88.4	114.5	99.2	100.7	13.1145		93.8	87	91.1	90.6333	3.42394
PxpC	85.8	121.2	128.2	111.733	22.73		88.8	68	99.7	85.5	16.1056		68.3	137.4	102.7	102.8	34.5501
PykA	89.4	92.3	90.5	90.7333	1.46401		108.3	109.8	108.7	108.933	0.776745		101.2	96.7	103.2	100.367	3.32916
PykF	93.5	85.7	93.6	90.9333	4.53248		99.7	88.5	107.6	98.6	9.5974		121.9	124.8	84.7	110.467	22.3616
PyrB	64	70	56.5	63.5	6.76387		102.3	126.7	133.6	120.867	16.4452		92.2	100.9	153.8	115.633	33.3383
PyrC	84.1	104.8	93.1	94	10.3793		90.2	100.9	95	95.3667	5.35942		93.6	118.6	119.6	110.6	14.7309
PyrD	89	109.5	123.1	107.2	17.166		95.3	96.6	72.4	88.1	13.6121		113.8	91.2	109	104.667	11.9069
PyrF	94.1	137.5	98.6	110.067	23.8643		86.7	91.3	104.7	94.2333	9.35165		97.7	92.6	96.7	95.6667	2.70247
PyrG	90.9	94.7	101.7	95.7667	5.47844		93.9	95	96	94.9667	1.0504		98	109.2	120.6	109.267	11.3001
PyrH	113.3	57.7	117.3	96.1	33.3155		107.1	111.6	105.1	107.933	3.32916		88.1	106.1	93.7	95.9667	9.21159
PyrI	56.7	73.2	65.5	65.1333	8.25611		105.5	122.4	104.2	110.7	10.1533		108	116	148.5	124.167	21.4496
QmcA	116.2	165.2	146.8	142.733	24.7518		58.1	102.4	84.2	81.5667	22.2671		65.2	73.8	88.2	75.7333	11.6212
QorA	131.5	109.2	109.8	116.833	12.7052		111	104.5	90.9	102.133	10.2569		84	86.4	72.6	81	7.37292
QorB	136	63.1	78.4	92.5	38.441		102.6	116.4	84.4	101.133	16.0503		140	86.4	92.6	106.333	29.3205
QueA	128.4	86.5	120.8	111.9	22.3229		90.8	85.5	112.2	96.1667	14.1359		88.4	97.5	89.9	91.9333	4.87887
QueC	103.7	64.4	102.8	90.3	22.4346		113	107.2	119.8	113.333	6.30661		86.1	108	95	96.3667	11.0138
QueD	217.5	71.8	323.8	204.367	126.512		0	0	0	0	0		133.2	153.8	0	95.6667	83.4876
QueE	205.8	138.5	148.3	164.2	36.3584		73.7	84.9	52.6	70.4	16.4009		77.8	53.2	65.1	65.3667	12.3022
QueF	75.7	119.4	80.8	91.9667	23.8944		86.2	121.6	76.9	94.9	23.5858		89.9	111.6	138	113.167	24.0882
RadA	99.5	115.5	89.6	101.533	13.0692		85.7	100.3	120.7	102.233	17.5799		83.5	103	102.1	96.2	11.0077
RaiA	69.7	102.3	153.5	108.5	42.2426		180	164.5	128.3	157.6	26.5317		28.3	35.6	37.8	33.9	4.97293
RapA	116.8	113.1	119.2	116.367	3.073		104.6	102.9	97.2	101.567	3.87599		82.8	83.8	79.7	82.1	2.13776
RapZ	92.6	74	127.4	98	27.1065		75.4	72.5	59.6	69.1667	8.41091		106.8	101.1	190.7	132.867	50.1662
RarA	120	96.9	112.7	109.867	11.8078		88.5	100.1	90.7	93.1	6.16117		86.8	92	112.4	97.0667	13.5312
RatA	85.6	100.9	117.3	101.267	15.8532		99.7	133.3	79.2	104.067	27.3131		89.4	106.9	87.7	94.6667	10.6284
RatB	76.8	129.3	99.1	101.733	26.3489		101.5	96.6	75.6	91.2333	13.7588		118.5	87.8	114.9	107.067	16.7822
RavA	37	59.1	30.6	42.2333	14.9534		103.2	61.4	58	74.2	25.1722		180.7	169.3	200.7	183.567	15.8951
RbbA	140.3	194.6	153	162.633	28.4029		100.7	117.4	68.1	95.4	25.0737		32.7	61.1	32.1	41.9667	16.5727
RbfA	118	109.9	121.6	116.5	5.9925		95.9	97.1	88.1	93.7	4.88672		92.8	90.7	85.9	89.8	3.53695
Rbn	99	100.8	87	95.6	7.502		93.5	82.3	118.3	98.0333	18.4232		115.9	99.1	104	106.333	8.63964
RbsA	86.6	118	111.4	105.333	16.5558		96.8	90.9	84.3	90.6667	6.25327		114.3	98.5	99.2	104	8.92693
RbsB	64	104	89.5	85.8333	20.2505		96.4	101.9	111	103.1	7.3736		107.1	114	112.1	111.067	3.56417
RbsC	78.4	85.3	150.4	104.7	39.7274		99.3	107.4	89.3	98.6667	9.06661		101.9	107.1	80.9	96.6333	13.8713
RbsD	0	0	0	0	0		0	0	0	0	0		0	0	0	0	0
RbsK	91.3	125.2	110.4	108.967	16.9954		112.6	98.9	90.7	100.733	11.0645		100.4	84.1	86.5	90.3333	8.80019
RclA	82.7	20.2	75.6	59.5	34.2194		36.4	47.9	22.5	35.6	12.7189		260.9	173.6	180.4	204.967	48.5589
RcnB	155.8	61.6	128.5	115.3	48.4674		122.1	41.6	78	80.5667	40.3113		98	111.8	102.5	104.1	7.03776
RcsB	172.5	131.8	147.8	150.7	20.5044		127.9	127.8	192.1	149.267	37.0948		0.1	0	0	0.0333333	0.057735
RcsC	100.7	143.9	117.3	120.633	21.792		0	0	0	0	0		224.2	144.1	169.8	179.367	40.898
RcsD	148.7	119.6	175.1	147.8	27.7609		4.1	5.2	6.4	5.23333	1.15036		127.6	139.1	174	146.9	24.1634
RcsF	96.9	90.6	81	89.5	8.00687		86.4	93.2	116.3	98.6333	15.673		121.8	111.4	102.5	111.9	9.65971
RdgB	103.2	117.7	84.4	101.767	16.6962		93.7	91.6	116.4	100.567	13.7522		78.7	76.9	137.4	97.6667	34.4218
RdgC	110.7	140.2	127.9	126.267	14.8177		106.3	102.9	93	100.733	6.90966		78.9	73.4	66.7	73	6.10983
RecA	85	83.6	110.4	93	15.0851		101.3	109.3	92.5	101.033	8.40317		102.7	97	118.2	105.967	10.971
RecB	131.2	92.4	63.3	95.6333	34.0653		79.4	57.6	165.6	100.867	57.1105		67.9	122.4	120.2	103.5	30.8501
RecC	141.6	89.6	81	104.067	32.788		92.8	103.4	74.6	90.2667	14.5662		105.4	87.3	124.3	105.667	18.5014
RecG	137.7	118.6	100.6	118.967	18.5527		109.8	86.3	65.5	87.2	22.1637		65.2	97.1	119.2	93.8333	27.1478
RecJ	100.2	133.6	91.5	108.433	22.2248		87.4	87.7	93.3	89.4667	3.32315		91.3	74.7	140.3	102.1	34.1075
RecN	252.4	41.3	188.4	160.7	108.242		81.3	70	92	81.1	11.0014		51	69.4	54.2	58.2	9.83056
RecQ	0	271.6	146.5	139.367	135.94		0	169.7	0	56.5667	97.9763		0	147.4	164.7	104.033	90.5098
RecR	127.6	59.9	85.3	90.9333	34.1998		117	111.9	95.9	108.267	11.0092		119	98.8	84.6	100.8	17.287
RelA	95.6	104.4	119	106.333	11.8192		109	95.7	114.3	106.333	9.58245		81.3	78.5	102.1	87.3	12.8934
RelB	123.8	106	123.1	117.633	10.0808		104.7	103.2	96	101.3	4.65081		81.1	94.4	67.7	81.0667	13.35
Rep	115.5	116.6	104.3	112.133	6.80612		91	84.7	118.7	98.1333	18.0877		92.1	110.5	66.7	89.7667	21.993
RfaB	96.1	173.2	86.2	118.5	47.6295		101.3	107.3	98.6	102.4	4.45309		80.3	79.1	77.9	79.1	1.2
RfaC	73.6	141	81.1	98.5667	36.9392		91.3	88	85.6	88.3	2.86182		99.1	98.3	142.1	113.167	25.0602
RfaF	119.4	102.9	120.6	114.3	9.8909		87.9	102.4	102.3	97.5333	8.34286		102.7	93.9	67.9	88.1667	18.0946
RfaG	98.3	136.1	81.2	105.2	28.0929		92	90.3	92.2	91.5	1.04403		155.6	60.7	93.6	103.3	48.1879
RfaH	57.4	125.5	80	87.6333	34.6858		83.3	114.9	101.5	99.9	15.8606		140.7	100	96.7	112.467	24.5064
RfaI	0	168.7	96.1	88.2667	84.6224		142.9	72.9	125	113.6	36.3658		98.4	74.9	121	98.1	23.0515
RfaJ	89.6	102.1	71.1	87.6	15.5965		113.7	109.7	77.4	100.267	19.9039		108.2	114.9	113.4	112.167	3.51615
RfaL	88.8	118.1	99	101.967	14.8736		93.6	109	35.5	79.3667	38.7621		132.2	128.5	95.2	118.633	20.378
RfaP	124.9	144.3	112	127.067	16.2586		126.5	54.2	104.9	95.2	37.1132		112	49.8	71.3	77.7	31.59
RfaQ	141	69	146	118.667	43.0852		109.1	99.3	90.5	99.6333	9.30448		51.5	106.4	87.2	81.7	27.8602
RfaS	133.9	51.1	153.3	112.767	54.2787		106.2	74.3	75.7	85.4	18.0269		144.6	133.3	27.5	101.8	64.5933
RfaY	115.5	146.8	125.4	129.233	15.9982		106.7	74.5	92.5	91.2333	16.1373		81.2	60.1	97.4	79.5667	18.7036
RfaZ	97.7	0	465.6	187.767	245.52		0	0	0	0	0		119.1	217.6	0	112.233	108.962
RfbA	102	99.6	104.7	102.1	2.55147		95.1	96.5	87.2	92.9333	5.01431		105.1	107.3	102.5	104.967	2.40278
RfbB	104.5	94.8	93.8	97.7	5.91016		103.8	105.3	100.6	103.233	2.40069		94.3	93	109.9	99.0667	9.40443
RfbC	100.6	112.3	142.5	118.467	21.62		71.9	82	94.7	82.8667	11.4247		76.3	58	161.7	98.6667	55.35
RfbD	118.7	75.2	110.6	101.5	23.1337		117.3	85.2	99.9	100.8	16.0689		107.6	94.6	91	97.7333	8.73232
RffG	123	95.5	126.5	115	16.9779		95.7	86.1	110.1	97.3	12.0797		97.8	104.6	60.6	87.6667	23.6857
RffH	128.6	47.1	112.5	96.0667	43.1637		102.9	95.1	102.9	100.3	4.50333		119.7	95.2	95.8	103.567	13.9751
RhlB	104.7	94.7	106.8	102.067	6.46555		102.2	111.6	98.2	104	6.87895		103.4	95.7	82.8	93.9667	10.4088
RhlE	134	117	124	125	8.544		100.7	93.8	83.3	92.6	8.76185		86.3	87.2	73.7	82.4	7.54785
RhmA	0	214	103.4	105.8	107.02		0	221.4	0	73.8	127.825		77.3	119.4	164.4	120.367	43.558
Rho	113.7	111.1	113.2	112.667	1.37961		96.6	91.1	88.2	91.9667	4.26654		92.2	100.8	93	95.3333	4.75114
RibA	103.3	109.8	109.5	107.533	3.66924		93.8	122.6	91.5	102.633	17.3298		83.9	90.4	95.3	89.8667	5.71868
RibB	105.8	50.5	95.6	83.9667	29.4283		72.6	78.1	62.1	70.9333	8.12917		115.6	107.1	212.6	145.1	58.611
RibC	82.4	114.9	90.7	96	16.8858		91	120.5	70.5	94	25.1346		121.9	102.3	105.8	110	10.4532
RibD	104	136.5	127.9	122.8	16.8395		97.1	97.8	104.9	99.9333	4.31548		82.5	75.4	73.8	77.2333	4.63069
RibE	97.4	104.8	76.6	92.9333	14.621		104.8	123.6	104.8	111.067	10.8542		89.4	97.4	101.1	95.9667	5.98025
RibF	90	138.8	97.3	108.7	26.3217		80.9	114.2	72.8	89.3	21.9411		93.1	96.3	116.4	101.933	12.6303
RidA	79.4	87.8	85.4	84.2	4.32666		106.9	122.9	96.1	108.633	13.4838		81.1	123.9	116.4	107.133	22.8553
RimI	77.6	116.1	101.6	98.4333	19.4444		92.4	88.1	96.8	92.4333	4.3501		140.8	98.5	88.2	109.167	27.8751
RimJ	93.6	78.9	101.9	91.4667	11.6475		105.3	104.9	102.9	104.367	1.28582		100.8	90	121.8	104.2	16.1703
RimK	95.7	101.7	116.1	104.5	10.4843		125.5	143.9	46.6	105.333	51.6899		92	73	105.4	90.1333	16.2805
RimL	124.3	72.8	79.2	92.1	28.069		83.3	58.7	130.9	90.9667	36.7055		123.2	129.2	98.3	116.9	16.3851
RimM	111.2	125.3	102.2	112.9	11.6435		78.3	82.7	96.3	85.7667	9.38367		106.5	95.7	101.8	101.333	5.4151
RimO	114.7	125.2	98.4	112.767	13.5042		96.8	110.8	89.8	99.1333	10.6927		77.1	97.4	89.7	88.0667	10.2481
RimP	108.8	142.6	96.3	115.9	23.9527		94.8	90.9	88.3	91.3333	3.27159		74.3	96	108	92.7667	17.0811
RlhA	125.2	129.8	118.8	124.6	5.52449		98.9	87.7	106.2	97.6	9.31826		85.6	68.4	79.5	77.8333	8.72028
RlmA	100.9	122.8	117.5	113.733	11.4256		100.4	98.5	130.7	109.867	18.0672		79.1	91.3	58.6	76.3333	16.5246
RlmB	113.5	75.5	112.8	100.6	21.7401		88.8	98.7	109	98.8333	10.1007		86.6	115.5	99.7	100.6	14.471
RlmC	129.3	105.8	104.6	113.233	13.9271		104.1	101.5	98.3	101.3	2.90517		68.5	70.1	117.8	85.4667	28.0129
RlmD	85.3	83.4	154	107.567	40.2237		66.9	66.5	112.7	82.0333	26.5589		72.5	173.5	85.4	110.467	54.9682
RlmE	91.5	150.2	88.4	110.033	34.8199		89.6	87.1	88.5	88.4	1.253		81.2	86.8	136.7	101.567	30.5549
RlmF	136.1	97	98.3	110.467	22.2086		93.9	88.5	113.1	98.5	12.929		110.2	84.4	78.5	91.0333	16.8589
RlmG	128.7	147.5	112.5	129.567	17.5161		96.6	82	83.4	87.3333	8.05564		60.5	82.5	106.4	83.1333	22.9566
RlmH	145.5	103.8	128.5	125.933	20.9682		93.4	116.4	88.2	99.3333	15.0071		95.1	71.1	58	74.7333	18.815
RlmI	116	84.9	102.5	101.133	15.595		82.7	101.7	81.8	88.7333	11.2385		112.5	111	106.9	110.133	2.89885
RlmJ	111.8	119.9	107.2	112.967	6.42988		115.5	95.5	94.5	101.833	11.8462		91.1	87	77.4	85.1667	7.0316
RlmL	108.9	116.4	100	108.433	8.20995		93	94.8	87	91.6	4.08412		98.1	97.3	104.4	99.9333	3.88887
RlmM	127.2	82.2	130	113.133	26.8256		101.1	85.3	74.6	87	13.3315		90.7	112.9	96	99.8667	11.5941
RlmN	109.9	107.4	84.6	100.633	13.9414		99.8	77.1	110.5	95.8	17.0555		93.2	94.3	123.1	103.533	16.9542
RlpA	111	89	120.3	106.767	16.0737		115.9	101.7	94.4	104	10.933		89.9	83.2	94.6	89.2333	5.72917
RluA	136.5	74.2	82.1	97.6	33.9192		120.3	87.8	158.7	122.267	35.4909		93.4	74.9	72.1	80.1333	11.5743
RluB	100	56.4	151.9	102.767	47.8101		86.3	79.4	85.4	83.7	3.751		71.5	135.3	133.8	113.533	36.4097
RluC	127.2	103.5	127.2	119.3	13.6832		99.8	104.9	104.4	103.033	2.81129		70.8	93.7	68.6	77.7	13.9
RluD	106.6	89.9	96.5	97.6667	8.41091		88.6	103	89.7	93.7667	8.01519		119.5	97.1	109.1	108.567	11.2095
RluE	107.4	97	87	97.1333	10.2007		93.8	96	106	98.6	6.50231		106	121.1	85.7	104.267	17.7635
RluF	105.5	112	133.2	116.9	14.4855		86.1	78	119.9	94.6667	22.2248		76.6	79.2	109.5	88.4333	18.2905
RmuC	78.9	108.7	98	95.2	15.096		93.7	92.8	102.3	96.2667	5.24436		106.3	116.1	103.2	108.533	6.73375
Rna	88.7	88	94.2	90.3	3.39559		97.1	114.6	102.2	104.633	9.00019		113.3	119.2	82.7	105.067	19.5935
Rnb	103.8	104.5	97.6	101.967	3.79781		101.4	100.2	101.4	101	0.69282		95.6	99.9	95.7	97.0667	2.45425
Rnc	99.4	128.4	115.2	114.333	14.5194		83.1	80.1	90.2	84.4667	5.18684		103.5	94.8	105.3	101.2	5.61516
Rnd	121.3	116	113.6	116.967	3.93997		81.3	91.6	83.1	85.3333	5.50121		93	113.3	86.8	97.7	13.8611
Rne	98.7	100.7	95.9	98.4333	2.41109		104	102.3	111.1	105.8	4.66798		86.8	95	105.4	95.7333	9.32166
Rng	107.9	84	128.5	106.8	22.2704		72.7	107.6	57.9	79.4	25.5184		118.5	135.2	87.6	113.767	24.1504
RnhA	121	89.4	99.5	103.3	16.1391		115.3	62.4	120.4	99.3667	32.1155		97.9	119.7	74.4	97.3333	22.6553
RnhB	93.3	203.8	107.5	134.867	60.1187		70.4	67.2	55.5	64.3667	7.84368		137.3	84.2	80.8	100.767	31.6844
Rnk	93.1	126.5	87.8	102.467	20.9815		119.4	140.3	89.1	116.267	25.7434		93.9	89.3	60.5	81.2333	18.1023
RnlA	83.2	97.3	106.6	95.7	11.7818		87.5	129.4	106.3	107.733	20.9867		93.6	75.2	120.9	96.5667	22.994
RnpA	117.6	150.1	126	131.233	16.8702		95.9	69.1	86.8	83.9333	13.628		72.4	90.5	91.6	84.8333	10.7816
Rnr	116	100.3	121.2	112.5	10.8807		95.4	122.2	110.7	109.433	13.4448		74.7	76.4	83.2	78.1	4.49778
Rnt	126.4	118.4	97.2	114	15.0891		98.1	92.6	94.5	95.0667	2.79344		90.7	102.4	79.8	90.9667	11.3024
Rob	113.7	134.4	125.3	124.467	10.3751		96.2	79.2	89.4	88.2667	8.55648		83.2	91.1	87.5	87.2667	3.95517
RodZ	108	100.5	97.3	101.933	5.49212		97.6	106.2	123.9	109.233	13.4098		81	92.3	93.2	88.8333	6.79877
Rof	100.4	119.3	110.6	110.1	9.45992		99.7	92.1	95.7	95.8333	3.80175		102.3	87	92.9	94.0667	7.71643
RoxA	105.7	70.9	104.2	93.6	19.6731		84.4	123.7	128.8	112.3	24.2963		95.7	102.3	84.3	94.1	9.10604
Rpe	93.2	86.6	108.2	96	11.0689		93.7	127.3	98.1	106.367	18.2618		113.2	90.6	89.1	97.6333	13.502
Rph	127.1	118.7	141.3	129.033	11.4234		88	81.7	130.7	100.133	26.6583		89.3	75.4	47.8	70.8333	21.1235
RpiA	95.8	101.2	105.1	100.7	4.67012		85.2	91.7	115.4	97.4333	15.8954		108.3	98	99.4	101.9	5.58659
RpiB	70.5	89.5	55.6	71.8667	16.9913		85.3	109.2	111.3	101.933	14.4431		123.5	155	100.1	126.2	27.5494
RpiR	97.3	94	96	95.7667	1.66233		85.8	112.4	97.5	98.5667	13.332		111	95.9	110	105.633	8.44413
RplA	103.8	109.5	103.7	105.667	3.32014		103	116.2	92.5	103.9	11.8756		80.4	100.5	90.5	90.4667	10.05
RplB	105	104.2	112.9	107.367	4.80867		96.4	102.6	116.7	105.233	10.403		85	91.7	85.4	87.3667	3.7581
RplC	94.8	91.8	129.6	105.4	21.0114		90.8	96	123.7	103.5	17.6859		98.5	91.9	83.1	91.1667	7.72615
RplD	126.9	92.7	114.9	111.5	17.3517		77.3	108	110.4	98.5667	18.4565		98.4	79.9	91.6	89.9667	9.35753
RplE	95.5	149.9	91.3	112.233	32.6878		98.5	105.5	89.5	97.8333	8.02081		92	84.1	93.6	89.9	5.08626
RplF	114.5	112.6	117.1	114.733	2.25906		100.8	89.7	90.5	93.6667	6.19058		102.7	91.4	80.8	91.6333	10.9519
RplI	99.6	134.8	107.2	113.867	18.5228		96.8	97.9	89	94.5667	4.85215		107.1	89.2	78.4	91.5667	14.4956
RplJ	114.4	123.2	110.4	116	6.54828		96.7	96.6	108.3	100.533	6.72632		83.2	91.8	75.3	83.4333	8.25247
RplK	114	109	115.6	112.867	3.44287		110.2	85.5	100	98.5667	12.4122		101.1	71.8	92.7	88.5333	15.0879
RplL	104.6	92.2	107.8	101.533	8.23974		103.3	108.7	112.8	108.267	4.7648		91.3	99.4	80.1	90.2667	9.69141
RplM	114.2	94.5	112	106.9	10.7949		98.6	96.2	98.3	97.7	1.30767		101.9	95.4	88.9	95.4	6.5
RplN	95.4	130.2	116.1	113.9	17.504		90.3	107.5	88.7	95.5	10.4231		88	98.7	85.1	90.6	7.1631
RplO	102.6	109.3	113.6	108.5	5.54346		99.1	101.7	105.2	102	3.06105		94.3	93.4	80.8	89.5	7.54785
RplP	115.6	108.5	100.5	108.2	7.55447		83.3	110	95.6	96.3	13.3638		95.9	88.6	102.2	95.5667	6.80612
RplQ	90.5	109.6	110.2	103.433	11.2046		98.2	76.6	108.3	94.3667	16.1939		97.5	95.1	114.1	102.233	10.3467
RplR	111.5	56	115.6	94.3667	33.2897		90.8	96.7	104.3	97.2667	6.76782		131	102.4	91.7	108.367	20.3181
RplS	129.5	98.3	108.8	112.2	15.8755		104.6	98.9	105.8	103.1	3.68646		79.4	81.4	93.4	84.7333	7.57188
RplT	82.5	158.1	111.6	117.4	38.1323		91.7	100.4	75.9	89.3333	12.4203		102.9	97	79.8	93.2333	12.0018
RplU	104.1	131.1	113.3	116.167	13.7264		101.4	97.9	85.1	94.8	8.58079		98.2	77.3	91.6	89.0333	10.6838
RplV	114.5	134.8	101.8	117.033	16.6452		94.4	86.5	100.5	93.8	7.01926		93.1	86.1	88.3	89.1667	3.57957
RplW	192.6	85.3	118.2	132.033	54.9713		81	93.1	82	85.3667	6.7159		89.9	77.6	80.3	82.6	6.46452
RplX	120.8	126.4	115.4	120.867	5.5003		95.5	84	94.4	91.3	6.34586		71.4	98.2	93.9	87.8333	14.3932
RplY	98.3	111.2	94.7	101.4	8.67583		118.1	108	96.8	107.633	10.6547		105.9	95.1	71.9	90.9667	17.3728
RpmA	121.5	80.3	104.3	102.033	20.6933		95.4	110.6	73	93	18.9145		110.7	128.8	75.5	105	27.1033
RpmB	114.3	97.5	77.3	96.3667	18.526		106.4	113.7	112.7	110.933	3.95769		88.5	109.4	80.1	92.6667	15.0879
RpmC	139.7	101.8	121.5	121	18.9549		85.4	130.8	104.3	106.833	22.8058		58.7	95.3	62.5	72.1667	20.1239
RpmD	120.6	126.8	110.3	119.233	8.33447		89.1	87.2	100.8	92.3667	7.36501		92.3	87.7	85.3	88.4333	3.55715
RpmE	97.9	99.9	101.2	99.6667	1.66233		126.2	118.3	87.3	110.6	20.5614		89.1	103	77.1	89.7333	12.9616
RpmF	123.3	108	86.2	105.833	18.6447		91.3	122.7	114.6	109.533	16.3016		94.5	71.2	88.1	84.6	12.0379
RpmG	129.1	101.7	125.2	118.667	14.8224		101.2	68.6	87.9	85.9	16.3918		85.3	105.9	95.2	95.4667	10.3026
RpmH	117.9	135.9	137.4	130.4	10.8513		100.3	95.9	88.5	94.9	5.96322		67.6	78.2	78.3	74.7	6.14898
RpmI	123.8	119.8	121.2	121.6	2.02978		72.2	143.6	77.6	97.8	39.7558		95.2	65.3	81.3	80.6	14.9623
RpoA	112.1	100.7	110.4	107.733	6.15007		106	104.1	94.3	101.467	6.2788		86.1	97.6	88.8	90.8333	6.0136
RpoB	107.6	103.3	112.1	107.667	4.40038		103.5	100.3	102	101.933	1.60104		92.9	93.9	84.4	90.4	5.22015
RpoC	109.7	108.3	107.2	108.4	1.253		100.7	100.5	102.1	101.1	0.87178		90.3	91.6	89.6	90.5	1.01489
RpoD	108.4	82.5	105.2	98.7	14.1206		99.6	86.3	96.5	94.1333	6.95869		100.3	91	130.2	107.167	20.4823
RpoE	105.1	148.7	91.1	114.967	30.0409		84.8	89.2	91.9	88.6333	3.58376		99.7	89.6	99.9	96.4	5.88982
RpoH	94.7	164.1	80.5	113.1	44.7343		97	129.4	125.5	117.3	17.6881		0	58	150.6	69.5333	75.9596
RpoN	88.9	103.7	90.5	94.3667	8.1224		114.6	102.9	86.3	101.267	14.2205		104.1	77.7	131.3	104.367	26.801
RpoS	10.3	10.9	14.5	11.9	2.27156		55.4	83.2	50.2	62.9333	17.743		239.2	172.6	263.6	225.133	47.1026
RpoZ	117.4	134.6	113.4	121.8	11.2641		89.7	90.4	99.1	93.0667	5.23673		102.3	80.2	72.9	85.1333	15.3083
RppH	64.1	109.2	90.9	88.0667	22.6831		105.4	114.9	115.8	112.033	5.76223		108.1	100.7	90.9	99.9	8.62786
RpsA	120.3	114.9	98.1	111.1	11.5776		96	92.1	106.3	98.1333	7.33644		96.1	91.6	84.6	90.7667	5.79511
RpsB	112.9	121	109.1	114.333	6.0781		98.3	94.6	89.8	94.2333	4.26185		91.3	96.8	86.2	91.4333	5.30126
RpsC	117.3	103.8	126.1	115.733	11.2322		87.7	101.3	102.2	97.0667	8.12424		84.9	93.2	83.6	87.2333	5.20801
RpsD	109.2	102.6	120	110.6	8.78408		106.1	92.3	96	98.1333	7.14306		83.4	97.7	92.7	91.2667	7.25695
RpsE	111.7	108.9	116.9	112.5	4.05956		91.1	97.9	96.1	95.0333	3.52326		101.7	88.5	87.2	92.4667	8.02268
RpsF	122.7	81.3	118.4	107.467	22.7628		96.5	83.5	122.9	100.967	20.0762		89.6	105.2	79.8	91.5333	12.8099
RpsG	118.6	101.3	115.6	111.833	9.24464		103.4	103.6	98.1	101.7	3.11929		78.4	95.6	85.3	86.4333	8.65583
RpsH	121.6	79	109.2	103.267	21.911		86.5	77.4	138.1	100.667	32.736		109.4	108	70.7	96.0333	21.9505
RpsI	110.7	107.6	105.9	108.067	2.43379		98.6	90.7	112.9	100.733	11.2527		99.9	94.8	78.9	91.2	10.9531
RpsJ	111.3	115	116.5	114.267	2.67644		97.1	102.6	93.4	97.7	4.62925		90.7	92.7	80.8	88.0667	6.37207
RpsK	113.2	103.2	122.3	112.9	9.55353		88.5	121.3	84.5	98.1	20.1911		78.9	97.3	90.7	88.9667	9.32166
RpsL	106.6	117.3	87.6	103.833	15.0421		90.3	80.1	170.1	113.5	49.2816		81.8	84.7	81.5	82.6667	1.7673
RpsM	100.8	119.9	109.3	110	9.56922		106	95.7	91.5	97.7333	7.46079		81.6	110.2	85	92.2667	15.6235
RpsN	129.3	110.9	104.8	115	12.7542		100.3	95.2	83.7	93.0667	8.50314		103.4	88.4	84	91.9333	10.1712
RpsO	111.7	102.5	140	118.067	19.5439		101.3	63.9	95.7	86.9667	20.1716		79.9	104.1	100.8	94.9333	13.1234
RpsP	116.6	95.8	101.7	104.7	10.7196		99.2	93.7	102.9	98.6	4.62925		98.5	102.3	89.4	96.7333	6.62898
RpsQ	115.6	95.8	92.8	101.4	12.3887		123.1	97.9	95.8	105.6	15.1918		113	97.1	69	93.0333	22.2801
RpsR	94.2	136.9	98.5	109.867	23.5101		108.8	98.8	86.9	98.1667	10.9637		106.4	81.4	88	91.9333	12.9558
RpsS	107.1	108.3	111.3	108.9	2.16333		117	108	97	107.333	10.0167		74.6	96	80.6	83.7333	11.0387
RpsT	113.4	114.5	95.7	107.867	10.551		104.2	75.4	112.3	97.3	19.3936		89.4	105.3	89.9	94.8667	9.03899
RpsU	122.9	93.9	123.8	113.533	17.0089		84.4	87.5	113	94.9667	15.6941		95	98.9	80.6	91.5	9.63898
RraA	101.5	94.9	88.6	95	6.45058		104.6	103.3	72	93.3	18.4578		99.2	114.9	121	111.7	11.2468
RraB	65.9	60.7	168.4	98.3333	60.7352		137.9	141.2	50.3	109.8	51.5549		69.5	57.8	148.4	91.9	49.2789
Rsd	75.6	74.7	82.3	77.5333	4.15251		41.4	54.1	117	70.8333	40.4826		105.5	187.7	161.9	151.7	42.0386
RseA	102.5	139.3	101.3	114.367	21.6012		98.9	87	95	93.6333	6.06658		91.2	78.9	105.9	92	13.5178
RseB	103.3	142.2	86.2	110.567	28.6985		103.5	81.5	96.7	93.9	11.2641		82.1	56.6	147.8	95.5	47.0535
RseC	106.6	387.8	148	214.133	151.818		109	65.3	83.3	85.8667	21.9628		0	0	0	0	0
RseP	98.6	144.8	92.4	111.933	28.6317		105.4	103.3	79.9	96.2	14.1552		83.9	89.8	102	91.9	9.23093
RsfS	146.8	126.9	117.6	130.433	14.9172		108.5	95.9	69.2	91.2	20.0671		76	72.7	86.4	78.3667	7.15006
RsgA	115.3	128	122.8	122.033	6.38462		89.7	104.3	89.1	94.3667	8.60775		79.1	89.6	81.9	83.5333	5.43722
RsmA	130.1	103.1	125.8	119.667	14.5074		97.5	81.2	95.6	91.4333	8.9131		81.5	87.2	98	88.9	8.38033
RsmB	107.2	121.5	103.2	110.633	9.62098		100.6	90.2	82.2	91	9.22605		108.1	101.8	85.2	98.3667	11.8298
RsmC	152.4	156.9	119.9	143.067	20.1887		72.3	59	64.7	65.3333	6.67258		124.8	54.9	95.1	91.6	35.0812
RsmD	104.6	113.7	102.4	106.9	5.99083		106.3	102.8	99.5	102.867	3.40049		80.4	102.4	88	90.2667	11.1738
RsmE	112.2	82.6	98.9	97.9	14.8253		103.5	53.5	100.5	85.8333	28.0416		111.2	97.2	140.4	116.267	22.0412
RsmF	112.5	122.1	101.2	111.933	10.4615		80.2	117.1	119.4	105.567	21.9983		69.8	89.7	87.8	82.4333	10.982
RsmG	131.3	131.4	142.4	135.033	6.37992		82.2	86.1	82.9	83.7333	2.07926		78.8	67.9	96.9	81.2	14.6482
RsmH	118.5	135.6	121.1	125.067	9.2143		115	100.9	80.6	98.8333	17.2929		72.7	85.6	70.1	76.1333	8.3008
RsmI	83.1	132.3	107	107.467	24.6033		88.4	104.8	106.8	100	10.0955		88.2	66.8	122.6	92.5333	28.1513
RsmJ	175.8	51.8	94.6	107.4	62.9832		56.4	113.1	89	86.1667	28.456		125	112.2	82	106.4	22.0789
RspR	123.4	86.8	105.6	105.267	18.3023		81.6	111.3	91.7	94.8667	15.1011		112.1	101.3	86.3	99.9	12.9569
RssA	113.9	23.6	87.2	74.9	46.3895		101.6	129.4	90.5	107.167	20.0385		147.3	140.7	65.9	117.967	45.2117
RssB	156.2	125.3	136.5	139.333	15.6436		112.2	178.7	180.5	157.133	38.9238		10.6	0	0	3.53333	6.11991
RstA	307.1	301.1	269.4	292.533	20.2574		1.9	3.9	4.1	3.3	1.21655		2.6	2.9	6.9	4.13333	2.40069
RstB	261.4	445.4	193.2	300	130.456		0	0	0	0	0		0	0	0	0	0
RsuA	90.1	92.7	85	89.2667	3.91706		93.8	103.5	89.3	95.5333	7.25695		109.7	115.1	120.9	115.233	5.60119
RsxB	154.5	107.9	120	127.467	24.1806		84.9	82.2	75.8	80.9667	4.67369		150.2	83.3	41.2	91.5667	54.9682
RsxC	117.5	117.8	123.3	119.533	3.26548		86.5	88.3	115	96.6	15.9603		85.4	101.6	64.6	83.8667	18.5476
RsxG	133.2	91.6	130.4	118.4	23.2517		104.1	76.6	92.7	91.1333	13.8168		100.5	83.6	87.4	90.5	8.86623
RtcB	112.1	112.8	0	74.9667	64.924		137.4	90.7	0	76.0333	69.8643		173.4	109.6	164	149	34.4436
RutB	33.1	99.5	76.6	69.7333	33.7284		138	138.1	127.2	134.433	6.26445		76.5	92.7	118.3	95.8333	21.0754
RutR	84.8	73.3	90	82.7	8.54576		79.1	87.5	81.3	82.6333	4.35584		170.4	100.5	133.1	134.667	34.9763
RuvA	33.2	384.1	47.1	154.8	198.701		24.7	53.4	259.9	112.667	128.313		7.5	35.2	55	32.5667	23.8592
RuvB	77.6	109.9	102.2	96.5667	16.8708		89.4	155.7	108.5	117.867	34.128		114.6	89.9	52.3	85.6	31.3718
Sad	81.7	77.2	103.7	87.5333	14.1804		97.7	104.6	125.4	109.233	14.4195		87.1	115.3	107.3	103.233	14.5332
SanA	100.9	97.9	88.4	95.7333	6.52559		92.7	105.5	77.3	91.8333	14.12		138.7	68.7	129.9	112.433	38.1289
SapA	87.4	129.4	81.3	99.3667	26.1878		81.2	127.7	70.1	93	30.5593		89.9	97.8	135.2	107.633	24.198
SapD	111.5	112.8	87.8	104.033	14.0735		90	157.9	40.2	96.0333	59.0815		79.1	126	94.8	99.9667	23.8731
SapF	130.3	0	130.4	86.9	75.2576		112.8	167.1	172.1	150.667	32.8887		0	0	187.4	62.4667	108.195
SbcB	97.5	105.9	119.1	107.5	10.8885		86.3	144	84.1	104.8	33.966		90.8	86.9	85.6	87.7667	2.70617
SbcC	139.9	61	131.6	110.833	43.356		72.6	119.7	121.2	104.5	27.6364		94	111.6	48.4	84.6667	32.6174
SbmA	147.6	229.5	0	125.7	116.307		119.3	125.9	103	116.067	11.7874		0	0	174.8	58.2667	100.921
SbmC	168.9	130.1	159.8	152.933	20.291		104.5	79.3	96.5	93.4333	12.8769		56.1	44.7	60.1	53.6333	7.99083
ScpB	108.9	106	114.5	109.8	4.32088		66.8	128.8	55.8	83.8	39.3573		102.9	110.1	106.3	106.433	3.60185
SdaA	121.4	106.9	113.3	113.867	7.26659		112.7	91.9	110.4	105	11.4031		80	79.3	84.1	81.1333	2.59294
SdaB	142.4	132	149.5	141.3	8.8017		92.5	94	73.2	86.5667	11.6001		60.7	82.7	72.9	72.1	11.0218
SdaC	155	147.8	155.3	152.7	4.24617		66.4	65.1	136.5	89.3333	40.8527		64.8	58.5	50.5	57.9333	7.16682
SdhA	39.9	60.6	43.3	47.9333	11.1006		84.1	88.4	101.7	91.4	9.17551		160	152.1	170	160.7	8.97051
SdhB	42.7	46.9	47.5	45.7	2.61534		82.9	83.7	102.7	89.7667	11.2077		137.9	161.5	194.2	164.533	28.2723
SdhC	0	0	0	0	0		0	0	0	0	0		0	0	0	0	0
SdhD	46.7	49	49.4	48.3667	1.45717		82.2	60.3	148.3	96.9333	45.8127		160.2	181.9	121.9	154.667	30.3803
SdhE	61.8	69.4	97.7	76.3	18.9185		149.7	90.3	60	100	45.6299		164	84.5	122.6	123.7	39.7614
SdiA	135.9	116.7	159.8	137.467	21.5927		85.6	90.6	99	91.7333	6.77151		73.4	82.6	56.5	70.8333	13.238
SecA	110.1	107.8	107.5	108.467	1.42244		90.4	127.1	79.6	99.0333	24.8991		95.5	100.2	81.8	92.5	9.55981
SecB	99.6	94.3	128	107.3	18.1215		104.9	103.3	98.6	102.267	3.27465		87	90.1	94.2	90.4333	3.61156
SecD	122	103.9	119.3	115.067	9.76439		107.4	99.2	101.8	102.8	4.19047		80.5	92.8	73	82.1	9.9965
SecE	87.3	94.9	120.6	100.933	17.4506		120.3	106.9	83.6	103.6	18.5712		120.3	111.6	54.5	95.4667	35.7439
SecF	115.3	91.3	123.8	110.133	16.8548		73.7	102.1	137.2	104.333	31.8089		91.5	100.6	64.5	85.5333	18.7751
SecG	109.7	94.5	104.6	102.933	7.73585		113.2	109.8	114.4	112.467	2.38607		81.6	101	71.2	84.6	15.1248
SecY	121.4	133.9	107.7	121	13.1046		134.1	92.9	92.2	106.4	23.9915		48.1	85.9	83.8	72.6	21.2436
SelA	98.7	92.8	88.7	93.4	5.02693		88.6	103.4	102.6	98.2	8.32346		115.4	101.5	108.3	108.4	6.95054
SelB	113.4	108.5	102.4	108.1	5.5109		86.5	91.6	106.4	94.8333	10.3365		101	109.8	80.3	97.0333	15.1447
SelD	94.9	114	111.1	106.667	10.2929		117.2	101.7	113.1	110.667	8.0314		89.5	80.5	78	82.6667	6.04842
SelO	102.1	107.3	106.7	105.367	2.84488		94.4	94.2	97.6	95.4	1.90788		109.9	111.7	76.1	99.2333	20.0543
SelU	134.3	107.8	102.7	114.933	16.9648		95.8	144.1	112.7	117.533	24.5101		95.9	106.6	0	67.5	58.701
SeqA	128.5	81.3	99.8	103.2	23.783		116	79.5	124.5	106.667	23.9078		91.6	94.3	84.5	90.1333	5.06195
SerA	51.3	43.6	50.3	48.4	4.18688		99.1	107.6	94.2	100.3	6.78012		124	163.4	166.4	151.267	23.6612
SerB	101.5	100.6	115.3	105.8	8.23954		104.5	117.4	137.5	119.8	16.6304		72.4	89.3	61.6	74.4333	13.9615
SerC	87.6	89	87.3	87.9667	0.907377		97.1	105.2	91.6	97.9667	6.8413		111	100	131.1	114.033	15.7703
SerS	104.9	105.7	102.6	104.4	1.60935		100.3	92.1	96.6	96.3333	4.1065		97.2	101	99.6	99.2667	1.9218
SfsA	100	147.5	136.2	127.9	24.8139		79.1	103.8	79.2	87.3667	14.2318		89.1	85.9	79.2	84.7333	5.05206
SgbH	118.6	109.1	112.8	113.5	4.78853		87.7	116.8	79.7	94.7333	19.5244		94.2	75.6	105.6	91.8	15.1433
SixA	91.7	117.3	96.9	101.967	13.5312		84.3	83.4	73.1	80.2667	6.22281		105.9	122	125.4	117.767	10.4165
Skp	88.7	124	106.8	106.5	17.6519		79.8	106.6	91.1	92.5	13.4547		100.3	93.5	109.3	101.033	7.92549
SlmA	88.9	154.8	105.7	116.467	34.2439		89.2	66.8	108.6	88.2	20.9179		73.6	94.8	117.6	95.3333	22.0048
Slp	134.8	133.4	140.2	136.133	3.59073		98.9	139.9	109.6	116.133	21.2665		40	57.5	45.6	47.7	8.937
Slt	76	116.2	73.7	88.6333	23.9011		96.3	122.8	98.3	105.8	14.7564		130.7	111.1	75	105.6	28.2544
SlyA	104.6	96.1	98.9	99.8667	4.33167		114.2	106.6	112.3	111.033	3.95517		113.3	85.4	68.7	89.1333	22.5332
SlyB	146.8	191	161.4	166.4	22.5202		68.5	66.8	64.5	66.6	2.00749		75.1	75.5	50.5	67.0333	14.3197
SlyD	97.2	94	114	101.733	10.7431		99.2	113.7	107.3	106.733	7.26659		122	82.4	70.3	91.5667	27.0415
SlyX	110.9	149.8	126.9	129.2	19.5517		120	103.9	92.7	105.533	13.7231		40.5	73.6	81.7	65.2667	21.8276
SmpB	99.8	101.3	97.5	99.5333	1.91398		87	99.2	85.3	90.5	7.58222		95.6	104.9	129.5	110	17.516
SodA	57.8	63.6	88.9	70.1	16.5375		123.9	111.7	86.3	107.3	19.1823		101.2	126.6	139.9	122.567	19.6627
SodB	80.5	99.3	73.2	84.3333	13.4656		91.5	95.9	107.3	98.2333	8.15434		108.4	106.8	137.1	117.433	17.0506
SodC	197.4	216.9	179	197.767	18.9527		66	53.9	96.1	72	21.7304		34.8	43.5	12.3	30.2	16.1006
SohB	131.3	89.5	103.2	108	21.3094		95.8	103.1	108.4	102.433	6.3264		115.2	82.4	71	89.5333	22.9472
SolA	96.6	86.3	92.5	91.8	5.18556		103.9	110.9	108.2	107.667	3.53034		87.6	99.5	114.6	100.567	13.5316
SoxR	101.5	102.1	74.2	92.6	15.9377		97.2	117.8	76.9	97.3	20.4502		88.4	87.9	154	110.1	38.0193
SpeA	98.8	106.3	108.2	104.433	4.97024		113.5	109.1	106.8	109.8	3.40441		77	84.6	95.8	85.8	9.45727
SpeC	95.9	106.7	64	88.8667	22.2019		96.2	101.7	79	92.3	11.8419		109.1	101.9	145.4	118.8	23.3159
SpeD	95.3	225.5	114.3	145.033	70.3307		83.3	75.5	72.6	77.1333	5.53384		72.9	80	80.6	77.8333	4.28291
SpeE	120.2	129.8	131.6	127.2	6.12862		96	85.9	86.2	89.3667	5.74659		73.5	88.1	88.7	83.4333	8.60775
SpeG	148.9	125.1	183.5	152.5	29.366		85.5	57.5	70.4	71.1333	14.0144		68.9	79	81.2	76.3667	6.55922
SpoT	106.7	103.5	130.1	113.433	14.5222		109.6	103.8	86	99.8	12.298		60.2	100.2	99.9	86.7667	23.0079
SppA	104.6	148.1	103.1	118.6	25.5588		103.7	99.5	105	102.733	2.8746		90.2	78.4	67.2	78.6	11.5013
Spy	94.1	123.8	115.6	111.167	15.3383		78.8	82.5	122.1	94.4667	24.0026		114.7	104.1	64.2	94.3333	26.629
Sra	99.7	86.8	80.2	88.9	9.91817		84.8	67.8	113.4	88.6667	23.0446		153.9	106.8	106.7	122.467	27.2221
SrkA	128.7	60.4	135.4	108.167	41.5026		186.5	168.7	126.5	160.567	30.8158		30.4	30.5	32.8	31.2333	1.35769
SrlA	44.9	45.4	58.6	49.6333	7.76938		163.2	314.6	154.2	210.667	90.1213		10.5	32	76.7	39.7333	33.7707
SrlB	54.1	54.4	47.2	51.9	4.07308		163.2	244.8	183.6	197.2	42.466		20.4	37.2	95.1	50.9	39.1892
SrlD	47.2	50.7	42.3	46.7333	4.2194		155.3	242.7	221	206.333	45.5085		18.7	30.2	91.8	46.9	39.3074
SrlE	61.3	61.3	69.8	64.1333	4.90748		171.9	190	206.5	189.467	17.3062		16	27.5	95.7	46.4	43.0805
SrlR	93.9	144.8	80.5	106.4	33.9236		86.8	109.1	106.8	100.9	12.265		81.4	70.3	126.4	92.7	29.7081
SrmB	104.6	122.7	103	110.1	10.9412		95.4	84.8	101.1	93.7667	8.27184		94.2	75	119.2	96.1333	22.1633
Ssb	96	105.4	88	96.4667	8.70938		102.2	110.9	99.2	104.1	6.07701		85.7	100.8	111.8	99.4333	13.1036
SseA	97.9	137.2	137.4	124.167	22.7478		119.9	102.5	103.1	108.5	9.87725		62.4	64.8	74.8	67.3333	6.57673
SseB	155.9	30.6	201	129.167	88.2895		140.4	134	31.2	101.867	61.2827		30.7	139.5	36.7	68.9667	61.1573
SspA	115.3	97	121	111.1	12.5391		92.6	99.7	103.3	98.5333	5.44457		101	98.7	71.5	90.4	16.4082
SspB	102.6	127.1	156.9	128.867	27.1931		78.8	68.9	97.9	81.8667	14.7412		124.5	81.7	61.5	89.2333	32.1685
SstT	22.7	22.2	21	21.9667	0.873689		125.6	121.9	111.3	119.6	7.42226		164.6	174.8	135.9	158.433	20.1699
SthA	45.3	56.4	55.2	52.3	6.0918		100.4	85.8	96.4	94.2	7.54453		157.3	139.1	164.1	153.5	12.9259
StpA	74.5	103	75.7	84.4	16.1192		87.8	90.8	67.6	82.0667	12.618		115.9	145.2	139.6	133.567	15.5539
SucA	44.8	50.8	46.1	47.2333	3.15647		87.1	83	94.1	88.0667	5.61278		148.8	145.3	200	164.7	30.6207
SucB	46.6	48.7	57.7	51	5.89661		92.7	96.4	90.6	93.2333	2.93655		133.3	143.2	190.9	155.8	30.7979
SucC	46.1	47.1	41.6	44.9333	2.92973		88.5	88	91.9	89.4667	2.12211		164.3	146.4	185.9	165.533	19.7789
SucD	41.6	42	44.8	42.8	1.74356		82.1	96.8	91.7	90.2	7.46391		148	139.6	213.4	167	40.4025
SufA	79.1	85.7	99.3	88.0333	10.3002		89.6	118.1	84.9	97.5333	17.9656		123.7	109.5	110.1	114.433	8.03077
SufB	92.8	87.4	81.7	87.3	5.55068		102.5	114	110.1	108.867	5.84836		125.6	112.2	73.7	103.833	26.9426
SufC	102.2	91.3	118	103.833	13.4247		112.7	60.8	88.8	87.4333	25.977		92.4	115.3	118.5	108.733	14.2353
SufD	97.7	74.5	169.6	113.933	49.5847		108.6	79.3	103.1	97	15.5734		145.7	72.5	49.2	89.1333	50.3544
SufS	89	143.6	78.7	103.767	34.879		123.7	79.9	92.7	98.7667	22.5214		117.1	71.7	103.7	97.5	23.3264
SuhB	115.1	115.8	116.4	115.767	0.650641		109	104.1	103.7	105.6	2.95127		87.6	79.8	68.5	78.6333	9.6033
SurA	107.4	103.4	113.6	108.133	5.13939		87.4	90.8	93.3	90.5	2.96142		115.8	103	85.3	101.367	15.3155
SurE	97.4	155.8	100.1	117.767	32.9655		89.7	94.3	101.1	95.0333	5.73527		92.9	119	49.8	87.2333	34.9463
Syd	6.2	66.3	122.7	65.0667	58.2598		106.1	150	120.2	125.433	22.413		167.8	108.4	52.2	109.467	57.8074
TabA	96.2	56	68.6	73.6	20.5611		104.1	79	124.7	102.6	22.8869		165.9	121.1	84.3	123.767	40.8653
TadA	97.4	147.1	140.9	128.467	27.0825		74.2	57.2	71.8	67.7333	9.20072		84.6	117.2	109.6	103.8	17.0564
Tag	71.3	112.4	92.1	91.9333	20.5505		42.5	35.3	169.9	82.5667	75.7185		144.6	110.2	121.6	125.467	17.5229
TalA	108.7	101.4	105.5	105.2	3.65923		72.5	76.5	77.9	75.6333	2.80238		117.6	118.2	121.8	119.2	2.27156
TalB	106	108.5	114	109.5	4.09268		105.4	86.7	107.1	99.7333	11.3192		85.3	88.8	98.3	90.8	6.72681
Tam	91	92.6	64.4	82.6667	15.8396		62.9	107.9	96.1	88.9667	23.3327		167	142.4	75.5	128.3	47.3516
TamB	124.2	40.1	40.3	68.2	48.4975		137.1	37.7	152.4	109.067	62.277		142.4	206.8	19	122.733	95.4321
Tap	86.4	107.8	86	93.4	12.4724		94.2	114.2	85.7	98.0333	14.6316		127.9	118.1	79.7	108.567	25.475
TapT	125.5	86.4	102.6	104.833	19.6454		107	71.9	130.6	103.167	29.5372		92.5	75.5	108	92	16.2558
Tar	94.8	92.3	102.9	96.6667	5.54106		90.2	101.6	94	95.2667	5.8046		108	119.2	97.1	108.1	11.0503
Tas	105.2	90.5	109.5	101.733	9.9631		86.7	75.7	93.2	85.2	8.8459		97.5	88.8	152.8	113.033	34.7126
TatA	101.9	108.8	95.8	102.167	6.5041		81.7	81.6	141.5	101.6	34.5544		89.2	98.7	100.8	96.2333	6.18088
TatB	97.3	100	99.9	99.0667	1.5308		111.3	110.2	125.2	115.567	8.36082		99.1	79.2	77.7	85.3333	11.9459
TatC	93.6	102.2	115.5	103.767	11.0337		83.5	100.9	140.6	108.333	29.2668		86.1	94.6	83.1	87.9333	5.96518
TatD	120.4	196.6	122.5	146.5	43.4006		102	82	86.6	90.2	10.4747		78.1	45.5	66.4	63.3333	16.5149
TcdA	99.8	134.9	133.7	122.8	19.9276		114.6	87.2	75.4	92.4	20.1107		89.5	61.5	103.5	84.8333	21.3854
TcyJ	61.3	84.1	84.8	76.7333	13.3702		101.5	86.8	112.2	100.167	12.7524		131.2	122.5	115.6	123.1	7.81729
TcyL	82.6	46.9	61.8	63.7667	17.9311		110.4	93.7	102.3	102.133	8.35125		171.3	127.3	103.7	134.1	34.3092
TcyN	69.5	19.6	99.7	62.9333	40.4517		171.3	37.7	103.7	104.233	66.8016		191	132.2	75.5	132.9	57.7532
TcyP	65	56.4	58.5	59.9667	4.48367		47.9	43.7	40.7	44.1	3.61663		238.5	168.9	180.4	195.933	37.3096
TdcB	116	337.2	224.3	225.833	110.608		0	139	83.4	74.1333	69.9618		0	0	0	0	0
TdcC	99.9	184.4	108.1	130.8	46.5997		83.3	106.1	87.7	92.3667	12.0952		84.1	50.5	95.9	76.8333	23.5562
TdcE	112.1	126.6	143.7	127.467	15.8178		97.8	132	0	76.6	68.5061		81	116.1	90.6	95.9	18.1403
Tdh	122.7	130.8	140.7	131.4	9.01499		91.3	101.1	91.8	94.7333	5.51936		73.5	63.4	84.8	73.9	10.7056
Tdk	105	93.7	82	93.5667	11.5006		93.9	86.9	88.1	89.6333	3.74344		124.4	126.3	99.8	116.833	14.7819
TehB	75.5	91.5	98.6	88.5333	11.8323		103.2	98.9	118.1	106.733	10.0759		94.2	119.8	100.3	104.767	13.3717
TesA	113.6	135.9	115.7	121.733	12.3135		131.3	98	109.9	113.067	16.8743		41.9	71.9	81.9	65.2333	20.8167
TesB	100.9	116	72.8	96.5667	21.9236		82.3	121.6	101.2	101.7	19.6548		77.6	88.3	139.5	101.8	33.0846
Tgt	126.4	122.6	111.3	120.1	7.8543		98.8	97.1	97.5	97.8	0.888819		78.8	86.6	80.8	82.0667	4.05134
ThiB	85.4	133.2	86.5	101.7	27.2853		88.9	90.2	80.2	86.4333	5.43722		68.4	131.6	135.6	111.867	37.6963
ThiD	90.9	66.1	113.8	90.2667	23.8563		110.5	144	107	120.5	20.4267		103.6	56.6	107.5	89.2333	28.3285
ThiI	122.4	104	110	112.133	9.38367		107.9	86	90.9	94.9333	11.4936		86.4	97.1	95.3	92.9333	5.72917
ThiL	109.7	100.2	108.7	106.2	5.22015		97.5	98.9	89.2	95.2	5.24309		115.8	67.2	112.8	98.6	27.2345
ThiM	112.7	81.3	95.7	96.5667	15.7179		148.3	57	138.1	114.467	50.0282		68.2	56.8	141.9	88.9667	46.1946
ThrA	69.8	56.4	60.5	62.2333	6.8661		102.6	89.9	92.2	94.9	6.76683		135.1	138.7	154.7	142.833	10.4333
ThrB	69.5	48.1	75.5	64.3667	14.4032		111.4	95.3	90.1	98.9333	11.1051		148	103	159.1	136.7	29.7081
ThrC	63.6	92.6	55.2	70.4667	19.6228		109.9	103.9	79.7	97.8333	15.9879		114.5	119.6	161.1	131.733	25.5598
ThrS	105	102.3	119.5	108.933	9.25005		100.2	104	92.2	98.8	6.02329		90.4	91.1	95.4	92.3	2.7074
ThyA	89.8	97.5	100.6	95.9667	5.56088		107.4	98.2	90	98.5333	8.70479		121.5	87.9	107.1	105.5	16.857
Tig	107	111.9	108.1	109	2.57099		103.7	108.9	105.3	105.967	2.66333		82.7	89	83.4	85.0333	3.45302
TilS	68	188.4	61.8	106.067	71.3701		70.4	72.1	54.9	65.8	9.47787		84.7	191	108.7	128.133	55.7509
TktA	101.9	116.9	103.9	107.567	8.14453		109.2	108.3	90.5	102.667	10.5462		80	83.4	106.1	89.8333	14.1896
TktB	148	99.1	113.9	120.333	25.0767		95.4	87.9	78.2	87.1667	8.62342		81.4	85	111	92.4667	16.151
TldD	98.5	103.8	114.9	105.733	8.36919		102.5	100.2	94.4	99.0333	4.17413		96.1	98.9	90.7	95.2333	4.16813
Tmk	102.8	146.4	96.4	115.2	27.2088		86.4	87.3	84.8	86.1667	1.26623		89	86.3	120.4	98.5667	18.9564
TnaA	73.6	89.4	101.2	88.0667	13.8482		116.8	135.5	153.5	135.267	18.3511		70.5	72.1	87.4	76.6667	9.3297
TolA	115.5	78.5	99.3	97.7667	18.5476		114.4	123.8	104	114.067	9.90421		69.5	94.3	100.7	88.1667	16.4795
TolB	98.5	120	88.1	102.2	16.2687		96	84.3	97.1	92.4667	7.09389		90	98.9	127.1	105.333	19.3686
TolC	126.9	126.6	131	128.167	2.45832		77.7	84.2	76.2	79.3667	4.25245		100.6	67.8	109.1	92.5	21.8089
TolQ	127.8	109.6	113.5	116.967	9.58245		83	71.4	130.2	94.8667	31.1444		92.2	92.5	79.9	88.2	7.18958
TolR	124.5	108.2	108	113.567	9.46907		107.5	97.3	100.7	101.833	5.19359		65.7	92.1	95.9	84.5667	16.4491
TonB	109.3	90.9	100.3	100.167	9.20072		129.4	73	111.3	104.567	28.7966		63.3	94	128.5	95.2667	32.6185
TopA	122.2	109.5	113.3	115	6.51844		100.3	101.4	92.6	98.1	4.79479		86.4	91.3	83	86.9	4.17253
TopB	132.6	79.8	143.2	118.533	33.9602		105.7	105.8	104.3	105.267	0.83865		95	89.3	44.4	76.2333	27.7154
TorR	0	0	0	0	0		0	0	0	0	0		0	0	0	0	0
TorS	0	138.6	190.5	109.7	98.4833		120.8	85.2	170.3	125.433	42.7388		73.9	0	120.8	64.9	60.9008
TpiA	70.2	85.7	78.3	78.0667	7.75263		90.9	115.1	92.2	99.4	13.6121		124.9	122.7	119.9	122.5	2.50599
Tpx	86.2	84.1	74.6	81.6333	6.18088		101	112.1	96.3	103.133	8.11316		116.8	100.4	128.6	115.267	14.1624
TraE	107.6	114.2	88.1	103.3	13.5709		78.8	122.7	99.1	100.2	21.9707		64	108.1	117.5	96.5333	28.564
TreA	76.9	79.8	62.6	73.1	9.20815		63.8	52.7	92.3	69.6	20.4272		189.6	155.2	127.1	157.3	31.3029
TreB	69.1	111.2	119.1	99.8	26.8788		119.1	86.4	133.2	112.9	24.0081		84.1	73.5	104.2	87.2667	15.5931
TreC	76.3	91.5	105.7	91.1667	14.7028		121.7	123.9	121.2	122.267	1.43643		89.8	89.2	80.7	86.5667	5.08953
TreF	178.1	43.4	67.3	96.2667	71.8702		118.4	164.9	68.4	117.233	48.2606		81.7	143.5	34.3	86.5	54.758
TreR	97.5	103.8	99	100.1	3.2909		101.4	88.7	61.9	84	20.1651		79.6	162.6	105.5	115.9	42.4661
Trg	91.7	99.8	98.3	96.6	4.30929		104.5	114.5	103.2	107.4	6.18304		87.9	108.9	91.2	96	11.2929
TrhO	89.3	122.1	91.2	100.867	18.4131		96.2	95.6	109.4	100.4	7.8		117.6	105.1	73.6	98.7667	22.6734
TrhP	102.9	126.1	110.6	113.2	11.8165		80.4	100.3	88.2	89.6333	10.0271		87.1	95.8	108.7	97.2	10.8678
TrkA	113.1	89	134.6	112.233	22.8124		71.4	93.1	101.8	88.7667	15.6564		103.2	83.8	110	99	13.5956
TrmA	129.5	128	103.4	120.3	14.655		95.6	99.9	95.9	97.1333	2.40069		82.9	90.6	74.1	82.5333	8.25611
TrmB	113.7	94.1	134	113.933	19.951		100.9	82.4	100.9	94.7333	10.681		72.4	77.9	123.6	91.3	28.1075
TrmD	105.5	90.1	138.8	111.467	24.8922		90.8	79.8	118.2	96.2667	19.7751		66.5	115.2	95.1	92.2667	24.4733
TrmH	103.1	119.8	106.3	109.733	8.8636		97.4	105.4	89.1	97.3	8.15046		93.4	102.7	82.8	92.9667	9.95707
TrmJ	93.8	102.6	118	104.8	12.2491		103.5	95.6	89.1	96.0667	7.21133		89.6	106.7	101.1	99.1333	8.71799
TrmL	135.8	103.9	136.5	125.4	18.6228		94.8	97.6	92.4	94.9333	2.60256		89.2	98.5	51.2	79.6333	25.0592
TrmO	0	106.2	89.5	65.2333	57.1075		126.6	177.7	128.8	144.367	28.8885		159.4	111.8	0	90.4	81.8264
TrpA	82.1	70.4	63.7	72.0667	9.31254		110	99.8	90.7	100.167	9.65522		127.5	116.4	139.4	127.767	11.5023
TrpB	69.9	94.2	66.6	76.9	15.0728		100	112.7	96.7	103.133	8.44768		131.2	115.6	112.9	119.9	9.87877
TrpC	85.5	66.5	72	74.6667	9.77667		127.6	161.6	77.9	122.367	42.0947		136.7	79.7	92.5	102.967	29.9067
TrpR	106.8	87.7	92.3	95.6	9.96845		109	105.8	98	104.267	5.65803		91	88.3	121.1	100.133	18.2078
TrpS	84.8	95.3	100.5	93.5333	7.99771		100.1	105.7	98.3	101.367	3.85919		99	105.2	111.2	105.133	6.10027
TruA	119.5	99.7	117.4	112.2	10.8761		89.2	92.3	115.5	99	14.3732		82.7	93.8	89.9	88.8	5.63116
TruB	123.3	90.4	124	112.567	19.2001		103.7	113.2	94.4	103.767	9.40018		90.8	76.6	83.7	83.7	7.1
TruC	102.6	91.6	125.7	106.633	17.4041		101	73.6	108.7	94.4333	18.4484		97.6	89.6	109.5	98.9	10.0135
TruD	102	63.4	116.7	94.0333	27.5286		105.1	93	96.9	98.3333	6.17603		132.1	103.1	87.7	107.633	22.5445
TrxA	97.2	60.6	106.3	88.0333	24.1897		111.6	77.6	115.7	101.633	20.9142		115.4	111.1	104.5	110.333	5.49029
TrxB	91	107.5	96.6	98.3667	8.39067		99.3	113.9	97.3	103.5	9.06201		92.3	98.5	103.5	98.1	5.6107
TrxC	82.8	83.8	74.8	80.4667	4.93288		86.4	88.3	112.4	95.7	14.4938		111.7	116.7	143.1	123.833	16.8717
TsaB	128.6	86.7	104.6	106.633	21.0239		106.7	100.4	88.6	98.5667	9.18822		80.2	106.7	97.5	94.8	13.4547
TsaC	136.1	91.1	118.3	115.167	22.663		85.8	87.3	81.5	84.8667	3.01054		102.3	94.1	103.5	99.9667	5.11599
TsaD	119.7	75.6	109.9	101.733	23.1565		119.1	72.8	106.5	99.4667	23.9379		106.6	117.7	72.2	98.8333	23.7235
TsaE	104.7	101.2	86	97.3	9.94133		109.5	88	94.8	97.4333	10.9892		120.3	100.8	94.6	105.233	13.4113
Tsf	100.8	106.5	96.2	101.167	5.15978		105.4	110.6	105.2	107.067	3.06159		87.3	100.2	87.9	91.8	7.2808
Tsr	108.6	111.7	117.7	112.667	4.62637		86	90.2	78.4	84.8667	5.98108		98.3	112.6	96.4	102.433	8.85569
Tsx	75.7	53.1	66.4	65.0667	11.3588		115.9	150.9	137.8	134.867	17.6834		132.7	94.4	73.1	100.067	30.2014
TtcA	120.2	109	118.4	115.867	6.01443		100.9	104	93	99.3	5.67186		89.5	93.3	71.7	84.8333	11.5314
TufA	101.3	102.8	99.5	101.2	1.65227		109.6	109.4	104	107.667	3.177		93.6	81.4	98.5	91.1667	8.80587
Tus	112.8	19.9	120.1	84.2667	55.8625		84.6	92	129.4	102	24.0158		162.8	104.3	74.1	113.733	45.0962
TusA	121.7	90	87.6	99.7667	19.0327		93	107	93.7	97.9	7.8886		100.2	104.9	102	102.367	2.37136
TusB	68.5	118.8	108.3	98.5333	26.5342		119.6	92.3	64.9	92.2667	27.35		134.6	101.1	92	109.233	22.4344
TusC	74.5	55.3	86.1	71.9667	15.5555		108.8	144.1	146.5	133.133	21.1074		137.8	28.5	118.3	94.8667	58.2963
TusD	96.3	106	48.1	83.4667	31.0101		110.7	91.4	107.3	103.133	10.3026		113.7	98.4	128.1	113.4	14.8523
TusE	89.2	62.6	125.4	92.4	31.5221		106	122.8	93.2	107.333	14.845		117.8	87	96.1	100.3	15.8237
TyrA	88.8	105	98.1	97.3	8.12958		83.8	118.3	94.4	98.8333	17.6721		85.2	98.2	128.1	103.833	21.9978
TyrB	89.7	90.8	107.9	96.1333	10.2051		113.6	120.5	116.1	116.733	3.49333		69.2	91.7	100.5	87.1333	16.142
TyrR	120.8	97.4	104.1	107.433	12.0509		98.1	91.7	103.1	97.6333	5.71431		108.9	97.7	78	94.8667	15.6436
TyrS	118.3	117.7	110.6	115.533	4.28291		92.2	89.8	97.2	93.0667	3.77536		85	91	98.2	91.4	6.60908
UacR	29	281.8	33.7	114.833	144.616		40.8	286.2	113.3	146.767	126.077		36.2	27.4	51.6	38.4	12.2491
UbiA	85.4	71.6	118.2	91.7333	23.9369		134.1	100.7	115	116.6	16.7574		98.3	101.3	75.3	91.6333	14.2244
UbiB	84.7	142.1	71.8	99.5333	37.4238		81	108.6	107.4	99	15.6		111.1	94.1	99.4	101.533	8.69847
UbiC	100.5	79.5	98.7	92.9	11.6396		109.8	116	122.3	116.033	6.25007		110.3	81.3	81.5	91.0333	16.6857
UbiD	90.8	92	79.1	87.3	7.12671		121.7	98.1	65	94.9333	28.4823		111.4	137	105	117.8	16.9328
UbiE	89.4	101.6	102.8	97.9333	7.4144		96.6	105.9	92	98.1667	7.0812		106.9	108.2	96.7	103.933	6.29788
UbiF	93.8	77.6	89.8	87.0667	8.4388		94.4	102.3	92.7	96.4667	5.12282		109.1	121.5	118.7	116.433	6.50333
UbiG	84.8	93.4	100.8	93	8.0075		99.4	85.4	105.1	96.6333	10.1372		112	86.1	133.1	110.4	23.5408
UbiH	121.7	100.4	143.7	121.933	21.6509		85.5	94.4	78.2	86.0333	8.11316		92.4	91.2	92.4	92	0.69282
UbiI	130.6	99.7	86.2	105.5	22.7612		84	58.8	125.6	89.4667	33.7339		108.9	92	114.1	105	11.5547
UbiJ	88.3	66.1	117.8	90.7333	25.9358		99.2	103.2	97.1	99.8333	3.09892		130.6	101.4	96.3	109.433	18.5074
UbiK	110.8	65.9	107	94.5667	24.8987		110.9	118.8	94.7	108.133	12.2859		72.6	97	122.2	97.2667	24.8011
UbiT	123.3	69.8	113.8	102.3	28.5438		48.6	31.8	25.7	35.3667	11.8593		196	157	134.1	162.367	31.297
UcpA	131.8	112.7	158.1	134.2	22.795		112.5	86.9	98	99.1333	12.8376		70.8	67.9	61.3	66.6667	4.86861
Udk	132.2	136.5	118.1	128.933	9.62514		94	88.2	99.7	93.9667	5.75007		76.5	75.3	79.5	77.1	2.16333
Udp	122.3	92.8	202.5	139.2	56.7691		113	117.5	112.7	114.4	2.68887		43.7	38.8	56.7	46.4	9.25041
UgpB	41.9	49.3	37.2	42.8	6.1		54.4	56.4	60.1	56.9667	2.89194		225.4	189.6	185.7	200.233	21.882
UgpC	7.4	9.7	9.3	8.8	1.22882		21.7	26.9	46	31.5333	12.7954		298.6	280.4	200	259.667	52.468
UgpQ	37.7	35.1	54.7	42.5	10.6452		45.1	43	38.9	42.3333	3.15331		196.4	206.3	242.7	215.133	24.3812
UidA	83	65.3	0	49.4333	43.7157		17.9	181	200.3	133.067	100.203		106	29.2	217.2	117.467	94.5231
UidR	129.3	80.5	168.9	126.233	44.2797		141.9	120.1	96.4	119.467	22.7566		85.4	77.5	0	54.3	47.1908
UlaG	173.5	101.1	102.2	125.6	41.4863		121.5	91.2	93.2	101.967	16.9459		91.2	76.9	49.2	72.4333	21.3533
UlaR	140.6	292.1	72.5	168.4	112.408		57.8	39.8	85.7	61.1	23.1273		34.5	29.2	147.9	70.5333	67.0539
Ung	107.9	94.7	111.7	104.767	8.92263		93.5	127.5	104.6	108.533	17.3379		86.3	89.4	84.3	86.6667	2.5697
Upp	126.3	87.4	118.8	110.833	20.6374		84.4	102.2	106.7	97.7667	11.7925		97.6	90.6	86.1	91.4333	5.79511
UppP	111.4	139.4	137.6	129.467	15.6721		124.7	111.6	84.2	106.833	20.6665		75.9	62.9	52.3	63.7	11.8203
Usg	120.1	88	111.9	106.667	16.6776		87.7	110.8	78.4	92.3	16.6826		89.9	75.1	138.1	101.033	32.9426
UshA	83.3	99.8	91.2	91.4333	8.25247		89.3	95.3	77.3	87.3	9.16515		139.7	107.3	116.9	121.3	16.6421
UspA	95.2	94.4	98.5	96.0333	2.17332		131.7	90.4	94.5	105.533	22.7535		90.3	108.6	96.4	98.4333	9.3179
UspD	130.4	105.5	88.6	108.167	21.0272		104.6	106.3	72.9	94.6	18.812		126.2	87	78.5	97.2333	25.4433
UspF	134.8	89.3	173.3	132.467	42.0486		113.4	84.7	133.8	110.633	24.6666		51.2	47.3	72.2	56.9	13.3929
UspG	153.9	159.7	165.7	159.767	5.90028		96.7	69.9	98.1	88.2333	15.8926		48.1	46.1	61.8	52	8.54576
Uup	107	114.7	81.1	100.933	17.6024		105.9	102.3	90	99.4	8.33727		86.7	116.9	95.5	99.7	15.5319
UvrA	101.9	94.1	95.3	97.1	4.2		87.3	85.5	102.1	91.6333	9.10897		126.5	105.5	101.7	111.233	13.3571
UvrB	119.8	72.7	82.4	91.6333	24.8705		103.1	143.3	83.1	109.833	30.6596		103.5	89.8	102.2	98.5	7.56241
UvrC	154.8	107.4	133	131.733	23.7254		99.6	85.8	158.7	114.7	38.7248		53.7	56.5	50.5	53.5667	3.00222
UvrD	128.7	112.2	118.1	119.667	8.36082		87.3	83.8	99.8	90.3	8.4113		103.9	82.1	84	90	12.0752
UvrY	173.2	134.1	151.6	152.967	19.5858		148.7	129.5	162.9	147.033	16.7623		0	0	0	0	0
UxaA	137.7	122	147.4	135.7	12.8176		85.2	84	85.3	84.8333	0.723418		97.9	66	74.6	79.5	16.5048
UxaB	0	0	0	0	0		0	0	0	0	0		0	0	0	0	0
UxaC	122.2	124.1	116	120.767	4.23596		79.4	87.6	107.1	91.3667	14.229		76.7	85	101.9	87.8667	12.8422
UxuA	108.2	114	106	109.4	4.1328		105.9	114.2	108.5	109.533	4.24539		77	101.7	64.5	81.0667	18.9305
UxuB	90.3	99.1	114.2	101.2	12.0876		101	121	109.4	110.467	10.0426		92.6	92.7	79.7	88.3333	7.47685
UxuR	65.7	85.8	110	87.1667	22.1816		102.7	145.7	82.5	110.3	32.2782		125.2	83.6	98.8	102.533	21.0498
ValS	101.2	89.2	106.6	99	8.90618		101.8	97.9	89.5	96.4	6.2857		108.7	110.6	94.5	104.6	8.7983
Ves	63.5	74.1	48.8	62.1333	12.7052		40.1	203	80	107.7	84.9092		126.8	150.1	113.6	130.167	18.4814
WaaA	114.4	89.1	126.5	110	19.0843		108.1	90.8	108.8	102.567	10.1962		76.7	79.2	106.3	87.4	16.4155
WaaU	88.5	130.1	96.4	105	22.0932		102.9	109.4	105.2	105.833	3.29596		82.2	81.2	104.1	89.1667	12.9423
WbbI	98.7	113	95.3	102.333	9.39273		82.7	101.9	92.5	92.3667	9.60069		99.7	91.7	124.4	105.267	17.0459
WbbJ	102.7	116	78.8	99.1667	18.85		111.7	88.2	103.8	101.233	11.9584		78.8	97	122.9	99.5667	22.1618
WbbK	90.5	98.8	91.6	93.6333	4.50814		97.9	101	95.9	98.2667	2.5697		91.8	88.9	143.7	108.133	30.8357
WbbL	65.2	241.4	82.8	129.8	97.0482		65.8	85.2	86.4	79.1333	11.5626		105.8	109.5	57.9	91.0667	28.7827
WecA	104.9	123.3	154.5	127.567	25.0738		112	41.4	114.9	89.4333	41.6234		79.1	65.3	104.7	83.0333	19.9923
WecB	108.3	122.2	93.4	107.967	14.4029		89.7	93.6	92.3	91.8667	1.98578		98.8	109.3	92.5	100.2	8.48705
WecC	120.7	101.4	119.5	113.867	10.8131		94	76.6	96.7	89.1	10.9092		91	107.5	92.6	97.0333	9.09963
WecD	116	112.6	75.7	101.433	22.3505		110.1	71.1	113.7	98.3	23.6246		90.7	130.9	79.2	100.267	27.1452
WecE	110.8	97.9	120.7	109.8	11.4328		86	103.3	91.8	93.7	8.80511		111	89.4	89.1	96.5	12.5583
WecF	96.6	104.6	102.4	101.2	4.1328		86	104	97.9	95.9667	9.15442		117.3	99.4	91.9	102.867	13.05
WecG	115.8	102.3	78.4	98.8333	18.9395		110.1	90.2	105.6	101.967	10.4357		92.1	126.8	78.7	99.2	24.8236
WrbA	118.9	88.7	116.3	107.967	16.736		75.5	82.8	71.2	76.5	5.8643		125.9	113.2	107.5	115.533	9.41931
Wza	0	0	0	0	0		0	0	0	0	0		0	0	0	0	0
WzzB	97.2	109.3	84.7	97.0667	12.3005		96.4	102.7	102.2	100.433	3.5019		97.3	104.3	105.8	102.467	4.53689
WzzE	103.8	122.4	115.1	113.767	9.37141		96	101.6	92.6	96.7333	4.54459		86.1	88.3	93.9	89.4333	4.02161
XapA	0	0	0	0	0		0	0	0	0	0		0	0	0	0	0
XerC	122.6	33.4	61.1	72.3667	45.6548		142.6	96.9	47.1	95.5333	47.7647		160	37.3	199	132.1	84.3832
XerD	93.2	57.5	140.6	97.1	41.687		59.2	166.9	91.6	105.9	55.2557		97.6	83.5	110	97.0333	13.2591
XseA	119.3	131.3	114.2	121.6	8.77895		96.7	101.7	75.5	91.3	13.9097		85.3	91.2	84.9	87.1333	3.52751
XseB	91.5	144.8	90.5	108.933	31.0655		87.5	101.5	97.5	95.5	7.2111		102.7	99.4	84.6	95.5667	9.63967
XthA	107.7	86.2	87.5	93.8	12.0553		79.5	87.6	134.2	100.433	29.5219		92.5	118.5	106.3	105.767	13.0082
XylA	46.8	0	37.8	28.2	24.833		24.7	76.9	4.5	35.3667	37.36		280.2	362.7	66.6	236.5	152.811
XylB	88.1	119.1	114.9	107.367	16.8171		81.4	0	103.3	61.5667	54.4311		0	183.7	209.6	131.1	114.272
XylF	172.3	53.7	85.7	103.9	61.3589		64	122.5	70.7	85.7333	32.0166		143.6	119.4	68	110.333	38.6069
XynR	129	105.1	89.9	108	19.7107		110.3	91.1	87.5	96.3	12.2572		84.6	100.5	101.9	95.6667	9.60954
YaaA	106.5	67.5	106.6	93.5333	22.5456		100.1	108.9	108.8	105.933	5.05206		106.5	103.5	91.7	100.567	7.8239
YabI	156	91.8	110.9	119.567	32.9658		128.6	86.2	60.4	91.7333	34.4351		64.9	63.6	137.5	88.6667	42.2959
YacC	102.9	132.4	104.8	113.367	16.5107		90.6	86.6	109.1	95.4333	12.0035		94.8	105.2	73.7	91.2333	16.05
YacG	134.1	62.7	84.1	93.6333	36.6422		106.3	96.9	91.5	98.2333	7.48955		122.6	108.4	93.4	108.133	14.6018
YacL	96.4	110.8	109.7	105.633	8.01519		111.1	120.8	115.9	115.933	4.85009		91.6	36.5	107.1	78.4	37.1049
YadG	104.2	71.3	129.5	101.667	29.1826		101.5	96.8	108.4	102.233	5.83467		122.8	103	62.5	96.1	30.7365
YaeH	87.4	88	110.8	95.4	13.3402		123.8	116.3	115.1	118.4	4.71487		93.5	82.5	82.6	86.2	6.32218
YaeP	99.2	134.8	111.5	115.167	18.081		98.2	115.4	76.6	96.7333	19.4415		81.9	92.8	89.6	88.1	5.60268
YaeQ	97.9	89	172.5	119.8	45.856		97.9	78	88.3	88.0667	9.95205		114.6	105.7	56.1	92.1333	31.5215
YaeR	119.2	64.2	60.6	81.3333	32.8429		75	135.3	53	87.7667	42.6094		159	136.6	97.1	130.9	31.3412
YafC	103.4	83.6	91	92.6667	10.0047		98.4	98.8	143.7	113.633	26.0393		81.8	103.4	95.9	93.7	10.9668
YafE	149.4	132	134	138.467	9.5212		77	45.3	124.7	82.3333	39.9678		77.6	99.8	60.2	79.2	19.8484
YafJ	105.1	102.9	40.1	82.7	36.9091		104.9	135.1	96.7	112.233	20.2231		94.3	121.2	99.7	105.067	14.2304
YafV	127	25.8	92.6	81.8	51.4572		118.7	86.3	115.3	106.767	17.806		111.3	92.3	130.7	111.433	19.2003
YagE	98.3	104.9	122.8	108.667	12.6769		119.9	141.1	115.9	125.633	13.543		62.4	70.4	64.4	65.7333	4.16333
YagF	117.8	187.6	92.4	132.6	49.2954		97.2	112.5	111.4	107.033	8.53366		91.4	50.1	39.7	60.4	27.3457
YagH	118.8	0	0	39.6	68.5892		0	243.7	83.8	109.167	123.814		136.2	200	117.6	151.267	43.2168
YagU	32.9	24	42.8	33.2333	9.40443		23.6	13.4	20.4	19.1333	5.21664		244.3	301.2	197.3	247.6	52.0285
YahJ	88.8	174.4	81.9	115.033	51.5287		84.2	122.2	63.6	90	29.7274		68.1	100.5	116.3	94.9667	24.5718
YahK	112.3	81.3	130.5	108.033	24.876		74.8	87.2	121.5	94.5	24.1907		97.2	115.1	80	97.4333	17.5512
YahO	93.1	80.6	81.5	85.0667	6.97161		87.6	80.8	80.2	82.8667	4.11015		123.8	142	130.4	132.067	9.21376
YaiI	98.6	144.4	141.8	128.267	25.725		88.2	73.7	81.7	81.2	7.26292		101.5	107.1	63.2	90.6	23.8937
YaiL	79.5	131.4	98.1	103	26.2947		145.7	119.4	90.7	118.6	27.5087		79.8	75.1	80.3	78.4	2.8688
YaiW	92	114.2	99.6	101.933	11.2824		78.5	85.2	134	99.2333	30.2946		105.9	96.1	94.6	98.8667	6.13705
YajC	112.2	96.7	95	101.3	9.47787		115.7	120.4	103.9	113.333	8.50078		87.2	92.2	76.7	85.3667	7.91096
YajD	82.4	93.9	107.6	94.6333	12.616		107.4	100	98.3	101.9	4.83839		107.1	108.6	94.7	103.467	7.62911
YajG	111.9	107.9	105.2	108.333	3.37095		92.1	115.1	84.1	97.1	16.0935		94.2	71.9	117.6	94.5667	22.8522
YajL	97.8	77.4	91.3	88.8333	10.4213		95.9	122.6	84.4	100.967	19.5975		90	160.7	79.9	110.2	44.0249
YajO	107.7	101.1	115.8	108.2	7.36274		92.1	73.5	97	87.5333	12.3977		124.3	86.9	101.7	104.3	18.8351
YajQ	98.7	76.8	90.1	88.5333	11.0337		112.4	104.6	113.3	110.1	4.78435		87.6	107.3	109.3	101.4	11.9929
YbaA	263.4	345.2	221.3	276.633	63.0011		0	70.2	0	23.4	40.53		0	0	0	0	0
YbaB	75.6	93.1	118	95.5667	21.3074		112.7	118.4	107.6	112.9	5.40278		104.1	74.7	95.7	91.5	15.1433
YbaK	92.2	63.3	95.3	83.6	17.6485		71.2	61.1	40.6	57.6333	15.5918		166.4	126.6	183.3	158.767	29.1105
YbaL	110.1	68	99.8	92.6333	21.9459		107.1	88.1	110.8	102	12.1791		122.8	102.7	90.5	105.333	16.3102
YbaQ	112.4	87.9	128.1	109.467	20.2599		98.9	102.7	92.2	97.9333	5.31633		93	89.5	95.2	92.5667	2.8746
YbaY	103.8	111.7	78.9	98.1333	17.1185		82	83.8	75.8	80.5333	4.19682		157.3	131.7	75	121.333	42.118
YbbA	67.8	84.6	166.2	106.2	52.6361		104.5	127.7	186.4	139.533	42.2128		55.1	54.1	53.7	54.3	0.72111
YbbO	125.8	118.5	116	120.1	5.09215		113.2	125.7	86	108.3	20.2985		69.5	72.2	73.1	71.6	1.8735
YbcJ	93.8	91.9	116.8	100.833	13.8601		104.4	86.8	104.1	98.4333	10.0759		93.6	94.1	114.4	100.7	11.8672
YbdF	154.9	101.6	130.5	129	26.6816		58.6	149.2	0	69.2667	75.1698		87.5	99.3	118.4	101.733	15.5931
YbdG	144.6	39.3	144.3	109.4	60.7086		119.7	41.7	78.9	80.1	39.0138		71.3	133.5	126.8	110.533	34.1418
YbdK	79.4	64.3	73	72.2333	7.57914		75.3	90.7	74.1	80.0333	9.25707		190	135.4	117.7	147.7	37.6867
YbdR	289.5	223.1	209.8	240.8	42.6965		61.4	13.8	49	41.4	24.6933		16.5	12.2	24.7	17.8	6.35059
YbeD	114	84.2	100	99.4	14.9091		78.1	79.9	123.2	93.7333	25.5347		118.7	99.6	102.2	106.833	10.3587
YbeL	118.4	147.3	133	132.9	14.4503		133.1	88.4	103.5	108.333	22.7386		60.6	44.7	71	58.7667	13.2455
YbeY	86.4	109.5	98.3	98.0667	11.5518		80.4	96.7	88.2	88.4333	8.1525		83.6	119.4	137.5	113.5	27.4301
YbeZ	95.5	86.9	79.9	87.4333	7.81366		109.4	118	88	105.133	15.4484		107.4	109.3	105.6	107.433	1.85023
YbfA	188.4	119	207.3	171.567	46.4946		111.9	87	73.7	90.8667	19.3913		27.3	63.3	22.1	37.5667	22.4369
YbfE	98.8	110	90.7	99.8333	9.69141		88.5	139.7	95.6	107.933	27.7388		77.2	88.6	110.9	92.2333	17.1413
YbfF	98.8	109.9	77.3	95.3333	16.5742		99.6	100.4	86.6	95.5333	7.74683		120	101.7	105.7	109.133	9.62098
YbgA	58.9	32	61.5	50.8	16.3331		114.8	77.3	80.8	90.9667	20.7143		109.2	206.3	159.1	158.2	48.5563
YbgC	88	92.4	112.4	97.6	13.0046		88.4	97.7	85.1	90.4	6.53376		123.7	98.9	113.3	111.967	12.4536
YbgI	99.4	107.5	83.9	96.9333	11.9918		96.3	96	109.2	100.5	7.53591		99.6	99.3	108.8	102.567	5.40031
YbgS	208.6	179.7	238.3	208.867	29.3009		51.6	43.2	81.4	58.7333	20.0742		40.7	40.7	15.9	32.4333	14.3183
YbhA	92	118.1	82.8	97.6333	18.3118		109.8	117.3	107.1	111.4	5.28488		91.8	81.4	99.7	90.9667	9.17842
YbhB	145	96.7	130.5	124.067	24.7843		91.3	64.4	48.8	68.1667	21.4989		153.5	81.7	88.2	107.8	39.7106
YbhC	102.6	99.5	87.4	96.5	8.03181		100.4	112.3	103.1	105.267	6.23886		98.4	95.7	100.8	98.3	2.55147
YbhF	0	171.2	0	57.0667	98.8424		175.7	168.9	171.6	172.067	3.42394		212.6	0	0	70.8667	122.745
YbhG	109.3	90.4	105.9	101.867	10.0749		123.4	122.1	101.9	115.8	12.0553		75.9	87.1	84.1	82.3667	5.7977
YbhK	110	135.7	121.2	122.3	12.8853		84.5	103.3	75.5	87.7667	14.185		68.5	112.9	88.4	89.9333	22.2397
YbiB	105.7	108.8	95.9	103.467	6.73375		95.5	104.6	87.7	95.9333	8.45833		93	84.6	124.2	100.6	20.8653
YbiS	113.1	97.4	111.7	107.4	8.6885		105.6	121.7	103.6	110.3	9.92321		86.4	85	75.4	82.2667	5.98777
YbiT	113.8	95	103.5	104.1	9.41435		101.3	115	92.3	102.867	11.4308		98.9	94.8	85.2	92.9667	7.0316
YbiU	68.6	88.2	86.6	81.1333	10.8836		103.8	83.8	86.2	91.2667	10.9203		90.8	125.3	166.7	127.6	38.0022
YbiV	93.5	130.4	96.1	106.667	20.5947		91.2	101.7	89.1	94	6.75056		109.2	95.7	93.1	99.3333	8.64311
YbiX	102.8	99.8	161.3	121.3	34.6735		85.1	120.2	129.2	111.5	23.3017		54.1	94.1	53.4	67.2	23.2987
YbjD	61	67.5	86.9	71.8	13.4748		130.1	0	105.6	78.5667	69.1347		166.5	143.3	139.2	149.667	14.7215
YbjI	22.4	173.4	17.8	71.2	88.5377		24.9	192.6	53	90.1667	89.8156		104.1	26.8	285	138.633	132.519
YbjL	126.3	83.2	133.4	114.3	27.1663		79.4	118.6	64	87.3333	28.1513		104.5	104.7	85.7	98.3	10.9124
YbjM	0	0	0	0	0		0	0	0	0	0		0	0	0	0	0
YbjN	82.6	0	69.3	50.6333	44.3511		138.1	95	109.1	114.067	21.9751		135.5	149.3	121.2	135.333	14.0507
YbjP	28	57.2	29.6	38.2667	16.4163		102.4	100.4	111.8	104.867	6.08714		126.3	180.5	163.8	156.867	27.7572
YbjS	113.3	69.4	144.4	109.033	37.6816		69.8	113	89.1	90.6333	21.6408		94.7	127	79.2	100.3	24.3871
YbjX	316.2	232.6	347.2	298.667	59.2778		4	0	0	1.33333	2.3094		0	0	0	0	0
YcaC	117.4	151.4	95.6	121.467	28.1214		93.2	97.7	82.8	91.2333	7.64221		103.5	77.8	80.5	87.2667	14.1231
YcaL	118.2	163.3	41.8	107.767	61.4183		159.4	100.1	123	127.5	29.905		0	0	194.2	64.7333	112.121
YcaO	125.4	125.6	121.8	124.267	2.13854		103.1	119.9	68.6	97.2	26.154		74.3	82.2	79.1	78.5333	3.98037
YcaQ	82.8	108.8	172.8	121.467	46.3177		89.7	88.2	42.5	73.4667	26.8284		114.2	100.7	100.4	105.1	7.88226
YcaR	97.5	111.2	77.3	95.3333	17.0535		145.6	106.9	103	118.5	23.5502		89.2	87	82.2	86.1333	3.57957
YcbB	31.6	139.4	67	79.3333	54.9481		101.5	61.9	113	92.1333	26.8068		132.3	129.9	123.4	128.533	4.60471
YcbX	98	124.6	98.3	106.967	15.2717		104.2	101.6	89.5	98.4333	7.84496		89.6	86.9	107.3	94.6	11.0811
YcbZ	123.2	90.1	85.1	99.4667	20.7052		111.7	120	102.2	111.3	8.90674		94.1	95	78.6	89.2333	9.21973
YccF	108.7	112.1	81.2	100.667	16.9441		82.5	115.6	108.9	102.333	17.4998		96.7	90.5	103.9	97.0333	6.70622
YccJ	109	139.9	132.1	127	16.0689		68.8	30.5	62	53.7667	20.4344		119.1	102.5	136.1	119.233	16.8004
YccS	128.6	80.4	113.5	107.5	24.6538		58.2	102.1	158.3	106.2	50.1758		135.5	70.3	53.1	86.3	43.4677
YccU	112.7	70.5	85.5	89.5667	21.3919		115	55.7	105.5	92.0667	31.8506		167.1	124.3	63.7	118.367	51.9547
YccX	84.7	136.4	151.9	124.333	35.1875		87.3	39.1	76.8	67.7333	25.3469		134.4	143.8	45.8	108	54.0714
YcdX	99.4	67	98.2	88.2	18.3695		79.4	126.4	74.4	93.4	28.688		136.6	165.2	53.4	118.4	58.0796
YcdY	68.4	61.5	95.2	75.0333	17.8023		72.3	120.7	101.1	98.0333	24.3453		135.3	123.2	122.3	126.933	7.25971
YceB	63.4	132.6	57.2	84.4	41.8574		111.5	139.8	91.6	114.3	24.2217		75.8	98	130.3	101.367	27.4055
YceD	132.6	105.8	93.3	110.567	20.0789		94.4	92.7	78.1	88.4	8.96047		104.6	99.3	99.3	101.067	3.05996
YceF	75.3	135.2	64.1	91.5333	38.2288		84.2	123.7	106.4	104.767	19.8006		117.7	104.9	88.5	103.7	14.6369
YceH	102.6	86.3	116.2	101.7	14.9703		108.3	109.2	104.7	107.4	2.38118		105.5	84.6	82.7	90.9333	12.6508
YceI	81.4	78.9	63.5	74.6	9.69381		135.1	140.6	111.3	129	15.5734		97	92.5	99.6	96.3667	3.59212
YceM	102.5	95.7	97.5	98.5667	3.52326		123.2	113.4	98	111.533	12.7033		76.5	93.1	100.2	89.9333	12.1632
YcfH	96.6	108.9	136.2	113.9	20.268		82.5	86.6	103	90.7	10.8476		119.5	84.2	82.5	95.4	20.8885
YcfP	98.2	90.6	102.3	97.0333	5.93661		97.3	98.3	83.7	93.1	8.15598		122.1	110.7	96.9	109.9	12.619
YcfS	82.8	58.1	91	77.3	17.1257		234.2	229.3	173	212.167	34.0077		25.6	6.1	0	10.5667	13.3717
YcgB	32.9	63.4	51.2	49.1667	15.3513		144	141.4	106.2	130.533	21.1133		126	99.3	135.5	120.267	18.7687
YcgJ	100	65.9	83.4	83.1	17.052		84.9	122.2	106.7	104.6	18.7385		148.5	107.7	80.6	112.267	34.1796
YcgL	100.4	78.5	78.3	85.7333	12.7021		89.1	92.9	134.1	105.367	24.9562		110.2	102.3	114.1	108.867	6.01193
YcgM	84.3	104.8	101.1	96.7333	10.9254		81.7	107.6	157	115.433	38.2563		78.5	82.2	102.8	87.8333	13.0929
YcgN	135.9	123.3	112.8	124	11.5659		74.7	118.4	81.2	91.4333	23.5789		94.7	78.5	80.6	84.6	8.80965
YcgR	88.6	93.5	92.6	91.5667	2.60832		92.6	82.7	92.9	89.4	5.80431		115.3	131	110.8	119.033	10.6049
YchA	165.3	116.1	114.5	131.967	28.8786		112.7	77.3	91.5	93.8333	17.815		96.9	97	28.6	74.1667	39.4619
YchF	95.9	114.8	104.9	105.2	9.45357		90.7	98.7	92.3	93.9	4.2332		101.1	109.2	92.4	100.9	8.40179
YchJ	119.9	98.6	119	112.5	12.0462		106.7	121.6	60.8	96.3667	31.6898		80.7	118	74.8	91.1667	23.4248
YchN	26.5	32.9	25.8	28.4	3.9128		44	44.5	140	76.1667	55.2819		58.1	164.4	363.7	195.4	155.141
YciA	133.7	82.9	113.5	110.033	25.5768		78.1	79.2	128.3	95.2	28.6707		112.2	97.5	74.6	94.7667	18.9484
YciC	123.8	91.8	95	103.533	17.6242		134.6	123.8	81.2	113.2	28.234		84.8	94.6	70.4	83.2667	12.1726
YciE	205.3	134.1	194.2	177.867	38.3072		73.3	54.9	93.9	74.0333	19.5103		59.3	46.6	38.4	48.1	10.5304
YciF	175.1	171.7	231.2	192.667	33.4141		59.9	56.8	74.9	63.8667	9.68005		28.5	54.6	47.2	43.4333	13.4515
YciH	130.3	91.3	121.3	114.3	20.4206		96.6	57.6	119.3	91.1667	31.2068		92.8	77.6	113.3	94.5667	17.9154
YciI	104.1	84.6	112	100.233	14.1033		120.2	58.9	147.9	109	45.5448		94.6	109.5	68.3	90.8	20.8612
YciK	84.5	100.1	87.6	90.7333	8.25853		131.2	125.2	113.5	123.3	9.00167		82.5	72.7	102.6	85.9333	15.2428
YciN	113.6	111.7	108.7	111.333	2.47049		108.5	122.2	88.2	106.3	17.1064		86.1	78.3	82.6	82.3333	3.90683
YciO	89.6	114.3	96.3	100.067	12.7735		105.9	102.8	95.7	101.467	5.22909		101.3	92.5	101.5	98.4333	5.13939
YciT	102.6	81.8	86.3	90.2333	10.9436		95.4	108	85.1	96.1667	11.4692		99.9	121.2	119.5	113.533	11.8374
YciU	140.8	0	140.2	93.6667	81.1183		121.3	135.1	109	121.8	13.0572		77	106.1	70.4	84.5	18.995
YciV	108.7	153.6	73.7	112	40.0521		147.7	58.3	72.5	92.8333	48.0435		105.9	52.2	127.3	95.1333	38.6904
YcjF	86.2	116.2	82.5	94.9667	18.4814		109.5	80.1	91.8	93.8	14.8017		84.4	89.4	159.9	111.233	42.2207
YcjG	100.9	92.8	94.6	96.1	4.25323		99.2	120.6	97.9	105.9	12.7472		124.9	96.5	72.4	97.9333	26.2793
YcjN	89.4	250.5	298.2	212.7	109.412		117.2	144.8	0	87.3333	76.8816		0	0	0	0	0
YcjW	122.5	108.9	93.7	108.367	14.4074		68.7	123.3	107.9	99.9667	28.1513		89	92.8	93.3	91.7	2.3516
YcjX	82.3	47.7	111.2	80.4	31.7926		94	104.9	101.7	100.2	5.60268		103.9	126.5	127.9	119.433	13.4705
YdbK	103.1	111.3	104.8	106.4	4.32782		102	103	99.9	101.633	1.58219		95	95.3	85.7	92	5.45802
YdcF	77	127.5	96.7	100.4	25.4525		51.6	124.9	107	94.5	38.2153		100.8	79.4	135.1	105.1	28.0979
YdcI	25.9	39.8	35.4	33.7	7.10422		93.4	75.9	65.8	78.3667	13.9644		212.5	173.1	178.1	187.9	21.4504
YdcJ	77.4	58.8	76.6	70.9333	10.5154		94.1	117.7	81.5	97.7667	18.3764		114.2	160.4	119.3	131.3	25.33
YdcL	84.2	91.1	92.8	89.3667	4.55448		76.8	72.8	86.4	78.6667	6.98952		153.2	150.5	92.2	131.967	34.4654
YdcS	53	75	84	70.6667	15.9478		84.8	97.3	87.8	89.9667	6.52559		152.5	142.8	122.7	139.333	15.1995
YdcY	119.3	92.4	135	115.567	21.544		101.2	101.5	91	97.9	5.97746		41.9	96.6	121.2	86.5667	40.5909
YddE	78	85.9	87	83.6333	4.90951		121.1	148.2	69.4	112.9	40.0349		133.6	71.3	105.6	103.5	31.203
YdeI	222.4	191.7	284	232.7	47.0041		35.5	27.4	57.1	40	15.3528		36.6	35.9	9.4	27.3	15.5058
YdeJ	127.2	93.6	192.3	137.7	50.1808		83.7	79.4	68.8	77.3	7.66877		74.2	111	70	85.0667	22.5569
YdeN	66.1	79.9	94.4	80.1333	14.1514		106.5	117.7	97.4	107.2	10.1681		121.2	126.2	90.7	112.7	19.2159
YdeT	0	0	0	0	0		0	0	0	0	0		0	0	0	0	0
YdfG	65.9	85.2	78.9	76.6667	9.84192		105.6	110	96.8	104.133	6.72111		104.1	130.4	123.2	119.233	13.5913
YdgA	86.4	82	86.6	85	2.6		75.5	73.3	73.3	74.0333	1.27017		167.2	150	105.7	140.967	31.7295
YdgD	68.9	54.2	63.1	62.0667	7.40428		128.3	101.2	96.5	108.667	17.1646		141.1	120.9	125.8	129.267	10.5368
YdgH	109.4	104.5	113.9	109.267	4.70142		110.9	104.9	103.4	106.4	3.96863		86.4	88.7	78	84.3667	5.63235
YdgJ	154.4	102	116.8	124.4	27.0141		112.3	128.6	109.4	116.767	10.35		82.2	57.4	36.8	58.8	22.7324
YdhA	0	0	0	0	0		0	0	0	0	0		0	0	0	0	0
YdhC	254	77.1	72.9	134.667	103.367		56.8	168.4	160.3	128.5	62.226		42.1	42.5	25.8	36.8	9.52838
YdhF	79.6	94	106.9	93.5	13.6569		87.3	90.9	97.8	92	5.33573		134.7	118.1	90.7	114.5	22.2198
YdhJ	132.2	78	120.7	110.3	28.5575		75.6	118.4	92.3	95.4333	21.5714		108.8	93.5	80.5	94.2667	14.1656
YdhQ	86	97.9	84.1	89.3333	7.47953		78.5	88.1	88.5	85.0333	5.66157		138.7	129.2	109.1	125.667	15.113
YdhR	88	111.3	90.7	96.6667	12.7445		92.2	110.8	86	96.3333	12.9063		119.4	102.9	98.7	107	10.9421
YdhS	65.9	63.5	59.5	62.9667	3.23316		78.5	54.1	71.3	67.9667	12.5369		260.7	123.5	122.9	169.033	79.3862
YdhW	0	0	0	0	0		198.1	0	304.3	167.467	154.446		0	0	397.6	132.533	229.554
YdiJ	80	76.9	98.3	85.0667	11.5647		94.3	130.3	116.3	113.633	18.1475		97.3	120.5	86.1	101.3	17.5454
YdiK	153.1	55.5	131.4	113.333	51.2469		65.4	81.1	99.6	82.0333	17.1191		146.4	97.2	70.2	104.6	38.6352
YdiY	0	0	0	0	0		0	0	0	0	0		0	0	0	0	0
YdjA	101	75.4	123.1	99.8333	23.8714		113.3	121.8	99	111.367	11.5223		92.7	90.2	83.5	88.8	4.7571
YdjF	76.3	131.3	89.3	98.9667	28.746		81.6	135.8	83.8	100.4	30.677		125.9	75.4	100.6	100.633	25.25
YdjK	0	0	0	0	0		0	0	0	0	0		0	0	0	0	0
YeaC	51	36.5	55.8	47.7667	10.0481		111.3	131	102.2	114.833	14.7215		182.3	130.1	99.7	137.367	41.7767
YeaD	73.5	91.9	70	78.4667	11.7645		124.8	121.4	91.8	112.667	18.1508		119	100.7	106.9	108.867	9.30717
YeaE	88.3	146.6	99.4	111.433	30.9568		137.4	120.2	142.6	133.4	11.7235		47.1	81.4	37	55.1667	23.2732
YeaG	70	72.1	71.9	71.3333	1.15902		125.3	108.6	98.7	110.867	13.4441		153.4	106.7	93.3	117.8	31.5501
YeaH	60.5	0	100.4	53.6333	50.551		124.5	129.4	58.5	104.133	39.5955		154.7	189.5	82.5	142.233	54.5785
YeaK	126.1	167.8	135.5	143.133	21.8729		76.3	84.7	104.1	88.3667	14.2581		1	94.5	110	68.5	58.9682
YeaO	96.2	145.2	67	102.8	39.5156		109.5	114.2	86.1	103.267	15.0514		82.7	88	111.2	93.9667	15.1579
YeaY	126.3	39.7	167.8	111.267	65.3598		105	49.4	128	94.1333	40.4111		110	81.4	92.3	94.5667	14.4341
YebC	107.3	91.7	105.9	101.633	8.63095		95.2	107.8	99.7	100.9	6.38514		102.5	99.6	90.4	97.5	6.31744
YebE	81.9	70.6	72.4	74.9667	6.07152		192.6	210.4	176.9	193.3	16.761		40.6	34.9	19.7	31.7333	10.8039
YebF	36.9	41.7	34.1	37.5667	3.84361		59.2	81.2	59.2	66.5333	12.7017		252.7	201.1	133.9	195.9	59.5705
YebG	129.4	97.5	102.3	109.733	17.2001		101.9	114.5	86.8	101.067	13.8688		90	94.9	82.7	89.2	6.13922
YebO	156.9	134.8	109.1	133.6	23.9226		116.3	82.3	81.1	93.2333	19.9853		82.7	75.4	61.3	73.1333	10.8786
YebT	84	100.5	77.5	87.3333	11.8568		90.7	106.8	78.6	92.0333	14.1472		142.6	116.5	102.9	120.667	20.1753
YebV	97.3	134.6	93.3	108.4	22.7778		74.9	96	66.2	79.0333	15.3239		171	102.5	64.1	112.533	54.1517
YebY	127.1	124.2	119.2	123.5	3.99625		123.5	123.1	107.8	118.133	8.95116		71.5	51	52.6	58.3667	11.4019
YecA	102.6	128.8	127.4	119.6	14.7391		93.6	102.5	108.6	101.567	7.54343		83.5	77.3	75.6	78.8	4.15812
YecD	157.4	165.9	179.7	167.667	11.2545		38.9	68.5	47.4	51.6	15.2404		102.6	88.9	50.7	80.7333	26.8965
YecF	219.8	44	189.9	151.233	94.0624		165.7	35	29.9	76.8667	76.9742		176.5	27.7	11.5	71.9	90.9477
YecJ	83	153.9	94.3	110.4	38.0934		71.1	97.3	71.7	80.0333	14.9564		122.6	105.8	100.4	109.6	11.5776
YecM	71.8	158.6	120.7	117.033	43.516		72.3	108.4	119	99.9	24.4829		118.8	73.4	56.9	83.0333	32.0547
YecR	81.2	111	139.5	110.567	29.1524		125.4	136.5	197.6	153.167	38.8786		35.4	58.4	15	36.2667	21.713
YedD	98.4	99.4	103.6	100.467	2.75923		108.8	108	100.2	105.667	4.75114		108.3	96.1	77.2	93.8667	15.6698
YedE	100.1	64.3	129.1	97.8333	32.4594		63.1	117.2	83.1	87.8	27.3545		58.4	77.9	207	114.433	80.7558
YedF	47.6	97.3	83.7	76.2	25.6848		88.1	112.1	93	97.7333	12.6808		47.1	59.4	271.9	126.133	126.387
YedI	109.4	111.2	97.5	106.033	7.44468		78.7	82.5	81.7	80.9667	2.00333		132.9	108.7	97.6	113.067	18.0506
YedP	179.4	112	162.3	151.233	35.0363		84.3	96.1	135.8	105.4	26.9802		57.9	44	28.2	43.3667	14.8601
YeeD	62.7	0	41.4	34.7	31.8824		56.8	57.2	41.7	51.9	8.83572		212.1	184.3	243.8	213.4	29.7713
YeeN	119.6	83.3	102.7	101.867	18.1643		109.3	91.4	134.4	111.7	21.6002		86.8	90.2	82.4	86.4667	3.91067
YeeX	101.6	69.9	83.4	84.9667	15.908		93.9	123.7	108.5	108.7	14.901		117.9	122.7	78.5	106.367	24.2523
YeeZ	81.5	131.4	97.4	103.433	25.4912		98.9	120.8	73	97.5667	23.9279		82.2	91	123.8	99	21.9235
YefM	107	128.9	126.9	120.933	12.108		79.4	71.8	101.9	84.3667	15.6526		101.2	125.1	57.8	94.7	34.1176
YegD	175.8	156.6	146.3	159.567	14.9721		114	107.2	89	103.4	12.9259		46.2	39.8	25.1	37.0333	10.8187
YegH	135.2	114.2	144.4	131.267	15.4794		109.6	101.3	51.3	87.4	31.5378		99.6	108.6	35.7	81.3	39.7463
YegP	205.1	143	159.9	169.333	32.1067		94.6	107.2	83.4	95.0667	11.9069		41.8	33.3	31.7	35.6	5.42863
YegS	71.5	63.4	78.9	71.2667	7.75263		75	67.4	63.9	68.7667	5.6748		195.5	117.4	167	159.967	39.5222
[truncated: 276 more rows]
