# Supplementary material
Source: Research Square preprint supplement (doi:10.21203/rs.3.rs-9685923/v1)
Supplement: Supplementary file 5 [file ceb78aaa906ba116a2dc295a.xlsx]

## Sheet: Table S3
Table S3. E. coli strains used in this study.
Name	Genetic feature	The number of the editing location	Derivationa			Reference
			Host	Genome cutter	Genome editer
MG1655	F- λ- rph-1	-	-	-	-	Hayash et al., 2006
W3110 typeA	W3110 strain expressing complete set of seven σ factors	-	-	-	-	Jishage et al., 1997
KYA03801	MG1655, agp (T24X)	1	MG1655	psgRNA-agp2	ds agp_PAM2stop	This study
KYA03901	MG1655, frmA (P11X)	1	MG1655	psgRNA-frmA2	ds frmA_PAM2stop	This study
KYA02501	W3110 typeA, hisG (R15X)	1	W3110 typeA	psgRNA-hisG3	ds hisG_PAM3stop	This study
KYA02601	W3110 typeA, hisI (T15X)	1	W3110 typeA	psgRNA-hisI3	ds hisI_PAM3stop	This study
KYA02701	W3110 typeA, pta (P9X)	1	W3110 typeA	psgRNA-pta1	ds pta_PAM1stop	This study
KYA02802	W3110 typeA, pfkB (P11X)	1	W3110 typeA	psgRNA-pfkB1	ds pfkB_PAM1stop	This study
KYA01702	W3110 typeA, atpD (A2X)	1	W3110 typeA	psgRNA-atpD1-6	ds atpD_PAM1stop	Ogawa et al, 2022 (as the W3110ΔatpD)
KYA00901	W3110 typeA, atpE (L4X)	1	W3110 typeA	psgRNA-atpE2-2	ds atpE_PAM2stop	Ogawa et al, 2022 (as the W3110ΔatpE)
YMA01403	W3110 typeA, arcA (A25X)	1	W3110 typeA	psgRNA-arcA4-4	ds arcA_PAM4stop	Miyake et al, 2020 (as the W3110ΔarcA)
YMA06001	W3110 typeA, atoC (P49X)	1	W3110 typeA	psgRNA-atoC8-1	ds atoC_PAM8stop	This study
YMA06307	W3110 typeA, baeR (P11X)	1	W3110 typeA	psgRNA-baeR1-1	ds baeR_PAM1stop	Miyake et al, 2020 (as the W3110ΔbaeR)
YMA00301	W3110 typeA, basR (T22X)	1	W3110 typeA	psgRNA-basR2-8	ds basR_PAM2stop	Miyake et al, 2020 (as the W3110ΔbasR)
YMA06808	W3110 typeA, cheB (S12X)	1	W3110 typeA	psgRNA-cheB1-1	ds cheB_PAM1stop	This study
YMA06208	W3110 typeA, cheY (T16X)	1	W3110 typeA	psgRNA-cheY2-2	ds cheY_PAM2stop	This study
YMA02503	W3110 typeA, citB (L16X)	1	W3110 typeA	psgRNA-citB1-2	ds citB_PAM1stop	This study
YMA01513	W3110 typeA, cpxR (R11X)	1	W3110 typeA	psgRNA-cpxR1-15	ds cpxR_PAM1stop	Miyake et al, 2020 (as the W3110ΔcpxR)
YMA05803	W3110 typeA, creB (L19X)	1	W3110 typeA	psgRNA-creB3-1	ds creB_PAM3stop	Miyake et al, 2020 (as the W3110ΔcreB)
YMA06405	W3110 typeA, cusR (G13X)	1	W3110 typeA	psgRNA-cusR1-25	ds cusR_PAM1stop	This study
YMA08502	W3110 typeA, cusR (G19X)	1	W3110 typeA	psgRNA-cusR2-2	ds cusR_PAM2stop	Miyake et al, 2020 (as the W3110ΔcusR)
YMA08913	W3110 typeA, dcuR (P25X)	1	W3110 typeA	psgRNA-dcuR7-4	ds dcuR_PAM2stop	This study
YMA00401	W3110 typeA, evgA (R40X)	1	W3110 typeA	psgRNA-evgA1-4	ds evgA_PAM1stop	This study
YMA06503	W3110 typeA, fimZ (P13X)	1	W3110 typeA	psgRNA-fimZ1-1	ds fimZ_PAM1stop	Ogawa et al, 2022 (as the W3110ΔfimZ)
YMA06604	W3110 typeA, glrR (P15X)	1	W3110 typeA	psgRNA-glrR1-1	ds glrR_PAM1stop	This study
YMA01901	W3110 typeA, kdpE (T19X)	1	W3110 typeA	psgRNA-kdpE1-63	ds kdpE_PAM1stop	Miyake et al, 2020 (as the W3110ΔkdpE)
YMA01301	W3110 typeA, narL (P16X)	1	W3110 typeA	psgRNA-narL2-17	ds narL_PAM2stop	This study
YMA05903	W3110 typeA, narP (A38X)	1	W3110 typeA	psgRNA-narP9-1	ds narP_PAM9stop	This study
YMA01601	W3110 typeA, ntrC (G25X)	1	W3110 typeA	psgRNA-ntrC2-4	ds ntrC_PAM2stop	This study
YMA02001	W3110 typeA, ompR (L16X)	1	W3110 typeA	psgRNA-ompR5-22	ds ompR_PAM5stop	Miyake et al, 2020 (as the W3110ΔompR)
YMA00201	W3110 typeA, phoB (P29X)	1	W3110 typeA	psgRNA-phoB1-17	ds phoB_PAM1stop	Miyake et al, 2020 (as the W3110ΔphoB)
KYA05301	MG1655, phoB (P29X)	1	MG1655	psgRNA-phoB1-17	ds phoB_PAM1stop	This study
YMA00502	W3110 typeA, phoP (G53X)	1	W3110 typeA	psgRNA-phoP1-23	ds phoP_PAM1stop	Miyake et al, 2020 (as the W3110ΔphoP)
YMA00601	W3110 typeA, qseB (G33X)	1	W3110 typeA	psgRNA-qseB1-21	ds qseB_PAM1stop	Miyake et al, 2020 (as the W3110ΔqseB)
YMA00801	W3110 typeA, rcsB (P13X)	1	W3110 typeA	psgRNA-rcsB3-8	ds rcsB_PAM3stop	This study
YMA06910	W3110 typeA, rssB (W26X)	1	W3110 typeA	psgRNA-rssB2-5	ds rssB_PAM2stop	This study
YMA01801	W3110 typeA, rstA (L21X)	1	W3110 typeA	psgRNA-rstA7-15	ds rstA_PAM7stop	Miyake et al, 2020 (as the W3110ΔrstA)
YMA00712	W3110 typeA, rstA (W71X)	1	W3110 typeA	psgRNA-rstA3-7	ds rstA_PAM3stop	This study
YMA05301	W3110 typeA, torR (P12X)	1	W3110 typeA	psgRNA-torR3-1	ds torR_PAM3stop	Miyake et al, 2020 (as the W3110ΔtorR)
YMA02101	W3110 typeA, uhpA (G16X)	1	W3110 typeA	psgRNA-uhpA1-43	ds uhpA_PAM1stop	This study
YMA05501	W3110 typeA, uvrY (G31X)	1	W3110 typeA	psgRNA-uvrY8-1	ds uvrY_PAM8stop	This study
YMA07129	W3110 typeA, hprR (Q13X)	1	W3110 typeA	psgRNA-yedW1-1	ds yedW_PAM1stop	Miyake et al, 2020 (as the W3110ΔhprR)
YMA04201	W3110 typeA, btsR (P11X)	1	W3110 typeA	psgRNA-yehT3-1	ds uvrY_PAM8stop	This study
YMA06705	W3110 typeA, ygeL (P13X)	1	W3110 typeA	psgRNA-ygeK3-2	ds ygeK_PAM3stop	This study
YMA07015	W3110 typeA, yhjB (G26X)	1	W3110 typeA	psgRNA-yhjB2-2	ds yhjB_PAM2stop	This study
YMA04501	W3110 typeA, pyrR (Q25X)	1	W3110 typeA	psgRNA-ypdB6-1	ds ypdB_PAM6stop	This study
YMA04603	W3110 typeA, btsT (W12X)	1	W3110 typeA	psgRNA-yjiY2-6	ds yjiY_PAM2stop	This study
YMA06101	W3110 typeA, zraR (H17X)	1	W3110 typeA	psgRNA-zraR1-1	ds zraR_PAM1stop	This study
RHA00301	MG1655, cpxR (D51A)	1	MG1655	psgRNA-cpxR2-12	ds cpxR_PAM2_D51A	This study
MHA01505	MG1655, cueR (G11X)	1	MG1655	psgRNA-cueR1	ds cueR_PAM1stop	This study
MHA00801	MG1655, gadX (E69X)	1	MG1655	psgRNA-gadX6	ds gadX_PAM6stop	This study
MHA00901	MG1655, fucR (E22X)	1	MG1655	psgRNA-fucR1	ds fucR_PAM1stop	This study
KYA04411	MG1655, ntrC (D54A)	1	MG1655	psgRNA-ntrC4	ds ntrC_PAM4_D54A	This study
KYA05139	MG1655, phoB (silent)	1	MG1655	psgRNA-phoB9	ds phoB_PAM9	This study
KYA05237	MG1655, phoB (D53A)	1	MG1655	psgRNA-phoB9	ds phoB_PAM9_D53A	This study
MYA01403	MG1655, rpoN (Q21X)	1	MG1655	psgRNA-rpoN1	ds rpoN_PAM1stop	This study
MYA00903	MG1655, rpoS (L55X)	1	MG1655	psgRNA-rpoS3	ds rpoS_PAM3stop	This study
MYA01101	MG1655, rpoH (R21X)	1	MG1655	psgRNA-rpoH1	ds rpoH_PAM1stop	This study
MYA01304	MG1655, rpoF (W17X)	1	MG1655	psgRNA-rpoF1	ds rpoF_PAM1stop	This study
MYA01201	MG1655, fecI (G18X)	1	MG1655	psgRNA-fecI1	ds fecI_PAM1stop	This study
KYA03701	MG1655, rpoN (P17X)	1	MG1655	psgRNA-rpoN7-1	ds rpoN_PAM7stop	This study
KYA03401	MG1655, rpoS (E23X)	1	MG1655	psgRNA-rpoS5	ds rpoS_PAM5stop	This study
KYA04102	MG1655, rpoH (G14X)	1	MG1655	psgRNA-rpoH4	ds rpoH_PAM4stop	This study
KYA03504	MG1655, rpoF (P22X)	1	MG1655	psgRNA-rpoF2	ds rpoF_PAM2stop	This study
KYA03601	MG1655, fecI (T7X)	1	MG1655	psgRNA-fecI4	ds fecI_PAM4stop	This study
RHA00101	MG1655, lacI (S21X)	1	MG1655	psgRNA-lacI7	ds lacI_PAM7stop	This study
MYA00108	MG1655, nikR (L16X)	1	MG1655	psgRNA-nikR1-15	ds nikR_PAM1stop	This study
MYA00201	MG1655, clpX (G31X)	1	MG1655	psgRNA-clpX1-1	ds clpX_PAM1stop	This study
MYA00301	MG1655, clpX (M142X)	1	MG1655	psgRNA-clpX3-1	ds clpX_PAM3stop	This study
MYA00401	MG1655, clpP (G27X)	1	MG1655	psgRNA-clpP2-1	ds clpP_PAM2stop	This study
MYA00501	MG1655, clpA (R41X)	1	MG1655	psgRNA-clpA7-2	ds clpA_PAM7stop	This study
MYA00601	MG1655, hslU (Q20X)	1	MG1655	psgRNA-hslU1-1	ds hslU_PAM1stop	This study
MYA00701	MG1655, hslU (L126X)	1	MG1655	psgRNA-hslU2-1	ds hslU_PAM2stop	This study
MYA00801	MG1655, hslV (G124X)	1	MG1655	psgRNA-hslV5	ds hslV_PAM5stop	This study
W3110-dps-S1	W3110 typeA, dps (V37X)	1	W3110 typeA	psgRNA-dps4-6	ds dps_PAM4multistop	This study
W3110-hupA-S1	W3110 typeA, hupA (Q20K, A21X)	1	W3110 typeA	psgRNA-hupA3-15	ds hupA_PAM3multistop	This study
W3110-hupB-S1	W3110 typeA, hupB (K9N, I10N, A11X)	1	W3110 typeA	psgRNA-hupB1-15	ds hupB_PAM1multistop	This study
W3110-hns-S1	W3110 typeA, hns (R15N, A16K, Q17X)	1	W3110 typeA	psgRNA-hns1-7	ds hns_PAM1multistop	This study
W3110-stpA-S1	W3110 typeA, stpA (L14N, R15X)	1	W3110 typeA	psgRNA-stpA2-5	ds stpA_PAM2multistop	This study
W3110-fis-S1	W3110 typeA, fis (S18L, Q19N, D20N, Q21X)	1	W3110 typeA	psgRNA-fis2-28	ds fis_PAM2multistop	This study
W3110-ihfB-S1	W3110 typeA, ihfB (T12N, Q13X)	1	W3110 typeA	psgRNA-ihfB1-40	ds ihfB_PAM1multistop	This study
MG1655-dps-S1	MG1655, dps (V37X)	1	MG1655	psgRNA-dps4-6	ds dps_PAM4multistop	This study
MG1655-hupA-S1	MG1655, hupA (Q20K, A21X)	1	MG1655	psgRNA-hupA3-15	ds hupA_PAM3multistop	This study
MG1655-hupB-S1	MG1655, hupB (K9N, I10N, A11X)	1	MG1655	psgRNA-hupB1-15	ds hupB_PAM1multistop	This study
MG1655-hns-S1	MG1655, hns (R15N, A16K, Q17X)	1	MG1655	psgRNA-hns1-7	ds hns_PAM1multistop	This study
MG1655-stpA-S1	MG1655, stpA (L14N, R15X)	1	MG1655	psgRNA-stpA2-5	ds stpA_PAM2multistop	This study
MG1655-fis-S1	MG1655, fis (S18L, Q19N, D20N, Q21X)	1	MG1655	psgRNA-fis2-28	ds fis_PAM2multistop	This study
TYA00101	W3110 typeA, ydfH (L29X)	1	W3110 typeA	psgRNA-ydfH7-1	ds ydfH_PAM7stop	This study
HWA00104	MG1655, nikA (R6X)	1	MG1655	psgRNA-nikA2-8	ds nikA_PAM2stop	This study
HWA00301	MG1655, rcnR (R6X)	1	MG1655	psgRNA-rcnR4-1	ds rcnR_PAM4stop	This study
HWA00204	MG1655, rcnA (W14X)	1	MG1655	psgRNA-rcnA2-4	ds rcnA_PAM2stop	This study
HWA00401	MG1655, zntA (G8X)	1	MG1655	psgRNA-zntA4-1	ds zntA_PAM4stop	This study
SSA00101	W3110 typeA, arcB (L20X)	1	W3110 typeA	psgRNA-arcB2-1	ds arcB_PAM2stop	This study
SSA01302	W3110 typeA, atoS (M19X)	1	W3110 typeA	psgRNA-atoS3-1	ds atoS_PAM3stop	This study
SSA02102	W3110 typeA, baeS (L14X)	1	W3110 typeA	psgRNA-baeS1-1	ds baeS_PAM1stop	This study
SSA01401	W3110 typeA, barA (L15X)	1	W3110 typeA	psgRNA-barA1-2	ds barA_PAM1stop	This study
YMA01003	W3110 typeA, basS (W32X)	1	W3110 typeA	psgRNA-basS1-1	ds basS_PAM1stop	This study
SSA02003	W3110 typeA, cheA (L20X)	1	W3110 typeA	psgRNA-cheA1-1	ds cheA_PAM1stop	This study
YMA03601	W3110 typeA, citA (L37X)	1	W3110 typeA	psgRNA-citA3-5	ds citA_PAM3stop	This study
SSA02203	W3110 typeA, cpxA (W14X)	1	W3110 typeA	psgRNA-cpxA1-9	ds cpxA_PAM1stop	This study
SSA01502	W3110 typeA, creC (A24X)	1	W3110 typeA	psgRNA-creC4-2	ds creC_PAM4stop	This study
SSA00515	W3110 typeA, cusS (R15X)	1	W3110 typeA	psgRNA-cusS3-14	ds cusS_PAM3stop	This study
SSA01001	W3110 typeA, dcuS (P14X)	1	W3110 typeA	psgRNA-dcuS1-1	ds dcuS_PAM1stop	This study
YMA03701	W3110 typeA, envZ (A13X)	1	W3110 typeA	psgRNA-envZ1-1	ds envZ_PAM1stop	Miyake et al, 2020 (as the W3110ΔenvZ)
SSA01701	W3110 typeA, evgS (T17X)	1	W3110 typeA	psgRNA-evgS1-31	ds evgS_PAM1stop	This study
SSA02302	W3110 typeA, glrK (L17X)	1	W3110 typeA	psgRNA-glrK2-1	ds glrK_PAM2stop	This study
SSA00402	W3110 typeA, kdpD (L14X)	1	W3110 typeA	psgRNA-kdpD1-4	ds kdpD_PAM1stop	This study
SSA00601	W3110 typeA, narQ (R13X)	1	W3110 typeA	psgRNA-narQ2-1	ds narQ_PAM2stop	This study
SSA00833	W3110 typeA, narX (Q14X)	1	W3110 typeA	psgRNA-narX1-2	ds narX_PAM1stop	This study
SSA01604	W3110 typeA, ntrB (L27X)	1	W3110 typeA	psgRNA-ntrB2-3	ds ntrB_PAM2stop	This study
YMA03501	W3110 typeA, phoQ (R50X)	1	W3110 typeA	psgRNA-phoQ2-81	ds phoQ_PAM2stop	Miyake et al, 2020 (as the W3110ΔphoQ)
YMA01101	W3110 typeA, phoR (L19X)	1	W3110 typeA	psgRNA-phoR2-4	ds phoR_PAM2stop	Miyake et al, 2020 (as the W3110ΔphoR)
YMA01201	W3110 typeA, qseC (A32X)	1	W3110 typeA	psgRNA-qseC2-16	ds qseC_PAM2stop	This study
SSA02501	W3110 typeA, rcsC (T10X)	1	W3110 typeA	psgRNA-rcsC1-1	ds rcsC_PAM1stop	This study
SSA02401	W3110 typeA, rcsD (L31X)	1	W3110 typeA	psgRNA-rcsD7-2	ds rcsD_PAM7stop	This study
SSA01801	W3110 typeA, rstB (L22X)	1	W3110 typeA	psgRNA-rstB5-1	ds rstB_PAM5stop	This study
SSA00204	W3110 typeA, torS (L15X)	1	W3110 typeA	psgRNA-torS3-2	ds torS_PAM3stop	This study
YMA01703	W3110 typeA, uhpB (A20X)	1	W3110 typeA	psgRNA-uhpB1-11	ds uhpB_PAM1stop	This study
SSA01901	W3110 typeA, hprS (G22X)	1	W3110 typeA	psgRNA-yedV2-2	ds yedV_PAM2stop	This study
YMA04301	W3110 typeA, btsS (Q35X)	1	W3110 typeA	psgRNA-yehU2-4	ds yehU_PAM2stop	This study
YMA04401	W3110 typeA, pyrS (L22X)	1	W3110 typeA	psgRNA-ypdA3-1	ds ypdA_PAM3stop	This study
SSA00301	W3110 typeA, zraS (V21X)	1	W3110 typeA	psgRNA-zraS3-1	ds zraS_PAM1stop	This study
MHA00302	MG1655, ybaQ (M55X)	1	MG1655	psgRNA-ybaQ6-1	ds ybaQ_PAM6stop	This study
HFA00106	MG1655, ybiJ (G19X)	1	MG1655	psgRNA-ybiJ2	ds ybiJ_PAM2stop	This study
HFA00222	MG1655, ynfU (R11X)	1	MG1655	psgRNA-ynfU1	ds ynfU_PAM1stop	This study
HFA00302	MG1655, ylaC (T9X)	1	MG1655	psgRNA-ylaC3	ds ylaC_PAM3stop	This study
KIA00101	W3110 typeA, rob (L18X)	1	W3110 typeA	psgRNA-rob2	ds rob_PAM2stop	This study
KIA00201	W3110 typeA, soxS (Q20X)	1	W3110 typeA	psgRNA-soxS1	ds soxS_PAM1stop	This study
KIA00301	W3110 typeA, marA (L22X)	1	W3110 typeA	psgRNA-marA2	ds marA_PAM2stop	This study
HHA00101	W3110 typeA, cbpA (P14X)	1	W3110 typeA	psgRNA-cbpA2	ds cbpA_PAM2stop	This study
HHA00102	W3110 typeA, cbpM (L15K)	1	W3110 typeA	psgRNA-cbpM2	ds cbpM_PAM2stop	This study
YTA00202	MG1655, cra (T15X)	1	MG1655	psgRNA-cra2-13	ds cra_PAM2stop	This study
YTA00101	MG1655, crp (P10X)	1	MG1655	psgRNA-crp3-40	ds crp_PAM3stop	This study
FKA00101	W3110 typeA, fur (L13X)	1	W3110 typeA	psgRNA-fur1-13	ds fur_PAM1stop	This study
GHA00101	W3110 typeA, cpxR (S15X)	1	W3110 typeA	psgRNA-cpxR7	ds cpxR_PAM7stop	This study
KYA01802	W3110 typeA, phoB (P29X), atpD (A2X)	2	YMA00201	psgRNA-atpD1-6	ds atpD_PAM1stop	Ogawa et al, 2022 (as the W3110ΔphoBΔatpD)
KYA01901	W3110 typeA, phoP (G53X), atpD (A2X)	2	YMA00502	psgRNA-atpD1-6	ds atpD_PAM1stop	Ogawa et al, 2022 (as the W3110ΔphoPΔatpD)
KYA02002	W3110 typeA, ompR (L16X), atpD (A2X)	2	YMA02001	psgRNA-atpD1-6	ds atpD_PAM1stop	This study
KYA01001	W3110 typeA, phoB (P29X), atpE(L4X)	2	YMA00201	psgRNA-atpE2-2	ds atpE_PAM2stop	Ogawa et al, 2022 (as the W3110ΔphoBΔatpE)
KYA01101	W3110 typeA, phoP (G53X), atpE(L4X)	2	YMA00502	psgRNA-atpE2-2	ds atpE_PAM2stop	Ogawa et al, 2022 (as the W3110ΔphoPΔatpE)
KYA01201	W3110 typeA, ompR (L16X), atpE(L4X)	2	YMA02001	psgRNA-atpE2-2	ds atpE_PAM2stop	This study
YMA03001	W3110 typeA, phoB (P29X), citB (L16X)	2	YMA00201	psgRNA-citB1-2	ds citB_PAM1stop	This study
YMA02801	W3110 typeA, phoP (G53X), citB (L16X)	2	YMA00502	psgRNA-citB1-2	ds citB_PAM1stop	This study
YMA07403	W3110 typeA, ompR (L16X), cpxR (R11X)	2	YMA02001	psgRNA-cpxR1-15	ds cpxR_PAM1stop	Miyake et al, 2020 (as the W3110ΔompRΔcpxR)
YMA07204	W3110 typeA, phoB (P29X), creB (L19X)	2	YMA00201	psgRNA-creB3-1	ds creB_PAM3stop	Miyake et al, 2020 (as the W3110ΔphoBΔcreB)
YMA10301	W3110 typeA, rstA (L21X), cusR (G19X)	2	YMA01801	psgRNA-cusR2-2	ds cusR_PAM2stop	Miyake et al, 2020 (as the W3110ΔrstAΔcusR)
YMA11101	W3110 typeA, kdpE (T19X), cusR (G19X)	2	YMA01901	psgRNA-cusR2-2	ds cusR_PAM2stop	This study
YMA11202	W3110 typeA, hprR (Q13X), cusR (G19X)	2	YMA07129	psgRNA-cusR2-2	ds cusR_PAM2stop	This study
KYA00201	W3110 typeA, phoB (P29X), fimZ(P13X)	2	YMA00201	psgRNA-fimZ1-1	ds fimZ_PAM1stop	Ogawa et al, 2022 (as the W3110ΔphoBΔfimZ)
KYA00301	W3110 typeA, phoP (G53X), fimZ(P13X)	2	YMA00502	psgRNA-fimZ1-1	ds fimZ_PAM1stop	Ogawa et al, 2022 (as the W3110ΔphoPΔfimZ)
KYA00401	W3110 typeA, ompR (L16X), fimZ(P13X)	2	YMA02001	psgRNA-fimZ1-1	ds fimZ_PAM1stop	This study
YMA07301	W3110 typeA, phoP (G53X), kdpE (T19X)	2	YMA00502	psgRNA-kdpE1-63	ds kdpE_PAM1stop	Miyake et al, 2020 (as the W3110ΔphoPΔkdpE)
YMA10401	W3110 typeA, hprR (Q13X), kdpE (T19X)	2	YMA07129	psgRNA-kdpE1-63	ds kdpE_PAM1stop	This study
YMA03101	W3110 typeA, phoB (P29X), ompR (L16X)	2	YMA00201	psgRNA-ompR5-22	ds ompR_PAM5stop	Miyake et al, 2020 (as the W3110ΔompRΔphoB)
YMA02901	W3110 typeA, phoP (G53X), ompR (L16X)	2	YMA00502	psgRNA-ompR5-22	ds ompR_PAM5stop	Miyake et al, 2020 (as the W3110ΔompRΔphoP)
YMA03202	W3110 typeA, citB (L16X), ompR (L16X)	2	YMA02503	psgRNA-ompR5-22	ds ompR_PAM5stop	This study
YMA02201	W3110 typeA, phoB (P29X), phoP (G53X)	2	YMA00201	psgRNA-phoP1-23	ds phoP_PAM1stop	Miyake et al, 2020 (as the W3110ΔphoBΔphoP)
YMA00901	W3110 typeA, phoB (P29X), qseB (G33X)	2	YMA00201	psgRNA-qseB1-21	ds qseB_PAM1stop	This study
YMA10201	W3110 typeA, kdpE (T19X), rstA (L21X)	2	YMA01901	psgRNA-rstA7-15	ds rstA_PAM7stop	This study
YMA07501	W3110 typeA, ompR (L16X), rstA (L21X)	2	YMA02001	psgRNA-rstA7-15	ds rstA_PAM7stop	Miyake et al, 2020 (as the W3110ΔompRΔrstA)
YMA11301	W3110 typeA, hprR (Q13X), rstA (L21X)	2	YMA07129	psgRNA-rstA7-15	ds rstA_PAM7stop	This study
KYA04202	MG1655, rpoF (P22X), rpoS (E23X)	2	KYA03504	psgRNA-rpoS5	ds rpoS_PAM5stop	This study
KYA04901	MG1655, rpoH (G14X), fecI (T7X)	2	KYA04102	psgRNA-fecI4	ds fecI_PAM4stop	This study
KYA04301	MG1655, rpoF (P22X), fecI (T7X)	2	KYA03504	psgRNA-fecI4	ds fecI_PAM4stop	This study
MYA01504	MG1655, hslU (Q20X), hslV (G124X)	2	MYA00601	psgRNA-hslV5	ds hslV_PAM5stop	This study
MYA01603	MG1655, hslU (L126X), hslV (G124X)	2	MYA00701	psgRNA-hslV5	ds hslV_PAM5stop	This study
MYA01701	MG1655, clpX (G31X), clpP (G27X)	2	MYA00201	psgRNA-clpP2-1	ds clpP_PAM2stop	This study
MYA01801	MG1655, clpX (M142X), clpP (G27X)	2	MYA00301	psgRNA-clpP2-1	ds clpP_PAM2stop	This study
MYA01901	MG1655, clpA (R41X), clpP (G27X)	2	MYA00501	psgRNA-clpP2-1	ds clpP_PAM2stop	This study
WCS01001	W3110 typeA, hns (R15N, A16K, Q17X), fis (S18L, Q19N, D20N, Q21X)	2	W3110-hns-S1	psgRNA-fis2-28	ds fis_PAM2multistop	This study
MCS01001	MG1655, hns (R15N, A16K, Q17X), fis (S18L, Q19N, D20N, Q21X)	2	MG1655-hns-S1	psgRNA-fis2-28	ds fis_PAM2multistop	This study
MYA02201	MG1655, clpP (G27X), fis (S18L, Q19N, D20N, Q21X)	2	MYA00401	psgRNA-fis2-28	ds fis_PAM2multistop	This study
TYA00201	W3110 typeA, phoB (P29X), phoR (L19X)	2	YMA00201	psgRNA-phoR2-4	ds phoR_PAM2stop	This study
TYA00301	W3110 typeA, phoB (P29X), ydfH (L29X)	2	YMA00201	psgRNA-ydfH7-1	ds ydfH_PAM7stop	This study
TYA00401	W3110 typeA, phoR (L19X), ydfH (L29X)	2	YMA01101	psgRNA-ydfH7-1	ds ydfH_PAM7stop	This study
HWA00503	MG1655, nikA (R6X), nikR (L16X)	2	HWA00104	psgRNA-nikR1-15	ds nikR_PAM1stop	This study
HWA00612	MG1655, rcnR (R6X), nikR (L16X)	2	HWA00301	psgRNA-nikR1-15	ds nikR_PAM1stop	This study
HWA00701	MG1655, rcnA (W14X), nikR (L16X)	2	HWA00204	psgRNA-nikR1-15	ds nikR_PAM1stop	This study
HWA01311	MG1655, zntA (G8X), nikR (L16X)	2	HWA00401	psgRNA-nikR1-15	ds nikR_PAM1stop	This study
HWA00801	MG1655, nikA (R6X), rcnR (R6X)	2	HWA00104	psgRNA-rcnR4-1	ds rcnR_PAM4stop	This study
HWA00902	MG1655, nikA (R6X), zntA (G8X)	2	HWA00104	psgRNA-zntA4-1	ds zntA_PAM4stop	This study
HWA01003	MG1655, rcnR (R6X), zntA (G8X)	2	HWA00301	psgRNA-zntA4-1	ds zntA_PAM4stop	This study
HWA01401	MG1655, nikA (R6X), rcnA (W14X)	2	HWA00104	psgRNA-rcnA2-4	ds rcnA_PAM2stop	This study
HWA01103	MG1655, rcnR (R6X), rcnA (W14X)	2	HWA00301	psgRNA-rcnA2-4	ds rcnA_PAM2stop	This study
HWA01201	MG1655, zntA (G8X), rcnA (W14X)	2	HWA00401	psgRNA-rcnA2-4	ds rcnA_PAM2stop	This study
YMA03901	W3110 typeA, phoQ (R50X), envZ (A13X)	2	YMA03501	psgRNA-envZ1-1	ds envZ_PAM1stop	Miyake et al, 2020 (as the W3110ΔenvZΔphoQ)
YMA04001	W3110 typeA, phoR (L19X), envZ (A13X)	2	YMA01101	psgRNA-envZ1-1	ds envZ_PAM1stop	Miyake et al, 2020 (as the W3110ΔenvZΔphoR)
YMA10701	W3110 typeA, ompR (L16X), envZ (A13X)	2	YMA02001	psgRNA-envZ1-1	ds envZ_PAM1stop	Miyake et al, 2020 (as the W3110ΔompRΔenvZ)
SSA05603	W3110 typeA, qseC (A32X), envZ (A13X)	2	YMA01201	psgRNA-envZ1-1	ds envZ_PAM1stop	This study
YMA10602	W3110 typeA, phoP (G53X), phoQ (R50X)	2	YMA00502	psgRNA-phoQ2-81	ds phoQ_PAM2stop	Miyake et al, 2020 (as the W3110ΔphoPΔphoQ)
SSA05201	W3110 typeA, qseC (A32X), phoQ (R50X)	2	YMA01201	psgRNA-phoQ2-81	ds phoQ_PAM2stop	This study
YMA10501	W3110 typeA, phoB (P29X), phoR (L19X)	2	YMA00201	psgRNA-phoR2-4	ds phoR_PAM2stop	Miyake et al, 2020 (as the W3110ΔphoBΔphoR)
YMA03801	W3110 typeA, phoQ (R50X), phoR (L19X)	2	YMA03501	psgRNA-phoR2-4	ds phoR_PAM2stop	Miyake et al, 2020 (as the W3110ΔphoRΔphoQ)
SSA05301	W3110 typeA, phoQ (R50X), qseC (A32X)	2	YMA03501	psgRNA-qseC2-16	ds qseC_PAM2stop	This study
SSA00701	W3110 typeA, cusS (R15X), zraS (V21X)	2	SSA00515	psgRNA-zraS3-1	ds zraS_PAM1stop	This study
HHA00104	W3110 typeA, cbpM (L15K), cbpA (P14X)	2	HHA00102	psgRNA-cbpA2	ds cbpA_PAM2stop	This study
YTA00301	MG1655, crp (P10X), cra (T15X)	2	YTA00101	psgRNA-cra2-13	ds cra_PAM2stop	This study
KYA02101	W3110 typeA, phoB (P29X), phoP (G53X), atpD (A2X)	3	YMA02201	psgRNA-atpD1-6	ds atpD_PAM1stop	Ogawa et al, 2022 (as the W3110ΔphoBΔphoPΔatpD)
KYA02301	W3110 typeA, phoP (G53X), ompR (L16X), atpD (A2X)	3	YMA02901	psgRNA-atpD1-6	ds atpD_PAM1stop	This study
KYA02401	W3110 typeA, phoB (P29X), ompR (L16X), atpD (A2X)	3	YMA03101	psgRNA-atpD1-6	ds atpD_PAM1stop	This study
KYA01301	W3110 typeA, phoB (P29X), phoP (G53X), atpE (L4X)	3	YMA02201	psgRNA-atpE2-2	ds atpE_PAM2stop	Ogawa et al, 2022 (as the W3110ΔphoBΔphoPΔatpE)
KYA01501	W3110 typeA, phoP (G53X), ompR (L16X), atpE (L4X)	3	YMA02901	psgRNA-atpE2-2	ds atpE_PAM2stop	This study
KYA01601	W3110 typeA, phoB (P29X), ompR (L16X), atpE (L4X)	3	YMA03101	psgRNA-atpE2-2	ds atpE_PAM2stop	This study
YMA02701	W3110 typeA, phoB (P29X), phoP (G53X), citB (L16X)	3	YMA02201	psgRNA-citB1-2	ds citB_PAM1stop	This study
YMA10901	W3110 typeA, hprR (Q13X), kdpE (T19X), cusR (G19X)	3	YMA10401	psgRNA-cusR2-2	ds cusR_PAM2stop	This study
KYA00501	W3110 typeA, phoB (P29X), phoP (G53X), fimZ(P13X)	3	YMA02201	psgRNA-fimZ1-1	ds fimZ_PAM1stop	Ogawa et al, 2022 (as the W3110ΔphoBΔphoPΔfimZ)
KYA00701	W3110 typeA, phoP (G53X), ompR (L16X), fimZ(P13X)	3	YMA02901	psgRNA-fimZ1-1	ds fimZ_PAM1stop	This study
KYA00801	W3110 typeA, phoB (P29X), ompR (L16X), fimZ(P13X)	3	YMA03101	psgRNA-fimZ1-1	ds fimZ_PAM1stop	This study
YMA02302	W3110 typeA, phoB (P29X), phoP (G53X), ompR (L16X)	3	YMA02201	psgRNA-ompR5-22	ds ompR_PAM5stop	Miyake et al, 2020 (as the W3110ΔompRΔphoBΔphoP)
YMA03302	W3110 typeA, phoP (G53X), citB (L16X), ompR (L16X)	3	YMA02801	psgRNA-ompR5-22	ds ompR_PAM5stop	This study
YMA11003	W3110 typeA, rstA (L21X), cusR (G19X), hprR (Q13X)	3	YMA10301	psgRNA-yedW1-1	ds yedW_PAM1stop	Miyake et al, 2020 (as the W3110ΔrstAΔcusRΔhprR)
KYA05602	MG1655, rpoH (G14X), fecI (T7X), rpoS (E23X)	3	KYA04901	psgRNA-rpoS5	ds rpoS_PAM5stop	This study
KYA04705	MG1655, rpoF (P22X), fecI (T7X), rpoS (P22X)	3	KYA04301	psgRNA-rpoS5	ds rpoS_PAM5stop	This study
KYA05004	MG1655, rpoF (P22X), rpoS (E23X), rpoH (G14X)	3	KYA04202	psgRNA-rpoH4	ds rpoH_PAM4stop	This study
KYA05703	MG1655, rpoH (G14X), fecI (T7X), rpoF (P22X)	3	KYA04901	psgRNA-rpoF2	ds rpoF_PAM2stop	This study
KYA04801	MG1655, rpoF (P22X), rpoS (E23X), fecI (T7X)	3	KYA04202	psgRNA-fecI4	ds fecI_PAM4stop	This study
MYA02001	MG1655, clpX (G31X), clpP (G27X), clpA (R41X)	3	MYA01701	psgRNA-clpA7-2	ds clpA_PAM7stop	This study
MYA02101	MG1655, clpX (M142X), clpP (G27X), clpA (R41X)	3	MYA01801	psgRNA-clpA7-2	ds clpA_PAM7stop	This study
WCS01101	W3110 typeA, hns (R15N, A16K, Q17X), fis (S18L, Q19N, D20N, Q21X), hupA (Q20K, A21X)	3	WCS01001	psgRNA-hupA3-15	ds hupA_PAM3multistop	This study
MCS01101	MG1655, hns (R15N, A16K, Q17X), fis (S18L, Q19N, D20N, Q21X), hupA (Q20K, A21X)	3	MCS01001	psgRNA-hupA3-15	ds hupA_PAM3multistop	This study
TYA00501	W3110 typeA, phoB (P29X), phoR (L19X), ydfH (L29X)	3	TYA00201	psgRNA-ydfH7-1	ds ydfH_PAM7stop	This study
HWA01501	MG1655, nikA (R6X), rcnA (W14X), zntA (G8X)	3	HYA01401	psgRNA-zntA4-1	ds zntA_PAM4stop	This study
HWA01602	MG1655, nikA (R6X), zntA (G8X), rcnA (W14X)	3	HYA00902	psgRNA-rcnA2-4	ds rcnA_PAM2stop	This study
YMA04101	W3110 typeA, phoQ (R50X), phoR (L19X), envZ (A13X)	3	YMA03801	psgRNA-envZ1-1	ds envZ_PAM1stop	Miyake et al, 2020 (as the W3110ΔenvZΔphoRΔphoQ)
SSA05401	W3110 typeA, qseC (A32X), phoQ (R50X), envZ (A13X)	3	SSA05201	psgRNA-envZ1-1	ds envZ_PAM1stop	This study
SSA00904	W3110 typeA, cusS (R15X), zraS (V21X), kdpD (L14X)	3	SSA00701	psgRNA-kdpD1-4	ds kdpD_PAM1stop	This study
KYA02202	W3110 typeA, phoB (P29X), phoP (G53X), ompR (L16X), atpD(A2X)	4	YMA02302	psgRNA-atpD1-6	ds atpD_PAM1stop	This study
KYA01403	W3110 typeA, phoB (P29X), phoP (G53X), ompR (L16X), atpE(L4X)	4	YMA02302	psgRNA-atpE2-2	ds atpE_PAM2stop	This study
YMA02601	W3110 typeA, phoB (P29X), phoP (G53X), ompR (L16X), citB (L16X)	4	YMA02302	psgRNA-citB1-2	ds citB_PAM1stop	This study
KYA00601	W3110 typeA, phoB (P29X), phoP (G53X), ompR (L16X), fimZ(P13X)	4	YMA02302	psgRNA-fimZ1-1	ds fimZ_PAM1stop	This study
YMA02401	W3110 typeA, phoB (P29X), phoP (G53X), ompR (L16X), narL (P16X)	4	YMA02302	psgRNA-narL2-17	ds narL_PAM2stop	This study
MHA01001	MG1655, clpA (R41X), clpX (G31X), clpP (G27X), cueR (G11X)	4	MYA02001	psgRNA-cueR1	ds cueR_PAM1stop	This study
MHA01101	MG1655, clpA (R41X), clpX (G31X), clpP (G27X), gadX (E69X)	4	MYA02001	psgRNA-gadX6	ds gadX_PAM6stop	This study
MHA01201	MG1655, clpA (R41X), clpX (G31X), clpP (G27X), fucR (E22X)	4	MYA02001	psgRNA-fucR1	ds fucR_PAM1stop	This study
MHA01301	MG1655, clpA (R41X), clpX (G31X), clpP (G27X), rpoS (L55X)	4	MYA02001	psgRNA-rpoS3	ds rpoS_PAM3stop	This study
KYA06142	MG1655, rpoH (G14X), fecI (T7X), rpoF (P22X), rpoS (E23X)	4	KYA05703	psgRNA-rpoS5	ds rpoS_PAM5stop	This study
KYA05846	MG1655, rpoF (P22X), rpoS (E23X), fecI (T7X), rpoH (G14X)	4	KYA04801	psgRNA-rpoH4	ds rpoH_PAM4stop	This study
KYA06041	MG1655, rpoH (G14X), fecI (T7X), rpoS (E23X), rpoF (P22X)	4	KYA05602	psgRNA-rpoF2	ds rpoF_PAM2stop	This study
KYA05941	MG1655, rpoF (P22X), rpoS (E23X), rpoH (G14X), fecI (T7X)	4	KYA05004	psgRNA-fecI4	ds fecI_PAM4stop	This study
MHA00101	MG1655, clpX (M142X), clpP (G27X), clpA (R41X), hslU (Q20X)	4	MYA02101	psgRNA-hslU1-1	ds hslU_PAM1stop	This study
WCS01201	W3110 typeA, hns (R15N, A16K, Q17X), fis (S18L, Q19N, D20N, Q21X), hupA (Q20K, A21X), hupB (K9N, I10N, A11X)	4	WCS01101	psgRNA-hupB1-15	ds hupB_PAM1multistop	This study
MCS01202	MG1655, hns (R15N, A16K, Q17X), fis (S18L, Q19N, D20N, Q21X), hupA (Q20K, A21X), hupB (K9N, I10N, A11X)	4	MCS01101	psgRNA-hupB1-15	ds hupB_PAM1multistop	This study
MHA00701	MG1655, clpX (G31X), clpP (G27X), clpA (R41X), fis (S18L, Q19N, D20N, Q21X)	4	MYA02101	psgRNA-fis2-28	ds fis_PAM2multistop	This study
SSA01102	W3110 typeA, cusS (R15X), zraS (V21X), kdpD (L14X), phoQ (R50X)	4	SSA00904	psgRNA-phoQ2-81	ds phoQ_PAM2stop	This study
MHA00602	MG1655, clpA (R41X), clpX (G31X), clpP (G27X), ybaQ (M55X)	4	MYA02001	psgRNA-ybaQ6-1	ds ybaQ_PAM6stop	This study
YMA04701	W3110 typeA, phoB (P29X), phoP (G53X), ompR (L16X), citB (L16X), narL (P16X)	5	YMA02601	psgRNA-narL2-17	ds narL_PAM2stop	This study
KYA06341	MG1655, rpoF (P22X), rpoS (E23X), fecI (T7X), rpoH (G14X), rpoN (P17X)	5	KYA05847	psgRNA-rpoN7-1	ds rpoN_PAM7stop	This study
MHA00205	MG1655, clpX (M142X), clpP (G27X), clpA (R41X), hslU (Q20X), hslV (G124X)	5	MHA00101	psgRNA-hslV5	ds hslV_PAM5stop	This study
WCS01301	W3110 typeA, hns (R15N, A16K, Q17X), fis (S18L, Q19N, D20N, Q21X), hupA (Q20K, A21X), hupB (K9N, I10N, A11X), stpA (L14N, R15X)	5	WCS01201	psgRNA-stpA2-5	ds stpA_PAM2multistop	This study
MCS01301	MG1655, hns (R15N, A16K, Q17X), fis (S18L, Q19N, D20N, Q21X), hupA (Q20K, A21X), hupB (K9N, I10N, A11X), stpA (L14N, R15X)	5	MCS01202	psgRNA-stpA2-5	ds stpA_PAM2multistop	This study
MHA01401	MG1655, clpA (R41X), clpX (G31X), clpP (G27X), ybaQ (M55X), fis (S18L, Q19N, D20N, Q21X)	5	MHA00602	psgRNA-fis2-28	ds fis_PAM2multistop	This study
SSA01202	W3110 typeA, cusS (R15X), zraS (V21X), kdpD (L14X), phoQ (R50X), basS (W32X)	5	SSA01102	psgRNA-basS1-1	ds basS_PAM1stop	This study
YMA04814	W3110 typeA, phoB (P29X), phoP (G53X), ompR (L16X), citB (L16X), narL (P16X), cpxR (R11X)	6	YMA04701	psgRNA-cpxR1-15	ds cpxR_PAM1stop	This study
WCS01401	W3110 typeA, hns (R15N, A16K, Q17X), fis (S18L, Q19N, D20N, Q21X), hupA (Q20K, A21X), hupB (K9N, I10N, A11X), stpA (L14N, R15X), dps (V37X)	6	WCS01301	psgRNA-dps4-6	ds dps_PAM4multistop	This study
MCS01401	MG1655, hns (R15N, A16K, Q17X), fis (S18L, Q19N, D20N, Q21X), hupA (Q20K, A21X), hupB (K9N, I10N, A11X), stpA (L14N, R15X), dps (V37X)	6	MCS01301	psgRNA-dps4-6	ds dps_PAM4multistop	This study
SSA02601	W3110 typeA, cusS (R15X), zraS (V21X), kdpD (L14X), phoQ (R50X), basS (W32X), baeS (L14X)	6	SSA01202	psgRNA-baeS1-1	ds baeS_PAM1stop	This study
YMA04901	W3110 typeA, phoB (P29X), phoP (G53X), ompR (L16X), citB (L16X), narL (P16X), cpxR (R11X), uhpA (G16X)	7	YMA04814	psgRNA-uhpA1-43	ds uhpA_PAM1stop	This study
SSA02702	W3110 typeA, cusS (R15X), zraS (V21X), kdpD (L14X), phoQ (R50X), basS (W32X), baeS (L14X), cpxA (W14X)	7	SSA02601	psgRNA-cpxA1-9	ds cpxA_PAM1stop	This study
YMA05001	W3110 typeA, phoB (P29X), phoP (G53X), ompR (L16X), citB (L16X), narL (P16X), cpxR (R11X), uhpA (G16X), rstA (L21X)	8	YMA04901	psgRNA-rstA7-15	ds rstA_PAM7stop	This study
SSA02801	W3110 typeA, cusS (R15X), zraS (V21X), kdpD (L14X), phoQ (R50X), basS (W32X), baeS (L14X), cpxA (W14X), envZ (A13X)	8	SSA02702	psgRNA-envZ1-1	ds envZ_PAM1stop	This study
YMA05103	W3110 typeA, phoB (P29X), phoP (G53X), ompR (L16X), citB (L16X), narL (P16X), cpxR (R11X), uhpA (G16X), rstA (L21X), evgA (R40X)	9	YMA05001	psgRNA-evgA1-4	ds evgA_PAM1stop	This study
SSA03001	W3110 typeA, cusS (R15X), zraS (V21X), kdpD (L14X), phoQ (R50X), basS (W32X), baeS (L14X), cpxA (W14X), envZ (A13X), evgS (T17X)	9	SSA02801	psgRNA-evgS1-31	ds evgS_PAM1stop	This study
YMA05201	W3110 typeA, phoB (P29X), phoP (G53X), ompR (L16X), citB (L16X), narL (P16X), cpxR (R11X), uhpA (G16X), rstA (L21X), evgA (R40X), kdpE (T19X), Δ315-bp between insAB and yfbQ	10	YMA05103	psgRNA-kdpE1-63	ds kdpE_PAM1stop	This study
SSA03102	W3110 typeA, cusS (R15X), zraS (V21X), kdpD (L14X), phoQ (R50X), basS (W32X), baeS (L14X), cpxA (W14X), envZ (A13X), evgS (T17X), glrK (L17X)	10	SSA03001	psgRNA-glrK2-1	ds glrK_PAM2stop	This study
YMA05401	W3110 typeA, phoB (P29X), phoP (G53X), ompR (L16X), citB (L16X), narL (P16X), cpxR (R11X), uhpA (G16X), rstA (L21X), evgA (R40X), kdpE (T19X), Δ315-bp between insAB and yfbQ, torR (P12X)	11	YMA05201	psgRNA-torR3-1	ds torR_PAM3stop	This study
SSA03201	W3110 typeA, cusS (R15X), zraS (V21X), kdpD (L14X), phoQ (R50X), basS (W32X), baeS (L14X), cpxA (W14X), envZ (A13X), evgS (T17X), glrK (L17X), qseC (A32X)	11	SSA03102	psgRNA-qseC2-16	ds qseC_PAM2stop	This study
YMA05601	W3110 typeA, phoB (P29X), phoP (G53X), ompR (L16X), citB (L16X), narL (P16X), cpxR (R11X), uhpA (G16X), rstA (L21X), evgA (R40X), kdpE (T19X), Δ315-bp between insAB and yfbQ, torR (P12X), uvrY (G31X)	12	YMA05401	psgRNA-uvrY8-1	ds uvrY_PAM8stop	This study
SSA03302	W3110 typeA, cusS (R15X), zraS (V21X), kdpD (L14X), phoQ (R50X), basS (W32X), baeS (L14X), cpxA (W14X), envZ (A13X), evgS (T17X), glrK (L17X), qseC (A32X), rcsC (T10X)	12	SSA03201	psgRNA-rcsC1-1	ds rcsC_PAM1stop	This study
YMA05701	W3110 typeA, phoB (P29X), phoP (G53X), ompR (L16X), citB (L16X), narL (P16X), cpxR (R11X), uhpA (G16X), rstA (L21X), evgA (R40X), kdpE (T19X), Δ315-bp between insAB and yfbQ, torR (P12X), uvrY (G31X), qseB (G33X)	13	YMA05601	psgRNA-qseB1-21	ds qseB_PAM1stop	This study
SSA03401	W3110 typeA, cusS (R15X), zraS (V21X), kdpD (L14X), phoQ (R50X), basS (W32X), baeS (L14X), cpxA (W14X), envZ (A13X), evgS (T17X), glrK (L17X), qseC (A32X), rcsC (T10X), rcsD (L31X)	13	SSA03302	psgRNA-rcsD7-2	ds rcsD_PAM7stop	This study
YMA07601	W3110 typeA, phoB (P29X), phoP (G53X), ompR (L16X), citB (L16X), narL (P16X), cpxR (R11X), uhpA (G16X), rstA (L21X), evgA (R40X), kdpE (T19X), Δ315-bp between insAB and yfbQ, torR (P12X), uvrY (G31X), qseB (G33X), arcA (A25X)	14	YMA05701	psgRNA-arcA4-4	ds arcA_PAM4stop	This study
SSA03502	W3110 typeA, cusS (R15X), zraS (V21X), kdpD (L14X), phoQ (R50X), basS (W32X), baeS (L14X), cpxA (W14X), envZ (A13X), evgS (T17X), glrK (L17X), qseC (A32X), rcsC (T10X), rcsD (L31X), rstB (L22X)	14	SSA03401	psgRNA-rstB5-1	ds rstB_PAM5stop	This study
YMA07701	W3110 typeA, phoB (P29X), phoP (G53X), ompR (L16X), citB (L16X), narL (P16X), cpxR (R11X), uhpA (G16X), rstA (L21X), evgA (R40X), kdpE (T19X), Δ315-bp between insAB and yfbQ, torR (P12X), uvrY (G31X), qseB (G33X), arcA (A25X), atoC (P49X)	15	YMA07601	psgRNA-atoC8-1	ds atoC_PAM8stop	This study
SSA03601	W3110 typeA, cusS (R15X), zraS (V21X), kdpD (L14X), phoQ (R50X), basS (W32X), baeS (L14X), cpxA (W14X), envZ (A13X), evgS (T17X), glrK (L17X), qseC (A32X), rcsC (T10X), rcsD (L31X), rstB (L22X), hprS (G22X)	15	SSA03502	psgRNA-yedV2-2	ds yedV_PAM2stop	This study
YMA07806	W3110 typeA, phoB (P29X), phoP (G53X), ompR (L16X), citB (L16X), narL (P16X), cpxR (R11X), uhpA (G16X), rstA (L21X), evgA (R40X), kdpE (T19X), Δ315-bp between insAB and yfbQ, torR (P12X), uvrY (G31X), qseB (G33X), arcA (A25X), atoC (P49X), baeR (P11X)	16	YMA07701	psgRNA-baeR1-1	ds baeR_PAM1stop	This study
SSA03701	W3110 typeA, cusS (R15X), zraS (V21X), kdpD (L14X), phoQ (R50X), basS (W32X), baeS (L14X), cpxA (W14X), envZ (A13X), evgS (T17X), glrK (L17X), qseC (A32X), rcsC (T10X), rcsD (L31X), rstB (L22X), hprS (G22X), atoS (M19X)	16	SSA03601	psgRNA-atoS3-1	ds atoS_PAM3stop	This study
YMA07901	W3110 typeA, phoB (P29X), phoP (G53X), ompR (L16X), citB (L16X), narL (P16X), cpxR (R11X), uhpA (G16X), rstA (L21X), evgA (R40X), kdpE (T19X), Δ315-bp between insAB and yfbQ, torR (P12X), uvrY (G31X), qseB (G33X), arcA (A25X), atoC (P49X), baeR (P11X), ntrC (G25X)	17	YMA07806	psgRNA-ntrC2-4	ds ntrC_PAM2stop	This study
SSA03801	W3110 typeA, cusS (R15X), zraS (V21X), kdpD (L14X), phoQ (R50X), basS (W32X), baeS (L14X), cpxA (W14X), envZ (A13X), evgS (T17X), glrK (L17X), qseC (A32X), rcsC (T10X), rcsD (L31X), rstB (L22X), hprS (G22X), atoS (M19X), barA (L15X)	17	SSA03701	psgRNA-barA1-2	ds barA_PAM1stop	This study
YMA08001	W3110 typeA, phoB (P29X), phoP (G53X), ompR (L16X), citB (L16X), narL (P16X), cpxR (R11X), uhpA (G16X), rstA (L21X), evgA (R40X), kdpE (T19X), Δ315-bp between insAB and yfbQ, torR (P12X), uvrY (G31X), qseB (G33X), arcA (A25X), atoC (P49X), baeR (P11X), ntrC (G25X), rcsB (P13X)	18	YMA07901	psgRNA-rcsB3-8	ds rcsB_PAM3stop	This study
SSA03901	W3110 typeA, cusS (R15X), zraS (V21X), kdpD (L14X), phoQ (R50X), basS (W32X), baeS (L14X), cpxA (W14X), envZ (A13X), evgS (T17X), glrK (L17X), qseC (A32X), rcsC (T10X), rcsD (L31X), rstB (L22X), hprS (G22X), atoS (M19X), barA (L15X), creC (A24X)	18	SSA03801	psgRNA-creC4-2	ds creC_PAM4stop	This study
YMA08108	W3110 typeA, phoB (P29X), phoP (G53X), ompR (L16X), citB (L16X), narL (P16X), cpxR (R11X), uhpA (G16X), rstA (L21X), evgA (R40X), kdpE (T19X), Δ315-bp between insAB and yfbQ, torR (P12X), uvrY (G31X), qseB (G33X), arcA (A25X), atoC (P49X), baeR (P11X), ntrC (G25X), rcsB (P13X), pyrR (Q25X)	19	YMA08001	psgRNA-ypdB6-1	ds ypdB_PAM6stop	This study
SSA04001	W3110 typeA, cusS (R15X), zraS (V21X), kdpD (L14X), phoQ (R50X), basS (W32X), baeS (L14X), cpxA (W14X), envZ (A13X), evgS (T17X), glrK (L17X), qseC (A32X), rcsC (T10X), rcsD (L31X), rstB (L22X), hprS (G22X), atoS (M19X), barA (L15X), creC (A24X), ntrB (L27X)	19	SSA03901	psgRNA-ntrB2-3	ds ntrB_PAM2stop	This study
YMA08201	W3110 typeA, phoB (P29X), phoP (G53X), ompR (L16X), citB (L16X), narL (P16X), cpxR (R11X), uhpA (G16X), rstA (L21X), evgA (R40X), kdpE (T19X), Δ315-bp between insAB and yfbQ, torR (P12X), uvrY (G31X), qseB (G33X), arcA (A25X), atoC (P49X), baeR (P11X), ntrC (G25X), rcsB (P13X), pyrR (Q25X), btsR (P11X)	20	YMA08108	psgRNA-yehT3-1	ds yehT_PAM3stop	This study
SSA04102	W3110 typeA, cusS (R15X), zraS (V21X), kdpD (L14X), phoQ (R50X), basS (W32X), baeS (L14X), cpxA (W14X), envZ (A13X), evgS (T17X), glrK (L17X), qseC (A32X), rcsC (T10X), rcsD (L31X), rstB (L22X), hprS (G22X), atoS (M19X), barA (L15X), creC (A24X), ntrB (L27X), phoR (L19X)	20	SSA04001	psgRNA-phoR2-4	ds phoR_PAM2stop	This study
YMA08302	W3110 typeA, phoB (P29X), phoP (G53X), ompR (L16X), citB (L16X), narL (P16X), cpxR (R11X), uhpA (G16X), rstA (L21X), evgA (R40X), kdpE (T19X), Δ315-bp between insAB and yfbQ, torR (P12X), uvrY (G31X), qseB (G33X), arcA (A25X), atoC (P49X), baeR (P11X), ntrC (G25X), rcsB (P13X), pyrR (Q25X), btsR (P11X), creB (L19X)	21	YMA08201	psgRNA-creB3-1	ds creB_PAM3stop	This study
SSA04205	W3110 typeA, cusS (R15X), zraS (V21X), kdpD (L14X), phoQ (R50X), basS (W32X), baeS (L14X), cpxA (W14X), envZ (A13X), evgS (T17X), glrK (L17X), qseC (A32X), rcsC (T10X), rcsD (L31X), rstB (L22X), hprS (G22X), atoS (M19X), barA (L15X), creC (A24X), ntrB (L27X), phoR (L19X), uhpB (A20X)	21	SSA04102	psgRNA-uhpB1-11	ds uhpB_PAM1stop	This study
YMA08401	W3110 typeA, phoB (P29X), phoP (G53X), ompR (L16X), citB (L16X), narL (P16X), cpxR (R11X), uhpA (G16X), rstA (L21X), evgA (R40X), kdpE (T19X), Δ315-bp between insAB and yfbQ, torR (P12X), uvrY (G31X), qseB (G33X), arcA (A25X), atoC (P49X), baeR (P11X), ntrC (G25X), rcsB (P13X), pyrR (Q25X), btsR (P11X), creB (L19X), basR (T22X)	22	YMA08302	psgRNA-basR2-8	ds basR_PAM2stop	This study
SSA04301	W3110 typeA, cusS (R15X), zraS (V21X), kdpD (L14X), phoQ (R50X), basS (W32X), baeS (L14X), cpxA (W14X), envZ (A13X), evgS (T17X), glrK (L17X), qseC (A32X), rcsC (T10X), rcsD (L31X), rstB (L22X), hprS (G22X), atoS (M19X), barA (L15X), creC (A24X), ntrB (L27X), phoR (L19X), uhpB (A20X), btsS (Q35X)	22	SSA04205	psgRNA-yehU2-4	ds yehU_PAM2stop	This study
YMA08601	W3110 typeA, phoB (P29X), phoP (G53X), ompR (L16X), citB (L16X), narL (P16X), cpxR (R11X), uhpA (G16X), rstA (L21X), evgA (R40X), kdpE (T19X), Δ315-bp between insAB and yfbQ, torR (P12X), uvrY (G31X), qseB (G33X), arcA (A25X), atoC (P49X), baeR (P11X), ntrC (G25X), rcsB (P13X), pyrR (Q25X), btsR (P11X), creB (L19X), basR (T22X), cusR (G19X)	23	YMA08401	psgRNA-cusR2-2	ds cusR_PAM2stop	This study
SSA04401	W3110 typeA, cusS (R15X), zraS (V21X), kdpD (L14X), phoQ (R50X), basS (W32X), baeS (L14X), cpxA (W14X), envZ (A13X), evgS (T17X), glrK (L17X), qseC (A32X), rcsC (T10X), rcsD (L31X), rstB (L22X), hprS (G22X), atoS (M19X), barA (L15X), creC (A24X), ntrB (L27X), phoR (L19X), uhpB (A20X), btsS (Q35X), pyrS (L22X)	23	SSA04301	psgRNA-ypdA3-1	ds ypdA_PAM3stop	This study
YMA08701	W3110 typeA, phoB (P29X), phoP (G53X), ompR (L16X), citB (L16X), narL (P16X), cpxR (R11X), uhpA (G16X), rstA (L21X), evgA (R40X), kdpE (T19X), Δ315-bp between insAB and yfbQ, torR (P12X), uvrY (G31X), qseB (G33X), arcA (A25X), atoC (P49X), baeR (P11X), ntrC (G25X), rcsB (P13X), pyrR (Q25X), btsR (P11X), creB (L19X), basR (T22X), cusR (G19X), narP (A38X)	24	YMA08601	psgRNA-narP9-1	ds narP_PAM9stop	This study
SSA04504	W3110 typeA, cusS (R15X), zraS (V21X), kdpD (L14X), phoQ (R50X), basS (W32X), baeS (L14X), cpxA (W14X), envZ (A13X), evgS (T17X), glrK (L17X), qseC (A32X), rcsC (T10X), rcsD (L31X), rstB (L22X), hprS (G22X), atoS (M19X), barA (L15X), creC (A24X), ntrB (L27X), phoR (L19X), uhpB (A20X), btsS (Q35X), pyrS (L22X), arcB (L20X)	24	SSA04401	psgRNA-arcB2-1	ds arcB_PAM2stop	This study
YMA08801	W3110 typeA, phoB (P29X), phoP (G53X), ompR (L16X), citB (L16X), narL (P16X), cpxR (R11X), uhpA (G16X), rstA (L21X), evgA (R40X), kdpE (T19X), Δ315-bp between insAB and yfbQ, torR (P12X), uvrY (G31X), qseB (G33X), arcA (A25X), atoC (P49X), baeR (P11X), ntrC (G25X), rcsB (P13X), pyrR (Q25X), btsR (P11X), creB (L19X), basR (T22X), cusR (G19X), narP (A38X), zraR (H17X), lolE (L328L [CTG→TTG])	25	YMA08701	psgRNA-zraR1-1	ds zraR_PAM1stop	This study
SSA04601	W3110 typeA, cusS (R15X), zraS (V21X), kdpD (L14X), phoQ (R50X), basS (W32X), baeS (L14X), cpxA (W14X), envZ (A13X), evgS (T17X), glrK (L17X), qseC (A32X), rcsC (T10X), rcsD (L31X), rstB (L22X), hprS (G22X), atoS (M19X), barA (L15X), creC (A24X), ntrB (L27X), phoR (L19X), uhpB (A20X), btsS (Q35X), pyrS (L22X), arcB (L20X), citA (L37X)	25	SSA04504	psgRNA-citA3-5	ds citA_PAM3stop	This study
YMA09001	W3110 typeA, phoB (P29X), phoP (G53X), ompR (L16X), citB (L16X), narL (P16X), cpxR (R11X), uhpA (G16X), rstA (L21X), evgA (R40X), kdpE (T19X), Δ315-bp between insAB and yfbQ, torR (P12X), uvrY (G31X), qseB (G33X), arcA (A25X), atoC (P49X), baeR (P11X), ntrC (G25X), rcsB (P13X), pyrR (Q25X), btsR (P11X), creB (L19X), basR (T22X), cusR (G19X), narP (A38X), zraR (H17X), lolE (L328L [CTG→TTG]), glrR …	26	YMA08801	psgRNA-glrR1-1	ds glrR_PAM1stop	This study
YMA09703	W3110 typeA, phoB (P29X), phoP (G53X), ompR (L16X), citB (L16X), narL (P16X), cpxR (R11X), uhpA (G16X), rstA (L21X), evgA (R40X), kdpE (T19X), Δ315-bp between insAB and yfbQ, torR (P12X), uvrY (G31X), qseB (G33X), arcA (A25X), atoC (P49X), baeR (P11X), ntrC (G25X), rcsB (P13X), pyrR (Q25X), btsR (P11X), creB (L19X), basR (T22X), cusR (G19X), narP (A38X), zraR (H17X), lolE (L328L [CTG→TTG]), rssB …	26	YMA08801	psgRNA-rssB2-5	ds rssB_PAM2stop	This study
SSA04701	W3110 typeA, cusS (R15X), zraS (V21X), kdpD (L14X), phoQ (R50X), basS (W32X), baeS (L14X), cpxA (W14X), envZ (A13X), evgS (T17X), glrK (L17X), qseC (A32X), rcsC (T10X), rcsD (L31X), rstB (L22X), hprS (G22X), atoS (M19X), barA (L15X), creC (A24X), ntrB (L27X), phoR (L19X), uhpB (A20X), btsS (Q35X), pyrS (L22X), arcB (L20X), citA (L37X), dcuS (P14X)	26	SSA04601	psgRNA-dcuS1-1	ds dcuS_PAM1stop	This study
YMA09101	W3110 typeA, phoB (P29X), phoP (G53X), ompR (L16X), citB (L16X), narL (P16X), cpxR (R11X), uhpA (G16X), rstA (L21X), evgA (R40X), kdpE (T19X), Δ315-bp between insAB and yfbQ, torR (P12X), uvrY (G31X), qseB (G33X), arcA (A25X), atoC (P49X), baeR (P11X), ntrC (G25X), rcsB (P13X), pyrR (Q25X), btsR (P11X), creB (L19X), basR (T22X), cusR (G19X), narP (A38X), zraR (H17X), lolE (L328L [CTG→TTG]), glrR …	27	YMA09001	psgRNA-fimZ1-1	ds fimZ_PAM1stop	This study
YMA09801	W3110 typeA, phoB (P29X), phoP (G53X), ompR (L16X), citB (L16X), narL (P16X), cpxR (R11X), uhpA (G16X), rstA (L21X), evgA (R40X), kdpE (T19X), Δ315-bp between insAB and yfbQ, torR (P12X), uvrY (G31X), qseB (G33X), arcA (A25X), atoC (P49X), baeR (P11X), ntrC (G25X), rcsB (P13X), pyrR (Q25X), btsR (P11X), creB (L19X), basR (T22X), cusR (G19X), narP (A38X), zraR (H17X), lolE (L328L [CTG→TTG]), rssB …	27	YMA09703	psgRNA-glrR1-1	ds glrR_PAM1stop	This study
SSA04801	W3110 typeA, cusS (R15X), zraS (V21X), kdpD (L14X), phoQ (R50X), basS (W32X), baeS (L14X), cpxA (W14X), envZ (A13X), evgS (T17X), glrK (L17X), qseC (A32X), rcsC (T10X), rcsD (L31X), rstB (L22X), hprS (G22X), atoS (M19X), barA (L15X), creC (A24X), ntrB (L27X), phoR (L19X), uhpB (A20X), btsS (Q35X), pyrS (L22X), arcB (L20X), citA (L37X), dcuS (P14X), narQ (R13X)	27	SSA04701	psgRNA-narQ2-1	ds narQ_PAM2stop	This study
YMA09901	W3110 typeA, phoB (P29X), phoP (G53X), ompR (L16X), citB (L16X), narL (P16X), cpxR (R11X), uhpA (G16X), rstA (L21X), evgA (R40X), kdpE (T19X), Δ315-bp between insAB and yfbQ, torR (P12X), uvrY (G31X), qseB (G33X), arcA (A25X), atoC (P49X), baeR (P11X), ntrC (G25X), rcsB (P13X), pyrR (Q25X), btsR (P11X), creB (L19X), basR (T22X), cusR (G19X), narP (A38X), zraR (H17X), lolE (L328L [CTG→TTG]), rssB …	28	YMA09801	psgRNA-fimZ1-1	ds fimZ_PAM1stop	This study
YMA09201	W3110 typeA, phoB (P29X), phoP (G53X), ompR (L16X), citB (L16X), narL (P16X), cpxR (R11X), uhpA (G16X), rstA (L21X), evgA (R40X), kdpE (T19X), Δ315-bp between insAB and yfbQ, torR (P12X), uvrY (G31X), qseB (G33X), arcA (A25X), atoC (P49X), baeR (P11X), ntrC (G25X), rcsB (P13X), pyrR (Q25X), btsR (P11X), creB (L19X), basR (T22X), cusR (G19X), narP (A38X), zraR (H17X), lolE (L328L [CTG→TTG]), glrR …	28	YMA09101	psgRNA-ygeK3-2	ds ygeK_PAM3stop	This study
SSA04902	W3110 typeA, cusS (R15X), zraS (V21X), kdpD (L14X), phoQ (R50X), basS (W32X), baeS (L14X), cpxA (W14X), envZ (A13X), evgS (T17X), glrK (L17X), qseC (A32X), rcsC (T10X), rcsD (L31X), rstB (L22X), hprS (G22X), atoS (M19X), barA (L15X), creC (A24X), ntrB (L27X), phoR (L19X), uhpB (A20X), btsS (Q35X), pyrS (L22X), arcB (L20X), citA (L37X), dcuS (P14X), narQ (R13X), narX (Q14X)	28	SSA04801	psgRNA-narX1-2	ds narX_PAM1stop	This study
YMA09304	W3110 typeA, phoB (P29X), phoP (G53X), ompR (L16X), citB (L16X), narL (P16X), cpxR (R11X), uhpA (G16X), rstA (L21X), evgA (R40X), kdpE (T19X), Δ315-bp between insAB and yfbQ, torR (P12X), uvrY (G31X), qseB (G33X), arcA (A25X), atoC (P49X), baeR (P11X), ntrC (G25X), rcsB (P13X), pyrR (Q25X), btsR (P11X), creB (L19X), basR (T22X), cusR (G19X), narP (A38X), zraR (H17X), lolE (L328L [CTG→TTG]), glrR …	29	YMA09201	psgRNA-dcuR7-4	ds dcuR_PAM2stop	This study
YMA10005	W3110 typeA, phoB (P29X), phoP (G53X), ompR (L16X), citB (L16X), narL (P16X), cpxR (R11X), uhpA (G16X), rstA (L21X), evgA (R40X), kdpE (T19X), Δ315-bp between insAB and yfbQ, torR (P12X), uvrY (G31X), qseB (G33X), arcA (A25X), atoC (P49X), baeR (P11X), ntrC (G25X), rcsB (P13X), pyrR (Q25X), btsR (P11X), creB (L19X), basR (T22X), cusR (G19X), narP (A38X), zraR (H17X), lolE (L328L [CTG→TTG]), rssB …	29	YMA09901	psgRNA-ygeL3-2	ds ygeK_PAM3stop	This study
SSA05001	W3110 typeA, cusS (R15X), zraS (V21X), kdpD (L14X), phoQ (R50X), basS (W32X), baeS (L14X), cpxA (W14X), envZ (A13X), evgS (T17X), glrK (L17X), qseC (A32X), rcsC (T10X), rcsD (L31X), rstB (L22X), hprS (G22X), atoS (M19X), barA (L15X), creC (A24X), ntrB (L27X), phoR (L19X), uhpB (A20X), btsS (Q35X), pyrS (L22X), arcB (L20X), citA (L37X), dcuS (P14X), narQ (R13X), narX (Q14X), torS (L15X)	29	SSA04902	psgRNA-torS3-2	ds torS_PAM3stop	This study
YMA10101	W3110 typeA, phoB (P29X), phoP (G53X), ompR (L16X), citB (L16X), narL (P16X), cpxR (R11X), uhpA (G16X), rstA (L21X), evgA (R40X), kdpE (T19X), Δ315-bp between insAB and yfbQ, torR (P12X), uvrY (G31X), qseB (G33X), arcA (A25X), atoC (P49X), baeR (P11X), ntrC (G25X), rcsB (P13X), pyrR (Q25X), btsR (P11X), creB (L19X), basR (T22X), cusR (G19X), narP (A38X), zraR (H17X), lolE (L328L [CTG→TTG]), rssB …	30	YMA10005	psgRNA-dcuR7-4	ds dcuR_PAM2stop	This study
YMA09401	W3110 typeA, phoB (P29X), phoP (G53X), ompR (L16X), citB (L16X), narL (P16X), cpxR (R11X), uhpA (G16X), rstA (L21X), evgA (R40X), kdpE (T19X), Δ315-bp between insAB and yfbQ, torR (P12X), uvrY (G31X), qseB (G33X), arcA (A25X), atoC (P49X), baeR (P11X), ntrC (G25X), rcsB (P13X), pyrR (Q25X), btsR (P11X), creB (L19X), basR (T22X), cusR (G19X), narP (A38X), zraR (H17X), lolE (L328L [CTG→TTG]), glrR …	30	YMA09304	psgRNA-yhjB2-2	ds yhjB_PAM2stop	This study
SSA05102	W3110 typeA, cusS (R15X), zraS (V21X), kdpD (L14X), phoQ (R50X), basS (W32X), baeS (L14X), cpxA (W14X), envZ (A13X), evgS (T17X), glrK (L17X), qseC (A32X), rcsC (T10X), rcsD (L31X), rstB (L22X), hprS (G22X), atoS (M19X), barA (L15X), creC (A24X), ntrB (L27X), phoR (L19X), uhpB (A20X), btsS (Q35X), pyrS (L22X), arcB (L20X), citA (L37X), dcuS (P14X), narQ (R13X), narX (Q14X), torS (L15X), cheA (L20…	30	SSA05001	psgRNA-cheA1-1	ds cheA_PAM1stop	This study
KYA03321	W3110 typeA, cusS (R15X), zraS (V21X), kdpD (L14X), phoQ (R50X), basS (W32X), baeS (L14X), cpxA (W14X), envZ (A13X), evgS (T17X), glrK (L17X), qseC (A32X), rcsC (T10X), rcsD (L31X), rstB (L22X), hprS (G22X), atoS (M19X), barA (L15X), creC (A24X), ntrB (L27X), phoR (L19X), uhpB (A20X), btsS (Q35X), pyrS (L22X), arcB (L20X), citA (L37X), dcuS (P14X), narQ (R13X), narX (Q14X), torS (L15X), cheA (L20…	31	SSA05102	psgRNA-baeR1-1	ds baeR_PAM1stop	This study
YMA09502	W3110 typeA, phoB (P29X), phoP (G53X), ompR (L16X), citB (L16X), narL (P16X), cpxR (R11X), uhpA (G16X), rstA (L21X), evgA (R40X), kdpE (T19X), Δ315-bp between insAB and yfbQ, torR (P12X), uvrY (G31X), qseB (G33X), arcA (A25X), atoC (P49X), baeR (P11X), ntrC (G25X), rcsB (P13X), pyrR (Q25X), btsR (P11X), creB (L19X), basR (T22X), cusR (G19X), narP (A38X), zraR (H17X), lolE (L328L [CTG→TTG]), glrR …	31	YMA09401	psgRNA-cheB1-1	ds cheB_PAM1stop	This study
RHA00401	W3110 typeA, cusS (R15X), zraS (V21X), kdpD (L14X), phoQ (R50X), basS (W32X), baeS (L14X), cpxA (W14X), envZ (A13X), evgS (T17X), glrK (L17X), qseC (A32X), rcsC (T10X), rcsD (L31X), rstB (L22X), hprS (G22X), atoS (M19X), barA (L15X), creC (A24X), ntrB (L27X), phoR (L19X), uhpB (A20X), btsS (Q35X), pyrS (L22X), arcB (L20X), citA (L37X), dcuS (P14X), narQ (R13X), narX (Q14X), torS (L15X), cheA (L20…	31	SSA05102	psgRNA-cpxR2-12	ds cpxR_PAM2_D51A	This study
KYA03101	W3110 typeA, cusS (R15X), zraS (V21X), kdpD (L14X), phoQ (R50X), basS (W32X), baeS (L14X), cpxA (W14X), envZ (A13X), evgS (T17X), glrK (L17X), qseC (A32X), rcsC (T10X), rcsD (L31X), rstB (L22X), hprS (G22X), atoS (M19X), barA (L15X), creC (A24X), ntrB (L27X), phoR (L19X), uhpB (A20X), btsS (Q35X), pyrS (L22X), arcB (L20X), citA (L37X), dcuS (P14X), narQ (R13X), narX (Q14X), torS (L15X), cheA (L20…	31	SSA05102	psgRNA-cusR2-2	ds cusR_PAM2stop	This study
KYA03201	W3110 typeA, cusS (R15X), zraS (V21X), kdpD (L14X), phoQ (R50X), basS (W32X), baeS (L14X), cpxA (W14X), envZ (A13X), evgS (T17X), glrK (L17X), qseC (A32X), rcsC (T10X), rcsD (L31X), rstB (L22X), hprS (G22X), atoS (M19X), barA (L15X), creC (A24X), ntrB (L27X), phoR (L19X), uhpB (A20X), btsS (Q35X), pyrS (L22X), arcB (L20X), citA (L37X), dcuS (P14X), narQ (R13X), narX (Q14X), torS (L15X), cheA (L20…	31	SSA05102	psgRNA-fimZ1-1	ds fimZ_PAM1stop	This study
KYA02901	W3110 typeA, cusS (R15X), zraS (V21X), kdpD (L14X), phoQ (R50X), basS (W32X), baeS (L14X), cpxA (W14X), envZ (A13X), evgS (T17X), glrK (L17X), qseC (A32X), rcsC (T10X), rcsD (L31X), rstB (L22X), hprS (G22X), atoS (M19X), barA (L15X), creC (A24X), ntrB (L27X), phoR (L19X), uhpB (A20X), btsS (Q35X), pyrS (L22X), arcB (L20X), citA (L37X), dcuS (P14X), narQ (R13X), narX (Q14X), torS (L15X), cheA (L20…	31	SSA05102	psgRNA-ntrC2-4	ds ntrC_PAM2stop	This study
KYA03001	W3110 typeA, cusS (R15X), zraS (V21X), kdpD (L14X), phoQ (R50X), basS (W32X), baeS (L14X), cpxA (W14X), envZ (A13X), evgS (T17X), glrK (L17X), qseC (A32X), rcsC (T10X), rcsD (L31X), rstB (L22X), hprS (G22X), atoS (M19X), barA (L15X), creC (A24X), ntrB (L27X), phoR (L19X), uhpB (A20X), btsS (Q35X), pyrS (L22X), arcB (L20X), citA (L37X), dcuS (P14X), narQ (R13X), narX (Q14X), torS (L15X), cheA (L20…	31	SSA05102	psgRNA-phoB1-17	ds phoB_PAM1stop	This study
YMA10801	W3110 typeA, phoB (P29X), phoP (G53X), ompR (L16X), citB (L16X), narL (P16X), cpxR (R11X), uhpA (G16X), rstA (L21X), evgA (R40X), kdpE (T19X), Δ315-bp between insAB and yfbQ, torR (P12X), uvrY (G31X), qseB (G33X), arcA (A25X), atoC (P49X), baeR (P11X), ntrC (G25X), rcsB (P13X), pyrR (Q25X), btsR (P11X), creB (L19X), basR (T22X), cusR (G19X), narP (A38X), zraR (H17X), lolE (L328L [CTG→TTG]), rssB …	31	YMA10101	psgRNA-yhjB2-2	ds yhjB_PAM2stop	This study
HMA00103	W3110 typeA, cusS (R15X), zraS (V21X), kdpD (L14X), phoQ (R50X), basS (W32X), baeS (L14X), cpxA (W14X), envZ (A13X), evgS (T17X), glrK (L17X), qseC (A32X), rcsC (T10X), rcsD (L31X), rstB (L22X), hprS (G22X), atoS (M19X), barA (L15X), creC (A24X), ntrB (L27X), phoR (L19X), uhpB (A20X), btsS (Q35X), pyrS (L22X), arcB (L20X), citA (L37X), dcuS (P14X), narQ (R13X), narX (Q14X), torS (L15X), cheA (L20…	31	SSA05102	psgRNA-ntrC4	ds ntrC_PAM4_D54A	This study
KYA04621	W3110 typeA, cusS (R15X), zraS (V21X), kdpD (L14X), phoQ (R50X), basS (W32X), baeS (L14X), cpxA (W14X), envZ (A13X), evgS (T17X), glrK (L17X), qseC (A32X), rcsC (T10X), rcsD (L31X), rstB (L22X), hprS (G22X), atoS (M19X), barA (L15X), creC (A24X), ntrB (L27X), phoR (L19X), uhpB (A20X), btsS (Q35X), pyrS (L22X), arcB (L20X), citA (L37X), dcuS (P14X), narQ (R13X), narX (Q14X), torS (L15X), cheA (L20…	31	SSA05102	psgRNA-yedW17	ds yedW_PAM17stop	This study
KYA05433	W3110 typeA, cusS (R15X), zraS (V21X), kdpD (L14X), phoQ (R50X), basS (W32X), baeS (L14X), cpxA (W14X), envZ (A13X), evgS (T17X), glrK (L17X), qseC (A32X), rcsC (T10X), rcsD (L31X), rstB (L22X), hprS (G22X), atoS (M19X), barA (L15X), creC (A24X), ntrB (L27X), phoR (L19X), uhpB (A20X), btsS (Q35X), pyrS (L22X), arcB (L20X), citA (L37X), dcuS (P14X), narQ (R13X), narX (Q14X), torS (L15X), cheA (L20…	31	SSA05102	psgRNA-phoB9	ds phoB_PAM9	This study
KYA05531	W3110 typeA, cusS (R15X), zraS (V21X), kdpD (L14X), phoQ (R50X), basS (W32X), baeS (L14X), cpxA (W14X), envZ (A13X), evgS (T17X), glrK (L17X), qseC (A32X), rcsC (T10X), rcsD (L31X), rstB (L22X), hprS (G22X), atoS (M19X), barA (L15X), creC (A24X), ntrB (L27X), phoR (L19X), uhpB (A20X), btsS (Q35X), pyrS (L22X), arcB (L20X), citA (L37X), dcuS (P14X), narQ (R13X), narX (Q14X), torS (L15X), cheA (L20…	31	SSA05102	psgRNA-phoB9	ds phoB_PAM9_D53A	This study
GHA00201	W3110 typeA, cusS (R15X), zraS (V21X), kdpD (L14X), phoQ (R50X), basS (W32X), baeS (L14X), cpxA (W14X), envZ (A13X), evgS (T17X), glrK (L17X), qseC (A32X), rcsC (T10X), rcsD (L31X), rstB (L22X), hprS (G22X), atoS (M19X), barA (L15X), creC (A24X), ntrB (L27X), phoR (L19X), uhpB (A20X), btsS (Q35X), pyrS (L22X), arcB (L20X), citA (L37X), dcuS (P14X), narQ (R13X), narX (Q14X), torS (L15X), cheA (L20…	31	SSA05102	psgRNA-cpxR7	ds cpxR_PAM7stop	This study
YMA11402	W3110 typeA, phoB (P29X), phoP (G53X), ompR (L16X), citB (L16X), narL (P16X), cpxR (R11X), uhpA (G16X), rstA (L21X), evgA (R40X), kdpE (T19X), Δ315-bp between insAB and yfbQ, torR (P12X), uvrY (G31X), qseB (G33X), arcA (A25X), atoC (P49X), baeR (P11X), ntrC (G25X), rcsB (P13X), pyrR (Q25X), btsR (P11X), creB (L19X), basR (T22X), cusR (G19X), narP (A38X), zraR (H17X), lolE (L328L [CTG→TTG]), rssB …	32	YMA10801	psgRNA-cheB1-1	ds cheB_PAM1stop	This study
YMA09601	W3110 typeA, phoB (P29X), phoP (G53X), ompR (L16X), citB (L16X), narL (P16X), cpxR (R11X), uhpA (G16X), rstA (L21X), evgA (R40X), kdpE (T19X), Δ315-bp between insAB and yfbQ, torR (P12X), uvrY (G31X), qseB (G33X), arcA (A25X), atoC (P49X), baeR (P11X), ntrC (G25X), rcsB (P13X), pyrR (Q25X), btsR (P11X), creB (L19X), basR (T22X), cusR (G19X), narP (A38X), zraR (H17X), lolE (L328L [CTG→TTG]), glrR …	32	YMA09502	psgRNA-cheY2-2	ds cheY_PAM2stop	This study
YMA11501	W3110 typeA, phoB (P29X), phoP (G53X), ompR (L16X), citB (L16X), narL (P16X), cpxR (R11X), uhpA (G16X), rstA (L21X), evgA (R40X), kdpE (T19X), Δ315-bp between insAB and yfbQ, torR (P12X), uvrY (G31X), qseB (G33X), arcA (A25X), atoC (P49X), baeR (P11X), ntrC (G25X), rcsB (P13X), pyrR (Q25X), btsR (P11X), creB (L19X), basR (T22X), cusR (G19X), narP (A38X), zraR (H17X), lolE (L328L [CTG→TTG]), rssB …	33	YMA11402	psgRNA-cheY2-2	ds cheY_PAM2stop	This study
YMA11623	W3110 typeA, phoB (P29X), phoP (G53X), ompR (L16X), citB (L16X), narL (P16X), cpxR (R11X), uhpA (G16X), rstA (L21X), evgA (R40X), kdpE (T19X), Δ315-bp between insAB and yfbQ, torR (P12X), uvrY (G31X), qseB (G33X), arcA (A25X), atoC (P49X), baeR (P11X), ntrC (G25X), rcsB (P13X), pyrR (Q25X), btsR (P11X), creB (L19X), basR (T22X), cusR (G19X), narP (A38X), zraR (H17X), lolE (L328L [CTG→TTG]), rssB …	34	YMA11501	psgRNA-yedW1-1	ds yedW_PAM1stop	This study
aEach genome editing is shown in Fig. S1.
