# Supplementary material
Source: Research Square preprint supplement (doi:10.21203/rs.3.rs-9685923/v1)
Supplement: Supplementary file 6 [file eabbb86dd6e37e335143dde1.xlsx]

## Sheet: Table S4-1
Table S4-1. W3110 typeA genome structure.
Locationa	Function	W3110 type Ab
crl	sigma factor-binding protein, stimulates RNA polymerase holoenzyme formation	deletion of insABc
folD	5,10-methylene-tetrahydrofolate dehydrogenase 5,10-methylene-tetrahydrofolate cyclohydrolase	Gln36 (CAG)
yccE	hypothetical protein	Cys415 (TGT)
csgC / ymdA		insC, insDc
ychE / oppA		deletion of insH
oppA	oligopeptide transporter subunit	Gly273 (GGC)
acnA	aconitate hydratase 1	Gly522 (GGC)c
ynaJ, uspE, fnr, ogt, abgT, abgB, abgA	(1,398,958..1,406,267)	deletion
ydaO (ttcA)	tRNA 2-thiocytidine biosynthesis protein	Glu6 (GAA), Ser8 (AGT)
intR, ydaQ, ydaC, lar, recT, recE, racC, ydaE, kil, sieB, ydaF, ydaG, racR, ydaS, ydaT, ydaU, ydaV, ydaW, rzpR, rzoR, trkG, ynaK, ydaY, ynaA, lomR (insH is inserted), stfR, tfaR, pinR, ynaE	Rac prophage region	deletion
intQ	pseudogene, Qin prophage	Leu274 (CTC)c
ynhF / purR		1-nt substitution
flhD / uspC		insHc
yedJ	putative hydrolase	V219 (GTT)c
gatC	galactitol-specific enzyme IIC component of PTS	Gly306fs (917_918delGG)c
lrhA / alaA(yfbQ)		insA, insBc
rpoS	RNA polymerase, sigma S (sigma 38) factor	Tyr33 (TAT)
pyrG	CTP synthetase	His450 (CAC)
crp	DNA-binding transcriptional dual regulator	Lys29 (AAG)c
glpR	DNA-binding transcriptional repressor	Ala51fs (150_151insC)c
rffM	UDP-N-acetyl-D-mannosaminuronic acid transferase	Ile91 (ATT)
aIntergenic regions are shown as gene / gene.
bThe sequence differences between W3110 type A and MG1655 (GenBank: U00096.3).
cThe same sequence of W3110 (GenBank: AP009048.1).

## Sheet: Table S4-2
Table S4-2. SSA05102 genome structure.
Location	Function	SSA05102a
phoR	sensor kinase in two-component regulatory system with PhoB	Stop19 (TAA)
cusS	sensor kinase in two-component regulatory system with CusR	Stop15 (TAA)
citA	sensor kinase in two-component regulatory system with CitB	Stop37 (TAA)
kdpD	sensor kinase in two-component regulatory system with KdpE	Stop14 (TAA)
torS	sensor kinase in two-component regulatory system with TorR	Stop15 (TAA)
phoQ	sensor kinase in two-component regulatory system with PhoP	Stop50 (TAA)
narX	sensor kinase in two-component regulatory system with NarL	Stop14 (TAA)
rstB	sensor kinase in two-component regulatory system with RstA	Stop22 (TAA)
cheA	sensor kinase in two-component regulatory system with CheB and CheY	Stop20 (TAA)
hprS	sensor kinase in two-component regulatory system with HprR	Stop22 (TAA)
baeS	sensor kinase in two-component regulatory system with BaeR	Stop14 (TAA)
btsS	sensor kinase in two-component regulatory system with BtsR	Stop35 (TAA)
rcsD	phosphotransfer intermediate protein in two-component regulatory system with RcsBC	Stop31 (TAA)
rcsC	sensor kinase in two-component regulatory system with RcsBD	Stop31 (TAA)
atoS	sensor kinase in two-component regulatory system with AtoC	Stop19 (TAA)
evgS	sensor kinase in two-component regulatory system with EvgA	Stop17 (TAA)
pyrS	sensor kinase in two-component regulatory system with PyrR	Stop22 (TAA)
narQ	sensor kinase in two-component regulatory system with NarP	Stop13 (TAA)
glrK	sensor kinase in two-component regulatory system with GlrR	Stop17 (TAA)
barA	sensor kinase in two-component regulatory system with UvrY	Stop15 (TAA)
qseC	sensor kinase in two-component regulatory system with QseB	Stop32 (TAA)
arcB	sensor kinase in two-component regulatory system with ArcA	Stop20 (TAA)
zraS	sensor kinase in two-component regulatory system with ZraR	Stop21 (TAA)
cpxA	sensor kinase in two-component regulatory system with CpxR	Stop14 (TAA)
ntrB	sensor kinase in two-component regulatory system with NtrC	Stop27 (TAA)
uhpB	sensor kinase in two-component regulatory system with UhpA	Stop20 (TAA)
envZ	sensor kinase in two-component regulatory system with OmpR	Stop13 (TAA)
basS	sensor kinase in two-component regulatory system with BasR	Stop32 (TAA)
dcuS	sensor kinase in two-component regulatory system with DcuR	Stop14 (TAA)
creC	sensor kinase in two-component regulatory system with CreB or PhoB	Stop24 (TAA)
aThe sequence differences between SSA05102 and W3110 typeA.

## Sheet: Table S4-3
Table S4-3. YMA11623 genome structure.
Locationa	Function	YMA11623b
phoB	DNA-binding response regulator in two-component regulatory system with PhoR	Stop29 (TAA)
fimZ	DNA-binding response regulator	Stop13 (TAA)
cusR	DNA-binding response regulator in two-component regulatory system with CusS	Stop19 (TAA)
citB	DNA-binding response regulator in two-component regulatory system with CitA	Stop16 (TAA)
kdpE	DNA-binding response regulator in two-component regulatory system with KdpD	Stop19 (TAA)
torR	DNA-binding response regulator in two-component regulatory system with TorS	Stop12 (TAA)
lolE	outer membrane-specific lipoprotein transporter subunit	Leu328 (TTG)
phoP	DNA-binding response regulator in two-component regulatory system with PhoQ	Stop53 (TAA)
narL	DNA-binding response regulator in two-component regulatory system with NarX	Stop16 (TAA)
rssB	response regulator of RpoS	Stop26 (TAA)
rstA	DNA-binding response regulator in two-component regulatory system with RstB	Stop24 (TAA)
cheY	chemotaxis response regulator regulator in two-component regulatory system with CheA	Stop16 (TAA)
cheB	chemotaxis response regulator regulator in two-component regulatory system with CheA	Stop12 (TAA)
uvrY	DNA-binding response regulator in two-component regulatory system with BarA	Stop31 (TAA)
hprR	DNA-binding response regulator in two-component regulatory system with HprS	Stop13 (TAA)
baeR	DNA-binding response regulator in two-component regulatory system with BaeS	Stop11 (TAA)
btsR	DNA-binding response regulator in two-component regulatory system with BtsS	Stop11 (TAA)
narP	DNA-binding response regulator in two-component regulatory system with NarQ	Stop38 (TAA)
rcsB	DNA-binding response regulator in two-component regulatory system with RcsCD	Stop13 (TAA)
atoC	DNA-binding response regulator in two-component regulatory system with AtoS	Stop49 (TAA)
insAB / yfbQ		315 bp deletion
evgA	DNA-binding response regulator in two-component regulatory system with EvgS	Stop40 (TAA)
pyrR	DNA-binding response regulator in two-component regulatory system with PyrS	Stop25 (TAA)
glrR	DNA-binding response regulator in two-component regulatory system with GlrK	Stop15 (TAA)
hydN / ascG		1-nt substitution
ygeK	DNA-binding transcriptional regulator (OmpR family)	Stop13 (TAA)
qseB	DNA-binding response regulator in two-component regulatory system with QseC	Stop33 (TAA)
zraR	DNA-binding response regulator in two-component regulatory system with ZraS	Stop17 (TAA)
cpxR	DNA-binding response regulator in two-component regulatory system with CpxA	Stop11 (TAA)
yihQ	alpha-glucosidase	Cys528 (TGC)
ntrC	DNA-binding response regulator in two-component regulatory system with NtrB	Stop25 (TAA)
uhpA	DNA-binding response regulator in two-component regulatory system with UhpB	Stop16 (TAA)
yhjB	DNA-binding transcriptional regulator (OmpR family)	Stop26 (TAA)
ompR	DNA-binding response regulator in two-component regulatory system with EnvZ	Stop16 (TAA)
basR	DNA-binding response regulator in two-component regulatory system with BasS	Stop22 (TAA)
dcuR	DNA-binding response regulator in two-component regulatory system with DcuS	Stop25 (TAA)
creB	DNA-binding response regulator in two-component regulatory system with CreC	Stop19 (TAA)
arcA	DNA-binding response regulator in two-component regulatory system withh ArcB	Stop25 (TAA)
aIntergenic regions are shown as gene / gene.
bThe sequence differences between between YMA11623 and W3110 typeA.

## Sheet: Table S4-4
Table S4-4. Spontaneous mutations in the derivatives of YMA11623.
Strain	The number of the editing locus	lolE Leu328 (CTG→TTG)	insAB/yfbQ (315 bp deletion)	hydN/ascG (T→C)	yihQ Ser528Cys (AGC→TGC)
YMA00201	1	-	-	-	-
YMA02201	2	-	-	-	-
YMA02302	3	-	-	-	-
YMA02601	4	-	-	-	-
YMA04701	5	-	-	-	-
YMA04814	6	-	-	-	-
YMA04901	7	-	-	-	-
YMA05001	8	-	-	-	-
YMA05103	9	-	-	-	-
YMA05201	10	-	+	-	-
YMA05401	11	-	+	-	-
YMA05601	12	-	+	-	-
YMA05701	13	-	+	-	-
YMA07601	14	-	+	-	-
YMA07701	15	-	+	-	-
YMA07806	16	-	+	-	-
YMA07901	17	-	+	-	-
YMA08001	18	-	+	-	-
YMA08108	19	-	+	-	-
YMA08201	20	-	+	-	-
YMA08302	21	-	+	-	-
YMA08401	22	-	+	-	-
YMA08601	23	-	+	-	-
YMA08701	24	-	+	-	-
YMA08801	25	+	+	-	-
YMA09703	26	+	+	-	-
YMA09801	27	+	+	-	+
YMA09901	28	+	+	-	+
YMA10005	29	+	+	-	+
YMA10101	30	+	+	-	+
YMA10801	31	+	+	-	+
YMA11402	32	+	+	+	+
YMA11501	33	+	+	+	+
YMA11623	34	+	+	+	+
